# Supplementary material for: Comprehensive Proteome and Lysine Acetylome Analysis Reveals the Widespread Involvement of Acetylation in Cold Resistance of Pepper (Capsicum annuum L.)
Source: Front Plant Sci. 2021 Aug 27;12:730489. doi: 10.3389/fpls.2021.730489 (PMC8429487; doi:10.3389/fpls.2021.730489)
Supplement: Supplementary Table 1 — Pepper protein intensity data under cold stress. [file Table_1.XLSX]

## Sheet: Sheet1
Table S1. Pepper protein intensity data under cold stress.								A188												A122
Protein accession	Protein description	Gene name	Mol. weight [kDa]	Sequence coverage [%]	MS/MS Counts	Peptides	Unique peptides	LFQ intensity T0_1	LFQ intensity T0_2	LFQ intensity T0_3	LFQ intensity T1_1	LFQ intensity T1_2	LFQ intensity T1_3	LFQ intensity T2_1	LFQ intensity T2_2	LFQ intensity T2_3	LFQ intensity R1_1	LFQ intensity R1_2	LFQ intensity R1_3	LFQ intensity T0_1	LFQ intensity T0_2	LFQ intensity T0_3	LFQ intensity T1_1	LFQ intensity T1_2	LFQ intensity T1_3	LFQ intensity T2_1	LFQ intensity T2_2	LFQ intensity T2_3	LFQ intensity R1_1	LFQ intensity R1_2	LFQ intensity R1_3
Capana00g000028	PIGX_RAT Phosphatidylinositol-glycan biosynthesis class X protein OS=Rattus norvegicus GN=Pigx PE=1 SV=2	Pigx	16.498	12.6	19	1	1	0	0	0	0	0	0	0	0	0	0	0	0	0	0	0	0	0	0	0	0	0	0	0	9733.4
Capana00g000039	NACA_PINTA Nascent polypeptide-associated complex subunit alpha-like protein OS=Pinus taeda PE=2 SV=1	---	17.385	65.2	68	8	3	736330	665270	670240	517730	589730	608340	689620	575480	703650	792240	765840	825790	596330	606290	557850	495030	485770	457360	675150	718050	750140	571500	582440	541730
Capana00g000060	MGLL_HUMAN Monoglyceride lipase OS=Homo sapiens GN=MGLL PE=1 SV=2	MGLL	36.095	15.9	14	3	3	0	0	70004	57022	78283	57910	0	82568	69125	60514	48929	54622	64762	56318	65439	63628	61535	71485	50035	62972	54927	56747	54014	52832
Capana00g000067	TL15B_ARATH Thylakoid lumenal 15.0 kDa protein 2, chloroplastic OS=Arabidopsis thaliana GN=At5g52970 PE=1 SV=2	At5g52970	18.145	52.7	144	6	6	701430	718310	758210	768740	754440	739600	771840	762480	833550	910970	902850	869730	610740	542230	600570	610310	599840	571420	634540	632200	597910	1025400	970780	987940
Capana00g000079	Putative ovule protein	---	20.189	9.2	5	1	1	46490	47711	38721	40053	33675	40348	0	46062	47694	25873	0	42143	0	0	0	0	0	43219	0	0	0	0	0	0
Capana00g000088	HBP1B_WHEAT Transcription factor HBP-1b(c38) OS=Triticum aestivum PE=2 SV=1	---	30.239	26.2	26	4	4	67047	59691	52602	47837	35298	41171	49119	50447	36755	46985	46909	40054	0	0	0	0	0	12680	0	0	0	0	0	0
Capana00g000108	MTND2_VITVI 1,2-dihydroxy-3-keto-5-methylthiopentene dioxygenase 2 OS=Vitis vinifera GN=VIT_05s0020g04080 PE=3 SV=1	VIT_05s0020g04080	18.711	50	121	8	8	313560	324510	306490	326580	296190	292120	240140	233390	246970	402380	382200	383710	299040	289960	284380	311300	298410	301470	308030	312170	285040	512630	493780	515480
Capana00g000134	U3 small nucleolar RNA-associated protein 6 homolog isoform X1	---	22.662	8.1	3	1	1	0	0	0	0	0	0	0	0	0	0	0	0	0	0	0	0	0	0	0	0	9877	0	0	0
Capana00g000178	K0664_ANOGA Protein KIAA0664 homolog OS=Anopheles gambiae GN=AGAP011851 PE=3 SV=4	AGAP011851	11.676	43.3	21	3	2	80119	72074	46457	55452	37934	51748	0	0	41058	0	49701	0	43391	51593	38387	46657	0	0	0	50167	0	0	0	0
Capana00g000197	P4HA1_CHICK Prolyl 4-hydroxylase subunit alpha-1 OS=Gallus gallus GN=P4HA1 PE=1 SV=1	P4HA1	13.985	22.7	32	2	2	87518	83300	84563	80233	90955	82855	69864	84690	0	93259	92745	91178	92319	89106	85398	86835	90294	87571	87264	92970	85597	120810	131310	128060
Capana00g000204	S1 motif domain-containing protein	---	19.128	32.8	24	4	4	108750	94892	94111	84849	86585	87760	115090	99828	102030	88851	88258	85080	90464	86052	87683	93401	88880	78727	96120	89906	113610	91003	66137	99695
Capana00g000247	ATPB_IPOOB ATP synthase subunit beta, chloroplastic OS=Ipomoea obscura GN=atpB PE=3 SV=1	atpB	23.33	42.2	3	5	0	0	0	0	0	0	0	0	0	0	0	0	0	0	0	0	0	0	0	0	0	0	0	0	86488
Capana00g000256	P2B12_ARATH Putative F-box protein PP2-B12 OS=Arabidopsis thaliana GN=PP2B12 PE=4 SV=1	PP2B12	11.784	18	8	1	1	0	0	0	0	0	0	0	0	0	0	0	0	0	0	0	0	0	0	0	0	0	0	29962	0
Capana00g000295	SBDS_CHICK Ribosome maturation protein SBDS OS=Gallus gallus GN=SBDS PE=2 SV=1	SBDS	16.978	20.4	25	2	2	22551	16000	17000	23130	20426	22582	0	18218	0	18263	21296	21578	16987	18177	20371	22670	22877	22292	25220	18767	0	15375	15579	18111
Capana00g000306	PCBP4_HUMAN Poly(rC)-binding protein 4 OS=Homo sapiens GN=PCBP4 PE=2 SV=1	PCBP4	28.071	33.7	2	6	1	0	0	0	0	0	0	0	0	0	0	0	0	0	0	0	0	0	0	0	0	0	0	0	8674
Capana00g000308	IF4E2_WHEAT Eukaryotic translation initiation factor 4E-2 OS=Triticum aestivum PE=1 SV=1	---	27.11	23.5	37	4	4	90105	134560	93281	113440	81142	112010	149570	125370	135020	161130	167650	152240	143640	141370	130210	122480	113640	116710	123840	138870	189370	252930	220250	185350
Capana00g000313	Putative ovule protein	---	12.367	17.5	18	1	1	0	0	0	0	0	0	0	0	0	0	0	0	0	0	0	0	0	0	0	0	14213	0	0	0
Capana00g000314	NIT2_HUMAN Omega-amidase NIT2 OS=Homo sapiens GN=NIT2 PE=1 SV=1	NIT2	18.182	57.5	137	8	8	1413300	1290900	1280200	1339800	1265400	1249500	1263400	1327300	1315600	1535000	1527900	1525200	1298200	1296300	1284900	1448600	1342600	1346800	1337400	1279400	1246600	1958200	2066800	2216400
Capana00g000315	BURPH_ORYSJ BURP domain-containing protein 17 OS=Oryza sativa subsp. japonica GN=BURP17 PE=2 SV=1	BURP17	52.454	15.6	17	4	4	98666	66894	67862	92383	79876	78851	0	0	0	63891	82992	131320	38616	44032	43476	52026	66761	0	25389	38395	0	80888	94180	110990
Capana00g000325	PTN23_HUMAN Tyrosine-protein phosphatase non-receptor type 23 OS=Homo sapiens GN=PTPN23 PE=1 SV=1	PTPN23	31.047	39.6	18	8	2	57567	59599	72679	61503	60541	77297	58825	59440	56179	50077	54325	51110	61065	54495	60064	54744	53171	56700	0	55162	56872	48809	51603	47688
Capana00g000332	ALF_ORYSJ Fructose-bisphosphate aldolase cytoplasmic isozyme OS=Oryza sativa subsp. japonica GN=FBA PE=1 SV=2	FBA	37.906	59.2	177	15	11	2499600	2407400	2086600	2565700	2355100	2266100	1660900	1653800	1947400	2146200	2188800	2079100	1146400	1199400	1309100	1123200	1125400	1139500	1362100	1295100	1221100	2048100	1939100	2193500
Capana00g000333	P4KA1_ARATH Phosphatidylinositol 4-kinase alpha OS=Arabidopsis thaliana GN=PI4KALPHA1 PE=1 SV=2	PI4KALPHA1	28.791	12.2	14	2	2	52698	67956	31836	0	0	0	0	0	44898	43401	0	0	0	0	0	44224	32330	0	49075	66302	0	0	0	0
Capana00g000357	protein KAKU4	---	11.143	27.5	19	2	2	0	0	0	0	0	0	0	0	0	274450	0	286140	291520	311710	315040	328540	316020	318040	304230	0	0	270430	309400	321700
Capana00g000362	UFL1_ARATH E3 UFM1-protein ligase 1 homolog OS=Arabidopsis thaliana GN=At3g46220 PE=2 SV=1	At3g46220	35.931	11.4	37	2	2	47083	41061	41796	35141	34669	26710	33678	39538	35726	38798	30923	30327	30488	37144	32786	48788	44689	33033	47394	53620	54402	0	0	10029
Capana00g000390	K0664_DROGR Protein KIAA0664 homolog OS=Drosophila grimshawi GN=GH22778 PE=3 SV=1	GH22778	51.98	27.6	31	7	6	76972	96298	86922	75346	82267	101080	66650	70239	55761	71274	73831	61017	50674	68632	61962	73633	94313	83945	106750	117440	87424	93390	64109	0
Capana00g000410	RPOC2_SOLTU DNA-directed RNA polymerase subunit beta'' OS=Solanum tuberosum GN=rpoC2 PE=3 SV=1	rpoC2	64.659	32.7	144	10	7	327920	281300	303530	279220	292840	263300	293700	286090	277280	171420	190410	192020	194030	192740	196400	229590	230120	210680	267830	269910	260060	29473	59109	37199
Capana00g000428	H2A_PETCR Histone H2A OS=Petroselinum crispum PE=2 SV=1	---	15.629	26.4	57	3	1	2874900	3299000	3562200	4297000	4103500	4344000	2550400	2870400	2521700	3350900	3427000	3666500	3535400	3584300	3708300	2875800	3401900	3497500	3033900	3148000	3039400	3497400	3014100	3323500
Capana00g000450	PSBD_LEPTE Photosystem II D2 protein OS=Leptosira terrestris GN=psbD PE=3 SV=1	psbD	13.54	34.4	26	4	1	0	0	0	0	0	0	0	0	0	0	0	0	0	0	0	0	0	0	0	0	0	0	0	228550
Capana00g000453	GCSH_FLAAN Glycine cleavage system H protein, mitochondrial OS=Flaveria anomala GN=GDCSH PE=2 SV=1	GDCSH	11.604	57.8	149	5	4	2867800	3132400	3069600	2336200	2330600	2219600	3439400	3569200	3504800	2625800	2906600	2758900	2885300	2680800	2455800	1430700	2566400	2742500	2832300	1650600	2096700	2986500	3269300	3151400
Capana00g000459	ALIX_DICDI ALG-2 interacting protein X OS=Dictyostelium discoideum GN=alxA PE=1 SV=1	alxA	48.124	28.3	57	8	2	139520	178520	177270	178840	172820	166220	138340	149580	154330	134650	149460	147260	165370	161280	149930	138230	157170	147790	127740	115220	137450	142830	117660	121770
Capana00g000465	OLP1_SOLLC Osmotin-like protein OS=Solanum lycopersicum PE=1 SV=1	---	27.314	33.3	138	8	8	1742700	1478700	1429300	1878000	1942700	1905200	605080	621320	620660	1270000	1255400	1285700	1367600	1343500	1362000	1287400	1231200	1256700	1034100	1003000	1002200	2716400	2790700	3051300
Capana00g000470	NLAL1_ARATH Putative H/ACA ribonucleoprotein complex subunit 1-like protein 1 OS=Arabidopsis thaliana GN=At3g03920 PE=2 SV=1	At3g03920	14.731	20.6	23	2	2	0	0	0	0	0	0	0	0	0	0	0	99039	0	0	0	0	139680	0	172460	0	0	0	0	65357
Capana00g000474	SUBL_ARATH Subtilisin-like protease OS=Arabidopsis thaliana GN=ARA12 PE=1 SV=1	ARA12	28.994	28.3	24	5	1	0	0	0	0	0	0	0	0	0	0	0	0	0	0	0	0	0	0	0	0	0	0	0	250540
Capana00g000481	switch-associated protein 70	---	36.12	25.2	60	6	6	97398	125570	111430	97278	116410	98215	80595	121010	92487	82388	99229	85218	108820	87889	114730	86374	55560	91013	109420	115170	96750	46307	60775	39447
Capana00g000485	LRKS5_ARATH Probable L-type lectin-domain containing receptor kinase S.5 OS=Arabidopsis thaliana GN=LECRKS5 PE=2 SV=1	LECRKS5	41.566	7.1	0	1	1	0	0	0	0	0	0	0	0	0	0	0	0	0	0	0	0	0	0	0	0	0	0	0	0
Capana00g000503	CLH2_ARATH Chlorophyllase-2, chloroplastic OS=Arabidopsis thaliana GN=CLH2 PE=1 SV=1	CLH2	34.969	13	24	3	3	52290	59179	46236	54417	46669	48348	0	49432	58556	0	32795	34243	24992	29312	28285	32481	27590	0	0	0	26846	0	27748	0
Capana00g000523	RAC2A_ARATH Ras-related protein RABC2a OS=Arabidopsis thaliana GN=RABC2A PE=1 SV=1	RABC2A	11.399	36	21	3	2	0	0	0	0	62189	59270	0	0	23826	0	43567	0	0	0	0	0	0	0	0	0	0	0	0	57708
Capana00g000559	VATE_CITLI V-type proton ATPase subunit E OS=Citrus limon GN=VATE PE=2 SV=1	VATE	30.262	58.6	159	11	7	536550	471030	430340	462080	446890	439290	433840	442300	442650	390730	392280	427000	377400	376810	365540	407330	420950	361530	400370	406400	394450	317630	330980	339620
Capana00g000562	PEAMT_SPIOL Phosphoethanolamine N-methyltransferase OS=Spinacia oleracea GN=PEAMT PE=1 SV=1	PEAMT	28.769	8.1	35	4	4	92308	62010	77191	69181	68173	67441	40044	42146	30749	50364	57330	0	0	57504	25353	44953	0	0	45742	51918	30874	0	29723	40583
Capana00g000577	Nodulin-like domain-containing protein	---	61.744	3.7	4	1	1	0	0	0	0	0	0	0	0	0	0	0	0	0	0	0	0	0	0	0	0	0	0	4959	0
Capana00g000584	heat shock factor-binding protein 1-like	---	11.388	26.7	30	2	2	0	0	0	0	0	0	0	0	0	0	0	0	0	0	0	0	0	0	0	0	0	0	0	117170
Capana00g000598	Y5126_ARATH Probable serine/threonine-protein kinase At5g41260 OS=Arabidopsis thaliana GN=At5g41260 PE=1 SV=1	At5g41260	12.356	10.1	18	1	1	0	0	0	0	0	0	0	0	0	0	0	0	0	0	0	0	0	0	0	0	0	0	0	19482
Capana00g000606	ODO1_DICDI 2-oxoglutarate dehydrogenase, mitochondrial OS=Dictyostelium discoideum GN=ogdh PE=3 SV=1	ogdh	67.818	35.7	167	14	10	752140	738510	702090	630390	649410	599740	851350	864460	832020	806240	778610	771960	638520	664070	661330	769340	755600	765870	853380	843810	845210	329850	338530	367640
Capana00g000608	Y5126_ARATH Probable serine/threonine-protein kinase At5g41260 OS=Arabidopsis thaliana GN=At5g41260 PE=1 SV=1	At5g41260	11.519	17.6	46	1	1	50492	54127	58682	55710	65407	58413	59999	59179	59668	48018	47486	46901	68268	61927	61513	53137	60193	58742	53739	55118	52953	41459	42259	40102
Capana00g000625	S-adenosyl-L-methionine-dependent methyltransferases superfamily protein	---	26.726	32.9	115	5	5	337170	335910	365150	354150	345090	349090	336490	333760	343880	331470	323830	334960	288320	275500	279500	325350	304320	279120	269220	276490	251000	405300	402790	366440
Capana00g000627	QORH_ARATH Putative quinone-oxidoreductase homolog, chloroplastic OS=Arabidopsis thaliana GN=At4g13010 PE=2 SV=1	At4g13010	32.969	29.6	98	6	2	606400	574730	577210	545550	589590	559800	663260	610490	602060	813200	830390	834600	302720	279530	290040	229700	279640	291700	284300	275930	261820	469920	503290	501030
Capana00g000647	Putative ovule protein	---	138.18	1	24	1	1	0	0	0	0	0	0	0	0	0	0	0	0	0	0	0	0	0	0	0	0	0	0	0	1227500
Capana00g000652	RBL_GOSBA Ribulose bisphosphate carboxylase large chain OS=Gossypium barbadense GN=rbcL PE=3 SV=1	rbcL	11.342	34.6	1	2	1	0	0	0	0	0	0	0	0	0	0	0	0	0	0	0	0	13420	0	0	0	0	0	0	0
Capana00g000681	SUBL_ARATH Subtilisin-like protease OS=Arabidopsis thaliana GN=ARA12 PE=1 SV=1	ARA12	51.777	31	108	10	5	700810	779360	770740	795940	844670	795590	622130	647550	724710	761050	746990	744090	815200	799390	784040	656850	622470	639180	710250	623690	684170	700590	663050	657050
Capana00g000743	YKT61_ARATH VAMP-like protein YKT61 OS=Arabidopsis thaliana GN=YKT61 PE=2 SV=1	YKT61	21.558	33.5	44	3	3	79798	111300	0	119370	101030	102270	61914	64874	65699	45117	45270	0	40224	79071	85371	64773	83476	68594	36951	44153	30007	0	99612	125530
Capana00g000771	ATPI_TOBAC ATP synthase subunit a, chloroplastic OS=Nicotiana tabacum GN=atpI PE=3 SV=1	atpI	17.612	16	12	2	2	0	0	0	0	0	228710	0	0	0	0	0	0	0	0	0	0	0	0	0	0	0	265220	450590	0
Capana00g000816	AP1M1_HUMAN AP-1 complex subunit mu-1 OS=Homo sapiens GN=AP1M1 PE=1 SV=3	AP1M1	48.884	25.6	76	8	3	155010	142190	143310	151250	152730	153920	87994	96105	95645	77779	67645	78651	121280	114780	122950	108040	106710	98234	82947	86905	87879	35932	57930	67545
Capana00g000820	EIF2D_RABIT Eukaryotic translation initiation factor 2D OS=Oryctolagus cuniculus GN=EIF2D PE=1 SV=1	EIF2D	66.749	13	61	5	5	131530	113080	121580	115260	101230	95966	139140	123990	136160	107780	103920	93716	113920	123630	105170	122580	114650	105970	136180	134910	151310	49781	54106	57864
Capana00g000843	REFP2_MOUSE RNA and export factor-binding protein 2 OS=Mus musculus GN=Refbp2 PE=1 SV=1	Refbp2	26.796	29.2	42	6	6	160230	153960	196680	209820	148090	193360	186740	139560	132490	190410	148820	253370	151230	163620	124240	93536	143970	152380	165870	170670	179210	219120	168190	189960
Capana00g000844	GYP1_SCHPO GTPase-activating protein gyp1 OS=Schizosaccharomyces pombe (strain 972 / ATCC 24843) GN=gyp1 PE=2 SV=1	gyp1	35.16	13.2	21	3	3	0	0	57762	0	47065	52807	43953	40265	0	39244	44293	0	21990	54555	0	24760	0	26976	32190	0	19571	0	18449	0
Capana00g000867	GDL46_ARATH GDSL esterase/lipase At2g38180 OS=Arabidopsis thaliana GN=At2g38180 PE=2 SV=1	At2g38180	16.119	46.1	37	4	3	308780	323470	240660	298740	312890	350000	308290	294510	328630	269050	290620	282980	241610	174330	0	0	0	202550	203810	122400	161150	287920	293710	269240
Capana00g000868	PEX22_ARATH Peroxisome biogenesis protein 22 OS=Arabidopsis thaliana GN=PEX22 PE=1 SV=1	PEX22	30.148	26.5	76	4	3	120070	132800	134500	132050	116760	134660	117510	108200	111600	123220	129790	120730	106940	105850	104940	96074	93838	105700	80417	83724	73761	121990	126750	128500
Capana00g000870	ERGI3_DANRE Endoplasmic reticulum-Golgi intermediate compartment protein 3 OS=Danio rerio GN=ergic3 PE=2 SV=1	ergic3	37.328	12.5	25	2	2	0	0	25871	31606	47715	0	25399	20042	24208	0	0	0	0	46144	45355	0	41033	27646	0	25204	0	48858	39028	0
Capana00g000871	PSB6_TOBAC Proteasome subunit beta type-6 OS=Nicotiana tabacum PE=2 SV=1	---	10.852	12	17	1	1	0	0	0	0	0	0	0	0	0	0	0	0	0	0	0	0	0	0	0	0	0	0	0	105640
Capana00g000875	GLGB2_ARATH 1,4-alpha-glucan-branching enzyme 2-2, chloroplastic/amyloplastic OS=Arabidopsis thaliana GN=SBE2.2 PE=1 SV=1	SBE2.2	88.008	28.7	258	18	18	1333500	1374100	1422600	951510	907930	935760	2095700	2065700	2119300	1306400	1261400	1263700	1007600	969020	1025700	1467300	1563900	1543700	1719600	1778800	1735200	433310	447440	456450
Capana00g000880	UREG_SCHPO Uncharacterized urease accessory protein ureG-like OS=Schizosaccharomyces pombe (strain 972 / ATCC 24843) GN=SPCPB16A4.05c PE=2 SV=1	SPCPB16A4.05c	27.702	57.9	113	9	9	551210	581370	549230	538330	528420	523630	638050	597460	632050	458030	514890	531950	498390	484150	533320	550270	498270	519600	497710	501520	480400	378100	420020	402960
Capana00g000900	ADT1_SOLTU ADP,ATP carrier protein, mitochondrial OS=Solanum tuberosum GN=ANT PE=2 SV=1	ANT	41.796	29	232	11	7	3862400	3981500	4309600	4751000	4865100	5151700	4898300	4580300	4846100	3910400	3930200	4130600	5395900	5050800	5213400	4466600	4667000	4805600	3622300	3831900	4022900	7807000	7297500	7145400
Capana00g000926	NAD(P)-bd_dom domain-containing protein	---	12.927	18.6	24	1	1	0	0	0	0	0	0	0	0	0	0	0	0	0	0	0	0	0	0	0	0	0	0	0	189130
Capana00g000927	NAD(P)-bd_dom domain-containing protein	---	12.143	37	41	2	2	288290	288140	278100	281080	270880	282990	305280	306680	311110	320450	312270	323840	296250	300760	317150	342030	331030	325360	384650	359600	394390	369100	413740	419280
Capana00g000937	YZR3_ARATH RanBP2-type zinc finger protein At1g67325 OS=Arabidopsis thaliana GN=At1g67325 PE=1 SV=1	At1g67325	33.841	12.5	55	4	4	201210	222370	201100	213090	210750	209140	145030	150240	199850	191600	203030	168340	202710	197630	203900	224380	218850	207640	195320	184190	202570	236540	245990	253700
Capana00g000943	RHMA_ECOL5 2-keto-3-deoxy-L-rhamnonate aldolase OS=Escherichia coli O6:K15:H31 (strain 536 / UPEC) GN=rhmA PE=3 SV=1	rhmA	37.255	27.3	99	6	6	575260	584320	597820	542750	531610	529100	687370	645970	708150	743880	722460	647340	673910	650060	661710	621660	661830	661950	748850	712080	788110	590910	635480	666250
Capana00g000951	RS16_SPHWW 30S ribosomal protein S16 OS=Sphingomonas wittichii (strain RW1 / DSM 6014 / JCM 10273) GN=rpsP PE=3 SV=1	rpsP	12.728	13.3	17	1	1	0	0	0	0	0	0	0	0	0	0	0	0	0	0	0	0	0	0	0	0	0	0	0	33854
Capana00g000960	THO complex subunit 2	---	51.709	8.1	10	2	1	0	0	0	0	0	0	0	0	0	0	0	0	0	0	0	0	0	0	0	0	0	0	4812	0
Capana00g000979	SCP29_ARATH Serine carboxypeptidase-like 29 OS=Arabidopsis thaliana GN=SCPL29 PE=2 SV=1	SCPL29	47.945	25.5	88	7	4	80879	84091	86139	112720	111870	103960	65655	81755	75221	143240	139260	147070	120340	119750	123200	103090	121600	108620	108300	111050	110730	208330	219720	220330
Capana00g000980	FKB42_ARATH Peptidyl-prolyl cis-trans isomerase FKBP42 OS=Arabidopsis thaliana GN=FKBP42 PE=1 SV=1	FKBP42	21.082	11.1	5	1	1	0	0	0	0	0	0	0	0	0	0	0	0	0	0	0	0	0	0	0	4088.4	0	0	0	0
Capana00g000984	DNJC3_DICDI DnaJ homolog subfamily C member 3 homolog OS=Dictyostelium discoideum GN=dnajc3 PE=3 SV=1	dnajc3	48.363	25.4	72	8	8	187990	149290	153710	174530	148430	152180	162690	145000	145020	145610	141650	134700	143370	153830	158840	159370	183480	165050	156820	172560	174460	188530	148790	171910
Capana00g000988	P4KA1_ARATH Phosphatidylinositol 4-kinase alpha OS=Arabidopsis thaliana GN=PI4KALPHA1 PE=1 SV=2	PI4KALPHA1	70.664	10.7	35	4	4	56013	50491	46959	46413	44267	43579	48391	55996	48489	33729	34724	34240	33695	40569	44412	51458	55182	47799	40778	44311	41212	0	0	0
Capana00g000989	P4KA1_ARATH Phosphatidylinositol 4-kinase alpha OS=Arabidopsis thaliana GN=PI4KALPHA1 PE=1 SV=2	PI4KALPHA1	66.609	15	34	6	6	63205	66273	59742	52452	50065	54355	55204	65025	56332	34801	50609	35932	45937	47466	42388	55085	50758	56899	54443	43143	52204	0	0	0
Capana00g000996	DHX8_ARATH Probable pre-mRNA-splicing factor ATP-dependent RNA helicase OS=Arabidopsis thaliana GN=At3g26560 PE=1 SV=2	At3g26560	135.31	4.6	22	4	4	37775	38527	26252	22889	30938	17590	28199	0	30707	0	25157	28610	32644	39911	25025	0	28103	24698	29786	58216	57177	0	0	0
Capana00g001018	SIR_SYNY3 Sulfite reductase [ferredoxin] OS=Synechocystis sp. (strain PCC 6803 / Kazusa) GN=sir PE=1 SV=1	sir	77.469	46.1	411	22	21	3637500	3499400	3517000	3481700	3406200	3539000	3712600	3693600	3646900	3147200	3155500	3156100	3236500	3325400	3215900	3103300	3022800	3107800	2920500	3042700	2808200	1771200	1648700	1845500
Capana00g001019	ARID6_ARATH AT-rich interactive domain-containing protein 6 OS=Arabidopsis thaliana GN=ARID6 PE=2 SV=1	ARID6	39.855	8.1	14	2	2	0	0	24592	0	17794	14115	0	0	14634	0	0	0	0	0	18285	21769	22798	0	0	0	0	0	0	0
Capana00g001030	BCAL2_ARATH Branched-chain-amino-acid aminotransferase-like protein 2 OS=Arabidopsis thaliana GN=At5g27410 PE=2 SV=1	At5g27410	57.202	3.2	0	1	1	0	0	0	0	0	0	0	0	0	0	0	0	0	0	0	0	0	0	0	0	0	0	0	0
Capana00g001032	Usp domain-containing protein	---	25.935	41.6	127	8	6	258510	304560	303600	300820	306200	314120	319950	312810	316580	340710	343600	344860	353310	357960	359250	350190	349420	339640	406480	407390	405830	371530	359290	380210
Capana00g001061	BRX1_BOVIN Ribosome biogenesis protein BRX1 homolog OS=Bos taurus GN=BRIX1 PE=2 SV=1	BRIX1	22.52	13.9	3	2	2	0	0	0	0	0	0	0	0	0	0	0	0	0	0	0	0	8863.2	0	0	0	0	0	0	0
Capana00g001071	SF3B4_RAT Splicing factor 3B subunit 4 OS=Rattus norvegicus GN=Sf3b4 PE=2 SV=1	Sf3b4	39.445	24.3	66	6	6	129990	122720	136830	163880	139960	172300	112040	118980	131080	203190	212780	192000	136690	149590	149380	115620	132950	146040	181370	155140	160060	347710	300310	278260
Capana00g001072	SYP61_ARATH Syntaxin-61 OS=Arabidopsis thaliana GN=SYP61 PE=1 SV=1	SYP61	28.087	23.1	32	4	4	123960	118500	128280	118290	116430	104570	107700	107240	96855	108420	141760	122910	114070	115430	122740	132770	124590	111110	107380	119490	105350	100610	117570	107590
Capana00g001080	FIS1_YARLI Mitochondria fission 1 protein OS=Yarrowia lipolytica (strain CLIB 122 / E 150) GN=FIS1 PE=3 SV=2	FIS1	18.568	16.5	12	2	2	0	0	0	0	0	0	0	0	0	0	0	0	0	0	0	0	0	0	0	0	0	0	0	9534.7
Capana00g001096	G3PC_PETHY Glyceraldehyde-3-phosphate dehydrogenase, cytosolic OS=Petunia hybrida GN=GAPC PE=2 SV=1	GAPC	30.443	54.7	199	10	6	2667900	2809600	3026000	3186000	3152500	3204400	3008200	2911000	2898700	3067700	2748500	3009500	3034300	2912000	3099000	2666500	2798200	2856600	2576000	2782100	2905200	3078600	2949200	2854900
Capana00g001145	coiled-coil domain-containing protein SCD2 isoform X1	---	62.622	6	7	2	2	0	19898	0	0	0	0	0	0	0	0	0	17698	0	0	0	0	13463	0	0	0	14185	0	0	0
Capana00g001150	CIPK3_ARATH CBL-interacting serine/threonine-protein kinase 3 OS=Arabidopsis thaliana GN=CIPK3 PE=1 SV=2	CIPK3	42.845	10.4	5	3	1	0	0	0	0	0	0	0	0	0	0	0	0	0	0	0	0	0	0	12253	0	0	0	0	0
Capana00g001154	PSBB_TOBAC Photosystem II CP47 chlorophyll apoprotein OS=Nicotiana tabacum GN=psbB PE=3 SV=1	psbB	56.014	37.8	361	16	11	16725000	16757000	16558000	17775000	16971000	16811000	15628000	16442000	16343000	16640000	16055000	16617000	21106000	20887000	21289000	19912000	18942000	19561000	14584000	14844000	14467000	25573000	27961000	27718000
Capana00g001165	Putative ovule protein	---	44.664	6.2	6	1	1	0	0	0	0	0	0	0	0	0	0	0	0	0	0	0	0	0	0	0	0	9997.3	0	0	0
Capana00g001173	PPR91_ARATH Pentatricopeptide repeat-containing protein At1g62670, mitochondrial OS=Arabidopsis thaliana GN=At1g62670 PE=2 SV=2	At1g62670	62.655	2.9	1	1	1	0	0	0	0	0	0	0	0	0	0	0	0	0	0	0	0	0	0	0	0	0	0	0	146540
Capana00g001204	USPAL_ARATH Universal stress protein A-like protein OS=Arabidopsis thaliana GN=At3g01520 PE=1 SV=2	At3g01520	18.089	17.1	20	2	2	24482	0	20127	22453	22862	0	31018	0	46044	32683	46623	32266	0	10339	0	0	0	0	0	0	0	0	0	0
Capana00g001211	PSBA_VIGUN Photosystem Q(B) protein OS=Vigna unguiculata GN=psbA PE=3 SV=1	psbA	16.039	14.2	60	3	2	2064400	1817300	2250500	2427400	2203700	2182600	1980100	1991700	2091200	1662300	1992800	1885300	2951700	2763600	2821400	3009500	2798100	2351700	1798400	1909000	2113300	5111900	4636900	4375100
Capana00g001213	PSBP_SOLLC Oxygen-evolving enhancer protein 2, chloroplastic OS=Solanum lycopersicum GN=PSBP PE=2 SV=1	PSBP	28.036	62.3	382	17	15	14116000	14725000	18642000	16668000	18239000	18685000	23692000	20748000	20627000	24208000	24005000	23309000	20834000	20755000	21083000	16199000	18247000	20291000	19964000	21565000	21228000	33081000	31076000	27941000
Capana00g001216	WIT2_ARATH WPP domain-interacting tail-anchored protein 2 OS=Arabidopsis thaliana GN=WIT2 PE=1 SV=1	WIT2	84.195	29.5	144	17	17	178880	158680	146880	134160	134010	142460	280950	276310	298060	195170	200580	183700	181920	188630	190500	226740	224240	232730	358440	367210	366520	98095	86480	100970
Capana00g001217	early endosome antigen 1	---	27.858	40.7	33	6	5	94288	108040	82075	119710	100870	80816	184640	202910	124810	135970	129170	58121	107880	133780	101370	114820	153550	117760	207500	238460	197610	51599	52380	76131
Capana00g001240	COG7_MOUSE Conserved oligomeric Golgi complex subunit 7 OS=Mus musculus GN=Cog7 PE=2 SV=1	Cog7	92.838	15.2	47	7	7	84146	74695	62244	54804	55544	53094	51511	43443	51910	33685	35170	43023	56205	40241	33703	63897	56567	54757	59261	58736	44532	0	0	21293
Capana00g001263	RK27_TOBAC 50S ribosomal protein L27, chloroplastic OS=Nicotiana tabacum GN=RPL27 PE=1 SV=1	RPL27	18.26	23.4	72	3	3	873200	872390	912400	956420	932530	961460	854270	913890	849670	560810	550880	545970	782050	783710	800380	786220	751880	771860	657080	645000	680900	539020	531140	521140
Capana00g001273	DPOA2_MOUSE DNA polymerase alpha subunit B OS=Mus musculus GN=Pola2 PE=1 SV=2	Pola2	14.333	14.1	10	1	1	0	0	0	0	0	0	0	0	0	0	0	0	0	0	0	0	0	0	0	0	0	0	0	14381
Capana00g001306	GLMM_THEPX Phosphoglucosamine mutase OS=Thermoanaerobacter sp. (strain X514) GN=glmM PE=3 SV=1	glmM	29.701	32.5	99	7	7	580830	553020	537460	516380	503300	527770	641470	639510	627860	500930	479840	483360	583920	569160	539840	610770	546330	518390	587410	564870	596220	299500	345070	325610
Capana00g001358	VOC domain-containing protein	---	16.946	63.8	115	6	6	509990	510510	532510	443470	484800	468420	596590	550360	555980	607850	583930	628190	466540	473500	483430	469210	467050	455730	473440	507520	534080	631830	509330	579710
Capana00g001364	MLH1_HUMAN DNA mismatch repair protein Mlh1 OS=Homo sapiens GN=MLH1 PE=1 SV=1	MLH1	81.786	4.7	1	2	2	0	0	0	0	0	0	0	0	0	0	0	0	0	0	0	0	0	0	0	0	0	0	0	569170
Capana00g001365	CAS_ARATH Calcium sensing receptor, chloroplastic OS=Arabidopsis thaliana GN=CAS PE=1 SV=1	CAS	42.194	41.3	456	12	12	9407400	9158100	8900600	9138100	9002600	8912000	8750200	8864700	8944300	6126900	6047500	6297700	9655500	9982200	9911400	10414000	9962000	9865600	7605100	7660800	7624300	9053300	9694800	9930500
Capana00g001388	COQ9_XENTR Ubiquinone biosynthesis protein COQ9, mitochondrial OS=Xenopus tropicalis GN=coq9 PE=2 SV=1	coq9	35.037	14.1	44	3	3	93482	71322	106300	80788	91959	85506	76754	93186	89670	96059	96217	84137	89555	92578	94744	76736	77413	83142	79502	87808	90607	105070	85289	79430
Capana00g001398	EF-hand domain-containing protein	---	18.411	22.8	58	2	2	149330	148700	109580	155540	165780	149770	167510	174070	178850	98019	96803	92443	174320	172070	171720	214910	212650	203470	175850	178880	169790	181880	191200	182180
Capana00g001417	PLPP_RAT Pyridoxal phosphate phosphatase OS=Rattus norvegicus GN=Pdxp PE=1 SV=2	Pdxp	32.533	27.9	67	7	5	243070	237070	281300	231390	218320	286440	287010	288390	256910	217390	235260	200620	274550	314870	280920	267450	270100	282300	220620	241380	239660	325420	330030	243150
Capana00g001427	Putative ovule protein (Fragment)	---	20.286	22.7	11	3	3	30941	0	25872	0	0	26322	23215	31391	0	0	0	22261	25567	24762	22900	22849	23162	0	28515	26536	21072	18806	0	0
Capana00g001433	RBL_LAVLA Ribulose bisphosphate carboxylase large chain (Fragment) OS=Lavandula lanata GN=rbcL PE=3 SV=1	rbcL	18.828	34.1	25	3	1	0	0	0	0	0	0	0	0	0	0	0	0	0	0	0	0	0	0	0	0	0	0	0	1095000
Capana00g001441	NCS_THLFG S-norcoclaurine synthase OS=Thalictrum flavum subsp. glaucum PE=1 SV=1	---	16.772	67.8	62	6	6	404420	406870	395350	540950	486720	458750	474170	617200	578590	729960	711280	700540	496040	518670	520290	304450	570800	521080	606270	589260	550160	758220	773400	876240
Capana00g001447	SRP72_DICDI Signal recognition particle 72 kDa protein homolog OS=Dictyostelium discoideum GN=srp72 PE=3 SV=1	srp72	15.129	13.2	8	1	1	0	0	0	0	0	0	0	0	0	0	0	0	0	0	0	0	0	0	0	0	0	0	36954	0
Capana00g001453	RK22_NICTO 50S ribosomal protein L22, chloroplastic OS=Nicotiana tomentosiformis GN=rpl22 PE=3 SV=1	rpl22	16.178	46.5	259	5	5	865620	841570	857380	944320	935800	953510	759700	735970	766630	606940	612640	593710	881940	877830	889140	814730	799860	782360	614670	608240	622630	824480	856210	854620
Capana00g001461	CYSKP_CAPAN Cysteine synthase, chloroplastic/chromoplastic OS=Capsicum annuum PE=2 SV=1	---	30.724	51.2	353	10	9	5254800	4895800	4883600	5229900	5316200	5426600	5962000	5826900	5908900	5866700	5813800	5867000	5239000	5083300	5296600	4550700	4442400	4837000	5269300	5353800	5427100	6052900	6013800	5735900
Capana00g001478	ANM15_ARATH Protein arginine N-methyltransferase 1.5 OS=Arabidopsis thaliana GN=PMRT15 PE=1 SV=2	PMRT15	73.898	33.3	112	11	11	247540	261390	223690	252920	279560	278880	129120	130790	157210	191040	159310	160490	222540	218110	214940	233360	204370	213080	168000	198300	146040	116050	145710	136500
Capana00g001480	XDH_CHICK Xanthine dehydrogenase/oxidase OS=Gallus gallus GN=XDH PE=1 SV=1	XDH	140.37	8.6	36	6	6	86071	55217	75140	62851	67543	55178	53426	44879	58971	40566	61091	49037	61356	73319	66140	71069	81004	80563	71672	77308	68343	38212	32363	0
Capana00g001494	DDB1_SOLLC DNA damage-binding protein 1 OS=Solanum lycopersicum GN=DDB1 PE=1 SV=1	DDB1	121.55	23	140	16	16	284370	254970	254270	228040	223990	242570	250300	246970	246020	248680	244150	262350	198720	208740	204890	229760	249240	234100	240370	260890	249970	94879	94385	93855
Capana00g001499	VA727_ARATH Vesicle-associated membrane protein 727 OS=Arabidopsis thaliana GN=VAMP727 PE=2 SV=1	VAMP727	27.17	14.2	21	2	2	71997	0	70583	77963	74481	76266	63983	57277	53890	20717	51916	51312	0	0	0	0	0	0	0	0	0	0	0	0
Capana00g001503	RD21A_ARATH Cysteine proteinase RD21a OS=Arabidopsis thaliana GN=RD21A PE=1 SV=1	RD21A	53.873	25.1	145	7	7	865830	898610	885000	1021700	1049800	999220	778860	825790	816920	1069800	1098400	1149400	796840	755590	788450	806830	754210	820620	713150	721070	706460	1379000	1424100	1376900
Capana00g001525	OEP80_ARATH Outer envelope protein 80, chloroplastic OS=Arabidopsis thaliana GN=OEP80 PE=1 SV=1	OEP80	75.714	22.9	102	10	10	358870	333380	316350	337130	297860	344630	315570	324260	321960	289740	279130	280730	276120	319870	303740	350700	324910	332420	309140	304850	291580	384450	368870	378100
Capana00g001528	VDAC4_ARATH Mitochondrial outer membrane protein porin 4 OS=Arabidopsis thaliana GN=VDAC4 PE=2 SV=1	VDAC4	30.948	41.8	105	9	9	329100	321350	307600	330580	346540	381790	368070	384680	359180	427180	401720	442030	343830	352920	323910	343870	338110	355720	303080	309900	334150	630270	610680	617010
Capana00g001529	RL72_ARATH 60S ribosomal protein L7-2 OS=Arabidopsis thaliana GN=RPL7B PE=1 SV=1	RPL7B	28.002	53.3	144	11	4	2157300	2402800	2305500	2304300	2256200	2310100	2114200	2112400	2094500	1960300	2005300	1968400	2181300	2257300	2199100	2253200	2289500	2378400	2095900	2127100	2131800	979770	1120900	1043100
Capana00g001539	protein RETICULATA-RELATED 1, chloroplastic-like	---	41.251	11.8	5	3	2	43181	0	0	0	48210	44044	0	0	0	0	0	0	0	0	0	0	0	0	0	0	0	0	0	0
Capana00g001540	AP2A2_ARATH AP-2 complex subunit alpha-2 OS=Arabidopsis thaliana GN=ALPHAC-AD PE=1 SV=1	ALPHAC-AD	114.66	23.2	28	15	6	81316	74380	52600	73345	62638	60400	66772	65718	77430	40710	55358	58212	67441	66228	63357	28333	50727	54669	64854	55920	71380	0	0	0
Capana00g001547	K0664_DANRE Protein KIAA0664 homolog OS=Danio rerio GN=zgc:152873 PE=2 SV=1	zgc:152873	59.958	18.4	57	7	6	135050	117200	124040	102970	107350	106260	112810	109070	96691	96860	86463	89557	74582	74013	79933	98502	93780	99124	115750	112130	105640	43727	45991	43281
Capana00g001596	TYRA2_ARATH Arogenate dehydrogenase 2, chloroplastic OS=Arabidopsis thaliana GN=TYRAAT2 PE=1 SV=1	TYRAAT2	41.2	9.9	29	3	3	19226	0	16628	0	26207	17488	0	13636	12847	15129	14102	20201	19153	19627	17960	19523	0	20622	23473	17896	17950	32382	19393	22370
Capana00g001616	TGA21_TOBAC TGACG-sequence-specific DNA-binding protein TGA-2.1 OS=Nicotiana tabacum GN=TGA21 PE=1 SV=1	TGA21	24.56	12.2	10	2	2	87915	89269	86818	65984	82181	82497	0	83661	80602	92885	72588	89766	81860	0	78774	103920	101730	85070	0	77737	93934	86751	100250	92756
Capana00g001626	EEA1_HUMAN Early endosome antigen 1 OS=Homo sapiens GN=EEA1 PE=1 SV=2	EEA1	59.011	18.2	88	7	7	176500	165560	164470	171210	162950	167030	161990	160100	163160	138180	140970	144310	155530	157640	171480	161300	155990	140440	114560	136870	131550	152230	152310	153370
Capana00g001653	SUBL_ARATH Subtilisin-like protease OS=Arabidopsis thaliana GN=ARA12 PE=1 SV=1	ARA12	78.855	28.6	223	16	14	1544100	1582300	1685800	1617900	1742300	1731600	1905400	1874100	1823800	1930700	1857800	1869100	455300	460980	449490	337200	342060	356690	392050	374860	394170	634360	619410	622830
Capana00g001661	ATPBM_NICPL ATP synthase subunit beta, mitochondrial OS=Nicotiana plumbaginifolia GN=ATPB PE=1 SV=1	ATPB	59.997	70.9	798	28	6	12753000	12853000	13582000	12962000	13104000	12902000	14636000	14641000	14840000	18118000	17627000	17390000	15443000	15613000	15825000	15095000	15475000	16143000	17228000	16990000	16997000	21170000	20668000	20367000
Capana00g001695	ODBB_RAT 2-oxoisovalerate dehydrogenase subunit beta, mitochondrial OS=Rattus norvegicus GN=Bckdhb PE=1 SV=3	Bckdhb	21.823	24.4	21	3	3	96418	80454	81842	118700	76254	64847	58967	72187	118450	0	55456	60929	116120	96754	113730	160250	65643	116900	98699	69408	67292	74104	0	88037
Capana00g001698	PSBC_SOLTU Photosystem II CP43 chlorophyll apoprotein OS=Solanum tuberosum GN=psbC PE=3 SV=1	psbC	34.728	44.5	481	13	13	19607000	20232000	19457000	22182000	21596000	21924000	19464000	19479000	19601000	17342000	18517000	17663000	22534000	22924000	22863000	20049000	20024000	20841000	16500000	16458000	16813000	32831000	31495000	31319000
Capana00g001712	PPR3_ARATH Pentatricopeptide repeat-containing protein At1g02150 OS=Arabidopsis thaliana GN=At1g02150 PE=2 SV=2	At1g02150	61.974	27.3	125	11	11	324090	332800	320690	301640	345510	316910	282800	288490	298200	237670	222570	232570	270350	253190	283550	266250	250730	257320	282740	282310	295150	109220	107470	107320
Capana00g001716	Putative PH-response transcription factor-like (Fragment)	---	36.442	56.1	209	12	12	708880	684410	625700	558660	533260	471630	689380	751090	781040	934690	946660	938550	700790	696610	691630	796300	817780	771500	955490	949690	885950	721520	745180	797500
Capana00g001727	RHIE_DICD3 Rhamnogalacturonate lyase OS=Dickeya dadantii (strain 3937) GN=rhiE PE=1 SV=1	rhiE	119.02	21.9	91	13	13	268890	276340	282790	284720	270350	288480	236610	274170	258220	277880	276930	304460	194140	191960	185270	184660	186500	169780	144810	166170	158610	196420	191330	207910
Capana00g001759	RM02_ORYSJ 60S ribosomal protein L2, mitochondrial OS=Oryza sativa subsp. japonica GN=RPL2 PE=2 SV=2	RPL2	15.395	38.2	14	4	3	20225	23997	15751	16237	15087	18605	11154	13235	13651	0	0	14318	13464	14414	0	16810	14402	0	14481	0	0	0	0	11424
Capana00g001766	BD31B_ORYSJ Protein BUD31 homolog 2 OS=Oryza sativa subsp. japonica GN=Os05g0446300 PE=2 SV=1	Os05g0446300	29.707	14.9	27	4	4	55951	62192	55309	58989	72577	64301	0	47556	51791	32291	44314	38743	50032	38165	42282	44365	0	59183	53552	43795	45169	67643	45125	65179
Capana00g001782	PGTA_HUMAN Geranylgeranyl transferase type-2 subunit alpha OS=Homo sapiens GN=RABGGTA PE=1 SV=2	RABGGTA	81.026	6.8	6	3	3	0	0	0	0	0	0	0	0	23658	0	0	0	0	0	0	0	0	22800	0	22147	0	0	0	0
Capana00g001830	H32_TOBAC Histone H3.2 OS=Nicotiana tabacum GN=B34 PE=1 SV=1	B34	13.152	35.7	0	2	1	0	0	0	0	0	0	0	0	0	0	0	0	0	0	0	0	0	0	0	0	0	0	0	0
Capana00g001853	ylmG homolog protein 1-1, chloroplastic-like	---	23.575	20.8	27	3	3	59805	53500	42574	63806	73929	66375	64024	65675	64892	95544	106880	0	55525	63409	62256	83623	93914	0	83742	89729	97693	109980	145100	137320
Capana00g001858	TNKS1_HUMAN Tankyrase-1 OS=Homo sapiens GN=TNKS PE=1 SV=2	TNKS	21.274	9	4	1	1	0	0	0	0	0	0	0	0	0	0	0	0	0	0	0	0	0	0	0	0	0	0	0	13797
Capana00g001862	CYPH_SOLLC Peptidyl-prolyl cis-trans isomerase OS=Solanum lycopersicum GN=CYP PE=2 SV=1	CYP	18.127	75	182	11	11	4476300	4121700	4246100	4650700	4457800	4661000	4030300	3777400	3876900	4261300	4640700	4287000	3717300	4043100	4283900	2984900	3044300	3258400	3526400	3388800	3472300	5626500	5496900	5634000
Capana00g001864	SSRA_ARATH Translocon-associated protein subunit alpha OS=Arabidopsis thaliana GN=At2g21160 PE=2 SV=3	At2g21160	27.93	25.6	42	3	3	105760	119000	125100	96962	112200	95460	105120	105680	112050	113690	101690	121080	174330	173710	179100	160110	144710	153600	153980	142780	180200	0	45562	47693
Capana00g001865	XCT_ORYSJ Protein XAP5 CIRCADIAN TIMEKEEPER OS=Oryza sativa subsp. japonica GN=XCT PE=2 SV=1	XCT	41.917	25.6	67	7	7	129260	108830	102540	103980	107310	104680	68772	87793	79817	130700	119350	124650	92371	92046	99095	104070	93189	84208	96318	101030	101870	112040	113910	129980
Capana00g001880	Y1223_SYNY3 Epimerase family protein slr1223 OS=Synechocystis sp. (strain PCC 6803 / Kazusa) GN=slr1223 PE=3 SV=2	slr1223	61.206	21.5	194	8	8	807960	883410	818840	928480	893910	909910	1048400	1066200	1026400	745600	761590	745730	903410	893650	983620	889500	977290	919000	883180	862480	855040	828150	860770	856620
Capana00g001883	PHT21_ARATH Inorganic phosphate transporter 2-1, chloroplastic OS=Arabidopsis thaliana GN=PHT2-1 PE=1 SV=1	PHT2-1	61.558	15.8	67	7	7	185630	181790	197710	206080	203360	218540	194020	203200	207840	109670	178390	194040	243880	234270	241870	192450	189720	206730	154930	143490	160540	274200	267490	267340
Capana00g001886	nuclear speckle splicing regulatory protein 1 isoform X3	---	67.428	2.1	6	1	1	0	0	0	0	0	0	0	0	0	0	0	0	0	0	0	0	0	0	0	0	0	0	0	6470.1
Capana00g001919	Y1181_ARATH Uncharacterized aarF domain-containing protein kinase At1g71810, chloroplastic OS=Arabidopsis thaliana GN=At1g71810 PE=1 SV=1	At1g71810	79.036	24.2	114	12	12	243370	224800	197430	195890	156860	202190	314050	319640	316090	181390	168530	167760	180420	145440	161300	208170	200310	202850	219750	192130	184510	55155	74363	51455
Capana00g001921	Y4967_ARATH Uncharacterized oxidoreductase At4g09670 OS=Arabidopsis thaliana GN=At4g09670 PE=1 SV=1	At4g09670	39.752	49.3	199	12	8	922050	868890	850500	864170	862640	881060	983550	1003400	962590	1069900	1034100	1050700	1336500	1344600	1295200	1325100	1337800	1327700	1399100	1350700	1395500	1450100	1419600	1408000
Capana00g001934	RIR1_ARATH Ribonucleoside-diphosphate reductase large subunit OS=Arabidopsis thaliana GN=RNR1 PE=1 SV=1	RNR1	85.738	13.5	31	6	6	77868	77860	76514	70611	68966	74483	39633	28193	41354	55809	47243	44603	28250	34931	28813	43973	49292	39718	42916	45930	42137	0	0	27978
Capana00g001939	DLD_ARATH D-lactate dehydrogenase [cytochrome], mitochondrial OS=Arabidopsis thaliana GN=DLD PE=1 SV=1	DLD	28.232	10	37	2	2	45524	48058	48118	47055	48235	52609	59178	54872	52573	36909	31172	35167	41312	48261	49779	59931	42266	57623	50725	54682	54608	39867	34746	33347
Capana00g001940	DLD_ARATH D-lactate dehydrogenase [cytochrome], mitochondrial OS=Arabidopsis thaliana GN=DLD PE=1 SV=1	DLD	16.942	33.6	13	2	2	36409	24287	30995	25059	23761	27150	25098	24344	29605	15552	0	0	0	0	20866	25006	23372	21511	20792	18373	21921	0	0	16986
Capana00g001942	ACCO3_PETHY 1-aminocyclopropane-1-carboxylate oxidase 3 OS=Petunia hybrida GN=ACO3 PE=3 SV=1	ACO3	36.33	27	20	4	3	16342	14224	16429	0	0	0	7655.6	8319.1	8678.8	0	0	0	53611	54863	61171	52383	25374	26158	36296	22673	34563	0	0	10692
Capana00g001947	HPSE3_ARATH Heparanase-like protein 3 OS=Arabidopsis thaliana GN=At5g34940 PE=2 SV=2	At5g34940	59.598	24.2	106	8	7	319070	296390	299390	342520	314700	299210	250140	253550	268420	279490	265020	267280	313350	320970	319150	301880	294210	294990	260540	242960	233470	395690	434090	429430
Capana00g001981	Nephrocystin-3 like	---	46.27	18.1	16	5	5	21115	32322	9448.2	21713	25109	0	22149	0	23202	21698	22600	23141	34807	23414	29397	18008	0	38835	38356	29044	29650	22716	24651	29869
Capana00g001990	AHM7_ARATH Putative copper-transporting ATPase 3 OS=Arabidopsis thaliana GN=HMA5 PE=2 SV=2	HMA5	102.44	6.3	34	4	4	0	95550	100960	101790	93857	83574	75372	111070	93156	68593	72444	71310	92591	77807	86813	150250	116250	100060	85897	82902	68464	0	51780	60735
Capana00g001996	J domain-containing protein	---	57.652	17.3	41	5	5	58488	67101	63040	66879	54074	38810	0	48477	37153	65490	53958	78602	55597	65324	42128	43931	19598	73249	37875	74536	69691	97447	104440	110220
Capana00g002001	BLC_CITFR Outer membrane lipoprotein blc OS=Citrobacter freundii PE=3 SV=1	---	21.314	37.3	142	5	3	2082200	1829700	1835800	1954700	1751400	1832900	2489100	2392800	2484100	3056100	3027800	2978300	1219500	1253700	1075000	886120	1097400	1090100	1477900	1449900	1317500	2207800	2114300	2070300
Capana00g002007	ACCH3_SOLLC 1-aminocyclopropane-1-carboxylate oxidase homolog OS=Solanum lycopersicum GN=ACO3 PE=2 SV=1	ACO3	41.324	38.9	185	11	10	620000	583860	596690	616150	586810	607210	484910	523260	481370	598820	640350	607450	672880	682790	701910	691840	640840	632990	615080	609580	578060	968660	999510	970730
Capana00g002009	ACCH3_SOLLC 1-aminocyclopropane-1-carboxylate oxidase homolog OS=Solanum lycopersicum GN=ACO3 PE=2 SV=1	ACO3	42.329	9.2	32	2	2	0	52203	59822	72572	69989	67010	46157	46512	65384	47330	50830	56970	73515	76696	83479	57676	52728	67841	65366	66320	49832	122360	76876	84875
Capana00g002066	Regulator of rDNA transcription protein 15	---	14.045	10.7	6	1	1	0	0	0	0	0	0	0	0	0	0	0	0	0	0	0	0	0	0	0	0	0	0	0	118270
Capana00g002075	UPL2_ARATH E3 ubiquitin-protein ligase UPL2 OS=Arabidopsis thaliana GN=UPL2 PE=1 SV=3	UPL2	130.18	9.7	64	8	8	114740	116760	110740	98474	97419	98884	138790	141070	155840	98045	106280	105940	73997	82677	92820	107710	123040	163720	141530	170670	152960	54845	84137	42309
Capana00g002076	UPL1_ARATH E3 ubiquitin-protein ligase UPL1 OS=Arabidopsis thaliana GN=UPL1 PE=1 SV=3	UPL1	290.39	9.2	126	15	14	270410	256660	250690	210840	225450	231740	276450	294910	290940	260790	244440	227120	204360	181510	192540	240510	217890	241320	362520	322100	345280	122300	163740	115660
Capana00g002089	PSBA_TOBAC Photosystem Q(B) protein OS=Nicotiana tabacum GN=psbA PE=3 SV=2	psbA	35.706	25.8	276	6	0	3308400	3273900	3096700	3858600	3624300	3657500	2715600	2653600	2670100	2298400	2471800	2540400	3719700	3838400	3766000	3595300	3203900	3151000	2260600	2222000	2279000	4511900	4582800	4854100
Capana00g002110	LACS7_ARATH Long chain acyl-CoA synthetase 7, peroxisomal OS=Arabidopsis thaliana GN=LACS7 PE=1 SV=2	LACS7	76.8	33.5	248	13	13	817640	778210	749220	771450	776670	791250	713130	707860	747980	669530	594480	589310	794990	707670	709440	768060	709760	665890	605730	610730	566520	336420	333710	383630
Capana00g002111	AMPP1_SORMK Probable Xaa-Pro aminopeptidase P OS=Sordaria macrospora (strain ATCC MYA-333 / DSM 997 / K(L3346) / K-hell) GN=AMPP PE=3 SV=1	AMPP	77.555	39.8	222	13	13	799870	782810	742280	775400	756830	761090	795380	803300	821200	706490	674650	689340	744650	763950	747390	772290	748830	746620	698090	654420	646050	504660	527050	515930
Capana00g002112	AXR4_ARATH Protein AUXIN RESPONSE 4 OS=Arabidopsis thaliana GN=AXR4 PE=1 SV=1	AXR4	53.454	6	14	2	2	0	20988	16059	26136	16398	20774	0	13060	0	0	0	0	0	22155	0	0	0	13142	15907	0	0	18117	23517	18503
Capana00g002121	P2C35_ARATH Probable protein phosphatase 2C 35 OS=Arabidopsis thaliana GN=At3g06270 PE=2 SV=1	At3g06270	38.566	19.7	4	4	4	0	56217	0	0	0	0	0	0	0	0	0	0	0	0	0	22235	0	0	0	67097	0	0	0	0
Capana00g002133	NACA2_ARATH Nascent polypeptide-associated complex subunit alpha-like protein 2 OS=Arabidopsis thaliana GN=At3g49470 PE=2 SV=2	At3g49470	22.507	59.5	152	10	10	1406900	1361500	1376100	1296200	1350600	1314800	1129400	1222500	1285600	1099500	1049400	1020000	1667700	1625500	1634100	1608900	1504600	1565800	1987800	1961500	1922600	1032700	828150	814480
Capana00g002157	FURH_VIBFR Furcatin hydrolase OS=Viburnum furcatum PE=1 SV=1	---	47.429	19	99	6	6	213350	179400	185380	149780	173560	176560	248700	234780	236260	282770	283680	280720	251340	249460	251780	240730	257960	255560	289890	284090	308290	136690	116280	151260
Capana00g002159	Y0111_DICDI Probable serine/threonine-protein kinase DDB_G0280111 OS=Dictyostelium discoideum GN=DDB_G0280111 PE=3 SV=1	DDB_G0280111	77.582	13.3	25	5	5	79913	58352	56497	53371	26429	52559	0	0	33539	30727	67548	40259	41980	56719	40081	60920	76723	53239	0	27569	24757	134700	57276	57619
Capana00g002164	GSTXA_TOBAC Probable glutathione S-transferase parA OS=Nicotiana tabacum GN=PARA PE=2 SV=1	PARA	26	9.3	17	3	1	0	0	0	0	0	0	0	0	0	0	0	0	0	0	0	0	0	0	0	0	0	0	0	42314
Capana00g002177	PERX_SOLTU Suberization-associated anionic peroxidase OS=Solanum tuberosum PE=2 SV=2	---	38.573	17.8	28	3	3	1191300	954790	999890	1057400	985220	1141600	1040400	1275600	829230	1415400	1715100	1535000	834360	895740	934240	1017900	1107600	859550	1099200	997180	977150	1250200	1726300	1307300
Capana00g002180	PPR51_ARATH Pentatricopeptide repeat-containing protein At1g19525 OS=Arabidopsis thaliana GN=At1g19525 PE=2 SV=2	At1g19525	81.413	5.7	10	3	3	0	37864	0	0	29944	0	52057	0	0	0	0	35916	26072	38197	37467	0	36959	0	37629	36134	0	0	0	0
Capana00g002182	DHLA_XANFL Haloalkane dehalogenase OS=Xanthobacter flavus GN=dhlA PE=3 SV=1	dhlA	42.34	51	303	13	13	2667200	2511100	2272400	2439900	2186300	2362600	2453700	2496000	2548800	2066300	1924100	2051600	2281700	2299600	2346900	2467900	2349400	2447400	1962500	2028000	1835200	2204900	2247600	2246600
Capana00g002189	MBD10_ARATH Methyl-CpG-binding domain-containing protein 10 OS=Arabidopsis thaliana GN=MBD10 PE=1 SV=1	MBD10	33.214	31.3	78	6	6	628290	563470	596110	512570	547590	530880	634540	657840	654620	957880	890880	962620	697520	635950	683870	784180	762240	696910	877780	805430	762750	731210	766050	808350
Capana00g002203	SUBL_ARATH Subtilisin-like protease OS=Arabidopsis thaliana GN=ARA12 PE=1 SV=1	ARA12	85.149	27.8	60	16	5	163290	156380	163680	136440	168400	154880	150950	126000	132940	125110	134620	140140	192470	184390	220550	186470	147130	175350	141290	148860	140660	64854	71553	85114
Capana00g002205	PROL_ARATH Protein PROLIFERA OS=Arabidopsis thaliana GN=PRL PE=1 SV=2	PRL	80.846	9.7	24	5	5	32072	34268	29031	39778	39156	46350	0	0	0	71734	67750	58319	17711	19460	0	37881	36390	46953	55138	62122	76401	0	27126	18397
Capana00g002216	PARP1_ARATH Poly [ADP-ribose] polymerase 1 OS=Arabidopsis thaliana GN=PARP1 PE=1 SV=2	PARP1	111.29	8.5	21	5	4	201960	188300	163280	131180	121830	130810	0	134500	137700	137220	147510	149590	112490	0	0	205120	0	165790	153420	0	0	0	0	0
Capana00g002223	LOR15_ARATH Protein LURP-one-related 15 OS=Arabidopsis thaliana GN=At5g01750 PE=1 SV=1	At5g01750	23.372	26.4	61	4	4	128510	120350	118840	123620	121640	128660	85957	90812	89947	78554	85636	83486	124270	126460	117950	112900	101900	98675	72810	61878	67167	105220	114440	120300
Capana00g002239	SYP22_ARATH Syntaxin-22 OS=Arabidopsis thaliana GN=SYP22 PE=1 SV=1	SYP22	28.389	21.8	25	3	1	70347	68065	81548	0	76607	70242	61807	73982	77163	64517	67777	89571	74006	68830	75211	71443	76787	73150	62919	69857	70900	44557	58582	56591
Capana00g002241	VIPI_SCHPO Protein vip1 OS=Schizosaccharomyces pombe (strain 972 / ATCC 24843) GN=vip1 PE=1 SV=1	vip1	31.877	12.9	16	3	3	0	26634	25943	30450	22029	27123	22035	0	26447	0	22499	23159	23443	0	39118	26398	25986	16953	22635	34498	33355	0	45382	46098
Capana00g002245	PAB2_SCHPO Polyadenylate-binding protein 2 OS=Schizosaccharomyces pombe (strain 972 / ATCC 24843) GN=pab2 PE=2 SV=1	pab2	14.352	21.8	20	1	1	60719	61437	55821	53829	0	0	0	0	0	0	52040	0	0	0	0	57755	63881	47488	91181	0	0	0	0	0
Capana00g002249	AGD14_ARATH Probable ADP-ribosylation factor GTPase-activating protein AGD14 OS=Arabidopsis thaliana GN=AGD14 PE=1 SV=2	AGD14	72.104	14.6	64	5	5	111320	124590	127930	126300	126090	138400	99648	103050	116870	119370	105080	110740	140080	140720	124140	110720	123790	108730	110370	103730	108740	86807	97194	115460
Capana00g002254	PESC_CHLRE Pescadillo homolog OS=Chlamydomonas reinhardtii GN=CHLREDRAFT_206018 PE=3 SV=1	CHLREDRAFT_206018	65.265	7.2	13	2	2	51444	48243	43331	19911	0	0	0	31757	32348	0	28707	27622	20822	22828	0	0	0	28707	65441	32913	44372	0	0	0
Capana00g002259	IDH1_ARATH Isocitrate dehydrogenase [NAD] regulatory subunit 1, mitochondrial OS=Arabidopsis thaliana GN=IDH1 PE=1 SV=2	IDH1	34.602	39.4	180	10	9	1590700	1566400	1583200	1621000	1730500	1727900	1679600	1693500	1700800	1889400	1778700	1761100	1429500	1458100	1482500	1377100	1461400	1527300	1256500	1361900	1306600	1993200	1974100	1945900
Capana00g002264	AB hydrolase-1 domain-containing protein	---	39.494	37.8	105	8	8	147830	215640	262650	186430	194840	198620	231900	203200	217230	140720	141490	159320	392630	390610	422310	436380	424310	417590	341910	354710	360160	242810	289370	260820
Capana00g002266	AB hydrolase-1 domain-containing protein	---	41.637	33.2	102	7	7	159990	166930	142480	176000	182370	179510	136690	141260	134360	104980	131650	106520	159190	157640	126200	155420	160140	161940	151150	149210	137250	135420	124110	147180
Capana00g002279	GDL15_ARATH GDSL esterase/lipase At1g29670 OS=Arabidopsis thaliana GN=At1g29670 PE=2 SV=1	At1g29670	47.35	41.3	117	10	8	365180	375900	375220	386920	393370	385530	288860	256910	248160	347280	330370	369900	315790	296420	337040	156740	193010	204030	165880	188530	178350	470970	398520	416090
Capana00g002281	GDL82_ARATH GDSL esterase/lipase At5g45670 OS=Arabidopsis thaliana GN=At5g45670 PE=2 SV=1	At5g45670	41.212	46.1	60	10	8	288740	195920	226210	239000	233850	240880	82503	119130	105790	222190	181220	216790	160960	131450	163690	82048	165270	118800	131020	126750	124740	309790	350610	385810
Capana00g002296	ADIP_HUMAN Afadin- and alpha-actinin-binding protein OS=Homo sapiens GN=SSX2IP PE=1 SV=3	SSX2IP	41.624	3.3	13	1	1	0	0	0	0	0	0	0	0	0	0	0	0	0	0	0	0	0	0	0	0	19314	0	0	0
Capana00g002300	APGM_METM7 2,3-bisphosphoglycerate-independent phosphoglycerate mutase OS=Methanococcus maripaludis (strain C7 / ATCC BAA-1331) GN=apgM PE=3 SV=1	apgM	60.168	23.1	146	9	9	206750	213110	186010	189420	192460	188320	173660	181710	175470	161550	153610	158500	216920	209380	212480	204370	192490	216130	199170	184900	192330	232960	217320	224840
Capana00g002328	Putative calcium-dependent phosphotriesterase superfamily protein-like	---	21.18	8.2	11	1	1	0	0	0	0	0	0	0	0	0	0	0	0	0	0	0	0	0	0	0	0	0	0	0	32360
Capana00g002331	COAD_ARATH Phosphopantetheine adenylyltransferase OS=Arabidopsis thaliana GN=COAD PE=1 SV=1	COAD	20.044	19.8	16	3	3	36544	47603	35943	43023	0	39186	58251	43240	63452	40909	43404	54634	0	34574	0	26934	25148	0	27238	31942	34094	0	28294	39399
Capana00g002333	SUBL_ARATH Subtilisin-like protease OS=Arabidopsis thaliana GN=ARA12 PE=1 SV=1	ARA12	38.493	17.2	9	4	2	0	0	0	0	0	0	0	0	0	0	0	0	0	0	0	0	0	0	0	0	0	0	0	38952
Capana00g002370	R1B16_SOLDE Putative late blight resistance protein homolog R1B-16 OS=Solanum demissum GN=R1B-16 PE=3 SV=1	R1B-16	102.61	3.7	37	2	2	851190	954380	0	841640	833020	752720	781970	729400	823230	651120	594160	662410	714160	731820	748470	0	589830	553210	658530	595860	587380	270780	303590	299620
Capana00g002374	PIN3_ARATH Auxin efflux carrier component 3 OS=Arabidopsis thaliana GN=PIN3 PE=1 SV=1	PIN3	71.17	19.1	68	7	6	151890	196650	119650	140160	133230	116790	56527	89410	124140	96489	116250	107940	135220	123590	73072	162470	145800	171390	129910	117310	158170	101000	125460	127450
Capana00g002376	protein YLS9-like	---	29.188	10.8	19	2	2	0	0	0	0	0	0	0	0	0	82907	0	0	0	66920	66070	0	64978	0	68717	0	0	0	0	0
Capana00g002379	MBD10_ARATH Methyl-CpG-binding domain-containing protein 10 OS=Arabidopsis thaliana GN=MBD10 PE=1 SV=1	MBD10	53.159	61.4	270	22	22	547960	564640	497190	420350	377240	357370	775790	829100	863770	966480	969160	922340	548120	505530	524250	902510	834140	745870	1347900	1339500	1336500	457580	447050	423470
Capana00g002381	ATG7_ARATH Ubiquitin-like modifier-activating enzyme atg7 OS=Arabidopsis thaliana GN=ATG7 PE=1 SV=1	ATG7	77.911	11.1	42	4	4	345300	354710	383600	415230	363930	380440	385830	343310	326070	291810	332610	321810	300540	173260	278450	247870	272540	275170	279550	235930	272450	219960	187580	211290
Capana00g002390	SUCD_METS5 Succinate-semialdehyde dehydrogenase (acetylating) OS=Metallosphaera sedula (strain ATCC 51363 / DSM 5348) GN=Msed_1424 PE=1 SV=1	Msed_1424	39.569	40.6	107	10	10	263470	232410	227120	268920	239280	246590	217080	203050	207890	85390	89116	89545	279390	283570	290690	314730	290720	292270	226320	233130	237280	179600	191530	191420
Capana00g002392	OPI10_SCHPO Protein OPI10 homolog OS=Schizosaccharomyces pombe (strain 972 / ATCC 24843) GN=SPBC21H7.06c PE=2 SV=1	SPBC21H7.06c	20.739	16.6	21	2	2	0	0	32806	32811	31931	38729	24079	34784	28435	0	39085	39034	0	0	0	0	26394	35040	0	30574	30342	136080	52535	0
Capana00g002393	CDPK_SOYBN Calcium-dependent protein kinase SK5 OS=Glycine max PE=1 SV=1	---	56.076	37	145	13	11	366010	373730	374180	313470	301490	283250	331450	407650	390830	256890	252410	251160	244150	230730	248370	365120	373370	332710	346450	340500	354720	91124	78314	102590
Capana00g002394	PMTQ_ARATH Probable methyltransferase PMT26 OS=Arabidopsis thaliana GN=At5g64030 PE=1 SV=1	At5g64030	85.444	10.2	26	5	5	33917	43933	54407	52708	41805	52758	37578	34517	35606	35949	34846	37112	34890	44459	50064	44251	39209	40249	37209	44559	43228	91819	93589	96776
Capana00g002436	PSMD1_MOUSE 26S proteasome non-ATPase regulatory subunit 1 OS=Mus musculus GN=Psmd1 PE=1 SV=1	Psmd1	108.85	33.8	141	18	10	452850	381160	359190	311620	314340	302350	349000	363750	390390	334800	339150	337300	252540	265000	260660	388040	394540	339440	450950	401510	390960	90003	106250	130060
Capana00g002438	HERC4_MOUSE Probable E3 ubiquitin-protein ligase HERC4 OS=Mus musculus GN=Herc4 PE=2 SV=2	Herc4	41.544	34.9	116	7	7	226140	208780	216350	212060	198090	206540	167230	178300	158350	169240	163650	176660	223520	224420	202820	234510	242370	227350	209400	195150	205010	225070	250770	235230
Capana00g002444	AOC3_ARATH Allene oxide cyclase 3, chloroplastic OS=Arabidopsis thaliana GN=AOC3 PE=2 SV=1	AOC3	26.598	28.7	136	5	5	2145600	2229100	2231700	2433400	2356400	2340500	2174600	2154600	2184700	2750200	2682900	2685000	2230700	2153800	2226900	2477400	2453500	2508500	1986900	2074000	2033500	3118900	3180800	3160000
Capana00g002450	GGPP1_ARATH Heterodimeric geranylgeranyl pyrophosphate synthase large subunit 1, chloroplastic OS=Arabidopsis thaliana GN=GGPPS1 PE=1 SV=2	GGPPS1	40.495	7.3	6	2	2	0	0	0	0	0	0	0	0	0	0	7635	0	0	0	0	0	0	0	0	0	0	0	0	0
Capana00g002452	GGPPS_CATRO Geranylgeranyl pyrophosphate synthase, chloroplastic OS=Catharanthus roseus GN=GGPS1 PE=3 SV=1	GGPS1	39.164	9.1	10	3	3	56104	70313	73109	70110	60532	72493	47876	0	72104	0	0	0	67840	0	0	0	0	70552	0	0	0	85360	104950	0
Capana00g002459	SYST_SOLLC Systemin OS=Solanum lycopersicum PE=1 SV=1	---	21.916	53.7	178	10	10	1787900	1713200	1606000	1539300	1504900	1478400	1516500	1495300	1584900	1964300	1851200	1967800	1742600	1755200	1791000	1658900	1546100	1651500	1996700	1975100	1986900	1305500	1402700	1368400
Capana00g002479	RL141_ARATH 60S ribosomal protein L14-1 OS=Arabidopsis thaliana GN=RPL14A PE=2 SV=1	RPL14A	19.753	24.6	47	4	2	280490	366080	418900	471560	471460	532010	342870	352230	331420	309660	320320	299300	489200	470850	493480	309300	427650	441090	312720	280580	337760	433170	401640	423440
Capana00g002483	TRC_DROPS Serine/threonine-protein kinase tricorner OS=Drosophila pseudoobscura pseudoobscura GN=trc PE=3 SV=1	trc	52.477	8.1	6	3	2	7518.9	11179	0	0	10369	0	0	10619	0	0	0	0	0	0	0	0	0	0	0	0	0	0	0	0
Capana00g002485	AB19I_ARATH ABC transporter I family member 19 OS=Arabidopsis thaliana GN=ABCI19 PE=2 SV=1	ABCI19	32.245	10.5	14	1	1	0	0	0	0	0	0	0	0	0	0	0	0	0	0	0	0	0	0	0	0	0	0	0	65281
Capana00g002488	NADC_RHORU Probable nicotinate-nucleotide pyrophosphorylase [carboxylating] OS=Rhodospirillum rubrum GN=nadC PE=3 SV=1	nadC	38.28	33.4	116	8	8	307860	293300	294680	268640	269580	277180	301770	293260	260700	284140	277330	277460	319890	299470	328310	314640	330480	309260	342070	342840	311490	241900	206920	245740
Capana00g002500	COTA_BACSU Spore coat protein A OS=Bacillus subtilis GN=cotA PE=1 SV=4	cotA	63.397	7.6	10	2	2	19544	29015	24485	0	33763	29285	0	0	0	21554	15363	0	0	11826	0	0	0	0	0	0	0	0	0	0
Capana00g002515	Y1926_ARATH UPF0678 fatty acid-binding protein-like protein At1g79260 OS=Arabidopsis thaliana GN=At1g79260 PE=1 SV=1	At1g79260	18.126	45.1	64	5	5	187030	163030	178850	139670	134530	133220	140010	105760	155090	200930	165960	180030	128240	111960	108410	122480	113990	125880	121150	99091	122820	194430	229670	197730
Capana00g002531	CYPR1_CYNCA Cyprosin (Fragment) OS=Cynara cardunculus GN=CYPRO1 PE=1 SV=2	CYPRO1	55.32	37.6	205	14	14	2299100	2300300	2236100	2283800	2263000	2470400	2102800	2095100	1973500	2031500	2155900	2109500	2219400	2090800	2040400	1791900	1964800	1961800	1761000	1645600	1844300	3198900	2948900	3033000
Capana00g002542	PUS7_ORYSJ RNA pseudourine synthase 7 OS=Oryza sativa subsp. japonica GN=Os02g0512300 PE=2 SV=2	Os02g0512300	45.633	12.1	21	3	3	28050	28168	34188	35363	33274	34290	24177	26142	0	24967	24536	0	0	22190	25511	31924	25773	21608	21721	0	19470	0	0	19225
Capana00g002551	MOGS_MOUSE Mannosyl-oligosaccharide glucosidase OS=Mus musculus GN=Mogs PE=2 SV=1	Mogs	81.494	16.2	73	7	7	102090	130960	123070	122330	115430	116830	107550	115960	92680	119650	122320	132150	103740	90518	99054	82885	106350	96532	92960	76986	82167	33232	38732	0
Capana00g002602	APBLA_ARATH Beta-adaptin-like protein A OS=Arabidopsis thaliana GN=BETAA-AD PE=1 SV=1	BETAA-AD	94.457	25.4	106	13	13	262390	266130	269660	233880	231780	235550	231840	221870	224080	193910	159970	179500	210510	243720	225450	264440	277760	264310	247160	282750	266870	97765	77245	84198
Capana00g002604	Y2287_ARATH GTP-binding protein At2g22870 OS=Arabidopsis thaliana GN=EMB2001 PE=2 SV=2	EMB2001	24.126	16	32	2	2	53858	26327	23897	52169	41243	50132	28346	35335	29299	26937	33803	35158	26115	31613	30579	37639	29873	32628	39557	22609	27703	0	25096	0
Capana00g002624	LEU32_ARATH 3-isopropylmalate dehydrogenase 2, chloroplastic OS=Arabidopsis thaliana GN=IMDH2 PE=1 SV=1	IMDH2	43.496	37.2	194	11	11	1622200	1561500	1548200	1615800	1619300	1685400	1663300	1634000	1665900	1912500	1956100	1984800	1549100	1569500	1601100	1499500	1600100	1711100	1627800	1688500	1689300	2074800	2126600	2034800
Capana00g002642	CTP_transf_like domain-containing protein	---	39.484	29.2	56	7	7	142510	147890	153070	153680	143460	152500	116180	138810	132560	66103	107870	107820	111250	82355	94469	113860	101840	80049	78511	96748	67875	111320	99162	136180
Capana00g002646	integrator complex subunit 3 homolog	---	64.76	2.9	10	1	1	0	0	0	0	0	0	0	0	0	0	0	0	0	0	0	0	0	0	0	0	0	0	0	29102
Capana00g002648	LPP3_ARATH Putative lipid phosphate phosphatase 3, chloroplastic OS=Arabidopsis thaliana GN=LPP3 PE=2 SV=1	LPP3	20.679	20.4	12	2	2	0	0	0	0	0	0	0	0	0	0	0	0	0	0	0	0	0	0	0	0	0	0	183670	0
Capana00g002649	LPP2_ARATH Lipid phosphate phosphatase 2 OS=Arabidopsis thaliana GN=LPP2 PE=2 SV=1	LPP2	32.34	11.3	34	2	2	53928	57863	52203	60199	55321	53134	0	28828	0	43968	0	0	71731	63782	77325	73468	55809	41820	0	33471	44556	74496	96614	95030
Capana00g002686	NIR_BETPN Ferredoxin--nitrite reductase, chloroplastic OS=Betula pendula GN=NIR1 PE=2 SV=1	NIR1	56.869	28.3	28	11	5	90076	94709	95112	124330	103910	99746	133890	99251	83365	100830	61235	99732	100790	119060	102740	73814	85485	94824	89764	109400	84414	62301	0	75909
Capana00g002714	MCFB_DICDI Mitochondrial substrate carrier family protein B OS=Dictyostelium discoideum GN=mcfB PE=3 SV=1	mcfB	38.609	14.4	7	3	2	13355	0	17141	0	0	20594	13864	0	0	0	0	0	17911	0	21159	0	18308	0	0	0	11581	0	27520	0
Capana00g002719	NCLN_DANRE Nicalin-1 OS=Danio rerio GN=ncl1 PE=2 SV=1	ncl1	61.577	30.5	165	12	9	1006200	897140	937820	1145300	1030500	1031900	794800	757170	767780	853110	879910	890680	1148000	1084700	1011200	1015300	1070700	979070	794860	748170	781030	1421100	1470500	1460400
Capana00g002722	DCP1_ARATH mRNA-decapping enzyme-like protein OS=Arabidopsis thaliana GN=At1g08370 PE=2 SV=2	At1g08370	22.139	26	14	5	1	0	0	0	0	0	0	0	0	0	0	0	0	0	0	0	0	0	0	0	0	0	0	0	37503
Capana00g002729	CPNB4_ARATH Chaperonin 60 subunit beta 4, chloroplastic OS=Arabidopsis thaliana GN=CPN60B4 PE=1 SV=1	CPN60B4	62.35	11.8	68	5	5	111780	105120	114500	99414	106580	89441	95117	93422	101000	84317	83328	90010	93276	103470	92742	109130	91018	79747	94713	84702	87498	74338	62996	76028
Capana00g002731	6PGD_SYNE7 6-phosphogluconate dehydrogenase, decarboxylating OS=Synechococcus elongatus (strain PCC 7942) GN=gnd PE=1 SV=4	gnd	56.176	48.7	353	19	16	3029500	2937400	2819600	2895600	2854400	2780600	2660100	2731800	2832300	2391800	2311300	2406800	2760000	2718700	2788800	2994000	2800000	2735500	2544100	2502000	2474200	1720600	1839200	1852800
Capana00g002734	Putative trigger factor-like	---	29.19	23.1	58	4	4	163280	175930	166740	171730	165220	160640	125590	133710	135870	143470	157330	145860	179040	180210	175060	174280	163480	171410	145830	146960	141860	194870	218510	199400
Capana00g002735	RPB3A_ARATH DNA-directed RNA polymerase II subunit RPB3-A OS=Arabidopsis thaliana GN=RPB36A PE=2 SV=1	RPB36A	35.448	30.1	83	6	6	148730	142290	129220	117290	113080	115940	106250	108600	110350	150930	148930	151600	105040	101510	104200	120830	125550	118520	151320	149610	139310	76488	81609	81260
Capana00g002736	CFI_TOBAC Chalcone--flavonone isomerase OS=Nicotiana tabacum GN=CHI PE=2 SV=1	CHI	31.741	49.8	133	8	8	952970	968010	922730	986170	906620	884690	600840	617910	633590	921510	845050	886320	810520	841040	821470	1072500	1030800	974320	1026500	983950	946710	2049400	2143500	2162700
Capana00g002742	ATP5H_ARATH ATP synthase subunit d, mitochondrial OS=Arabidopsis thaliana GN=At3g52300 PE=1 SV=3	At3g52300	19.825	32.7	49	6	2	558790	652610	681120	599130	642040	646140	797800	786140	770020	922000	986490	967210	873600	856970	873300	804950	899790	973310	1010100	1051500	1046100	1173400	1204400	1171300
Capana00g002752	Y4967_ARATH Uncharacterized oxidoreductase At4g09670 OS=Arabidopsis thaliana GN=At4g09670 PE=1 SV=1	At4g09670	39.769	18.8	8	5	1	0	0	0	0	0	0	0	0	0	0	0	0	0	0	0	0	0	0	0	0	0	0	0	23540
Capana00g002753	Y4967_ARATH Uncharacterized oxidoreductase At4g09670 OS=Arabidopsis thaliana GN=At4g09670 PE=1 SV=1	At4g09670	39.963	25.2	30	6	4	0	0	0	0	0	0	0	0	0	0	0	0	113950	129120	133610	137920	138630	122320	130600	132010	123660	128320	131320	138310
Capana00g002754	DUF1681 domain-containing protein	---	24.922	16.5	24	3	3	51895	49215	31563	32026	30677	32512	21741	0	27220	34378	0	0	34847	30949	32114	32756	30488	21917	32405	29830	28473	0	0	0
Capana00g002774	AMPD_ARATH AMP deaminase OS=Arabidopsis thaliana GN=AMPD PE=1 SV=2	AMPD	84.193	10.7	61	5	5	108780	95227	106100	107170	92333	103550	94786	102800	106660	89847	87814	82982	120240	112990	121420	157510	142970	140140	143500	127020	137250	59620	66489	53144
Capana00g002792	GLGA_PARUW Glycogen synthase OS=Protochlamydia amoebophila (strain UWE25) GN=glgA PE=3 SV=1	glgA	114.67	19.6	81	12	12	131780	126050	131890	116570	116470	92656	200560	224240	216630	114230	91149	121840	99372	126720	89287	158580	157190	141430	195900	195340	208520	0	0	63077
Capana00g002793	CB2B_SOLLC Chlorophyll a-b binding protein 1B, chloroplastic OS=Solanum lycopersicum GN=CAB1B PE=3 SV=1	CAB1B	28.018	73.6	67	14	1	1593300	1654500	1908100	1938500	2167400	2118700	2210900	2108400	1985400	1909800	2183600	2086000	1925900	1935000	1895100	1410900	1513500	1548500	1967900	1880000	2121700	3845400	3199200	3142500
Capana00g002794	CB22_TOBAC Chlorophyll a-b binding protein 21, chloroplastic OS=Nicotiana tabacum GN=CAB21 PE=2 SV=1	CAB21	28.086	74	24	15	0	0	0	0	0	0	0	0	0	0	0	0	0	0	0	0	0	0	0	0	0	0	0	0	2028400
Capana00g002796	CB2B_SOLLC Chlorophyll a-b binding protein 1B, chloroplastic OS=Solanum lycopersicum GN=CAB1B PE=3 SV=1	CAB1B	28.079	72.3	27	13	2	6576500	2653900	0	4395800	3130100	3283900	0	0	2904900	0	3740200	3796200	3982800	2727100	0	3956900	3180200	0	6066700	3745500	0	0	0	0
Capana00g002799	CB22_TOBAC Chlorophyll a-b binding protein 21, chloroplastic OS=Nicotiana tabacum GN=CAB21 PE=2 SV=1	CAB21	28.076	78.9	719	16	1	21945000	22399000	21428000	22010000	23647000	22857000	24182000	23682000	22940000	24649000	21911000	24540000	26659000	25733000	25949000	25472000	24164000	24229000	21890000	23390000	22308000	37595000	38545000	37578000
Capana00g002800	CB2B_SOLLC Chlorophyll a-b binding protein 1B, chloroplastic OS=Solanum lycopersicum GN=CAB1B PE=3 SV=1	CAB1B	28.141	78.9	125	15	4	5764300	5694600	5162900	4278100	4318400	3840900	3976800	3797800	4247200	3861000	3551800	3512300	6156300	7588900	5944700	7771800	7800100	7690600	4778000	5483200	5119500	17637000	14606000	14327000
Capana00g002801	CB22_TOBAC Chlorophyll a-b binding protein 21, chloroplastic OS=Nicotiana tabacum GN=CAB21 PE=2 SV=1	CAB21	28.036	78.5	64	15	2	616200	738890	648490	985520	920400	953170	1020800	835090	625080	866100	758680	860530	948260	871430	907680	533550	272680	664580	1071600	1027300	1142300	1597600	1397500	964600
Capana00g002802	CB22_TOBAC Chlorophyll a-b binding protein 21, chloroplastic OS=Nicotiana tabacum GN=CAB21 PE=2 SV=1	CAB21	28.132	73.6	80	13	2	8467700	7838900	8070500	8550000	8334100	8077000	8252700	8296700	8431800	8361600	8114300	8135100	7984400	7469700	8045200	8400400	7416400	7341600	7387300	7189600	7437400	11979000	12148000	12603000
Capana00g002817	COG2_MOUSE Conserved oligomeric Golgi complex subunit 2 OS=Mus musculus GN=Cog2 PE=2 SV=2	Cog2	83.098	12.2	38	6	6	106740	110880	119960	113500	68765	116090	88623	112680	108820	93591	88199	88766	111380	113670	121280	119580	96202	109160	107560	115570	138260	85527	77299	82354
Capana00g002830	HEM2_ARATH Delta-aminolevulinic acid dehydratase, chloroplastic OS=Arabidopsis thaliana GN=HEMB PE=1 SV=1	HEMB	51.897	62.1	544	20	20	6282900	5775100	5905100	5880100	5800800	5816900	5470300	5614800	5687900	5290300	5145000	5184600	5912100	5810200	5981600	5394700	5318100	5214400	5045900	4991400	4885300	5214200	5386700	5442800
Capana00g002838	NRPE1_ARATH DNA-directed RNA polymerase E subunit 1 OS=Arabidopsis thaliana GN=NRPE1 PE=1 SV=1	NRPE1	103.03	5.3	28	3	3	65189	53812	47154	60723	41877	0	39000	45132	0	0	40750	47447	37799	29901	43354	40707	43443	41420	44768	0	47716	0	0	0
Capana00g002840	DNA-directed RNA polymerase subunit	---	11.433	18.8	5	1	1	0	0	0	0	0	0	0	0	0	0	0	0	0	0	0	0	0	0	0	0	14177	0	0	0
Capana00g002842	NRPE1_ARATH DNA-directed RNA polymerase E subunit 1 OS=Arabidopsis thaliana GN=NRPE1 PE=1 SV=1	NRPE1	99.183	9.6	35	5	5	86636	79158	65613	38162	57693	61150	57696	55907	53990	49903	39158	43525	47127	44325	0	51113	51399	52573	52887	47984	47380	0	0	22041
Capana00g002843	Transglut_core2 domain-containing protein	---	48.441	9.4	23	2	2	32471	0	0	0	0	0	0	0	0	0	0	0	0	0	0	0	0	0	0	0	0	0	0	0
Capana00g002845	NQR_SOLTU NAD(P)H:quinone oxidoreductase OS=Solanum tuberosum PE=2 SV=1	---	18.902	13.6	1	1	1	0	0	0	0	0	0	0	0	0	0	0	0	0	0	0	0	0	0	0	43199	0	0	0	0
Capana00g002847	NQR_SOLTU NAD(P)H:quinone oxidoreductase OS=Solanum tuberosum PE=2 SV=1	---	21.866	45.7	100	8	8	502750	500650	493640	554020	545460	525420	443580	476350	489740	545580	525430	544990	345610	353820	292760	340510	363030	313970	280650	327430	293130	484370	518840	536650
Capana00g002855	NEP1_NEPGR Aspartic proteinase nepenthesin-1 OS=Nepenthes gracilis GN=nep1 PE=1 SV=1	nep1	47.693	34.5	208	10	10	2543600	2872800	3031800	3274800	3369800	3582400	2447100	2402900	2419100	2797500	2766700	2767400	3279000	3449800	3441300	2833300	3065400	3077600	2262500	2390100	2480300	5614800	5221000	5224700
Capana00g002858	CITRX_ARATH Thioredoxin-like protein CITRX, chloroplastic OS=Arabidopsis thaliana GN=At3g06730 PE=1 SV=1	At3g06730	26.975	27.5	60	5	4	258780	222290	247990	236940	264150	251000	310810	250730	247490	389050	392730	385100	259510	251470	261070	250720	196230	256150	321310	258040	294200	422670	394370	397930
Capana00g002859	KEG_ARATH E3 ubiquitin-protein ligase KEG OS=Arabidopsis thaliana GN=KEG PE=1 SV=2	KEG	179.16	7.6	66	8	8	87042	82252	77241	70305	66534	60593	86018	99628	98110	59826	54146	66184	40894	38409	48276	71892	72831	77905	93259	89636	90496	0	0	0
Capana00g002861	PPA26_ARATH Bifunctional purple acid phosphatase 26 OS=Arabidopsis thaliana GN=PAP26 PE=1 SV=1	PAP26	52.447	52.5	302	17	16	2327800	2387400	2451400	2844100	2744300	2933300	2250200	2260900	2349200	2554900	2524500	2483200	2779200	2736000	2778100	2385500	2311600	2379100	1941400	1833700	1884000	3692900	3822300	3660900
Capana00g002862	ESYT3_MOUSE Extended synaptotagmin-3 OS=Mus musculus GN=Esyt3 PE=2 SV=2	Esyt3	63.761	23.2	78	7	6	116410	132280	124200	137150	128990	129150	142670	126630	137360	111720	114260	112230	122330	114530	125000	140750	133290	137390	119390	129390	120000	117030	119460	110580
Capana00g002878	EI2BD_RABIT Translation initiation factor eIF-2B subunit delta OS=Oryctolagus cuniculus GN=EIF2B4 PE=2 SV=2	EIF2B4	70.407	5.6	8	3	3	45359	61506	0	0	45799	0	0	0	0	0	0	48193	55725	0	0	0	0	0	0	0	0	0	0	0
Capana00g002879	NMCP_ARATH Putative nuclear matrix constituent protein 1-like protein OS=Arabidopsis thaliana GN=At5g65770 PE=2 SV=1	At5g65770	133.66	16.9	157	16	15	274110	299020	292310	211840	260170	235120	293910	321610	325770	301610	286540	288950	201060	210660	225360	299790	290750	274970	384570	390850	375620	108360	140580	114720
Capana00g002883	ENG2_SCHPO Putative endo-1,3(4)-beta-glucanase 2 OS=Schizosaccharomyces pombe (strain 972 / ATCC 24843) GN=eng2 PE=2 SV=1	eng2	78.87	13.4	38	6	6	49963	103620	95371	119040	115590	118760	62118	59991	51207	124730	121410	112170	122660	93916	97764	80453	78458	95543	86028	75615	75661	106580	104780	89172
Capana00g002884	ENG2_SCHPO Putative endo-1,3(4)-beta-glucanase 2 OS=Schizosaccharomyces pombe (strain 972 / ATCC 24843) GN=eng2 PE=2 SV=1	eng2	60.66	11.1	36	4	4	69620	62666	52607	64666	48489	50738	51051	46915	36515	57744	73098	60660	100090	105170	117460	112330	89395	105900	78484	67230	68012	86643	85078	95626
Capana00g002887	protein trichome birefringence-like 19	---	49.444	19.7	6	5	5	42209	0	55708	43495	37945	36145	0	0	26961	0	0	0	0	24270	0	0	0	28263	0	0	0	0	0	0
Capana00g002909	Putative ovule protein	---	55.246	6.5	20	2	2	0	32600	22310	0	0	22229	0	21608	16911	21290	0	19651	0	20633	0	0	19419	0	17065	18717	23663	0	0	0
Capana00g002919	QORH_ARATH Putative quinone-oxidoreductase homolog, chloroplastic OS=Arabidopsis thaliana GN=At4g13010 PE=2 SV=1	At4g13010	35.957	49.6	129	11	10	633340	661540	613780	694050	677620	676700	691420	722890	731830	729270	685320	730800	631890	649900	627450	666430	632780	666440	669030	645000	620410	975070	1009800	959210
Capana00g002920	AB32G_ARATH ABC transporter G family member 32 OS=Arabidopsis thaliana GN=ABCG32 PE=1 SV=1	ABCG32	155.91	2.6	16	3	2	19751	23357	21332	20475	0	17689	26413	0	0	14906	17195	16828	40794	33096	32652	30525	38047	43541	34205	29391	29429	0	0	13664
Capana00g002925	TCPH_CHICK T-complex protein 1 subunit eta OS=Gallus gallus GN=CCT7 PE=1 SV=1	CCT7	60.226	60	394	22	22	2095800	2099000	2024700	2042700	2091900	2030400	1669200	1776200	1754800	1884100	1884200	1890800	1925700	1871000	1875300	1983000	1936900	1828600	2010000	2001100	1980700	1731200	1787100	1753700
Capana00g002932	VICHY_VICSN Vicianin hydrolase (Fragment) OS=Vicia sativa subsp. nigra PE=1 SV=1	---	58.816	5	30	2	2	86957	84591	88090	73261	70218	88117	64403	63616	68438	60564	60973	51616	36867	0	29674	55671	49749	34422	0	18156	29477	32370	27613	31537
Capana00g002935	Putative ovule protein	---	12.904	16.9	8	1	1	0	0	0	0	0	0	0	0	0	0	0	0	0	0	0	0	0	0	0	0	0	0	0	22837
Capana00g002941	AIFA_DICDI Apoptosis-inducing factor homolog A OS=Dictyostelium discoideum GN=aifA PE=3 SV=1	aifA	38.258	10.1	21	2	2	0	0	19250	20810	21837	17230	0	19746	0	20710	0	19984	35834	0	24811	23886	23542	21987	20911	0	0	25969	25714	0
Capana00g002943	URIC1_SOYBN Uricase-2 isozyme 1 OS=Glycine max PE=1 SV=2	---	34.82	50.5	151	10	10	535610	510940	488340	489700	477360	475270	445810	457920	467540	494550	523310	515130	292990	287780	293370	309110	301300	273480	219370	238130	219760	336750	341090	362660
Capana00g002948	CNMT_THLFG (S)-coclaurine N-methyltransferase OS=Thalictrum flavum subsp. glaucum PE=1 SV=1	---	41.437	18.5	32	5	5	88903	96873	87503	119460	111640	116820	52563	83703	97461	59599	68191	80570	78680	100050	121990	88067	100210	114180	84784	76588	79227	76586	96367	87597
Capana00g002950	NUD26_ARATH Nudix hydrolase 26, chloroplastic OS=Arabidopsis thaliana GN=NUDT26 PE=1 SV=1	NUDT26	18.826	52.1	56	6	6	144210	122660	138420	171610	160520	160830	171200	170420	42892	255160	193480	234370	119710	112540	139780	126830	120720	117980	140760	162860	134200	191870	235360	177000
Capana00g002959	GLO2D_ARATH Probable hydroxyacylglutathione hydrolase 2, chloroplast OS=Arabidopsis thaliana GN=GLX2-4 PE=2 SV=1	GLX2-4	35.125	39	172	7	7	982330	886770	844110	798320	777940	819540	982830	986150	1026300	1006000	958720	968660	858380	879360	960280	915040	860330	896480	955550	920970	875180	1086800	1106300	1069100
Capana00g002965	GP107_MOUSE Protein GPR107 OS=Mus musculus GN=Gpr107 PE=2 SV=2	Gpr107	49.36	6.2	8	2	2	0	0	35758	30142	0	33477	0	0	0	0	0	0	0	0	0	0	0	0	0	0	0	0	0	0
Capana00g002970	CXE13_ARATH Probable carboxylesterase 13 OS=Arabidopsis thaliana GN=CXE13 PE=2 SV=1	CXE13	36.627	7	7	2	1	0	0	0	0	0	0	0	0	0	0	0	0	0	0	0	0	0	0	0	0	0	0	0	17963
Capana00g002980	CXE13_ARATH Probable carboxylesterase 13 OS=Arabidopsis thaliana GN=CXE13 PE=2 SV=1	CXE13	36.327	37.2	56	7	6	122920	111020	111220	132400	127110	108460	102350	96151	109460	94429	84892	83805	83154	90710	87768	72023	94021	62699	61418	67631	70206	100310	108090	107430
Capana00g002999	PSBA_PETHY Photosystem Q(B) protein OS=Petunia hybrida GN=psbA PE=3 SV=3	psbA	19.335	14.6	0	2	1	0	0	0	0	0	0	0	0	0	0	0	0	0	0	0	0	0	0	0	0	0	0	0	0
Capana00g003005	TM87A_XENTR Transmembrane protein 87A OS=Xenopus tropicalis GN=tmem87a PE=2 SV=1	tmem87a	57.9	11.8	36	3	3	43238	39659	43793	36997	20485	27648	30356	30185	30356	0	23242	27697	25660	29161	41706	26362	34870	21767	25130	0	29455	0	0	0
Capana00g003007	PME34_ARATH Probable pectinesterase/pectinesterase inhibitor 34 OS=Arabidopsis thaliana GN=PME34 PE=2 SV=1	PME34	66.341	13.1	48	6	5	65215	86886	119120	116090	146370	145980	91226	98879	92099	111300	119170	116420	106730	117380	115110	63126	69181	68386	81197	60315	73439	97845	90309	72649
Capana00g003011	protein CHLORORESPIRATORY REDUCTION 6, chloroplastic	---	27.811	35.2	42	5	4	31350	23508	50323	38270	49215	67897	86172	62044	76976	105330	93047	94829	64720	82355	81616	42388	66013	58580	78952	83486	96124	180430	143930	176840
Capana00g003035	FTSH9_ARATH ATP-dependent zinc metalloprotease FTSH 9, chloroplastic OS=Arabidopsis thaliana GN=FTSH9 PE=2 SV=1	FTSH9	76.771	10.8	29	5	5	32562	48800	73083	46310	60996	60962	80435	71697	66838	58822	59001	52453	65048	73143	61663	51584	70950	71905	74497	60744	40870	59577	56529	25043
Capana00g003039	GLUA_DICDI Lysosomal beta glucosidase OS=Dictyostelium discoideum GN=gluA PE=1 SV=2	gluA	66.235	24	123	11	11	381520	391960	388870	383450	419140	398910	365050	358240	363000	328600	339750	318080	418820	423930	397960	384860	396070	413310	328340	352180	367040	420280	400430	398820
Capana00g003041	EIF3K_ORYSJ Eukaryotic translation initiation factor 3 subunit K OS=Oryza sativa subsp. japonica GN=TIF3K1 PE=2 SV=1	TIF3K1	26.384	47.6	94	10	10	214540	189700	215010	252150	253610	282260	197440	189650	196670	253820	257230	231010	256190	263200	216170	203710	206630	215990	181280	186630	175900	441210	380270	382260
Capana00g003043	CYSZ_CUCMA Citrate synthase, glyoxysomal OS=Cucurbita maxima PE=1 SV=1	---	56.18	46.5	248	16	16	948370	974570	897760	860910	904210	924420	851530	818710	804600	805190	781010	792710	1011900	1016700	1002700	970190	1008700	981080	805870	844560	841910	1098700	1096700	1102500
Capana00g003049	BIG1_HUMAN Brefeldin A-inhibited guanine nucleotide-exchange protein 1 OS=Homo sapiens GN=ARFGEF1 PE=1 SV=2	ARFGEF1	52.999	26.4	96	8	8	262310	287510	255890	235160	229480	214860	274550	268710	259220	208410	168970	193720	174580	154560	195500	246260	261740	280450	295800	268880	292180	73246	159250	96122
Capana00g003050	BIG2_HUMAN Brefeldin A-inhibited guanine nucleotide-exchange protein 2 OS=Homo sapiens GN=ARFGEF2 PE=1 SV=3	ARFGEF2	90.704	22.7	124	13	13	232690	253430	225450	210610	189400	200510	320550	302780	300350	187640	195450	186030	156250	145520	156390	241760	258200	260090	261300	297140	266680	53921	42854	76871
Capana00g003054	PSAB_JASNU Photosystem I P700 chlorophyll a apoprotein A2 OS=Jasminum nudiflorum GN=psaB PE=3 SV=1	psaB	19.109	12.8	45	1	1	231320	0	0	0	278920	0	0	0	0	0	0	168720	382830	321610	457790	632770	368440	595780	237040	237860	0	519730	400950	490320
Capana00g003058	GYRB_NICBE DNA gyrase subunit B, chloroplastic/mitochondrial OS=Nicotiana benthamiana GN=GYRB PE=2 SV=1	GYRB	30.667	30.9	70	5	5	222430	221530	212070	241570	216760	223740	179970	186760	177090	149380	153180	150740	152680	158560	160450	165450	153870	155370	144250	143720	122310	88847	101330	101270
Capana00g003062	GYRB_NICBE DNA gyrase subunit B, chloroplastic/mitochondrial OS=Nicotiana benthamiana GN=GYRB PE=2 SV=1	GYRB	61.643	22.1	86	9	9	251770	246710	253550	258010	255370	268940	237560	247750	238990	220870	212350	207100	183870	181040	170550	180200	165580	187710	188410	181940	184970	161490	159350	133080
Capana00g003075	TPK1_MOUSE Thiamin pyrophosphokinase 1 OS=Mus musculus GN=Tpk1 PE=1 SV=1	Tpk1	29.222	13.4	23	2	2	26561	16380	36355	0	25535	0	0	0	0	0	0	0	0	0	0	19108	0	0	22290	0	0	0	0	23804
Capana00g003077	WDR89_DICDI WD repeat-containing protein 89 homolog OS=Dictyostelium discoideum GN=wdr89 PE=4 SV=1	wdr89	42.098	9.7	18	2	2	39947	31216	31881	19155	43803	36048	23310	0	0	0	0	12323	19286	37081	0	10867	0	0	0	12679	23158	0	13670	0
Capana00g003078	CS domain-containing protein (Fragment)	---	22.164	43.7	118	7	7	635140	628860	629650	560130	551230	519150	443740	426890	422420	676680	553030	546430	595050	553950	588830	689850	641540	622530	634290	663910	566420	852180	903840	902150
Capana00g003079	AB4C_ARATH ABC transporter C family member 4 OS=Arabidopsis thaliana GN=ABCC4 PE=1 SV=2	ABCC4	168.5	14.7	115	16	15	517700	482850	431920	402080	395310	402450	605320	568190	572520	345970	363240	365330	493360	451760	463430	725210	725940	616040	549450	544700	655080	100150	222730	202830
Capana00g003084	ABA2_ARATH Xanthoxin dehydrogenase OS=Arabidopsis thaliana GN=ABA2 PE=1 SV=1	ABA2	28.561	46.1	74	7	7	194280	144930	162180	155240	151080	143910	156220	167640	171320	120860	119110	131320	102490	119480	110180	125820	103950	103180	117950	118850	115560	81524	91423	90910
Capana00g003085	ABA2_ARATH Xanthoxin dehydrogenase OS=Arabidopsis thaliana GN=ABA2 PE=1 SV=1	ABA2	31.181	66.8	284	13	13	1727200	1677400	1660300	1734200	1688300	1643200	1738800	1754800	1820900	1581900	1613300	1568000	1762700	1719700	1690200	1532400	1502200	1469900	1675500	1640400	1661900	1577000	1541900	1575700
Capana00g003105	GSTX4_TOBAC Probable glutathione S-transferase OS=Nicotiana tabacum PE=2 SV=1	---	23.67	31	56	7	4	478050	443230	445460	483570	473400	483800	453040	500970	463240	377240	335060	392040	409260	393850	347590	439160	447880	461600	317900	339680	356840	466250	461620	434400
Capana00g003111	GLO1_ARATH Peroxisomal (S)-2-hydroxy-acid oxidase GLO1 OS=Arabidopsis thaliana GN=GLO1 PE=1 SV=1	GLO1	45.581	69.6	2455	25	19	22864000	25520000	27371000	27254000	28455000	30389000	34686000	31712000	31855000	34725000	33388000	32151000	32384000	31106000	30923000	24102000	25572000	28166000	24784000	25411000	25751000	43924000	41640000	39330000
Capana00g003116	Putative B-cell receptor-associated protein 31-like	---	23.02	14.3	25	2	2	45038	42196	38267	40865	35137	40527	29697	30956	25060	28171	37530	0	39569	39370	34931	38788	36418	36443	36621	24849	27856	36275	31938	46635
Capana00g003123	VPS39_MOUSE Vam6/Vps39-like protein OS=Mus musculus GN=Vps39 PE=2 SV=1	Vps39	106.39	18.1	49	12	12	147610	163690	180960	161670	137090	149780	191310	176640	202210	131480	134990	129990	163280	171980	163650	141730	182560	172200	160750	186110	212000	80325	70227	133140
Capana00g003129	HEBP2_HUMAN Heme-binding protein 2 OS=Homo sapiens GN=HEBP2 PE=1 SV=1	HEBP2	26.013	62.8	302	13	8	3730100	3666600	3465100	3826000	3801800	3553100	3445500	3514300	3427500	3728900	3556400	3694200	3867400	3817600	3858800	3676900	3596000	3490600	3422600	3367300	3373200	5400500	5111800	5413800
Capana00g003130	HEBP2_HUMAN Heme-binding protein 2 OS=Homo sapiens GN=HEBP2 PE=1 SV=1	HEBP2	24.867	46.4	17	9	6	0	0	56007	0	0	0	0	0	0	0	0	0	307000	474530	321510	0	0	0	201450	198110	214210	0	0	0
Capana00g003131	HEBP2_HUMAN Heme-binding protein 2 OS=Homo sapiens GN=HEBP2 PE=1 SV=1	HEBP2	25.073	63.1	156	12	7	1055700	1104600	1082900	1169200	1102300	1192200	1202100	1183100	1165600	1318500	1266000	1256200	1255500	1237600	1283100	1214900	1219400	1190600	1277300	1265900	1238400	1766000	1731800	1813900
Capana00g003140	RAE1C_ARATH Ras-related protein RABE1c OS=Arabidopsis thaliana GN=RABE1C PE=1 SV=1	RABE1C	21.666	19.9	1	3	1	0	0	0	0	0	0	0	0	0	0	0	0	0	0	0	0	0	0	0	0	0	0	0	9363
Capana00g003150	MDAR_SOLLC Monodehydroascorbate reductase OS=Solanum lycopersicum GN=AFRR PE=1 SV=1	AFRR	26.504	4.6	8	1	1	0	0	0	0	0	0	0	0	0	0	0	0	0	0	0	0	0	0	0	0	0	0	0	43555
Capana00g003165	2ABB_ARATH Serine/threonine protein phosphatase 2A 55 kDa regulatory subunit B beta isoform OS=Arabidopsis thaliana GN=PP2AB2 PE=2 SV=1	PP2AB2	57.169	20.5	27	7	3	0	0	0	0	38671	0	34249	76037	0	36106	0	0	35340	46442	44958	54194	45479	49431	42188	72849	44086	0	0	17935
Capana00g003177	RL281_ARATH 60S ribosomal protein L28-1 OS=Arabidopsis thaliana GN=RPL28A PE=1 SV=1	RPL28A	15.835	45.5	37	6	1	140200	150380	150790	51290	0	168190	137520	0	125360	123620	114720	112460	166030	157190	132590	163700	162670	151280	128980	142760	130950	122950	146280	102290
Capana00g003189	TRXH_RICCO Thioredoxin H-type OS=Ricinus communis PE=3 SV=1	---	12.85	59	67	5	3	287530	307150	307530	269660	270020	309840	272610	233560	243890	376270	302290	298020	268920	225540	255170	288040	352800	291000	336840	314000	307180	372040	415590	333770
Capana00g003194	DXS_CAPAN Probable 1-deoxy-D-xylulose-5-phosphate synthase, chloroplastic OS=Capsicum annuum GN=TKT2 PE=2 SV=1	TKT2	79.653	17.9	151	7	7	1005900	954660	916710	846270	856470	880120	755460	736680	755020	588740	583050	585660	769620	775860	780640	662650	626440	630060	627740	603480	575600	528410	510560	558230
Capana00g003196	Protein RALF-like 1	---	14.233	20	22	3	3	0	0	0	29536	29316	32590	0	19382	0	40753	32893	40167	56840	37241	27411	35132	35850	75725	34028	21899	20047	41662	35938	41690
Capana00g003212	ATP7_ARATH Probable ATP synthase 24 kDa subunit, mitochondrial OS=Arabidopsis thaliana GN=At2g21870 PE=1 SV=1	At2g21870	27.757	55.8	288	14	14	1980900	2294500	2245700	2410700	2361500	2470900	2610800	2622300	2532000	3648300	3713800	3604900	2826300	2777000	2760500	2656500	2759300	2961800	3299700	3267600	3222700	3988000	3993800	3783900
Capana00g003213	SPCS2_ARATH Probable signal peptidase complex subunit 2 OS=Arabidopsis thaliana GN=At2g39960 PE=2 SV=1	At2g39960	12.601	32.7	80	3	3	391580	372290	416350	465020	209040	496540	370580	388810	380230	518970	473540	446580	560620	543090	557910	470480	511030	491650	409580	432330	419510	825450	871870	753000
Capana00g003216	DRP4C_ARATH Dynamin-related protein 4C OS=Arabidopsis thaliana GN=DRP4C PE=2 SV=1	DRP4C	43.164	42.6	136	11	9	384980	375220	336430	336830	305780	268550	274610	251070	269120	179630	170230	178630	255810	255060	255360	298720	293510	258320	260490	225930	229350	88832	42509	89208
Capana00g003217	DRP4C_ARATH Dynamin-related protein 4C OS=Arabidopsis thaliana GN=DRP4C PE=2 SV=1	DRP4C	32.133	33.4	65	6	3	187710	192850	183490	197940	198550	186610	166910	187230	214950	110060	111460	126390	171000	177050	175970	204690	183040	163150	178050	165560	155670	87608	40742	59951
Capana00g003219	CHKB_HUMAN Choline/ethanolamine kinase OS=Homo sapiens GN=CHKB PE=1 SV=3	CHKB	40.402	5.2	2	1	1	0	0	0	0	0	0	0	0	0	0	0	10128	0	0	0	0	0	0	0	0	0	0	0	0
Capana00g003222	CHI5_ORYSJ Chitinase 5 OS=Oryza sativa subsp. japonica GN=Cht5 PE=2 SV=1	Cht5	30.062	30.7	116	6	6	477620	482420	452320	499850	464530	500490	433490	431370	454520	819510	813490	799620	756710	760140	720160	612820	586640	589460	549940	599700	592070	1568000	1604600	1590800
Capana00g003228	SCO12_ARATH Protein SCO1 homolog 2, mitochondrial OS=Arabidopsis thaliana GN=HCC2 PE=2 SV=1	HCC2	24.591	26.9	7	3	3	0	0	0	8215	9882.2	0	0	0	0	0	9674.4	0	0	0	10324	0	0	0	0	0	0	50796	0	0
Capana00g003255	C3H31_ARATH Zinc finger CCCH domain-containing protein 31 OS=Arabidopsis thaliana GN=At2g47680 PE=2 SV=2	At2g47680	108.6	7.9	22	4	4	55430	51876	44462	50099	39817	41716	35432	41936	43447	0	30724	0	21627	31405	26556	45357	36742	33330	27878	36384	38136	0	0	0
Capana00g003256	ASP1_ORYSJ Aspartic proteinase Asp1 OS=Oryza sativa subsp. japonica GN=ASP1 PE=2 SV=1	ASP1	43.995	13.8	31	4	4	82973	83718	84176	93189	87644	68157	73526	73577	64589	59510	85113	73447	87054	75524	74621	103760	79674	82128	57699	54472	52552	118260	147060	175180
Capana00g003266	PME_ACTDE Pectinesterase OS=Actinidia deliciosa PE=1 SV=1	---	51.386	30.6	221	11	10	1915300	1911700	1873700	1922500	2061100	2031100	1560000	1600300	1576200	1853000	1852100	1852700	1855400	1865700	1837600	1795100	1823300	1811900	1383500	1377800	1406600	3054600	3011000	2826000
Capana00g003268	RL192_ARATH 60S ribosomal protein L19-2 OS=Arabidopsis thaliana GN=RPL19B PE=2 SV=1	RPL19B	24.806	30.4	64	5	2	171200	161240	141300	139250	182830	187260	238760	235090	232780	274980	279550	212300	189230	150020	147260	167610	185930	252060	472340	496580	484590	84080	82651	72878
Capana00g003269	FUM2_ARATH Fumarate hydratase 2, chloroplastic OS=Arabidopsis thaliana GN=FUM2 PE=2 SV=1	FUM2	50.83	43.6	95	12	6	353540	394210	432640	413970	425640	447840	432590	458230	454610	386750	390130	388300	269860	250690	198240	241860	259650	278330	219350	230490	221860	261370	248190	222060
Capana00g003274	IMA_SOLLC Importin subunit alpha OS=Solanum lycopersicum PE=2 SV=2	---	59.219	37.5	124	12	8	273630	262390	262780	248480	227310	233530	267140	285120	244940	219300	243490	227020	227210	247960	234460	275030	249670	256040	277730	279310	276200	135540	144270	140310
Capana00g003275	DJB11_MOUSE DnaJ homolog subfamily B member 11 OS=Mus musculus GN=Dnajb11 PE=1 SV=1	Dnajb11	37.535	29	127	8	8	476850	477800	411250	455480	401180	439140	356870	384360	453630	548430	534570	537410	417370	400460	396640	449600	430130	392250	497030	476200	462780	522000	519770	525410
Capana00g003279	PFD2_ARATH Probable prefoldin subunit 2 OS=Arabidopsis thaliana GN=At3g22480 PE=2 SV=1	At3g22480	21.324	22.3	24	2	2	0	209790	150980	0	160850	0	0	110100	0	54242	0	104240	0	0	0	0	0	0	0	0	0	100650	303600	340310
Capana00g003282	FFR_DICDI Protein fat-free homolog OS=Dictyostelium discoideum GN=ffr PE=3 SV=1	ffr	88.996	11.6	18	5	5	13110	23699	25687	30777	26236	22810	28650	37477	29900	21395	23894	23728	21987	27113	14786	37006	0	33035	32157	0	30389	0	0	0
Capana00g003284	CP12_CHLRE Calvin cycle protein CP12 OS=Chlamydomonas reinhardtii GN=cp12 PE=1 SV=1	cp12	13.861	53.5	112	6	5	5699700	5443500	4983400	4881400	4797300	4580300	4739600	4982200	5079100	5651300	5750200	5624000	4012500	4141600	4106700	4619600	4421600	4188800	4153600	4093500	3896200	2603100	2720200	2844400
Capana00g003291	PP178_ARATH Pentatricopeptide repeat-containing protein At2g31400, chloroplastic OS=Arabidopsis thaliana GN=At2g31400 PE=2 SV=1	At2g31400	217.76	20.2	287	24	24	1017900	969330	967440	1065400	1077200	1057100	886870	827210	881100	914890	899650	885980	1020000	1012400	990560	957370	957000	948120	905390	921310	878690	1096400	1100800	1067700
Capana00g003295	GLNB_ARATH Nitrogen regulatory protein P-II homolog OS=Arabidopsis thaliana GN=GLB1 PE=1 SV=1	GLB1	22.128	32.7	91	6	6	916490	898050	982920	1025500	1073700	1130400	1200400	1231500	1177000	1520300	1631400	1694000	819810	986030	935530	774770	946340	1003500	1074200	1094400	1148100	1970700	1831000	1715200
Capana00g003298	TOLB_PELCD Protein tolB OS=Pelobacter carbinolicus (strain DSM 2380 / Gra Bd 1) GN=tolB PE=3 SV=1	tolB	78.473	22.5	69	10	10	125970	100850	105090	91526	95936	95194	90794	97579	78812	103960	111010	113520	99387	83845	88799	67724	69609	63188	94804	85939	73968	67546	48178	60751
Capana00g003308	COX2_BETVU Cytochrome c oxidase subunit 2 OS=Beta vulgaris GN=COX2 PE=2 SV=1	COX2	15.186	7.4	24	1	1	0	0	0	0	0	0	0	0	0	0	0	0	0	0	0	0	0	0	0	0	0	0	0	408900
Capana00g003324	WHI3_YEAST Protein WHI3 OS=Saccharomyces cerevisiae (strain ATCC 204508 / S288c) GN=WHI3 PE=1 SV=1	WHI3	29.637	55	240	9	9	796360	747460	729260	701630	669010	679140	542940	545880	545480	957380	975360	1007200	718630	740410	752610	864170	778590	704030	790140	757350	757780	1192700	1325000	1224600
Capana00g003366	THF1_SOLTU Protein THYLAKOID FORMATION1, chloroplastic OS=Solanum tuberosum GN=THF1 PE=2 SV=1	THF1	17.372	28.9	86	4	4	359200	337840	351440	369650	375560	406650	395950	394110	365830	388560	361770	348070	367320	379340	373030	353370	375530	344320	344130	341140	334330	346080	351160	369550
Capana00g003367	THF1_SOLTU Protein THYLAKOID FORMATION1, chloroplastic OS=Solanum tuberosum GN=THF1 PE=2 SV=1	THF1	18.261	40.9	111	7	7	1029100	1095100	1220700	1303800	1311600	1526000	1559100	1477500	1531700	1321700	1413900	1161500	1528100	1449900	1508100	1110200	1204300	1358900	1268200	1347000	1329800	1512200	1456600	1399200
Capana00g003369	DGKI_HUMAN Diacylglycerol kinase iota OS=Homo sapiens GN=DGKI PE=1 SV=1	DGKI	54.665	22.5	18	6	2	40887	55665	35751	0	44822	49331	29468	23858	0	0	32416	0	51111	48532	0	61391	0	17352	16670	0	0	0	0	0
Capana00g003378	GALE2_CYATE UDP-glucose 4-epimerase GEPI48 OS=Cyamopsis tetragonoloba PE=2 SV=1	---	38.651	51	182	12	11	385940	352980	341070	423300	372840	389360	394740	384280	416260	387990	377820	389590	389830	391830	408790	410880	433490	373950	385810	342520	348330	659300	656940	659310
Capana00g003379	NDK4_ARATH Nucleoside diphosphate kinase IV, chloroplastic/mitochondrial OS=Arabidopsis thaliana GN=NDK4 PE=1 SV=2	NDK4	25.808	23.5	117	5	2	1154400	1027900	955680	991850	954480	951400	934330	954160	1011800	1131500	1158000	1138700	1086700	1099300	1157500	1304600	1193600	1149300	1216400	1164100	1187400	1654700	1772500	1803700
Capana00g003381	trichohyalin isoform X1	---	146.42	4.3	35	3	3	36503	31034	33902	38418	31440	27266	21968	25744	16866	32047	30788	33122	0	0	21754	28148	28418	32628	37113	26986	34131	27937	20705	31855
Capana00g003382	NAD(P)H-quinone oxidoreductase subunit S, chloroplastic	---	26.677	61	205	14	14	2652000	2688500	2487800	2517000	2441500	2410600	3287300	3215700	3094500	3038600	2927000	2813000	2514600	2580300	2623700	2512500	2514800	2551800	2560800	2731600	2848300	2886900	3150700	3195700
Capana00g003388	GPAT3_RAT Glycerol-3-phosphate acyltransferase 3 OS=Rattus norvegicus GN=Agpat9 PE=2 SV=1	Agpat9	36.137	8	7	2	2	0	0	0	0	0	53651	42340	0	0	0	46410	0	0	0	47867	36939	55210	0	0	0	0	0	0	46536
Capana00g003389	UBR7_MOUSE Putative E3 ubiquitin-protein ligase UBR7 OS=Mus musculus GN=Ubr7 PE=2 SV=1	Ubr7	82.772	19.4	19	4	4	57962	61740	50677	44104	50548	41619	22054	22264	25811	47750	42466	41988	0	24379	18923	36684	42414	28714	41313	37573	0	0	0	0
Capana00g003392	LACS4_ARATH Long chain acyl-CoA synthetase 4 OS=Arabidopsis thaliana GN=LACS4 PE=2 SV=1	LACS4	70.173	14.3	60	7	2	138180	167000	175260	172610	158840	203380	231220	199820	213070	144010	113310	129330	180390	183350	178480	159260	141770	164110	155980	196790	216640	121820	148180	130830
Capana00g003394	LACS4_ARATH Long chain acyl-CoA synthetase 4 OS=Arabidopsis thaliana GN=LACS4 PE=2 SV=1	LACS4	45.333	30	9	7	2	0	0	0	0	0	0	0	0	0	0	0	0	0	0	0	0	0	0	0	0	0	0	0	8499.5
Capana00g003397	GUN6_ARATH Endoglucanase 6 OS=Arabidopsis thaliana GN=At1g64390 PE=2 SV=2	At1g64390	68.741	12	5	4	4	36289	0	42127	0	0	0	0	0	0	0	0	0	0	0	0	0	0	0	0	0	0	0	0	0
Capana00g003400	PRI1_MOUSE DNA primase small subunit OS=Mus musculus GN=Prim1 PE=1 SV=1	Prim1	52.881	3.7	3	1	1	0	0	0	0	0	0	0	0	0	0	0	0	0	0	0	0	0	0	0	0	0	0	0	8114
Capana00g003407	PGLR_VITVI Probable polygalacturonase OS=Vitis vinifera GN=GSVIVT00026920001 PE=1 SV=1	GSVIVT00026920001	48.502	23.9	72	6	6	506070	478840	435460	496680	432120	442960	274710	298450	296530	332950	348910	323460	321100	366380	322600	366340	353100	329020	303790	303440	267750	435530	469490	394500
Capana00g003415	SEH1_OSMMO Nucleoporin seh1 OS=Osmerus mordax GN=seh1l PE=2 SV=1	seh1l	36.066	23.4	39	5	5	56554	60160	53783	55940	57746	50533	45596	39633	39750	41140	52071	41423	49461	46474	45945	45709	42663	47277	36841	34792	39587	50099	51689	55400
Capana00g003424	Transcription termination factor mtef1, chloroplastic	---	35.863	20.6	26	4	4	36099	29346	33133	55066	44402	43806	25083	0	31455	0	0	0	29951	32449	45901	0	37742	33784	0	0	36911	0	30561	0
Capana00g003428	MCFB_DICDI Mitochondrial substrate carrier family protein B OS=Dictyostelium discoideum GN=mcfB PE=3 SV=1	mcfB	38.736	8.4	16	2	2	20224	0	0	15452	20181	0	17771	0	19042	0	0	0	30735	0	21057	0	16205	28120	0	0	0	0	52679	43800
Capana00g003429	centromere-associated protein E isoform X1	---	141.62	6.2	11	5	5	0	0	0	0	0	0	0	31762	0	0	0	0	28534	0	36226	38915	0	43138	63745	42096	55337	0	0	0
Capana00g003437	AAPC_CENCI Putative glucose-6-phosphate 1-epimerase OS=Cenchrus ciliaris PE=2 SV=1	---	34.017	50.2	151	11	11	549620	520360	521320	482780	495070	482510	595250	617630	605880	539920	530590	537410	490420	486290	501850	481780	494930	485040	447980	454230	434050	511680	482810	501170
Capana00g003453	SRSF7_HUMAN Serine/arginine-rich splicing factor 7 OS=Homo sapiens GN=SRSF7 PE=1 SV=1	SRSF7	24.326	21.8	53	4	2	297440	258440	235230	245450	213270	242610	190850	191280	237060	304010	313370	289670	205360	204400	199350	238030	215390	216180	267160	279180	290080	293690	350730	335270
Capana00g003486	URT1_FRAAN Putative UDP-rhamnose:rhamnosyltransferase 1 OS=Fragaria ananassa GN=GT4 PE=2 SV=1	GT4	52.914	50.3	406	21	20	6993000	7292400	7440300	7174300	7165700	7086200	6806500	6714000	6878500	4851800	4790400	4822100	2851400	2930800	2948000	3162700	3243300	3222800	2470700	2486900	2495000	2186300	2078000	2222200
Capana00g003500	ADK2_ARATH Adenosine kinase 2 OS=Arabidopsis thaliana GN=ADK2 PE=1 SV=1	ADK2	35	51.6	98	13	8	1266300	1261500	1176500	1413400	1359100	1325600	1271600	1302600	1158500	1170700	1159600	1144900	1445700	1420400	1442200	1436600	1373000	1392000	1223100	1223100	1164900	1428100	1421700	1402200
Capana00g003501	TSN_PONAB Translin OS=Pongo abelii GN=TSN PE=2 SV=1	TSN	27.395	24.1	72	5	5	285140	264170	276010	306190	288940	301240	251280	249420	256410	266410	276430	279150	284750	278230	285930	282960	290130	290740	244900	248980	251120	425610	415350	395950
Capana00g003506	OPR1_SOLLC 12-oxophytodienoate reductase 1 OS=Solanum lycopersicum GN=OPR1 PE=1 SV=1	OPR1	42.112	56.4	23	12	3	0	0	0	0	0	0	0	0	0	0	0	0	174550	183150	0	200950	192570	204890	204710	190760	207760	189300	186720	191510
Capana00g003507	OPR1_SOLLC 12-oxophytodienoate reductase 1 OS=Solanum lycopersicum GN=OPR1 PE=1 SV=1	OPR1	42.1	52.9	127	12	3	90825	73054	83052	92995	72915	101930	121390	111640	101720	105800	86243	111010	448450	488950	503290	515520	498310	564010	538360	578620	514040	621840	550720	523660
Capana00g003508	U86A1_ARATH UDP-glycosyltransferase 86A1 OS=Arabidopsis thaliana GN=UGT86A1 PE=2 SV=1	UGT86A1	44.125	14.8	15	3	3	450540	360000	378990	479260	0	385410	344930	409980	397500	352760	0	379120	422200	444180	451680	543090	407860	538840	0	0	412200	353640	336390	0
Capana00g003516	NH2L1_XENLA NHP2-like protein 1 OS=Xenopus laevis GN=nhp2l1 PE=2 SV=1	nhp2l1	14.138	43.1	75	4	2	344740	341810	313190	352120	342100	346810	233750	244250	239580	456090	417990	430600	280180	270840	247400	275330	264630	238270	423320	371770	352150	461300	522890	517190
Capana00g003518	PSMF1_ARATH Probable proteasome inhibitor OS=Arabidopsis thaliana GN=At3g53970 PE=2 SV=1	At3g53970	24.013	13.2	0	2	2	0	0	0	0	0	0	0	0	0	0	0	0	0	0	0	0	0	0	0	0	0	0	0	0
Capana00g003526	CX5B2_ARATH Cytochrome c oxidase subunit 5b-2, mitochondrial OS=Arabidopsis thaliana GN=COX5B-2 PE=2 SV=1	COX5B-2	12.1	35.1	66	6	4	449860	405960	378210	407920	372580	403800	439700	420780	466240	572640	580630	553920	419050	447280	393160	365170	386000	393230	447050	438660	459560	561880	571860	515880
Capana00g003527	SR542_SOLLC Signal recognition particle 54 kDa protein 2 OS=Solanum lycopersicum PE=2 SV=1	---	54.876	41.3	99	13	8	184070	215100	196360	211500	182510	191280	168100	156320	149470	132550	115700	110520	225700	186390	209770	211210	169700	205180	164100	181470	169330	141910	101220	133750
Capana00g003536	14339_SOLLC 14-3-3 protein 9 OS=Solanum lycopersicum GN=TFT9 PE=2 SV=2	TFT9	32.353	47.2	138	9	6	662800	632810	663540	488740	542240	573180	605330	649090	657100	640190	670120	665710	505030	525940	557280	604200	630510	623070	718290	720080	681260	350180	315450	333500
Capana00g003542	ILV5_ARATH Ketol-acid reductoisomerase, chloroplastic OS=Arabidopsis thaliana GN=At3g58610 PE=2 SV=2	At3g58610	61.481	45	336	18	16	6707800	6537900	6812300	6817300	6965600	7165400	6166900	5930000	6154900	7075000	6937700	6919600	6721200	6373500	6506400	5051100	5261700	5569200	4362000	4596800	4720900	7187400	6855800	7069800
Capana00g003547	NECP1_HUMAN Adaptin ear-binding coat-associated protein 1 OS=Homo sapiens GN=NECAP1 PE=1 SV=2	NECAP1	25.673	25.9	29	5	5	371160	352830	366070	407680	381320	424890	333970	397740	367310	454490	462490	407690	409950	397020	416700	438870	465550	407400	490350	469470	479260	451100	443720	410180
Capana00g003552	Protein trichome birefringence-like 40	---	42.062	15.7	48	4	4	52282	48669	48113	56240	55558	60725	49975	52207	47971	53645	54173	55123	35610	43871	43690	39056	34585	36261	33027	32579	37906	62052	68699	63791
Capana00g003557	BUP1_DICDI Beta-ureidopropionase OS=Dictyostelium discoideum GN=pyd3 PE=1 SV=1	pyd3	46.987	33.3	154	8	8	201410	196050	180730	205560	190140	201870	194470	170040	184410	181460	188020	176710	200480	219670	210150	194270	204680	189370	178600	177140	185310	280180	285630	304430
Capana00g003563	NUA_ARATH Nuclear-pore anchor OS=Arabidopsis thaliana GN=NUA PE=1 SV=1	NUA	228.63	12.5	96	18	17	207280	152670	151270	110880	110140	121190	234960	255010	268720	146510	131350	147850	116190	119060	110790	218390	214330	218640	353990	268140	344390	0	47678	37109
Capana00g003565	TAS_SHIFL Protein tas OS=Shigella flexneri GN=tas PE=3 SV=1	tas	14.995	51.9	97	5	5	590510	691940	664450	685480	677630	717340	662140	627900	717680	704570	713730	725240	538030	533120	562320	513540	542840	542030	400800	422850	426230	614370	574080	596180
Capana00g003566	TAS_SHIFL Protein tas OS=Shigella flexneri GN=tas PE=3 SV=1	tas	20.916	19.5	45	2	2	80878	109670	118850	104250	107070	113610	137200	143130	137200	135940	131490	125920	111510	114080	111090	88554	99672	112810	37966	106870	104530	116690	104620	100390
Capana00g003569	Y575_SYNY3 Thylakoid membrane protein slr0575 OS=Synechocystis sp. (strain PCC 6803 / Kazusa) GN=slr0575 PE=4 SV=1	slr0575	30.461	35.3	173	9	9	1429400	1338800	1283600	1415900	1433800	1371200	1358300	1394300	1417700	1029300	985560	1007600	1536300	1549100	1511900	1491400	1432400	1411400	1201400	1209000	1203600	1324800	1449100	1504200
Capana00g003570	1433E_TOBAC 14-3-3-like protein E OS=Nicotiana tabacum PE=2 SV=1	---	32.929	30.4	101	8	2	972570	925240	917220	770150	748050	714760	860990	879190	887300	1051200	1071300	1023400	947100	960990	978750	1090800	1016200	1043900	1190100	1138400	1112800	629150	683860	710500
Capana00g003571	RRP3_SPIOL 30S ribosomal protein 3, chloroplastic OS=Spinacia oleracea GN=PSRP3 PE=1 SV=1	PSRP3	20.076	18.8	1	2	1	0	0	0	0	0	0	0	0	0	0	0	0	0	0	0	0	0	0	0	0	0	0	0	13140
Capana00g003572	Y4837_ARATH KH domain-containing protein At4g18375 OS=Arabidopsis thaliana GN=At4g18375 PE=2 SV=1	At4g18375	76.081	36.1	188	15	15	578590	518150	524300	529840	529320	513680	419300	452140	435190	395980	413620	395800	479660	460390	504340	554780	524780	508320	482970	507740	517010	567830	519120	547200
Capana00g003591	ACT2_ORYSJ Actin-2 OS=Oryza sativa subsp. japonica GN=ACT2 PE=2 SV=1	ACT2	41.757	25.5	3	7	1	0	0	0	0	0	0	0	0	0	0	0	0	0	0	0	0	0	0	0	0	0	12249	0	0
Capana00g003603	BGL11_ARATH Beta-glucosidase 11 OS=Arabidopsis thaliana GN=BGLU11 PE=2 SV=2	BGLU11	42.346	23.6	107	6	6	194580	183380	187680	208410	201590	193710	238240	256630	238470	256310	236420	239860	146930	149580	157680	138160	163430	153260	158540	163520	169010	250120	244420	238650
Capana00g003613	PNAE_RAUSE Polyneuridine-aldehyde esterase OS=Rauvolfia serpentina GN=PNAE PE=1 SV=1	PNAE	29.795	33.7	41	5	5	51305	55646	63022	62716	81638	72471	63338	57272	63770	89182	87487	105860	53433	51148	53045	54128	53840	52705	54025	60785	54378	95789	89000	77217
Capana00g003616	PNAE_RAUSE Polyneuridine-aldehyde esterase OS=Rauvolfia serpentina GN=PNAE PE=1 SV=1	PNAE	14.331	27.3	29	2	2	79742	57470	50155	80977	65731	67062	0	0	0	0	0	0	73583	68276	67999	78479	0	46759	50325	64463	0	0	52803	50222
Capana00g003623	EFP_SPHWW Elongation factor P OS=Sphingomonas wittichii (strain RW1 / DSM 6014 / JCM 10273) GN=efp PE=3 SV=1	efp	25.517	5.8	14	1	1	0	0	0	0	0	0	0	0	0	0	0	0	0	0	0	0	0	0	0	0	0	0	0	6476.5
Capana00g003635	filamin A-interacting protein 1-like	---	24.919	10.5	6	1	1	0	0	0	0	0	0	0	0	0	0	0	0	0	0	0	0	0	0	4549.3	0	0	0	0	0
Capana00g003656	RL30_LUPLU 60S ribosomal protein L30 OS=Lupinus luteus GN=RPL30 PE=3 SV=1	RPL30	12.36	52.7	81	5	3	972490	995140	944860	1114800	1102500	1060300	794680	690920	726440	817500	783350	772700	966020	1529000	915300	887720	869280	890840	752730	704210	811000	932510	879290	887440
Capana00g003657	SCP29_ARATH Serine carboxypeptidase-like 29 OS=Arabidopsis thaliana GN=SCPL29 PE=2 SV=1	SCPL29	47.92	40.3	138	10	7	366450	395660	356510	392640	380460	420640	336350	338900	339420	522500	534250	528270	338200	376080	372210	297250	319670	314990	325900	340980	322820	754910	749850	740240
Capana00g003661	LACE1_HUMAN Lactation elevated protein 1 OS=Homo sapiens GN=LACE1 PE=2 SV=2	LACE1	57.063	6.8	14	2	2	0	14747	0	0	0	0	17500	0	20610	0	0	0	0	0	19211	21271	27347	0	21936	0	0	0	0	0
Capana00g003662	TM208_DICDI Transmembrane protein 208 homolog OS=Dictyostelium discoideum GN=tmem208 PE=3 SV=1	tmem208	19.846	8.7	11	1	1	0	0	0	0	0	0	0	0	0	0	0	0	0	0	0	0	0	0	0	0	0	0	0	16557
Capana00g003670	FCL2_ARATH Putative GDP-L-fucose synthase 2 OS=Arabidopsis thaliana GN=GER2 PE=2 SV=1	GER2	56.941	32.8	165	9	9	582450	558890	541040	625360	612080	605340	429300	463140	434000	587280	564110	553180	505700	518950	540550	613280	527680	494380	491610	445160	440080	463910	492280	501150
Capana00g003674	ABC transporter permease protein YtcP	---	13.707	10.8	11	1	1	0	0	0	0	0	0	0	0	0	0	0	0	0	0	0	0	0	0	0	0	0	0	0	47515
Capana00g003675	K0664_DROWI Protein KIAA0664 homolog OS=Drosophila willistoni GN=GK22132 PE=3 SV=1	GK22132	191.54	34.1	699	43	37	2280300	2352800	2315400	2060200	2133200	2189100	2283200	2310700	2241400	1600800	1623900	1671100	2261200	2229900	2229600	2041200	1995800	2044800	1994500	2011100	2057300	990430	956920	1069600
Capana00g003677	NUP43_HUMAN Nucleoporin Nup43 OS=Homo sapiens GN=NUP43 PE=1 SV=1	NUP43	47.43	8	35	2	2	46864	47779	46515	45296	0	46852	0	0	38854	43316	39119	46400	32033	0	42135	45878	0	46695	32047	0	33441	0	54032	46136
Capana00g003682	TTC1_MOUSE Tetratricopeptide repeat protein 1 OS=Mus musculus GN=Ttc1 PE=2 SV=1	Ttc1	28.208	29.7	48	5	4	81633	88807	67159	57297	70634	72450	46148	48764	56717	69762	84105	67764	55291	69712	42247	67719	53122	35823	91380	56988	87714	51151	67010	47711
Capana00g003683	NT5D_DICDI 5'-nucleotidase domain-containing protein DDB_G0275467 OS=Dictyostelium discoideum GN=DDB_G0275467 PE=3 SV=1	DDB_G0275467	85.09	10.1	62	5	5	157190	147900	149040	120790	107600	124970	141230	149530	175980	148650	131580	145190	167980	124560	134180	144490	146630	148900	144030	179220	183300	168290	132200	145520
Capana00g003687	probable phosphoinositide phosphatase SAC9	---	180.35	10.9	75	10	10	267450	217350	202550	240940	203360	188870	204290	204870	178370	118860	159350	166400	199880	195680	215080	211970	201600	219500	198580	207140	218250	81509	171730	83140
Capana00g003691	Tetraspanin-8	---	30.244	10.4	4	2	2	0	0	0	0	0	0	0	0	0	0	0	0	0	0	0	16972	13337	0	0	0	0	87369	45520	100150
Capana00g003717	FPGS1_ARATH Folylpolyglutamate synthase OS=Arabidopsis thaliana GN=FPGS1 PE=1 SV=1	FPGS1	53.81	4.7	12	2	2	0	25942	0	39921	48713	33064	0	37081	0	0	22508	21032	0	0	13961	0	0	0	0	0	0	0	0	0
Capana00g003720	N-acetyltransferase domain-containing protein	---	28.143	6.7	10	1	1	0	0	0	0	0	0	0	0	0	0	0	0	0	0	0	0	0	0	0	0	0	0	3746.3	0
Capana00g003749	HYES_PIG Epoxide hydrolase 2 OS=Sus scrofa GN=EPHX2 PE=2 SV=1	EPHX2	36.093	43.3	122	9	8	406830	388970	361100	332190	333050	325980	374290	363130	390430	366510	376790	367470	243580	239620	218330	248620	206970	228110	209050	173080	155730	364330	406910	415390
Capana00g003752	HYES_HUMAN Epoxide hydrolase 2 OS=Homo sapiens GN=EPHX2 PE=1 SV=2	EPHX2	34.377	60.6	205	13	10	591990	590960	572090	542520	539200	535860	567850	589460	514400	465290	441750	463440	656630	605230	637070	554630	548420	571200	505710	520610	514310	738900	767860	743510
Capana00g003764	ANM13_ARATH Probable histone-arginine methyltransferase 1.3 OS=Arabidopsis thaliana GN=PRMT13 PE=2 SV=3	PRMT13	54.105	30.5	50	10	9	206120	168150	128810	212790	142990	144170	110340	71017	70068	100470	98000	88590	159150	198840	162600	159440	163580	119890	95732	78751	136480	250640	281750	272170
Capana00g003768	proteoglycan 4-like	---	18.957	38.6	21	3	3	130760	130940	117290	118530	129790	119530	115940	174590	120590	106640	159360	175490	138890	133670	111010	82268	0	196890	96764	96562	91755	36831	0	49256
Capana00g003775	RAA5A_ARATH Ras-related protein RABA5a OS=Arabidopsis thaliana GN=RABA5A PE=2 SV=1	RABA5A	24.856	15.6	2	3	1	0	0	0	0	0	0	0	0	0	0	0	0	0	0	0	0	0	0	0	0	0	0	0	4070.1
Capana00g003776	MO25N_ARATH Putative MO25-like protein At5g47540 OS=Arabidopsis thaliana GN=At5g47540 PE=2 SV=1	At5g47540	39.533	12.6	30	4	1	46384	50112	50187	43313	48689	45303	46337	42782	42649	33975	30070	31847	39372	42578	40851	39938	44394	39527	41003	42459	37957	15980	0	16844
Capana00g003777	CYT5_ARATH Cysteine proteinase inhibitor 5 OS=Arabidopsis thaliana GN=CYS5 PE=2 SV=2	CYS5	13.735	20.5	2	2	2	0	0	0	0	0	0	0	0	0	0	0	0	0	0	0	126870	0	0	0	0	0	0	0	0
Capana00g003780	TM111_DANRE Transmembrane protein 111 OS=Danio rerio GN=tmem111 PE=2 SV=1	tmem111	27.893	43.7	64	7	7	100340	84436	57027	110510	122800	135220	109160	88629	87390	106250	97136	110020	115560	120010	134470	103010	107860	103370	75306	97564	107590	201330	187670	163360
Capana00g003781	major latex allergen Hev b 5-like	---	16.688	42.9	6	3	3	0	0	0	0	0	0	0	0	0	0	38912	26243	0	0	0	0	0	0	0	19501	0	0	0	0
Capana00g003783	RL6_MESCR 60S ribosomal protein L6 OS=Mesembryanthemum crystallinum GN=RPL6 PE=2 SV=1	RPL6	55.417	23.4	54	8	8	476480	458390	421500	401080	391870	430230	380250	343820	343360	413400	404650	360180	400480	423400	387760	416680	395300	432500	400860	407570	421530	223290	228310	174440
Capana00g003785	UGPA_SOLTU UTP--glucose-1-phosphate uridylyltransferase OS=Solanum tuberosum PE=1 SV=3	---	65.022	40.9	184	16	12	434550	398020	376290	421140	409280	389410	298370	316660	312820	338380	288560	315540	238670	275090	270400	283220	295050	291860	241680	221120	227160	302220	311110	354310
Capana00g003786	DCE_PETHY Glutamate decarboxylase OS=Petunia hybrida GN=GAD PE=1 SV=1	GAD	56.128	8.5	1	3	1	0	0	0	0	0	0	0	0	0	0	0	0	0	0	0	0	0	0	0	0	0	24129	0	0
Capana00g003796	GL17_ARATH Germin-like protein subfamily 1 member 7 OS=Arabidopsis thaliana GN=At3g05950 PE=2 SV=1	At3g05950	24.817	48.7	98	7	7	176680	124370	197590	222070	192890	232610	209070	166850	156150	204050	172150	225330	573560	616860	612750	447120	442690	421790	423700	427400	456700	826100	852330	850430
Capana00g003809	GPDA_ACIAD Glycerol-3-phosphate dehydrogenase [NAD(P)+] OS=Acinetobacter sp. (strain ADP1) GN=gpsA PE=3 SV=1	gpsA	51.543	5.6	12	2	2	17790	17375	17757	22034	17442	18902	0	14907	14639	15189	0	15991	18613	19795	18989	15071	16536	18055	15872	14963	14789	18108	0	17375
Capana00g003810	Putative ovule protein	---	19.346	23.7	1	2	2	0	0	0	0	0	0	0	0	0	0	0	0	0	0	0	0	0	0	0	4446.9	0	0	0	0
Capana00g003818	TCPQ_DICDI T-complex protein 1 subunit theta OS=Dictyostelium discoideum GN=cct8 PE=3 SV=1	cct8	58.344	54.3	322	19	19	2444500	2403500	2441900	2352000	2454300	2455800	2144200	2109300	2177000	2154900	2209700	2196900	2287600	2333600	2313800	2275400	2287800	2199700	2225000	2130400	2240000	1633000	1616500	1660400
Capana00g003823	KASC2_ARATH 3-oxoacyl-[acyl-carrier-protein] synthase II, chloroplastic OS=Arabidopsis thaliana GN=KAS2 PE=1 SV=1	KAS2	50.902	23.6	112	8	7	244100	221600	212250	242780	223120	221460	156540	148620	150820	101460	102230	108530	181490	185360	192890	190530	191340	187250	151670	163780	153570	143230	169540	148920
Capana00g003827	GLGL2_SOLTU Glucose-1-phosphate adenylyltransferase large subunit 2, chloroplastic/amyloplastic OS=Solanum tuberosum GN=AGPS2 PE=2 SV=1	AGPS2	57.374	12.6	8	4	4	53808	25029	0	25521	32982	0	0	17858	0	0	0	0	0	19584	15387	0	0	0	0	0	0	0	0	15471
Capana00g003838	SPSY_ARATH Spermine synthase OS=Arabidopsis thaliana GN=SPMS PE=1 SV=1	SPMS	38.377	35	61	7	7	149280	143930	131110	149230	137280	137490	98627	92184	99359	117940	106630	109130	139880	137990	145770	157950	141890	122400	105310	127860	106530	155150	183050	176240
Capana00g003850	FK202_ARATH Peptidyl-prolyl cis-trans isomerase FKBP20-2, chloroplastic OS=Arabidopsis thaliana GN=FKBP20-2 PE=1 SV=1	FKBP20-2	27.631	44.3	120	8	8	776320	755460	785220	764730	770560	788020	940800	792670	885680	938460	945910	879750	590880	550610	628970	626690	586400	567200	592750	585200	504150	823770	802050	790310
Capana00g003858	LEAF RUST 10 DISEASE-RESISTANCE LOCUS RECEPTOR-LIKE PROTEIN KINASE-like 2.1	---	35.513	5.1	1	1	1	0	0	0	0	0	0	0	0	0	0	0	0	0	0	0	0	0	0	0	0	0	0	0	10435
Capana00g003861	U369_DICDI UPF0369 protein OS=Dictyostelium discoideum GN=DDB_G0278459 PE=3 SV=1	DDB_G0278459	12.359	22.5	3	2	2	0	0	0	0	0	0	17288	0	0	0	0	0	0	0	0	0	0	0	0	0	0	0	0	0
Capana00g003863	GLUT1_ARATH Glutamate synthase 1 [NADH], chloroplastic OS=Arabidopsis thaliana GN=GLT1 PE=1 SV=2	GLT1	237.25	14.1	134	19	19	392420	346780	331780	236780	228030	190180	263640	197190	239470	277870	286080	261440	169850	175500	168140	246820	212650	232250	283370	266860	259920	108420	80562	105520
Capana00g003898	LARP1_HUMAN La-related protein 1 OS=Homo sapiens GN=LARP1 PE=1 SV=2	LARP1	59.102	12.6	14	4	4	0	0	39045	0	0	0	0	0	0	36574	34169	0	32258	35672	0	22459	0	0	31013	0	30041	0	47715	52071
Capana00g003922	Putative mitochondrial transcription termination factor family protein-like	---	19.335	24.1	61	3	3	100250	93522	91732	87525	90162	96765	89624	105420	96026	70694	70124	71652	105980	104760	101350	110150	98063	98578	95846	92593	97970	88734	86574	87305
Capana00g003943	VAP42_ARATH Vesicle-associated protein 4-2 OS=Arabidopsis thaliana GN=PVA42 PE=1 SV=1	PVA42	25.5	12.4	7	2	2	0	0	0	0	0	29523	0	0	0	27684	0	24676	0	26069	28743	35867	36869	0	0	0	29277	0	27633	0
Capana00g003944	GUN3_ARATH Endoglucanase 3 OS=Arabidopsis thaliana GN=CEL5 PE=2 SV=2	CEL5	44.62	15.8	7	3	3	0	0	0	0	0	54431	0	0	0	0	0	0	0	0	0	0	0	0	0	0	0	0	0	0
Capana00g003955	PLDA1_RICCO Phospholipase D alpha 1 OS=Ricinus communis GN=PLD1 PE=1 SV=1	PLD1	60.163	13.6	108	5	5	389470	389230	427150	436500	441320	446700	499100	476400	484820	385560	394970	382850	629780	620430	614300	532800	546000	560130	532110	545450	540650	455120	437880	431700
Capana00g003956	PLDA1_TOBAC Phospholipase D alpha 1 OS=Nicotiana tabacum GN=PLD1 PE=2 SV=2	PLD1	23.067	10.1	19	1	1	0	0	0	0	0	0	0	0	0	0	0	0	0	0	0	0	0	0	0	0	0	0	0	8888.6
Capana00g003958	EKIA_DICDI Probable ethanolamine kinase A OS=Dictyostelium discoideum GN=etnkA PE=3 SV=1	etnkA	42.831	6.5	2	2	2	0	0	0	0	0	20760	0	0	0	0	0	0	0	0	0	0	0	0	0	0	0	0	0	23857
Capana00g003961	MCE1_MOUSE mRNA-capping enzyme OS=Mus musculus GN=Rngtt PE=1 SV=1	Rngtt	68.039	4.9	4	2	2	0	0	0	0	0	0	0	0	0	0	0	0	0	0	0	0	10220	0	0	0	0	0	0	0
Capana00g003966	Y283_BACHD Uncharacterized isomerase BH0283 OS=Bacillus halodurans (strain ATCC BAA-125 / DSM 18197 / FERM 7344 / JCM 9153 / C-125) GN=BH0283 PE=3 SV=1	BH0283	32.072	5.4	4	1	1	0	0	0	0	0	0	0	0	0	0	0	0	0	0	0	0	0	0	0	0	0	0	0	6652
Capana00g003977	RR13_ARATH 30S ribosomal protein S13, chloroplastic OS=Arabidopsis thaliana GN=RPS13 PE=2 SV=1	RPS13	18.934	39.9	175	9	9	1155700	1218800	1173100	1311000	1249700	1337800	903020	857740	898190	1051500	985160	945890	1085300	1133900	1134400	905560	930930	975670	779040	800790	706430	684140	691580	721080
Capana00g004015	ASPL2_ARATH Aspartic proteinase-like protein 2 OS=Arabidopsis thaliana GN=At1g65240 PE=1 SV=2	At1g65240	24.347	24.5	36	3	3	54504	49253	47819	53433	60062	49542	56234	28944	53087	65944	60383	57984	42809	55830	54978	52948	57840	58564	49269	48505	49885	81072	83767	76699
Capana00g004018	ASPL2_ARATH Aspartic proteinase-like protein 2 OS=Arabidopsis thaliana GN=At1g65240 PE=1 SV=2	At1g65240	27.447	5.3	2	1	1	0	0	0	0	0	0	0	0	0	0	0	0	0	0	0	0	0	0	0	0	0	0	0	20857
Capana00g004021	Putative bypass of stop codon protein 1-like	---	33.846	26.1	56	5	5	198420	190800	143060	191630	162750	127730	207590	142850	191660	111310	118620	94287	175950	191870	172430	166490	154380	170910	150830	148100	177040	165040	163800	174410
Capana00g004055	MSIR6_DROME RNA-binding protein Musashi homolog Rbp6 OS=Drosophila melanogaster GN=Rbp6 PE=2 SV=3	Rbp6	55.543	14	28	5	4	44318	69472	45509	32695	31837	52350	0	40463	43915	65500	58065	47534	40624	50231	41941	0	26603	40361	41758	39482	43111	43272	34057	47794
Capana00g004062	OLA1_CHICK Obg-like ATPase 1 OS=Gallus gallus GN=OLA1 PE=2 SV=1	OLA1	44.4	55.8	341	19	19	1839800	1744600	1800800	1824500	1805800	1756800	1851100	1807000	1839500	1739400	1736800	1672200	1722700	1698300	1753000	1685100	1687600	1668800	1800600	1750200	1780400	1299000	1247800	1281200
Capana00g004067	meiotic spindle formation protein mei-1 isoform X2	---	39.896	9.2	12	2	2	0	0	0	0	0	0	0	0	0	0	0	0	0	0	0	0	0	0	0	0	14078	0	0	0
Capana00g004071	KEA3_ARATH K(+) efflux antiporter 3, chloroplastic OS=Arabidopsis thaliana GN=KEA3 PE=1 SV=2	KEA3	70.523	16.5	92	8	8	177600	159530	189540	215530	231190	228470	226820	222580	247960	223980	223130	238870	169190	191280	204150	151160	180280	181370	192940	187390	197870	180190	181230	178280
Capana00g004089	TILS_LISMF Bifunctional protein tilS/hprT OS=Listeria monocytogenes serotype 4b (strain F2365) GN=tilS/hprT PE=3 SV=1	tilS/hprT	22.052	20.5	33	3	3	48977	47581	47911	45026	44904	49332	45957	51335	43455	41779	40757	14545	37338	37000	35857	34523	35357	32483	32769	33043	39009	0	43223	53178
Capana00g004093	RR1_SPIOL 30S ribosomal protein S1, chloroplastic OS=Spinacia oleracea GN=RPS1 PE=1 SV=1	RPS1	58.1	26.7	88	10	10	152560	185080	172650	155320	140310	165640	216970	204270	196880	222230	173690	198680	210160	206020	194850	153200	197530	208670	256700	271290	287780	69728	98060	102470
Capana00g004102	DHR12_BOVIN Dehydrogenase/reductase SDR family member 12 OS=Bos taurus GN=DHRS12 PE=2 SV=1	DHRS12	35.088	34.9	86	6	6	198450	191040	199020	208840	191200	208010	184490	210490	202310	159520	180870	167310	215070	213090	238840	238750	202580	243210	208960	203140	182220	264580	269370	249300
Capana00g004113	RAB7_VIGAC Ras-related protein Rab7 OS=Vigna aconitifolia PE=2 SV=1	---	26.165	16.5	45	3	2	0	103490	108420	118500	119540	113870	113120	99252	99996	124320	132900	122750	112130	122190	115080	0	128080	124500	104850	96167	86465	113270	154260	0
Capana00g004118	NAC domain-containing protein	---	91.942	5.7	0	2	1	0	0	0	0	0	0	0	0	0	0	0	0	0	0	0	0	0	0	0	0	0	0	0	0
Capana00g004121	ARMC6_HUMAN Armadillo repeat-containing protein 6 OS=Homo sapiens GN=ARMC6 PE=1 SV=2	ARMC6	43.448	7	26	2	2	34317	38202	40425	38000	36459	0	40058	34728	40180	34770	30737	30425	40305	25944	41564	43068	0	45048	43100	39634	39008	0	0	0
Capana00g004135	GDL87_ARATH GDSL esterase/lipase At5g55050 OS=Arabidopsis thaliana GN=At5g55050 PE=2 SV=1	At5g55050	36.459	5.5	1	1	1	0	0	0	0	0	0	0	0	0	0	0	0	0	0	0	0	0	0	0	0	0	0	0	2942.5
Capana00g004150	SUI1_SALBA Protein translation factor SUI1 homolog OS=Salix bakko PE=3 SV=1	---	13.286	22	15	2	2	9248.1	0	13441	0	0	12360	0	0	0	0	0	0	0	0	0	0	0	0	0	0	0	0	0	0
Capana00g004151	THI41_VITVI Thiamine thiazole synthase 1, chloroplastic OS=Vitis vinifera GN=THI1-1 PE=3 SV=1	THI1-1	38.071	48.9	511	9	9	6457000	6863100	6909200	6207800	6394300	6199800	7480600	7503700	7836300	6195900	6307400	6297700	3792400	3818200	4000900	5193900	5345800	5210600	5401500	5368300	5362400	6303100	6339800	6393400
Capana00g004152	PME22_SOLLC Pectinesterase 2.2 OS=Solanum lycopersicum GN=PME2.2 PE=3 SV=1	PME2.2	60.166	23.9	90	6	6	583670	606830	683700	633720	602670	668710	675580	668610	703330	799610	841170	905610	915620	888870	995880	751710	799750	817100	612230	645340	698600	917820	991500	1016700
Capana00g004155	ENL1_ORYSJ Early nodulin-like protein 1 OS=Oryza sativa subsp. japonica GN=ENODL1 PE=1 SV=1	ENODL1	20.89	7.1	20	1	1	0	0	0	0	0	0	0	0	0	0	0	0	0	0	0	0	0	0	0	0	0	0	0	81028
Capana00g004156	PDI54_ORYSJ Protein disulfide isomerase-like 5-4 OS=Oryza sativa subsp. japonica GN=PDIL5-4 PE=2 SV=1	PDIL5-4	58.312	25.9	52	10	10	189270	153580	201900	177560	217960	199030	121090	111820	116340	126330	140200	111760	131070	172780	157920	130090	102610	111600	92705	94976	95553	196960	189990	161250
Capana00g004159	TRPB_CAMAC Tryptophan synthase beta chain 2, chloroplastic OS=Camptotheca acuminata GN=TSB PE=2 SV=1	TSB	43.755	20	24	5	1	0	0	0	0	0	0	0	0	0	0	0	0	0	0	0	0	0	0	0	0	0	0	0	78339
Capana00g004162	P2C55_ARATH Probable protein phosphatase 2C 55 OS=Arabidopsis thaliana GN=At4g16580 PE=2 SV=2	At4g16580	40.145	22.3	110	6	6	306660	260130	276900	247310	285240	284270	282730	285570	284550	270180	292810	276270	249910	249510	241210	304960	253590	262270	300970	305360	312660	298530	310960	329510
Capana00g004184	PPA18_ARATH Purple acid phosphatase 18 OS=Arabidopsis thaliana GN=PAP18 PE=2 SV=1	PAP18	83.448	10.6	20	5	4	0	0	0	0	0	0	0	0	0	0	0	0	0	0	0	0	0	0	0	0	0	0	0	120710
Capana00g004191	PLAT domain-containing protein	---	18.212	23.6	16	3	2	0	0	0	0	0	0	0	0	0	0	0	0	0	0	0	0	0	0	0	0	0	0	0	644990
Capana00g004192	OTU1_DANRE Ubiquitin thioesterase OTU1 OS=Danio rerio GN=yod1 PE=2 SV=1	yod1	20.801	44.4	62	6	6	214670	189070	176960	226450	230340	198580	172570	163810	179890	164120	195240	182100	186960	179490	181630	210560	196870	178180	202890	209770	192310	229850	222710	254980
Capana00g004193	CDPK2_MAIZE Calcium-dependent protein kinase 2 OS=Zea mays GN=CPK2 PE=2 SV=1	CPK2	58.011	47	254	16	15	989920	956930	904840	888710	901690	937610	874890	841010	873020	739850	745550	769270	823090	820220	810900	872750	850150	824510	831330	819460	818570	446370	499050	411830
Capana00g004197	ACOC_CUCMA Aconitate hydratase, cytoplasmic OS=Cucurbita maxima PE=2 SV=1	---	111.84	9.9	39	7	3	413640	335680	221210	448130	423580	357230	374570	297600	301800	0	0	270550	452460	497890	495880	473580	621190	541180	409820	369390	213940	410670	355020	342450
Capana00g004202	Protein cbp-1 like	---	13.941	26.4	9	3	3	0	0	0	0	0	0	0	0	0	0	73424	0	0	0	0	0	0	0	0	0	0	0	0	0
Capana00g004263	MFS domain-containing protein	---	28.055	5.8	4	1	1	0	0	0	0	0	0	0	0	0	3360.4	0	0	0	0	0	0	0	0	0	0	0	0	0	0
Capana00g004272	PSUG_BREBN Pseudouridine-5'-phosphate glycosidase OS=Brevibacillus brevis (strain 47 / JCM 6285 / NBRC 100599) GN=psuG PE=3 SV=1	psuG	40.949	14.5	64	4	4	66876	71121	68417	69027	63745	65697	63694	66873	66728	78200	74477	70195	70927	65817	76924	60434	64697	67480	68422	73875	74400	88093	87303	91452
Capana00g004277	ZOG_PHALU Zeatin O-glucosyltransferase OS=Phaseolus lunatus GN=ZOG1 PE=2 SV=1	ZOG1	52.999	21.8	23	7	2	0	0	66691	0	0	60754	0	59005	0	42846	34079	33553	41864	30072	43310	65149	24656	23634	15329	0	32316	95973	115770	87321
Capana00g004278	ZOG_PHALU Zeatin O-glucosyltransferase OS=Phaseolus lunatus GN=ZOG1 PE=2 SV=1	ZOG1	19.052	21	18	3	1	0	0	0	0	0	0	0	0	0	0	0	0	0	0	0	0	0	0	0	0	0	0	0	68382
Capana00g004284	SEPA_DICDI Serine/threonine-protein kinase sepA OS=Dictyostelium discoideum GN=sepA PE=2 SV=1	sepA	151.9	8.7	71	8	8	108350	94846	98247	86264	85801	85906	83742	94027	84862	68428	71150	63131	80400	84162	88256	73016	75069	88050	67987	69646	71060	41069	46908	48349
Capana00g004285	IF4A3_NICPL Eukaryotic initiation factor 4A-3 OS=Nicotiana plumbaginifolia PE=2 SV=1	---	36.168	39.9	156	9	9	1029200	1111300	1098200	1205000	1215500	1199600	938150	938630	921900	1070100	1046900	1076000	1021300	1030000	1078400	921110	939800	994640	981010	991450	921520	977450	966240	842670
Capana00g004288	Putative F3H9.20 protein-like	---	29.18	5.2	7	1	1	0	0	0	0	0	0	0	0	0	0	0	0	0	0	0	0	0	0	0	0	0	0	0	19105
Capana00g004290	Putative ovule protein	---	27.708	15.2	41	3	3	43517	55412	57726	47623	53351	54189	70527	70604	62481	53050	55708	51187	0	0	41883	31562	35979	42456	40836	43850	49713	47766	41396	43314
Capana00g004292	HIS8_TOBAC Histidinol-phosphate aminotransferase, chloroplastic OS=Nicotiana tabacum GN=HPA PE=2 SV=1	HPA	49.132	36.6	131	11	11	652780	705210	751040	726900	668270	679850	681610	626170	784630	612810	546280	625570	1057700	923420	981210	956170	902110	950700	894510	880550	856650	690230	680430	683260
Capana00g004299	Putative ovule protein	---	22.136	52.2	61	6	6	292250	298530	301490	314180	288580	294400	282690	277130	284550	334000	351920	310430	336120	315640	321570	276500	264360	303980	303340	308490	330930	451620	494810	458880
Capana00g004300	SIL1_BOVIN Nucleotide exchange factor SIL1 OS=Bos taurus GN=SIL1 PE=2 SV=1	SIL1	31.009	12.5	8	2	2	0	0	0	0	0	0	0	0	0	0	0	0	0	0	0	0	0	0	28029	32681	7534.3	0	0	38827
Capana00g004303	Y305_SYNY3 TVP38/TMEM64 family membrane protein slr0305 OS=Synechocystis sp. (strain PCC 6803 / Kazusa) GN=slr0305 PE=3 SV=1	slr0305	28.024	6.6	14	1	1	0	0	0	0	0	0	0	0	0	0	0	0	0	0	0	0	0	0	0	0	0	0	30622	0
Capana00g004305	MCM2_XENLA DNA replication licensing factor mcm2 OS=Xenopus laevis GN=mcm2 PE=1 SV=2	mcm2	95.681	9.4	17	6	6	89780	0	55739	0	0	69483	0	0	0	0	0	45176	0	0	0	93616	94635	55534	222010	204710	262330	0	0	0
Capana00g004310	Putative no exine formation 1-like	---	133.69	3.8	25	3	3	56661	46472	40017	45611	49790	32591	37904	45364	27384	35051	0	29772	46516	52692	47706	39148	0	0	34358	0	0	88247	53240	94597
Capana00g004313	FKB19_ARATH Peptidyl-prolyl cis-trans isomerase FKBP19, chloroplastic OS=Arabidopsis thaliana GN=FKBP19 PE=1 SV=1	FKBP19	71.37	45.7	304	21	21	2143200	2061900	2081100	2211200	2166700	2139100	2018800	1997600	1985700	2543600	2683000	2585500	2176600	2181500	2273700	2328700	2257300	2223700	2258800	2307800	2210700	3018800	3198300	3181500
Capana00g004314	ALIX_DICDI ALG-2 interacting protein X OS=Dictyostelium discoideum GN=alxA PE=1 SV=1	alxA	68.875	21.8	65	9	8	190470	260940	262530	247970	244420	288630	297970	287990	303030	217960	153340	173700	274180	260500	291810	244310	287260	269410	244230	264740	251890	137390	184670	164270
Capana00g004315	PALA_CRYNJ pH-response regulator protein palA/RIM20 OS=Cryptococcus neoformans var. neoformans serotype D (strain JEC21 / ATCC MYA-565) GN=RIM20 PE=3 SV=1	RIM20	29.89	14.9	26	3	3	25354	30520	36807	29719	24225	31969	29753	29768	40216	17743	0	16116	37529	22453	37292	31834	24219	34770	28762	23017	28441	0	0	0
Capana00g004323	ATPBM_NICPL ATP synthase subunit beta, mitochondrial OS=Nicotiana plumbaginifolia GN=ATPB PE=1 SV=1	ATPB	59.824	70.9	126	27	5	1499400	1339700	1343500	1371700	1390400	1262800	1484300	1610900	1588900	1854700	1767700	1889800	1452400	1300000	1435300	1301000	1362600	1364500	1501200	1458900	1700500	1865600	2014700	1978600
Capana00g004374	ARNA_SERP5 Bifunctional polymyxin resistance protein ArnA OS=Serratia proteamaculans (strain 568) GN=arnA PE=3 SV=1	arnA	43.267	78.6	415	21	14	3643500	3448100	3449800	3750800	3816000	3686400	1721100	1716500	1671500	2502300	2486300	2490700	2928500	2909700	2943400	3552900	3316600	3334400	2779400	2879000	2858800	7137200	7450500	7531500
Capana00g004417	CNOT3_HUMAN CCR4-NOT transcription complex subunit 3 OS=Homo sapiens GN=CNOT3 PE=1 SV=1	CNOT3	14.873	21.3	15	2	2	41687	41053	41299	0	0	37427	36170	0	0	41067	39084	41613	38525	0	0	42019	40007	40616	41107	0	0	0	0	32002
Capana00g004419	CNOT3_MOUSE CCR4-NOT transcription complex subunit 3 OS=Mus musculus GN=Cnot3 PE=1 SV=1	Cnot3	58.71	13.1	40	3	3	61780	68249	39766	50718	36645	38805	25139	18887	20222	0	22815	59731	34743	40800	28448	82396	46992	0	54229	0	0	0	36338	55727
Capana00g004429	ODO2B_ARATH Dihydrolipoyllysine-residue succinyltransferase component of 2-oxoglutarate dehydrogenase complex 2, mitochondrial OS=Arabidopsis thaliana GN=At4g26910 PE=1 SV=2	At4g26910	41.779	23.6	18	6	3	236500	239480	260380	0	201210	199200	0	239270	282150	254750	228920	0	226480	258770	0	282390	261400	0	312090	298130	314590	202260	206560	200710
Capana00g004435	FBK67_ARATH F-box/kelch-repeat protein At3g23880 OS=Arabidopsis thaliana GN=At3g23880 PE=2 SV=1	At3g23880	46.722	18.8	84	6	6	252690	289840	291210	341320	248840	276350	324190	382340	384750	292860	309180	360910	273280	314970	359320	330170	305570	276440	385740	327870	370990	161400	177150	161560
Capana00g004440	FTSH_CYACA ATP-dependent zinc metalloprotease FtsH OS=Cyanidium caldarium GN=ftsH PE=3 SV=1	ftsH	52.377	39.8	159	12	12	390500	391860	381840	375890	361470	353530	463600	460740	475720	353780	356430	326010	315300	323280	324850	368980	370410	369960	393840	396930	383340	124890	140110	129810
Capana00g004441	FTSH_THET1 ATP-dependent zinc metalloprotease FtsH OS=Thermobaculum terrenum (strain ATCC BAA-798 / YNP1) GN=ftsH PE=3 SV=1	ftsH	44.529	15.1	34	5	5	104170	81451	76208	76528	79335	71429	100820	91262	95116	70545	84884	71706	58677	64704	52673	96150	79542	75846	99016	89857	71869	38158	0	55175
Capana00g004442	ILVB2_TOBAC Acetolactate synthase 2, chloroplastic OS=Nicotiana tabacum GN=ALS SURB PE=1 SV=1	ALS	71.339	36.9	280	14	14	1392300	1271800	1299500	1255800	1249100	1202600	835090	815460	885490	967860	945650	940190	1152000	1132600	1193000	1081600	1070700	1021300	970760	998470	937850	1758500	1779700	1796300
Capana00g004446	TTC33_DANRE Tetratricopeptide repeat protein 33 OS=Danio rerio GN=ttc33 PE=2 SV=1	ttc33	12.719	15	2	1	1	0	0	0	0	0	0	0	0	0	0	0	0	0	0	0	0	0	0	0	0	0	0	10686	0
Capana00g004448	CAMT3_ARATH Probable caffeoyl-CoA O-methyltransferase At4g26220 OS=Arabidopsis thaliana GN=At4g26220 PE=2 SV=1	At4g26220	31.752	22.3	88	5	4	205410	233950	221470	260890	248790	278050	262320	246500	276780	302230	311500	312260	242400	244770	221100	214960	223470	243400	192750	217820	212530	416010	276270	412510
Capana00g004460	MGTA_MYCTU GDP-mannose-dependent alpha-mannosyltransferase OS=Mycobacterium tuberculosis GN=mgtA PE=1 SV=1	mgtA	55.874	13.1	12	4	4	41519	42859	40018	35618	0	55488	33120	32812	37490	19868	0	0	39432	42952	38634	45175	62560	41255	49040	50195	57222	20408	0	0
Capana00g004467	HBPL1_ARATH Heme-binding-like protein At3g10130, chloroplastic OS=Arabidopsis thaliana GN=At3g10130 PE=1 SV=1	At3g10130	22.615	49.5	74	7	6	226180	215210	200770	232770	224700	243850	231600	257760	271300	268090	287690	248630	158710	178210	191720	180490	186900	167830	162470	180710	168080	308140	325820	343040
Capana00g004469	NtEIG-E80 protein	---	19.898	33.5	13	4	4	0	0	0	0	0	0	0	0	0	0	0	0	0	0	0	0	0	0	0	0	0	245530	217580	209950
Capana00g004478	GSTX1_TOBAC Probable glutathione S-transferase OS=Nicotiana tabacum PE=2 SV=1	---	25.124	19.5	44	4	2	76313	72117	108540	56126	0	58900	68935	0	87826	83361	87067	84589	91646	75937	79596	79616	77987	72325	76681	73253	75890	105430	108780	107320
Capana00g004496	PSA4_PETHY Proteasome subunit alpha type-4 OS=Petunia hybrida GN=PAC1 PE=2 SV=1	PAC1	25.656	9.8	19	2	2	0	0	0	0	0	0	0	0	0	0	0	0	0	0	0	0	0	0	0	0	0	0	0	164990
Capana00g004516	ADT2_SOLTU ADP,ATP carrier protein, mitochondrial (Fragment) OS=Solanum tuberosum GN=ANT1 PE=2 SV=1	ANT1	40.034	26.3	70	9	5	631180	682310	685480	739530	694990	758750	695950	752800	672450	629550	661970	637800	829010	799430	778400	735300	739620	746480	597750	628150	610670	1156700	1094700	1104900
Capana00g004556	RISA_SCHPO Riboflavin synthase alpha chain OS=Schizosaccharomyces pombe (strain 972 / ATCC 24843) GN=rib5 PE=1 SV=1	rib5	31.662	33.1	107	7	5	443300	520710	549270	548030	566650	591060	692630	656840	628940	772150	729960	698830	499550	493060	507610	459560	467080	519870	459890	449490	458120	794930	765190	721510
Capana00g004559	PRP6_MOUSE Pre-mRNA-processing factor 6 OS=Mus musculus GN=Prpf6 PE=2 SV=1	Prpf6	114.83	6.2	42	4	4	59350	59223	56072	55919	54333	49281	50190	47877	53790	45684	0	58317	34978	46440	36876	57623	54867	49936	63340	63769	65306	0	0	51820
Capana00g004560	POR_DAUCA Protochlorophyllide reductase, chloroplastic OS=Daucus carota GN=POR1 PE=2 SV=1	POR1	43.079	62.3	383	17	15	4376600	4319900	3948100	4110300	4113300	4099000	3415100	3530500	3637100	3335100	3265700	3259300	4328700	4274700	4296600	3637200	3611600	3563400	3343700	3350300	3231400	3641200	3516100	3563300
Capana00g004571	Y1360_ARATH Thylakoid lumenal protein At1g03610, chloroplastic OS=Arabidopsis thaliana GN=At1g03600 PE=1 SV=1	At1g03600	18.958	41.6	98	6	6	454120	510000	542320	502860	620200	587830	1011300	817310	798010	1145700	973990	1182400	987800	915050	976920	597500	700130	829150	1048300	1075400	1241800	2302700	1746600	1592000
Capana00g004605	RB15B_HUMAN Putative RNA-binding protein 15B OS=Homo sapiens GN=RBM15B PE=1 SV=3	RBM15B	17.73	14	7	1	1	0	0	0	0	0	0	0	0	0	0	0	0	0	0	0	0	0	0	0	0	0	0	0	12335
Capana00g004606	FPA_ARATH Flowering time control protein FPA OS=Arabidopsis thaliana GN=FPA PE=2 SV=2	FPA	87.832	20.3	48	10	10	176000	178840	199760	153570	159790	157390	127810	119180	91912	199950	131870	154550	139470	144230	150450	153130	110960	139060	158930	148580	163190	172180	196060	197960
Capana00g004623	CAPP_SOLTU Phosphoenolpyruvate carboxylase OS=Solanum tuberosum GN=PPC1 PE=2 SV=2	PPC1	105.12	48.6	144	34	14	294070	363540	372800	328090	320030	367990	490270	479800	466130	355110	370620	365740	389760	343320	365210	474970	464210	417870	544120	514080	506070	80340	106200	98687
Capana00g004629	RT4I1_BOVIN Reticulon-4-interacting protein 1, mitochondrial OS=Bos taurus GN=RTN4IP1 PE=2 SV=1	RTN4IP1	39.656	33.2	109	7	7	229630	213790	219750	233000	230470	232360	230420	216010	213130	231810	217010	242660	235960	243800	227290	241630	239480	239820	220770	212050	212690	273890	279740	283600
Capana00g004640	Putative ovule protein	---	19.171	32.4	35	4	4	266600	212470	317810	183640	199780	246070	198640	206180	244890	112080	205520	209680	220360	221820	263750	286420	304190	187580	181800	216090	191070	339120	412460	352580
Capana00g004656	PEAM1_ARATH Phosphoethanolamine N-methyltransferase 1 OS=Arabidopsis thaliana GN=NMT1 PE=2 SV=1	NMT1	54.454	10.5	11	4	4	0	34034	32752	0	0	22013	28184	31501	31548	0	25159	0	67654	51775	41331	41487	39219	35125	42005	41955	49538	0	0	0
Capana00g004657	ALL8_OLEEU Calcium-binding allergen Ole e 8 OS=Olea europaea PE=1 SV=1	---	17.581	38	37	4	4	71862	64421	72113	66219	53861	61228	74181	92444	66247	58833	63987	59588	66716	61356	69067	66982	68401	66294	81970	82644	79692	51947	50807	52396
Capana00g004660	CTR1_ARATH Serine/threonine-protein kinase CTR1 OS=Arabidopsis thaliana GN=CTR1 PE=1 SV=1	CTR1	112.47	8.7	25	4	3	64759	58019	49693	44213	53261	39708	40353	49913	44916	37962	0	0	107110	41903	37796	49261	48777	52173	45725	36856	54178	0	0	0
Capana00g004661	MPK9_ARATH Mitogen-activated protein kinase 9 OS=Arabidopsis thaliana GN=MPK9 PE=2 SV=2	MPK9	68.366	9.8	14	4	3	79357	81259	83353	0	78914	92956	76910	77410	85073	69223	59382	0	73712	0	72881	99359	76641	64277	68232	70990	73372	0	54619	0
Capana00g004663	GBLP_NICPL Guanine nucleotide-binding protein subunit beta-like protein OS=Nicotiana plumbaginifolia PE=2 SV=1	---	36.135	74.8	491	19	8	6296800	6346100	6394900	7186200	7080100	7014400	4463400	4543400	4579900	5663000	5626200	5581300	6057500	6076000	6160700	5552700	5615600	5507100	4209500	4127100	4090400	7284000	7441600	7540900
Capana00g004664	Putative microbial collagenase-like	---	25.336	35	114	8	8	437560	475890	498430	528020	513760	538030	606480	560530	571460	447630	446010	464470	633100	638410	663000	631140	682540	670400	509080	489580	498100	810990	765840	800040
Capana00g004665	GST23_MAIZE Glutathione transferase GST 23 OS=Zea mays PE=2 SV=1	---	25.879	17.9	25	3	3	111010	59483	96243	104080	57068	100940	117640	62469	105360	131060	28747	116550	8030.9	0	0	23432	16729	0	0	9886.4	0	0	0	0
Capana00g004669	RS7_AVIMR 40S ribosomal protein S7 OS=Avicennia marina GN=RPS7 PE=2 SV=1	RPS7	43.623	22.3	24	6	2	0	0	0	0	0	0	0	0	0	0	0	0	0	0	0	0	0	0	0	0	0	0	0	361320
Capana00g004676	Putative ovule protein	---	20.463	35.7	89	4	4	439760	456620	415760	365440	377230	369640	454460	430900	468320	452120	503800	494310	484780	508440	494670	414500	398250	431990	489370	463960	485040	468730	521830	521390
Capana00g004678	2AAB_ARATH Serine/threonine-protein phosphatase 2A 65 kDa regulatory subunit A beta isoform OS=Arabidopsis thaliana GN=PP2AA2 PE=1 SV=2	PP2AA2	64.74	48.2	382	19	15	1884900	1929300	1816600	1651400	1649800	1644000	1768200	1763600	1799100	1442800	1419300	1416600	1549300	1579800	1569100	1768400	1804400	1750900	1840600	1793800	1775100	783880	757800	714950
Capana00g004680	CASP_ARATH Protein CASP OS=Arabidopsis thaliana GN=CASP PE=1 SV=2	CASP	68.953	17.6	40	7	7	1826200	2110500	2125100	1134200	1560500	1659000	2241700	1989500	2050000	1732500	1994300	1947600	1299100	1067300	1112900	1921100	1751700	1700600	2614800	2340500	2300200	0	0	0
Capana00g004682	DUF295 domain-containing protein	---	13.272	12.9	0	1	1	0	0	0	0	0	0	0	0	0	0	0	0	0	0	0	0	0	0	0	0	0	0	0	0
Capana00g004689	LS14A_PONAB Protein LSM14 homolog A OS=Pongo abelii GN=LSM14A PE=2 SV=1	LSM14A	70.06	2.8	5	1	1	0	0	0	0	0	0	0	0	0	0	0	0	0	0	0	0	0	0	0	0	0	0	8789.1	0
Capana00g004693	NC2B_ARATH Protein Dr1 homolog OS=Arabidopsis thaliana GN=DR1 PE=2 SV=1	DR1	15.462	15.9	4	1	1	0	0	0	0	0	0	0	0	0	0	0	0	0	0	0	0	0	0	0	0	0	0	0	6753.8
Capana00g004700	AAMP_BOVIN Angio-associated migratory cell protein OS=Bos taurus GN=AAMP PE=2 SV=1	AAMP	42.705	11.3	31	3	3	42384	53802	51662	43376	40577	36550	50984	44153	0	16618	0	24481	30721	34978	36931	32261	40489	0	0	42985	48990	0	0	0
Capana00g004704	GEK1_ARATH D-aminoacyl-tRNA deacylase OS=Arabidopsis thaliana GN=GEK1 PE=1 SV=2	GEK1	36.501	25.7	60	6	6	110810	114180	103990	90296	119970	96382	99858	97043	84438	129130	120780	124110	80323	90605	91394	112310	89513	80634	92586	91062	90376	180840	183070	205550
Capana00g004710	SH3 domain-containing protein	---	97.411	12.3	71	7	7	104860	118140	112690	89090	85233	74127	150830	139540	137780	92653	83817	79418	80376	62394	68796	119730	108700	107010	115940	74070	130450	30428	54451	22458
Capana00g004711	SH3 domain-containing protein (Fragment)	---	36.532	30.7	60	6	6	632620	443880	590330	505080	474530	960440	748960	625780	515210	503310	512350	442600	256590	365750	420930	638260	581650	464840	647080	605360	669640	640840	0	0
Capana00g004712	C3H55_ORYSJ Zinc finger CCCH domain-containing protein 55 OS=Oryza sativa subsp. japonica GN=Os08g0135800 PE=2 SV=1	Os08g0135800	148.51	3.5	27	3	3	512410	440800	346650	339990	351780	347760	0	258840	278720	303980	297470	317500	376620	337510	357100	379820	337510	0	428380	343160	350310	277700	306050	275850
Capana00g004716	GLPQ_ECOLI Glycerophosphoryl diester phosphodiesterase OS=Escherichia coli (strain K12) GN=glpQ PE=1 SV=2	glpQ	46.24	21.4	78	6	6	223490	208040	221250	210730	210010	207700	243380	250440	254920	254400	252010	252400	229850	235770	225700	216850	232300	240960	214600	222670	199860	259840	251410	247840
Capana00g004717	HELC1_HUMAN Activating signal cointegrator 1 complex subunit 3 OS=Homo sapiens GN=ASCC3 PE=1 SV=3	ASCC3	175.44	2.8	30	3	3	26893	27324	23140	0	18993	17956	21452	22937	24775	11989	14927	15971	0	0	0	17448	0	17407	0	18787	19368	0	0	0
Capana00g004724	BCCP2_ARATH Biotin carboxyl carrier protein of acetyl-CoA carboxylase 2, chloroplastic OS=Arabidopsis thaliana GN=BCCP2 PE=1 SV=1	BCCP2	27.699	20.6	87	4	4	465910	598140	593710	554930	534870	618600	602790	618170	569370	733460	720700	718600	690910	672230	710360	568870	634970	661390	748030	771850	759830	827300	815020	725930
Capana00g004727	UGDH_SOYBN UDP-glucose 6-dehydrogenase OS=Glycine max PE=2 SV=1	---	53.043	18.1	5	6	2	0	0	0	0	254890	190190	0	0	0	0	0	173000	0	147610	0	0	0	0	0	0	219970	0	485450	411130
Capana00g004734	SUBL_ARATH Subtilisin-like protease OS=Arabidopsis thaliana GN=ARA12 PE=1 SV=1	ARA12	59.172	2.4	0	1	1	0	0	0	0	0	0	0	0	0	0	0	0	0	0	0	0	0	0	0	0	0	0	0	0
Capana00g004749	ZB14_MAIZE 14 kDa zinc-binding protein OS=Zea mays GN=ZBP14 PE=1 SV=1	ZBP14	18.598	55.1	113	7	7	1132800	1098000	1023500	1122800	1085100	1053800	1273200	1309500	1261000	1327500	1308900	1273600	670040	672670	666450	930110	883820	826300	1211800	1228100	1160700	831700	757770	786820
Capana00g004765	NCB5R_NEOFI NADH-cytochrome b5 reductase 1 OS=Neosartorya fischeri (strain ATCC 1020 / DSM 3700 / FGSC A1164 / NRRL 181) GN=cbr1 PE=3 SV=2	cbr1	30.974	62.6	231	12	12	1457100	1427300	1548200	1582000	1543800	1584700	1352500	1406800	1347300	1351000	1319000	1335700	1436000	1409400	1543000	1320500	1522800	1507600	1080200	1156900	1110200	2025300	1970000	1989500
Capana00g004767	CAAT2_ARATH Cationic amino acid transporter 2, vacuolar OS=Arabidopsis thaliana GN=CAT2 PE=1 SV=1	CAT2	67.352	3.9	15	1	1	0	0	0	0	0	0	0	0	0	0	0	0	0	0	0	0	0	0	0	0	0	0	0	12012
Capana00g004768	probable zinc metalloprotease EGY1, chloroplastic	---	58.388	16.9	94	5	5	196100	206230	192010	200680	201320	196570	180570	185830	190470	151160	151630	169870	246670	226350	234640	225350	225250	215150	172780	164440	169650	184330	207090	209790
Capana00g004769	Putative ovule protein	---	19.472	13	4	1	1	0	0	0	0	0	0	0	0	0	0	0	0	0	0	0	0	0	0	0	0	0	7358.6	0	0
Capana00g004772	METE_CATRO 5-methyltetrahydropteroyltriglutamate--homocysteine methyltransferase OS=Catharanthus roseus GN=METE PE=2 SV=1	METE	84.538	59.1	1070	40	29	22210000	21950000	21689000	19975000	19431000	19589000	19410000	19562000	19766000	21912000	21491000	21469000	18261000	18421000	18427000	17644000	18183000	18189000	18970000	19281000	18900000	11481000	12097000	12104000
Capana00g004774	VA0D_ORYSJ Probable V-type proton ATPase subunit d OS=Oryza sativa subsp. japonica GN=Os01g0587000 PE=2 SV=1	Os01g0587000	54.922	27.9	140	10	10	380810	363630	354550	434920	399650	401700	355910	360380	358010	365800	363230	346770	402990	413210	404790	393180	385240	392530	338120	359800	369170	367700	350950	358390
Capana00g004775	VA0D2_ARATH V-type proton ATPase subunit d2 OS=Arabidopsis thaliana GN=VHA-D2 PE=2 SV=1	VHA-D2	23.406	24.3	82	2	2	242920	226220	207830	237040	268080	242170	188410	193880	186200	162850	178780	173950	195770	177200	170030	232230	227120	206610	183750	173640	165280	136880	146660	175810
Capana00g004780	TRN1_DATST Tropinone reductase 1 OS=Datura stramonium GN=TR1 PE=1 SV=1	TR1	28.367	6.9	14	2	1	0	0	0	0	0	0	0	0	0	0	0	0	0	0	0	0	0	0	0	0	0	0	0	70476
Capana00g004783	SY131_ARATH Putative syntaxin-131 OS=Arabidopsis thaliana GN=SYP131 PE=2 SV=1	SYP131	35.716	12.8	51	4	4	147510	136340	135000	112210	128390	119640	135050	124580	139680	128000	131110	113580	125510	123510	119790	130900	130880	126760	149770	139550	152400	65423	76491	74651
Capana00g004784	Protein-lysine N-methyltransferase	---	73.71	10.9	19	4	4	1209400	868800	984970	1315200	308330	531730	0	0	0	0	0	0	677380	0	0	779430	0	855630	0	0	0	1078400	0	1131500
Capana00g004785	UBP12_ARATH Ubiquitin carboxyl-terminal hydrolase 12 OS=Arabidopsis thaliana GN=UBP12 PE=1 SV=2	UBP12	119.47	29.4	79	20	10	271060	216940	238310	201490	165380	191230	219890	212860	201050	170270	188490	188910	189600	170010	158260	194170	218750	197470	255830	191310	204430	65283	102470	69461
Capana00g004788	METE_CATRO 5-methyltetrahydropteroyltriglutamate--homocysteine methyltransferase OS=Catharanthus roseus GN=METE PE=2 SV=1	METE	42.528	12.6	1	3	1	0	0	0	0	0	0	0	0	0	0	0	0	0	0	0	0	0	0	9185.6	0	0	0	0	0
Capana00g004799	CDPK3_ARATH Calcium-dependent protein kinase 3 OS=Arabidopsis thaliana GN=CPK3 PE=1 SV=1	CPK3	43.683	25.9	101	7	7	134360	135280	120540	121990	121150	112990	129230	116100	142390	124020	137710	123120	116080	118180	106770	103710	98848	121850	130420	119490	118550	88498	76723	86601
Capana00g004800	CDPK3_ARATH Calcium-dependent protein kinase 3 OS=Arabidopsis thaliana GN=CPK3 PE=1 SV=1	CPK3	26.202	29.4	42	5	5	202020	123770	122840	107880	114690	109850	91385	82428	82357	104670	86038	85865	67105	96510	97354	75096	70567	71777	89127	84472	78866	88833	83058	61833
Capana00g004805	CRTSO_SOLLC Prolycopene isomerase, chloroplastic OS=Solanum lycopersicum GN=CRTISO PE=1 SV=1	CRTISO	51.331	29.6	154	9	9	343020	345540	329830	348700	340020	340430	322420	321520	332270	216970	217770	212530	360910	383510	377960	387870	357580	389720	324910	332050	320710	273750	285850	248760
Capana00g004806	SPP2_TOBAC Sucrose-phosphatase 2 OS=Nicotiana tabacum GN=SPP2 PE=2 SV=1	SPP2	47.875	44.2	154	12	12	274970	265210	243730	268120	236160	239490	273940	268940	262990	170190	176820	175730	534270	527030	517820	545690	536400	508370	456120	439060	430460	375230	410860	405980
Capana00g004819	CRK10_ARATH Cysteine-rich receptor-like protein kinase 10 OS=Arabidopsis thaliana GN=CRK10 PE=1 SV=3	CRK10	34.889	4.2	0	1	1	0	0	0	0	0	0	0	0	0	0	0	0	0	0	0	0	0	0	0	0	0	0	0	0
Capana00g004820	FLA17_ARATH Fasciclin-like arabinogalactan protein 17 OS=Arabidopsis thaliana GN=FLA17 PE=2 SV=1	FLA17	48.553	3.8	2	1	1	0	0	0	0	0	0	0	0	0	0	0	0	0	0	0	0	0	0	0	0	0	0	21405	0
Capana00g004821	protein WVD2-like 4 isoform X1	---	39.671	11.1	9	2	2	24227	23149	18339	25364	26203	26120	21289	18652	0	28577	25660	31366	0	0	0	0	0	0	0	0	0	0	0	0
Capana00g004833	Expp1 protein	---	26.794	27.9	73	6	6	206540	185410	198710	237460	196060	184150	153590	160940	147980	167000	167100	169350	175290	172050	157500	184460	150260	134750	128280	106100	134060	230360	311030	321940
Capana00g004834	RFA2_SCHPO Replication factor A protein 2 OS=Schizosaccharomyces pombe (strain 972 / ATCC 24843) GN=ssb2 PE=1 SV=1	ssb2	29.411	18.2	15	3	3	29747	0	36757	38952	25521	0	0	0	0	33341	46107	45611	0	25446	24645	25376	18982	0	32085	30242	29689	47519	49657	43964
Capana00g004845	VPS11_DICDI Vacuolar protein sorting-associated protein 11 homolog OS=Dictyostelium discoideum GN=vps11 PE=3 SV=1	vps11	108.04	11.2	72	8	8	196670	190300	182830	159510	148180	135000	178400	188890	181050	130920	108180	115180	150210	154390	151000	190100	175580	172640	171090	171800	164450	0	49624	43047
Capana00g004847	RAA2A_ARATH Ras-related protein RABA2a OS=Arabidopsis thaliana GN=RABA2A PE=2 SV=1	RABA2A	24.155	36.7	40	5	4	71223	73097	0	68757	64243	68164	35964	36887	44017	0	38691	48413	72924	63846	60836	52983	71310	61668	0	0	32379	84180	82397	77670
Capana00g004875	PTR9_ARATH Probable peptide/nitrate transporter At1g22540 OS=Arabidopsis thaliana GN=At1g22540 PE=2 SV=1	At1g22540	62.649	4.4	22	2	2	30556	32102	34321	39888	42378	42632	26423	38850	26600	17296	18148	19756	21675	22886	20669	29889	29429	27544	16785	17229	19747	28301	28205	42661
Capana00g004882	RFA2_MOUSE Replication protein A 32 kDa subunit OS=Mus musculus GN=Rpa2 PE=1 SV=1	Rpa2	26.598	20.7	34	4	4	129310	177200	127220	219810	144060	183570	78033	117760	81083	48614	210750	259380	94513	121080	95510	133800	121310	113990	88656	93680	96829	179340	279130	240060
Capana00g004883	PATL2_ARATH Patellin-2 OS=Arabidopsis thaliana GN=PATL2 PE=1 SV=2	PATL2	63.255	63.5	331	28	24	2096000	1907300	1901500	1745300	1715300	1638300	2071300	2019000	2109700	2261500	2246500	2228600	1357200	1340100	1343800	1765500	1729600	1597400	1975500	1959500	1761700	662470	807850	770650
Capana00g004901	SRF5_ARATH Protein STRUBBELIG-RECEPTOR FAMILY 5 OS=Arabidopsis thaliana GN=SRF5 PE=2 SV=1	SRF5	77.171	2.4	57	1	1	1243900	1160500	0	1144100	985250	949880	1197300	1210800	1040500	825990	808960	822150	906410	942550	925400	1291600	981620	1051300	918310	267780	853200	692910	0	740240
Capana00g004904	VATA_DAUCA V-type proton ATPase catalytic subunit A OS=Daucus carota PE=2 SV=1	---	68.707	56.2	16	23	6	20142	0	23878	0	0	13035	29612	19811	26342	0	0	0	43933	47265	28163	27228	41250	34381	28076	29963	32220	0	0	26496
Capana00g004910	Putative pyridoxamine 5'-phosphate oxidase family protein-like	---	44.782	21.7	70	5	5	628720	597840	452250	444750	426220	409460	497990	504330	518690	422630	431610	291390	436110	493950	286450	315910	508640	517670	400590	364840	327610	657990	699390	634410
Capana00g004915	Y1491_ARATH DUF246 domain-containing protein At1g04910 OS=Arabidopsis thaliana GN=At1g04910 PE=1 SV=1	At1g04910	45.392	20.3	28	4	3	158960	155140	109930	172240	162030	150030	43849	0	60472	58908	45230	0	40780	63922	60429	80892	115180	67819	47877	47243	0	52643	69815	66967
Capana00g004916	Putative WD repeat-containing protein 49-like	---	36.763	8.2	12	2	2	74152	0	0	0	52875	79286	0	0	46999	0	55832	47522	0	0	0	0	0	0	0	47435	0	44897	43341	48809
Capana00g004931	PRS7A_ARATH 26S protease regulatory subunit 7 homolog A OS=Arabidopsis thaliana GN=RPT1A PE=2 SV=1	RPT1A	44.774	50.9	181	15	5	1617300	1608200	1635800	1579800	1594000	1548200	1443400	1399300	1516900	1445000	1431100	1409200	1429900	1462600	1471000	1439600	1435300	1496600	1377000	1438100	1349300	1218000	1007900	1123700
Capana00g004932	SCRM2_ARATH Transcription factor SCREAM2 OS=Arabidopsis thaliana GN=SCRM2 PE=1 SV=1	SCRM2	17.562	17.1	8	2	2	0	0	0	0	0	0	0	0	0	0	0	0	0	0	0	33182	0	0	0	0	0	0	0	0
Capana00g004936	CLAH1_ARATH Clathrin heavy chain 1 OS=Arabidopsis thaliana GN=CHC1 PE=1 SV=1	CHC1	184.49	38.1	604	43	16	2541600	2527700	2664900	2148900	2131800	2143100	3066700	3029400	3041900	2560300	2664500	2592600	2084200	2069100	2112200	2742400	2759400	2845500	3092800	3145800	3047900	899160	981250	915810
Capana00g004943	FUT12_ARATH Putative fucosyltransferase-like protein OS=Arabidopsis thaliana GN=FUT12 PE=2 SV=1	FUT12	21.532	12.4	1	1	1	3977.3	0	0	0	0	0	0	0	0	0	0	0	0	0	0	0	0	0	0	0	0	0	0	0
Capana00g004947	CLPR1_ARATH ATP-dependent Clp protease proteolytic subunit-related protein 1, chloroplastic OS=Arabidopsis thaliana GN=CLPR1 PE=1 SV=1	CLPR1	42.621	32.6	169	10	10	1741400	1882200	1734200	1734300	1761200	1778200	1882500	1892900	2049700	1822200	1857900	1851900	2140200	2094200	2125600	2276000	2214900	2118200	2089700	2086800	2060400	2256500	2365000	2263600
Capana00g004955	KIRO_ACTDE Kirola OS=Actinidia deliciosa PE=1 SV=1	---	17.775	46.8	91	7	7	701490	638530	666130	641360	607880	624250	619470	583130	622310	696560	745550	710170	1072500	1067800	1062900	1203400	1157100	1132900	1225400	1231800	1231700	1217300	1311900	1308400
Capana00g004972	USP_CUCME UDP-sugar pyrophospharylase OS=Cucumis melo GN=USP PE=1 SV=1	USP	54.688	31.3	109	9	9	237780	225670	213750	225880	226130	213810	214800	217680	215080	218110	217220	220360	152600	149640	148150	150660	150050	150630	144820	141990	143560	184900	180190	191570
Capana00g004977	NDHM_POPJC NAD(P)H-quinone oxidoreductase subunit M, chloroplastic OS=Populus jackii GN=ndhM PE=2 SV=1	ndhM	24.3	59.1	154	8	8	1828200	1729400	1562000	1571800	1436700	1439000	1673700	1727900	1796100	1836200	1834400	1988100	1409800	1404300	1463000	1426500	1475800	1424100	1399200	1426800	1322200	1399600	1496600	1613600
Capana00g005003	LOW QUALITY PROTEIN: probable zinc metalloprotease EGY2, chloroplastic	---	35.834	25.5	66	5	5	450570	478400	444280	525360	450350	445830	426200	453560	433840	274290	356400	386140	454690	462380	380340	571530	473210	482380	358210	319420	344710	460390	609470	529180
Capana00g005005	HERC1_HUMAN Probable E3 ubiquitin-protein ligase HERC1 OS=Homo sapiens GN=HERC1 PE=1 SV=2	HERC1	18.154	54.2	41	5	5	0	39493	41880	68326	74507	72177	65889	47679	0	61046	63697	60235	53162	61359	78995	61270	52445	35657	34036	29926	35895	102710	120460	101070
Capana00g005006	HERC4_MOUSE Probable E3 ubiquitin-protein ligase HERC4 OS=Mus musculus GN=Herc4 PE=2 SV=2	Herc4	16.04	76.9	104	9	9	209830	198170	198410	225370	234190	223630	168120	153970	173800	181110	176360	177630	190850	198900	203840	191800	150500	170430	124170	125370	125840	233210	238760	204890
Capana00g005022	AGT21_ARATH Alanine--glyoxylate aminotransferase 2 homolog 1, mitochondrial OS=Arabidopsis thaliana GN=AGT2 PE=1 SV=1	AGT2	51.054	66	410	19	19	1295300	1244900	1176700	1293000	1199400	1198800	1095100	1134900	1132100	1058600	1043500	1015900	999940	1026700	1037200	1242500	1177200	1140800	879200	830830	819800	1188600	1240600	1281800
Capana00g005031	arginine/serine-rich coiled-coil protein 2 isoform X2	---	55.982	7	21	2	2	42329	47925	0	43265	0	52285	0	22905	26868	0	38566	38199	28805	24079	0	0	22747	0	0	32576	0	0	35450	0
Capana00g005034	PTBP3_ARATH Polypyrimidine tract-binding protein homolog 3 OS=Arabidopsis thaliana GN=At1g43190 PE=2 SV=1	At1g43190	23.478	40.8	19	4	3	43403	23241	28563	29867	30863	29709	0	0	16015	0	10241	0	22520	15397	15290	18744	16918	16870	14187	13757	11330	13214	13923	0
Capana00g005035	PTBP3_ARATH Polypyrimidine tract-binding protein homolog 3 OS=Arabidopsis thaliana GN=At1g43190 PE=2 SV=1	At1g43190	16.22	19.3	24	2	2	0	0	0	31981	42541	28257	15909	27025	0	0	0	0	29002	27280	28222	20802	0	17128	0	0	23554	27661	0	0
Capana00g005036	GLTB1_ARATH Ferredoxin-dependent glutamate synthase 1, chloroplastic OS=Arabidopsis thaliana GN=GLU1 PE=1 SV=2	GLU1	129.24	65.3	1092	64	64	25825000	25153000	25241000	22192000	22695000	22323000	32569000	31773000	31714000	24471000	24536000	24849000	20466000	20887000	20293000	22188000	21463000	21688000	22050000	22382000	22864000	9283200	9478000	9310000
Capana00g005037	GLTB_SPIOL Ferredoxin-dependent glutamate synthase, chloroplastic OS=Spinacia oleracea PE=1 SV=3	---	44.226	53.9	399	14	14	8925600	8556300	8955400	7946900	8140700	8266900	11734000	11112000	11059000	9007700	8820900	9279300	7326700	7254600	7374000	7771200	7616900	7395200	7662000	7541000	8078700	3275100	3254900	3437500
Capana00g005040	RK16_ATRBE 50S ribosomal protein L16, chloroplastic OS=Atropa belladonna GN=rpl16 PE=3 SV=1	rpl16	13.203	48.3	92	4	4	1511300	1498200	1412700	1709300	1679200	1638300	1222800	1220200	1223900	957610	924920	904600	1561900	1524900	1544200	1474200	1465700	1415800	966840	960920	973060	1096900	1111700	1165500
Capana00g005041	RK14_NICTO 50S ribosomal protein L14, chloroplastic OS=Nicotiana tomentosiformis GN=rpl14 PE=3 SV=1	rpl14	13.56	59.8	146	7	7	2058200	1974300	1959400	2315600	2207300	2276800	2152200	2112900	2085400	2526200	2558400	2538700	2191900	2072100	2022400	2128100	1916700	1994000	1980100	1973800	1871300	3399200	3475400	3490100
Capana00g005043	RPOA_SOLTU DNA-directed RNA polymerase subunit alpha OS=Solanum tuberosum GN=rpoA PE=3 SV=1	rpoA	38.636	24.9	76	5	5	319520	312430	283560	333870	319660	298200	209040	190810	202020	209190	177670	140570	292000	279740	294240	285010	260960	273170	186700	196050	184200	292200	260630	255910
Capana00g005045	URH2_ARATH Probable uridine nucleosidase 2 OS=Arabidopsis thaliana GN=URH2 PE=2 SV=1	URH2	21.595	33.3	69	4	4	72993	68952	67685	75612	77023	79670	69898	67315	65461	90694	89353	89314	72895	75663	72310	72583	69351	67865	68290	68105	65401	109660	115900	120300
Capana00g005046	URH2_ARATH Probable uridine nucleosidase 2 OS=Arabidopsis thaliana GN=URH2 PE=2 SV=1	URH2	17.114	20	39	2	2	47700	44035	45580	51381	46334	51952	45270	45504	44542	57623	57783	56975	41469	47986	46010	0	39940	37384	41244	37952	39069	72886	67822	75538
Capana00g005054	Putative hyp O-arabinosyltransferase-like	---	40.694	12.3	13	2	2	0	25138	25033	28792	24317	24992	15867	0	0	0	0	0	22069	0	21940	0	0	0	0	0	0	23476	22145	32405
Capana00g005060	RL18A_CASSA 60S ribosomal protein L18a OS=Castanea sativa GN=RPL18A PE=2 SV=1	RPL18A	21.451	42.7	2	7	1	0	0	0	0	0	0	0	0	0	0	0	0	0	0	0	0	0	0	0	0	0	0	3177.2	0
Capana00g005088	PGAP3_XENTR Post-GPI attachment to proteins factor 3 OS=Xenopus tropicalis GN=pgap3 PE=2 SV=1	pgap3	39.709	5.2	19	1	1	0	0	0	0	0	0	0	0	0	0	0	0	0	0	0	0	0	0	0	0	0	0	0	68762
Capana00g005089	RH7_SPIOL DEAD-box ATP-dependent RNA helicase 7 OS=Spinacia oleracea GN=RH7 PE=2 SV=1	RH7	74.014	12	12	4	4	81170	61541	88577	38685	42998	0	0	0	0	0	28042	0	0	31185	39913	0	0	0	0	0	27466	0	0	0
Capana00g005100	TBB1_MAIZE Tubulin beta-1 chain OS=Zea mays GN=TUBB1 PE=2 SV=1	TUBB1	50.207	61.4	127	22	4	708240	852370	756130	806500	723810	692340	665010	654500	625600	249620	247210	274240	885060	828960	883680	880630	881950	817790	863270	1003300	984390	233940	236180	233150
Capana00g005101	REMO_SOLTU Remorin OS=Solanum tuberosum PE=1 SV=1	---	20.062	26.4	10	4	4	0	0	63376	91237	86636	70181	82131	81989	75244	170040	137870	66031	79644	82893	62352	33758	74316	81032	89343	88166	106910	88047	63531	0
Capana01g000010	SSG1_SOLTU Granule-bound starch synthase 1, chloroplastic/amyloplastic OS=Solanum tuberosum GN=WAXY PE=1 SV=1	WAXY	60.965	37.5	112	13	12	0	32384	58434	98626	75951	87632	554790	399310	552360	297470	185310	210220	39870	0	0	391660	401600	385250	467020	429160	394170	388390	332290	348590
Capana01g000017	RK11_ARATH 50S ribosomal protein L11, chloroplastic OS=Arabidopsis thaliana GN=RPL11 PE=1 SV=1	RPL11	23.364	40.1	72	6	6	1329800	1526200	1745300	1742100	1840100	1825800	1942100	1915500	1930600	2057800	2077400	2037800	1966700	1923300	2001100	1638700	1849200	1876100	1929700	2056300	1961900	2707100	2792900	2716800
Capana01g000018	IPYR_SOLTU Soluble inorganic pyrophosphatase OS=Solanum tuberosum GN=PPA PE=2 SV=1	PPA	23.654	41.5	37	6	2	194160	191670	168280	136690	172840	174740	146990	144680	169000	245460	228950	252530	120720	57399	73929	0	0	0	43159	0	0	109120	71438	84397
Capana01g000037	PPA27_ARATH Probable inactive purple acid phosphatase 27 OS=Arabidopsis thaliana GN=PAP27 PE=2 SV=1	PAP27	64.758	22.6	103	10	7	283120	248050	272530	267000	271140	251800	227500	227050	230910	244910	239570	244320	226480	228930	228630	236380	239290	226120	147200	177860	150680	286110	296320	310800
Capana01g000049	EMB8_PICGL Embryogenesis-associated protein EMB8 OS=Picea glauca GN=EMB8 PE=2 SV=1	EMB8	30.656	14.4	12	2	2	13474	0	0	0	0	0	0	0	0	0	0	0	0	0	0	0	0	0	0	0	0	0	0	0
Capana01g000051	EMB8_PICGL Embryogenesis-associated protein EMB8 OS=Picea glauca GN=EMB8 PE=2 SV=1	EMB8	23.232	7.6	6	1	1	0	0	0	0	0	0	0	0	0	0	0	0	0	0	0	0	0	0	0	0	0	0	0	20138
Capana01g000052	Hop-interacting protein THI002	---	60.157	44.1	127	12	12	256510	295600	268700	243320	239270	230360	258600	253790	255730	252230	282900	257750	236990	226240	236060	264510	252580	257140	284930	280140	271980	132670	124000	139130
Capana01g000053	YSL1_ARATH Metal-nicotianamine transporter YSL1 OS=Arabidopsis thaliana GN=YSL1 PE=2 SV=2	YSL1	74.165	2.7	3	1	1	0	0	0	0	0	0	0	0	0	0	0	0	0	0	0	0	0	0	0	0	0	0	0	8147.9
Capana01g000056	FRAY2_DICDI Serine/threonine-protein kinase fray2 OS=Dictyostelium discoideum GN=fray2 PE=3 SV=1	fray2	73.351	8.2	16	3	2	42857	22770	0	0	0	16092	0	17465	0	0	0	0	21830	0	0	15535	0	0	0	0	0	0	14962	0
Capana01g000059	Putative ovule protein	---	24.956	14	7	2	2	26268	24628	26507	27287	15737	14203	0	0	17508	0	0	0	18790	0	21819	32312	0	21930	0	21075	0	18533	0	29236
Capana01g000060	ATAD1_RAT ATPase family AAA domain-containing protein 1 OS=Rattus norvegicus GN=Atad1 PE=1 SV=1	Atad1	40.275	16.3	11	4	2	18058	0	17525	17481	19592	17832	14700	0	16855	0	0	0	18225	18296	18519	21480	18530	19564	17117	18050	18158	14405	17830	0
Capana01g000061	Putative ovule protein	---	27.409	15.3	40	3	3	119070	88217	72643	101860	69593	80673	116950	122080	110040	103560	111950	91223	88902	97187	116590	105810	104300	131870	75005	86631	0	101610	0	83749
Capana01g000063	FAF2B_XENLA FAS-associated factor 2-B OS=Xenopus laevis GN=faf2-b PE=2 SV=1	faf2-b	51.07	11.3	40	3	3	117670	121000	109430	97187	91619	93347	76726	82426	88979	87353	94111	86028	95106	97874	86137	106960	102850	86403	96991	91152	87268	58767	85780	76226
Capana01g000075	AB3F_ARATH ABC transporter F family member 3 OS=Arabidopsis thaliana GN=ABCF3 PE=2 SV=1	ABCF3	80.357	30.7	125	16	16	1229100	1395700	1386900	1191600	1228800	1332200	1331600	1374900	1318800	1153900	941100	1159000	1014300	941750	1192700	1182600	1243200	1234000	1214600	1183100	1287700	673920	563780	540230
Capana01g000077	NADE_YEAST Glutamine-dependent NAD(+) synthetase OS=Saccharomyces cerevisiae (strain ATCC 204508 / S288c) GN=QNS1 PE=1 SV=1	QNS1	78.677	10.6	32	5	5	58033	54486	63653	66834	0	80646	76200	77930	91431	0	55221	51155	55820	77912	66060	86384	66661	71116	84626	68953	63375	45761	19544	0
Capana01g000078	BIP_SOLLC Luminal-binding protein OS=Solanum lycopersicum PE=2 SV=1	---	73.451	46.2	649	27	11	10888000	10711000	10700000	9851300	9412800	9454900	10220000	10268000	10198000	12861000	13224000	13159000	10431000	10471000	10221000	9997600	10016000	10003000	12991000	12694000	12626000	7163700	7080100	6937900
Capana01g000088	NPHP3_HUMAN Nephrocystin-3 OS=Homo sapiens GN=NPHP3 PE=1 SV=1	NPHP3	66.101	31.1	164	12	12	421800	415940	439760	400980	415160	383960	343450	386320	364390	319530	325470	300490	363370	363610	333140	412380	377290	371420	385380	373820	331500	101240	137470	116540
Capana01g000095	BR44L_HUMAN Brain protein 44-like protein OS=Homo sapiens GN=BRP44L PE=1 SV=1	BRP44L	11.738	20	2	2	2	0	0	0	0	0	0	0	0	0	0	0	0	0	0	0	0	0	0	0	0	0	0	17724	0
Capana01g000098	SRP19_ORYSJ Signal recognition particle 19 kDa protein OS=Oryza sativa subsp. japonica GN=SRP19 PE=1 SV=1	SRP19	15.239	13.3	21	1	1	0	0	0	0	0	0	0	0	0	0	0	0	0	0	0	0	0	0	0	0	0	0	0	35920
Capana01g000102	RP12A_ARATH 26S proteasome non-ATPase regulatory subunit RPN12A OS=Arabidopsis thaliana GN=RPN12A PE=1 SV=1	RPN12A	28.964	56.8	219	10	10	1252200	1253300	1236200	1200900	1204300	1239000	1147600	1149600	1148500	1150900	1175000	1173800	1115000	1104400	1131100	1078800	1096800	1097700	1096800	1056800	1112000	1224500	1210500	1211500
Capana01g000104	RR6_ARATH 30S ribosomal protein S6 alpha, chloroplastic OS=Arabidopsis thaliana GN=RPS6 PE=1 SV=1	RPS6	21.416	30.7	64	4	4	129330	511720	485590	595210	491180	457290	530710	607540	661130	766540	630510	641880	676160	661380	579810	622140	127450	601510	238230	761190	688110	1063100	894800	805790
Capana01g000106	CSLG3_ARATH Cellulose synthase-like protein G3 OS=Arabidopsis thaliana GN=CSLG3 PE=2 SV=2	CSLG3	60.637	14.4	23	4	2	0	0	0	0	0	0	0	0	0	0	0	0	50112	47036	50356	68785	66509	59117	40852	0	31813	40841	42995	47165
Capana01g000107	CSLG3_ARATH Cellulose synthase-like protein G3 OS=Arabidopsis thaliana GN=CSLG3 PE=2 SV=2	CSLG3	25.905	14.8	12	2	2	0	0	0	0	0	0	0	0	0	0	0	0	42164	0	43083	0	38639	0	38876	30870	36111	0	49680	0
Capana01g000108	CSLG3_ARATH Cellulose synthase-like protein G3 OS=Arabidopsis thaliana GN=CSLG3 PE=2 SV=2	CSLG3	42.076	19	12	4	2	0	102360	98540	102080	97637	83343	104110	86350	98915	70007	0	56756	133250	192500	133580	154010	161530	192060	126420	137610	89223	145080	130260	179840
Capana01g000115	Glutaredoxin domain-containing protein	---	44.875	32.8	131	10	10	330010	304180	285180	311640	326910	300780	343440	334200	356920	242080	262320	232320	263270	265420	282980	317680	292070	271880	297620	302610	293170	218040	244820	233300
Capana01g000117	KELP_ARATH RNA polymerase II transcriptional coactivator KELP OS=Arabidopsis thaliana GN=KELP PE=1 SV=1	KELP	19.657	25.1	42	4	4	47140	62281	58291	56202	56900	52857	43491	40777	41880	90196	84848	54292	68595	57851	62960	71185	65292	72136	115150	85642	81166	0	42298	0
Capana01g000118	Putative ovule protein	---	18.002	34.5	35	4	4	333650	449360	402610	329240	326070	366710	401570	119500	439250	457870	458750	401550	397000	464610	469930	415720	469800	451050	498930	488560	542740	482850	481410	495490
Capana01g000121	FTSH8_ARATH ATP-dependent zinc metalloprotease FTSH 8, chloroplastic OS=Arabidopsis thaliana GN=FTSH8 PE=1 SV=1	FTSH8	91.364	21.5	120	11	11	314930	296360	289680	283260	270510	272920	338340	329740	353830	244640	232710	224570	252870	259890	241130	292800	278370	269670	279090	303730	294810	85982	71009	86381
Capana01g000144	RTNLB_ARATH Reticulon-like protein B2 OS=Arabidopsis thaliana GN=RTNLB2 PE=1 SV=1	RTNLB2	30.446	28.9	150	6	5	901830	841290	848800	831040	818260	813770	719150	657050	693140	857630	851650	811190	909530	864940	858770	930490	948370	883550	882430	868680	873980	935800	935860	965410
Capana01g000146	YJNA_SCHPO Uncharacterized AAA domain-containing protein C24B10.10c OS=Schizosaccharomyces pombe (strain 972 / ATCC 24843) GN=SPCC24B10.10c PE=2 SV=1	SPCC24B10.10c	75.809	7.1	9	3	3	0	0	0	0	0	0	0	0	0	0	0	0	0	13341	0	0	0	0	0	0	0	0	0	0
Capana01g000149	GDT11_ARATH GDT1-like protein 1, chloroplastic OS=Arabidopsis thaliana GN=At1g64150 PE=2 SV=2	At1g64150	48.523	2.7	2	1	1	0	0	0	0	0	0	0	0	0	0	0	0	0	0	0	0	0	0	0	0	0	0	18887	0
Capana01g000156	VATE_CITLI V-type proton ATPase subunit E OS=Citrus limon GN=VATE PE=2 SV=1	VATE	29.663	55.4	264	11	7	2912600	2731300	2665300	2706100	2694700	2675900	2876300	2903500	2906500	3032800	3111800	3027500	2540200	2402300	2498300	2525100	2419700	2471000	2679600	2685700	2822500	2530200	2735600	2574200
Capana01g000162	EF118_ARATH Ethylene-responsive transcription factor ERF118 OS=Arabidopsis thaliana GN=ERF118 PE=2 SV=1	ERF118	57.426	2.8	17	1	1	0	0	0	0	0	0	0	0	0	0	0	0	0	0	0	0	0	0	0	0	0	0	0	33097
Capana01g000166	GUN_PHAVU Endoglucanase OS=Phaseolus vulgaris PE=2 SV=2	---	55.735	6.1	8	2	2	0	0	0	0	0	0	0	0	0	0	0	0	37466	0	30156	21082	21709	22540	19271	0	22415	27397	30565	32838
Capana01g000174	ISPF_CATRO 2-C-methyl-D-erythritol 2,4-cyclodiphosphate synthase, chloroplastic OS=Catharanthus roseus GN=ISPF PE=2 SV=1	ISPF	24.481	37.9	215	7	7	1274400	1333400	1502700	1625900	1520200	1583100	1783900	1747800	1776600	1943400	1843200	1790900	1600300	1607100	1500500	1510200	1507000	1540400	1815800	1804800	1855000	2461300	2443600	2317700
Capana01g000177	MDARP_ARATH Monodehydroascorbate reductase, chloroplastic OS=Arabidopsis thaliana GN=At1g63940 PE=2 SV=3	At1g63940	53.805	58.6	367	18	18	2680700	2539800	2580000	2859700	2816000	2831100	2858700	2881200	2852400	3118800	3085900	3200300	3315900	3159000	3174300	3120600	3025600	3049000	2914300	3066100	3073400	3681300	3695800	3633500
Capana01g000182	PYRB2_PEA Aspartate carbamoyltransferase 2, chloroplastic OS=Pisum sativum GN=PYRB2 PE=2 SV=1	PYRB2	45.202	22.5	27	6	6	133640	134940	0	0	169950	159980	146590	148840	149210	168820	205200	164690	175980	169760	183980	144600	181370	172550	152850	162710	138280	174090	163360	228640
Capana01g000185	MPK4_ARATH Mitogen-activated protein kinase 4 OS=Arabidopsis thaliana GN=MPK4 PE=1 SV=2	MPK4	43.709	8.7	7	2	1	0	0	0	0	0	0	0	0	0	0	0	0	0	0	0	0	0	0	0	0	0	0	0	9995.2
Capana01g000186	PGLR_VITVI Probable polygalacturonase OS=Vitis vinifera GN=GSVIVT00026920001 PE=1 SV=1	GSVIVT00026920001	53.203	24.4	54	6	6	64906	70039	116720	102740	133300	128600	137080	97593	133480	121090	121690	126360	150590	167130	192780	158360	142500	171250	138660	137820	141860	159780	156770	180640
Capana01g000191	TIM21_BOVIN Mitochondrial import inner membrane translocase subunit Tim21 OS=Bos taurus GN=TIMM21 PE=2 SV=1	TIMM21	35.266	6.9	9	2	2	30176	34295	38050	41997	40475	42955	35204	0	34268	42699	44575	41434	46671	44958	45852	39124	45663	39682	0	38517	40797	55684	74636	52921
Capana01g000193	GOGC6_ARATH Golgin candidate 6 OS=Arabidopsis thaliana GN=GC6 PE=1 SV=2	GC6	98.913	15.5	67	9	9	135510	147240	131660	128050	140680	124680	247290	240870	235420	118160	90542	74769	177360	155790	167660	190910	211890	209900	287450	274750	277780	64869	46122	60745
Capana01g000196	Y1385_ARATH BTB/POZ domain-containing protein At1g63850 OS=Arabidopsis thaliana GN=At1g63850 PE=1 SV=1	At1g63850	72.077	1.7	6	1	1	0	0	0	0	0	0	0	0	0	0	0	0	0	0	0	0	0	0	0	0	0	0	0	231370
Capana01g000201	GPN1_DICDI GPN-loop GTPase 1 homolog OS=Dictyostelium discoideum GN=xab1 PE=3 SV=1	xab1	34.519	4.9	11	1	1	0	0	0	0	0	0	0	0	0	0	0	0	0	0	0	0	0	0	0	0	27274	0	0	0
Capana01g000202	APBLC_ARATH Beta-adaptin-like protein C OS=Arabidopsis thaliana GN=BETAC-AD PE=1 SV=2	BETAC-AD	48.424	34.9	116	11	9	268090	317310	267870	242020	175160	247850	274640	252190	296390	164300	238420	220270	243490	220330	192010	205810	269630	244810	216320	253810	237960	89433	162700	54263
Capana01g000206	CDKD1_ORYSJ Cyclin-dependent kinase D-1 OS=Oryza sativa subsp. japonica GN=CDKD-1 PE=1 SV=1	CDKD-1	45.63	4.2	2	1	1	0	0	0	0	0	0	0	0	0	0	0	0	0	0	0	0	0	0	0	0	0	0	0	5067
Capana01g000217	HAL3A_ARATH Phosphopantothenoylcysteine decarboxylase OS=Arabidopsis thaliana GN=HAL3A PE=1 SV=1	HAL3A	23.162	30.1	28	4	4	183430	238110	227090	201960	206400	219110	181080	53402	180110	197360	202960	131450	146250	182670	190100	140310	214680	149250	159590	131740	154910	308880	281170	283890
Capana01g000218	GSTT1_ARATH Glutathione S-transferase T1 OS=Arabidopsis thaliana GN=GSTT1 PE=2 SV=1	GSTT1	21.154	8.6	8	1	1	0	0	0	0	0	0	0	0	0	0	0	0	0	0	0	0	0	0	0	0	0	0	0	6983.2
Capana01g000219	GSTT1_ARATH Glutathione S-transferase T1 OS=Arabidopsis thaliana GN=GSTT1 PE=2 SV=1	GSTT1	28.348	40.8	61	6	5	174530	158980	173540	174630	170400	166150	93384	114860	116330	118450	122790	116920	107170	102980	103160	101240	97738	87152	77877	77517	72933	120830	132650	127850
Capana01g000221	GSTT1_ARATH Glutathione S-transferase T1 OS=Arabidopsis thaliana GN=GSTT1 PE=2 SV=1	GSTT1	27.338	48.5	157	8	7	572550	548230	552060	579080	559580	577020	453470	443820	447610	422430	405880	405980	437870	426560	417380	419120	358900	414110	298960	329580	301470	468670	559470	487210
Capana01g000225	GPX4_SOLLC Probable phospholipid hydroperoxide glutathione peroxidase OS=Solanum lycopersicum GN=GPXle-1 PE=2 SV=1	GPXle-1	26.259	26.7	40	4	4	132480	147960	148830	157890	166800	176640	168740	164330	176060	197480	215690	209830	0	163240	167990	183280	184820	175090	195380	196030	203760	229440	212560	210860
Capana01g000239	GSH1_SOLLC Glutamate--cysteine ligase, chloroplastic OS=Solanum lycopersicum GN=GSH1 PE=2 SV=1	GSH1	59.314	36.6	216	12	12	959970	936330	953450	937420	905020	932890	1040100	1013200	1039900	1059300	1008700	1057200	998330	1045400	1068200	1106500	1056800	1027500	1045800	1108900	1061900	1277200	1059500	1189800
Capana01g000243	AMPN_ECOLI Aminopeptidase N OS=Escherichia coli (strain K12) GN=pepN PE=1 SV=2	pepN	113.08	68.4	1219	50	50	10396000	9879600	9984300	10020000	9936000	9845600	11024000	10913000	10819000	10534000	10376000	10356000	10881000	10851000	11139000	11488000	11532000	11586000	10931000	10977000	10947000	7412300	7541200	7669300
Capana01g000248	C86A2_ARATH Cytochrome P450 86A2 OS=Arabidopsis thaliana GN=CYP86A2 PE=2 SV=1	CYP86A2	60.774	15.8	34	5	5	39880	49479	38829	56976	29400	47476	137870	0	59284	23820	0	0	176370	215200	207080	190570	180880	197260	167360	153650	176530	99905	82886	122980
Capana01g000249	TIC32_PEA Short-chain dehydrogenase TIC 32, chloroplastic OS=Pisum sativum GN=TIC32 PE=1 SV=1	TIC32	25.418	37.1	60	5	5	45713	47223	48775	46975	47959	43190	32151	27382	40468	40241	48336	43711	42086	49427	39462	42410	37850	39354	36772	47951	36780	94832	97395	97028
Capana01g000250	PIP1_SOLLC Probable aquaporin PIP-type pTOM75 OS=Solanum lycopersicum PE=2 SV=1	---	28.218	41.2	211	9	2	5029200	4921800	4824900	5762100	5806700	5701800	4796100	4687000	4900000	5660000	6189600	5797900	5983400	5800300	6160500	5449700	5236300	5433200	4463600	4511300	4231400	10285000	10617000	11066000
Capana01g000251	PSL1_CHICK Signal peptide peptidase-like 2B OS=Gallus gallus GN=SPPL2B PE=2 SV=1	SPPL2B	90.08	4.3	7	2	2	0	0	0	0	0	0	0	0	0	0	0	0	0	0	0	0	0	0	74852	0	0	0	0	0
Capana01g000253	GUAA_BRAHW GMP synthase [glutamine-hydrolyzing] OS=Brachyspira hyodysenteriae (strain ATCC 49526 / WA1) GN=guaA PE=3 SV=1	guaA	21.307	28.5	73	4	4	208540	212020	217530	223030	215780	220320	145990	146350	155020	171130	165210	166420	174470	178790	181860	162120	168640	164370	145160	148930	155400	144200	178300	186750
Capana01g000254	GUAA_CARHZ GMP synthase [glutamine-hydrolyzing] OS=Carboxydothermus hydrogenoformans (strain Z-2901 / DSM 6008) GN=guaA PE=3 SV=1	guaA	14.81	29.6	33	2	2	127550	89048	107910	118010	126820	119610	78855	75238	90521	60805	68521	79832	81263	0	60504	75426	67103	59551	60831	46948	56536	79696	63747	64307
Capana01g000255	GUAA_RHOP2 GMP synthase [glutamine-hydrolyzing] OS=Rhodopseudomonas palustris (strain HaA2) GN=guaA PE=3 SV=1	guaA	29.268	39.5	95	7	7	346040	337990	338110	376360	361090	367430	252720	298950	290070	282560	305360	287780	304410	261510	263150	272260	255150	295440	246630	272870	241410	219240	286370	302370
Capana01g000274	RH47_ARATH DEAD-box ATP-dependent RNA helicase 47, mitochondrial OS=Arabidopsis thaliana GN=RH47 PE=1 SV=2	RH47	59.693	7.5	23	3	3	26262	40197	29032	0	27469	27260	24110	0	18200	28974	25956	23392	24557	23327	27246	20958	21301	23891	36079	32535	30774	21751	27338	21812
Capana01g000276	GALE1_ARATH UDP-glucose 4-epimerase 1 OS=Arabidopsis thaliana GN=At1g12780 PE=1 SV=2	At1g12780	39.224	64.7	198	15	15	529920	532340	549490	752220	730170	723450	527250	516340	518120	745350	703430	719880	494930	491930	489820	353080	362700	369200	354290	320260	315320	335550	354170	364260
Capana01g000279	TLP_ACTDE Thaumatin-like protein OS=Actinidia deliciosa GN=tlp PE=1 SV=2	tlp	25.083	14.8	11	2	2	0	0	0	0	0	0	0	0	0	0	0	0	0	22460	37901	0	0	0	0	20441	0	44753	38173	43861
Capana01g000280	TLP_ACTDE Thaumatin-like protein OS=Actinidia deliciosa GN=tlp PE=1 SV=2	tlp	24.958	7	2	1	1	0	0	0	0	0	0	0	0	0	0	0	0	0	0	0	0	0	0	0	0	0	0	0	10454
Capana01g000283	OS81_SOLCO Osmotin-like protein OSML81 OS=Solanum commersonii PE=2 SV=1	---	27.154	33.9	41	5	4	0	0	39556	0	54430	0	0	0	0	71045	61479	59978	235710	220760	228350	164240	193350	202120	157720	153480	159210	482800	381210	366840
Capana01g000284	OS13_SOLCO Osmotin-like protein OSML13 OS=Solanum commersonii PE=2 SV=1	---	26.792	48.4	80	6	4	160840	160660	167000	212570	209250	190710	113320	96332	162700	228440	250020	212530	441220	418960	413470	375460	382470	250130	285730	277060	298190	729520	743580	735170
Capana01g000285	OS35_SOLCO Osmotin-like protein OSML15 OS=Solanum commersonii PE=2 SV=1	---	27.435	45.6	117	6	6	289390	307850	295990	359340	350340	358770	191650	209800	206500	395610	392610	390070	960750	912620	969200	775280	764320	727810	675290	687440	704710	2071900	2132100	2085600
Capana01g000289	ERG3_ORYSJ Elicitor-responsive protein 3 OS=Oryza sativa subsp. japonica GN=ERG3 PE=2 SV=1	ERG3	14.87	58.6	56	6	6	369360	390780	406440	339900	343050	136430	330050	347460	262930	408480	421730	400710	393010	373030	373540	410910	381740	334080	433540	412580	318480	240220	247870	273060
Capana01g000290	MBD6_ARATH Methyl-CpG-binding domain-containing protein 6 OS=Arabidopsis thaliana GN=MBD6 PE=1 SV=1	MBD6	232.41	2.9	5	4	4	0	0	0	16415	0	0	0	0	0	0	0	0	0	0	19997	0	0	0	0	0	0	0	0	16454
Capana01g000293	SELH_MACFA Selenoprotein H OS=Macaca fascicularis GN=SELH PE=2 SV=2	SELH	19.818	27.5	69	6	6	214990	200550	204700	200120	205260	208650	140180	140910	148070	189330	190060	199850	132160	130980	130670	203730	178790	169570	170090	172740	172660	200010	224760	234420
Capana01g000303	RHDF1_DANRE Inactive rhomboid protein 1 OS=Danio rerio GN=rhbdf1 PE=2 SV=1	rhbdf1	36.891	6.3	21	1	1	0	0	0	0	0	0	0	0	0	0	0	0	0	0	0	0	0	0	0	0	0	0	0	94081
Capana01g000304	RFC2_BOVIN Replication factor C subunit 2 OS=Bos taurus GN=RFC2 PE=2 SV=1	RFC2	36.35	27.1	57	6	6	177930	179210	195540	199410	230570	208790	138560	146030	145920	166730	185590	189910	183760	178730	196270	173730	211260	190710	199270	168580	178770	298600	268610	239920
Capana01g000316	PIGU_HUMAN Phosphatidylinositol glycan anchor biosynthesis class U protein OS=Homo sapiens GN=PIGU PE=1 SV=3	PIGU	51.337	4.2	12	1	1	0	0	0	0	0	0	0	0	0	0	0	0	0	0	0	0	0	0	0	0	0	0	0	15755
Capana01g000317	FAF1_HUMAN FAS-associated factor 1 OS=Homo sapiens GN=FAF1 PE=1 SV=2	FAF1	70.541	22.8	109	7	7	237730	200790	217750	152720	202070	163380	284750	254430	260950	316870	304300	309970	253980	225520	254240	302770	288990	287210	427700	382160	396810	213940	239690	287980
Capana01g000323	ARGD_ALNGL Acetylornithine aminotransferase, mitochondrial OS=Alnus glutinosa GN=AG118 PE=2 SV=1	AG118	49.524	35.1	144	8	8	1369800	1305700	1282400	1374600	1374100	1332100	1261800	1213900	1229700	1431900	1394500	1373900	1690500	1688000	1692200	1605700	1683300	1637200	1647900	1612800	1608000	2227300	2269500	2156200
Capana01g000325	MBOA2_RAT Membrane-bound O-acyltransferase domain-containing protein 2 OS=Rattus norvegicus GN=Mboat2 PE=2 SV=2	Mboat2	51.938	17.5	91	6	6	228270	236550	224140	234280	226050	246200	206780	225260	242460	178010	181420	177410	236760	263250	233000	263990	244780	244210	176230	191290	194460	238220	230250	245330
Capana01g000335	NUP50_HUMAN Nuclear pore complex protein Nup50 OS=Homo sapiens GN=NUP50 PE=1 SV=2	NUP50	37.925	17.9	44	5	5	79898	96101	82118	83002	93016	82851	76054	83443	76443	117890	114880	127050	82586	72491	74029	81582	75025	85359	100030	95320	95165	146800	139430	151300
Capana01g000337	NDA8A_ARATH NADH dehydrogenase [ubiquinone] 1 alpha subcomplex subunit 8-A OS=Arabidopsis thaliana GN=At3g06310 PE=2 SV=1	At3g06310	11.93	40	3	2	2	0	0	0	0	0	0	0	0	0	0	0	0	0	0	0	0	0	0	0	0	0	0	0	13039
Capana01g000348	SPXM3_ARATH SPX domain-containing membrane protein At4g22990 OS=Arabidopsis thaliana GN=At4g22990 PE=2 SV=2	At4g22990	70.132	6.2	12	3	3	47378	48401	42429	35907	51329	43056	60018	51813	53839	33663	36060	43903	77411	48324	37978	61107	61669	56067	59628	54295	63610	0	0	23548
Capana01g000349	HTH_ARATH Protein HOTHEAD OS=Arabidopsis thaliana GN=HTH PE=1 SV=1	HTH	59.173	42	267	14	14	1066200	997340	965160	1077300	1083800	1050400	1123200	1095900	1114900	1099100	1102300	1055700	871700	936560	860440	955240	894590	891760	1235800	1204600	1253500	1844600	1754500	1821700
Capana01g000351	HMCS_ARATH Hydroxymethylglutaryl-CoA synthase OS=Arabidopsis thaliana GN=HMGS PE=2 SV=2	HMGS	53.662	31.2	97	10	8	366030	336000	339760	376370	343150	348710	174650	176900	185230	298020	205170	245560	332080	334380	299550	280160	323200	293150	219420	189450	202940	415970	438460	454530
Capana01g000354	RHM1_ARATH Probable rhamnose biosynthetic enzyme 1 OS=Arabidopsis thaliana GN=RHM1 PE=1 SV=1	RHM1	33.453	42.8	147	11	8	1038900	944860	956550	947660	1013300	943260	782270	834260	874260	880690	776200	808850	901380	925990	926220	911340	881040	941810	803460	774380	781470	1132300	1120700	1017200
Capana01g000355	PLDB1_ARATH Phospholipase D beta 1 OS=Arabidopsis thaliana GN=PLDBETA1 PE=2 SV=4	PLDBETA1	96.395	26.9	145	16	15	378600	326950	347540	379350	379730	369570	401890	352240	355340	238120	247310	270000	292580	299700	283710	325910	287300	294400	232060	266870	230370	268890	291570	256410
Capana01g000357	FA63A_MOUSE Protein FAM63A OS=Mus musculus GN=Fam63a PE=1 SV=1	Fam63a	71.697	25.2	80	9	9	153460	136270	122710	98970	113890	100890	148000	169290	157770	149770	122510	146010	127490	120400	121850	152930	164520	156540	189320	181630	165210	60065	104340	97473
Capana01g000364	PGL1A_ARATH PGR5-like protein 1A, chloroplastic OS=Arabidopsis thaliana GN=PGRL1A PE=1 SV=1	PGRL1A	36.168	55.2	305	15	14	3395000	3243100	3241300	3036700	2882300	2973100	4547700	4575300	4392800	3323700	3072500	3266800	3245900	3283800	3286200	3394200	3605000	3474700	3532100	3602800	3655400	2274300	2392700	2383000
Capana01g000366	GYAR_THEPD Glyoxylate reductase OS=Thermofilum pendens (strain Hrk 5) GN=gyaR PE=3 SV=1	gyaR	35.903	11.3	11	2	2	300730	290140	254210	278200	268560	266530	233910	263840	249400	0	0	244730	87352	283150	205050	313820	0	0	252530	253550	269330	0	0	0
Capana01g000375	AMO_ARATH Primary amine oxidase OS=Arabidopsis thaliana GN=At1g62810 PE=2 SV=1	At1g62810	81.993	17.9	57	7	7	149220	113710	124760	152350	179430	109630	117980	137250	118050	151790	163140	173940	214940	174250	206650	230110	222470	179190	250890	174010	208710	168800	148180	177680
Capana01g000378	Putative metallo-hydrolase/oxidoreductase superfamily protein-like (Fragment)	---	37.292	55.8	136	10	10	538620	541480	535460	569780	585280	536390	632120	631890	644370	527160	483440	502880	601770	590470	587970	526770	607120	559180	577220	559170	573680	608850	568580	523820
Capana01g000383	CAF17_DANRE Putative transferase CAF17 homolog, mitochondrial OS=Danio rerio GN=iba57 PE=3 SV=1	iba57	43.672	18.5	22	4	4	63760	69792	72562	58962	58814	62975	65343	69014	57477	67643	81967	72735	56084	50583	52358	54808	60448	59762	70662	56619	61799	58617	60391	71950
Capana01g000385	ICT1_SALSA Peptidyl-tRNA hydrolase ICT1, mitochondrial OS=Salmo salar GN=ict1 PE=2 SV=1	ict1	26.549	18.9	30	3	3	84172	45389	57459	63326	60385	53676	42032	56879	55877	60467	68977	70474	0	59357	0	52498	0	0	0	52114	0	0	0	66365
Capana01g000386	Putative ovule protein	---	39.29	4.2	7	1	1	0	0	0	0	0	0	0	0	0	0	0	0	0	0	0	0	0	0	0	0	0	0	0	25949
Capana01g000392	KEULE_ARATH SNARE-interacting protein KEULE OS=Arabidopsis thaliana GN=KEU PE=1 SV=2	KEU	70.017	17.9	58	8	8	91042	68411	85284	75124	80520	90455	83338	94599	98508	65902	60015	34779	91171	76113	64602	69696	75236	77832	75490	64640	83788	0	62440	0
Capana01g000402	keratin, type I cytoskeletal 47 kDa	---	14.351	18.5	15	1	1	0	0	0	0	0	0	43207	41617	0	0	0	42385	44128	42137	0	0	0	0	42714	44748	46365	49580	40603	44120
Capana01g000410	CLPR2_ARATH ATP-dependent Clp protease proteolytic subunit-related protein 2, chloroplastic OS=Arabidopsis thaliana GN=CLPR2 PE=1 SV=1	CLPR2	32.425	29.7	79	5	5	3212300	4576100	5018700	5754600	5690100	6007000	6275400	5608600	5968900	7133200	6283500	6880800	5403500	5429100	5328200	4826200	6016200	5546300	5735100	5593000	5619800	9955300	11662000	8820100
Capana01g000414	CLP41_ARATH Clp protease-related protein At4g12060, chloroplastic OS=Arabidopsis thaliana GN=At4g12060 PE=1 SV=1	At4g12060	25.97	42.9	113	7	7	220890	282050	417400	353480	425400	469090	578800	539140	468030	771550	737090	741600	433050	547530	581280	350250	409920	596700	486470	701510	662030	1320700	1055100	924800
Capana01g000451	1A110_ARATH Probable aminotransferase ACS10 OS=Arabidopsis thaliana GN=ACS10 PE=2 SV=1	ACS10	59.964	3.6	1	1	1	0	0	0	0	0	0	0	0	0	0	0	0	0	0	0	0	0	5884.4	0	0	0	0	0	0
Capana01g000455	PT112_ARATH Probable sugar phosphate/phosphate translocator At1g12500 OS=Arabidopsis thaliana GN=At1g12500 PE=2 SV=1	At1g12500	25.229	14.5	13	2	2	0	0	0	49763	42397	45796	0	38274	0	0	35286	32059	31821	36565	0	49074	51319	46503	0	25371	30562	0	99264	48260
Capana01g000460	CCS_MOUSE Copper chaperone for superoxide dismutase OS=Mus musculus GN=Ccs PE=1 SV=1	Ccs	32.819	35	71	8	8	136610	183600	200530	194900	230140	189020	199200	162580	187460	244250	219410	251390	254970	267260	295630	286140	295420	323090	270470	233760	264970	522580	431430	427150
Capana01g000461	SDD1_ARATH Subtilisin-like protease SDD1 OS=Arabidopsis thaliana GN=SDD1 PE=2 SV=1	SDD1	78.892	39.1	217	15	12	417660	363360	351270	378390	372160	351800	251040	257500	297930	238600	239630	225800	480340	512280	469960	455800	395840	412870	354230	346690	380240	835300	793930	838830
Capana01g000463	SDD1_ARATH Subtilisin-like protease SDD1 OS=Arabidopsis thaliana GN=SDD1 PE=2 SV=1	SDD1	74.947	34.9	170	14	12	450810	414790	422010	441640	425100	446690	280960	288020	283120	327760	329850	346240	406590	418090	418320	441810	448970	409670	386550	371150	372320	578830	717230	677210
Capana01g000466	SDD1_ARATH Subtilisin-like protease SDD1 OS=Arabidopsis thaliana GN=SDD1 PE=2 SV=1	SDD1	72.162	33.8	167	11	11	583100	558810	511690	568070	525340	533590	450620	478750	441590	531840	552150	517300	601980	660160	651950	598840	565820	526820	507160	479080	482280	765250	825800	813640
Capana01g000485	C75A6_CAMME Flavonoid 3',5'-hydroxylase OS=Campanula medium GN=CYP75A6 PE=2 SV=1	CYP75A6	30.844	19.4	24	3	3	72122	66617	60676	75660	61229	61917	64226	67747	64796	31335	34573	33030	0	0	0	0	0	0	0	0	0	0	0	0
Capana01g000487	F3PH_ARATH Flavonoid 3'-monooxygenase OS=Arabidopsis thaliana GN=CYP75B1 PE=1 SV=1	CYP75B1	46.839	7.8	14	3	3	35734	39499	42014	45854	45859	0	0	38743	66540	0	19153	0	57150	43262	41557	50393	0	40083	45478	36649	45207	29271	0	28498
Capana01g000492	F3PH_ARATH Flavonoid 3'-monooxygenase OS=Arabidopsis thaliana GN=CYP75B1 PE=1 SV=1	CYP75B1	60.466	19.9	28	6	4	894470	856140	774650	295230	634520	726090	742020	873350	731860	378280	0	0	935400	1559800	1583600	1203900	791190	1202900	727440	711380	659550	0	729810	501730
Capana01g000496	F10AL_ARATH FAM10 family protein At4g22670 OS=Arabidopsis thaliana GN=At4g22670 PE=1 SV=1	At4g22670	44.515	34.5	205	14	14	777660	875240	911910	924450	930920	965210	1291800	1285900	1286600	516650	487130	489920	1238800	1195400	1168800	1148100	1277800	1291900	1837500	1823200	1897900	474310	467330	452190
Capana01g000497	VAS_ARATH Lipid transfer-like protein VAS OS=Arabidopsis thaliana GN=VAS PE=2 SV=1	VAS	15.638	7.9	13	1	1	0	0	0	0	0	0	0	0	0	0	0	0	0	0	0	0	0	0	0	0	0	0	0	99990
Capana01g000498	Putative spindle assembly checkpoint component MAD1-like	---	28.595	38.3	206	8	8	1684900	1530200	1489200	1972600	1949200	1873200	1296200	1324800	1244000	3729200	3771400	3833700	1396200	1441400	1484800	1575000	1498100	1445300	2118300	2107900	2140100	1843500	1809500	1733800
Capana01g000500	14KD_DAUCA 14 kDa proline-rich protein DC2.15 OS=Daucus carota PE=2 SV=1	---	14.341	14.6	21	1	1	0	0	0	0	0	0	0	0	0	0	0	0	0	0	0	0	0	0	0	0	0	0	0	7906.2
Capana01g000505	EFGC_SOYBN Elongation factor G, chloroplastic OS=Glycine max GN=FUSA PE=3 SV=1	FUSA	86.786	61.4	816	35	34	11688000	11793000	11654000	9753300	9774100	9897500	13606000	13652000	13467000	12121000	12070000	12085000	10534000	10422000	10405000	11080000	11050000	11288000	12631000	13025000	12845000	5667300	5514600	5695600
Capana01g000509	STIP_SOYBN Heat shock protein STI OS=Glycine max GN=STI PE=2 SV=1	STI	65.229	57.4	628	27	27	4915400	4895400	4911600	4880700	4816400	4737300	4310900	4388200	4456500	5518500	5524800	5626300	4336600	4431000	4505100	4426400	4335600	4286200	5377500	5142200	5139400	5214900	5155700	5267600
Capana01g000516	TL225_ARATH Thylakoid lumenal protein At1g12250, chloroplastic OS=Arabidopsis thaliana GN=At1g12250 PE=1 SV=1	At1g12250	28.078	54.7	195	10	10	627570	681500	620980	662260	657020	647700	790340	751680	795030	870240	857670	848280	1756200	1690000	1713200	1580500	1662000	1606400	1760100	1744200	1786800	3081600	3019400	3036200
Capana01g000521	SKU5_ARATH Monocopper oxidase-like protein SKU5 OS=Arabidopsis thaliana GN=SKU5 PE=1 SV=1	SKU5	56.856	21.5	80	8	8	751430	807940	798860	742610	786980	759660	725490	763520	776550	362450	314410	357610	874110	843000	820490	726720	653350	663130	554460	637580	608210	196650	203400	122970
Capana01g000523	TAL_HAES2 Transaldolase OS=Haemophilus somnus (strain 2336) GN=tal PE=3 SV=1	tal	41.576	32.6	160	9	9	1301600	1369400	1382600	1492600	1434700	1417000	1302500	1277300	1299200	1339000	1368200	1320100	1674300	1640900	1642500	1354800	1453100	1483600	1244900	1276000	1241300	2158900	2112300	2115000
Capana01g000530	XYL1_ARATH Alpha-xylosidase OS=Arabidopsis thaliana GN=XYL1 PE=1 SV=1	XYL1	103.68	33.7	334	22	19	1268400	1151000	1133000	1115400	1172900	1073100	800100	833670	823730	843060	829520	802680	1365000	1294200	1351700	1127600	1084600	1033500	886100	904810	920710	1553800	1499100	1547400
Capana01g000535	APT1_ARATH Adenine phosphoribosyltransferase 1, chloroplastic OS=Arabidopsis thaliana GN=APT1 PE=1 SV=2	APT1	20.098	25.8	33	4	2	36869	34363	36468	31674	0	32567	23803	28255	0	25002	26883	29359	61149	55690	51611	60878	45071	47581	58175	54488	57909	70992	76083	0
Capana01g000550	14KD_DAUCA 14 kDa proline-rich protein DC2.15 OS=Daucus carota PE=2 SV=1	---	14.46	27.3	59	3	3	413730	388470	435270	554350	512780	514600	733910	740220	644860	553450	554820	584980	613280	687020	694510	780680	781160	843920	841210	807480	840790	1189800	1006400	1131300
Capana01g000551	NDUB8_ARATH NADH dehydrogenase [ubiquinone] 1 beta subcomplex subunit 8, mitochondrial OS=Arabidopsis thaliana GN=At5g47570 PE=2 SV=1	At5g47570	11.425	26.9	11	1	1	0	0	12867	0	27352	0	36902	29870	23430	26334	0	0	0	0	0	31876	24592	0	36947	0	25005	0	0	0
Capana01g000552	LDHB_HORVU L-lactate dehydrogenase B (Fragment) OS=Hordeum vulgare PE=1 SV=1	---	37.753	22.6	27	5	5	86836	71646	75494	72618	41209	75960	53678	0	0	0	74106	0	66479	61707	0	110890	48274	88142	353510	0	0	0	136210	91898
Capana01g000557	PR1B4_ARATH PRA1 family protein B4 OS=Arabidopsis thaliana GN=PRA1B4 PE=1 SV=1	PRA1B4	23.413	6.8	11	1	1	0	0	0	0	0	0	0	0	0	0	0	0	0	0	0	0	0	0	0	0	0	0	0	8013.6
Capana01g000571	HS147_ARATH 14.7 kDa heat shock protein OS=Arabidopsis thaliana GN=HSP14.7 PE=2 SV=1	HSP14.7	18.431	22.9	42	4	4	40879	70370	80200	62050	67382	73020	69014	65861	70664	102790	94019	101840	86102	80651	83340	74701	93245	85161	76292	98927	99243	145360	150340	147110
Capana01g000574	HS23C_CHERU Small heat shock protein, chloroplastic OS=Chenopodium rubrum GN=HSP23 PE=2 SV=1	HSP23	24.162	9.5	9	1	1	0	0	0	0	0	0	0	0	0	0	0	0	0	0	0	0	0	0	0	0	0	0	0	33999
Capana01g000575	HS23C_CHERU Small heat shock protein, chloroplastic OS=Chenopodium rubrum GN=HSP23 PE=2 SV=1	HSP23	24.453	23.3	14	3	3	0	0	0	0	0	0	0	0	0	33592	0	28731	0	0	0	0	0	0	23704	26965	32144	64167	88375	98820
Capana01g000579	DNJ13_ARATH Chaperone protein dnaJ 13 OS=Arabidopsis thaliana GN=ATJ13 PE=1 SV=2	ATJ13	59.639	10.9	11	4	4	66816	0	23188	35739	0	0	25341	0	59366	0	0	30283	0	0	24675	0	0	22569	0	0	0	0	0	0
Capana01g000586	RBSK_BACSU Ribokinase OS=Bacillus subtilis GN=rbsK PE=3 SV=2	rbsK	40.799	22.3	72	5	5	405420	352940	368050	308710	345050	351080	376920	377870	354000	323320	375450	365750	231180	196480	186220	217270	227090	196790	192000	226170	188190	245670	260690	226920
Capana01g000588	ACOX1_ARATH Peroxisomal acyl-coenzyme A oxidase 1 OS=Arabidopsis thaliana GN=ACX1 PE=1 SV=1	ACX1	74.449	44	268	22	22	945290	889120	800300	902680	804040	780310	730360	718300	757400	691670	702600	743970	834650	813770	791600	876400	848520	794020	761780	746480	736630	486330	490880	550170
Capana01g000606	PURU_BACSU Formyltetrahydrofolate deformylase OS=Bacillus subtilis GN=purU PE=3 SV=2	purU	35.375	4.5	12	1	1	0	0	0	0	0	0	0	0	0	0	0	0	0	0	0	0	0	0	0	0	0	0	0	11716
Capana01g000610	GEML5_ARATH GEM-like protein 5 OS=Arabidopsis thaliana GN=At5g13200 PE=1 SV=1	At5g13200	27.35	40.7	60	8	6	457460	352720	378640	400790	343830	370550	389920	359930	375560	757780	621930	600230	310260	361010	355750	305570	276450	286580	231830	251490	274890	569840	534750	742720
Capana01g000612	Putative mucin-19-like	---	230.57	14.7	127	19	19	249920	206620	205520	196680	196240	176930	110100	116860	141910	158050	157570	181200	172700	217240	194490	232310	232580	209070	222000	201540	205590	177330	174500	187880
Capana01g000625	CCHC-type domain-containing protein	---	54.217	8.3	22	2	2	48107	0	32186	0	0	33928	39639	0	0	0	0	0	0	0	0	50784	0	25217	59098	28220	0	0	0	0
Capana01g000629	PE191_ARATH Peroxisome biogenesis protein 19-1 OS=Arabidopsis thaliana GN=PEX19-1 PE=1 SV=1	PEX19-1	28.101	20.2	38	4	4	79202	42190	48810	44777	44769	42285	46826	39713	44962	42743	43144	50453	0	46619	31668	35824	46592	48956	73114	37837	40187	59547	49725	53642
Capana01g000643	DCL_SOLLC Protein DCL, chloroplastic OS=Solanum lycopersicum GN=DCL PE=2 SV=1	DCL	25.348	21.3	33	4	4	41945	51319	34898	49868	47319	50873	36520	31837	28016	70550	75115	69037	44328	41190	48142	41247	41900	48197	58853	68061	61789	67122	71740	70772
Capana01g000647	CB24_PEA Chlorophyll a-b binding protein P4, chloroplastic OS=Pisum sativum GN=lhcA-P4 PE=1 SV=1	lhcA-P4	27.676	37.1	31	5	4	0	937570	0	1039000	0	885970	729940	910690	0	0	1161900	1194600	0	0	0	0	1083400	0	1052300	902720	0	951930	0	0
Capana01g000655	HOS1_ARATH E3 ubiquitin-protein ligase HOS1 OS=Arabidopsis thaliana GN=HOS1 PE=1 SV=1	HOS1	106.12	5.5	7	3	3	0	0	0	18634	0	0	0	22689	25227	20458	20244	20995	14570	0	16507	0	0	24022	0	25291	26008	0	0	0
Capana01g000656	UREA_CANEN Urease OS=Canavalia ensiformis PE=1 SV=3	---	97.714	2.1	2	1	1	0	0	0	0	0	0	0	0	0	0	0	0	0	0	0	0	0	0	0	0	4424.2	0	0	0
Capana01g000664	PMA1_SOLLC Plasma membrane ATPase 1 OS=Solanum lycopersicum GN=LHA1 PE=2 SV=1	LHA1	105.77	7.4	2	6	1	0	0	0	0	0	0	0	0	0	0	0	0	0	0	0	0	0	0	0	0	0	0	0	14754
Capana01g000672	mediator of RNA polymerase II transcription subunit 32	---	15.366	24.8	3	2	2	0	0	0	0	0	0	0	0	0	0	0	0	0	0	0	0	0	0	0	0	0	16671	0	0
Capana01g000673	PPT1_CAEEL Palmitoyl-protein thioesterase 1 OS=Caenorhabditis elegans GN=ppt-1 PE=2 SV=2	ppt-1	39.379	27.2	88	5	5	305890	302600	301360	301910	312800	329440	274740	315430	298990	189860	214680	226000	297670	284730	270140	236930	275480	226150	247860	263250	220770	342180	299490	282140
Capana01g000681	AUHM_DICDI Methylglutaconyl-CoA hydratase, mitochondrial OS=Dictyostelium discoideum GN=auh PE=3 SV=1	auh	32.792	22.9	78	4	4	144420	164240	163600	158090	161560	143860	148080	158310	154060	142090	143620	171690	182420	178900	174130	190620	173380	189560	196780	170930	167820	137780	150060	138370
Capana01g000687	HABP4_PAI-RBP1 domain-containing protein	---	41.926	38.2	174	13	11	1785500	1661500	1640100	1552700	1500000	1476600	1045300	1149500	1161700	2138700	2085700	2047400	1473000	1525700	1459300	1649400	1460400	1399800	1609100	1653200	1590600	1402300	1517000	1404000
Capana01g000689	YPTM2_MAIZE GTP-binding protein YPTM2 OS=Zea mays GN=YPTM2 PE=2 SV=1	YPTM2	23.627	60.4	143	8	2	616850	602630	605200	708020	633720	661910	488730	472490	491450	477310	508050	514990	642660	617950	604970	542160	546810	546270	395520	442200	389920	748620	825720	855370
Capana01g000691	3HBH1_PSEAC 3-hydroxybenzoate 6-hydroxylase 1 OS=Pseudomonas alcaligenes GN=xlnD PE=1 SV=1	xlnD	44.9	10	19	3	3	77888	74986	71962	73462	72542	61797	74100	79450	59321	67806	0	62055	98985	61238	67432	65263	81332	0	99497	0	43288	0	0	57986
Capana01g000692	HCT_ARATH Hydroxycinnamoyl-Coenzyme A shikimate/quinate hydroxycinnamoyltransferase OS=Arabidopsis thaliana GN=HCT PE=2 SV=1	HCT	40.734	5.3	0	1	1	0	0	0	0	0	0	0	0	0	0	0	0	0	0	0	0	0	0	0	0	0	0	0	0
Capana01g000694	RK19_SPIOL 50S ribosomal protein L19, chloroplastic OS=Spinacia oleracea GN=RPL19 PE=1 SV=2	RPL19	24.707	16.3	71	3	3	1079200	1049400	1313100	1285900	1316000	1379300	1294700	1420100	1355900	1257200	1445600	1406500	1498800	1532000	1794600	1528300	1570700	1551000	1221800	1303200	1481200	1400800	1471200	1358500
Capana01g000695	VAP21_ARATH Vesicle-associated protein 2-1 OS=Arabidopsis thaliana GN=PVA21 PE=2 SV=1	PVA21	15.046	44.8	22	3	2	46492	26247	41232	36091	28705	0	0	18807	31610	18232	0	0	0	37931	22971	45945	35696	0	25983	23468	33565	27926	0	0
Capana01g000697	BI1_ARATH Bax inhibitor 1 OS=Arabidopsis thaliana GN=BI-1 PE=1 SV=1	BI-1	27.565	10.1	6	2	2	0	0	0	0	0	0	0	0	0	0	27260	28750	0	0	0	0	0	0	0	0	0	66660	40535	0
Capana01g000699	CCA2_SCHPO Putative CCA tRNA nucleotidyltransferase 2 OS=Schizosaccharomyces pombe (strain 972 / ATCC 24843) GN=SPCC645.10 PE=2 SV=1	SPCC645.10	67.975	8.6	22	4	4	57637	50522	45754	55574	51459	52102	44535	44219	42610	36757	32277	34050	52903	54411	51072	51475	51913	47847	51136	50373	51623	33548	34917	39832
Capana01g000717	CLPR4_ARATH ATP-dependent Clp protease proteolytic subunit-related protein 4, chloroplastic OS=Arabidopsis thaliana GN=CLPR4 PE=1 SV=1	CLPR4	38.216	36.6	109	8	7	1175100	1170800	1189800	1298500	1282200	1332900	1357300	1440200	1338100	1737500	1678800	1744700	1425800	1442200	1439100	1350500	1493700	1452500	1362300	1489000	1433800	2591500	2506800	2268200
Capana01g000721	Putative lil3 family protein-like	---	29.239	47.2	121	11	11	1024700	1084200	1070500	1129300	1238800	1174200	988550	1000400	1070400	1069900	1031400	1090500	1161700	1243300	1186100	1058500	1158200	1091100	1019800	1038400	1039500	1659700	1571500	1768600
Capana01g000725	(S)-ureidoglycine aminohydrolase	---	34.26	29.3	50	5	5	198660	182490	149940	207850	251360	223630	268330	175810	211790	239670	211940	248870	142670	165070	200870	161970	176750	168970	169400	203740	183160	308820	315090	348750
Capana01g000726	DOHH_ARATH Deoxyhypusine hydroxylase OS=Arabidopsis thaliana GN=At3g58180 PE=2 SV=1	At3g58180	36.742	8.6	7	2	2	0	0	0	0	0	0	19840	0	0	0	0	0	0	0	0	0	0	0	45335	0	0	0	0	0
Capana01g000731	AAI domain-containing protein	---	12.154	16.4	2	1	1	0	0	0	0	0	0	0	0	0	0	0	0	0	0	0	0	0	0	0	0	0	0	0	36115
Capana01g000732	SAPK3_ORYSJ Serine/threonine-protein kinase SAPK3 OS=Oryza sativa subsp. japonica GN=SAPK3 PE=1 SV=1	SAPK3	33.511	10.2	2	2	2	0	0	0	0	0	0	0	0	0	0	0	0	0	0	0	0	0	0	111810	0	0	0	0	0
Capana01g000756	P1254_THEMA Phosphorylated carbohydrates phosphatase TM_1254 OS=Thermotoga maritima GN=TM_1254 PE=1 SV=1	TM_1254	26.369	26.1	26	5	5	109480	68334	101410	101820	41586	110230	110760	118180	130060	118210	101180	122200	114160	104470	115060	92622	73570	95244	91085	105710	113790	155060	173840	187830
Capana01g000766	PLA1_PLAAC Putative invertase inhibitor OS=Platanus acerifolia PE=1 SV=1	---	13.362	34.4	72	3	3	111500	123240	120320	118040	119360	127150	124400	126780	125050	133050	127290	131810	141830	141560	144140	137480	146080	139690	137160	134650	138770	179810	173580	170660
Capana01g000773	RENT1_ARATH Regulator of nonsense transcripts 1 homolog OS=Arabidopsis thaliana GN=UPF1 PE=1 SV=2	UPF1	146.96	18	112	14	5	265190	261860	238300	237550	228750	206440	193380	198350	202600	171370	168930	171810	198290	190990	181710	223280	219000	211000	217490	205110	204900	99095	106690	110860
Capana01g000775	LONP2_SPIOL Lon protease homolog 2, peroxisomal OS=Spinacia oleracea PE=2 SV=2	---	98.365	21.9	107	13	13	153880	187970	174250	161450	156810	156960	184620	165200	179580	116260	113470	100650	146000	146030	146780	161020	155030	146370	164050	179550	189050	34611	49396	56124
Capana01g000781	YAM3_SCHPO Putative oxidoreductase C1F5.03c OS=Schizosaccharomyces pombe (strain 972 / ATCC 24843) GN=SPAC1F5.03c PE=2 SV=1	SPAC1F5.03c	40.106	13.3	12	3	3	12458	9949.6	0	13282	0	12415	0	0	0	0	0	11756	0	0	13969	14769	0	14302	12037	0	10119	0	15577	0
Capana01g000790	VP13C_HUMAN Vacuolar protein sorting-associated protein 13C OS=Homo sapiens GN=VPS13C PE=1 SV=1	VPS13C	180.91	2.7	9	4	4	0	292850	284940	0	0	316440	0	326330	0	0	0	0	0	0	0	0	266580	0	0	239760	0	0	0	0
Capana01g000791	ENDUA_XENLA Poly(U)-specific endoribonuclease-A OS=Xenopus laevis GN=endou-a PE=1 SV=1	endou-a	46.989	58.2	174	15	15	540370	496530	451860	422790	393840	400290	388070	398690	384990	293260	277250	264350	468160	425860	449490	442830	453490	392170	347260	368060	377110	220270	169090	175950
Capana01g000792	CENPO_CHICK Centromere protein O OS=Gallus gallus GN=CENPO PE=1 SV=2	CENPO	33.01	12.3	10	2	2	0	0	0	0	0	0	0	0	0	0	0	0	0	0	0	0	9591.9	0	0	0	0	0	0	0
Capana01g000795	Y5707_ARATH Probable receptor-like protein kinase At5g47070 OS=Arabidopsis thaliana GN=At5g47070 PE=1 SV=1	At5g47070	48.814	7.4	10	3	3	41585	35464	0	0	41241	41970	36466	37788	0	0	36809	35962	0	0	30159	0	0	28055	0	0	0	0	0	0
Capana01g000802	Putative allyl alcohol dehydrogenase-like	---	11.596	75	52	4	4	425190	418270	409560	418260	424030	416280	424850	429830	429450	488770	497670	490110	454810	439320	456830	476350	471590	482760	485180	458180	385020	787370	770720	797380
Capana01g000803	AGM1_ARATH Phosphoacetylglucosamine mutase OS=Arabidopsis thaliana GN=DRT101 PE=1 SV=1	DRT101	60.189	12.7	42	4	4	65187	72129	63371	63077	72413	56262	0	58737	69040	65109	52678	50475	90247	76108	89627	87191	85370	78055	84371	86507	67206	76402	71654	91375
Capana01g000808	PMTE_ARATH Probable methyltransferase PMT14 OS=Arabidopsis thaliana GN=At4g18030 PE=1 SV=1	At4g18030	69.927	39.7	215	16	15	509330	576390	604490	521560	534940	546200	402380	413810	420200	416460	412830	424980	451720	421290	458590	406460	419920	427570	374570	367850	363900	353150	348020	351420
Capana01g000812	tobamovirus multiplication protein 2A	---	35.572	15.6	65	4	4	388170	319320	328730	364820	388460	341900	269360	217070	262380	323740	300310	324450	378890	390400	336620	458560	405110	393700	301090	276500	271700	401180	397970	410270
Capana01g000816	KPRS1_ARATH Ribose-phosphate pyrophosphokinase 1, chloroplastic OS=Arabidopsis thaliana GN=PRS1 PE=2 SV=2	PRS1	39.921	19.5	10	5	1	0	0	0	0	0	0	0	0	0	0	0	0	0	0	0	0	0	0	0	0	0	0	0	32054
Capana01g000823	KPYG_TOBAC Pyruvate kinase isozyme G, chloroplastic OS=Nicotiana tabacum PE=2 SV=1	---	65.808	28.6	83	10	8	372390	343660	337740	364260	361480	351390	417090	372980	406960	389930	354650	395970	268760	297090	263490	268770	272250	267030	323500	307610	287360	246730	209240	194000
Capana01g000835	NDUA6_ARATH NADH dehydrogenase [ubiquinone] 1 alpha subcomplex subunit 6 OS=Arabidopsis thaliana GN=At3g12260 PE=2 SV=1	At3g12260	15.098	63.9	121	7	6	738020	692140	626790	719930	688210	662480	705820	732200	735800	822470	821170	824320	462460	454900	476140	673740	632670	587930	697660	694870	684610	752310	774450	806010
Capana01g000839	PDI13_ARATH Protein disulfide isomerase-like 1-3 OS=Arabidopsis thaliana GN=PDIL1-3 PE=2 SV=1	PDIL1-3	63.405	34.2	189	15	15	547810	555310	525320	498720	479650	510460	629420	616420	605070	359510	348170	365500	679420	663480	662320	751420	727710	696660	978630	1029300	1040700	312070	322300	347860
Capana01g000841	F108B_CHICK Abhydrolase domain-containing protein FAM108B1 OS=Gallus gallus GN=FAM108B1 PE=2 SV=1	FAM108B1	38.675	3.2	26	2	2	79146	102400	109150	100970	0	115940	0	60972	0	0	80822	108630	74571	0	69844	52390	50407	59430	0	0	66800	0	0	0
Capana01g000845	UV-B-induced protein At3g17800, chloroplastic	---	45.024	41.4	214	10	10	672150	658160	662980	675680	664270	659280	676610	640380	692420	526910	549000	561570	503090	500950	502810	526240	523110	485180	475570	434920	475520	310670	368600	352670
Capana01g000850	U195A_ARATH MIP18 family protein At1g68310 OS=Arabidopsis thaliana GN=At1g68310 PE=2 SV=2	At1g68310	18.247	8.6	21	1	1	0	0	0	0	0	0	0	0	0	0	0	0	0	0	0	0	0	0	0	0	0	0	0	8093.8
Capana01g000851	VPS25_ARATH Vacuolar protein sorting-associated protein 25 OS=Arabidopsis thaliana GN=VPS25 PE=1 SV=1	VPS25	18.397	23.3	12	3	3	51637	0	43964	48633	0	54273	0	0	0	48659	48408	50565	52917	0	54282	50532	46775	40993	0	0	0	63768	62144	76189
Capana01g000853	ERG8_YEAST Phosphomevalonate kinase OS=Saccharomyces cerevisiae (strain ATCC 204508 / S288c) GN=ERG8 PE=1 SV=2	ERG8	56.09	16.6	25	4	3	43555	41214	0	60290	49483	60127	57988	52743	68971	0	47238	0	38588	49423	45912	51514	36790	29195	0	25223	32505	39118	80184	66469
Capana01g000858	Putative pesticidal crystal cry13Aa-like	---	16.008	13.5	4	1	1	0	0	0	0	0	0	0	0	0	0	0	0	0	0	0	0	0	0	0	0	0	0	0	5581.8
Capana01g000865	DUF1995 domain-containing protein	---	38.419	20.7	122	6	6	382050	413110	364580	401650	362810	374700	378980	440090	396800	290090	374180	364740	413450	410060	413930	413140	415190	361110	305220	376900	329790	451790	328290	356050
Capana01g000872	IFRH_LUPAL Isoflavone reductase homolog OS=Lupinus albus PE=2 SV=1	---	35.096	8.6	8	2	2	0	7150	0	0	0	0	0	0	0	0	0	0	78821	96260	29518	31866	0	0	0	0	22628	0	0	0
Capana01g000874	CBWD2_HUMAN COBW domain-containing protein 2 OS=Homo sapiens GN=CBWD2 PE=1 SV=1	CBWD2	47.127	23.8	38	7	7	72119	86026	87787	73882	75068	71132	68240	73063	70262	83335	79053	63207	77767	73616	72279	91404	97122	96782	115550	96433	107900	66532	68596	71580
Capana01g000876	TPR2_ARATH Topless-related protein 2 OS=Arabidopsis thaliana GN=TPR2 PE=1 SV=2	TPR2	68.56	4.8	7	2	1	0	0	0	0	0	0	0	0	0	0	0	0	0	0	0	0	0	0	0	0	0	0	0	8731.1
Capana01g000888	YOHK_SHIFL Inner membrane protein yohK OS=Shigella flexneri GN=yohK PE=3 SV=1	yohK	54.582	19	109	6	6	629210	639610	639920	763820	754790	762300	861930	839430	826410	628320	633550	626990	775880	793800	782960	893150	897320	868170	609860	681950	668870	1321800	1268500	1264200
Capana01g000893	KPPR_WHEAT Phosphoribulokinase, chloroplastic OS=Triticum aestivum PE=2 SV=1	---	45.433	73.1	782	23	23	27677000	28621000	28841000	27600000	27331000	28126000	34450000	35291000	35625000	36882000	36780000	35434000	31322000	30235000	31207000	29638000	31502000	31832000	30291000	31785000	32511000	43360000	41777000	41427000
Capana01g000894	SCAM4_ARATH Secretory carrier-associated membrane protein 4 OS=Arabidopsis thaliana GN=SCAMP4 PE=2 SV=1	SCAMP4	35.465	20.9	48	4	4	215200	204900	181880	215790	225440	218770	178610	181690	187550	210340	195500	201110	184430	197430	186260	231810	213180	220260	168850	186300	172110	266090	265890	267890
Capana01g000916	MOB1_ARATH MOB kinase activator-like 1 OS=Arabidopsis thaliana GN=At4g19045 PE=2 SV=1	At4g19045	26.318	11.3	39	2	2	54866	52390	46271	54616	49201	54543	40216	46255	0	39243	35282	0	53783	52935	52218	51333	46927	46083	37136	38792	33662	39201	39324	41696
Capana01g000931	THYN1_MOUSE Thymocyte nuclear protein 1 OS=Mus musculus GN=Thyn1 PE=1 SV=1	Thyn1	16.718	22	13	2	2	0	0	0	0	0	0	0	0	0	18681	20449	29442	0	0	0	12654	15405	0	0	0	0	22111	0	0
Capana01g000933	PMTL_ARATH Probable methyltransferase PMT21 OS=Arabidopsis thaliana GN=ERD3 PE=2 SV=1	ERD3	68.174	12.1	8	4	1	0	0	0	0	0	0	0	0	0	0	0	0	0	0	0	0	0	0	0	0	0	0	0	15678
Capana01g000948	CCD4_ARATH Probable carotenoid cleavage dioxygenase 4, chloroplastic OS=Arabidopsis thaliana GN=CCD4 PE=1 SV=1	CCD4	66.052	23.2	121	10	10	254320	249890	237370	153790	151090	156160	238750	243030	237560	142370	142630	137270	250620	237610	260160	221450	213890	206830	220240	201500	212660	96543	124910	125410
Capana01g000961	AB2E_ARATH ABC transporter E family member 2 OS=Arabidopsis thaliana GN=ABCE2 PE=2 SV=1	ABCE2	65.817	31.5	134	11	11	1052000	1119600	1066600	870120	904810	870380	927270	926300	897540	851070	870500	862430	874090	853410	845340	871360	845170	897340	880530	961500	884980	543290	567270	604580
Capana01g000962	VPS53_MOUSE Vacuolar protein sorting-associated protein 53 homolog OS=Mus musculus GN=Vps53 PE=2 SV=1	Vps53	21.556	15.2	5	2	1	0	0	0	0	0	0	0	0	0	0	0	0	0	0	0	0	0	0	0	0	12500	0	0	0
Capana01g000964	VPS53_CHICK Vacuolar protein sorting-associated protein 53 homolog OS=Gallus gallus GN=VPS53 PE=2 SV=1	VPS53	53.163	10.1	20	3	3	25772	22255	19931	20973	24047	14764	18853	18603	17360	17580	15875	15403	20041	25073	0	19500	16677	19142	19235	0	23698	0	0	0
Capana01g000965	arabinosyltransferase XEG113	---	72.14	10.4	20	4	4	56127	45539	65940	60303	60292	62975	0	38445	35808	27811	22745	0	46054	59106	48900	0	0	45861	37232	0	31724	0	25845	0
Capana01g000968	COG6_BOVIN Conserved oligomeric Golgi complex subunit 6 OS=Bos taurus GN=COG6 PE=2 SV=1	COG6	53.569	17.9	28	5	5	124950	111330	115810	99409	113310	90490	85693	89486	111540	76678	69059	90069	76520	88358	87535	100410	131320	111760	94325	90404	86006	0	0	72436
Capana01g000969	COG6_DICDI Conserved oligomeric Golgi complex subunit 6 OS=Dictyostelium discoideum GN=cog6 PE=3 SV=1	cog6	30.607	15.5	20	2	2	44775	145010	0	0	0	0	0	0	0	0	28288	0	0	55203	31753	0	40936	27837	0	39145	0	0	0	0
Capana01g000975	NUDT3_ARATH Nudix hydrolase 3 OS=Arabidopsis thaliana GN=NUDT3 PE=1 SV=1	NUDT3	81.537	35	132	17	17	410780	369510	348500	351940	360230	354430	461670	468330	461300	403370	460280	454300	332720	335200	307430	361220	356910	384400	369970	411170	395360	179050	208750	227660
Capana01g000983	AP4E_ARATH AP-4 complex subunit epsilon OS=Arabidopsis thaliana GN=At1g31730 PE=1 SV=1	At1g31730	105.82	30.9	195	19	19	567620	543470	478430	434520	438620	461000	388520	449980	454010	388940	384100	404590	409740	446920	450990	533900	475730	490230	445490	451630	446190	206660	199600	238480
Capana01g000988	PUR9_LISMF Bifunctional purine biosynthesis protein PurH OS=Listeria monocytogenes serotype 4b (strain F2365) GN=purH PE=3 SV=1	purH	65.967	49.1	322	18	18	912430	837250	895720	886510	868780	903800	976530	988040	990850	989950	977370	1003300	831470	794390	779600	805640	822310	852770	868210	857010	898530	795870	833690	786960
Capana01g001001	RL132_BRANA 60S ribosomal protein L13-2 OS=Brassica napus PE=2 SV=1	---	23.652	45.6	133	10	10	1861800	1799600	1821000	1730100	1642100	1674000	1419300	1425900	1435900	1166400	1191000	1185100	1548600	1591600	1553900	1758700	1767700	1677700	1548800	1539800	1607100	616700	614660	669650
Capana01g001008	FH3_ORYSJ Formin-like protein 3 OS=Oryza sativa subsp. japonica GN=FH3 PE=2 SV=2	FH3	24.698	9.1	4	1	1	0	0	0	0	0	0	0	0	0	0	0	0	0	0	0	0	0	0	0	0	4222.9	0	0	0
Capana01g001014	AOX1_TOBAC Alternative oxidase 1, mitochondrial OS=Nicotiana tabacum GN=AOX1 PE=1 SV=1	AOX1	40.125	42.6	97	11	9	726980	656380	618450	610580	598250	558320	551360	553290	497960	890300	816800	801350	629100	607760	677040	605740	528240	472940	432190	377770	280480	1282000	1291400	1293000
Capana01g001015	AGL2_BACTQ Alpha-glucosidase 2 OS=Bacillus thermoamyloliquefaciens PE=3 SV=1	---	113.17	12	39	8	8	113510	96547	128660	110420	108550	106920	103530	121080	125190	86611	99200	95405	99867	101140	103840	145880	122770	107480	129250	126090	105020	121430	65391	51610
Capana01g001028	Lon N-terminal domain-containing protein	---	33.758	20.3	30	4	4	0	69126	72477	22811	53174	60734	72490	66714	46913	83469	66106	71979	63972	78134	68789	57537	62976	73007	41973	32679	69856	74993	85490	52834
Capana01g001030	AAE1_ARATH Probable acyl-activating enzyme 1, peroxisomal OS=Arabidopsis thaliana GN=AAE1 PE=2 SV=1	AAE1	61.262	9.4	35	4	4	119400	112510	118820	117880	116200	119860	88844	99573	92418	98435	93307	90246	125820	130520	141300	119420	127870	115240	99797	100960	104010	77866	73402	68842
Capana01g001031	Vacuolar protein sorting-associated protein	---	57.524	23.2	103	8	7	247730	246180	237860	244020	245160	216140	222820	236790	240230	195120	218620	204130	315760	310990	307800	323070	303640	314690	235900	241610	221750	451410	488190	467150
Capana01g001041	CLPP4_ARATH ATP-dependent Clp protease proteolytic subunit 4, chloroplastic OS=Arabidopsis thaliana GN=CLPP4 PE=1 SV=1	CLPP4	32.289	37.4	274	8	8	1367400	1293400	1587800	1673300	1682000	1703000	1846100	1798100	1611200	2094700	2333000	1932800	1670500	1788600	1784800	1656700	1771100	1799400	1663600	1563500	1613000	2491100	2339900	2411500
Capana01g001047	PYR1_ARATH Abscisic acid receptor PYR1 OS=Arabidopsis thaliana GN=PYR1 PE=1 SV=1	PYR1	23.814	24.3	23	4	4	172890	168980	147310	152510	112120	182210	159620	133580	141390	0	167410	155660	144230	135640	136020	148270	130050	129610	155210	139240	143870	151760	151200	133320
Capana01g001049	ARGE_DICDI Acetylornithine deacetylase OS=Dictyostelium discoideum GN=argE PE=1 SV=2	argE	48.035	40.9	146	10	10	728920	727530	680600	710840	697990	695980	670670	677440	661000	561800	561210	556330	694190	694030	694240	714750	719050	701120	646150	634710	624060	732970	708540	677210
Capana01g001054	ESCA_ARATH Putative DNA-binding protein ESCAROLA OS=Arabidopsis thaliana GN=ESC PE=2 SV=1	ESC	28.307	23.6	28	4	4	48975	50144	57307	40124	45005	42490	30718	30459	36641	41975	51728	51286	46254	46272	40341	35748	39033	44556	31698	0	0	79156	96060	92373
Capana01g001057	TPS5_ARATH Alpha,alpha-trehalose-phosphate synthase [UDP-forming] 5 OS=Arabidopsis thaliana GN=TPS5 PE=1 SV=2	TPS5	97.204	10.8	14	6	1	0	0	0	0	0	0	0	0	0	0	0	0	0	0	0	0	0	10799	14562	0	18309	0	0	0
Capana01g001066	AB2B_ARATH ABC transporter B family member 2 OS=Arabidopsis thaliana GN=ABCB2 PE=1 SV=3	ABCB2	137.32	13.3	83	9	9	88273	71524	92947	60779	66554	79024	83000	89575	81886	39636	48754	33909	128300	127890	116840	159220	160150	141750	172470	153920	133820	43850	22345	0
Capana01g001079	ROC3_NICSY 28 kDa ribonucleoprotein, chloroplastic OS=Nicotiana sylvestris PE=1 SV=1	---	31.672	53.9	203	12	12	1110800	1205200	1267500	1334400	1383500	1447600	1566700	1579400	1546900	1679600	1628800	1653000	1402600	1364100	1358100	1079400	1190000	1266500	1345800	1333100	1363400	1662700	1559200	1547100
Capana01g001085	Succinate dehydrogenase [ubiquinone] iron-sulfur subunit, mitochondrial	---	13.634	51.9	54	6	6	70044	71945	84835	58094	66442	65105	87257	95062	96739	84706	84064	82229	110420	90186	67525	104630	88858	97835	117440	110140	127580	178860	154380	183860
Capana01g001093	AGD8_ARATH Probable ADP-ribosylation factor GTPase-activating protein AGD8 OS=Arabidopsis thaliana GN=AGD8 PE=1 SV=1	AGD8	38.998	19	87	5	4	148420	143200	138320	159170	149360	150280	109270	81192	85629	206340	177920	182590	182160	177180	168640	153350	142730	145470	143620	121230	134530	181120	180340	169740
Capana01g001103	GTOMC_ORYSJ Probable tocopherol O-methyltransferase, chloroplastic OS=Oryza sativa subsp. japonica GN=VTE4 PE=2 SV=1	VTE4	37.02	34	103	8	8	289020	253660	299990	323650	342520	339160	369520	365320	329630	257940	213430	260300	286990	231560	293430	366890	317980	319450	344150	302050	357340	345310	329760	316640
Capana01g001115	AROK_SYNJB Shikimate kinase OS=Synechococcus sp. (strain JA-2-3B'a(2-13)) GN=aroK PE=3 SV=1	aroK	41.907	33	129	7	7	523960	538540	528110	496980	470500	487130	538500	562180	538750	496600	521980	520720	458920	470000	466770	450320	474460	456270	455510	472090	442220	338060	311300	353660
Capana01g001119	NAD(P)-bd_dom domain-containing protein	---	29.785	39.3	100	9	9	889730	935460	864100	865240	977500	912650	1203000	1156400	1182100	1105900	1132900	1180400	1019800	1021900	1063300	938960	1042100	978900	953070	939620	962730	1430700	1348300	1310400
Capana01g001121	PLSB_CARTI Glycerol-3-phosphate acyltransferase, chloroplastic OS=Carthamus tinctorius PE=2 SV=1	---	50.443	50.8	310	16	16	948060	922490	907270	937820	934450	919380	904340	896060	869750	1058800	1007100	1006800	957000	949030	969610	908610	886370	867800	937070	938640	973390	1315500	1288600	1305700
Capana01g001122	PG1_PEA Plastoglobulin-1, chloroplastic OS=Pisum sativum GN=PG1 PE=1 SV=1	PG1	17.585	27	31	3	3	107360	82438	90651	50138	0	0	183080	0	143460	70213	130210	43709	122580	110880	68222	52690	175420	139980	33005	81674	148660	0	101150	165030
Capana01g001123	PAP3_BRACM Plastid lipid-associated protein 3, chloroplastic OS=Brassica campestris GN=PAP3 PE=2 SV=1	PAP3	20.179	25.3	43	3	3	665240	641090	697430	643380	636220	646680	930870	911890	888080	952890	919100	915050	779010	700220	742480	752340	782570	851240	815080	877530	838390	1110700	1077100	1016000
Capana01g001131	NOTUM_MOUSE Protein notum homolog OS=Mus musculus GN=Notum PE=2 SV=2	Notum	45.223	10.3	7	3	3	0	0	128740	0	0	0	0	636660	0	0	0	0	0	0	0	0	1205600	0	0	0	0	0	0	1475200
Capana01g001139	Putative ovule protein	---	39.703	3.4	15	1	1	0	0	0	0	0	0	0	0	0	0	0	0	0	0	0	0	0	0	0	0	0	0	0	10126
Capana01g001148	EIF3G_XENTR Eukaryotic translation initiation factor 3 subunit G OS=Xenopus tropicalis GN=eif3g PE=2 SV=1	eif3g	32.348	31.3	124	9	9	481920	513650	499220	486270	490770	520120	484080	458560	491920	652230	630250	606770	505830	499390	529930	451950	458690	479360	539720	512510	525990	682600	675780	672550
Capana01g001153	PARP2_ARATH Poly [ADP-ribose] polymerase 2 OS=Arabidopsis thaliana GN=PARP2 PE=2 SV=1	PARP2	71.458	28.4	113	12	11	178160	183680	168420	155030	142760	146940	161540	153640	169320	148370	149010	130420	177120	171850	162280	181180	186410	164740	198210	177340	182820	118910	121760	118800
Capana01g001164	PPOE_SOLLC Polyphenol oxidase E, chloroplastic OS=Solanum lycopersicum PE=3 SV=1	---	51.007	8.6	1	2	2	0	0	0	0	0	0	0	0	0	0	0	0	0	0	0	0	0	0	0	0	0	0	0	10656000
Capana01g001179	PPOF_SOLLC Polyphenol oxidase F, chloroplastic OS=Solanum lycopersicum PE=3 SV=1	---	66.077	22.3	68	8	8	262920	213010	223100	417830	431210	421850	87949	81150	57120	225750	277940	284020	128020	123520	126220	89132	92749	101780	110580	119420	116240	216780	234880	215350
Capana01g001189	Y4139_ARATH Uncharacterized aarF domain-containing protein kinase At4g31390, chloroplastic OS=Arabidopsis thaliana GN=At4g31390 PE=1 SV=1	At4g31390	45.44	28.3	102	8	8	210820	220830	215710	191360	189610	201740	328040	314480	294520	193470	214630	221990	195060	196050	194700	228810	197340	260550	246630	257830	250190	81718	82810	68703
Capana01g001190	Y4139_ARATH Uncharacterized aarF domain-containing protein kinase At4g31390, chloroplastic OS=Arabidopsis thaliana GN=At4g31390 PE=1 SV=1	At4g31390	33.035	33.3	73	8	8	149050	136560	127790	99671	104200	129820	202810	211550	203570	131730	158640	147870	140110	132570	150550	171360	155590	150450	162120	173900	183730	63507	60615	81328
Capana01g001191	SYTM_ARATH Threonine--tRNA ligase, mitochondrial OS=Arabidopsis thaliana GN=THRRS PE=2 SV=3	THRRS	78.074	52.4	385	30	13	981660	1028700	1010400	1177900	1166900	1152600	982440	991410	988620	861910	802760	831460	1062800	1032400	1076500	1033900	1067400	1060700	964390	948580	976830	873820	911520	878120
Capana01g001197	14KD_DAUCA 14 kDa proline-rich protein DC2.15 OS=Daucus carota PE=2 SV=1	---	13.941	6.6	23	1	1	0	0	0	0	0	0	0	0	0	0	0	0	0	0	0	0	0	0	0	0	0	0	0	166680
Capana01g001202	SYWC_HUMAN Tryptophan--tRNA ligase, cytoplasmic OS=Homo sapiens GN=WARS PE=1 SV=2	WARS	45.714	53.7	252	15	15	1120000	1137200	1105900	1104300	1112100	1100500	1075900	1061100	1060100	1165600	1186200	1144300	1049100	1074300	1074500	1054800	1031900	1005700	981110	973530	963730	1583100	1558300	1514600
Capana01g001207	Putative ovule protein	---	13.421	11.8	20	1	1	0	0	0	0	0	0	0	0	0	0	0	0	0	0	0	0	0	0	0	0	0	0	0	35224
Capana01g001210	E135_ARATH Glucan endo-1,3-beta-glucosidase 5 OS=Arabidopsis thaliana GN=At4g31140 PE=1 SV=1	At4g31140	53.731	16	36	6	6	56523	63699	65538	68647	72708	68230	54043	53193	72036	82557	84118	91879	72783	62201	69547	72605	67210	64766	67443	70866	81282	79189	79814	94013
Capana01g001215	PCBP3_HUMAN Poly(rC)-binding protein 3 OS=Homo sapiens GN=PCBP3 PE=1 SV=2	PCBP3	46.654	41.1	149	12	12	357510	337720	342540	348020	352510	348460	251690	233320	250100	325950	314430	307310	318950	335730	306810	302780	313850	294050	266070	265620	267210	401820	413360	421410
Capana01g001216	P2C60_ARATH Probable protein phosphatase 2C 60 OS=Arabidopsis thaliana GN=At4g31860 PE=2 SV=1	At4g31860	40.211	3.5	8	1	1	0	0	0	0	0	0	0	0	0	0	0	0	0	0	0	0	0	0	0	5557.2	0	0	0	0
Capana01g001218	RS6_ASPOF 40S ribosomal protein S6 OS=Asparagus officinalis GN=rps6 PE=2 SV=1	rps6	28.281	32.1	123	8	3	1573400	1688600	1620500	1520300	1486500	1550100	1850000	1762600	1802000	1517300	1521100	1500400	1618800	1601200	1658200	1720900	1756500	1870100	1923100	1983900	2000300	1048800	1040700	963970
Capana01g001226	inner centromere protein	---	51.109	35.7	192	15	15	698940	630390	637770	619170	635510	634450	631250	635500	649490	550220	572060	536880	665890	650120	653180	633390	609290	555470	620970	649520	654490	544150	607150	599260
Capana01g001229	AIG2L_ARATH AIG2-like protein OS=Arabidopsis thaliana GN=At5g39720 PE=1 SV=1	At5g39720	18.033	44.9	59	4	4	53871	65589	71813	71633	69012	72434	63246	58916	58918	67849	77993	61300	61882	72480	75068	56992	64610	61162	49748	55996	49534	66785	61118	62066
Capana01g001230	ARAK_ARATH L-arabinokinase OS=Arabidopsis thaliana GN=ARA1 PE=1 SV=1	ARA1	95.969	13	81	7	7	167620	152080	156100	161420	172130	164670	125220	129050	94399	112030	97886	96923	142830	151720	164280	144440	135560	118580	135710	112590	107350	60358	52174	53976
Capana01g001266	NEP2_NEPGR Aspartic proteinase nepenthesin-2 OS=Nepenthes gracilis GN=nep2 PE=1 SV=1	nep2	46.785	16.3	26	5	5	54914	43243	38492	0	28841	29901	31024	36688	29809	38551	29697	38574	82415	88267	67379	44326	46395	47458	56068	43979	49455	82284	76795	78940
Capana01g001273	DPOD2_ARATH DNA polymerase delta small subunit OS=Arabidopsis thaliana GN=POLD2 PE=2 SV=2	POLD2	14.748	13.7	11	1	1	0	0	0	0	0	0	0	0	0	0	0	0	0	0	0	0	0	0	0	0	0	0	0	20053
Capana01g001274	DPOD2_ARATH DNA polymerase delta small subunit OS=Arabidopsis thaliana GN=POLD2 PE=2 SV=2	POLD2	22.75	11.8	5	2	2	0	0	0	0	0	0	0	0	0	0	0	0	0	0	0	0	0	0	0	0	0	0	0	26674
Capana01g001284	THT11_TOBAC Tyramine N-feruloyltransferase 4/11 OS=Nicotiana tabacum GN=THT4 PE=2 SV=1	THT4	28.098	4.9	5	1	1	0	0	0	0	0	0	0	0	0	0	0	0	0	21079	0	0	0	0	0	0	0	0	0	0
Capana01g001296	NUP98_HUMAN Nuclear pore complex protein Nup98-Nup96 OS=Homo sapiens GN=NUP98 PE=1 SV=4	NUP98	107.93	13.3	110	10	10	1243100	1095800	1060900	1142900	1156600	1144400	953420	922050	1004100	1281400	1197300	1125400	1020200	1019700	1027900	1185200	1142600	1076000	1260600	1276800	1181700	1588200	1610800	1788600
Capana01g001319	LVSC_DICDI BEACH domain-containing protein lvsC OS=Dictyostelium discoideum GN=lvsC PE=4 SV=2	lvsC	247.66	3.4	22	4	4	538890	357360	441310	544760	477290	459830	595070	685830	650870	0	378830	427260	487420	363530	367920	529520	491310	664400	604160	787340	667250	0	0	0
Capana01g001320	LVSC_DICDI BEACH domain-containing protein lvsC OS=Dictyostelium discoideum GN=lvsC PE=4 SV=2	lvsC	68.989	7.3	4	2	2	11961	10265	0	0	0	0	0	0	0	0	0	0	0	0	0	0	0	0	10150	0	0	0	0	0
Capana01g001324	ESYT3_XENTR Extended synaptotagmin-3 OS=Xenopus tropicalis GN=esyt3 PE=2 SV=1	esyt3	50.118	17.4	83	5	5	274060	264610	255130	257920	241050	247240	281250	274650	280580	262990	256880	257370	277540	277200	282450	300730	303350	279080	284510	288860	314430	181850	196820	214530
Capana01g001326	CXE8_ARATH Probable carboxylesterase 8 OS=Arabidopsis thaliana GN=CXE8 PE=2 SV=1	CXE8	37.891	62.2	297	13	13	1634000	1443700	1470500	1573900	1537500	1516000	1307900	1325600	1316100	1254000	1252100	1201700	1610800	1664500	1729900	1613200	1557200	1568300	1393000	1317500	1353600	1829800	1768000	1885100
Capana01g001327	CID11_SCHPO Poly(A) RNA polymerase cid11 OS=Schizosaccharomyces pombe (strain 972 / ATCC 24843) GN=cid11 PE=2 SV=1	cid11	84.951	2.3	5	1	1	0	0	0	0	0	0	0	0	0	0	0	0	0	0	0	0	0	0	0	0	0	7529.2	0	0
Capana01g001329	GYAR_THEPD Glyoxylate reductase OS=Thermofilum pendens (strain Hrk 5) GN=gyaR PE=3 SV=1	gyaR	35.625	11.1	20	3	3	66055	47987	0	27598	30636	55154	0	0	46488	67722	41834	56718	59400	51063	76624	51594	54647	50828	47597	44712	59802	45398	46556	43789
Capana01g001330	GYAR_THEON Glyoxylate reductase OS=Thermococcus onnurineus (strain NA1) GN=gyaR PE=3 SV=1	gyaR	35.927	21.5	64	5	4	99301	109140	101070	111340	115260	112790	108150	114820	100390	111470	110910	96582	96842	117280	116270	118950	125160	119320	112440	112990	121130	87862	82337	85424
Capana01g001331	GYAR_THEON Glyoxylate reductase OS=Thermococcus onnurineus (strain NA1) GN=gyaR PE=3 SV=1	gyaR	29.659	11.5	9	2	1	0	0	0	0	0	0	0	0	0	0	0	0	0	0	0	0	0	0	0	0	0	4547.2	0	0
Capana01g001333	GAUT1_ARATH Alpha-1,4-galacturonosyltransferase 1 OS=Arabidopsis thaliana GN=GAUT1 PE=1 SV=1	GAUT1	76.036	15	49	7	6	1023200	986710	986670	1185400	1023600	1084000	975330	931350	874410	886050	1121900	529660	931980	1228900	937740	1005500	909330	836300	851530	1039500	737130	730130	751660	565340
Capana01g001342	PLDB1_ARATH Phospholipase D beta 1 OS=Arabidopsis thaliana GN=PLDBETA1 PE=2 SV=4	PLDBETA1	121.52	4	12	3	2	33379	23602	33854	34360	28536	33191	27307	11672	11797	0	0	22061	0	0	34866	25858	0	24074	0	0	0	0	32076	25584
Capana01g001346	GET3_COPC7 ATPase GET3 OS=Coprinopsis cinerea (strain Okayama-7 / 130 / ATCC MYA-4618 / FGSC 9003) GN=GET3 PE=3 SV=1	GET3	40.299	45.8	65	10	10	109510	118770	123090	113930	118690	100610	133470	116870	103590	140220	133740	129010	128300	110960	126110	88431	126310	94139	90144	118310	139060	98570	86737	70913
Capana01g001347	SPXM3_ARATH SPX domain-containing membrane protein At4g22990 OS=Arabidopsis thaliana GN=At4g22990 PE=2 SV=2	At4g22990	77.013	2.5	15	1	1	0	0	0	0	0	0	0	0	0	0	0	0	0	0	0	0	0	0	0	0	0	0	17035	0
Capana01g001358	FN3KR_ARATH Protein-ribulosamine 3-kinase, chloroplastic OS=Arabidopsis thaliana GN=At3g61080 PE=1 SV=2	At3g61080	36.899	43.5	194	10	10	1045900	1074600	993030	1027800	1000600	1032200	1061400	1092700	1065300	1005900	1052600	1027600	981940	943990	986180	1097000	1036300	1041200	853530	916630	855790	1092200	1100400	1186800
Capana01g001363	PX115_ORYSJ Peroxisomal membrane protein 11-5 OS=Oryza sativa subsp. japonica GN=PEX11-5 PE=2 SV=1	PEX11-5	28.264	26.7	65	4	4	162460	153540	157080	146560	147140	135470	140590	163350	156040	134660	116690	108190	108480	90042	93528	92201	104970	79174	86224	92625	76493	117730	130810	123040
Capana01g001375	Nitroreductase domain-containing protein	---	70.819	7.2	23	2	2	37037	27701	30371	33635	26647	28522	26793	30735	24058	19115	18742	16834	0	0	23203	0	22282	21103	23179	0	0	19503	14287	29201
Capana01g001376	ARGI1_ARATH Arginase OS=Arabidopsis thaliana GN=At4g08900 PE=2 SV=1	At4g08900	37.956	47.4	124	9	9	468950	498600	424630	427910	389150	412770	427730	445470	442450	574620	563070	588490	418640	468140	448510	497310	474840	428780	551690	523930	512480	672630	688030	696750
Capana01g001378	AROA1_TOBAC 3-phosphoshikimate 1-carboxyvinyltransferase 1, chloroplastic OS=Nicotiana tabacum GN=EPSPS-1 PE=2 SV=1	EPSPS-1	55.968	44.3	362	15	15	1902600	1903100	1817100	1956200	1933300	1983300	1892900	1818900	1853600	1774600	1810300	1765400	1847500	1831600	1866100	1743400	1759900	1793100	1773400	1768500	1725800	1613000	1600400	1522800
Capana01g001379	GAE3_ARATH UDP-glucuronate 4-epimerase 3 OS=Arabidopsis thaliana GN=GAE3 PE=2 SV=1	GAE3	48.389	8.2	3	2	2	0	0	0	26388	12945	0	0	0	0	0	0	0	0	0	0	0	0	0	0	0	0	0	0	0
Capana01g001380	TRPT1_DANRE tRNA 2'-phosphotransferase 1 OS=Danio rerio GN=trpt1 PE=2 SV=2	trpt1	23.2	28.1	9	3	3	27823	33199	28468	31842	29704	35337	24595	27928	25875	22876	0	22563	22770	24633	25149	26781	25148	0	0	26811	27862	25816	26033	24262
Capana01g001392	TBL2_MOUSE Transducin beta-like protein 2 OS=Mus musculus GN=Tbl2 PE=2 SV=2	Tbl2	47.734	31.7	61	6	6	95675	92916	99194	103530	103570	108670	69476	62282	63085	69306	63467	70946	115390	105450	106410	114940	100560	97150	76751	76807	65609	103550	128360	112430
Capana01g001399	Putative ovule protein	---	24.972	26	21	3	3	41691	80220	32405	0	46658	44067	0	0	50210	0	50552	0	43903	42904	43470	0	0	0	40222	0	54335	0	57160	107210
Capana01g001409	BIG2_HUMAN Brefeldin A-inhibited guanine nucleotide-exchange protein 2 OS=Homo sapiens GN=ARFGEF2 PE=1 SV=3	ARFGEF2	190.88	14.7	100	17	17	248880	273230	251410	201200	221510	181690	287090	269610	288890	186090	188400	125080	136790	130900	143880	234840	258340	246990	273210	242490	266410	0	47532	59473
Capana01g001417	ANKZ1_HUMAN Ankyrin repeat and zinc finger domain-containing protein 1 OS=Homo sapiens GN=ANKZF1 PE=1 SV=1	ANKZF1	75.977	8.2	21	3	3	27517	32558	0	37153	31832	0	0	0	0	0	0	0	12796	18099	0	17413	18057	0	28644	0	0	0	0	0
Capana01g001418	CAID_SALAR Carnitinyl-CoA dehydratase OS=Salmonella arizonae (strain ATCC BAA-731 / CDC346-86 / RSK2980) GN=caiD PE=3 SV=1	caiD	26.759	31	78	7	7	261060	263830	259610	321060	291850	286320	275150	287790	213740	273250	264300	273620	373650	351250	306890	354310	356480	330290	302390	171550	274860	346700	408510	370330
Capana01g001419	FLA10_ARATH Fasciclin-like arabinogalactan protein 10 OS=Arabidopsis thaliana GN=FLA10 PE=1 SV=1	FLA10	43.728	26.7	113	6	6	300290	290570	286380	320690	303630	323250	550610	532580	494750	503780	522430	522240	300290	272590	327810	308700	287720	314350	542350	554870	550780	855690	835990	828970
Capana01g001428	ATPE_ATRBE ATP synthase epsilon chain, chloroplastic OS=Atropa belladonna GN=atpE PE=3 SV=1	atpE	14.777	38.3	1	6	0	0	0	0	0	0	0	0	0	0	0	0	0	0	0	0	0	0	0	0	0	0	0	0	4191300
Capana01g001429	ATPB_IPOCC ATP synthase subunit beta, chloroplastic OS=Ipomoea coccinea GN=atpB PE=3 SV=1	atpB	13.628	26	21	3	1	0	0	0	0	0	0	0	0	0	0	0	0	0	0	0	0	0	0	0	0	0	0	0	29853
Capana01g001432	CFTSY_ARATH Cell division protein FtsY homolog, chloroplastic OS=Arabidopsis thaliana GN=CPFTSY PE=1 SV=2	CPFTSY	30.124	20.4	92	4	4	155340	160830	163740	157020	158340	156140	217110	234580	229250	157700	150990	157440	170280	176960	179100	189430	189010	194680	188160	201390	187710	91923	89696	86455
Capana01g001442	ANL2_ARATH Homeobox-leucine zipper protein ANTHOCYANINLESS 2 OS=Arabidopsis thaliana GN=ANL2 PE=2 SV=1	ANL2	83.763	8.9	15	4	4	43827	42164	41827	38580	38398	36884	29154	31950	21894	0	0	25669	32818	35888	38538	34655	34707	0	33676	30340	27164	21648	0	0
Capana01g001443	PMTD_ARATH Probable methyltransferase PMT13 OS=Arabidopsis thaliana GN=At4g00740 PE=1 SV=1	At4g00740	67.479	5.7	16	2	2	0	0	0	0	0	0	0	0	0	0	12467	0	0	0	0	0	0	0	0	0	0	0	0	0
Capana01g001444	CSN1_ARATH COP9 signalosome complex subunit 1 OS=Arabidopsis thaliana GN=CSN1 PE=1 SV=2	CSN1	50.72	20.5	84	6	6	187480	182370	181980	177510	176880	177370	162040	160850	161440	145490	131220	139430	160570	166540	163920	169490	172680	165890	149830	160900	150490	92174	75096	85496
Capana01g001469	SOT16_ARATH Sulfotransferase 16 OS=Arabidopsis thaliana GN=SOT16 PE=1 SV=1	SOT16	39.664	28.1	56	6	6	312610	299560	365040	380710	324900	311180	183930	209830	209500	154180	162120	152510	164610	169310	312310	142230	133420	142190	136120	231580	138100	133830	167000	151570
Capana01g001480	FABI_BRANA Enoyl-[acyl-carrier-protein] reductase [NADH], chloroplastic OS=Brassica napus PE=1 SV=2	---	42.617	48.7	278	13	11	1525500	1628700	1712800	1692200	1810300	1803100	1914000	1896600	1841300	2464700	2564500	2719000	2044800	1887000	2014000	1933600	1983300	1943600	1958400	1950000	1931600	3354300	3383600	3070500
Capana01g001486	3-oxo-Delta(4,5)-steroid 5-beta-reductase-like	---	44.124	41.2	181	10	3	553290	541130	490820	583090	528690	578630	460830	480420	470270	447980	422870	439830	496250	513890	518310	517210	539390	533340	417300	389080	415700	444750	450230	427760
Capana01g001487	FD6E2_SOYBN Omega-6 fatty acid desaturase, endoplasmic reticulum isozyme 2 OS=Glycine max GN=FAD2-2 PE=2 SV=1	FAD2-2	43.865	16.7	35	4	4	77417	74091	66800	67984	68980	49754	0	0	0	0	0	0	66765	57272	64487	50480	54858	0	28756	33295	38079	65532	76980	71077
Capana01g001493	SRS10_MOUSE Serine/arginine-rich splicing factor 10 OS=Mus musculus GN=Srsf10 PE=1 SV=2	Srsf10	30.393	18.8	48	4	4	215980	201940	208050	137770	171020	184510	202520	189080	190610	290190	274260	276830	171090	171700	167980	177250	184800	187430	264280	260770	229710	119450	118640	115730
Capana01g001504	YUID_BACSU Uncharacterized membrane protein yuiD OS=Bacillus subtilis GN=yuiD PE=4 SV=1	yuiD	27.778	37.4	79	5	5	180710	163100	168660	204820	201560	182740	177220	172180	185730	164460	156420	146430	170250	166170	155660	177070	174740	164480	136780	134440	132430	211960	218840	213190
Capana01g001509	Lipoxygenasey domain-containing protein	---	35.572	7.6	14	2	2	0	28440	26438	24638	29071	0	29689	0	29606	26665	27172	0	37243	28993	30067	32669	27635	29131	22087	24815	0	32174	34927	30971
Capana01g001511	PP2A_TOBAC Serine/threonine-protein phosphatase PP2A catalytic subunit OS=Nicotiana tabacum PE=2 SV=1	---	35.534	38.5	53	8	3	161040	154180	147090	171650	154820	155590	139040	130230	156910	103130	118440	109040	139280	154250	131870	143430	135820	110730	145880	129700	115220	146380	173440	144830
Capana01g001513	RH52_ARATH DEAD-box ATP-dependent RNA helicase 52 OS=Arabidopsis thaliana GN=RH52 PE=2 SV=1	RH52	33.828	33.6	9	8	2	0	0	0	0	40032	27321	0	0	0	0	0	0	0	0	0	0	0	0	0	0	0	0	0	0
Capana01g001516	UGPI5_ARATH Uncharacterized GPI-anchored protein At1g27950 OS=Arabidopsis thaliana GN=At1g27950 PE=1 SV=1	At1g27950	21.234	25.9	56	4	4	558730	549720	477130	491580	501750	606740	754860	716010	708760	596370	511660	372860	457540	472320	321660	567710	575010	586690	577220	554360	572020	788960	795170	823510
Capana01g001519	Putative 6,7-dimethyl-8-ribityllumazine synthase-like	---	27.897	41.4	84	6	6	344880	303440	288480	320050	319370	288630	272090	263850	248500	232500	229010	237800	254620	269250	269430	308630	286780	277290	217680	235570	229820	291170	314870	309460
Capana01g001525	transmembrane protein 45B-like	---	22.515	6.7	0	1	1	0	0	0	0	0	0	0	0	0	0	0	0	0	0	0	0	0	0	0	0	0	0	0	0
Capana01g001532	pollen-specific leucine-rich repeat extensin-like protein 2	---	29.035	14.7	30	2	2	228750	245870	73869	266550	256490	215640	179040	150810	0	148510	157500	0	0	0	282470	293320	257840	256200	0	203090	0	310060	0	290760
Capana01g001540	CALS9_ARATH Callose synthase 9 OS=Arabidopsis thaliana GN=CALS9 PE=2 SV=2	CALS9	242.71	10	141	16	14	317260	323740	328170	302200	261310	307780	290480	334710	323070	340050	287560	299100	239150	244890	231070	262350	254950	272370	309430	329460	283360	57085	72906	0
Capana01g001551	FTHS_SPIOL Formate--tetrahydrofolate ligase OS=Spinacia oleracea PE=1 SV=3	---	57.493	59.1	274	18	18	1500800	1514700	1473300	1531000	1527900	1533300	1410800	1436000	1524600	1340000	1275500	1344500	1574800	1596800	1582600	1501400	1559000	1583100	1555700	1555900	1468800	1407800	1437700	1356900
Capana01g001553	PERX_TOBAC Lignin-forming anionic peroxidase OS=Nicotiana tabacum PE=2 SV=1	---	35.569	53.4	212	10	10	825740	820870	807400	931110	929100	946890	649080	675300	700230	1043000	1055100	1058100	2105300	2075400	2110500	1808300	1809600	1881900	1747100	1688500	1698000	2839800	2929600	2744600
Capana01g001554	PERX_TOBAC Lignin-forming anionic peroxidase OS=Nicotiana tabacum PE=2 SV=1	---	31.912	27.3	30	4	4	223840	182420	205670	99401	115830	138590	169150	0	33661	195400	112800	222570	25578	26600	30775	0	0	0	0	28871	0	68185	77334	74081
Capana01g001555	DIOX_N domain-containing protein	---	15.347	7.5	21	1	1	0	0	0	0	0	0	0	0	0	0	0	0	0	0	0	0	0	0	0	0	0	0	0	37009
Capana01g001574	LOX21_SOLTU Linoleate 13S-lipoxygenase 2-1, chloroplastic OS=Solanum tuberosum GN=LOX2.1 PE=1 SV=1	LOX2.1	89.958	44.6	329	27	18	1386100	1349300	1243600	1045000	1069000	1056100	1239600	1276500	1267900	1095300	1088200	1055600	1030500	1065300	1026200	982130	970420	942490	897340	831200	874650	492610	560770	518010
Capana01g001577	LOX21_SOLTU Linoleate 13S-lipoxygenase 2-1, chloroplastic OS=Solanum tuberosum GN=LOX2.1 PE=1 SV=1	LOX2.1	13.928	79.4	0	6	1	0	0	0	0	0	0	0	0	0	0	0	0	0	0	0	0	0	0	0	0	0	0	0	0
Capana01g001578	LOX21_SOLTU Linoleate 13S-lipoxygenase 2-1, chloroplastic OS=Solanum tuberosum GN=LOX2.1 PE=1 SV=1	LOX2.1	99.998	54.1	872	40	30	9134200	8606800	8397900	7027000	7050300	6946300	8728000	8765400	8713300	6416100	6410200	6487800	16633000	16998000	16984000	20163000	19408000	19211000	16137000	16070000	16113000	9482400	10169000	10459000
Capana01g001582	IDND_VITVI L-idonate 5-dehydrogenase OS=Vitis vinifera GN=VIT_16s0100g00290 PE=1 SV=2	VIT_16s0100g00290	38.194	64.5	349	14	14	1896500	1943200	1932500	2021200	2011900	1966700	2032100	2075800	2040300	1365300	1386700	1450200	1723800	1732400	1658700	1601900	1468700	1613900	1344600	1336600	1316300	1386900	1422400	1408600
Capana01g001586	Y1574_AZOSB UPF0061 protein azo1574 OS=Azoarcus sp. (strain BH72) GN=azo1574 PE=3 SV=1	azo1574	64.448	29.7	157	14	12	334620	318360	298430	318350	297100	300510	324650	338160	336670	280400	314990	283150	364420	345310	338030	372530	332540	322870	319000	328950	329620	258640	260110	258860
Capana01g001587	Peptidase_S15 domain-containing protein	---	19.378	18	23	2	2	44928	41439	36334	32268	0	40947	34777	35073	37566	29546	0	0	63495	63748	56417	0	0	49338	43218	39904	39657	43137	48275	0
Capana01g001608	C7D55_HYOMU Premnaspirodiene oxygenase OS=Hyoscyamus muticus GN=CYP71D55 PE=1 SV=1	CYP71D55	56.197	10.7	19	3	3	92056	105740	90736	0	0	112580	120480	82601	91521	71819	0	73899	87145	92954	87706	109260	90518	0	88937	98108	85882	0	76759	84704
Capana01g001613	FAA28_MYCMM Long-chain-fatty-acid--AMP ligase FadD28 OS=Mycobacterium marinum (strain ATCC BAA-535 / M) GN=fadD28 PE=3 SV=1	fadD28	256.61	0.9	3	2	2	0	0	0	0	0	0	0	0	0	0	0	0	0	0	0	0	0	0	0	0	0	0	0	3517700
Capana01g001616	D-xylose dehydrogenase	---	39.69	48.4	191	13	13	830590	785100	803800	857550	802020	823330	606580	635500	630690	565980	580200	556480	919620	897130	928860	840070	818090	805110	596350	586640	613090	1291800	1315500	1322700
Capana01g001622	GAOX3_ARATH Gibberellin 20 oxidase 3 OS=Arabidopsis thaliana GN=20ox3 PE=2 SV=1	20ox3	27.636	9.8	41	2	2	40478	34710	36404	37019	31089	33297	30489	34469	36248	32893	37025	37354	36613	33128	36923	29995	28721	33630	30218	27544	28108	35937	29754	31455
Capana01g001639	ATG4_MEDTR Cysteine protease ATG4 OS=Medicago truncatula GN=ATG4 PE=3 SV=1	ATG4	52.16	22.3	58	6	5	71915	72497	61741	57621	60195	54508	57495	55916	61397	51209	57134	44186	49320	60915	65699	65012	66299	59997	64421	64417	54221	34915	34732	52769
Capana01g001640	MB32_ARATH Myrosinase-binding protein-like At3g16440 OS=Arabidopsis thaliana GN=At3g16440 PE=2 SV=1	At3g16440	19.65	6.2	13	1	1	0	0	0	0	0	0	0	0	0	0	0	0	0	0	0	0	0	0	0	0	0	0	23279	0
Capana01g001644	PERN_ARMRU Peroxidase N OS=Armoracia rusticana GN=HRPN PE=2 SV=1	HRPN	29.556	23.3	24	4	4	0	0	119790	139160	135240	161810	148830	176730	168320	116730	122610	0	121460	136160	137040	133130	144150	130510	190130	155480	150600	75698	78363	64317
Capana01g001648	PAP12_ARATH Probable plastid-lipid-associated protein 12, chloroplastic OS=Arabidopsis thaliana GN=PAP12 PE=2 SV=1	PAP12	37.05	47.4	174	15	15	965070	979500	1077300	996220	1120900	1190600	1359800	1270700	1201900	1075900	1025900	1085400	1040900	1100900	1113900	817160	1016000	1099300	865310	928560	1009500	1288900	1267400	1239100
Capana01g001660	TAP46_ARATH PP2A regulatory subunit TAP46 OS=Arabidopsis thaliana GN=TAP46 PE=1 SV=2	TAP46	17.442	18.3	12	2	1	42006	41822	35010	0	37792	37402	0	0	0	27290	22684	26173	39690	44564	40806	0	59764	43355	35054	27800	28480	0	0	0
Capana01g001681	DFRA_DIACA Dihydroflavonol-4-reductase OS=Dianthus caryophyllus GN=A PE=2 SV=1	A	35.351	48.8	210	12	11	1349800	1267900	1213100	1311900	1377600	1268100	1021900	993880	1050900	975620	866060	917070	1167100	1084200	1164200	1200700	1233300	1135400	874540	862830	886930	1148300	1182200	1169000
Capana01g001682	DFRA_DIACA Dihydroflavonol-4-reductase OS=Dianthus caryophyllus GN=A PE=2 SV=1	A	36.072	42.6	130	11	10	371830	387590	409470	477950	469450	488930	377260	404200	386410	351890	370670	324470	433260	451450	453520	408560	388890	405700	356930	372050	376650	424660	467490	445160
Capana01g001692	KDM8_MOUSE Lysine-specific demethylase 8 OS=Mus musculus GN=Jmjd5 PE=2 SV=1	Jmjd5	46.509	15	33	3	3	68885	61666	61465	52667	52580	43939	64499	58531	58735	48595	0	28251	52850	55763	47033	61573	49060	44847	59257	53103	51571	0	0	0
Capana01g001697	AB22G_ARATH ABC transporter G family member 22 OS=Arabidopsis thaliana GN=ABCG22 PE=1 SV=1	ABCG22	79.887	18.8	130	10	10	190480	177730	179750	165990	155010	164260	172820	188050	189310	164650	159930	168280	154580	161440	140950	153250	133610	131820	139570	141040	145290	105240	100630	92278
Capana01g001716	protein EMBRYO SAC DEVELOPMENT ARREST 3, chloroplastic-like	---	20.267	24.7	49	3	3	296990	262980	249530	242960	246690	235650	333950	339460	356990	304390	311290	311860	236100	231650	226650	307800	284990	278050	348440	315900	325920	321930	332390	359580
Capana01g001720	RLA12_ARATH 60S acidic ribosomal protein P1-2 OS=Arabidopsis thaliana GN=RPP1B PE=1 SV=2	RPP1B	11.362	89.3	37	4	3	312130	0	493940	0	449280	648150	621670	513170	573390	746430	718370	773260	435780	509980	634990	604030	536340	644230	642590	316710	636090	662270	1359700	1160200
Capana01g001764	E13A_SOLLC Glucan endo-1,3-beta-glucosidase A OS=Solanum lycopersicum PE=1 SV=1	---	31.628	33.9	49	5	4	132930	107700	0	79244	124330	102350	0	0	87623	256640	163020	0	147680	164450	161930	117590	116270	124540	205290	191990	171110	346630	308910	307010
Capana01g001779	RPOC2_SOLTU DNA-directed RNA polymerase subunit beta'' OS=Solanum tuberosum GN=rpoC2 PE=3 SV=1	rpoC2	72.398	17.4	49	7	5	105670	94390	99157	97352	104790	108430	88593	111120	88452	62393	58868	53993	85575	87608	71134	99593	103320	98793	93312	88444	98603	0	0	0
Capana01g001780	RR2_TOBAC 30S ribosomal protein S2, chloroplastic OS=Nicotiana tabacum GN=rps2 PE=3 SV=1	rps2	25.37	47.8	90	6	6	646030	685630	723930	747810	858110	921980	804900	718330	747690	600080	572070	617790	818180	852100	840340	568700	664000	796750	647580	659150	735120	405890	418250	369190
Capana01g001794	ASO_TOBAC L-ascorbate oxidase OS=Nicotiana tabacum GN=AAO PE=2 SV=1	AAO	54.862	7.2	15	2	2	0	0	0	0	0	0	0	0	0	0	0	0	33068	0	22003	19356	15663	0	0	18311	18792	0	0	0
Capana01g001797	PFBS_ARATH Phytochromobilin:ferredoxin oxidoreductase, chloroplastic OS=Arabidopsis thaliana GN=HY2 PE=2 SV=1	HY2	31.003	9.7	11	2	2	17590	0	13380	20536	14323	15076	0	12181	0	16036	15126	0	0	0	15199	16410	13942	0	0	15345	0	13907	0	0
Capana01g001805	AGO4_ARATH Protein argonaute 4 OS=Arabidopsis thaliana GN=AGO4 PE=1 SV=2	AGO4	99.615	55.8	516	33	24	2682900	2807000	2839800	2585000	2592500	2652000	2472800	2490300	2505700	2435100	2273700	2382800	2058900	2079100	2043700	2230100	2391700	2489900	2631100	2679600	2675500	918330	857060	797330
Capana01g001807	HNRPD_HUMAN Heterogeneous nuclear ribonucleoprotein D0 OS=Homo sapiens GN=HNRNPD PE=1 SV=1	HNRNPD	51.8	6.7	13	2	2	0	0	0	0	0	0	0	0	0	0	0	0	0	0	0	0	0	0	248730	0	247830	0	0	0
Capana01g001814	ISPE_SOLLC 4-diphosphocytidyl-2-C-methyl-D-erythritol kinase, chloroplastic/chromoplastic (Fragment) OS=Solanum lycopersicum GN=ISPE PE=1 SV=1	ISPE	45.161	50	302	16	16	1515600	1351100	1330100	1342100	1234600	1203000	1260700	1272100	1341900	1272600	1231300	1228000	1383300	1377300	1395100	1712600	1633900	1594800	1735100	1694600	1648800	1173900	1247500	1286300
Capana01g001826	CNX1_ARATH Molybdopterin biosynthesis protein CNX1 OS=Arabidopsis thaliana GN=CNX1 PE=1 SV=2	CNX1	70.536	45.4	332	18	18	1301400	1246200	1110200	1127400	1094600	1067700	1108700	1090700	1131000	885650	906910	882380	1053900	1084600	1088900	1197900	1116500	1074500	1096100	1093500	1054000	775980	759730	803120
Capana01g001829	NCA2_DICDI Nuclear control of ATPase protein 2 OS=Dictyostelium discoideum GN=nca2 PE=3 SV=1	nca2	24.926	20	29	3	3	35871	39190	39315	33512	36048	37400	52465	47108	55107	39581	32829	40440	37749	40546	39856	54156	45099	43901	0	51232	52972	0	0	20225
Capana01g001830	protein DGS1, mitochondrial	---	38.548	9.7	22	2	2	14065	0	0	0	37284	0	36316	42109	43450	0	0	12470	16880	0	0	0	0	68497	64681	0	64971	0	0	0
Capana01g001831	FHA domain-containing protein	---	18.562	37.9	100	6	6	1019700	1017300	1095800	1123600	1169700	1214200	1508100	1448500	1473900	1865000	1836300	1826400	1171300	1175900	1175900	1035100	1086000	1138300	1402500	1439300	1495500	2225500	2297700	2339400
Capana01g001832	SRRT_ARATH Serrate RNA effector molecule OS=Arabidopsis thaliana GN=SE PE=1 SV=2	SE	21.143	15.6	19	2	2	77339	76462	78900	74962	66134	38545	0	43735	0	130820	111010	100470	88167	93412	90931	80233	79517	78186	87800	120140	91948	142280	109970	161190
Capana01g001833	SRRT_ARATH Serrate RNA effector molecule OS=Arabidopsis thaliana GN=SE PE=1 SV=2	SE	67.601	28.9	178	12	11	380670	341980	354210	321260	349660	346590	293320	312640	309660	377550	367400	361790	333660	330420	332210	317590	288190	297180	362190	356000	353820	265120	284510	294920
Capana01g001835	METE_CATRO 5-methyltetrahydropteroyltriglutamate--homocysteine methyltransferase OS=Catharanthus roseus GN=METE PE=2 SV=1	METE	77.607	30.7	68	17	8	377700	340300	267230	298270	272640	192240	267390	284330	311520	269740	253840	282840	283850	289250	295180	366680	315950	157810	289710	296270	254580	0	198780	200470
Capana01g001848	Dynein heavy chain 5, axonemal like	---	12.606	8.8	24	1	1	0	0	0	0	0	0	0	0	0	0	0	0	0	0	0	0	0	0	0	0	0	0	0	32383
Capana01g001854	BSL3_ARATH Serine/threonine-protein phosphatase BSL3 OS=Arabidopsis thaliana GN=BSL3 PE=1 SV=2	BSL3	64.488	13.2	15	6	2	0	38258	31332	27061	0	0	0	0	0	24984	0	0	30632	0	0	0	0	0	0	0	0	0	0	0
Capana01g001855	BSL3_ARATH Serine/threonine-protein phosphatase BSL3 OS=Arabidopsis thaliana GN=BSL3 PE=1 SV=2	BSL3	40.434	14.1	14	4	0	0	0	0	0	0	0	0	0	0	0	0	0	0	0	0	0	0	0	0	0	0	0	0	12805
Capana01g001857	CLP1_DICDI Protein CLP1 homolog OS=Dictyostelium discoideum GN=clp1 PE=3 SV=1	clp1	44.466	15.5	25	4	4	84679	80238	73386	82427	81091	86334	104220	77278	0	30856	42140	38911	68822	67603	86304	83687	82997	67866	40351	0	72389	47502	45399	36469
Capana01g001865	PSBA_TOBAC Photosystem Q(B) protein OS=Nicotiana tabacum GN=psbA PE=3 SV=2	psbA	26.334	38.5	6	6	1	0	0	0	0	0	0	0	0	0	0	0	0	0	0	0	0	0	0	0	0	0	0	0	164890
Capana01g001866	PSBD_VITVI Photosystem II D2 protein OS=Vitis vinifera GN=psbD PE=3 SV=1	psbD	15.376	12.4	147	2	2	1055900	986700	915200	1027500	989390	928310	622230	606160	662880	741260	742980	742050	976230	989030	966040	937360	843070	789410	574190	589200	552970	967940	1046600	1088400
Capana01g001870	ATPB_COFAR ATP synthase subunit beta, chloroplastic OS=Coffea arabica GN=atpB PE=3 SV=1	atpB	12.008	85.5	17	4	2	100490	149760	0	0	87690	0	0	0	0	51430	117570	264930	0	140290	0	0	38905	39263	0	183830	0	0	0	65223
Capana01g001876	ATPF_SOLTU ATP synthase subunit b, chloroplastic OS=Solanum tuberosum GN=atpF PE=3 SV=1	atpF	18.989	46.3	0	10	1	0	0	0	0	0	0	0	0	0	0	0	0	0	0	0	0	0	0	0	0	0	0	0	0
Capana01g001884	ULA1_ARATH NEDD8-activating enzyme E1 regulatory subunit OS=Arabidopsis thaliana GN=AXR1 PE=1 SV=1	AXR1	38.483	20.8	184	5	5	938960	964990	956790	945410	896590	975140	733710	768490	741270	1293000	1255700	1219300	886000	862480	842430	860010	886860	847970	1004100	991230	951240	1081100	1099900	1099000
Capana01g001931	SERK2_ARATH Somatic embryogenesis receptor kinase 2 OS=Arabidopsis thaliana GN=SERK2 PE=1 SV=1	SERK2	21.287	6.6	11	1	1	0	0	0	0	0	0	0	0	0	0	0	0	0	0	0	0	0	0	0	0	0	0	0	37209
Capana01g001950	Rhodanese-like domain-containing protein 11, chloroplastic	---	15.14	46.3	68	4	4	206370	201820	210570	212400	204840	206290	198260	196830	197190	185540	175200	180740	202820	216580	224100	207260	210440	218160	169320	189670	186660	256690	212950	201410
Capana01g001952	IF5A4_SOLTU Eukaryotic translation initiation factor 5A-4 OS=Solanum tuberosum GN=EIF5A4 PE=2 SV=1	EIF5A4	17.357	61	60	8	5	582060	566480	559750	598810	625460	614040	567220	546360	560480	679320	695420	702900	481490	528210	530780	481130	488290	520140	542920	573690	554010	681640	673480	644240
Capana01g001997	Amidohydro-rel domain-containing protein	---	39.081	38.3	140	9	9	447170	407020	423280	409940	396630	408580	436230	444530	431790	349660	365590	373020	493880	488930	473980	536210	507140	502990	416860	415340	419470	561400	603050	575690
Capana01g002007	CP20B_ARATH Peptidyl-prolyl cis-trans isomerase CYP20-2, chloroplastic OS=Arabidopsis thaliana GN=CYP20-2 PE=1 SV=1	CYP20-2	26.709	50.4	230	10	10	2164900	2580800	2783000	3337400	3391500	3531200	4175200	4129900	3946700	4681100	5052900	4463200	3495700	3168900	3497200	2649500	2825800	3133800	3028800	3253400	3595700	5780200	5814500	5395100
Capana01g002013	BGL40_ARATH Beta-glucosidase 40 OS=Arabidopsis thaliana GN=BGLU40 PE=2 SV=1	BGLU40	52.458	3.3	5	1	1	0	0	0	0	0	0	0	0	0	0	0	0	0	0	0	0	0	0	0	0	0	0	0	4050
Capana01g002025	RUBB_PEA RuBisCO large subunit-binding protein subunit beta, chloroplastic OS=Pisum sativum PE=1 SV=2	---	63.813	65	1732	32	26	19664000	21255000	22416000	20126000	20907000	22026000	22916000	22775000	22924000	27295000	26538000	26445000	21579000	21579000	22064000	18840000	21170000	21577000	24306000	24040000	24682000	20704000	20337000	19406000
Capana01g002042	PUB4_ARATH U-box domain-containing protein 4 OS=Arabidopsis thaliana GN=PUB4 PE=1 SV=3	PUB4	89.122	10.3	22	5	5	0	33202	43578	23581	23190	24760	27327	15909	0	0	0	18715	16851	16117	26323	21606	0	36201	23669	26522	28718	0	0	0
Capana01g002050	YTHD2_HUMAN YTH domain family protein 2 OS=Homo sapiens GN=YTHDF2 PE=1 SV=2	YTHDF2	77.211	25.9	90	13	10	309530	306560	306860	248520	245950	247600	163600	159080	140900	214520	234500	212740	246690	272360	244110	240050	234140	258470	246130	228840	219410	262750	310490	297030
Capana01g002051	YTHD2_HUMAN YTH domain family protein 2 OS=Homo sapiens GN=YTHDF2 PE=1 SV=2	YTHDF2	75.702	20.5	83	10	7	268870	276560	268270	261100	265130	259000	183870	198490	182280	290250	287810	296200	262860	242710	242990	237610	233580	233960	205100	193310	202030	327690	354350	377820
Capana01g002076	KPYC_TOBAC Pyruvate kinase, cytosolic isozyme OS=Nicotiana tabacum PE=2 SV=1	---	12.925	39.7	61	3	2	143480	136760	110410	106780	115450	107050	109190	112860	119110	94317	93457	100450	102160	107010	105930	98646	96757	86382	95147	95051	96351	99627	92004	101700
Capana01g002077	KPYC_TOBAC Pyruvate kinase, cytosolic isozyme OS=Nicotiana tabacum PE=2 SV=1	---	41.58	34	136	8	7	463100	520280	513120	478220	486080	497860	459410	489430	493760	419430	412620	427240	479860	459340	456130	487560	421990	452860	451960	427180	425110	309670	340840	356380
Capana01g002090	DR206_PEA Disease resistance response protein 206 OS=Pisum sativum GN=PI206 PE=2 SV=2	PI206	21.137	13.2	31	2	2	38098	35723	38753	48591	49011	52872	32863	42444	38370	39946	42306	47987	40065	43540	42573	39055	0	34096	32091	27176	32697	49200	52826	49767
Capana01g002103	Putative ATP-dependent RNA helicase A-like	---	47.037	46	190	12	12	397070	404480	381200	315840	320760	332690	391370	388560	395700	435360	455800	458440	319500	323330	295970	381940	368080	333650	489410	497970	455830	256080	233810	236080
Capana01g002128	TMEDA_MESAU Transmembrane protein Tmp21 OS=Mesocricetus auratus GN=TMED10 PE=1 SV=1	TMED10	19.599	37.4	85	5	5	201820	187490	201270	217030	215280	213500	169480	174010	171430	182360	193980	182470	199100	184660	193640	187740	185490	173460	160090	147430	171070	326710	324440	351360
Capana01g002147	PRS8A_ARATH 26S protease regulatory subunit 8 homolog A OS=Arabidopsis thaliana GN=RPT6A PE=2 SV=1	RPT6A	44.645	51.6	391	19	18	1814100	1801300	1791000	1796900	1800800	1780300	1630600	1615900	1587100	1763700	1646400	1725400	1620900	1609300	1596600	1650500	1603600	1569800	1642500	1657300	1631800	1674000	1693800	1691900
Capana01g002164	Putative ovule protein	---	19.114	35.1	91	5	5	176940	182360	192750	230950	220340	223640	181540	176810	177900	256530	246280	240600	227190	223800	238370	178090	198460	210440	165200	165950	170420	369590	359410	361530
Capana01g002169	IPO5_MOUSE Importin-5 OS=Mus musculus GN=Ipo5 PE=1 SV=3	Ipo5	123.18	42.2	418	27	27	1808100	1886000	1702200	1488300	1573800	1548800	2184500	2220100	2193000	1545200	1492700	1503300	1239300	1211500	1153300	1582400	1619500	1632600	1900200	1896000	1893300	329140	328170	238860
Capana01g002181	hypothetical protein	---	13.575	14.5	0	1	1	0	0	0	0	0	0	0	0	0	0	0	0	0	0	0	0	0	0	0	0	0	0	0	0
Capana01g002182	Double-stranded RNA-binding protein 4	---	17.879	16.2	19	1	1	0	0	0	0	0	0	0	0	0	0	0	0	0	0	0	0	0	0	0	0	0	0	0	13488
Capana01g002187	RS92_ARATH 40S ribosomal protein S9-2 OS=Arabidopsis thaliana GN=RPS9C PE=2 SV=1	RPS9C	23.014	40.6	209	8	0	1019800	1110400	1185900	1193800	1199400	1228900	991770	927830	969960	958800	956760	979380	1160700	1143000	1185700	972500	1030100	1073200	1044700	1010800	1054700	580790	628210	604100
Capana01g002192	VDAC2_SOLTU Mitochondrial outer membrane protein porin of 36 kDa OS=Solanum tuberosum PE=1 SV=2	---	29.374	62	220	13	11	1061000	1052400	1027900	1065800	1039200	1031100	1183200	1138000	1152100	1257900	1304500	1293300	1123600	1126200	1107800	1156400	1154000	1067200	1094300	1100500	1121200	1746500	1877900	1782600
Capana01g002197	NU4C_ATRBE NAD(P)H-quinone oxidoreductase chain 4, chloroplastic OS=Atropa belladonna GN=ndhD PE=3 SV=1	ndhD	19.558	9	13	1	1	0	0	0	0	0	0	0	0	0	0	0	0	0	0	0	0	0	0	0	0	0	0	0	32541
Capana01g002214	KINGL_ARATH SNF1-related protein kinase regulatory subunit gamma-1-like OS=Arabidopsis thaliana GN=CBSCBS2 PE=2 SV=1	CBSCBS2	45.779	28.8	94	9	9	206540	241750	221830	234330	277520	317050	267920	236660	242630	240500	248940	260530	223990	207690	219620	226480	210690	201520	199720	208430	207660	338040	306290	305280
Capana01g002218	PPI1_BRUSU Probable peptidyl-prolyl cis-trans isomerase OS=Brucella suis biovar 1 (strain 1330) GN=ppi PE=3 SV=1	ppi	25.86	14.9	19	3	3	0	58541	93677	0	73542	0	0	0	59484	23299	92560	93542	58878	0	0	0	0	0	0	114960	0	148490	159110	81962
Capana01g002225	RS6_LARHH 30S ribosomal protein S6 OS=Laribacter hongkongensis (strain HLHK9) GN=rpsF PE=3 SV=1	rpsF	34.778	20.6	37	3	3	109600	110950	111920	83083	82931	102730	172150	178380	181710	133370	141900	117910	89202	88520	88606	89528	91068	85006	104830	160160	157060	0	0	0
Capana01g002230	SFR2_ORYSJ Beta-glucosidase-like SFR2, chloroplastic OS=Oryza sativa subsp. japonica GN=SFR2 PE=2 SV=1	SFR2	71.72	10.5	53	5	5	110360	101010	89784	102370	86664	91065	111330	110550	106660	80022	73938	77969	91442	93341	93229	100440	105270	102780	85664	89220	82217	55311	56595	63579
Capana01g002235	FCA_ARATH Flowering time control protein FCA OS=Arabidopsis thaliana GN=FCA PE=1 SV=2	FCA	56.229	20	46	6	5	187240	173170	170510	177570	172030	170830	134090	124660	122160	145980	121770	135570	147060	161470	137980	187070	172640	143030	143950	140300	149540	201810	231460	214280
Capana01g002242	RH40_ARATH DEAD-box ATP-dependent RNA helicase 40 OS=Arabidopsis thaliana GN=RH40 PE=2 SV=1	RH40	125.47	19.7	130	16	14	437850	475340	445970	466860	456530	420030	323430	347370	356480	408420	408050	406430	416880	442090	403060	452130	429490	426970	411000	409600	411080	334360	296520	299030
Capana01g002258	GALK1_ARATH Galactokinase OS=Arabidopsis thaliana GN=GAL1 PE=1 SV=2	GAL1	28.309	49.4	118	7	7	418260	393440	355800	378870	377980	346430	390830	391150	391090	221910	249320	210020	370840	393630	372860	347250	351130	326600	349660	325260	328920	304390	281300	261600
Capana01g002259	GALK1_ARATH Galactokinase OS=Arabidopsis thaliana GN=GAL1 PE=1 SV=2	GAL1	23.609	52.1	157	8	8	412310	453050	420790	468250	469620	470900	449880	446910	461230	321680	298480	323400	495610	478710	458410	462820	451000	482780	421190	427830	379540	336260	351240	345140
Capana01g002261	PUR_ARATH Transcription factor Pur-alpha 1 OS=Arabidopsis thaliana GN=PURA1 PE=1 SV=2	PURA1	30.58	31.6	81	6	4	287950	288330	283030	254730	260690	262110	283730	281880	276980	285360	278170	276570	278060	273930	275790	233220	246260	247830	227680	271200	251130	328780	308330	315000
Capana01g002263	AEE7_ARATH Acetate/butyrate--CoA ligase AAE7, peroxisomal OS=Arabidopsis thaliana GN=AAE7 PE=1 SV=1	AAE7	56.875	25	97	8	8	674090	599080	689480	628400	631740	665110	812700	832380	832790	572870	573320	549020	572510	574120	543620	631780	586090	578140	559570	591450	560390	381990	344160	372620
Capana01g002271	AMSH3_ARATH AMSH-like ubiquitin thioesterase 3 OS=Arabidopsis thaliana GN=AMSH3 PE=1 SV=2	AMSH3	58.498	3.9	5	1	1	0	0	0	0	0	0	0	0	0	0	0	0	0	0	0	0	0	0	0	0	0	0	0	4355
Capana01g002272	IMA1_ARATH Importin subunit alpha-1 OS=Arabidopsis thaliana GN=KAP1 PE=1 SV=2	KAP1	57.026	65	372	20	17	1912200	1798700	1786200	1748500	1750400	1680100	1529700	1573200	1567100	1614700	1616700	1621900	1742400	1766100	1697700	1918700	1838000	1827500	2030300	1924500	1944500	1281600	1289800	1317500
Capana01g002304	SAR2_SOLLC GTP-binding protein SAR2 OS=Solanum lycopersicum GN=SAR2 PE=2 SV=1	SAR2	27.912	45.5	70	7	4	200230	179210	173520	201960	196470	176770	125600	133560	137730	155330	154760	149960	201060	187670	200880	209860	204250	196110	149400	141020	151390	284520	285660	302280
Capana01g002305	CMTA5_ARATH Calmodulin-binding transcription activator 5 OS=Arabidopsis thaliana GN=CMTA5 PE=2 SV=2	CMTA5	104.52	2.9	6	2	2	0	10305	0	0	0	0	0	0	0	0	0	0	0	0	0	0	0	0	0	0	0	0	0	0
Capana01g002312	Putative ovule protein	---	91.698	20	185	12	12	285880	290950	297740	319900	325840	305430	263550	280000	265790	286210	279700	275620	284510	286330	302310	282180	284470	275760	275390	258810	252120	213720	217100	219020
Capana01g002319	PHYB_SOLTU Phytochrome B OS=Solanum tuberosum GN=PHYB PE=3 SV=2	PHYB	78.61	31.1	78	15	15	252380	247660	221240	219130	222490	176810	210750	257920	267720	150200	153560	153940	216140	199870	218180	256000	249030	236810	218270	247000	215590	61771	77569	69310
Capana01g002320	ACLB1_ORYSJ ATP-citrate synthase beta chain protein 1 OS=Oryza sativa subsp. japonica GN=ACLB-1 PE=2 SV=1	ACLB-1	65.733	54.4	429	21	8	2963200	2885700	2988500	3152400	3181000	3109400	2818700	2739200	2760100	2874100	2819900	2839500	3009200	3162700	3166800	2981600	3060900	3079100	2784500	2779000	2643500	3575000	3497600	3450900
Capana01g002323	E132_SOLTU Glucan endo-1,3-beta-glucosidase, basic isoform 2 OS=Solanum tuberosum GN=GLUB2 PE=2 SV=1	GLUB2	39.57	42	79	10	10	29057	42196	38631	74545	51325	75669	74376	67714	37192	94234	89733	111420	697970	720230	654550	466260	475710	511720	465530	445320	480720	1103800	1051500	1047400
Capana01g002326	USPAL_ARATH Universal stress protein A-like protein OS=Arabidopsis thaliana GN=At3g01520 PE=1 SV=2	At3g01520	12.399	53.6	46	4	4	404260	396570	361000	398760	404290	402150	355590	370560	360260	420810	417080	428290	388040	402060	389050	341340	378290	374090	277230	291360	281580	462930	463860	426840
Capana01g002330	CRT_CLOAB 3-hydroxybutyryl-CoA dehydratase OS=Clostridium acetobutylicum GN=crt PE=3 SV=1	crt	29.45	26.4	52	5	5	359220	379560	374120	363300	332420	322490	382190	404670	365890	364950	375150	394430	451180	464570	440360	454670	437920	416720	425990	399570	399520	396270	376140	363360
Capana01g002363	TPR_REGION domain-containing protein	---	45.499	24.2	49	6	6	136530	116290	116630	115500	124310	85787	97073	109330	90431	126420	105920	92026	130050	119320	114410	103020	107610	109570	86401	96470	87374	109040	120260	111490
Capana01g002397	RR1_SPIOL 30S ribosomal protein S1, chloroplastic OS=Spinacia oleracea GN=RPS1 PE=1 SV=1	RPS1	44.76	54.3	400	17	13	5327700	5283500	5871700	5078000	5421200	5514700	7727500	7327700	7552700	7280100	7263100	7103600	6076300	6165000	6224300	5607000	5775200	6175000	7025800	7114400	7353500	5700600	5622000	5642700
Capana01g002398	CB5_ARATH Chlorophyll a-b binding protein CP26, chloroplastic OS=Arabidopsis thaliana GN=LHCB5 PE=2 SV=1	LHCB5	30.634	49.5	321	14	14	14955000	14258000	13709000	12612000	14772000	13208000	15970000	15991000	16295000	15129000	15541000	15082000	13957000	13760000	14858000	13765000	15605000	14600000	13888000	14981000	14226000	23498000	23493000	22972000
Capana01g002411	RL7A2_ARATH 60S ribosomal protein L7a-2 OS=Arabidopsis thaliana GN=RPL7AB PE=1 SV=1	RPL7AB	29.304	28.3	76	9	9	729970	682980	651640	662880	625390	667080	747070	791060	773350	624490	686110	652970	584860	511130	569680	805480	771720	754460	880000	917820	920510	192770	214240	206120
Capana01g002430	AKH_DAUCA Bifunctional aspartokinase/homoserine dehydrogenase, chloroplastic (Fragment) OS=Daucus carota PE=1 SV=1	---	50.743	35.3	78	10	7	243190	243240	244700	157820	177170	180790	184210	187340	171720	159750	176860	208610	192320	197000	198570	166020	189190	169780	205030	190900	189440	72115	74179	94552
Capana01g002431	AKH_DAUCA Bifunctional aspartokinase/homoserine dehydrogenase, chloroplastic (Fragment) OS=Daucus carota PE=1 SV=1	---	52.961	24.8	21	8	4	110560	97885	93896	56049	71429	51942	55554	58651	72654	63436	75337	65492	68032	74707	76247	67885	52126	51810	40689	51133	50798	35169	36589	21365
Capana01g002433	Putative transmembrane protein 41B-like	---	18.197	11	23	1	1	0	0	0	0	0	0	0	0	0	0	0	0	0	0	0	0	0	0	0	0	0	0	0	22190
Capana01g002441	RL15_PETHY 60S ribosomal protein L15 OS=Petunia hybrida GN=RPL15 PE=2 SV=1	RPL15	24.219	32.4	4	6	1	0	0	0	0	0	0	0	0	0	0	0	0	0	0	0	0	0	0	0	9426.3	0	0	0	0
Capana01g002460	ODB2_HUMAN Lipoamide acyltransferase component of branched-chain alpha-keto acid dehydrogenase complex, mitochondrial OS=Homo sapiens GN=DBT PE=1 SV=3	DBT	55.036	50.7	281	18	18	761450	717530	686670	674830	734820	700090	724370	739050	764100	643250	653630	651330	727090	752970	738120	800650	791940	779110	746710	752400	722420	659190	651140	695110
Capana01g002475	FAHD1_DICDI Acylpyruvase FAHD1, mitochondrial OS=Dictyostelium discoideum GN=fahd1 PE=3 SV=1	fahd1	30.473	8.2	0	1	1	0	0	0	0	0	0	0	0	0	0	0	0	0	0	0	0	0	0	0	0	0	0	0	0
Capana01g002495	Y1399_ARATH Probable esterase At1g33990 OS=Arabidopsis thaliana GN=At1g33990 PE=1 SV=1	At1g33990	39.54	5.1	5	1	1	0	0	0	0	0	0	0	0	0	0	0	0	0	0	0	0	0	0	0	0	0	0	0	16122
Capana01g002514	IF2G_CHICK Eukaryotic translation initiation factor 2 subunit 3 OS=Gallus gallus GN=EIF2S3 PE=1 SV=1	EIF2S3	50.744	35.3	163	11	6	994400	924770	956570	1036200	1020600	1015900	878890	863350	909550	746580	744140	749900	891680	894560	901840	896940	890640	880200	802140	771560	782420	614900	621930	656690
Capana01g002515	SMU1_CHICK WD40 repeat-containing protein SMU1 OS=Gallus gallus GN=SMU1 PE=2 SV=1	SMU1	58.132	21.6	60	8	8	90401	99539	103840	115830	111930	120920	79438	79507	79783	88295	86005	75074	101970	96219	87553	89269	94029	82133	79938	79885	88785	94187	106760	100720
Capana01g002517	Putative thymidylate synthase-like	---	15.216	27.4	36	2	2	166290	146220	0	0	159550	175430	192630	149850	164890	187730	177020	181320	150100	141600	149460	140470	146350	136360	185160	182810	174080	228170	205320	228540
Capana01g002545	protein EMSY-LIKE 3 isoform X1	---	53.437	10.3	19	3	3	0	31621	22773	29970	25466	19526	0	0	18505	11968	32992	21840	31411	24627	0	11754	19099	22205	0	30507	0	0	17582	0
Capana01g002552	SCC13_ARATH Sister chromatid cohesion 1 protein 3 OS=Arabidopsis thaliana GN=SYN3 PE=2 SV=2	SYN3	27.235	6.3	0	1	1	0	0	0	0	0	0	0	0	0	0	0	0	0	0	0	0	0	0	0	0	0	0	0	0
Capana01g002556	DNAJ1_ARATH Chaperone protein dnaJ 1, mitochondrial OS=Arabidopsis thaliana GN=ATJ1 PE=2 SV=2	ATJ1	37.712	30.1	40	6	6	63964	76526	77924	55711	58073	55136	58936	65361	67109	55461	54982	56558	68138	57393	63584	76824	37266	78044	84563	82212	77483	68071	69691	80798
Capana01g002560	RLGP1_ORYSJ Ras-related protein RGP1 OS=Oryza sativa subsp. japonica GN=RGP1 PE=2 SV=2	RGP1	24.973	20.4	21	3	2	29672	23942	30204	23840	27417	30255	0	0	27393	28775	22143	0	29329	32284	45917	0	23319	30403	24501	0	0	0	0	0
Capana01g002562	SUGP1_ARATH SURP and G-patch domain-containing protein 1-like protein OS=Arabidopsis thaliana GN=At3g52120 PE=2 SV=1	At3g52120	47.221	5.1	7	2	2	0	0	0	0	0	0	0	0	0	0	0	0	0	0	0	0	0	0	0	0	0	0	0	12548
Capana01g002567	DR100_ARATH DNA-damage-repair/toleration protein DRT100 OS=Arabidopsis thaliana GN=DRT100 PE=2 SV=2	DRT100	39.445	20.1	34	5	5	24846	0	28659	37979	40098	24987	0	0	0	0	0	0	120450	109970	98902	86001	101490	103980	54327	50861	50185	233420	227260	244200
Capana01g002575	PAB2A_XENLA Polyadenylate-binding protein 2-A OS=Xenopus laevis GN=pabpn1-a PE=2 SV=1	pabpn1-a	77.373	9.6	57	4	4	63933	57803	57739	52378	58745	59674	44811	46130	50713	69540	65736	71937	56829	52020	56758	46509	55968	54123	72809	64589	65153	74586	78373	83333
Capana01g002586	TL19_ARATH Thylakoid lumenal 19 kDa protein, chloroplastic OS=Arabidopsis thaliana GN=At3g63540 PE=1 SV=2	At3g63540	26.667	43.9	83	6	6	881320	945820	938320	933920	914740	951110	1113100	1141000	1080100	1367900	1303000	1324000	806150	797990	803230	758530	755210	770550	961860	916810	921040	1445500	1418800	1384500
Capana01g002599	ATPO_IPOBA ATP synthase subunit O, mitochondrial OS=Ipomoea batatas PE=1 SV=1	---	26.163	41.5	152	8	8	729520	966030	1034800	980040	1062500	1126200	1347200	1314000	1265900	1542900	1551500	1560400	1183200	1220100	1215500	979660	1166400	1221600	1322200	1290100	1335600	2218000	2078800	2082300
Capana01g002602	RL6_MESCR 60S ribosomal protein L6 OS=Mesembryanthemum crystallinum GN=RPL6 PE=2 SV=1	RPL6	20.866	7.6	19	1	1	0	0	0	0	0	0	0	0	0	0	0	0	0	0	0	0	0	0	0	0	0	0	0	182950
Capana01g002607	Putative ovule protein	---	25.5	17.6	35	3	3	258390	296150	290000	350000	337350	348910	277540	313500	375470	438360	352250	329140	349410	243310	112390	324460	323330	349380	336880	268900	296340	359900	309600	0
Capana01g002611	CESA3_ARATH Cellulose synthase A catalytic subunit 3 [UDP-forming] OS=Arabidopsis thaliana GN=CESA3 PE=1 SV=2	CESA3	120.98	15.1	31	11	9	160470	139160	186920	126420	150720	139930	98748	107810	99319	75842	74101	0	161660	154760	149950	123180	162270	109950	79626	99847	116650	140690	102900	67553
Capana01g002612	Putative ovule protein (Fragment)	---	19.779	24.3	1	2	2	0	0	0	0	0	0	0	0	0	0	0	0	0	0	0	0	0	0	0	0	0	0	0	514750
Capana01g002623	CCD1_PHAVU Carotenoid 9,10(9',10')-cleavage dioxygenase 1 OS=Phaseolus vulgaris GN=CCD1 PE=1 SV=1	CCD1	58.788	40.5	329	16	10	1431100	1313500	1266100	1214900	1213600	1107500	1525500	1556500	1617100	1040200	1101200	1077100	1242500	1233000	1281800	1456800	1404400	1305900	1265500	1249300	1198200	742270	762870	812770
Capana01g002624	CCD1_ARATH Carotenoid 9,10(9',10')-cleavage dioxygenase 1 OS=Arabidopsis thaliana GN=CCD1 PE=1 SV=2	CCD1	52.026	38.4	55	13	7	150090	136390	134730	120760	107260	105670	166650	165510	157220	109200	109510	110390	115700	113510	124500	164580	139620	103770	151550	140410	149940	0	78232	74514
Capana01g002634	FTRV_MAIZE Ferredoxin-thioredoxin reductase, variable chain OS=Zea mays PE=1 SV=1	---	17.009	51.3	103	7	7	1826900	1829000	1970500	1867400	1783500	1871000	2354800	2326100	2381700	2569500	2580800	2512600	1942000	2017200	1953600	1772400	1845200	1920800	2082200	2137000	2157400	3267800	3076200	2558600
Capana01g002638	Putative F17A17.37 protein-like	---	31.576	32	137	8	8	416470	380270	369000	502740	496250	488460	318600	301070	282350	496250	460550	502750	315720	335220	331160	327320	274040	296520	249900	248310	264380	641080	609260	621760
Capana01g002641	SMT1_ORYSJ Cycloartenol-C-24-methyltransferase 1 OS=Oryza sativa subsp. japonica GN=Smt1-1 PE=2 SV=1	Smt1-1	28.777	42.1	69	8	8	175450	146400	139100	144880	134720	139280	81784	88376	79688	141630	121640	106230	131800	148490	161890	114230	163290	130180	96730	113410	106660	233430	217910	232390
Capana01g002649	SUBL_ARATH Subtilisin-like protease OS=Arabidopsis thaliana GN=ARA12 PE=1 SV=1	ARA12	86.965	24.8	51	13	8	0	0	0	0	0	0	0	0	0	0	0	60191	179180	192940	191420	159310	156240	145890	136480	137890	137540	192600	213480	215940
Capana01g002650	SUBL_ARATH Subtilisin-like protease OS=Arabidopsis thaliana GN=ARA12 PE=1 SV=1	ARA12	80.308	24.3	23	13	4	0	0	0	0	0	0	0	0	0	0	0	0	136280	134860	140320	129150	140060	113360	135930	109040	104680	0	80082	115580
Capana01g002653	SUBL_ARATH Subtilisin-like protease OS=Arabidopsis thaliana GN=ARA12 PE=1 SV=1	ARA12	82.689	12.6	2	8	1	0	0	0	0	0	0	0	0	0	0	0	0	0	0	0	0	0	0	0	0	0	0	0	182070
Capana01g002658	SUBL_ARATH Subtilisin-like protease OS=Arabidopsis thaliana GN=ARA12 PE=1 SV=1	ARA12	79.481	39.3	287	20	14	1918500	1870000	1796500	1982200	1897800	1831100	1607300	1612600	1633400	1607000	1660700	1612000	1872700	1883100	1789000	1808200	1689300	1635400	1544700	1507900	1489800	1598900	1617000	1651800
Capana01g002663	ANAG_HUMAN Alpha-N-acetylglucosaminidase OS=Homo sapiens GN=NAGLU PE=1 SV=2	NAGLU	92.347	20.8	109	13	13	246660	240630	236050	264400	240280	266410	208710	221450	201380	267000	260220	268810	253090	257880	255060	231230	224900	227620	187550	196630	198210	388740	382570	399030
Capana01g002670	COG8_MOUSE Conserved oligomeric Golgi complex subunit 8 OS=Mus musculus GN=Cog8 PE=2 SV=3	Cog8	64.219	2.8	18	1	1	0	0	0	0	0	0	0	0	0	0	0	0	0	0	0	0	0	0	0	0	0	4818.5	0	0
Capana01g002672	YC47_SCHPO Uncharacterized WD repeat-containing protein C1672.07 OS=Schizosaccharomyces pombe (strain 972 / ATCC 24843) GN=SPCC1672.07 PE=2 SV=1	SPCC1672.07	93.63	3	7	2	2	71582	0	71900	63175	58534	0	0	0	0	0	0	0	0	0	0	0	0	0	0	0	0	0	0	0
Capana01g002674	Putative ovule protein	---	29.824	19	24	4	3	117200	0	115290	125480	136780	134310	118940	135820	126450	88764	0	105320	107450	0	114610	90167	113930	128050	117840	110740	0	149770	165320	0
Capana01g002676	Putative ovule protein	---	28.345	8.5	19	2	1	0	0	0	0	0	0	0	0	0	0	0	0	0	0	0	0	0	0	0	0	0	0	0	173390
Capana01g002678	RK1_ARATH 50S ribosomal protein L1, chloroplastic OS=Arabidopsis thaliana GN=RPL1 PE=1 SV=1	RPL1	37.561	35.2	172	11	11	1660200	1644800	1713700	1808800	1830200	1769700	2013600	1899100	1988800	2402100	2391500	2443000	1718900	1700300	1698800	1628600	1596800	1649300	1943000	1926300	2056400	2379500	2384300	2542600
Capana01g002681	protein RETICULATA-RELATED 4, chloroplastic-like	---	40.685	33.7	207	9	9	543690	634220	720510	847800	877280	885020	895730	802640	789680	668760	635140	647030	803900	838010	843760	753960	769590	845670	595960	601510	640280	1140700	1075500	1063200
Capana01g002683	Y2910_ARATH Putative gamma-glutamylcyclotransferase At3g02910 OS=Arabidopsis thaliana GN=At3g02910 PE=2 SV=2	At3g02910	18.838	35.5	33	3	3	0	156270	186500	170290	148560	0	0	0	0	139000	0	143360	155730	164110	175480	193190	167960	37627	174210	163750	152820	79468	0	0
Capana01g002684	NAA11_MOUSE N-alpha-acetyltransferase 11 OS=Mus musculus GN=Naa11 PE=2 SV=1	Naa11	16.849	20.5	32	2	2	55741	47494	52564	53543	50432	57697	0	26657	26775	21264	23687	0	39172	39067	0	0	0	0	0	0	0	0	0	23939
Capana01g002705	SC31A_CHICK Protein transport protein Sec31A OS=Gallus gallus GN=SEC31A PE=2 SV=1	SEC31A	124.47	47.1	527	31	31	2232300	2128900	2186100	2211900	2085100	2150400	2001100	1958500	2023300	1666200	1637400	1668900	1918900	1926500	1909200	1955300	1855000	1950400	1878500	1839200	1835300	1268200	1280100	1261800
Capana01g002707	MTL13_BOVIN Methyltransferase-like protein 13 OS=Bos taurus GN=METTL13 PE=2 SV=1	METTL13	32.963	15.8	24	3	3	0	69299	55590	61041	58289	60097	53409	61723	63170	51913	48320	42509	53112	45594	48022	47942	49350	44821	40739	51480	50011	69226	49906	0
Capana01g002713	Putative ovule protein	---	15.442	15.2	24	1	1	0	0	0	0	0	0	0	0	0	0	0	0	0	0	0	0	0	0	0	0	0	0	0	50343
Capana01g002717	UBP24_ARATH Ubiquitin carboxyl-terminal hydrolase 24 OS=Arabidopsis thaliana GN=UBP24 PE=1 SV=1	UBP24	58.212	21.7	36	7	7	118140	73050	96887	138290	111040	109010	49104	84793	83203	68872	73319	42164	67697	81609	46037	75488	175030	109680	108920	0	0	92114	100320	0
Capana01g002722	MNMG_SYNY3 tRNA uridine 5-carboxymethylaminomethyl modification enzyme MnmG OS=Synechocystis sp. (strain PCC 6803 / Kazusa) GN=mnmG PE=3 SV=1	mnmG	79.219	4.5	14	2	2	18590	0	0	14674	0	14399	0	0	0	0	0	0	0	16104	15889	0	0	0	0	0	0	0	0	0
Capana01g002747	CXE13_ARATH Probable carboxylesterase 13 OS=Arabidopsis thaliana GN=CXE13 PE=2 SV=1	CXE13	33.795	32.1	54	6	6	112710	103510	100210	108940	85739	120860	55331	85350	99673	106390	110440	92740	109350	107820	86746	90085	105440	96448	74437	73519	66043	186200	194360	174160
Capana01g002748	YJ01_SCHPO LIM domain and RING finger protein C1223.01 OS=Schizosaccharomyces pombe (strain 972 / ATCC 24843) GN=SPCC1223.01 PE=1 SV=2	SPCC1223.01	108.41	3.8	15	2	2	28992	17592	15396	0	15288	0	0	0	0	0	0	0	0	0	0	0	0	0	0	13744	0	0	0	0
Capana01g002750	TBCA_ARATH Tubulin-specific chaperone A OS=Arabidopsis thaliana GN=At2g30410 PE=1 SV=2	At2g30410	28.231	12.2	50	4	4	147390	148970	115430	167500	159390	144390	161100	134500	136860	209210	199420	187170	165960	57831	153470	150830	141290	171300	175090	160590	180560	141200	54672	120320
Capana01g002756	PPOC_TOBAC Protoporphyrinogen oxidase, chloroplastic OS=Nicotiana tabacum GN=PPXI PE=2 SV=1	PPXI	60.134	53.3	319	19	19	3221100	3175000	2760400	2958200	2860300	2801200	2775700	2758300	2945300	2709000	2638300	2740800	2924700	2956500	3031900	2956200	2725100	2767100	2776900	2622700	2570400	2917600	2999200	3105500
Capana01g002758	H32_TOBAC Histone H3.2 OS=Nicotiana tabacum GN=B34 PE=1 SV=1	B34	15.254	30.1	23	2	1	0	4126500	0	3342800	0	0	0	0	0	2328900	0	0	0	0	3558200	0	0	0	0	0	0	0	0	0
Capana01g002759	PDK_SCHPO [Pyruvate dehydrogenase [lipoamide]] kinase, mitochondrial OS=Schizosaccharomyces pombe (strain 972 / ATCC 24843) GN=SPAC644.11c PE=2 SV=1	SPAC644.11c	42.389	23.2	85	6	6	211980	210240	220520	212770	202910	185900	196310	203210	218270	193460	205950	238570	191500	192610	207240	240110	225020	210490	191940	186670	207560	285710	283530	279090
Capana01g002765	Polyketide_cyc domain-containing protein	---	31.442	16.1	63	3	3	85502	89321	88550	76224	79149	75554	110840	106920	102490	88943	82898	84884	102150	96074	97064	92465	97865	97228	100890	110160	105130	56312	57295	63429
Capana01g002766	PALD_HUMAN Paladin OS=Homo sapiens GN=PALD PE=1 SV=3	PALD	116.69	8.6	9	5	5	58960	56199	48140	52634	47586	55775	53408	73309	64737	0	52085	49630	43429	53535	0	61879	65149	62920	0	59908	47238	0	0	0
Capana01g002778	NEMF_DROME Nuclear export mediator factor NEMF homolog OS=Drosophila melanogaster GN=Clbn PE=1 SV=2	Clbn	84.16	8.6	17	4	4	0	17639	17445	15969	16621	15378	19343	18609	20708	18318	0	17264	18528	20874	0	14934	14758	0	0	20330	29083	0	0	0
Capana01g002779	NEMF_MOUSE Nuclear export mediator factor Nemf OS=Mus musculus GN=Nemf PE=1 SV=2	Nemf	44.691	10.9	28	2	2	34144	31438	29846	27885	0	20262	32054	36606	36605	0	0	0	0	0	0	34691	35683	26802	37722	40381	35698	0	0	0
Capana01g002783	AQR_HUMAN Intron-binding protein aquarius OS=Homo sapiens GN=AQR PE=1 SV=4	AQR	175.5	10	26	8	8	33696	0	24419	0	29526	0	60866	66457	96313	45451	46268	37173	0	28669	0	60657	64227	60303	129160	125780	107640	0	0	0
Capana01g002787	Putative ovule protein	---	31.751	9	4	2	2	0	0	0	0	0	0	0	0	0	0	0	0	0	0	0	0	0	0	0	0	0	42668	0	52921
Capana01g002802	DHX15_ARATH Probable pre-mRNA-splicing factor ATP-dependent RNA helicase OS=Arabidopsis thaliana GN=At2g47250 PE=2 SV=1	At2g47250	82.354	27.9	135	14	14	283970	298530	285870	269120	255220	265130	239850	239740	231030	199920	244350	197330	253690	227600	244850	204320	232450	232070	270270	263140	267900	106040	100460	98487
Capana01g002806	LACS1_ARATH Long chain acyl-CoA synthetase 1 OS=Arabidopsis thaliana GN=LACS1 PE=2 SV=1	LACS1	75.325	38.9	183	17	17	652760	676510	652020	643230	595300	614940	544400	531570	616850	493420	529060	538130	646790	662130	679720	665750	656600	677370	611350	589490	599400	376980	350280	334250
Capana01g002807	Putative ovule protein	---	55.624	16.4	20	5	4	53672	45462	45830	46844	40588	40995	55812	39620	33904	53719	54020	58594	46406	55762	48416	47698	43901	0	41388	30289	39672	48645	42392	49831
Capana01g002808	Putative ovule protein	---	46.747	13.5	33	4	4	57597	40466	37453	39896	38212	25840	28286	32970	29614	54790	42392	44864	39536	40155	40264	50848	48699	38795	52750	39084	44229	49786	56199	67127
Capana01g002811	NIFU1_ARATH NifU-like protein 1, chloroplastic OS=Arabidopsis thaliana GN=NIFU1 PE=1 SV=1	NIFU1	11.949	64	52	4	4	310730	313560	286050	339140	317540	327800	417720	396460	381870	394050	416180	456600	232560	300850	294630	283820	279780	283800	351540	375380	355420	434300	480510	483090
Capana01g002812	NIFU1_ARATH NifU-like protein 1, chloroplastic OS=Arabidopsis thaliana GN=NIFU1 PE=1 SV=1	NIFU1	11.438	14.4	10	1	1	0	0	0	0	0	0	0	0	0	0	0	0	0	0	0	0	0	0	0	0	0	0	0	21723
Capana01g002828	Polyketide_cyc domain-containing protein	---	28.416	9.9	53	2	2	229000	258610	279300	275400	277750	276220	333530	337740	342920	331370	319280	324460	304780	303980	322370	313390	319890	320650	293290	292800	284510	471270	476090	471610
Capana01g002836	PSBA_TOBAC Photosystem Q(B) protein OS=Nicotiana tabacum GN=psbA PE=3 SV=2	psbA	31.281	3.9	0	1	1	0	0	0	0	0	0	0	0	0	0	0	0	0	0	0	0	0	0	0	0	0	0	0	0
Capana01g002853	Putative calcium and calcium/calmodulin-dependent serine/threonine-protein kinase-like	---	48.095	20	79	6	6	143560	140000	135680	127670	110860	123460	119730	122690	127300	128770	124450	117320	127820	127200	130910	104300	128050	114080	125600	124290	113250	152150	172760	160800
Capana01g002857	CEFD_STRCL Isopenicillin N epimerase OS=Streptomyces clavuligerus GN=cefD PE=1 SV=3	cefD	50.302	32	110	10	10	266600	251370	255990	290090	277210	268570	198520	185470	200890	172190	173650	197670	230440	225600	223620	227640	227690	228690	192720	180680	226110	260040	263870	256960
Capana01g002858	SEC23_PICGU Protein transport protein SEC23 OS=Meyerozyma guilliermondii (strain ATCC 6260 / CBS 566 / DSM 6381 / JCM 1539 / NBRC 10279 / NRRL Y-324) GN=SEC23 PE=3 SV=3	SEC23	95.249	17.3	59	8	8	114210	107790	134230	111230	107840	132540	125830	94975	124340	62587	80383	88530	113580	117870	115420	101410	105500	103950	103570	91875	105360	79353	111780	98663
Capana01g002859	SECA1_ARATH Protein translocase subunit SECA1, chloroplastic OS=Arabidopsis thaliana GN=SECA1 PE=1 SV=2	SECA1	45.659	47.7	266	15	15	895640	930330	893480	815930	813650	799040	1039400	1025900	1013000	843060	819460	852530	686100	706190	689690	734180	702390	715720	795240	809150	836460	378270	399610	400400
Capana01g002860	SECA_SPIOL Protein translocase subunit SecA, chloroplastic OS=Spinacia oleracea GN=secA PE=2 SV=1	secA	54.71	34.5	175	16	16	808220	859170	770630	711810	708160	729450	903540	911890	884710	776940	800150	787220	644540	647850	646210	646980	665120	676740	677000	644770	701950	270120	272730	286860
Capana01g002866	RH24_ARATH DEAD-box ATP-dependent RNA helicase 24 OS=Arabidopsis thaliana GN=RH24 PE=1 SV=2	RH24	84.313	4.9	12	3	3	0	31775	24810	0	0	23666	25455	21434	26747	29435	22229	25409	23232	0	0	32798	0	0	33997	35239	0	0	0	0
Capana01g002871	EF1D_PIMBR Elongation factor 1-delta OS=Pimpinella brachycarpa PE=2 SV=3	---	25.745	44.7	123	13	5	1223600	1175400	1062000	1026800	949730	942210	1032200	1108700	1051500	1475200	1408000	1390200	1234000	1177700	1160800	1347900	1271300	1178800	1544400	1489500	1411600	1357800	1410300	1363800
Capana01g002878	CGEP_ORYSJ Probable glutamyl endopeptidase, chloroplastic OS=Oryza sativa subsp. japonica GN=GEP PE=2 SV=1	GEP	22.523	55.9	157	8	8	772250	740800	710470	680160	691670	642830	773560	761350	766570	652850	634450	679070	638140	509950	553270	571320	530410	540280	520050	508870	578480	431110	407890	405740
Capana01g002883	PRX2B_ARATH Peroxiredoxin-2B OS=Arabidopsis thaliana GN=PRXIIB PE=1 SV=1	PRXIIB	17.406	63	211	7	7	1306400	1700700	1745700	1668100	1832600	2092300	2126100	2204800	2069100	2765800	2829500	2767900	1777200	1958500	2198400	1623100	1982600	2008100	2014500	2277900	2157600	3739500	3251500	3435500
Capana01g002891	CP12_CHLRE Calvin cycle protein CP12 OS=Chlamydomonas reinhardtii GN=cp12 PE=1 SV=1	cp12	13.196	54.5	158	7	6	2476500	2185800	2306800	2052100	2073300	2080600	2480000	2397900	2542600	2808900	2723300	2767200	2342700	2389800	2429300	2221200	2522400	2358400	2430400	2494200	2494000	1941500	1883000	1912700
Capana01g002901	P2C70_ARATH Protein phosphatase 2C 70 OS=Arabidopsis thaliana GN=KAPP PE=1 SV=2	KAPP	37.935	4.7	2	1	1	0	0	0	0	0	0	0	0	0	0	0	0	0	0	0	0	0	0	0	0	0	0	7474.8	0
Capana01g002904	RAGP2_ARATH RAN GTPase-activating protein 2 OS=Arabidopsis thaliana GN=RANGAP2 PE=1 SV=2	RANGAP2	57.158	42.8	94	12	12	108880	120570	133650	148430	132270	151710	229520	193750	225370	86864	86440	107250	204300	205130	200510	275300	289030	292400	426380	442260	434690	122270	121700	105840
Capana01g002908	PYRG_DICDI CTP synthase OS=Dictyostelium discoideum GN=ctps PE=3 SV=1	ctps	61.826	8	28	3	3	28213	46244	0	55412	63092	58270	0	48360	38290	57800	43776	43597	43364	54323	0	51695	48453	59468	43635	33629	47449	47338	43838	53866
Capana01g002916	TM205_XENLA Transmembrane protein 205 OS=Xenopus laevis GN=tmem205 PE=2 SV=1	tmem205	23.593	9.9	31	2	2	41800	0	24630	26660	32347	219370	27439	161700	0	177780	101450	36724	132320	45989	43508	119260	115010	180700	0	0	97287	277790	258810	239790
Capana01g002925	ACY1_PONAB Aminoacylase-1 OS=Pongo abelii GN=ACY1 PE=2 SV=2	ACY1	30.132	8.2	0	1	1	0	0	0	0	0	0	0	0	0	0	0	0	0	0	0	0	0	0	0	0	0	0	0	0
Capana01g002926	BXL2_ARATH Probable beta-D-xylosidase 2 OS=Arabidopsis thaliana GN=BXL2 PE=2 SV=1	BXL2	49.823	16.6	52	5	5	184330	165250	178750	275540	231830	228480	171720	163310	157900	157590	146270	153370	178990	166230	173800	179720	172770	169430	145240	149710	124030	125840	140550	135830
Capana01g002928	SAR1A_ARATH GTP-binding protein SAR1A OS=Arabidopsis thaliana GN=SAR1A PE=2 SV=1	SAR1A	21.89	68.4	247	10	3	2478800	2328200	2257000	2573300	2524300	2537200	1848800	1826100	1911800	1881400	1880000	1880700	2257900	2298200	2243000	2217400	2132200	2080200	1796800	1726300	1738300	3144800	3166000	3188100
Capana01g002930	ANT1_YEAST Peroxisomal adenine nucleotide transporter 1 OS=Saccharomyces cerevisiae (strain ATCC 204508 / S288c) GN=ANT1 PE=1 SV=1	ANT1	35.423	10	39	2	2	64524	67325	65144	0	54864	72595	48535	73237	64847	62145	54631	31278	71127	67049	58664	58522	59731	68300	62482	61666	60669	31461	0	0
Capana01g002934	GLGL3_SOLTU Glucose-1-phosphate adenylyltransferase large subunit 3, chloroplastic/amyloplastic OS=Solanum tuberosum GN=AGPS3 PE=2 SV=1	AGPS3	56.627	70.2	798	28	27	8093300	8650000	8862500	8733100	8814500	8832100	9902400	10088000	10310000	9377900	9480400	9404700	9027800	9126900	9328100	8760300	8736500	9023700	7875200	7703100	7954600	9456400	8977300	8847100
Capana01g002939	PRX2F_ARATH Peroxiredoxin-2F, mitochondrial OS=Arabidopsis thaliana GN=PRXIIF PE=1 SV=2	PRXIIF	20.783	62.3	134	8	8	375650	277930	281810	292540	291440	202860	342170	320110	359840	446170	523470	492150	259020	297460	343440	355100	360260	364020	328500	422770	447070	673160	719820	795880
Capana01g002948	7SB1_SOYBN Basic 7S globulin OS=Glycine max GN=BG PE=1 SV=2	BG	46.874	33.6	100	8	8	181480	203260	205170	239880	256750	261120	124820	135650	129500	298730	301390	280420	171850	179510	181060	142410	148910	136720	108590	117220	108960	349010	321690	329170
Capana01g002957	7SB1_SOYBN Basic 7S globulin OS=Glycine max GN=BG PE=1 SV=2	BG	47.097	42.2	146	11	10	437980	431890	396520	438330	429570	416950	401350	405240	383250	536510	532670	551230	451610	467830	449220	359870	408810	421910	428610	408620	389310	880490	903390	900010
Capana01g002960	7SB1_SOYBN Basic 7S globulin OS=Glycine max GN=BG PE=1 SV=2	BG	36.427	19.1	29	4	4	56931	71578	50671	91941	80414	83037	0	0	36317	81299	91764	96353	58702	66130	56103	39120	36710	43586	41188	36116	0	77962	105240	102110
Capana01g002966	TSJT1_TOBAC Stem-specific protein TSJT1 OS=Nicotiana tabacum GN=TSJT1 PE=2 SV=1	TSJT1	25.035	24.6	16	3	3	76869	79667	82839	77155	84218	107940	0	79595	0	46609	0	0	140630	52857	142240	0	94699	102950	82390	86234	79972	81076	0	0
Capana01g002969	UBA3_ARATH NEDD8-activating enzyme E1 catalytic subunit OS=Arabidopsis thaliana GN=ECR1 PE=1 SV=2	ECR1	49.033	39	160	11	11	299670	275510	266360	299760	290610	293250	227490	218270	221710	218680	220680	202430	300080	288800	290410	294210	267240	269850	225730	220770	221220	308040	316150	323620
Capana01g002971	NNRD_VITVI ATP-dependent (S)-NAD(P)H-hydrate dehydratase OS=Vitis vinifera GN=VIT_05s0020g02800 PE=3 SV=1	VIT_05s0020g02800	20.122	31.4	35	3	2	65882	69540	86184	74062	71862	0	75152	73045	76651	61840	60171	64082	0	70556	93422	77618	75487	66277	86352	52175	53042	82220	0	0
Capana01g002972	NNRD_VITVI ATP-dependent (S)-NAD(P)H-hydrate dehydratase OS=Vitis vinifera GN=VIT_05s0020g02800 PE=3 SV=1	VIT_05s0020g02800	17.944	19.4	29	2	2	118500	0	115790	89445	83288	81555	79830	98567	91632	59135	76003	108430	91870	0	101580	78318	0	88021	0	80600	67294	74401	98174	80810
Capana01g002996	YKM6_SCHPO UPF0613 protein PB24D3.06c OS=Schizosaccharomyces pombe (strain 972 / ATCC 24843) GN=SPAPB24D3.06c PE=2 SV=1	SPAPB24D3.06c	37.343	31.5	109	6	6	144270	141920	144210	140110	138680	142680	141880	156700	152720	154400	151750	156760	143610	137210	143640	156590	153350	148960	161430	155050	152320	113830	134400	135930
Capana01g003003	MPK16_ARATH Mitogen-activated protein kinase 16 OS=Arabidopsis thaliana GN=MPK16 PE=2 SV=2	MPK16	66.421	8	9	3	2	0	0	0	0	0	0	0	0	0	0	0	0	0	9112	0	0	0	0	0	0	0	0	0	0
Capana01g003021	Y4424_ARATH DUF21 domain-containing protein At4g14240 OS=Arabidopsis thaliana GN=CBSDUF1 PE=2 SV=1	CBSDUF1	32.74	29.7	47	6	4	42773	41931	55206	46942	52433	56610	55298	84290	64510	46704	50481	47489	55826	51712	48365	49308	59573	56911	58325	55967	55666	49254	53759	47428
Capana01g003026	HMGCL_ARATH Hydroxymethylglutaryl-CoA lyase, mitochondrial OS=Arabidopsis thaliana GN=HMGCL PE=1 SV=2	HMGCL	37.357	21	56	5	5	3695100	3768700	3427600	4170500	4184300	4529500	4174700	3821800	3923800	3215600	4323600	1876400	4549300	4170500	4228300	4036200	4159600	5123400	3766000	3213000	3714200	2634000	4307700	340830
Capana01g003035	Tyrosine-protein phosphatase cdc-14	---	22.682	50.7	157	8	8	719060	811240	780510	791390	771320	802100	1089200	1044600	1068200	1072700	1030700	1029900	807680	828670	820640	812250	841830	870460	920210	924500	891390	1277100	1223600	1219900
Capana01g003039	CBSX3_ARATH CBS domain-containing protein CBSX3, mitochondrial OS=Arabidopsis thaliana GN=CBSX3 PE=1 SV=1	CBSX3	22.532	50	226	8	8	1253700	1316600	1348200	1473000	1394900	1424000	1473800	1496500	1362900	1964100	1917700	1978300	1481400	1545600	1504300	1584300	1611500	1568000	1615700	1629600	1729000	2491800	2443100	2412500
Capana01g003040	UCHL5_HUMAN Ubiquitin carboxyl-terminal hydrolase isozyme L5 OS=Homo sapiens GN=UCHL5 PE=1 SV=3	UCHL5	35.831	15.1	28	3	3	178760	128690	100210	138000	0	58718	241640	214370	103670	0	57462	123640	82261	0	107740	170560	56099	197650	40103	99421	0	0	0	0
Capana01g003044	GLYR1_AEDAE Putative oxidoreductase GLYR1 homolog OS=Aedes aegypti GN=AAEL006684 PE=3 SV=1	AAEL006684	13.169	60.5	121	4	4	703690	714170	736410	684210	745200	749700	822310	816060	834290	935760	887740	872440	1059900	1060000	1081300	1009000	1086500	1056400	1116500	1131800	1012600	1241800	1228400	1240000
Capana01g003045	GLYR1_BOVIN Putative oxidoreductase GLYR1 OS=Bos taurus GN=GLYR1 PE=2 SV=1	GLYR1	16.814	67.9	217	8	8	887290	830030	786180	868580	805740	809420	798450	841400	902350	817500	833280	803970	975180	946230	941680	975490	992500	1055700	1028000	1052400	1006700	1097500	1108400	1047400
Capana01g003049	GLNA2_DAUCA Glutamine synthetase, chloroplastic OS=Daucus carota GN=GLN2 PE=2 SV=1	GLN2	47.613	68.3	1272	24	23	14726000	15758000	15143000	15065000	15191000	15831000	18698000	19256000	19310000	17466000	17176000	16099000	18979000	18649000	18716000	18186000	17920000	19432000	17914000	17833000	17857000	20354000	19630000	20672000
Capana01g003059	MO25N_ARATH Putative MO25-like protein At5g47540 OS=Arabidopsis thaliana GN=At5g47540 PE=2 SV=1	At5g47540	39.204	7.9	11	2	2	59286	60737	53006	55253	52272	57582	58728	52213	58330	51650	58289	47908	0	0	0	0	0	0	0	0	0	0	0	0
Capana01g003062	MUDEN_BOVIN MHD domain-containing death-inducing protein OS=Bos taurus GN=MUDENG PE=2 SV=1	MUDENG	81.862	4.2	2	2	2	0	0	21776	0	0	0	0	0	0	0	0	0	0	0	0	0	0	0	0	0	0	0	0	0
Capana01g003067	PPDK_MESCR Pyruvate, phosphate dikinase, chloroplastic OS=Mesembryanthemum crystallinum GN=PPD PE=2 SV=1	PPD	100.6	34.9	253	23	22	700090	683230	660340	531550	527690	536290	1122000	1152600	1115600	721730	713820	735660	804060	753090	782120	1129800	1093200	1090000	1208000	1187700	1164800	605590	589150	591960
Capana01g003068	AB4C_ARATH ABC transporter C family member 4 OS=Arabidopsis thaliana GN=ABCC4 PE=1 SV=2	ABCC4	151.67	19.1	132	18	17	407210	444740	439470	347460	343680	366190	510560	487170	498440	363770	358200	359480	417650	409710	373850	431990	438900	481430	437670	476540	507540	186120	202930	212570
Capana01g003096	SYI_NOSP7 Isoleucine--tRNA ligase OS=Nostoc punctiforme (strain ATCC 29133 / PCC 73102) GN=ileS PE=3 SV=1	ileS	116.91	40.3	485	26	26	1468100	1452700	1438000	1316400	1301400	1297800	1865900	1843900	1808400	1250000	1277000	1232500	1214900	1226400	1195900	1485000	1454600	1407900	1446800	1417600	1480900	402710	440720	414860
Capana01g003099	XT1_ARATH Xyloglucan 6-xylosyltransferase OS=Arabidopsis thaliana GN=XT1 PE=1 SV=1	XT1	53.312	14.1	36	4	4	61527	57697	55756	59981	54347	47804	36958	28487	28229	48124	0	0	47492	44587	47497	51431	37083	41782	0	25538	28077	28885	44691	36191
Capana01g003103	Putative NAD(P)-binding Rossmann-fold superfamily protein-like	---	37.156	47.6	186	10	10	590800	675480	655070	763520	725820	765430	791380	745040	758910	678560	655780	634670	723530	710370	713580	655830	703560	776750	625970	703780	625990	728390	711000	747540
Capana01g003107	BAM9_ARATH Inactive beta-amylase 9 OS=Arabidopsis thaliana GN=BAM9 PE=2 SV=1	BAM9	58.678	3.7	8	1	1	0	0	0	0	0	0	0	0	0	0	0	0	0	0	0	0	0	0	0	0	0	0	0	11915
Capana01g003109	NHX2_ARATH Sodium/hydrogen exchanger 2 OS=Arabidopsis thaliana GN=NHX2 PE=1 SV=2	NHX2	56.256	5.3	27	2	2	29719	23422	29398	23425	25040	28891	18334	19372	18803	18079	19211	0	23414	23256	33273	26644	21780	19359	20477	0	24644	0	23314	19599
Capana01g003112	ACP1_CASGL Acyl carrier protein 1, chloroplastic OS=Casuarina glauca GN=ACP1 PE=2 SV=1	ACP1	14.014	12.1	5	2	2	0	0	0	0	0	0	0	0	0	0	0	0	0	0	0	0	0	0	0	0	0	0	0	20035
Capana01g003113	SODC_CAPAN Superoxide dismutase [Cu-Zn] OS=Capsicum annuum GN=SODCC PE=2 SV=1	SODCC	15.442	38.8	75	3	3	808210	862680	737480	1461200	1592400	1129000	329310	322060	299240	1106300	1412600	1072200	262360	272310	315490	256280	166170	200730	379580	260450	372600	666370	703970	705850
Capana01g003114	DHQSD_ARATH Bifunctional 3-dehydroquinate dehydratase/shikimate dehydrogenase, chloroplastic OS=Arabidopsis thaliana GN=EMB3004 PE=1 SV=1	EMB3004	56.122	37.2	166	13	13	512570	501090	451700	542290	510150	516160	416120	446860	459200	503910	476990	481170	518710	484840	475810	468540	472650	445620	416340	424680	436180	700130	774200	660320
Capana01g003121	CALS2_ARATH Callose synthase 2 OS=Arabidopsis thaliana GN=CALS2 PE=2 SV=3	CALS2	225.06	3.1	28	3	3	271400	200450	221080	208040	184340	160040	215580	210500	242840	0	0	0	188220	229130	205830	204610	198260	221560	211170	191440	179360	0	0	0
Capana01g003141	PBS1_ARATH Serine/threonine-protein kinase PBS1 OS=Arabidopsis thaliana GN=PBS1 PE=1 SV=1	PBS1	56.258	2.5	9	1	1	0	0	0	0	0	0	0	0	0	0	0	0	0	0	0	0	0	0	0	0	0	0	0	4136.4
Capana01g003145	OBG_HERA2 GTPase obg OS=Herpetosiphon aurantiacus (strain ATCC 23779 / DSM 785) GN=obg PE=3 SV=1	obg	75.044	15.2	51	7	7	87790	91558	69481	79682	70739	73138	86101	69138	70858	53014	59026	53744	63685	78007	70272	94359	81698	83975	114350	101200	109180	26580	0	41387
Capana01g003154	SNF4_ARATH Sucrose nonfermenting 4-like protein OS=Arabidopsis thaliana GN=SNF4 PE=1 SV=1	SNF4	52.846	18.9	60	5	5	166100	140020	142770	153450	135330	126220	78649	75256	106080	97599	51434	121950	122680	152760	122050	122190	102550	106970	110320	92121	70185	139860	155740	147450
Capana01g003169	divinyl chlorophyllide a 8-vinyl-reductase, chloroplastic	---	46.129	33.1	136	10	10	480960	504560	561050	567590	584330	581040	702030	650310	631410	510740	541600	534270	510480	508420	514270	450710	491350	511300	463600	481320	445710	368760	383600	366090
Capana01g003171	CUL1_ARATH Cullin-1 OS=Arabidopsis thaliana GN=CUL1 PE=1 SV=1	CUL1	86.436	9.3	10	6	3	0	0	0	0	0	0	40439	0	0	0	0	0	0	0	0	0	47952	0	0	0	0	0	0	0
Capana01g003173	Putative ovule protein (Fragment)	---	20.034	17.6	21	2	2	0	0	0	0	0	0	0	0	0	0	0	0	40798	42492	0	53916	45943	0	60595	0	0	0	0	0
Capana01g003192	Processive diacylglycerol beta-glucosyltransferase	---	16.735	22.7	44	2	2	92988	91390	90370	88311	93688	0	97048	93929	106230	144270	124550	129900	93497	89549	116720	80646	83374	68289	90246	91222	99940	133290	135430	138950
Capana01g003202	CAP-Gly domain-containing linker protein 1 isoform X2	---	18.072	21.7	20	2	2	0	0	0	14909	30201	0	0	0	0	0	13520	0	0	0	0	37812	18135	20869	0	0	0	0	0	0
Capana01g003214	CYB6_DRIGR Cytochrome b6 OS=Drimys granadensis GN=petB PE=3 SV=1	petB	18.123	35.2	104	3	3	1758300	2374300	1799200	1958900	2234000	1897000	2524500	2317500	2309800	1792500	1559900	1628900	1730000	2216600	2127000	2664900	2544700	2402300	2372600	2392100	2456500	2727300	3498800	3303900
Capana01g003217	RK2_SOLTU 50S ribosomal protein L2, chloroplastic OS=Solanum tuberosum GN=rpl2-A PE=3 SV=1	rpl2-A	14.991	31.6	86	4	4	881320	1103300	1220100	1169700	1203800	1179000	1425900	1337500	1349500	912620	964270	928680	1248600	1247700	1305800	1159100	1334900	1349200	1263400	1268300	1202200	535030	561070	540900
Capana01g003219	NDHK_ATRBE NAD(P)H-quinone oxidoreductase subunit K, chloroplastic OS=Atropa belladonna GN=ndhK PE=3 SV=2	ndhK	25.55	17.3	14	4	2	66373	0	62451	72621	67713	72994	64466	0	75230	42488	0	39758	0	69587	68879	61226	63585	58812	53179	46248	57624	78589	73584	71214
Capana01g003224	CISY_DAUCA Citrate synthase, mitochondrial OS=Daucus carota GN=CS PE=2 SV=1	CS	46.505	57.2	242	15	15	998780	1157000	1279400	1381500	1413900	1433600	1268400	1236300	1193700	1157300	1141200	1196500	1544200	1491600	1532400	1322300	1388700	1425800	1210700	1132900	1184200	1886200	1838500	1874500
Capana01g003225	PGMC_SOLTU Phosphoglucomutase, cytoplasmic OS=Solanum tuberosum GN=PGM1 PE=2 SV=1	PGM1	63.522	73.2	609	29	14	5363000	5407400	5450000	5451500	5398400	5588400	5806900	5763200	5826300	5201600	5087800	5049400	5698600	5473200	5681900	5030400	5165100	5273600	5405700	5432500	5556800	5305800	5123800	5104500
Capana01g003232	VATD_ARATH V-type proton ATPase subunit D OS=Arabidopsis thaliana GN=VHA-D PE=1 SV=2	VHA-D	29.098	34.1	114	8	3	358660	356330	344710	327680	299460	331650	384560	335570	351370	387130	374690	352530	363310	365770	350340	337450	350960	326330	314500	321150	324330	238440	255520	206020
Capana01g003239	PP2A5_TOBAC Serine/threonine-protein phosphatase PP2A-5 catalytic subunit OS=Nicotiana tabacum GN=NPP5 PE=2 SV=1	NPP5	34.694	55.9	193	11	6	902740	810240	749120	913750	873830	788320	628840	691470	679770	555740	524900	583880	818500	804830	838120	795790	803290	803170	615830	688940	625890	787270	856830	858180
Capana01g003244	HEX1_CANAX Beta-hexosaminidase OS=Candida albicans GN=HEX1 PE=1 SV=1	HEX1	63.945	21.3	115	9	9	169160	156050	160060	158860	160950	166940	152580	159210	150730	170390	167950	171040	194740	187310	183580	184970	172760	186330	148400	164110	143240	163620	171900	176540
Capana01g003248	Outer capsid glycoprotein VP7	---	45.365	11.7	57	3	3	365150	399070	231820	436810	399570	398680	288000	298440	328370	380750	440430	372960	473700	336890	332820	334700	275310	269950	249610	232520	246870	516760	461200	491150
Capana01g003259	RS16_FRIAG 40S ribosomal protein S16 OS=Fritillaria agrestis GN=RPS16 PE=2 SV=1	RPS16	17.056	35.3	78	4	4	2293800	2032500	2114900	2194200	2240200	2250400	1601400	1567100	1662000	1604400	1618900	1682800	2145500	2188700	2413500	2009800	1991900	1949000	1698200	1667600	1697100	1556300	1712100	1730600
Capana01g003270	UGPA_MUSAC UTP--glucose-1-phosphate uridylyltransferase OS=Musa acuminata GN=UGPA PE=2 SV=1	UGPA	72.747	12	26	5	5	43538	48381	30598	52200	47889	50143	38757	34155	24342	37145	32301	0	60196	21417	39906	60100	41836	35505	37783	35121	36226	0	30788	38784
Capana01g003271	YKWC_BACSU Uncharacterized oxidoreductase ykwC OS=Bacillus subtilis GN=ykwC PE=3 SV=1	ykwC	31.949	44.7	118	8	8	291400	313070	313440	319240	323780	327300	308390	305250	312840	312240	302470	320710	324350	320850	318770	342540	339500	333670	307440	314910	313590	406270	409970	437900
Capana01g003284	MEM11_ARATH Membrin-11 OS=Arabidopsis thaliana GN=MEMB11 PE=1 SV=1	MEMB11	28.699	11.6	7	2	2	16607	19168	0	16540	15568	0	12237	0	0	0	0	0	0	0	12568	0	0	0	0	0	0	0	0	0
Capana01g003292	GST23_MAIZE Glutathione transferase GST 23 OS=Zea mays PE=2 SV=1	---	25.64	34.2	128	7	7	993510	960070	998230	857250	896610	872980	923840	946260	1022000	783230	817310	813010	1477800	1342100	1400700	1496100	1485000	1449200	1204400	1263100	1196600	772730	788680	789540
Capana01g003293	PUR7_ARATH Phosphoribosylaminoimidazole-succinocarboxamide synthase, chloroplastic OS=Arabidopsis thaliana GN=PUR7 PE=2 SV=2	PUR7	27.689	35	23	5	5	116080	48716	40561	44227	47628	42922	37331	42716	40954	24020	36148	43369	50697	48555	68846	61087	53997	86411	48557	63585	43601	0	48507	57523
Capana01g003296	GST23_MAIZE Glutathione transferase GST 23 OS=Zea mays PE=2 SV=1	---	25.914	52.7	163	11	11	571370	644770	593190	618880	568730	579060	549130	558030	530120	619040	610980	638910	465260	467300	487660	418450	382550	398110	410140	409370	419670	514330	486190	502740
Capana01g003299	SKI25_ARATH F-box/kelch-repeat protein SKIP25 OS=Arabidopsis thaliana GN=SKIP25 PE=1 SV=1	SKIP25	46.609	4.1	5	1	1	0	0	0	0	0	0	0	0	0	0	0	0	0	0	0	1855.8	0	0	0	0	0	0	0	0
Capana01g003307	SEC23_MAGO7 Protein transport protein SEC23 OS=Magnaporthe oryzae (strain 70-15 / ATCC MYA-4617 / FGSC 8958) GN=SEC23 PE=3 SV=1	SEC23	67.896	23.7	86	9	8	282950	253770	241830	260990	248810	273570	205280	214610	212260	172620	171290	171410	226630	232430	233820	229660	230020	213800	184760	179490	166160	183300	200500	213680
Capana01g003308	SEC23_COCIM Protein transport protein SEC23 OS=Coccidioides immitis (strain RS) GN=SEC23 PE=3 SV=1	SEC23	18.317	43.8	53	4	4	132630	138140	134250	144620	136500	134510	119590	114620	116210	96014	89350	94058	127120	122560	127500	135520	120180	111800	104900	105330	108430	118400	115960	131180
Capana01g003318	SCAI_MOUSE Protein SCAI OS=Mus musculus GN=Scai PE=1 SV=2	Scai	69.149	9.1	18	3	3	0	178000	0	0	169020	0	0	0	137170	0	0	0	174570	0	0	0	0	158110	0	174830	138980	0	0	0
Capana01g003323	arp2/3 complex-activating protein rickA	---	38.701	58.7	312	14	14	3302400	3351300	3229900	3215100	3182500	3217700	3324700	3390800	3406800	4154800	4269700	4248800	3324000	3104300	3254300	3184000	3221200	3124200	3622900	3704500	3662700	4141500	4267900	4101200
Capana01g003345	WAX2_ARATH Protein WAX2 OS=Arabidopsis thaliana GN=WAX2 PE=1 SV=1	WAX2	72.924	7.7	25	4	3	60885	0	54729	63308	62803	90376	0	0	0	0	0	67671	75472	75001	65842	87815	83383	91566	81129	80947	82408	71366	145590	111360
Capana01g003349	EIF3B_TOBAC Eukaryotic translation initiation factor 3 subunit B OS=Nicotiana tabacum GN=TIF3B1 PE=2 SV=1	TIF3B1	83.014	40.4	314	24	24	1076200	1059100	1021400	919030	926470	972450	1257500	1246200	1235500	1300700	1205400	1199600	861120	841600	835360	1016300	1001800	995830	1280400	1256600	1267800	402520	366840	350640
Capana01g003356	Y4523_ARATH Probable serine/threonine-protein kinase At4g35230 OS=Arabidopsis thaliana GN=At4g35230 PE=1 SV=1	At4g35230	56.815	10.9	20	4	4	33355	34862	37315	38303	33992	39322	42341	39544	38087	35309	32380	33299	37426	28272	32913	27915	30905	30435	32461	32000	0	0	0	20269
Capana01g003358	Putative ovule protein	---	12.577	48.2	51	4	4	105010	107210	118230	98074	131410	111780	85780	113300	132640	161650	156300	162120	123110	115130	136550	101450	137870	115850	159590	143550	117320	115510	106180	119950
Capana01g003369	Putative polyadenylate-binding protein 1-B-binding protein-like	---	37.03	11.1	24	2	2	72514	62576	50441	37056	79980	68625	17925	0	26985	31551	0	20094	39530	37740	63466	35406	57966	74651	0	36724	34501	99072	104810	47612
Capana01g003371	HIBC1_ARATH 3-hydroxyisobutyryl-CoA hydrolase 1 OS=Arabidopsis thaliana GN=CHY1 PE=1 SV=1	CHY1	42.479	51.4	208	13	12	500930	487410	476990	445900	423300	460330	417930	438470	422460	421600	410660	419500	534470	536730	543640	593960	520310	538370	455800	471330	450390	374970	391250	398770
Capana01g003372	TTHL_ARATH Uric acid degradation bifunctional protein TTL OS=Arabidopsis thaliana GN=TTL PE=1 SV=1	TTL	37.211	17	53	4	4	46701	58594	63202	70325	61148	62417	58547	55468	57786	63153	58687	59567	68830	65285	65250	63172	68192	54331	55959	56579	44487	88900	86201	83053
Capana01g003379	RL18_AROAE 50S ribosomal protein L18 OS=Aromatoleum aromaticum (strain EbN1) GN=rplR PE=3 SV=1	rplR	20.855	15.6	6	3	3	0	47418	36152	40849	72715	0	0	0	0	0	0	31690	0	34391	0	0	0	0	0	0	0	43715	0	0
Capana01g003380	UMPK_ARATH UMP/CMP kinase OS=Arabidopsis thaliana GN=PYR6 PE=1 SV=1	PYR6	22.892	50.2	98	9	8	444880	384560	482540	459270	471830	485750	379020	384790	347920	575060	587500	525390	446650	518570	479640	389550	453710	534530	553340	547400	552680	710070	699470	603990
Capana01g003385	DRP1E_ARATH Dynamin-related protein 1E OS=Arabidopsis thaliana GN=DRP1E PE=1 SV=1	DRP1E	68.754	48.4	295	19	16	1030500	985970	991140	1044700	1023800	1063400	831540	839850	851360	865380	836370	815470	925540	975820	938850	870500	889400	931590	855010	874210	825310	991800	1009300	1061500
Capana01g003391	RAH1B_ARATH Ras-related protein RABH1b OS=Arabidopsis thaliana GN=RABH1B PE=1 SV=1	RABH1B	23.071	45.7	99	8	5	718480	797590	823960	973800	951930	1011000	753270	847770	651320	817930	813050	817060	1020000	963280	1012600	706530	840820	859390	526200	534840	631230	1746500	1633200	1521600
Capana01g003392	ACPM1_ARATH Acyl carrier protein 1, mitochondrial OS=Arabidopsis thaliana GN=MTACP1 PE=2 SV=1	MTACP1	21.724	28.9	34	3	3	458850	364760	421280	387170	361330	366660	389220	361700	362440	449480	488280	400470	368660	358740	332850	398150	325990	424770	458270	404350	418520	523350	506860	458990
Capana01g003394	protein TRIGALACTOSYLDIACYLGLYCEROL 4, chloroplastic	---	51.359	50.2	233	13	13	663880	754300	726510	865030	822410	833560	671360	664060	672880	537450	576080	579380	716150	708510	718060	738550	724960	779160	579140	565450	588300	942670	929280	904080
Capana01g003395	CH10C_ARATH 20 kDa chaperonin, chloroplastic OS=Arabidopsis thaliana GN=CPN21 PE=1 SV=2	CPN21	14.909	34.1	40	4	4	82785	70932	75636	75844	75768	74411	90761	102730	102820	155960	157990	151230	0	137410	150080	0	139020	138230	183660	194040	188010	195120	192640	0
Capana01g003406	Y5707_ARATH Probable receptor-like protein kinase At5g47070 OS=Arabidopsis thaliana GN=At5g47070 PE=1 SV=1	At5g47070	46.417	1.9	0	1	1	0	0	0	0	0	0	0	0	0	0	0	0	0	0	0	0	0	0	0	0	0	0	0	0
Capana01g003407	IF4G1_ARATH Eukaryotic translation initiation factor 4G OS=Arabidopsis thaliana GN=EIF4G PE=1 SV=2	EIF4G	53.185	20.4	28	7	4	51172	0	24881	0	56830	74876	57032	54368	59149	55428	0	61524	58426	22068	53389	0	63127	57714	74082	84645	75799	0	43510	80045
Capana01g003409	IF4G1_ARATH Eukaryotic translation initiation factor 4G OS=Arabidopsis thaliana GN=EIF4G PE=1 SV=2	EIF4G	173.81	21.9	171	19	16	369780	378800	350540	341120	342800	294610	286260	255130	276390	314430	292850	304080	320820	339380	326300	372220	335320	335570	341880	362920	326260	245360	267720	279090
Capana01g003411	MCA1_ARATH Metacaspase-1 OS=Arabidopsis thaliana GN=AMC1 PE=1 SV=1	AMC1	39.645	15	14	3	3	0	35380	31201	27620	0	0	0	36049	13655	0	0	0	47575	33825	24664	52122	0	25012	0	21222	16302	0	0	40846
Capana01g003414	DJC17_MOUSE DnaJ homolog subfamily C member 17 OS=Mus musculus GN=Dnajc17 PE=2 SV=1	Dnajc17	32.533	12.2	13	2	2	0	0	0	0	0	0	0	0	0	0	19706	14399	0	23160	0	0	0	36766	0	22935	0	0	0	0
Capana01g003416	LEA_2 domain-containing protein	---	23.21	16.1	3	2	2	0	0	0	0	0	0	0	0	0	0	0	0	0	0	0	14573	0	0	0	0	0	0	0	0
Capana01g003417	GANAB_DICDI Neutral alpha-glucosidase AB OS=Dictyostelium discoideum GN=modA PE=3 SV=1	modA	105.49	21.8	167	15	15	636270	618670	612730	589650	619320	583980	491090	519430	522100	609690	614950	628530	570920	578700	539150	548320	503580	538160	501370	498090	520620	331240	354450	355060
Capana01g003424	HNRPQ_RAT Heterogeneous nuclear ribonucleoprotein Q OS=Rattus norvegicus GN=Syncrip PE=2 SV=1	Syncrip	88.316	19.1	77	10	8	162260	140480	138330	152610	148870	147140	149340	150120	152360	106520	101600	93934	136480	135560	135660	175230	163160	143200	174040	153140	164430	158420	157970	171000
Capana01g003442	NDK_CAPAN Nucleoside diphosphate kinase OS=Capsicum annuum PE=2 SV=1	---	16.296	64.2	193	8	8	3815500	4112200	4446800	4418800	4951500	4718200	4802000	4515200	4918100	6115500	6314400	6221900	5361300	4960600	5101200	4342700	4861100	4310300	4882600	5092600	5128800	8968300	8971500	8559000
Capana01g003447	MDHC_MAIZE Malate dehydrogenase, cytoplasmic OS=Zea mays PE=2 SV=2	---	35.452	50.9	144	10	7	412480	406600	385070	398670	371720	374970	486030	480040	485310	423190	438320	408030	355690	353320	341650	398940	393840	373190	373180	358160	364380	426200	435990	463530
Capana01g003448	HIBC4_ARATH 3-hydroxyisobutyryl-CoA hydrolase-like protein 1, mitochondrial OS=Arabidopsis thaliana GN=At3g60510 PE=2 SV=1	At3g60510	44.115	22.6	54	6	6	111690	114180	113800	119840	129400	130280	156010	135130	148630	119420	89326	104220	111490	106140	115720	110650	114490	106800	96633	108310	94957	48747	75862	55409
Capana01g003452	EFGM_ARATH Elongation factor G, mitochondrial OS=Arabidopsis thaliana GN=At1g45332 PE=1 SV=1	At1g45332	85.174	9.4	68	4	4	143430	121680	116640	123560	108570	105830	96407	103030	88582	110520	89914	100850	99253	120380	128170	125630	115520	117450	125900	122590	118380	82097	110780	90142
Capana01g003454	NUP62_RAT Nuclear pore glycoprotein p62 OS=Rattus norvegicus GN=Nup62 PE=1 SV=1	Nup62	28.132	20.6	58	4	4	126910	132210	133240	119970	111730	86527	116820	108360	121530	146320	152000	154150	113120	113610	116890	96985	58252	102160	121860	127160	126080	158990	141780	151930
Capana01g003478	PCBP4_BOVIN Poly(rC)-binding protein 4 OS=Bos taurus GN=PCBP4 PE=2 SV=1	PCBP4	38.451	16.9	39	3	3	85315	78268	69560	71539	65250	67831	44543	53927	46773	55267	45205	46688	47922	54830	0	57735	50573	50095	62462	55227	67169	39608	42946	36497
Capana01g003486	R1A4_SOLDE Putative late blight resistance protein homolog R1A-4 OS=Solanum demissum GN=R1A-4 PE=5 SV=2	R1A-4	93.435	19.1	99	10	10	149750	131880	142610	112110	118410	113490	190900	174720	182130	121600	119590	124020	118740	130590	118500	165370	159350	156290	211640	206130	210070	0	0	0
Capana01g003488	PPT1_CAEEL Palmitoyl-protein thioesterase 1 OS=Caenorhabditis elegans GN=ppt-1 PE=2 SV=2	ppt-1	23.108	20.2	13	3	3	0	0	109460	165320	92340	0	0	0	77031	0	0	0	0	0	0	169530	0	167760	138390	141680	0	255840	0	188510
Capana01g003490	Putative UPF0565 protein C2orf69-like	---	28.685	6.4	9	1	1	0	0	0	0	0	0	0	0	0	0	0	0	0	0	0	0	0	0	0	0	0	0	0	3037.8
Capana01g003509	CSN7_ARATH COP9 signalosome complex subunit 7 OS=Arabidopsis thaliana GN=CSN7 PE=1 SV=1	CSN7	29.632	19.7	56	4	4	100780	92202	100330	136890	135420	120680	120250	72791	96947	144130	128830	158340	101530	117550	111100	126470	106870	116060	168610	117120	118450	170900	154910	178870
Capana01g003512	LCMT2_RAT Leucine carboxyl methyltransferase 2 OS=Rattus norvegicus GN=Lcmt2 PE=2 SV=1	Lcmt2	39.307	15.1	37	4	4	76779	78510	85017	91680	86076	91230	74514	82907	62490	68434	79150	72671	88075	79097	86858	84860	78886	82493	77968	65403	72451	63334	72531	58946
Capana01g003515	INT4_HUMAN Integrator complex subunit 4 OS=Homo sapiens GN=INTS4 PE=1 SV=2	INTS4	104.08	3.2	0	1	1	0	0	0	0	0	0	0	0	0	0	0	0	0	0	0	0	0	0	0	0	0	0	0	0
Capana01g003521	SYGM2_ARATH Glycine--tRNA ligase 2, chloroplastic/mitochondrial OS=Arabidopsis thaliana GN=GLYRS-2 PE=1 SV=1	GLYRS-2	118.78	39.4	406	31	31	1426400	1458300	1421300	1203300	1172600	1157200	1795100	1819000	1821900	1355900	1325300	1389500	989770	993460	996610	1265000	1318600	1233500	1382100	1404900	1369000	495680	450260	500890
Capana01g003522	plasminogen activator inhibitor 1 RNA-binding protein-like	---	38.899	55.8	292	16	15	1593400	1529800	1684500	1376700	1462500	1443500	1676800	1651400	1675800	2001400	2015000	1965900	1857700	1834200	1786500	1909400	1929600	2021400	2060300	2203100	2097500	1326300	1445100	1414300
Capana01g003524	RAD2A_ARATH Ras-related protein RABD2a OS=Arabidopsis thaliana GN=RABD2A PE=1 SV=3	RABD2A	28.31	32.7	32	5	3	108010	106760	78476	99804	104860	93466	53590	66532	59607	57572	66433	96389	99481	96400	93390	87056	97180	75437	68749	69549	63840	131920	158110	164890
Capana01g003544	TCPA_ARATH T-complex protein 1 subunit alpha OS=Arabidopsis thaliana GN=CCT1 PE=2 SV=1	CCT1	59.114	57.1	329	22	22	1807500	1783800	1825800	1549000	1590000	1602200	1657500	1590500	1605900	1667000	1662700	1578500	1502000	1450300	1517200	1530100	1572300	1630600	1691000	1758400	1733100	883880	831930	824680
Capana01g003546	Putative alanine--tRNA ligase-like	---	22.128	43.8	72	4	4	179300	174490	165180	166860	138090	129390	138680	158080	145720	133390	119870	139730	123210	142570	155320	190030	189400	178770	162540	147500	150580	54723	76861	96279
Capana01g003547	CNOT1_DANRE CCR4-NOT transcription complex subunit 1 OS=Danio rerio GN=cnot1 PE=2 SV=1	cnot1	259.77	13.7	159	21	21	324460	294720	274670	245140	278010	237450	217580	243700	258190	194640	181110	213830	236190	231480	213180	275120	276450	263190	283490	285960	309380	133380	122840	94400
Capana01g003555	S6PD_MALDO NADP-dependent D-sorbitol-6-phosphate dehydrogenase OS=Malus domestica GN=S6PDH PE=2 SV=1	S6PDH	34.849	42.1	351	12	12	2253200	2205700	2215100	2352200	2321800	2311200	2016100	2038100	2073900	2253900	2099200	2207700	2188300	2290900	2204500	2277500	2202900	2235500	1930700	1942800	1994600	2995000	2857000	2910000
Capana01g003563	Putative cytochrome P450-like	---	37.188	15.2	25	3	3	0	25907	25955	24020	33313	33465	30480	40403	24934	18083	22036	18039	42713	24633	31125	44231	42828	42617	57146	55951	52817	68049	67844	58788
Capana01g003564	VAP12_ARATH Vesicle-associated protein 1-2 OS=Arabidopsis thaliana GN=PVA12 PE=1 SV=1	PVA12	25.883	38.2	52	7	6	311460	324640	305840	403370	359890	362540	261450	254520	288910	275470	269690	272020	331740	331790	356510	367410	297360	317270	348910	293850	286930	427460	436030	417250
Capana01g003568	LBP65_ARATH Putative lipid-binding protein At4g00165 OS=Arabidopsis thaliana GN=At4g00165 PE=2 SV=1	At4g00165	13.731	26	29	3	3	26670	27281	23733	28423	30051	29157	35063	32772	32194	24111	22610	0	18651	25045	20330	0	0	16385	0	18741	0	0	19429	16784
Capana01g003571	RPAC1_BOVIN DNA-directed RNA polymerases I and III subunit RPAC1 OS=Bos taurus GN=POLR1C PE=2 SV=1	POLR1C	43.567	4.6	12	1	1	0	0	0	0	0	0	0	0	0	0	0	0	0	0	0	0	0	0	0	0	0	0	0	14419
Capana01g003576	VAP13_ARATH Vesicle-associated protein 1-3 OS=Arabidopsis thaliana GN=PVA13 PE=2 SV=1	PVA13	20.118	15.8	1	2	2	0	0	0	0	0	0	0	0	0	0	0	0	0	0	0	0	0	0	0	0	0	0	0	14723
Capana01g003579	GOS12_ARATH Golgi SNAP receptor complex member 1-2 OS=Arabidopsis thaliana GN=GOS12 PE=1 SV=2	GOS12	26.118	22.6	70	4	4	80542	79398	84275	88600	87813	80139	73170	69639	75153	56416	59095	57170	79709	70062	77086	87693	78561	79130	72753	69182	73381	56511	67343	72544
Capana01g003587	AMP1A_ARATH Methionine aminopeptidase 1A OS=Arabidopsis thaliana GN=MAP1A PE=2 SV=1	MAP1A	44.275	36.6	98	8	8	177020	169560	158400	192220	165580	169600	117500	113770	134950	110410	110280	107720	149360	139310	145990	217170	211960	201560	163550	164650	152890	184480	184100	185470
Capana01g003588	TBCD_HUMAN Tubulin-specific chaperone D OS=Homo sapiens GN=TBCD PE=1 SV=2	TBCD	136.48	1.2	3	1	1	0	0	0	0	0	0	0	0	0	0	0	0	0	0	0	0	0	0	0	3043.6	0	0	0	0
Capana01g003589	AMP2B_ARATH Methionine aminopeptidase 2B OS=Arabidopsis thaliana GN=MAP2B PE=2 SV=2	MAP2B	45.329	48.1	117	12	12	368850	344670	328690	330510	341780	331050	293880	305330	304700	294660	288640	309300	317350	290630	310640	297850	315320	315340	334950	309980	299980	283350	267790	286510
Capana01g003608	RPAB1_RAT DNA-directed RNA polymerases I, II, and III subunit RPABC1 OS=Rattus norvegicus GN=Polr2e PE=2 SV=1	Polr2e	24.313	15.5	11	2	2	51721	37680	0	89405	34944	56027	0	0	0	0	0	0	0	0	44409	0	0	40122	0	0	0	0	32708	0
Capana01g003613	NPC2_ASPOR Phosphatidylglycerol/phosphatidylinositol transfer protein OS=Aspergillus oryzae (strain ATCC 42149 / RIB 40) GN=pltp PE=1 SV=1	pltp	16.024	10.3	59	1	1	1168500	1276600	1230600	1507700	1367300	1469900	1465600	1263300	1382000	1915500	1857500	1593400	1473000	1439600	1499600	1324000	1357800	1340800	1408500	1386700	1249300	2345400	2283100	2203700
Capana01g003617	ROC5_NICSY 33 kDa ribonucleoprotein, chloroplastic OS=Nicotiana sylvestris PE=1 SV=1	---	63.297	14.4	66	5	4	581750	507870	477120	451730	449240	447670	577980	579810	572620	437190	466840	461200	486870	505950	505470	580850	565950	541980	707300	685280	754970	467300	483980	468150
Capana01g003619	TPPC8_HUMAN Trafficking protein particle complex subunit 8 OS=Homo sapiens GN=TRAPPC8 PE=1 SV=2	TRAPPC8	142.86	9	71	8	8	119760	106650	102490	109280	91462	94607	109780	104880	106700	81634	80656	86549	104290	113610	120010	127350	125570	117760	127950	129250	122840	51195	32386	38885
Capana01g003620	DHX36_HUMAN Probable ATP-dependent RNA helicase DHX36 OS=Homo sapiens GN=DHX36 PE=1 SV=2	DHX36	112.68	14	111	9	9	110900	109810	120330	113070	90956	86798	102080	96053	106780	71488	69278	77457	92530	104880	97365	115710	102830	120240	101630	101350	101010	27338	45339	39822
Capana01g003621	FABD_MOUSE Malonyl-CoA-acyl carrier protein transacylase, mitochondrial OS=Mus musculus GN=Mcat PE=2 SV=3	Mcat	40.693	54.7	280	16	16	3526900	3134900	3036600	3227300	3124800	3095100	2687200	2850500	2802300	3051700	3079100	3109700	2934100	3057700	2942700	3289300	3134800	2988900	2951800	3050000	2814700	3919200	4130300	4067500
Capana01g003637	DGDG1_LOTJA Digalactosyldiacylglycerol synthase 1, chloroplastic OS=Lotus japonicus GN=DGD1 PE=2 SV=1	DGD1	85.263	5.2	4	2	2	0	0	0	0	0	0	0	0	0	0	0	0	0	0	0	0	0	0	7790.4	0	0	0	0	0
Capana01g003643	COPB2_ARATH Coatomer subunit beta-2 OS=Arabidopsis thaliana GN=At4g31490 PE=2 SV=2	At4g31490	105.75	42.6	470	28	20	1804900	1755100	1729700	1551700	1566100	1610800	1696600	1699200	1722900	1311800	1347600	1266100	1491600	1479700	1482200	1586100	1564300	1547400	1581800	1534300	1498900	568190	619170	533600
Capana01g003644	CPR49_ARATH GDSL esterase/lipase CPRD49 OS=Arabidopsis thaliana GN=CPRD49 PE=2 SV=1	CPRD49	31.932	27.7	23	6	6	0	52781	58284	60889	58761	65968	36134	34489	0	47525	45645	46110	56750	48603	58651	67844	72900	53351	28399	32716	49399	70185	79975	89148
Capana01g003655	SYP24_ARATH Putative syntaxin-24 OS=Arabidopsis thaliana GN=SYP24 PE=3 SV=1	SYP24	27.261	6.3	13	1	1	0	0	0	0	0	0	0	0	0	0	0	0	0	0	0	0	0	0	0	0	0	0	11581	0
Capana01g003657	IMP4_RAT U3 small nucleolar ribonucleoprotein protein IMP4 OS=Rattus norvegicus GN=Imp4 PE=2 SV=1	Imp4	33.844	9.6	18	2	2	0	0	0	0	0	0	0	0	0	0	0	0	0	17045	0	19590	18897	0	21203	20559	0	22208	22417	0
Capana01g003662	BAS1B_ARATH 2-Cys peroxiredoxin BAS1-like, chloroplastic OS=Arabidopsis thaliana GN=At5g06290 PE=2 SV=3	At5g06290	29.605	46.3	317	11	10	4033200	4749200	4642700	4704300	4588800	4733800	5558600	5622300	5386800	6399700	6524700	6218500	4254000	4225200	4239800	4272900	4351200	4533200	4599200	4658700	4667100	6263900	6355300	6211300
Capana01g003678	UEV1D_ARATH Ubiquitin-conjugating enzyme E2 variant 1D OS=Arabidopsis thaliana GN=UEV1D PE=1 SV=1	UEV1D	16.591	69.9	191	7	4	1010200	894710	867190	922840	891380	909020	778220	801610	753990	1075700	1104600	1085300	879940	905290	936720	905570	912830	903750	1004200	1048200	997050	1333300	1347800	1319600
Capana01g003684	ILL7_ORYSJ IAA-amino acid hydrolase ILR1-like 7 OS=Oryza sativa subsp. japonica GN=ILL7 PE=2 SV=1	ILL7	34.626	9.3	25	2	2	43258	0	44092	39554	41150	44124	0	45545	45662	0	0	53569	41124	45206	43798	41967	42286	42064	0	47117	42556	39713	34175	37294
Capana01g003691	DOC11_HUMAN Dedicator of cytokinesis protein 11 OS=Homo sapiens GN=DOCK11 PE=1 SV=2	DOCK11	28.902	13.2	12	2	2	0	20082	16865	22083	0	19264	29974	28096	28084	14344	0	10388	21177	0	13137	17974	18727	19750	28325	0	23113	0	0	0
Capana01g003692	DOC10_MOUSE Dedicator of cytokinesis protein 10 OS=Mus musculus GN=Dock10 PE=1 SV=3	Dock10	152.9	5	19	3	3	25577	32498	19281	19744	16151	13818	20772	0	25720	17202	13660	0	15278	12592	0	26191	20962	17440	19668	17646	15822	0	0	0
Capana01g003695	Putative ovule protein	---	66.063	49.1	289	22	22	1234400	1169500	1126200	1191600	1155000	1142500	1377500	1306400	1369400	951480	978700	947960	1118800	1136600	1131200	1155400	1088900	1113600	1027200	1054300	1025000	413220	443450	451560
Capana01g003707	FBL15_ARATH F-box/LRR-repeat protein 15 OS=Arabidopsis thaliana GN=FBL15 PE=1 SV=2	FBL15	107.2	6.2	5	3	3	0	0	0	0	0	0	0	0	0	0	179030	1255800	0	0	0	0	0	0	0	0	0	379480	0	0
Capana01g003725	RISB_ARATH 6,7-dimethyl-8-ribityllumazine synthase, chloroplastic OS=Arabidopsis thaliana GN=At2g44050 PE=2 SV=1	At2g44050	23.676	21	53	4	4	2169200	2922900	2841400	3071500	2877900	3456200	2848400	2621200	2801700	3377500	3628000	3124200	2778900	2869900	2753000	2359900	2703400	2594300	1925700	2300600	2227200	5439500	5181300	4990400
Capana01g003729	LEA14_GOSHI Late embryogenesis abundant protein Lea14-A OS=Gossypium hirsutum GN=LEA14-A PE=2 SV=1	LEA14-A	36.259	51.7	256	15	15	1197700	1097000	983940	991990	983440	938260	1108900	1117200	1128600	1309700	1352600	1341800	1066900	1046000	1076300	1174500	1180200	1143800	1295800	1235000	1241100	1267000	1318800	1310800
Capana01g003735	ITPK4_ARATH Inositol-tetrakisphosphate 1-kinase 4 OS=Arabidopsis thaliana GN=ITPK4 PE=2 SV=2	ITPK4	57.31	5.9	7	2	2	25220	13630	0	0	0	0	11919	0	0	0	0	11094	13704	12362	0	15207	11979	0	0	9490.8	0	0	0	0
Capana01g003736	Putative ovule protein	---	30.986	44.2	141	8	8	549770	564400	555410	573550	597120	608020	617450	611120	574540	664250	635840	633200	584870	573910	568720	606940	562930	629040	544480	532690	525140	927130	939840	955570
Capana01g003755	BGAL_VIBC3 Beta-galactosidase OS=Vibrio cholerae serotype O1 (strain ATCC 39541 / Ogawa 395 / O395) GN=lacZ PE=3 SV=2	lacZ	91.652	15.4	89	10	10	290470	314530	282360	253050	205780	272760	286100	302010	332290	211680	203330	204110	244570	256590	261350	290240	293950	272220	270540	257850	240570	96984	88800	86572
Capana01g003756	BGAL_PSEHA Beta-galactosidase OS=Pseudoalteromonas haloplanktis GN=lacZ PE=1 SV=2	lacZ	11.893	22.5	30	2	2	0	0	149640	92137	123070	131500	158000	150580	154600	84018	80326	81822	34488	0	39542	151790	103810	0	0	0	0	39687	43658	35152
Capana01g003759	RL91_ARATH 60S ribosomal protein L9-1 OS=Arabidopsis thaliana GN=RPL9B PE=2 SV=3	RPL9B	21.977	58.8	232	11	6	2094100	1960100	1999300	1992200	1988600	1965200	1682900	1685800	1673200	1732000	1598300	1645200	1866500	1845700	1840100	1721500	1743900	1744800	1669700	1687300	1710600	1727300	1831300	1603300
Capana01g003771	YCF1_SOLBU Putative membrane protein ycf1 OS=Solanum bulbocastanum GN=ycf1 PE=3 SV=1	ycf1	42.655	18.3	46	5	5	64677	68951	88375	72843	101490	96228	118720	123230	111310	55799	71020	63549	86933	67283	100940	119170	94494	115660	147980	135090	143500	73865	0	0
Capana01g003776	RP8L2_ARATH Probable disease resistance RPP8-like protein 2 OS=Arabidopsis thaliana GN=RPP8L2 PE=1 SV=1	RPP8L2	32.056	19.5	23	4	4	73552	273570	166520	178980	235680	187710	189040	132740	262190	188280	193830	151370	179660	148900	151440	224830	155400	247420	139490	76320	172980	0	0	103860
Capana01g003780	NTF4_TOBAC Mitogen-activated protein kinase homolog NTF4 OS=Nicotiana tabacum GN=NTF4 PE=2 SV=1	NTF4	45.042	38.7	125	9	4	342640	341120	342790	320450	315020	316790	286000	293050	301300	279970	293770	275030	285470	302180	318600	328000	341360	296120	269920	267930	280000	209920	213990	239290
Capana01g003799	EIF2A_CHICK Eukaryotic translation initiation factor 2A OS=Gallus gallus GN=EIF2A PE=2 SV=1	EIF2A	37.539	38.2	113	9	9	329840	319720	363660	330600	358210	373410	327600	307050	335170	292640	268390	266460	326320	374880	346900	349670	326610	330800	268580	263750	300950	363250	407910	400250
Capana01g003802	SCP19_ARATH Serine carboxypeptidase-like 19 OS=Arabidopsis thaliana GN=SCPL19 PE=1 SV=1	SCPL19	33.109	46.7	103	8	8	213790	192070	206610	208490	206260	208480	168880	168290	165260	170620	178620	184140	163150	153330	155820	147520	133310	146390	113170	122010	110440	176480	190080	205770
Capana01g003815	M cell-type agglutination protein like	---	11.462	24	1	1	1	0	0	0	0	0	0	0	0	0	0	0	0	0	0	0	0	4916.5	0	0	0	0	0	0	0
Capana01g003816	Putative ribosomal RNA small subunit methyltransferase G-like	---	24.481	52.3	112	9	9	1903700	1795500	1849800	1833100	1876300	1926300	2219600	2133600	2153300	2159800	2137800	2127000	1835000	1799900	1851100	1860900	1937300	1927500	1794700	1829900	1788700	1868300	2101200	1896700
Capana01g003827	MAOX_VITVI NADP-dependent malic enzyme OS=Vitis vinifera PE=2 SV=1	---	63.187	34.8	92	11	9	189890	186260	175040	174530	172030	187460	186020	195140	194140	175130	169990	168760	187360	188970	187180	195640	198060	201860	182750	176300	183540	145280	146400	142710
Capana01g003847	VPS53_MOUSE Vacuolar protein sorting-associated protein 53 homolog OS=Mus musculus GN=Vps53 PE=2 SV=1	Vps53	21.109	15.8	6	2	1	0	0	0	0	0	0	0	0	0	0	0	0	0	0	0	0	57656	0	0	0	0	0	0	0
Capana01g003875	PP431_ARATH Pentatricopeptide repeat-containing protein At5g55740, chloroplastic OS=Arabidopsis thaliana GN=CRR21 PE=2 SV=1	CRR21	94.188	5.5	4	2	2	0	0	0	0	0	0	0	0	0	0	0	0	0	0	0	0	0	0	0	0	0	4689100	0	0
Capana01g003876	MAOM_SOLTU NAD-dependent malic enzyme 62 kDa isoform, mitochondrial OS=Solanum tuberosum PE=1 SV=1	---	68.139	49.2	221	16	16	499180	599060	603910	512370	558790	560160	692500	694220	664110	663400	664400	694340	601660	596920	626700	616790	635540	649950	629800	624500	621730	499450	445550	424130
Capana01g003903	AB1C_ARATH ABC transporter C family member 1 OS=Arabidopsis thaliana GN=ABCC1 PE=1 SV=1	ABCC1	27.392	9.2	3	1	1	0	0	0	0	0	0	0	0	0	0	0	0	0	0	0	0	0	0	0	0	18145	0	0	0
Capana01g003904	AB2C_ARATH ABC transporter C family member 2 OS=Arabidopsis thaliana GN=ABCC2 PE=1 SV=2	ABCC2	101.57	30.8	204	18	18	425050	381390	450670	342660	347400	322850	625370	507220	526910	399030	407010	417960	305190	315470	330180	518510	562250	543330	566620	607230	567290	136610	153990	174270
Capana01g003908	PATA3_SOLTU Patatin group A-3 OS=Solanum tuberosum PE=2 SV=1	---	51.013	31.4	112	8	8	156040	151770	181860	317570	314030	324860	99318	81097	80446	434710	405390	468420	384110	366130	370880	187520	183680	213570	417180	428980	453540	404870	389210	380480
Capana01g003910	PSAK_ARATH Photosystem I reaction center subunit psaK, chloroplastic OS=Arabidopsis thaliana GN=PSAK PE=2 SV=2	PSAK	13.294	34.6	23	2	2	85044	88904	174260	0	0	0	162720	36303	0	507380	84043	455060	121600	0	77172	48388	149960	83034	41039	102280	46455	100070	0	203250
Capana01g003914	3-oxo-Delta(4,5)-steroid 5-beta-reductase-like	---	43.688	32.5	38	9	2	225200	92707	224780	109500	215830	214630	183120	199550	162660	122450	61835	41753	218630	161190	235410	76196	172370	191650	119680	151360	33417	36461	79595	122390
Capana01g003927	TM9S4_PONAB Transmembrane 9 superfamily member 4 OS=Pongo abelii GN=TM9SF4 PE=2 SV=1	TM9SF4	73.267	5.2	29	2	2	37630	105610	89044	123690	109520	99448	68620	49870	0	49690	82164	49802	74941	76913	78314	63023	65822	57340	0	38623	40795	158140	166630	74721
Capana01g003930	RS15_LEGPL 30S ribosomal protein S15 OS=Legionella pneumophila (strain Lens) GN=rpsO PE=3 SV=1	rpsO	46.076	10.4	9	3	3	0	19538	0	0	0	0	0	0	0	0	0	0	0	55983	0	0	0	15341	0	0	14836	0	0	0
Capana01g003955	MOMT_CATRO Myricetin O-methyltransferase OS=Catharanthus roseus PE=1 SV=1	---	39.48	13.1	17	3	3	46209	49084	37435	24657	43057	42552	39989	39919	0	24703	0	0	37219	0	39859	44259	37483	38758	24327	24363	29155	0	0	23992
Capana01g003957	Y464_SYNE7 UPF0133 protein Synpcc7942_0464 OS=Synechococcus elongatus (strain PCC 7942) GN=Synpcc7942_0464 PE=3 SV=2	Synpcc7942_0464	17.164	60.4	174	7	7	401160	505600	545090	618640	618810	643520	893710	845720	826660	1078700	1060400	983620	622920	627590	634180	551650	677870	729040	994480	1019000	1010000	1174500	1093600	1064100
Capana01g003958	ENL1_ARATH Early nodulin-like protein 1 OS=Arabidopsis thaliana GN=At2g25060 PE=1 SV=2	At2g25060	14.88	10.9	13	1	1	19759	17119	0	21766	18859	18978	0	0	0	46082	45562	26730	0	16073	0	16512	16781	16251	20577	22431	11524	44054	44510	70612
Capana01g003959	ENL1_ARATH Early nodulin-like protein 1 OS=Arabidopsis thaliana GN=At2g25060 PE=1 SV=2	At2g25060	19.938	20.3	30	3	3	49815	46233	50824	45416	55665	58850	47743	48601	46249	112480	110730	84308	32647	36657	33070	32594	47061	50574	72600	69793	73074	195010	147250	179180
Capana01g003981	GPX7_ARATH Putative glutathione peroxidase 7, chloroplastic OS=Arabidopsis thaliana GN=GPX7 PE=2 SV=2	GPX7	26.537	42.7	114	8	8	1311500	725380	1102600	1208000	1268500	1209700	1865800	1633000	1665900	1579900	1913600	2021900	1236200	961130	694250	1261400	1459200	1086200	1442900	1868300	1762300	1808800	1874500	1843600
Capana01g003999	TMM85_XENLA Transmembrane protein 85 OS=Xenopus laevis GN=tmem85 PE=2 SV=1	tmem85	19.363	15.2	42	2	2	0	42284	49692	60047	55491	59714	40158	44379	0	47739	57466	61878	58347	61286	62297	64674	60843	55201	42798	43937	50312	133600	128750	121920
Capana01g004002	HSP7G_ARATH Heat shock 70 kDa protein 7, chloroplastic OS=Arabidopsis thaliana GN=HSP70-7 PE=1 SV=1	HSP70-7	75.296	28.1	95	13	9	136210	119170	120930	100590	106700	110310	172010	175030	189070	291190	289560	291960	110540	84208	96308	128710	114120	109620	192810	186930	185290	209190	216120	218420
Capana01g004009	MGDG_TOBAC Probable monogalactosyldiacylglycerol synthase, chloroplastic OS=Nicotiana tabacum GN=MGD A PE=2 SV=1	MGD	67.205	11.8	47	4	4	87052	77170	71053	77047	72856	70250	0	85275	74301	51864	52670	57859	71963	67748	71865	73839	74916	76851	0	59404	64166	43284	57683	55151
Capana01g004019	Y4424_ARATH DUF21 domain-containing protein At4g14240 OS=Arabidopsis thaliana GN=CBSDUF1 PE=2 SV=1	CBSDUF1	52.554	27.3	129	9	6	225760	245370	232980	241050	228700	252670	241330	232790	251110	219940	220570	211000	242770	230600	231910	243190	249550	258970	231760	227010	206230	183240	207330	228700
Capana01g004024	DRP3A_ARATH Dynamin-related protein 3A OS=Arabidopsis thaliana GN=DRP3A PE=1 SV=2	DRP3A	40.585	20.5	23	5	4	51082	51516	42150	38693	40265	32815	33507	36927	34862	36822	27024	34323	59110	52901	49931	39203	39500	45362	45120	39517	42266	19435	0	0
Capana01g004028	FKB13_ARATH Peptidyl-prolyl cis-trans isomerase FKBP13, chloroplastic OS=Arabidopsis thaliana GN=FKBP13 PE=1 SV=2	FKBP13	23.649	31.2	58	5	5	1139700	1093100	1023400	1071700	1001000	938940	1204800	1171800	1187900	1507200	1487400	1470300	837250	795640	776210	917090	902170	851690	866490	834290	999020	1313600	1302700	1458900
Capana01g004029	NAD(P)-bd_dom domain-containing protein	---	29.356	62.9	163	11	11	509280	483800	523880	580120	523930	506240	431340	483910	523080	500130	468000	392580	569490	527500	572520	613980	580640	570410	482730	488850	492710	841980	825110	837370
Capana01g004051	protein KAKU4	---	32.693	36.1	118	7	7	325630	306120	285030	296150	265880	274610	206130	210230	197040	295030	289300	289400	285620	294480	304200	278780	280580	268760	289670	288070	280570	236810	235820	222960
Capana01g004055	SRSF3_MOUSE Serine/arginine-rich splicing factor 3 OS=Mus musculus GN=Srsf3 PE=1 SV=1	Srsf3	17.245	21.9	15	3	1	0	0	0	0	0	0	0	0	0	0	0	0	0	0	0	0	0	0	0	0	0	0	0	153040
Capana01g004056	SOX_ARATH Probable sarcosine oxidase OS=Arabidopsis thaliana GN=At2g24580 PE=2 SV=1	At2g24580	45.703	26.5	117	7	6	150810	159930	151540	186230	196590	183630	155910	147960	141310	165920	187550	172170	164450	156100	164830	136410	128520	141520	112820	119470	125480	144730	152510	146420
Capana01g004077	RPOC1_ATRBE DNA-directed RNA polymerase subunit beta' OS=Atropa belladonna GN=rpoC1 PE=3 SV=2	rpoC1	44.119	21.8	43	7	6	167080	155780	147380	156890	153510	158620	146680	154390	132860	112670	106000	113060	133370	138270	127670	149000	139100	159530	126070	113810	127880	64482	75554	86307
Capana01g004078	RPOB_ATRBE DNA-directed RNA polymerase subunit beta OS=Atropa belladonna GN=rpoB PE=3 SV=1	rpoB	90.027	30.9	168	16	10	427770	435280	432060	423660	418490	414200	451250	441100	469390	321920	323250	318730	328260	324000	324510	366010	373560	376060	406840	378450	363740	97087	88107	100230
Capana01g004086	COG3_HUMAN Conserved oligomeric Golgi complex subunit 3 OS=Homo sapiens GN=COG3 PE=1 SV=3	COG3	15.132	8.9	20	1	1	0	0	0	0	0	0	0	0	0	0	0	0	0	0	0	0	0	0	0	0	0	0	0	6419.5
Capana01g004093	GDL8_ARATH GDSL esterase/lipase At1g28590 OS=Arabidopsis thaliana GN=At1g28590 PE=2 SV=2	At1g28590	41.183	41.5	214	11	11	769580	753640	730850	868640	893840	869140	616410	580910	577450	662020	625640	639110	1347500	1385300	1391900	1211100	1161900	1139000	893310	876020	900010	2348700	2443000	2428600
Capana01g004099	PAP8_ARATH Probable plastid-lipid-associated protein 8, chloroplastic OS=Arabidopsis thaliana GN=PAP8 PE=2 SV=1	PAP8	26.029	29.4	40	5	5	113600	82800	120340	175060	148120	136530	131690	164290	148680	140390	108080	78955	135860	131530	123660	90721	117110	133310	144290	179130	115250	149200	158720	159860
Capana01g004101	PUR_ARATH Transcription factor Pur-alpha 1 OS=Arabidopsis thaliana GN=PURA1 PE=1 SV=2	PURA1	31.282	17.1	18	4	2	54413	68362	45751	63596	66327	63733	61142	63339	0	72251	68178	50968	0	72211	0	0	0	55502	0	0	61350	0	82399	0
Capana01g004113	PPIL3_CRYNJ Peptidyl-prolyl cis-trans isomerase-like 3 OS=Cryptococcus neoformans var. neoformans serotype D (strain JEC21 / ATCC MYA-565) GN=CYP10 PE=3 SV=1	CYP10	16.958	17.6	10	2	2	0	0	0	0	0	0	0	0	0	0	0	0	0	41809	0	0	0	0	0	0	0	58221	0	61905
Capana01g004115	AIG2L_ARATH AIG2-like protein OS=Arabidopsis thaliana GN=At5g39720 PE=1 SV=1	At5g39720	19.646	57.1	103	8	8	284360	302420	327750	335500	287040	293100	373250	373270	371710	473600	438110	434520	371090	345810	348630	355730	334250	381830	387220	423970	394700	539920	485970	501160
Capana01g004116	P2C60_ARATH Probable protein phosphatase 2C 60 OS=Arabidopsis thaliana GN=At4g31860 PE=2 SV=1	At4g31860	40.705	16	22	3	3	63584	54753	32496	41669	34580	27525	41180	31296	30809	0	35450	44385	0	29813	0	41264	29084	0	30511	41837	0	0	0	25401
Capana01g004117	Putative WAS/WASL-interacting protein family member 1-like	---	17.745	7.8	5	1	1	0	0	0	0	0	0	0	0	0	0	0	0	0	0	0	0	0	0	0	0	0	0	0	48624
Capana01g004119	LAMB1_HUMAN Laminin subunit beta-1 OS=Homo sapiens GN=LAMB1 PE=1 SV=2	LAMB1	51.436	18.5	59	6	6	81319	68957	72286	63187	67554	71533	68628	58133	64144	55212	52332	66123	68297	74962	79749	93648	70185	76846	73662	69931	78424	114540	126920	124130
Capana01g004129	ATPAM_NICPL ATP synthase subunit alpha, mitochondrial OS=Nicotiana plumbaginifolia GN=ATPA PE=3 SV=1	ATPA	55.225	46	743	20	6	5681900	6633600	6826200	6697600	7090800	7240400	7742700	7375700	7232800	8269700	8160700	8227500	8126000	7933300	8021900	6548900	7738500	8139500	7287300	7205200	8086600	10200000	9274000	8982700
Capana01g004183	POTD2_HAEIN Spermidine/putrescine-binding periplasmic protein 2 OS=Haemophilus influenzae (strain ATCC 51907 / DSM 11121 / KW20 / Rd) GN=potD-A PE=3 SV=2	potD-A	59.817	15.9	37	5	5	84488	69923	68777	60311	61494	56422	0	31586	67838	32250	36851	0	93819	68232	79346	123420	92415	103440	50838	66893	90846	39311	28697	90202
Capana01g004197	photosynthetic NDH subunit of subcomplex B 3, chloroplastic	---	18.442	18.7	26	2	2	0	41998	0	0	0	0	0	74144	88327	61978	0	34569	74970	0	74855	0	62829	0	0	0	0	0	0	0
Capana01g004201	NOTUM_MOUSE Protein notum homolog OS=Mus musculus GN=Notum PE=2 SV=2	Notum	44.689	54	310	14	14	2191500	2044100	2095800	2354200	2403500	2363500	1681200	1734200	1744800	1763300	1739900	1846000	2372500	2407400	2287300	2081900	2103900	2000900	1477900	1529200	1514700	2968900	3033400	2951500
Capana01g004217	BEBT_TOBAC Benzyl alcohol O-benzoyltransferase OS=Nicotiana tabacum GN=HSR201 PE=1 SV=1	HSR201	43.448	28	65	9	7	282820	253530	266550	336660	301290	342850	286020	274360	300160	183780	215820	90161	37604	26907	46166	32145	33697	0	21479	23484	23888	39111	33645	30311
Capana01g004234	UAF30_YEAST Upstream activation factor subunit UAF30 OS=Saccharomyces cerevisiae (strain ATCC 204508 / S288c) GN=UAF30 PE=1 SV=1	UAF30	11.457	30.3	15	2	2	0	0	0	0	0	0	0	0	0	0	0	0	0	0	0	0	0	0	0	0	0	0	0	43029
Capana01g004236	U420_DICDI UPF0420 protein OS=Dictyostelium discoideum GN=DDB_G0277179 PE=3 SV=1	DDB_G0277179	40.284	15.4	60	4	4	40097	54031	56658	53649	53314	58460	50962	65139	54040	43104	41989	41465	74104	79056	78172	74201	69008	73218	45359	58741	60170	75229	84914	76092
Capana01g004264	KIRO_ACTDE Kirola OS=Actinidia deliciosa PE=1 SV=1	---	16.754	46.3	141	7	7	310020	315400	272410	276800	268630	252240	316200	327640	321750	401420	415440	397640	1025100	1048300	1010100	1223300	1152600	1155100	1173600	1176500	1154600	1465700	1473700	1562800
Capana01g004269	Y381_RICFE Putative ankyrin repeat protein RF_0381 OS=Rickettsia felis (strain ATCC VR-1525 / URRWXCal2) GN=RF_0381 PE=4 SV=1	RF_0381	27.101	32.1	58	4	4	124700	98265	92523	108430	82821	98255	76661	86333	71541	56139	74081	0	89987	95633	89570	110220	86920	79467	74131	85987	83732	75715	65843	85852
Capana01g004281	PMTK_ARATH Probable methyltransferase PMT20 OS=Arabidopsis thaliana GN=At1g31850 PE=1 SV=1	At1g31850	68.055	24.6	113	9	6	298150	271800	276850	296570	270580	271020	193890	188630	192400	190780	180170	173600	242620	235950	243900	220720	224230	229190	203100	194940	198170	284150	304070	315230
Capana01g004287	RPM1_ARATH Disease resistance protein RPM1 OS=Arabidopsis thaliana GN=RPM1 PE=1 SV=1	RPM1	106.4	4.9	15	3	3	26391	23660	31360	15467	18813	0	0	28452	22307	0	0	0	15551	17977	16713	24905	19455	27115	0	0	20294	0	0	0
Capana01g004297	CMT2_ARATH DNA (cytosine-5)-methyltransferase CMT2 OS=Arabidopsis thaliana GN=CMT2 PE=2 SV=3	CMT2	125.59	12.6	37	9	9	121410	122180	108040	108590	107020	126690	81665	72717	84742	106640	111320	114200	84281	76924	81663	137760	111090	113050	124910	130230	118330	0	0	0
Capana01g004323	HSF8_SOLLC Heat shock factor protein HSF8 OS=Solanum lycopersicum GN=HSF8 PE=3 SV=1	HSF8	48.537	9.2	13	3	2	0	13966	14626	0	0	0	14835	0	16914	13602	0	13572	12478	0	9119.5	0	10030	0	0	11070	0	0	0	14301
Capana01g004329	DUF1985 domain-containing protein	---	26.206	6.8	0	1	1	0	0	0	0	0	0	0	0	0	0	0	0	0	0	0	0	0	0	0	0	0	0	0	0
Capana01g004332	ITPK1_MAIZE Inositol-tetrakisphosphate 1-kinase 1 OS=Zea mays GN=ITPK1 PE=2 SV=1	ITPK1	41.844	13.9	4	4	3	0	0	0	0	0	0	0	35873	0	0	0	0	30092	32196	0	0	0	0	0	0	31093	0	0	0
Capana01g004351	AGD8_ARATH Probable ADP-ribosylation factor GTPase-activating protein AGD8 OS=Arabidopsis thaliana GN=AGD8 PE=1 SV=1	AGD8	34.629	20	24	4	3	93965	66810	0	55068	0	0	0	0	0	0	0	75884	72350	60166	0	0	0	0	0	51365	0	76750	89847	0
Capana01g004366	AB7I_ARATH Protein ABCI7, chloroplastic OS=Arabidopsis thaliana GN=ABCI7 PE=1 SV=1	ABCI7	54.794	25.9	162	10	10	711570	670030	652180	686000	654710	682230	702530	686890	716840	643500	629980	609120	633500	672000	587840	579570	574000	647850	574500	594140	570620	702160	661420	682380
Capana01g004372	HABP4_PAI-RBP1 domain-containing protein	---	33.762	33	117	10	9	598150	501760	507750	472410	444080	428420	309160	342510	357250	620980	567400	596470	461900	430110	460610	488380	442300	425010	581540	503490	510390	305840	346100	338380
Capana01g004373	HCT_ARATH Hydroxycinnamoyl-Coenzyme A shikimate/quinate hydroxycinnamoyltransferase OS=Arabidopsis thaliana GN=HCT PE=2 SV=1	HCT	42.132	41	208	13	13	841430	853470	804860	759330	776560	736910	712480	700980	736090	599400	559910	580830	949990	965420	940620	977410	940950	953330	818160	838110	846930	821440	761260	767180
Capana01g004374	VAP21_ARATH Vesicle-associated protein 2-1 OS=Arabidopsis thaliana GN=PVA21 PE=2 SV=1	PVA21	16.568	46.3	34	4	3	39036	0	49031	56882	0	53251	42467	37094	38476	33919	34673	27718	55378	56600	55140	0	0	47395	41016	39124	42840	49580	34447	41485
Capana01g004396	SC16B_RABIT Protein transport protein Sec16B OS=Oryctolagus cuniculus GN=SEC16B PE=2 SV=1	SEC16B	136.54	4.3	16	3	2	25545	0	38262	38453	0	0	23534	23647	0	17530	0	12855	19665	0	19734	0	16860	20707	0	0	16112	0	0	0
Capana01g004397	SYCP1_ARATH Synaptonemal complex protein 1 OS=Arabidopsis thaliana GN=ZYP1A PE=2 SV=1	ZYP1A	147.96	5.6	13	5	4	44818	41828	39942	41473	60737	39844	35768	32585	36847	41303	30948	0	32619	0	33648	47122	31807	36383	42610	36734	34438	29976	31095	31597
Capana01g004399	histidine triad nucleotide-binding protein 3	---	15.352	12.4	16	1	1	0	0	0	0	0	0	0	0	0	0	0	0	0	0	0	0	0	0	0	0	0	0	0	10437
Capana01g004402	tRNA_edit domain-containing protein	---	25.684	23.7	30	2	2	0	0	0	0	0	0	0	0	0	0	0	0	46122	48304	54165	0	43612	0	0	36310	26776	26789	0	20309
Capana01g004409	ESCA_ARATH Putative DNA-binding protein ESCAROLA OS=Arabidopsis thaliana GN=ESC PE=2 SV=1	ESC	34.605	23.7	27	4	4	23569	31664	28661	49043	29850	24979	0	0	0	40069	42296	28242	36663	0	27549	38491	27644	34606	24745	21295	22488	64619	65559	75037
Capana01g004415	EXOS7_HUMAN Exosome complex component RRP42 OS=Homo sapiens GN=EXOSC7 PE=1 SV=3	EXOSC7	28.793	10.3	22	2	2	0	0	0	0	0	0	0	0	0	0	0	0	0	0	0	0	0	0	0	0	0	27784	24810	23598
Capana01g004435	YOCS_BACSU Uncharacterized sodium-dependent transporter yocS OS=Bacillus subtilis GN=yocS PE=3 SV=1	yocS	38.799	5.5	6	1	1	0	0	0	0	0	0	0	0	0	0	0	0	0	0	0	0	0	0	0	0	0	0	0	21933
Capana01g004439	PGL1A_ARATH PGR5-like protein 1A, chloroplastic OS=Arabidopsis thaliana GN=PGRL1A PE=1 SV=1	PGRL1A	35.535	16.1	58	5	5	89727	98341	126250	121210	130300	122780	129650	122340	136620	87887	113420	110450	146260	143750	127830	129200	135720	140920	123970	148290	122510	106680	122700	115340
Capana01g004460	SRR_BOVIN Serine racemase OS=Bos taurus GN=SRR PE=2 SV=1	SRR	35.338	20.4	37	4	4	35123	40159	38029	38424	39028	32827	33664	35564	0	39539	34447	37316	50789	50251	48524	51367	45451	52256	63830	62938	60434	48345	48449	59523
Capana01g004463	KTI12_DANRE Protein KTI12 homolog OS=Danio rerio GN=kti12 PE=2 SV=2	kti12	14.115	20.6	18	2	2	0	0	0	22706	0	0	21877	21276	22218	0	24027	24067	23067	23355	22805	25453	22366	24179	22535	23345	22466	23256	0	34542
Capana01g004477	NDK4_ARATH Nucleoside diphosphate kinase IV, chloroplastic/mitochondrial OS=Arabidopsis thaliana GN=NDK4 PE=1 SV=2	NDK4	33.573	14.3	16	4	1	0	0	0	0	0	0	0	0	0	0	0	0	0	0	0	0	0	0	0	0	0	0	0	44182
Capana01g004487	beta-carotene isomerase D27, chloroplastic-like	---	26.752	24.8	78	4	4	270370	253300	236910	247020	235720	257400	287520	294010	300170	139410	186160	170630	215990	196310	189470	260680	264670	265060	218200	214690	209940	189110	186380	184020
Capana01g004493	PSAN_ARATH Photosystem I reaction center subunit N, chloroplastic OS=Arabidopsis thaliana GN=PSAN PE=1 SV=2	PSAN	17.725	36.7	291	9	9	11399000	10487000	11097000	11067000	11179000	11409000	14237000	13408000	13749000	18432000	18038000	18133000	12955000	13169000	12885000	13503000	13494000	13975000	16207000	16301000	16888000	22318000	22448000	22478000
Capana02g000001	WRBA_DESMR Flavoprotein wrbA OS=Desulfovibrio magneticus (strain ATCC 700980 / DSM 13731 / RS-1) GN=wrbA PE=3 SV=1	wrbA	27.109	27.5	61	5	5	134530	149920	153510	156600	153820	156230	166710	166510	184730	148370	147860	150000	154510	148160	150030	150990	141630	133870	128960	128120	129070	170740	183290	188550
Capana02g000008	RPT2_ARATH Root phototropism protein 2 OS=Arabidopsis thaliana GN=RPT2 PE=1 SV=2	RPT2	64.431	26	127	10	10	617060	570590	620810	554040	548220	611500	577910	526670	533700	274670	314850	318860	647370	674800	668640	525800	572810	561810	510170	495210	468370	215690	243470	227200
Capana02g000014	ACCO_ACTDE 1-aminocyclopropane-1-carboxylate oxidase OS=Actinidia deliciosa GN=ACO PE=2 SV=1	ACO	36.134	49.2	140	12	7	1134100	1113400	957680	1041600	1032000	955280	784270	812370	815890	754920	750710	795360	388750	398300	434600	339270	362000	325670	171610	179760	263750	331180	319330	340170
Capana02g000015	STIP1_BOVIN Stress-induced-phosphoprotein 1 OS=Bos taurus GN=STIP1 PE=2 SV=1	STIP1	84.869	17.1	32	8	6	86727	94909	78610	52838	49045	51150	86572	71932	74743	53481	45181	46030	49436	43110	34367	77103	59908	54153	101470	74156	77754	0	54085	51639
Capana02g000024	CGEP_ARATH Probable glutamyl endopeptidase, chloroplastic OS=Arabidopsis thaliana GN=GEP PE=2 SV=2	GEP	85.639	38.9	423	20	20	3328000	3262000	3050900	2931900	2991800	2939500	3449900	3453100	3497400	3090000	3010100	3040500	2740500	2743100	2752400	3047200	2944700	2928700	2795600	2756400	2801200	1869800	1874500	1872200
Capana02g000031	AMPP1_SORMK Probable Xaa-Pro aminopeptidase P OS=Sordaria macrospora (strain ATCC MYA-333 / DSM 997 / K(L3346) / K-hell) GN=AMPP PE=3 SV=1	AMPP	71.448	54.9	424	20	20	1439000	1297200	1342900	1398200	1450400	1356200	1152400	1138500	1175200	1260500	1209800	1247700	1357300	1406200	1339800	1397000	1290000	1304700	1156700	1164200	1228500	1404500	1433300	1457700
Capana02g000053	ASPR_CUCPE Aspartic proteinase OS=Cucurbita pepo PE=2 SV=1	---	51.818	17.2	21	6	5	53703	47002	0	40999	47873	49684	0	20072	36742	46915	41539	39409	54354	61101	49290	67596	58906	62613	44241	0	71872	96561	73407	106430
Capana02g000063	RS13_SOYBN 40S ribosomal protein S13 OS=Glycine max GN=RPS13 PE=2 SV=1	RPS13	13.58	40.3	11	4	1	0	0	0	0	0	0	0	0	0	0	0	0	0	0	0	0	0	0	0	0	0	0	0	17039
Capana02g000066	TKTC_SOLTU Transketolase, chloroplastic OS=Solanum tuberosum PE=2 SV=1	---	23.134	80.4	348	13	12	9656800	10058000	10551000	10233000	10452000	10483000	13142000	13195000	12766000	11338000	10881000	10984000	10673000	10794000	10589000	10291000	10562000	10746000	10210000	10338000	10466000	9860800	9721500	9994700
Capana02g000067	TKTC_SOLTU Transketolase, chloroplastic OS=Solanum tuberosum PE=2 SV=1	---	53.135	57.8	169	18	11	4185400	4029800	4164700	4073700	4372800	4398200	5429000	5294900	5338500	4412500	4447100	4433100	3905100	4056300	3987400	4113000	4211400	4237500	3932600	4048700	4352700	4291300	3868100	3760600
Capana02g000083	ESCA_ARATH Putative DNA-binding protein ESCAROLA OS=Arabidopsis thaliana GN=ESC PE=2 SV=1	ESC	35.973	5	4	1	1	0	0	0	0	0	0	0	0	0	0	0	0	0	0	0	0	0	0	0	0	0	0	0	27188
Capana02g000085	LRC40_DANRE Leucine-rich repeat-containing protein 40 OS=Danio rerio GN=lrrc40 PE=2 SV=1	lrrc40	61.94	3	3	1	1	0	0	0	0	0	0	0	0	0	0	0	0	0	0	0	0	0	0	0	0	3680.2	0	0	0
Capana02g000105	protein COFACTOR ASSEMBLY OF COMPLEX C SUBUNIT B CCB3, chloroplastic	---	23.099	8.6	3	1	1	0	0	0	0	0	0	0	0	0	0	0	0	0	0	0	0	0	0	0	0	0	0	0	34206
Capana02g000113	CLPP2_ARATH ATP-dependent Clp protease proteolytic subunit 2, mitochondrial OS=Arabidopsis thaliana GN=CLPP2 PE=1 SV=1	CLPP2	26.308	45.1	169	8	7	552280	561570	587620	620510	622500	587880	629660	668020	632460	721450	672700	674660	594630	601320	590660	663580	639010	628530	650100	588890	656950	817220	807180	809010
Capana02g000121	P2SAF_ARATH Photosystem II stability/assembly factor HCF136, chloroplastic OS=Arabidopsis thaliana GN=HCF136 PE=1 SV=1	HCF136	38.321	12.7	69	3	3	828210	0	0	0	0	0	0	0	0	0	0	809560	0	1012300	1060000	1035500	1023100	0	931710	0	0	1162200	1756700	1309000
Capana02g000122	P2SAF_ARATH Photosystem II stability/assembly factor HCF136, chloroplastic OS=Arabidopsis thaliana GN=HCF136 PE=1 SV=1	HCF136	23.623	63.3	313	9	9	2689700	2823500	2971800	2740900	2846400	2763300	3687100	3569200	3477300	4308200	4335100	4320000	3077400	3043900	3017300	2501200	2626300	2846900	2724900	2927900	2844100	4946700	4707500	4792700
Capana02g000130	SACS_MOUSE Sacsin OS=Mus musculus GN=Sacs PE=1 SV=2	Sacs	266.14	0.6	5	1	1	0	0	0	0	0	0	0	0	0	0	0	0	0	0	0	0	0	0	0	0	0	0	0	45462
Capana02g000135	RBM34_MOUSE RNA-binding protein 34 OS=Mus musculus GN=Rbm34 PE=1 SV=1	Rbm34	66.455	9.6	23	5	5	25211	22579	0	33279	30519	21604	30595	20591	32438	85342	111000	112830	28774	0	21075	32442	26669	0	37577	28760	38518	85756	204890	182980
Capana02g000167	protein COFACTOR ASSEMBLY OF COMPLEX C SUBUNIT B CCB1, chloroplastic	---	28.773	20.1	84	3	3	256660	275310	326380	379980	382400	386760	482970	469270	460270	242900	325360	293490	300630	380760	360130	293110	334190	363340	149970	358240	352260	390530	479980	364820
Capana02g000173	Putative RNA binding protein	---	41.816	23.9	55	7	7	259770	231280	217500	211700	219580	189560	216120	247600	256450	216000	202160	206510	260320	236840	240250	300730	316500	257290	239760	310090	227260	102910	78555	91474
Capana02g000180	calumenin-B	---	30.585	12	20	2	2	91132	86952	84989	112510	101730	119200	89074	98673	110700	97609	106900	99355	77966	111150	129070	127290	159060	0	123000	113480	102470	89152	0	170910
Capana02g000197	KPYC_SOYBN Pyruvate kinase, cytosolic isozyme OS=Glycine max PE=2 SV=1	---	47.651	41	135	12	6	531160	603590	501230	504300	562240	520890	504750	483370	503510	485760	474100	451070	564050	580520	571250	519790	519050	504880	456950	495200	477190	491980	585880	597530
Capana02g000198	KPYC_SOLTU Pyruvate kinase, cytosolic isozyme OS=Solanum tuberosum PE=2 SV=1	---	17.757	29.7	61	3	1	128180	151930	161750	166820	153060	168650	177480	168320	174150	157480	161220	147620	199670	191130	191310	143100	165800	177570	170500	169700	171930	163610	167590	156130
Capana02g000200	Putative ovule protein	---	19.031	23.5	75	2	2	232940	219150	152180	167030	148630	140330	135630	68045	123060	118170	112990	113840	189570	148010	89821	223770	137710	150010	126170	119230	97340	113310	0	123440
Capana02g000201	IF4E1_MAIZE Eukaryotic translation initiation factor 4E-1 OS=Zea mays PE=2 SV=1	---	12.934	14.7	19	1	1	0	0	0	0	0	0	0	0	0	0	0	0	0	0	0	0	0	0	0	0	0	0	0	28137
Capana02g000203	VILI4_ARATH Villin-4 OS=Arabidopsis thaliana GN=VLN4 PE=1 SV=1	VLN4	18.243	18.9	22	2	2	0	0	73689	0	0	47536	0	0	44015	43815	49315	0	0	0	58523	38495	0	0	52270	63262	0	0	0	0
Capana02g000204	VILI4_ARATH Villin-4 OS=Arabidopsis thaliana GN=VLN4 PE=1 SV=1	VLN4	31.625	40.1	64	7	7	231840	256490	277740	251400	273860	260530	292690	315010	222840	354620	326900	376980	272800	253130	307460	290310	274170	285520	290380	318280	268990	227810	268980	321760
Capana02g000246	nuclear pore complex protein NUP214 isoform X4	---	48.413	13.4	4	3	3	0	0	0	0	0	0	0	0	0	0	0	13458	0	0	0	0	0	0	0	0	0	0	0	0
Capana02g000251	CADH6_ORYSJ Probable cinnamyl alcohol dehydrogenase 6 OS=Oryza sativa subsp. japonica GN=CAD6 PE=2 SV=2	CAD6	39.652	36.3	114	8	7	294030	298610	253160	274750	232990	273500	137110	166700	170050	186720	191100	213230	288300	292340	264390	265660	258460	276950	220400	233560	228940	426480	395930	424150
Capana02g000253	CUL4_ARATH Cullin-4 OS=Arabidopsis thaliana GN=CUL4 PE=1 SV=1	CUL4	60.642	11.7	12	5	2	0	48153	30020	0	0	0	25057	28020	0	24963	24981	0	28871	0	0	0	0	28168	42323	0	46385	0	14831	0
Capana02g000255	CUL4_ARATH Cullin-4 OS=Arabidopsis thaliana GN=CUL4 PE=1 SV=1	CUL4	30.17	15.2	16	3	2	0	0	0	0	0	0	0	0	0	0	0	0	0	0	0	0	0	22938	0	0	0	0	0	0
Capana02g000261	VPS54_DROME Vacuolar protein sorting-associated protein 54 OS=Drosophila melanogaster GN=scat PE=1 SV=1	scat	87.239	3.8	5	2	2	31627	0	33718	0	0	0	0	0	32624	0	0	0	34604	0	16129	0	37520	37769	61308	0	0	0	0	0
Capana02g000262	Vacuolar protein sorting-associated protein 54, chloroplastic	---	15.038	27.9	3	2	2	652130	555590	0	0	0	0	0	0	0	0	0	0	0	0	0	0	0	0	0	0	0	0	0	0
Capana02g000272	APR3_ARATH 5'-adenylylsulfate reductase 3, chloroplastic OS=Arabidopsis thaliana GN=APR3 PE=2 SV=2	APR3	51.471	35.3	38	10	7	182320	186270	168750	105280	104280	123080	60983	63206	70197	87987	57270	69322	117140	84392	117110	69779	66171	39267	40138	53880	45253	141190	77159	102290
Capana02g000282	probable inactive ATP-dependent zinc metalloprotease FTSHI 5, chloroplastic isoform X1	---	79.522	5.3	20	3	3	48159	47208	72134	0	0	55398	74890	43805	0	0	34308	0	0	0	0	0	0	43078	82301	0	0	0	0	24563
Capana02g000283	FTSH3_SYNY3 ATP-dependent zinc metalloprotease FtsH 3 OS=Synechocystis sp. (strain PCC 6803 / Kazusa) GN=ftsH3 PE=1 SV=1	ftsH3	67.775	12	29	5	5	62860	169720	206930	85516	108320	95999	139940	123530	133450	65978	84239	79708	49341	178590	99181	148080	161610	99321	108430	86107	165420	41564	18089	0
Capana02g000286	YHKF_SCHPO Uncharacterized RNA-binding protein C660.15 OS=Schizosaccharomyces pombe (strain 972 / ATCC 24843) GN=SPBC660.15 PE=2 SV=1	SPBC660.15	40.17	44	108	9	9	417430	440180	440390	463340	465450	501740	356380	374180	372490	443250	448720	422960	475170	428940	432160	405410	450320	452240	440370	431900	419810	693300	706350	811900
Capana02g000292	CSGA_MYXXA C-factor OS=Myxococcus xanthus GN=csgA PE=1 SV=1	csgA	18.86	21.8	22	2	2	0	21509	26062	26276	0	26907	23558	23818	23449	0	28929	29251	25816	0	31509	28885	31223	29272	28578	34501	24076	33568	33181	29266
Capana02g000303	KIWI_ARATH RNA polymerase II transcriptional coactivator KIWI OS=Arabidopsis thaliana GN=KIWI PE=1 SV=1	KIWI	11.723	43.3	15	3	3	17666	0	23917	25923	0	0	26729	0	29353	30015	29617	34872	39087	0	33974	0	22640	0	46938	36099	37045	65059	71166	31488
Capana02g000308	SUCA2_SOLLC Succinyl-CoA ligase [ADP-forming] subunit alpha-2, mitochondrial OS=Solanum lycopersicum PE=1 SV=1	---	36.814	44.8	210	12	12	1112100	1033600	1074900	1139500	1144900	1182600	1043600	1070500	1049800	1323900	1236100	1260400	1079400	1082300	1050300	1201200	1046100	1070300	1028800	964570	976760	1479800	1476700	1532300
Capana02g000319	DPE2_ARATH 4-alpha-glucanotransferase DPE2 OS=Arabidopsis thaliana GN=DPE2 PE=1 SV=1	DPE2	72.64	36.2	271	16	16	1541100	1542300	1514700	1579400	1522800	1575800	1767200	1759600	1688800	958830	1032100	978620	1478100	1503400	1496400	1487100	1451300	1471100	1421800	1379500	1404100	538280	549540	559630
Capana02g000320	DPE2_ORYSJ 4-alpha-glucanotransferase DPE2 OS=Oryza sativa subsp. japonica GN=DPE2 PE=2 SV=1	DPE2	13.615	28.8	47	2	2	480290	516040	500490	442200	464210	496120	517330	565230	557900	377240	346180	389790	536010	541080	566050	475650	524300	513830	477550	508060	459680	0	0	139030
Capana02g000325	Putative UPF0664 stress-induced protein C29B12.11c-like	---	24.684	15.1	4	3	3	0	34335	0	0	0	0	0	0	0	0	0	0	0	33189	0	0	0	0	0	0	0	0	0	50291
Capana02g000332	CDPK2_ORYSJ Calcium-dependent protein kinase isoform 2 OS=Oryza sativa subsp. japonica GN=CPK2 PE=2 SV=2	CPK2	57.936	5.9	0	2	1	0	0	0	0	0	0	0	0	0	0	0	0	0	0	0	0	0	0	0	0	0	0	0	0
Capana02g000334	P2A09_ARATH Protein PHLOEM PROTEIN 2-LIKE A9 OS=Arabidopsis thaliana GN=PP2A9 PE=2 SV=1	PP2A9	14.647	14.3	4	1	1	0	0	0	0	0	0	0	0	0	0	0	0	0	0	0	0	0	0	0	0	0	0	13428	0
Capana02g000339	DIM_PEA Delta(24)-sterol reductase OS=Pisum sativum GN=DIM PE=1 SV=1	DIM	67.268	45.5	246	20	19	1386800	1258600	1267500	1196300	1213200	1169300	1157200	1138700	1143500	1178700	1228100	1189500	931440	907270	950460	1110400	1011400	1023400	1038600	1037300	1071300	535910	566380	633620
Capana02g000344	IF62_ARATH Eukaryotic translation initiation factor 6-2 OS=Arabidopsis thaliana GN=EIF6-2 PE=2 SV=1	EIF6-2	26.394	22.4	33	4	4	273380	263200	296790	148550	328530	264990	246340	220590	250110	327110	357180	283200	257220	220000	247720	289880	134840	244970	225500	278080	232740	262220	186180	244750
Capana02g000363	SAC1A_DANRE Phosphatidylinositide phosphatase SAC1-A OS=Danio rerio GN=sacm1la PE=2 SV=1	sacm1la	23.1	31.8	35	4	4	105170	90728	99870	107730	107130	102010	59412	58239	62007	77156	76161	71623	94148	94203	86980	93760	93580	94742	64117	66998	65303	0	44329	51030
Capana02g000364	SAC1_MOUSE Phosphatidylinositide phosphatase SAC1 OS=Mus musculus GN=Sacm1l PE=2 SV=1	Sacm1l	32.631	24.2	61	5	3	129160	107730	112960	109250	111180	113670	82327	79790	89274	65854	71122	69662	117440	112350	115190	90964	95398	95951	98479	87790	76508	63359	60100	68414
Capana02g000368	HNRPF_MACFA Heterogeneous nuclear ribonucleoprotein F OS=Macaca fascicularis GN=HNRNPF PE=2 SV=3	HNRNPF	29.609	15.5	8	3	3	0	31523	23357	0	0	0	47539	0	0	115880	0	0	0	0	0	106300	0	0	0	165880	0	0	164090	0
Capana02g000396	AGD12_ARATH ADP-ribosylation factor GTPase-activating protein AGD12 OS=Arabidopsis thaliana GN=AGD12 PE=1 SV=1	AGD12	17.423	26.3	20	2	2	0	39610	0	0	0	0	0	0	0	0	0	0	0	0	0	0	0	0	53417	0	0	0	0	0
Capana02g000412	U2A2B_NICPL Splicing factor U2af large subunit B OS=Nicotiana plumbaginifolia GN=U2AF65B PE=2 SV=1	U2AF65B	52.557	11.6	5	4	2	0	0	0	0	0	0	0	0	0	0	0	0	0	0	0	0	0	16051	0	0	0	0	0	0
Capana02g000414	PP352_ARATH Pentatricopeptide repeat-containing protein At4g36680, mitochondrial OS=Arabidopsis thaliana GN=At4g36680 PE=1 SV=1	At4g36680	43.913	8.2	11	2	2	35869	16652	15545	17395	12684	17816	0	0	0	0	0	0	13842	0	12296	16849	0	0	0	12734	0	0	0	0
Capana02g000416	YUGF_BACSU Uncharacterized hydrolase yugF OS=Bacillus subtilis GN=yugF PE=3 SV=1	yugF	41.281	51.6	187	12	12	846450	768670	809300	902180	891860	871810	655730	698940	674320	422670	490620	471420	774010	769230	789690	656280	653640	661380	479820	486440	500930	618790	611600	622880
Capana02g000424	NCBP2_ORYSJ Nuclear cap-binding protein subunit 2 OS=Oryza sativa subsp. japonica GN=CBP20 PE=2 SV=1	CBP20	12.25	23.1	25	2	2	114600	103620	109990	107730	116710	123760	0	0	101860	0	0	0	90866	0	0	118270	0	83542	103900	76344	99864	0	0	0
Capana02g000437	ATAD3_XENTR ATPase family AAA domain-containing protein 3 OS=Xenopus tropicalis GN=atad3 PE=2 SV=1	atad3	71.292	11.9	53	6	5	53583	47642	50137	51379	38636	46170	45374	44420	42886	45347	43822	41935	41154	40803	41901	56129	50734	43345	48934	45879	46554	35717	39455	47428
Capana02g000468	PCRA_STAAR ATP-dependent DNA helicase pcrA OS=Staphylococcus aureus (strain MRSA252) GN=pcrA PE=3 SV=1	pcrA	22.709	3.6	0	1	1	0	0	0	0	0	0	0	0	0	0	0	0	0	0	0	0	0	0	0	0	0	0	0	0
Capana02g000472	PSB1_PETHY Proteasome subunit beta type-1 OS=Petunia hybrida GN=PBF1 PE=2 SV=1	PBF1	24.59	66.8	38	11	4	94905	113940	0	191810	97809	0	153030	0	102010	185000	107850	183460	124380	88259	133290	61224	146390	75816	114360	151120	127790	358340	304980	307880
Capana02g000474	PEP_hydrolase domain-containing protein	---	80.332	15.3	25	7	7	67657	71084	62114	74611	56489	69249	41586	48445	38245	36199	40935	39720	39108	26534	0	46770	36527	28962	30853	27167	0	0	27840	0
Capana02g000483	D2HDH_ARATH D-2-hydroxyglutarate dehydrogenase, mitochondrial OS=Arabidopsis thaliana GN=D2HGDH PE=1 SV=3	D2HGDH	51.979	2.8	8	1	1	0	0	0	0	0	0	0	0	0	0	0	0	0	0	0	0	0	0	0	0	0	0	0	2976
Capana02g000488	KIF11_DICDI Kinesin-related protein 11 OS=Dictyostelium discoideum GN=kif11 PE=3 SV=1	kif11	114.4	0.9	0	1	1	0	0	0	0	0	0	0	0	0	0	0	0	0	0	0	0	0	0	0	0	0	0	0	0
Capana02g000489	ALFC2_ARATH Probable fructose-bisphosphate aldolase 2, chloroplastic OS=Arabidopsis thaliana GN=FBA2 PE=1 SV=2	FBA2	38.623	62	375	22	12	5052900	5169700	4932900	5386400	5237700	5176500	5679100	5426700	5758300	5762300	5611500	5358500	5843400	6008500	5804600	5038900	5375000	5179100	4917900	5217200	5405100	8683800	8446800	8057900
Capana02g000490	Putative dnaJ, mitochondrial-like	---	30.113	10.4	44	2	2	148240	173120	166440	167660	163970	164280	160150	183500	172120	154200	162110	142390	173410	161030	168500	179930	179920	157220	158260	163810	161970	155860	144770	159480
Capana02g000503	HNRPQ_MOUSE Heterogeneous nuclear ribonucleoprotein Q OS=Mus musculus GN=Syncrip PE=1 SV=2	Syncrip	127.52	4.9	12	4	4	25546	44714	0	39839	44951	26295	34711	47680	48552	24789	0	43176	21382	41517	0	0	0	32643	56216	57705	39985	0	0	0
Capana02g000506	SMD3_XENLA Small nuclear ribonucleoprotein Sm D3 OS=Xenopus laevis GN=snrpd3 PE=2 SV=1	snrpd3	16.406	37.8	101	4	4	347810	336490	332930	423910	435980	426830	223210	226420	230710	253480	253970	240530	304660	305780	306080	293290	281650	299460	197790	196220	200070	379380	396560	404190
Capana02g000526	CCZ1_NEMVE Vacuolar fusion protein CCZ1 homolog OS=Nematostella vectensis GN=v1g238755 PE=3 SV=1	v1g238755	47.162	14.6	25	4	3	34744	30539	30387	38675	41718	27796	22914	28969	19970	0	23421	21345	39394	24989	28152	41028	24484	33473	21247	0	27435	26591	16976	20191
Capana02g000540	MGLL_HUMAN Monoglyceride lipase OS=Homo sapiens GN=MGLL PE=1 SV=2	MGLL	32.193	23.7	32	5	5	47475	40476	47135	38020	43605	53172	67962	47186	44933	37632	38750	39635	43329	46036	43483	32697	46418	43439	34476	43288	0	0	32045	34964
Capana02g000541	RBS_CAPAN Ribulose bisphosphate carboxylase small chain, chloroplastic OS=Capsicum annuum GN=RBCS PE=2 SV=1	RBCS	20.485	70	1739	21	4	69207000	66520000	67850000	71102000	70170000	71399000	72964000	73302000	72249000	77499000	80208000	77486000	68475000	67684000	70210000	56936000	57285000	60224000	59888000	58239000	59669000	82063000	84521000	81022000
Capana02g000549	RAF2A_ARATH Ras-related protein RABF2a OS=Arabidopsis thaliana GN=RABF2A PE=1 SV=1	RABF2A	16.461	26.5	4	3	1	0	0	0	0	0	0	0	0	0	0	0	0	0	0	0	0	0	0	0	0	0	0	0	21382
Capana02g000552	14334_SOLLC 14-3-3 protein 4 OS=Solanum lycopersicum GN=TFT4 PE=2 SV=1	TFT4	24.905	41.6	96	8	5	469780	453670	489810	425630	398460	386730	439350	427560	447070	590490	554440	576820	560210	530580	552340	581680	577910	580170	612730	606680	574200	434310	336750	397540
Capana02g000557	MGN_ORYSJ Protein mago nashi homolog OS=Oryza sativa subsp. japonica GN=Os12g0287200 PE=2 SV=2	Os12g0287200	25.946	27.1	61	5	5	387360	351170	316470	376170	343950	355600	251500	230600	263150	318730	330030	276820	358150	342530	362000	363790	340380	343400	306270	297480	290800	486260	563780	530290
Capana02g000559	RAC1_ARATH Rac-like GTP-binding protein ARAC1 OS=Arabidopsis thaliana GN=ARAC1 PE=2 SV=1	ARAC1	21.478	17.3	17	2	2	49134	47767	0	44800	51930	46632	0	0	0	0	34695	0	47399	0	43929	42141	62015	0	0	0	0	55307	0	0
Capana02g000567	RD23C_ARATH Putative DNA repair protein RAD23-3 OS=Arabidopsis thaliana GN=RAD23-3 PE=2 SV=2	RAD23-3	43.721	35	193	9	6	1040100	931940	938270	985060	991630	994510	925620	963860	940240	1192300	1176500	1249000	860650	834920	844580	922660	841730	821140	1014400	1044700	1086300	1269000	1416000	1357900
Capana02g000618	MDHG_CITLA Malate dehydrogenase, glyoxysomal OS=Citrullus lanatus PE=1 SV=1	---	37.334	53.2	63	10	7	121540	126380	117950	129660	134490	141290	116640	123420	111130	140870	133340	134280	120500	124500	116970	115650	112500	118340	89568	97241	100460	175240	186030	175440
Capana02g000619	U308_ARATH UPF0308 protein At2g37240, chloroplastic OS=Arabidopsis thaliana GN=At2g37240 PE=2 SV=2	At2g37240	28.303	39.4	161	7	7	381840	408390	384160	370150	399090	390180	470110	468860	468070	330520	343510	343450	384880	406760	412470	310120	337360	344680	426860	421320	450380	485870	456070	433640
Capana02g000649	RSBQ_BACSU Sigma factor sigB regulation protein rsbQ OS=Bacillus subtilis GN=rsbQ PE=1 SV=1	rsbQ	30.338	65.3	334	14	14	3796500	3698400	3660900	3741000	3691000	3698100	3409900	3466200	3594400	2852500	2839000	2774000	3309500	3381200	3373100	3032400	3001200	2899800	2680300	2666200	2696400	2235300	2319900	2417800
Capana02g000662	CSK2A_MAIZE Casein kinase II subunit alpha OS=Zea mays GN=ACK2 PE=1 SV=1	ACK2	48.473	32.5	95	10	6	191710	184930	194370	206640	197580	198720	159630	146200	156950	159710	151080	153460	169640	176460	179050	189540	180550	138410	149950	132180	128870	157730	186050	191780
Capana02g000666	ACA2_ARATH Calcium-transporting ATPase 2, plasma membrane-type OS=Arabidopsis thaliana GN=ACA2 PE=1 SV=1	ACA2	107.46	12.6	58	7	6	132410	148820	160630	134410	125980	136610	152840	168380	156890	155400	162700	141660	163140	163000	158340	132790	179820	170330	171310	172750	189020	61997	60661	0
Capana02g000667	RL261_ARATH 60S ribosomal protein L26-1 OS=Arabidopsis thaliana GN=RPL26A PE=2 SV=2	RPL26A	16.793	35.6	76	5	2	783880	818130	778710	801680	788370	838810	662420	667160	666450	590110	560860	625960	750540	734620	734250	702350	717700	761170	691320	696740	675420	396640	351990	358890
Capana02g000669	ARL8A_CHICK ADP-ribosylation factor-like protein 8A OS=Gallus gallus GN=ARL8A PE=2 SV=1	ARL8A	22.606	45.5	134	7	3	337770	300080	299420	391430	361100	345360	275630	308110	279110	229950	213710	226590	291100	296060	297210	314300	298820	291890	285300	246700	235180	329180	343970	303790
Capana02g000690	Putative ovule protein (Fragment)	---	54.962	32	144	11	11	1148900	1089300	1128600	1082500	1122800	1154000	1226000	1214700	1223600	1034100	1092000	1070300	1473500	1507000	1492400	1388200	1410200	1444800	1199600	1206700	1281700	2049200	2076800	1944600
Capana02g000695	CBSX1_ARATH CBS domain-containing protein CBSX1, chloroplastic OS=Arabidopsis thaliana GN=CBSX1 PE=1 SV=2	CBSX1	25.201	24.9	33	4	3	229290	224690	205460	207350	192850	196870	224340	218490	237070	248530	239540	221110	0	0	0	0	0	0	0	0	0	0	0	0
Capana02g000702	EXOC5_ARATH Exocyst complex component 5 OS=Arabidopsis thaliana GN=SEC10 PE=2 SV=2	SEC10	32.716	35.5	69	6	6	155910	134700	134670	120590	107050	96534	105330	94069	114100	84510	71270	86993	91237	85715	91638	131350	112410	103280	92092	96220	102580	23449	32274	20428
Capana02g000703	EXOC5_ARATH Exocyst complex component 5 OS=Arabidopsis thaliana GN=SEC10 PE=2 SV=2	SEC10	61.372	24.9	71	8	8	239250	233930	229770	177790	188820	168250	186560	170020	211130	154640	140220	184010	196760	174180	180130	196750	207590	183130	182610	178720	201720	96002	156130	117210
Capana02g000737	ASOL_TOBAC L-ascorbate oxidase homolog OS=Nicotiana tabacum PE=2 SV=1	---	59.543	28.8	88	11	7	162900	168450	185910	220640	208600	221700	45056	77104	82554	150190	149850	138170	118830	122330	107020	50082	74964	83545	56307	54301	53633	245780	232570	214390
Capana02g000741	SYLC_CAEEL Leucine--tRNA ligase OS=Caenorhabditis elegans GN=lrs-1 PE=2 SV=2	lrs-1	116.37	30.7	181	23	16	494160	461650	462200	465150	461740	392140	454850	429330	462590	309320	362730	344300	343210	428620	366170	412020	341100	374280	405570	359220	379310	126710	112680	133210
Capana02g000764	PSBO_SOLLC Oxygen-evolving enhancer protein 1, chloroplastic OS=Solanum lycopersicum GN=PSBO PE=2 SV=2	PSBO	34.958	57.1	132	21	12	7068600	7696100	7757100	6496900	7131200	7500800	9713500	9804400	9997800	11043000	11039000	10898000	9229800	9256200	9244900	8007900	8353900	8608500	9865000	9370400	9746700	15692000	14412000	14225000
Capana02g000772	ST14_SOLTU STS14 protein OS=Solanum tuberosum GN=STS14 PE=2 SV=1	STS14	19.7	42.2	99	6	6	538830	487430	473230	504120	517750	512470	434610	432420	432730	625170	648410	647370	426360	418590	448010	461470	411700	440460	491310	507070	480890	1004500	1013500	948270
Capana02g000776	ULP_PROTEASE domain-containing protein	---	38.915	3.3	0	1	1	0	0	0	0	0	0	0	0	0	0	0	0	0	0	0	0	0	0	0	0	0	0	0	0
Capana02g000803	WIT1_ARATH WPP domain-interacting tail-anchored protein 1 OS=Arabidopsis thaliana GN=WIT1 PE=1 SV=2	WIT1	69.159	10	13	4	4	36008	0	0	0	21795	0	0	19998	40362	34051	0	0	0	29676	0	53299	40809	0	44830	44670	32176	0	0	0
Capana02g000804	S38A3_RAT Sodium-coupled neutral amino acid transporter 3 OS=Rattus norvegicus GN=Slc38a3 PE=2 SV=1	Slc38a3	50.795	8.1	17	3	3	40636	42581	41650	48454	33239	46110	44375	40749	48507	30751	35614	40454	0	42095	0	45839	38019	44910	0	0	0	65937	0	0
Capana02g000819	Villin-1 like	---	14.343	27.8	19	2	2	0	0	33006	25314	43298	43082	39304	0	0	122370	121540	26908	28634	0	11654	33886	0	0	0	29553	0	20865	0	0
Capana02g000821	G3BP_SCHPO Putative G3BP-like protein OS=Schizosaccharomyces pombe (strain 972 / ATCC 24843) GN=nxt3 PE=1 SV=1	nxt3	53.615	16.8	39	4	4	187200	216630	227890	225300	223540	234290	0	244600	237970	254850	243680	361780	0	235180	252050	217580	232960	218310	319190	357000	285250	223370	194150	185280
Capana02g000828	coilin-like	---	72.996	2	16	1	1	0	0	0	0	0	0	0	0	0	0	0	0	0	0	0	0	0	0	0	0	0	0	0	5015.7
Capana02g000833	METB_ARATH Cystathionine gamma-synthase, chloroplastic OS=Arabidopsis thaliana GN=CGS1 PE=2 SV=3	CGS1	58.56	39.3	281	15	12	954420	975600	970380	1024100	1020400	1036300	994170	983370	991930	950980	917870	918130	883950	918480	883040	783600	751520	768390	817010	741620	745690	914330	922550	918340
Capana02g000837	Y4837_ARATH KH domain-containing protein At4g18375 OS=Arabidopsis thaliana GN=At4g18375 PE=2 SV=1	At4g18375	58.424	43	309	14	13	1553400	1566600	1610400	1598500	1652700	1625300	1430900	1402700	1458000	1403900	1423900	1436100	1593700	1601100	1578500	1550900	1554100	1480100	1557300	1572200	1537200	1393700	1488200	1494400
Capana02g000850	AKR2_ORYSI Probable aldo-keto reductase 2 OS=Oryza sativa subsp. indica GN=OsI_15387 PE=3 SV=1	OsI_15387	38.088	62.4	280	17	9	1334200	1277100	1269700	1318200	1329500	1369100	1454400	1504100	1450500	1148100	1154500	1157500	1299000	1316300	1348000	1200700	1184200	1247500	1259500	1311100	1269500	1050100	1046500	1042000
Capana02g000862	CYF_ATRBE Apocytochrome f OS=Atropa belladonna GN=petA PE=3 SV=1	petA	34.952	69.8	635	21	21	20025000	22676000	22638000	24152000	24843000	25557000	29525000	28995000	29712000	28084000	26583000	27010000	27106000	27512000	27595000	24554000	25760000	27052000	25480000	26156000	25725000	38610000	37835000	38052000
Capana02g000864	ATPA_TOBAC ATP synthase subunit alpha, chloroplastic OS=Nicotiana tabacum GN=atpA PE=2 SV=2	atpA	21.575	34.5	3	7	1	0	0	0	0	0	0	0	0	0	0	0	0	0	0	0	0	0	0	0	0	0	0	4593	0
Capana02g000868	AMY1_HORVU Alpha-amylase type A isozyme OS=Hordeum vulgare GN=AMY1.1 PE=1 SV=1	AMY1.1	94.647	30.1	69	15	15	266250	298300	230300	266870	171290	227550	357900	371770	384680	151660	136840	157790	227230	189320	262290	318730	250680	301810	329950	363870	362960	63487	60279	80674
Capana02g000871	GRP2_ARATH Glycine-rich RNA-binding protein 2, mitochondrial OS=Arabidopsis thaliana GN=GRP2 PE=1 SV=1	GRP2	26.906	28.2	49	3	2	205370	197150	200960	212760	224080	229300	195050	208110	208090	332560	340870	301650	217900	206850	218880	198790	209930	204000	269780	304580	300710	441540	385590	406950
Capana02g000880	KIN10_ARATH SNF1-related protein kinase catalytic subunit alpha KIN10 OS=Arabidopsis thaliana GN=KIN10 PE=1 SV=2	KIN10	58.868	25.5	70	10	5	288400	248610	225660	282060	275350	267520	213100	224640	184540	188180	202240	172970	308680	256040	255010	265640	248130	249850	240700	210150	217780	286600	260600	259370
Capana02g000884	EMB30_ARATH Pattern formation protein EMB30 OS=Arabidopsis thaliana GN=EMB30 PE=1 SV=1	EMB30	78.356	4	22	2	2	201230	205890	198270	206660	196650	204530	211430	0	211060	210530	207220	204350	198250	189970	201240	181900	193100	0	196600	195130	197190	236740	238250	239080
Capana02g000893	Y1773_CYTH3 UPF0301 protein CHU_1773 OS=Cytophaga hutchinsonii (strain ATCC 33406 / NCIMB 9469) GN=CHU_1773 PE=3 SV=1	CHU_1773	33.423	18.6	13	4	1	0	0	0	24087	30096	0	0	0	0	0	35629	34727	0	0	0	0	0	0	0	0	0	0	0	0
Capana02g000894	Y637_PELLD UPF0301 protein Plut_0637 OS=Pelodictyon luteolum (strain DSM 273) GN=Plut_0637 PE=3 SV=1	Plut_0637	33.443	18.6	37	4	1	112440	90270	98380	196370	194430	163980	186450	151680	165540	158770	158500	144030	93859	93646	90171	168170	162020	156950	176940	166730	177200	158360	178900	220920
Capana02g000901	NDUS3_SOLTU NADH dehydrogenase [ubiquinone] iron-sulfur protein 3 OS=Solanum tuberosum GN=NAD9 PE=1 SV=3	NAD9	19.939	20.7	50	3	3	283440	261080	259080	294010	305150	277040	265080	237190	259920	249630	244030	230450	282230	254480	283990	285370	279850	280070	199120	201180	244910	394720	367260	419690
Capana02g000903	DEGP8_ARATH Protease Do-like 8, chloroplastic OS=Arabidopsis thaliana GN=DEGP8 PE=1 SV=1	DEGP8	45.224	22.2	74	5	4	348570	354960	313980	325350	317440	331830	427170	434960	426800	477560	542140	494230	343390	350980	360400	375810	346560	367210	387000	382650	366190	687260	694830	693980
Capana02g000909	Y4466_ARATH ZF-HD homeobox protein At4g24660 OS=Arabidopsis thaliana GN=At4g24660 PE=1 SV=1	At4g24660	39.682	21.8	13	5	5	0	0	0	21804	0	24773	0	0	0	0	33769	0	0	0	0	35084	34106	0	25520	0	0	31520	44877	45694
Capana02g000933	VDAC1_SOLTU Mitochondrial outer membrane protein porin of 34 kDa OS=Solanum tuberosum PE=1 SV=2	---	29.618	54.7	179	12	12	3294300	3159500	3072600	3242900	3436000	3301400	3549500	3628900	3492400	4612500	4391800	4456800	3468900	3465400	3457600	3518200	3439100	3661900	3903600	3818400	3892300	6267600	6408300	6689100
Capana02g000934	HIR1_ARATH Hypersensitive-induced response protein 1 OS=Arabidopsis thaliana GN=HIR1 PE=1 SV=1	HIR1	31.816	12.8	32	2	1	177350	145430	125210	157170	163990	149110	107030	112230	94467	138140	127870	133730	88549	106570	104810	79162	0	55781	0	77605	72761	135600	127520	107050
Capana02g000940	P4HA1_RAT Prolyl 4-hydroxylase subunit alpha-1 OS=Rattus norvegicus GN=P4ha1 PE=2 SV=2	P4ha1	31.424	26.8	76	5	5	105780	95774	97007	103500	98580	97266	108400	108780	101350	107440	100520	103610	85094	92085	90693	98143	97679	87307	88104	92218	91863	122710	132410	130960
Capana02g000952	GSTX1_TOBAC Probable glutathione S-transferase OS=Nicotiana tabacum PE=2 SV=1	---	25.677	41.1	99	9	5	495790	485140	441900	473940	472290	475400	541260	536260	549670	452920	444120	434490	390360	384070	352380	380420	384090	363160	346090	299330	335540	352380	375260	352610
Capana02g000986	CAHC_TOBAC Carbonic anhydrase, chloroplastic OS=Nicotiana tabacum PE=2 SV=1	---	26.755	21.8	48	4	2	49921	57116	59533	50420	68297	0	106390	0	105490	129460	129250	112830	109240	99520	117590	194580	191050	200850	135460	136520	120990	292690	216220	279670
Capana02g001002	GPAA1_MOUSE Glycosylphosphatidylinositol anchor attachment 1 protein OS=Mus musculus GN=Gpaa1 PE=1 SV=3	Gpaa1	77.696	5.7	38	2	2	546140	0	552240	493570	676180	656150	0	622030	0	0	730200	0	605950	677230	714340	617010	607700	0	579700	0	670240	751410	864710	877000
Capana02g001004	AIM32_DEBHA Altered inheritance of mitochondria protein 32 OS=Debaryomyces hansenii (strain ATCC 36239 / CBS 767 / JCM 1990 / NBRC 0083 / IGC 2968) GN=AIM32 PE=3 SV=2	AIM32	21.507	24.9	64	3	3	199890	175950	180890	192460	187130	188590	169860	171250	181700	156910	154090	162990	137850	138240	145350	168420	167380	164530	137860	130140	142000	177670	185280	191020
Capana02g001007	AAPC_CENCI Putative glucose-6-phosphate 1-epimerase OS=Cenchrus ciliaris PE=2 SV=1	---	39.006	47.2	93	9	9	175700	174920	164300	196370	172530	185350	141500	129440	122560	187380	200840	195630	205320	199390	205490	210030	175410	144330	171640	146990	162560	234410	251190	235610
Capana02g001016	GPDA_CUPLA Glycerol-3-phosphate dehydrogenase [NAD(+)] OS=Cuphea lanceolata GN=GPDH PE=2 SV=1	GPDH	40.744	21.6	36	5	5	51281	67243	63797	77222	72907	71837	54142	55577	43478	39537	41045	52023	0	79551	60066	45472	35205	52323	72328	66666	72008	85305	80562	54188
Capana02g001025	2A5N_ARATH Serine/threonine protein phosphatase 2A 59 kDa regulatory subunit B' eta isoform OS=Arabidopsis thaliana GN=B'ETA PE=2 SV=1	B'ETA	60.233	19.3	60	8	7	109110	99468	108920	101190	102860	116200	132100	121390	124340	74268	69347	79252	113660	100120	99107	111210	128240	126060	123990	114290	113870	35169	44504	30184
Capana02g001029	SNF12_ARATH SWI/SNF complex component SNF12 homolog OS=Arabidopsis thaliana GN=At5g14170 PE=1 SV=1	At5g14170	59.83	14.9	10	5	5	111650	134320	95580	78491	68881	70006	56102	48799	50727	52159	55395	0	77203	76569	77451	59088	74735	70217	0	64760	61232	65266	54099	66972
Capana02g001031	CLCB_ARATH Chloride channel protein CLC-b OS=Arabidopsis thaliana GN=CLC-B PE=1 SV=1	CLC-B	86.325	10.1	5	4	4	0	22057	0	31108	22667	0	0	0	0	0	0	0	19246	15948	0	16047	0	0	0	0	0	0	0	0
Capana02g001038	SETD3_CALJA Histone-lysine N-methyltransferase setd3 OS=Callithrix jacchus GN=SETD3 PE=3 SV=2	SETD3	55.985	42.2	160	12	12	878970	885010	925130	962060	948220	920840	980100	952930	994080	818910	766480	788990	853970	879790	900940	879120	881650	887610	788080	822980	799080	710050	662450	633030
Capana02g001050	TOM20_SOLTU Mitochondrial import receptor subunit TOM20 OS=Solanum tuberosum GN=TOM20 PE=1 SV=1	TOM20	22.901	62.9	146	8	7	1152400	1051100	984970	1185600	1128200	1064600	979900	981270	988150	912810	915990	845440	1035600	996030	998790	1220900	1161300	1175100	1133900	1067400	1049000	1201400	1214600	1217000
Capana02g001051	protein NUCLEAR FUSION DEFECTIVE 4-like	---	64.955	11.8	38	4	3	88405	89104	117110	120830	94365	109910	167240	168430	174650	104340	124640	124170	117510	84792	79514	83227	107660	111100	99768	103860	133690	112740	126890	118240
Capana02g001052	NTF2_ARATH Nuclear transport factor 2 OS=Arabidopsis thaliana GN=NTF2 PE=2 SV=1	NTF2	19.165	56.1	115	6	5	750980	770010	704440	809710	807000	764660	792640	798420	778310	1001100	1061000	1021800	747750	787860	770230	693630	692790	707730	788340	824940	850760	1352300	1347200	1268800
Capana02g001057	AB11I_ARATH ABC transporter I family member 11, chloroplastic OS=Arabidopsis thaliana GN=ABCI11 PE=2 SV=1	ABCI11	24.427	20.5	3	3	3	0	0	0	0	0	0	0	0	0	0	36902	36448	0	0	0	0	0	0	0	0	0	0	0	0
Capana02g001065	Putative synechocystis YCF37-like	---	16.561	12.1	45	3	3	1908900	1433800	950310	1168800	1395900	0	1289300	1287000	1180800	2134800	2022200	1188700	978620	1100200	891100	1359500	1264800	1647900	2049500	350750	1063200	2737600	2266500	2796700
Capana02g001070	MUB4_ARATH Membrane-anchored ubiquitin-fold protein 4 OS=Arabidopsis thaliana GN=MUB4 PE=1 SV=1	MUB4	14.463	15.2	3	2	2	0	0	0	0	0	0	0	0	0	0	0	0	0	0	0	0	0	0	0	0	0	49948	0	0
Capana02g001074	DGAT2_ARATH Diacylglycerol O-acyltransferase 2 OS=Arabidopsis thaliana GN=DGAT2 PE=2 SV=1	DGAT2	37.152	15.1	45	4	4	42279	48301	43723	49186	43940	45398	36906	40137	40935	37826	0	32561	56133	54457	71358	68711	62547	60806	41258	40219	40763	56242	72870	66389
Capana02g001077	Putative ovule protein	---	19.761	13.2	43	4	4	403520	353990	322030	402030	352780	378660	392490	387940	400620	387910	380060	360040	336800	306910	330100	468340	360030	383170	335180	301690	343050	484160	545840	588140
Capana02g001083	SUBL_ARATH Subtilisin-like protease OS=Arabidopsis thaliana GN=ARA12 PE=1 SV=1	ARA12	79.537	5.7	1	2	2	0	0	0	0	0	0	0	0	0	0	0	0	0	0	0	0	0	77592	0	0	0	0	0	0
Capana02g001104	HEM4 domain-containing protein	---	33.001	30.4	33	5	5	630690	614120	658520	622970	614590	636250	667820	677400	636120	601680	634910	593780	759870	749650	750050	605330	746720	783760	683630	668180	683040	1004900	935630	881920
Capana02g001122	4CLLA_ARATH 4-coumarate--CoA ligase-like 10 OS=Arabidopsis thaliana GN=4CLL10 PE=2 SV=1	4CLL10	56.37	31	42	9	9	0	0	15348	0	30582	17160	23155	18568	18295	250070	294420	262230	32673	21873	20686	29948	37733	31795	16882	22283	21073	425910	282180	385320
Capana02g001130	SPI1_SOLTU Serine protease inhibitor 1 OS=Solanum tuberosum PE=1 SV=2	---	27.421	26.6	71	5	5	882250	508930	815690	736070	761610	687390	759130	802270	799730	969070	896790	981770	1255600	1380900	1368600	1325300	1139100	1173600	1159400	1142000	1141400	2297300	2286200	2214900
Capana02g001139	VATF_ARATH V-type proton ATPase subunit F OS=Arabidopsis thaliana GN=VHA-F PE=2 SV=1	VHA-F	14.575	47.7	115	5	5	624480	608460	589230	627890	619230	627220	538710	556690	553350	790700	795520	800800	579190	576210	587330	608060	608560	623740	615260	620270	582650	789750	783770	820050
Capana02g001142	SNUT2_MOUSE U4/U6.U5 tri-snRNP-associated protein 2 OS=Mus musculus GN=Usp39 PE=2 SV=2	Usp39	64.342	16.4	40	6	6	82791	89255	79045	52927	80624	64018	55821	63442	71063	71235	65054	62030	60802	50611	56299	62904	68187	61892	90805	72956	75898	36575	0	31136
Capana02g001150	UAP1_ARATH Probable UDP-N-acetylglucosamine pyrophosphorylase OS=Arabidopsis thaliana GN=At2g35020 PE=2 SV=1	At2g35020	53.923	38.8	82	11	11	199320	162490	162580	189980	187700	168050	147260	117370	140140	132790	115870	133140	160370	171510	146760	178510	156580	158530	155150	167530	142680	154710	155550	146050
Capana02g001157	CTR1_ARATH Serine/threonine-protein kinase CTR1 OS=Arabidopsis thaliana GN=CTR1 PE=1 SV=1	CTR1	140.4	15.9	148	13	12	440220	407890	420400	360370	343070	358690	314560	289480	284690	323280	299350	319190	325300	357760	300880	328480	312430	293300	322240	329330	277570	205390	218420	220390
Capana02g001160	CPNA2_ARATH Chaperonin 60 subunit alpha 2, chloroplastic OS=Arabidopsis thaliana GN=CPN60A2 PE=2 SV=1	CPN60A2	62.134	10.1	51	3	3	224830	209330	195360	202020	203450	206670	181940	191940	204030	170520	177400	149010	172080	183660	195720	229810	226630	198670	198530	201700	219050	142290	152950	165130
Capana02g001162	NCKP1_ARATH Protein NAP1 OS=Arabidopsis thaliana GN=NAP1 PE=1 SV=2	NAP1	124.19	3.8	19	2	2	23222	25987	25212	13327	18904	0	0	0	23088	0	17574	0	0	19090	19884	25889	0	0	27825	26691	23274	0	0	0
Capana02g001163	LVSE_DICDI BEACH domain-containing protein lvsE OS=Dictyostelium discoideum GN=lvsE PE=4 SV=1	lvsE	18.662	23.3	23	2	2	80940	0	68304	70057	60724	54911	63439	55658	55495	0	18952	43871	0	35934	56303	46585	0	47783	43092	38638	31857	0	44506	41808
Capana02g001165	ZB14_MAIZE 14 kDa zinc-binding protein OS=Zea mays GN=ZBP14 PE=1 SV=1	ZBP14	19.345	44.4	122	5	5	588780	594320	572510	638400	607120	624730	954730	945870	951250	1100100	1107700	1093200	459500	474060	476940	662230	628350	627200	931110	936930	925100	1201400	1191800	1149000
Capana02g001187	IMPL1_ARATH Phosphatase IMPL1, chloroplastic OS=Arabidopsis thaliana GN=IMPL1 PE=1 SV=2	IMPL1	40.112	52.3	217	12	12	1090300	1034400	1091000	1005200	1055800	912150	1171900	1166800	1193800	1371900	1429200	1318400	1037100	1018300	1092500	1119200	1154200	1150800	1034500	1072900	938870	1492400	1567600	1496800
Capana02g001194	OSGEP_DICDI Probable tRNA threonylcarbamoyladenosine biosynthesis protein osgep OS=Dictyostelium discoideum GN=osgep PE=3 SV=1	osgep	20.802	34.9	71	4	4	237170	201240	207770	233890	227120	203150	145170	154880	157280	141590	136990	156830	221480	238590	221100	217530	208190	197500	184560	194770	183100	287820	275930	293340
Capana02g001195	GCSH_FLAAN Glycine cleavage system H protein, mitochondrial OS=Flaveria anomala GN=GDCSH PE=2 SV=1	GDCSH	16.88	31.8	11	4	4	82633	117900	125750	109970	95316	110100	0	0	76161	137970	133230	139750	79284	0	0	0	0	0	121520	0	0	176510	0	200470
Capana02g001203	P5CR_ACTCH Pyrroline-5-carboxylate reductase OS=Actinidia chinensis PE=2 SV=1	---	29.301	41.8	81	7	7	364890	334850	307540	354890	356570	365770	370870	346630	357990	462910	461440	460250	110700	52166	62344	112720	93609	77546	75952	85692	85136	146860	132830	184060
Capana02g001206	TRMB_ARATH tRNA (guanine-N(7)-)-methyltransferase OS=Arabidopsis thaliana GN=At5g24840 PE=2 SV=1	At5g24840	27.828	15.6	7	2	2	25228	0	21774	0	29267	0	0	0	0	0	0	14007	0	0	0	0	0	0	0	0	21492	30459	0	0
Capana02g001213	NU155_RAT Nuclear pore complex protein Nup155 OS=Rattus norvegicus GN=Nup155 PE=1 SV=1	Nup155	142.37	18.3	124	15	6	239620	244860	230270	200920	208250	188390	236180	239990	241140	198200	198520	194780	135750	132910	153690	217160	225870	208440	242470	261100	246300	48199	47481	36659
Capana02g001214	NU155_MOUSE Nuclear pore complex protein Nup155 OS=Mus musculus GN=Nup155 PE=2 SV=1	Nup155	18.184	21.5	6	3	3	0	0	17579	0	17077	0	0	0	0	0	0	0	0	0	0	0	0	0	0	0	0	0	0	0
Capana02g001236	GST C-terminal domain-containing protein	---	41.43	42.7	166	12	12	514320	469310	438420	450630	444410	436270	402510	427930	473930	425140	391130	378090	833270	826510	846000	849310	878390	842240	734880	757560	733870	909600	871670	908540
Capana02g001258	CATB_MACFA Cathepsin B OS=Macaca fascicularis GN=CTSB PE=2 SV=1	CTSB	39.508	39	84	8	7	765140	718560	685460	775270	743440	641840	565510	597230	620410	658050	788430	804720	99092	102890	170470	103080	115860	141400	117800	109490	100990	208830	240130	258620
Capana02g001259	ZPR1_MOUSE Zinc finger protein ZPR1 OS=Mus musculus GN=Znf259 PE=1 SV=1	Znf259	55.123	8.1	24	3	3	46778	51791	51867	43985	36614	0	39332	44315	44187	36586	48313	37786	27588	31998	34286	35551	17351	31573	41603	41841	94915	20632	32206	0
Capana02g001262	FK171_ARATH Peptidyl-prolyl cis-trans isomerase FKBP17-1, chloroplastic OS=Arabidopsis thaliana GN=FKBP17-1 PE=2 SV=1	FKBP17-1	19.453	17.5	25	2	2	0	0	28657	27583	39487	35983	40835	37905	40389	64032	0	0	36618	0	38428	26286	0	39760	39367	51568	0	109190	72471	70831
Capana02g001263	FK171_ARATH Peptidyl-prolyl cis-trans isomerase FKBP17-1, chloroplastic OS=Arabidopsis thaliana GN=FKBP17-1 PE=2 SV=1	FKBP17-1	13.669	19.7	7	2	2	0	205030	0	0	0	421540	0	0	0	0	0	448360	96132	102840	0	0	0	0	0	0	0	0	116190	0
Capana02g001264	SYLC_HUMAN Leucine--tRNA ligase, cytoplasmic OS=Homo sapiens GN=LARS PE=1 SV=2	LARS	122.75	50.5	596	38	31	2126600	2232200	2220700	2125500	2135800	2158300	2095400	2112300	2161600	1724000	1732000	1764200	2199300	2189700	2239900	2087100	2231100	2213100	2200700	2156700	2189700	994600	973500	1022100
Capana02g001265	VA726_ARATH Putative vesicle-associated membrane protein 726 OS=Arabidopsis thaliana GN=VAMP726 PE=2 SV=2	VAMP726	25.507	16.7	83	4	3	219980	207780	186580	213840	199390	201750	178540	176920	175340	128190	121410	133480	193830	189940	168780	215430	206070	190090	171280	175270	162250	195990	207770	178570
Capana02g001266	TRPX_ARATH Anthranilate synthase component I-2, chloroplastic OS=Arabidopsis thaliana GN=ASA2 PE=2 SV=1	ASA2	66.26	38.4	327	17	17	690170	696000	656530	699880	697930	703060	577340	562640	580140	579540	561990	570400	666090	652920	640620	622250	582750	555170	530580	523010	513090	549200	627300	574830
Capana02g001274	CATB_PONAB Cathepsin B OS=Pongo abelii GN=CTSB PE=2 SV=1	CTSB	39.172	44.3	203	9	8	997150	991630	951480	1037100	1020700	1044300	982690	986640	1012600	1088200	1086000	1111200	1029600	1056000	1066200	1057800	1071300	1077200	997580	999660	1003400	1746000	1788100	1804700
Capana02g001277	CATB_PONAB Cathepsin B OS=Pongo abelii GN=CTSB PE=2 SV=1	CTSB	29.532	3.1	24	1	1	0	0	0	0	0	0	0	0	0	0	0	0	0	0	0	0	0	0	0	0	0	0	0	92967
Capana02g001299	AGO2_ARATH Protein argonaute 2 OS=Arabidopsis thaliana GN=AGO2 PE=1 SV=1	AGO2	112.42	32.1	237	19	19	946140	897530	907980	816030	833400	828020	875000	910550	870960	730010	692240	712890	870210	891500	859220	887980	874220	874430	891790	832720	864690	293310	285850	273100
Capana02g001300	LIN1_LOTJA Putative E3 ubiquitin-protein ligase LIN-1 OS=Lotus japonicus GN=CERBERUS PE=2 SV=2	CERBERUS	113.81	4.9	2	2	2	0	0	0	0	0	0	0	0	0	0	0	0	0	0	0	0	0	0	0	0	0	0	0	19358
Capana02g001309	RAF2A_ARATH Ras-related protein RABF2a OS=Arabidopsis thaliana GN=RABF2A PE=1 SV=1	RABF2A	21.686	34.5	64	5	3	146700	125880	146880	149060	153240	170580	142000	141460	149080	181060	167970	170370	165910	153130	146820	134730	137850	139570	117810	106530	136320	255110	268210	246540
Capana02g001318	haloacid dehalogenase-like hydrolase domain-containing protein At3g48420	---	41.335	40.9	135	9	9	477900	482280	560690	446590	426740	500310	514700	566470	490750	499310	503030	489900	445390	462280	483970	412360	435500	413530	470950	433060	345100	438480	501900	462910
Capana02g001321	PSAF_ARATH Photosystem I reaction center subunit III, chloroplastic OS=Arabidopsis thaliana GN=PSAF PE=1 SV=1	PSAF	25.098	42.4	111	7	7	5475100	5230700	5680900	6597600	6281600	6436700	6862800	6645400	6554500	6153600	6384800	6320300	6740800	7131300	7198200	6326600	6069900	6329800	5823500	6073700	6049000	9069300	9828400	9954900
Capana02g001336	COPE1_ARATH Coatomer subunit epsilon-1 OS=Arabidopsis thaliana GN=At1g30630 PE=2 SV=1	At1g30630	32.008	66.7	238	14	14	1137500	1143800	1129000	1290700	1241500	1244200	977580	992930	972410	1132700	1105400	1140400	1084300	1077800	1128800	1053800	1075000	1069700	1028400	985150	978590	1331300	1364900	1344600
Capana02g001342	RPIA_GLUOX Ribose-5-phosphate isomerase A OS=Gluconobacter oxydans (strain 621H) GN=rpiA PE=3 SV=1	rpiA	39.374	44	160	10	10	412240	445630	417480	342680	361630	372940	562150	563310	581290	512600	533370	530090	436250	453100	452980	466320	448200	475390	584160	590440	583400	431680	380730	388010
Capana02g001344	PHYE_IPONI Phytochrome E OS=Ipomoea nil GN=PHYE PE=2 SV=1	PHYE	14.946	11.1	0	1	1	0	0	0	0	0	0	0	0	0	0	0	0	0	0	0	0	0	0	0	0	0	0	0	0
Capana02g001347	SUBL_ARATH Subtilisin-like protease OS=Arabidopsis thaliana GN=ARA12 PE=1 SV=1	ARA12	91.66	4.8	4	2	2	0	0	0	0	0	0	0	0	0	0	0	0	0	0	0	0	0	0	11099	0	0	0	0	0
Capana02g001348	SNAG_ARATH Gamma-soluble NSF attachment protein OS=Arabidopsis thaliana GN=GSNAP PE=2 SV=1	GSNAP	32.614	31.9	121	8	8	455910	421910	402140	395270	414380	381480	438410	433340	458330	376160	379290	408280	387480	376630	355490	409890	401220	393940	398710	405640	413370	269640	281020	293210
Capana02g001352	RETOL_ARATH Reticuline oxidase-like protein OS=Arabidopsis thaliana GN=At4g20830 PE=1 SV=2	At4g20830	61.206	7.7	18	3	2	59134	51175	60344	56738	92927	41232	51319	0	52557	35858	0	30003	42168	0	47176	43016	0	0	0	0	0	0	0	0
Capana02g001360	EKI2_MOUSE Ethanolamine kinase 2 OS=Mus musculus GN=Etnk2 PE=1 SV=1	Etnk2	45.243	26.6	25	6	6	220460	204490	106310	177150	178210	153900	165340	75208	69906	127170	124140	141180	102740	102280	126910	139570	112990	129680	109390	95463	106190	119440	155420	166740
Capana02g001363	U3IP2_MOUSE U3 small nucleolar RNA-interacting protein 2 OS=Mus musculus GN=Rrp9 PE=1 SV=1	Rrp9	131.1	12.3	68	8	8	162850	131760	132660	133800	122850	121270	171110	174620	154080	125410	105870	131170	119730	109750	110950	158920	149700	148820	234230	154540	176790	52514	51695	58719
Capana02g001364	DR111_ARATH DNA-damage-repair/toleration protein DRT111, chloroplastic OS=Arabidopsis thaliana GN=DRT111 PE=2 SV=2	DRT111	41.3	10.7	41	2	2	67156	113880	116480	75297	56635	74278	0	74577	0	60298	58901	54325	76440	61297	137290	79146	63861	69514	47384	47066	47074	163980	0	61490
Capana02g001365	CXE6_ARATH Probable carboxylesterase 6 OS=Arabidopsis thaliana GN=CXE6 PE=2 SV=1	CXE6	37.154	12.2	4	3	3	0	0	0	0	0	0	0	0	0	18938	0	20064	0	0	0	0	0	0	0	0	0	29710	44347	32192
Capana02g001368	YAB9_SCHPO Uncharacterized membrane protein C2G11.09 OS=Schizosaccharomyces pombe (strain 972 / ATCC 24843) GN=SPAC2G11.09 PE=2 SV=2	SPAC2G11.09	76.541	24	122	13	13	372990	347850	345320	318030	343070	347740	423920	396210	415280	357660	355830	365960	391070	394590	375810	634800	551270	557920	464650	445570	451050	615730	583780	550700
Capana02g001383	FENR2_TOBAC Ferredoxin--NADP reductase, root-type isozyme, chloroplastic OS=Nicotiana tabacum PE=2 SV=1	---	42.166	41.1	184	10	10	838720	793450	820810	868220	849650	808890	768210	811840	775060	952490	894510	862590	729480	716690	727720	723720	693390	673060	735800	718640	707810	1031700	1052000	1113800
Capana02g001384	RLA0_SOYBN 60S acidic ribosomal protein P0 OS=Glycine max PE=2 SV=1	---	43.369	40.2	118	9	9	699040	1066000	1736900	1894200	1900100	2132400	1981600	1806300	1667300	2367100	2518600	2223000	2365600	2069600	2151600	2605300	2916300	2914100	2458100	2431800	2628600	2379500	2240900	2265300
Capana02g001388	MENE_ARATH 2-succinylbenzoate--CoA ligase, chloroplastic/peroxisomal OS=Arabidopsis thaliana GN=AAE14 PE=1 SV=1	AAE14	63.69	11.2	9	4	3	0	109610	77389	122040	0	0	0	69534	0	0	0	79076	105110	0	157280	0	0	96328	0	0	256440	0	0	0
Capana02g001399	Y4294_ARATH Probable LRR receptor-like serine/threonine-protein kinase At4g20940 OS=Arabidopsis thaliana GN=At4g20940 PE=1 SV=1	At4g20940	111.51	11	61	7	7	524640	509220	379150	446170	394310	407670	401710	378790	362040	246960	292950	326960	340320	304420	333330	351220	356010	355160	307490	296450	338020	281640	272420	334620
Capana02g001406	HEN1_ARATH Small RNA 2'-O-methyltransferase OS=Arabidopsis thaliana GN=HEN1 PE=1 SV=1	HEN1	104.06	2.1	0	1	1	0	0	0	0	0	0	0	0	0	0	0	0	0	0	0	0	0	0	0	0	0	0	0	0
Capana02g001426	PATL5_ARATH Patellin-5 OS=Arabidopsis thaliana GN=PATL5 PE=1 SV=2	PATL5	55.337	26.2	59	9	9	134270	135470	115100	108350	127090	101800	104510	88221	119290	182280	169330	180410	117660	105470	77515	137660	128190	119100	203650	162250	207720	37447	40800	0
Capana02g001427	primase homolog protein isoform X3	---	33.834	6.7	9	1	1	0	0	0	0	0	0	0	0	0	0	0	0	0	0	0	0	0	0	0	0	0	0	0	5055.9
Capana02g001438	RL321_ARATH 60S ribosomal protein L32-1 OS=Arabidopsis thaliana GN=RPL32A PE=2 SV=2	RPL32A	15.599	47.4	69	5	2	652750	830510	769370	809370	937340	850530	735130	783560	698530	686430	406540	656290	872340	822030	849050	818980	833760	869640	805370	750660	820310	467250	474240	250880
Capana02g001443	RS4_SOLTU 40S ribosomal protein S4 OS=Solanum tuberosum GN=RPS4 PE=2 SV=1	RPS4	34.985	40.5	48	11	2	1026300	872600	833070	880450	784720	782330	713060	608990	645290	540920	602560	675090	555170	653690	644200	866380	697930	653110	621760	622200	569760	272860	283390	337150
Capana02g001446	protein PLASTID TRANSCRIPTIONALLY ACTIVE 12	---	66.546	15	47	5	5	68878	73908	81779	72808	77641	62558	152340	122280	134340	123320	93194	119430	80376	80220	48265	138980	122180	115870	173370	157580	177100	43175	31444	27138
Capana02g001451	Putative ovule protein	---	17.2	63.8	134	8	8	1353400	1157500	1276900	1099800	1156900	1242100	1268900	1183600	1234000	1663200	1535000	1418200	1192300	1222700	1271700	1052000	1072400	1214700	1062900	1235300	1231800	1703900	1488200	1411700
Capana02g001452	YUGF_BACSU Uncharacterized hydrolase yugF OS=Bacillus subtilis GN=yugF PE=3 SV=1	yugF	46.774	34.1	100	8	8	418120	384210	447910	411960	460290	440890	461980	461610	439860	380830	389360	362950	408970	410420	419740	385300	408280	396350	341460	378270	379790	343390	351680	334820
Capana02g001459	CUL4_ARATH Cullin-4 OS=Arabidopsis thaliana GN=CUL4 PE=1 SV=1	CUL4	98.874	11.3	40	7	3	91214	88467	79993	66377	73073	77353	60366	71056	61163	0	59537	58979	79454	70846	63469	83250	73182	77468	60729	58597	70401	0	0	0
Capana02g001466	KATL2_XENTR Katanin p60 ATPase-containing subunit A-like 2 OS=Xenopus tropicalis GN=katnal2 PE=2 SV=1	katnal2	43.808	7.6	26	2	2	0	0	62856	59597	61843	61349	48457	52818	56235	56444	54793	58620	51185	52003	52861	57366	57832	56986	65861	64478	55152	48388	54103	56911
Capana02g001480	ULP_PROTEASE domain-containing protein	---	14.601	11.5	0	1	1	0	0	0	0	0	0	0	0	0	0	0	0	0	0	0	0	0	0	0	0	0	0	0	0
Capana02g001481	PSA5_SOYBN Proteasome subunit alpha type-5 OS=Glycine max GN=PAE1 PE=2 SV=1	PAE1	25.553	55	225	8	8	2492000	2370200	2314000	2322100	2278700	2201500	2307700	2290300	2312000	3302900	3458500	3482300	2326800	2206900	2191400	2221800	2248100	2229500	2584700	2727200	2575400	3881200	3978000	3953200
Capana02g001484	MNS3_ARATH Mannosyl-oligosaccharide 1,2-alpha-mannosidase MNS3 OS=Arabidopsis thaliana GN=MNS3 PE=2 SV=1	MNS3	66.441	11.4	5	4	4	638570	0	619890	0	0	0	0	0	0	0	0	0	0	0	560140	0	0	0	0	0	0	0	0	0
Capana02g001487	GRS17_ARATH Monothiol glutaredoxin-S17 OS=Arabidopsis thaliana GN=GRXS17 PE=2 SV=1	GRXS17	47.946	43.8	132	13	13	379720	351960	330290	317150	339470	322560	279420	277550	286410	294660	307940	303930	364260	317110	315030	318540	336990	315220	369030	346980	345430	400030	352360	339980
Capana02g001496	RPB2_SOLLC DNA-directed RNA polymerase II subunit RPB2 OS=Solanum lycopersicum GN=RPB2 PE=2 SV=1	RPB2	134.27	5.7	11	5	5	31100	0	23646	28831	18020	21249	52802	54209	47312	26451	22545	22478	21029	0	0	26462	24871	29085	33516	33587	42585	0	0	0
Capana02g001498	GPMB_ECOUT Probable phosphoglycerate mutase gpmB OS=Escherichia coli (strain UTI89 / UPEC) GN=gpmB PE=3 SV=1	gpmB	27.438	63.3	237	11	11	1109900	1090600	1081000	1115400	1153100	1169400	1185900	1141700	1212000	1057300	1015900	1038900	1058700	1038000	1068000	980910	996560	987550	880070	865060	879180	1335700	1355900	1334800
Capana02g001505	Putative ovule protein	---	42.862	7.4	16	2	2	26408	26765	21495	21425	32992	25219	0	0	0	0	9346.7	13862	21080	0	20906	21942	21020	16384	28731	26787	0	14683	15418	0
Capana02g001509	LARP6_HUMAN La-related protein 6 OS=Homo sapiens GN=LARP6 PE=1 SV=1	LARP6	51.511	9.9	35	3	3	51301	50129	49882	46445	42312	42803	35021	47473	46181	37645	0	35298	38552	46609	45788	51533	50370	0	48076	45054	49973	0	26156	24350
Capana02g001512	RS142_ARATH 40S ribosomal protein S14-2 OS=Arabidopsis thaliana GN=RPS14B PE=1 SV=1	RPS14B	16.359	44	27	6	1	0	0	0	0	0	0	0	0	0	0	0	0	0	0	0	0	0	0	0	0	0	0	0	407710
Capana02g001527	RPB7_SOYBN DNA-directed RNA polymerase II subunit RPB7 OS=Glycine max PE=2 SV=1	---	20.286	24.4	34	3	3	322810	225330	199480	201630	230600	233600	68666	145120	134320	155350	73334	206940	146020	124590	120460	252840	0	166700	0	107930	119300	77835	234360	152370
Capana02g001531	NAD(P)-bd_dom domain-containing protein	---	27.176	32.1	36	6	4	28672	63696	41536	71243	76234	70161	73164	64992	73129	55106	57185	49492	60753	59820	65883	62734	74108	62566	46007	43770	46969	59290	82610	93275
Capana02g001554	PO210_HUMAN Nuclear pore membrane glycoprotein 210 OS=Homo sapiens GN=NUP210 PE=1 SV=3	NUP210	213.06	6.2	38	8	8	70004	66662	52841	47098	51423	57098	62201	54524	62234	38756	31073	33946	53164	57750	53623	50266	40247	47488	68202	52940	75092	30699	0	37855
Capana02g001555	Putative ovule protein	---	32.093	57.7	187	13	13	145600	141010	187690	201970	208730	270320	197710	217420	246060	234490	285690	259690	1586300	1617100	1656900	1684500	1783700	1775700	1912800	1830200	1711600	3207300	3189500	3167600
Capana02g001556	KASC1_ARATH 3-oxoacyl-[acyl-carrier-protein] synthase I, chloroplastic OS=Arabidopsis thaliana GN=KAS1 PE=1 SV=2	KAS1	50.081	46.4	408	13	13	2945300	2977200	2852000	3031200	3121800	3029400	2834800	2912500	2916000	2690700	2625100	2613900	2929900	2988800	3059500	3104600	2995300	3057900	2890200	3017600	2910700	2869600	3039600	2960500
Capana02g001557	MCM31_MAIZE DNA replication licensing factor MCM3 homolog 1 OS=Zea mays GN=ROA1 PE=2 SV=2	ROA1	88.021	17.1	66	8	8	104130	92373	77600	107010	81659	76677	40883	34086	0	102600	94826	109840	29621	36856	42014	90070	102740	81280	97837	114910	104550	36914	54307	43720
Capana02g001558	NAD(P)-bd_dom domain-containing protein	---	31.831	47.4	195	10	8	1272700	1253100	1201500	1191600	1229400	1227500	1345300	1314000	1375500	1241300	1248400	1207100	1134600	1127000	1215300	1268800	1194300	1204800	1010200	999600	988330	1640800	1678200	1690900
Capana02g001572	Putative S-adenosyl-L-methionine-dependent methyltransferase-like	---	41.34	22.1	41	5	5	111610	106600	76690	120410	115770	90500	46728	52457	54006	52736	40485	54324	84219	70880	61309	97434	97155	69847	53643	48057	39597	113780	110430	148820
Capana02g001573	COPZ2_ORYSJ Coatomer subunit zeta-2 OS=Oryza sativa subsp. japonica GN=COPZ2 PE=2 SV=1	COPZ2	19.354	20.3	16	3	1	0	0	0	0	0	0	0	0	0	0	0	0	0	0	0	0	0	0	0	0	0	0	0	23290
Capana02g001575	Putative signaling mucin HKR1-like	---	83.781	35.1	194	14	14	801370	746580	753030	672060	634520	603760	433450	446900	471220	703540	737100	722360	608720	621300	612590	630530	613410	601780	624730	616230	599600	650260	635380	674240
Capana02g001576	carboxyl-terminal-processing peptidase 1, chloroplastic	---	16.921	9.2	16	1	1	0	0	0	0	0	0	0	0	0	0	0	0	0	0	0	0	0	0	0	0	0	0	0	14990
Capana02g001577	CTPA_SYNP2 Carboxyl-terminal-processing protease OS=Synechococcus sp. (strain ATCC 27264 / PCC 7002 / PR-6) GN=ctpA PE=3 SV=2	ctpA	52.455	19.2	113	6	6	259740	268470	262050	303320	272440	286880	203490	223630	249290	269250	283860	279770	230050	228150	225680	232060	211600	200190	216600	204160	208760	309900	340830	344450
Capana02g001584	PHYE_IPONI Phytochrome E OS=Ipomoea nil GN=PHYE PE=2 SV=1	PHYE	81.619	6.5	4	3	3	0	0	0	0	0	0	0	0	0	0	0	0	0	0	0	0	42606	0	0	0	0	0	0	0
Capana02g001587	RIMM_ANAVT Probable 16S rRNA-processing protein rimM OS=Anabaena variabilis (strain ATCC 29413 / PCC 7937) GN=rimM PE=3 SV=1	rimM	74.457	11.9	56	6	6	72507	71628	77266	72360	61428	59918	85872	83408	84323	51382	48234	60879	68432	64126	61494	65243	61128	71602	81582	74064	83893	21896	0	38599
Capana02g001588	RL321_ARATH 60S ribosomal protein L32-1 OS=Arabidopsis thaliana GN=RPL32A PE=2 SV=2	RPL32A	15.693	39.1	0	4	1	0	0	0	0	0	0	0	0	0	0	0	0	0	0	0	0	0	0	0	0	0	0	0	0
Capana02g001591	myb-like protein X	---	55.157	40.8	150	13	13	358980	367290	371280	353740	306970	332820	475350	469210	476850	325910	322230	309530	296180	336970	286430	376720	389400	321350	456010	424720	455030	206150	252170	271690
Capana02g001592	NOSTN_HUMAN Nostrin OS=Homo sapiens GN=NOSTRIN PE=1 SV=2	NOSTRIN	39.654	45	146	10	10	356570	347560	355710	351660	314950	339410	330380	343370	353890	371060	369470	354930	327000	313290	320100	339570	346000	312050	336930	354270	333020	311310	314820	332810
Capana02g001610	SUBL_ARATH Subtilisin-like protease OS=Arabidopsis thaliana GN=ARA12 PE=1 SV=1	ARA12	82.902	11.7	17	4	4	42795	31274	35021	39582	31659	38617	34438	35362	0	0	34248	33276	32807	40551	36910	76757	54963	55230	41216	40899	37551	40944	39093	37706
Capana02g001615	SUBL_ARATH Subtilisin-like protease OS=Arabidopsis thaliana GN=ARA12 PE=1 SV=1	ARA12	81.526	9.3	15	3	3	0	10125	0	9787.7	0	0	0	0	0	0	0	0	56061	30614	58400	48430	38247	34207	46961	32849	39803	0	0	0
Capana02g001625	SRG1_ARATH Protein SRG1 OS=Arabidopsis thaliana GN=SRG1 PE=2 SV=1	SRG1	40.765	12.8	23	3	3	32171	29794	35101	36441	0	23531	35220	26830	30896	0	22257	21469	20823	27466	23606	25306	32643	35122	13643	16275	0	13957	19213	19254
Capana02g001643	RAA1C_ARATH Ras-related protein RABA1c OS=Arabidopsis thaliana GN=RABA1C PE=1 SV=1	RABA1C	24.217	48.6	74	9	4	165920	221480	229790	244980	263830	257510	184980	187730	181900	255500	236150	243510	247380	272290	255820	230080	208120	215660	167770	180460	206340	462100	423020	424120
Capana02g001645	CIA30_ARATH Probable complex I intermediate-associated protein 30 OS=Arabidopsis thaliana GN=At1g17350 PE=1 SV=2	At1g17350	66.225	40.7	294	18	18	1371300	1501200	1491200	1441900	1501300	1478900	1869900	1920000	1948300	1750000	1711100	1758200	1624100	1579900	1655800	1662700	1630000	1769200	1815700	1793900	1797000	1719000	1682100	1685200
Capana02g001646	STLP2_ARATH SEC12-like protein 2 OS=Arabidopsis thaliana GN=STL2P PE=1 SV=4	STL2P	41.223	23.4	84	6	2	139100	144450	146880	171870	179590	166970	144920	142060	141760	152340	149960	144630	174430	177850	170270	167080	154350	155420	143240	144400	135060	219580	231550	232700
Capana02g001649	TPS7_ARATH Probable alpha,alpha-trehalose-phosphate synthase [UDP-forming] 7 OS=Arabidopsis thaliana GN=TPS7 PE=1 SV=1	TPS7	96.228	21.9	74	12	8	175520	210400	180570	157840	159000	151880	195590	194920	197230	156620	153430	146000	142820	148760	160060	186200	166600	181520	194840	208180	160440	41225	59481	206660
Capana02g001651	SC61A_DICDI Protein transport protein Sec61 subunit alpha OS=Dictyostelium discoideum GN=sec61a PE=3 SV=1	sec61a	51.832	13.5	85	6	5	212110	273450	297210	292410	315330	354950	215830	209570	224520	219530	178960	201110	343990	330080	299860	220360	228260	234210	195030	194460	206960	639330	600420	598400
Capana02g001653	PYRC_ARATH Dihydroorotase, mitochondrial OS=Arabidopsis thaliana GN=PYR4 PE=2 SV=1	PYR4	30.695	28.5	107	6	6	187070	199430	183440	181540	200010	194030	199730	190370	199170	190640	204670	197150	144570	152650	155050	170830	170850	176350	147010	152560	144150	217350	214280	204210
Capana02g001656	UBTD1_DANRE Ubiquitin domain-containing protein 1 OS=Danio rerio GN=ubtd1 PE=2 SV=1	ubtd1	11.169	13.1	6	1	1	0	0	0	0	0	0	0	0	0	0	0	0	0	0	0	0	0	0	0	0	0	0	0	43767
Capana02g001675	HISX_ARATH Histidinol dehydrogenase, chloroplastic OS=Arabidopsis thaliana GN=HDH PE=2 SV=1	HDH	49.318	38.3	201	10	10	813060	814060	829190	851460	842640	766760	849860	778560	781190	796090	897550	812870	789220	755530	739620	648400	652080	728150	806970	778810	796450	736690	672760	690330
Capana02g001677	RKF1_ARATH Probable LRR receptor-like serine/threonine-protein kinase RFK1 OS=Arabidopsis thaliana GN=RKF1 PE=1 SV=1	RKF1	145.23	3	18	3	3	59556	50171	0	33696	0	44280	35488	53788	0	0	0	0	63303	57184	53227	46326	49490	47653	54735	45991	0	0	0	0
Capana02g001679	Y1765_ARATH Probable LRR receptor-like serine/threonine-protein kinase At1g07650 OS=Arabidopsis thaliana GN=At1g07650 PE=1 SV=1	At1g07650	90.965	1.3	16	1	1	0	0	0	0	0	0	0	0	0	0	0	0	0	0	0	0	0	0	0	0	0	0	0	23874
Capana02g001689	CAD1_ARATH MACPF domain-containing protein CAD1 OS=Arabidopsis thaliana GN=CAD1 PE=2 SV=1	CAD1	62.818	5.3	4	2	2	0	0	0	0	0	0	0	0	0	0	0	0	0	0	0	0	13873	0	0	0	0	0	0	0
Capana02g001694	DRKD_DICDI Probable serine/threonine-protein kinase drkD OS=Dictyostelium discoideum GN=drkD PE=2 SV=1	drkD	52.004	23.7	47	9	9	255210	262490	244130	260340	213220	255190	212130	204480	260660	261720	149540	337290	241170	228710	228580	243950	306800	151830	138790	204600	272140	157620	99848	101230
Capana02g001697	GDL15_ARATH GDSL esterase/lipase At1g29670 OS=Arabidopsis thaliana GN=At1g29670 PE=2 SV=1	At1g29670	36.801	25.2	28	5	5	69206	65658	55086	88812	118180	99196	29023	29040	0	141500	107860	113050	0	0	0	0	0	0	0	22104	0	55082	0	84329
Capana02g001698	VATC_ARATH V-type proton ATPase subunit C OS=Arabidopsis thaliana GN=VHA-C PE=1 SV=1	VHA-C	42.957	49.6	53	13	3	133750	129790	137370	188220	136560	144410	78875	105150	95013	122640	123610	119950	155720	139860	125710	99135	111670	126570	95728	51243	90333	122730	116050	120690
Capana02g001699	GDL15_ARATH GDSL esterase/lipase At1g29670 OS=Arabidopsis thaliana GN=At1g29670 PE=2 SV=1	At1g29670	40.007	31.5	39	7	7	49944	51686	46102	165460	181700	183550	0	0	0	132610	109180	123270	24829	22291	19477	20884	26500	20652	22842	21916	39888	214840	141940	218070
Capana02g001705	CIPKC_ARATH CBL-interacting serine/threonine-protein kinase 12 OS=Arabidopsis thaliana GN=CIPK12 PE=1 SV=1	CIPK12	53.634	10.3	34	4	4	23501	38709	40006	24337	26671	20504	40529	38625	32460	29894	25426	17653	28301	31909	30478	0	32284	30039	51430	37355	40027	0	0	0
Capana02g001712	Y3475_ARATH Probable LRR receptor-like serine/threonine-protein kinase At3g47570 OS=Arabidopsis thaliana GN=At3g47570 PE=1 SV=1	At3g47570	47.536	2.8	18	1	1	0	0	0	0	0	0	0	0	0	0	0	0	0	0	0	0	0	0	0	0	0	0	652940	0
Capana02g001734	rho-N domain-containing protein 1, chloroplastic	---	26.247	18.9	4	2	2	21826	26666	0	24204	0	0	0	0	0	35071	32442	46161	0	0	0	0	0	0	0	0	23758	32303	0	33334
Capana02g001753	PUR4_ARATH Probable phosphoribosylformylglycinamidine synthase, chloroplastic/mitochondrial OS=Arabidopsis thaliana GN=At1g74260 PE=1 SV=2	At1g74260	154.3	30.3	441	29	29	2000400	1837800	1834900	1638900	1631100	1603400	2181500	2169800	2219300	1951600	1911200	1949100	1554300	1610200	1574900	1948200	1933900	1905600	1980600	1988400	1953400	759330	755790	726090
Capana02g001754	XCP2_ARATH Xylem cysteine proteinase 2 OS=Arabidopsis thaliana GN=XCP2 PE=1 SV=2	XCP2	69.954	3.1	14	1	1	0	0	0	0	0	0	0	0	0	0	0	0	0	0	0	0	0	0	0	0	0	0	0	84719
Capana02g001759	TRPF_CHLFF N-(5'-phosphoribosyl)anthranilate isomerase OS=Chlamydophila felis (strain Fe/C-56) GN=trpF PE=3 SV=1	trpF	49.842	10.9	42	3	3	89970	0	85114	81012	83289	81133	85853	84584	94770	86918	91691	93910	121870	0	123200	142900	132840	0	141040	0	153730	147540	137510	146130
Capana02g001765	Putative armadillo repeat-containing kinesin-like protein 2-like	---	13.816	14.5	4	1	1	0	0	0	0	0	0	0	0	0	0	0	0	0	0	0	0	0	0	0	0	0	0	0	15084
Capana02g001796	DSEL_ARATH Phospholipase A1-IIgamma OS=Arabidopsis thaliana GN=DSEL PE=1 SV=1	DSEL	45.09	46.1	141	11	11	312380	331830	316770	306100	323510	304640	132970	132740	127000	229920	253350	216370	230910	259910	246810	179630	199060	179350	121120	108220	119970	298930	304770	308470
Capana02g001798	CYSP_HEMSP Thiol protease SEN102 OS=Hemerocallis sp. GN=SEN102 PE=2 SV=1	SEN102	34.144	4.2	5	1	1	0	0	0	0	0	0	0	0	0	0	0	0	0	0	0	0	0	0	0	0	0	0	0	6214
Capana02g001799	XCP1_ARATH Xylem cysteine proteinase 1 OS=Arabidopsis thaliana GN=XCP1 PE=1 SV=1	XCP1	37.486	32.6	21	5	5	131050	156360	128490	183340	0	176220	0	0	83382	67650	209190	127350	356380	344030	385490	65483	0	166070	190140	0	0	0	257970	61345
Capana02g001802	Protein trichome birefringence-like 40	---	42.203	34.3	126	8	8	259640	262300	263520	294590	285390	270450	289500	276520	257100	196030	182400	172190	324690	320420	335070	340220	352960	370320	254360	271850	260550	353550	298160	352240
Capana02g001804	DSEL_ARATH Phospholipase A1-IIgamma OS=Arabidopsis thaliana GN=DSEL PE=1 SV=1	DSEL	50.203	32.2	128	9	8	297260	278920	289810	285260	292050	294090	348950	309070	329450	352490	331430	339710	355640	374560	356370	355860	367130	341570	369390	389240	389190	425020	471620	441910
Capana02g001805	DSEL_ARATH Phospholipase A1-IIgamma OS=Arabidopsis thaliana GN=DSEL PE=1 SV=1	DSEL	47.364	3.4	6	1	1	0	0	0	0	0	0	0	0	0	0	0	0	0	0	0	0	0	0	0	0	0	0	0	6464.7
Capana02g001806	PLA1_ORYSJ Phospholipase A1-II 1 OS=Oryza sativa subsp. japonica GN=Os01g0651100 PE=2 SV=2	Os01g0651100	45.396	2.7	0	1	1	0	0	0	0	0	0	0	0	0	0	0	0	0	0	0	0	0	0	0	0	0	0	0	0
Capana02g001816	GDL84_ARATH GDSL esterase/lipase At5g45920 OS=Arabidopsis thaliana GN=At5g45920 PE=2 SV=1	At5g45920	26.281	31.1	53	5	5	77442	77031	80676	83827	87823	88417	94497	89068	80813	67380	70577	70564	92689	91325	90060	66649	59759	77675	65921	74703	79562	72862	81843	80675
Capana02g001817	hypothetical protein	---	78.518	4.6	1	2	2	0	0	0	0	0	0	0	0	0	0	0	0	0	0	0	0	0	0	0	0	0	0	0	51362
Capana02g001833	DSEL_ARATH Phospholipase A1-IIgamma OS=Arabidopsis thaliana GN=DSEL PE=1 SV=1	DSEL	38.936	33	19	7	6	0	36697	31838	35457	0	32335	0	0	0	47060	0	0	0	68411	0	0	0	0	0	0	45518	275240	258590	307200
Capana02g001836	ISOA2_ARATH Isoamylase 2, chloroplastic OS=Arabidopsis thaliana GN=ISA2 PE=1 SV=2	ISA2	74.307	8.4	15	3	3	41151	47345	29878	0	37321	25298	26200	31392	39865	0	0	0	0	0	0	29594	20335	22184	0	0	32728	0	0	0
Capana02g001838	GDL85_ARATH GDSL esterase/lipase At5g45950 OS=Arabidopsis thaliana GN=At5g45950 PE=2 SV=1	At5g45950	40.567	15.4	53	4	4	80369	74424	77745	93407	92173	86979	36304	38872	38039	63419	59496	61185	60858	63699	57104	82159	77528	76367	58956	56324	56844	160420	168550	170520
Capana02g001843	ERA_AMOA5 GTPase Era OS=Amoebophilus asiaticus (strain 5a2) GN=era PE=3 SV=1	era	49.44	29.2	117	9	9	276060	257640	267590	249220	292690	257130	250850	240720	262280	260820	254050	243880	231420	240120	232730	248430	263800	243730	272530	257470	253890	166900	185390	209790
Capana02g001858	HAP28_HUMAN 28 kDa heat- and acid-stable phosphoprotein OS=Homo sapiens GN=PDAP1 PE=1 SV=1	PDAP1	22.765	22.4	34	4	4	123760	109000	108340	115940	104850	45818	79056	83897	66202	128620	127190	130000	90619	104410	113780	85792	97295	81227	108660	112870	105290	50128	53476	64695
Capana02g001884	CPSF3_ARATH Cleavage and polyadenylation specificity factor subunit 3-I OS=Arabidopsis thaliana GN=CPSF73-I PE=1 SV=1	CPSF73-I	77.568	29.1	48	11	11	110500	121360	119890	124490	113450	142330	100620	111730	116810	98886	87715	90966	118860	133680	113520	128030	125670	128740	101310	107300	106470	60376	85195	77015
Capana02g001885	Putative OB-fold nucleic acid binding domain containing protein-like	---	17.892	44.2	90	5	5	205400	198880	177600	178970	170140	170470	154560	148650	141080	168010	177080	178250	159100	147860	160940	142960	146190	153430	178630	160140	160560	180400	168390	195070
Capana02g001888	E6_GOSHI Protein E6 OS=Gossypium hirsutum GN=E6 PE=2 SV=1	E6	42.481	8.2	17	2	2	0	0	0	0	0	0	21699	20102	18266	0	0	0	0	0	0	0	0	20399	0	0	0	0	0	0
Capana02g001891	PHS1_DICDI Glycogen phosphorylase 1 OS=Dictyostelium discoideum GN=glpV PE=1 SV=3	glpV	113.55	15.9	80	9	9	228890	199240	196100	153730	144880	131120	322850	322930	311620	174560	162620	148130	146120	135860	141910	253040	246870	253190	274150	251830	319900	0	43170	36069
Capana02g001893	DNJB4_PONAB DnaJ homolog subfamily B member 4 OS=Pongo abelii GN=DNAJB4 PE=2 SV=1	DNAJB4	38.402	17.4	4	3	3	0	0	0	0	0	0	0	0	0	35697	45335	0	0	0	0	0	0	0	0	0	29680	0	0	35121
Capana02g001904	ERF73_ARATH Ethylene-responsive transcription factor ERF073 OS=Arabidopsis thaliana GN=ERF073 PE=2 SV=1	ERF073	40.747	6.4	16	2	2	0	0	0	0	0	0	0	0	0	0	0	0	0	0	0	0	0	0	0	0	0	0	0	315400
Capana02g001912	12KD_FRAAN Auxin-repressed 12.5 kDa protein OS=Fragaria ananassa PE=2 SV=1	---	13.485	51.6	40	3	3	147600	120350	114620	196570	157240	142350	161120	158010	44016	190320	180930	205230	146330	152400	159450	200650	159050	156890	208590	192350	163790	69313	87503	32327
Capana02g001916	NFS1_ARATH Cysteine desulfurase 1, mitochondrial OS=Arabidopsis thaliana GN=NIFS PE=1 SV=1	NIFS	129.74	13.4	59	10	4	146860	142240	126960	146420	133220	133000	134320	140660	134320	123630	119330	115240	126730	120000	123330	147150	127450	124090	130290	134160	145720	140520	139170	153390
Capana02g001917	SBP1_ANTMA Squamosa promoter-binding protein 1 OS=Antirrhinum majus GN=SBP1 PE=2 SV=1	SBP1	15.718	15.4	4	1	1	0	0	0	0	0	0	0	0	0	0	0	0	0	0	0	0	0	0	0	0	0	0	0	14049
Capana02g001928	RR5_SPIOL 30S ribosomal protein S5, chloroplastic OS=Spinacia oleracea GN=rps5 PE=1 SV=1	rps5	22.681	50	144	9	9	1239600	1253100	1246600	1257900	1254300	1257800	1379200	1463600	1376000	1472700	1563600	1573500	1322600	1367800	1383400	1097200	1227000	1207000	1348200	1260900	1339900	1114200	1140200	1120400
Capana02g001935	PEXLP_TOBAC Pistil-specific extensin-like protein OS=Nicotiana tabacum PE=2 SV=1	---	34.855	17.8	58	5	5	684630	796930	750440	743830	819340	882920	525270	483330	514200	922160	945660	891450	620460	642720	652570	646540	646280	655920	561770	582070	566400	962330	1009700	1026100
Capana02g001944	EIF3D_ARATH Eukaryotic translation initiation factor 3 subunit D OS=Arabidopsis thaliana GN=TIF3D1 PE=1 SV=1	TIF3D1	65.452	32.3	251	12	12	1036000	1000200	990660	920270	892860	841720	948070	915890	949190	964750	988950	928710	835480	812880	877030	948330	884750	894230	959070	1027900	1003400	507140	493230	505560
Capana02g001948	HT1_ARATH Serine/threonine-protein kinase HT1 OS=Arabidopsis thaliana GN=HT1 PE=1 SV=1	HT1	57.11	6.3	2	2	2	19808	0	0	0	0	0	0	0	0	0	0	0	0	0	0	0	0	0	0	0	0	0	0	0
Capana02g001953	LRK71_ARATH L-type lectin-domain containing receptor kinase VII.1 OS=Arabidopsis thaliana GN=LECRK71 PE=2 SV=1	LECRK71	78.36	1.6	14	1	1	0	0	0	0	0	0	0	0	0	0	0	0	0	0	0	0	0	0	0	0	0	0	0	104700
[truncated: 4,689 more rows]
