# Supplementary material for: Comprehensive Proteome and Lysine Acetylome Analysis Reveals the Widespread Involvement of Acetylation in Cold Resistance of Pepper (Capsicum annuum L.)
Source: Front Plant Sci. 2021 Aug 27;12:730489. doi: 10.3389/fpls.2021.730489 (PMC8429487; doi:10.3389/fpls.2021.730489)
Supplement: Supplementary Table 2 — Statistics of differentially expressed proteins under cold stress. [file Table_2.XLSX]

## Sheet: Sheet1
Table S2. Statistics of differentially expressed proteins under cold stress.											A188												A122
Protein accession	Protein description	A2/A1 Ratio	Regulated Type	A2/A1 P value	Gene name	Mol. weight [kDa]	Sequence coverage [%]	MS/MS Counts	Peptides	Unique peptides	LFQ intensity T0_1	LFQ intensity T0_2	LFQ intensity T0_3	LFQ intensity T1_1	LFQ intensity T1_2	LFQ intensity T1_3	LFQ intensity T2_1	LFQ intensity T2_2	LFQ intensity T2_3	LFQ intensity R1_1	LFQ intensity R1_2	LFQ intensity R1_3	LFQ intensity T0_1	LFQ intensity T0_2	LFQ intensity T0_3	LFQ intensity T1_1	LFQ intensity T1_2	LFQ intensity T1_3	LFQ intensity T2_1	LFQ intensity T2_2	LFQ intensity T2_3	LFQ intensity R1_1	LFQ intensity R1_2	LFQ intensity R1_3	Subcellular localization	Biological Process	Cellular Component	Molecular Function	KEGG KO No.	KEGG Gene	KEGG pathway	Pfam ID	Domain description
Capana00g003863	"GLUT1_ARATH Glutamate synthase 1 [NADH], chloroplastic OS=Arabidopsis thaliana GN=GLT1 PE=1 SV=2"	0.612	Down	0.0042225	GLT1	237.25	14.1	134	19	19	392420	346780	331780	236780	228030	190180	263640	197190	239470	277870	286080	261440	169850	175500	168140	246820	212650	232250	283370	266860	259920	108420	80562	105520	chloroplast	GO:0006082 organic acid metabolic process; GO:0006520 cellular amino acid metabolic process; GO:0006536 glutamate metabolic process; GO:0006537 glutamate biosynthetic process; GO:0006541 glutamine metabolic process; GO:0006807 nitrogen compound metabolic process; GO:0008152 metabolic process; GO:0008652 cellular amino acid biosynthetic process; GO:0009058 biosynthetic process; GO:0009064 glutamin…	GO:0005622 intracellular; GO:0005623 cell; GO:0005737 cytoplasm; GO:0009507 chloroplast; GO:0009532 plastid stroma; GO:0009536 plastid; GO:0009570 chloroplast stroma; GO:0043226 organelle; GO:0043227 membrane-bounded organelle; GO:0043229 intracellular organelle; GO:0043231 intracellular membrane-bounded organelle; GO:0044422 organelle part; GO:0044424 intracellular part; GO:0044434 chloroplast p…	GO:0003824 catalytic activity; GO:0015930 glutamate synthase activity; GO:0016040 glutamate synthase (NADH) activity; GO:0016491 oxidoreductase activity; GO:0016638 oxidoreductase activity, acting on the CH-NH2 group of donors; GO:0016639 oxidoreductase activity, acting on the CH-NH2 group of donors, NAD or NADP as acceptor; GO:0045181 glutamate synthase activity, NAD(P)H as acceptor;	K00264	GLT1; glutamate synthase (NADPH/NADH) [EC:1.4.1.13 1.4.1.14]	cann00250 Alanine, aspartate and glutamate metabolism; cann00910 Nitrogen metabolism; cann01100 Metabolic pathways; cann01110 Biosynthesis of secondary metabolites; cann01230 Biosynthesis of amino acids	PF00310; PF04898; PF01645; PF07992	Glutamine amidotransferases class-II; Glutamate synthase central domain; Conserved region in glutamate synthase; Pyridine nucleotide-disulphide oxidoreductase
Capana00g005005	HERC1_HUMAN Probable E3 ubiquitin-protein ligase HERC1 OS=Homo sapiens GN=HERC1 PE=1 SV=2	1.761	Up	0.00073747	HERC1	18.154	54.2	41	5	5	0	39493	41880	68326	74507	72177	65889	47679	0	61046	63697	60235	53162	61359	78995	61270	52445	35657	34036	29926	35895	102710	120460	101070	extracellular	GO:0009314 response to radiation; GO:0009411 response to UV; GO:0009416 response to light stimulus; GO:0009605 response to external stimulus; GO:0009628 response to abiotic stimulus; GO:0009649 entrainment of circadian clock; GO:0010224 response to UV-B; GO:0042752 regulation of circadian rhythm; GO:0050789 regulation of biological process; GO:0050896 response to stimulus; GO:0065007 biological r…	GO:0000785 chromatin; GO:0005622 intracellular; GO:0005623 cell; GO:0005634 nucleus; GO:0005694 chromosome; GO:0005737 cytoplasm; GO:0005829 cytosol; GO:0043226 organelle; GO:0043227 membrane-bounded organelle; GO:0043228 non-membrane-bounded organelle; GO:0043229 intracellular organelle; GO:0043231 intracellular membrane-bounded organelle; GO:0043232 intracellular non-membrane-bounded organelle;…	GO:0003682 chromatin binding; GO:0005085 guanyl-nucleotide exchange factor activity; GO:0005488 binding; GO:0005515 protein binding; GO:0019899 enzyme binding; GO:0042802 identical protein binding; GO:0042803 protein homodimerization activity; GO:0046983 protein dimerization activity; GO:0051020 GTPase binding; GO:0098772 molecular function regulator;
Capana00g005089	RH7_SPIOL DEAD-box ATP-dependent RNA helicase 7 OS=Spinacia oleracea GN=RH7 PE=2 SV=1	0.53	Down	0.023861	RH7	74.014	12	12	4	4	81170	61541	88577	38685	42998	0	0	0	0	0	28042	0	0	31185	39913	0	0	0	0	0	27466	0	0	0	nucleus	GO:0006139 nucleobase-containing compound metabolic process; GO:0006725 cellular aromatic compound metabolic process; GO:0006807 nitrogen compound metabolic process; GO:0008152 metabolic process; GO:0009987 cellular process; GO:0010501 RNA secondary structure unwinding; GO:0016070 RNA metabolic process; GO:0034641 cellular nitrogen compound metabolic process; GO:0043170 macromolecule metabolic pr…	GO:0005622 intracellular; GO:0005623 cell; GO:0005634 nucleus; GO:0005730 nucleolus; GO:0005737 cytoplasm; GO:0031974 membrane-enclosed lumen; GO:0031981 nuclear lumen; GO:0043226 organelle; GO:0043227 membrane-bounded organelle; GO:0043228 non-membrane-bounded organelle; GO:0043229 intracellular organelle; GO:0043231 intracellular membrane-bounded organelle; GO:0043232 intracellular non-membrane…	GO:0003724 RNA helicase activity; GO:0003824 catalytic activity; GO:0004004 ATP-dependent RNA helicase activity; GO:0004386 helicase activity; GO:0005488 binding; GO:0005515 protein binding; GO:0008026 ATP-dependent helicase activity; GO:0008186 RNA-dependent ATPase activity; GO:0016462 pyrophosphatase activity; GO:0016787 hydrolase activity; GO:0016817 hydrolase activity, acting on acid anhydrid…	K16911	DDX21; ATP-dependent RNA helicase DDX21 [EC:3.6.4.13]		PF00270; PF08152	DEAD/DEAH box helicase; GUCT (NUC152) domain
Capana01g000948	"CCD4_ARATH Probable carotenoid cleavage dioxygenase 4, chloroplastic OS=Arabidopsis thaliana GN=CCD4 PE=1 SV=1"	0.622	Down	3.5708e-05	CCD4	66.052	23.2	121	10	10	254320	249890	237370	153790	151090	156160	238750	243030	237560	142370	142630	137270	250620	237610	260160	221450	213890	206830	220240	201500	212660	96543	124910	125410	chloroplast				K09840	NCED; 9-cis-epoxycarotenoid dioxygenase [EC:1.13.11.51]	cann00906 Carotenoid biosynthesis; cann01100 Metabolic pathways; cann01110 Biosynthesis of secondary metabolites
Capana01g001179	"PPOF_SOLLC Polyphenol oxidase F, chloroplastic OS=Solanum lycopersicum PE=3 SV=1"	1.818	Up	0.0113802	---	66.077	22.3	68	8	8	262920	213010	223100	417830	431210	421850	87949	81150	57120	225750	277940	284020	128020	123520	126220	89132	92749	101780	110580	119420	116240	216780	234880	215350	chloroplast		GO:0005622 intracellular; GO:0005623 cell; GO:0005737 cytoplasm; GO:0009507 chloroplast; GO:0009534 chloroplast thylakoid; GO:0009536 plastid; GO:0009543 chloroplast thylakoid lumen; GO:0009579 thylakoid; GO:0031976 plastid thylakoid; GO:0031977 thylakoid lumen; GO:0031978 plastid thylakoid lumen; GO:0031984 organelle subcompartment; GO:0043226 organelle; GO:0043227 membrane-bounded organelle; GO…		K00422	E1.10.3.1; polyphenol oxidase [EC:1.10.3.1]	cann00350 Tyrosine metabolism; cann00950 Isoquinoline alkaloid biosynthesis; cann01100 Metabolic pathways; cann01110 Biosynthesis of secondary metabolites	PF00264; PF12142; PF12143	Common central domain of tyrosinase; Polyphenol oxidase middle domain; Protein of unknown function (DUF_B2219)
Capana01g001554	PERX_TOBAC Lignin-forming anionic peroxidase OS=Nicotiana tabacum PE=2 SV=1	0.578	Down	0.008002	---	31.912	27.3	30	4	4	223840	182420	205670	99401	115830	138590	169150	0	33661	195400	112800	222570	25578	26600	30775	0	0	0	0	28871	0	68185	77334	74081	chloroplast				K00430	E1.11.1.7; peroxidase [EC:1.11.1.7]	cann00940 Phenylpropanoid biosynthesis; cann01100 Metabolic pathways; cann01110 Biosynthesis of secondary metabolites	PF00141	Peroxidase
Capana01g002042	PUB4_ARATH U-box domain-containing protein 4 OS=Arabidopsis thaliana GN=PUB4 PE=1 SV=3	0.621	Down	0.020704	PUB4	89.122	10.3	22	5	5	0	33202	43578	23581	23190	24760	27327	15909	0	0	0	18715	16851	16117	26323	21606	0	36201	23669	26522	28718	0	0	0	chloroplast		GO:0005622 intracellular; GO:0005623 cell; GO:0005634 nucleus; GO:0005737 cytoplasm; GO:0043226 organelle; GO:0043227 membrane-bounded organelle; GO:0043229 intracellular organelle; GO:0043231 intracellular membrane-bounded organelle; GO:0044424 intracellular part; GO:0044464 cell part;					PF04564	U-box domain
Capana01g002323	"E132_SOLTU Glucan endo-1,3-beta-glucosidase, basic isoform 2 OS=Solanum tuberosum GN=GLUB2 PE=2 SV=1"	1.834	Up	0.024445	GLUB2	39.57	42	79	10	10	29057	42196	38631	74545	51325	75669	74376	67714	37192	94234	89733	111420	697970	720230	654550	466260	475710	511720	465530	445320	480720	1103800	1051500	1047400	chloroplast	GO:0000272 polysaccharide catabolic process; GO:0002215 defense response to nematode; GO:0002376 immune system process; GO:0005975 carbohydrate metabolic process; GO:0005976 polysaccharide metabolic process; GO:0006073 cellular glucan metabolic process; GO:0006074 (1->3)-beta-D-glucan metabolic process; GO:0006076 (1->3)-beta-D-glucan catabolic process; GO:0006950 response to stress; GO:0006952 d…	GO:0005618 cell wall; GO:0005622 intracellular; GO:0005623 cell; GO:0005737 cytoplasm; GO:0005773 vacuole; GO:0005774 vacuolar membrane; GO:0005886 plasma membrane; GO:0016020 membrane; GO:0030312 external encapsulating structure; GO:0031090 organelle membrane; GO:0031224 intrinsic component of membrane; GO:0031225 anchored component of membrane; GO:0031226 intrinsic component of plasma membrane;…	GO:0001871 pattern binding; GO:0003824 catalytic activity; GO:0004553 hydrolase activity, hydrolyzing O-glycosyl compounds; GO:0005488 binding; GO:0008422 beta-glucosidase activity; GO:0015926 glucosidase activity; GO:0016787 hydrolase activity; GO:0016798 hydrolase activity, acting on glycosyl bonds; GO:0030246 carbohydrate binding; GO:0030247 polysaccharide binding; GO:0042973 glucan endo-1,3-b…				PF00332	Glycosyl hydrolases family 17
Capana01g002431	"AKH_DAUCA Bifunctional aspartokinase/homoserine dehydrogenase, chloroplastic (Fragment) OS=Daucus carota PE=1 SV=1"	0.593	Down	0.0080157	---	52.961	24.8	21	8	4	110560	97885	93896	56049	71429	51942	55554	58651	72654	63436	75337	65492	68032	74707	76247	67885	52126	51810	40689	51133	50798	35169	36589	21365	cytoplasm	GO:0006082 organic acid metabolic process; GO:0006520 cellular amino acid metabolic process; GO:0006793 phosphorus metabolic process; GO:0006796 phosphate-containing compound metabolic process; GO:0006807 nitrogen compound metabolic process; GO:0008152 metabolic process; GO:0008652 cellular amino acid biosynthetic process; GO:0009058 biosynthetic process; GO:0009069 serine family amino acid metab…	GO:0005622 intracellular; GO:0005623 cell; GO:0005737 cytoplasm; GO:0009507 chloroplast; GO:0009532 plastid stroma; GO:0009536 plastid; GO:0009570 chloroplast stroma; GO:0043226 organelle; GO:0043227 membrane-bounded organelle; GO:0043229 intracellular organelle; GO:0043231 intracellular membrane-bounded organelle; GO:0044422 organelle part; GO:0044424 intracellular part; GO:0044434 chloroplast p…	GO:0003824 catalytic activity; GO:0004072 aspartate kinase activity; GO:0004412 homoserine dehydrogenase activity; GO:0016301 kinase activity; GO:0016491 oxidoreductase activity; GO:0016614 oxidoreductase activity, acting on CH-OH group of donors; GO:0016616 oxidoreductase activity, acting on the CH-OH group of donors, NAD or NADP as acceptor; GO:0016740 transferase activity; GO:0016772 transfera…	K12524	thrA; bifunctional aspartokinase / homoserine dehydrogenase 1 [EC:2.7.2.4 1.1.1.3]	cann00260 Glycine, serine and threonine metabolism; cann00261 Monobactam biosynthesis; cann00270 Cysteine and methionine metabolism; cann00300 Lysine biosynthesis; cann01100 Metabolic pathways; cann01110 Biosynthesis of secondary metabolites; cann01230 Biosynthesis of amino acids	PF13840; PF03447; PF00742	Family description; Homoserine dehydrogenase, NAD binding domain; Homoserine dehydrogenase
Capana01g003113	SODC_CAPAN Superoxide dismutase [Cu-Zn] OS=Capsicum annuum GN=SODCC PE=2 SV=1	1.736	Up	0.0085626	SODCC	15.442	38.8	75	3	3	808210	862680	737480	1461200	1592400	1129000	329310	322060	299240	1106300	1412600	1072200	262360	272310	315490	256280	166170	200730	379580	260450	372600	666370	703970	705850	cytoplasm	GO:0000302 response to reactive oxygen species; GO:0000303 response to superoxide; GO:0000305 response to oxygen radical; GO:0001101 response to acid chemical; GO:0006801 superoxide metabolic process; GO:0006950 response to stress; GO:0006952 defense response; GO:0006970 response to osmotic stress; GO:0006979 response to oxidative stress; GO:0008152 metabolic process; GO:0009314 response to radia…	GO:0005576 extracellular region; GO:0005615 extracellular space; GO:0005622 intracellular; GO:0005623 cell; GO:0005634 nucleus; GO:0005737 cytoplasm; GO:0005829 cytosol; GO:0043226 organelle; GO:0043227 membrane-bounded organelle; GO:0043229 intracellular organelle; GO:0043231 intracellular membrane-bounded organelle; GO:0044421 extracellular region part; GO:0044424 intracellular part; GO:0044444…	GO:0003824 catalytic activity; GO:0004784 superoxide dismutase activity; GO:0005488 binding; GO:0005507 copper ion binding; GO:0008270 zinc ion binding; GO:0016209 antioxidant activity; GO:0016491 oxidoreductase activity; GO:0016721 oxidoreductase activity, acting on superoxide radicals as acceptor; GO:0043167 ion binding; GO:0043169 cation binding; GO:0046872 metal ion binding; GO:0046914 transi…	K04565	SOD1; superoxide dismutase, Cu-Zn family [EC:1.15.1.1]	cann04146 Peroxisome	PF00080	Copper/zinc superoxide dismutase (SODC)
Capana01g003908	PATA3_SOLTU Patatin group A-3 OS=Solanum tuberosum PE=2 SV=1	1.953	Up	0.00030341	---	51.013	31.4	112	8	8	156040	151770	181860	317570	314030	324860	99318	81097	80446	434710	405390	468420	384110	366130	370880	187520	183680	213570	417180	428980	453540	404870	389210	380480	cytoplasm
Capana01g004287	RPM1_ARATH Disease resistance protein RPM1 OS=Arabidopsis thaliana GN=RPM1 PE=1 SV=1	0.632	Down	0.037837	RPM1	106.4	4.9	15	3	3	26391	23660	31360	15467	18813	0	0	28452	22307	0	0	0	15551	17977	16713	24905	19455	27115	0	0	20294	0	0	0	chloroplast	GO:0002376 immune system process; GO:0006950 response to stress; GO:0006952 defense response; GO:0006955 immune response; GO:0007154 cell communication; GO:0007165 signal transduction; GO:0008219 cell death; GO:0009626 plant-type hypersensitive response; GO:0009987 cellular process; GO:0012501 programmed cell death; GO:0023052 signaling; GO:0033554 cellular response to stress; GO:0034050 host pro…	GO:0005623 cell; GO:0005886 plasma membrane; GO:0016020 membrane; GO:0019897 extrinsic component of plasma membrane; GO:0019898 extrinsic component of membrane; GO:0044425 membrane part; GO:0044459 plasma membrane part; GO:0044464 cell part; GO:0071944 cell periphery;	GO:0000166 nucleotide binding; GO:0005488 binding; GO:0036094 small molecule binding; GO:0097159 organic cyclic compound binding; GO:1901265 nucleoside phosphate binding; GO:1901363 heterocyclic compound binding;	K13457	RPM1, RPS3; disease resistance protein RPM1	cann04626 Plant-pathogen interaction	PF00931	NB-ARC domain
Capana02g000015	STIP1_BOVIN Stress-induced-phosphoprotein 1 OS=Bos taurus GN=STIP1 PE=2 SV=1	0.588	Down	0.00084261	STIP1	84.869	17.1	32	8	6	86727	94909	78610	52838	49045	51150	86572	71932	74743	53481	45181	46030	49436	43110	34367	77103	59908	54153	101470	74156	77754	0	54085	51639	nucleus		GO:0005622 intracellular; GO:0005623 cell; GO:0005737 cytoplasm; GO:0005829 cytosol; GO:0044424 intracellular part; GO:0044444 cytoplasmic part; GO:0044464 cell part;					PF00564	PB1 domain
Capana02g000272	"APR3_ARATH 5'-adenylylsulfate reductase 3, chloroplastic OS=Arabidopsis thaliana GN=APR3 PE=2 SV=2"	0.619	Down	0.00143728	APR3	51.471	35.3	38	10	7	182320	186270	168750	105280	104280	123080	60983	63206	70197	87987	57270	69322	117140	84392	117110	69779	66171	39267	40138	53880	45253	141190	77159	102290	chloroplast	GO:0000103 sulfate assimilation; GO:0006790 sulfur compound metabolic process; GO:0008152 metabolic process; GO:0009987 cellular process; GO:0019379 sulfate assimilation, phosphoadenylyl sulfate reduction by phosphoadenylyl-sulfate reductase (thioredoxin); GO:0019419 sulfate reduction; GO:0044237 cellular metabolic process; GO:0055114 oxidation-reduction process;	GO:0005622 intracellular; GO:0005623 cell; GO:0005737 cytoplasm; GO:0009507 chloroplast; GO:0009532 plastid stroma; GO:0009536 plastid; GO:0009570 chloroplast stroma; GO:0043226 organelle; GO:0043227 membrane-bounded organelle; GO:0043229 intracellular organelle; GO:0043231 intracellular membrane-bounded organelle; GO:0044422 organelle part; GO:0044424 intracellular part; GO:0044434 chloroplast p…	GO:0003824 catalytic activity; GO:0004604 phosphoadenylyl-sulfate reductase (thioredoxin) activity; GO:0009973 adenylyl-sulfate reductase activity; GO:0016491 oxidoreductase activity; GO:0016667 oxidoreductase activity, acting on a sulfur group of donors; GO:0016671 oxidoreductase activity, acting on a sulfur group of donors, disulfide as acceptor;	K05907	APR; adenylyl-sulfate reductase (glutathione) [EC:1.8.4.9]	cann00920 Sulfur metabolism; cann01100 Metabolic pathways	PF00085	Thioredoxin
Capana02g000894	Y637_PELLD UPF0301 protein Plut_0637 OS=Pelodictyon luteolum (strain DSM 273) GN=Plut_0637 PE=3 SV=1	1.843	Up	0.002103	Plut_0637	33.443	18.6	37	4	1	112440	90270	98380	196370	194430	163980	186450	151680	165540	158770	158500	144030	93859	93646	90171	168170	162020	156950	176940	166730	177200	158360	178900	220920	chloroplast				K07735	algH; putative transcriptional regulator
Capana02g001029	SNF12_ARATH SWI/SNF complex component SNF12 homolog OS=Arabidopsis thaliana GN=At5g14170 PE=1 SV=1	0.636	Down	0.0140584	At5g14170	59.83	14.9	10	5	5	111650	134320	95580	78491	68881	70006	56102	48799	50727	52159	55395	0	77203	76569	77451	59088	74735	70217	0	64760	61232	65266	54099	66972	chloroplast	GO:0006139 nucleobase-containing compound metabolic process; GO:0006259 DNA metabolic process; GO:0006281 DNA repair; GO:0006725 cellular aromatic compound metabolic process; GO:0006807 nitrogen compound metabolic process; GO:0006950 response to stress; GO:0006974 cellular response to DNA damage stimulus; GO:0007275 multicellular organism development; GO:0008152 metabolic process; GO:0009314 resp…	GO:0005622 intracellular; GO:0005623 cell; GO:0005634 nucleus; GO:0043226 organelle; GO:0043227 membrane-bounded organelle; GO:0043229 intracellular organelle; GO:0043231 intracellular membrane-bounded organelle; GO:0044424 intracellular part; GO:0044464 cell part;		K11650	SMARCD; SWI/SNF-related matrix-associated actin-dependent regulator of chromatin subfamily D		PF02201	SWIB/MDM2 domain
Capana02g001162	NCKP1_ARATH Protein NAP1 OS=Arabidopsis thaliana GN=NAP1 PE=1 SV=2	0.65	Down	0.048139	NAP1	124.19	3.8	19	2	2	23222	25987	25212	13327	18904	0	0	0	23088	0	17574	0	0	19090	19884	25889	0	0	27825	26691	23274	0	0	0	cytoplasm	GO:0000902 cell morphogenesis; GO:0000904 cell morphogenesis involved in differentiation; GO:0006355 regulation of transcription, DNA-templated; GO:0006996 organelle organization; GO:0007010 cytoskeleton organization; GO:0007015 actin filament organization; GO:0008064 regulation of actin polymerization or depolymerization; GO:0009653 anatomical structure morphogenesis; GO:0009825 multidimensional…	GO:0005622 intracellular; GO:0005623 cell; GO:0005634 nucleus; GO:0005737 cytoplasm; GO:0005783 endoplasmic reticulum; GO:0005789 endoplasmic reticulum membrane; GO:0012505 endomembrane system; GO:0016020 membrane; GO:0031209 SCAR complex; GO:0031984 organelle subcompartment; GO:0032991 macromolecular complex; GO:0042175 nuclear outer membrane-endoplasmic reticulum membrane network; GO:0043226 or…		K05750	NCKAP1, NAP125; NCK-associated protein 1
Capana02g001697	GDL15_ARATH GDSL esterase/lipase At1g29670 OS=Arabidopsis thaliana GN=At1g29670 PE=2 SV=1	1.612	Up	0.0118382	At1g29670	36.801	25.2	28	5	5	69206	65658	55086	88812	118180	99196	29023	29040	0	141500	107860	113050	0	0	0	0	0	0	0	22104	0	55082	0	84329	cytoplasm
Capana02g001699	GDL15_ARATH GDSL esterase/lipase At1g29670 OS=Arabidopsis thaliana GN=At1g29670 PE=2 SV=1	3.591	Up	1.55961e-05	At1g29670	40.007	31.5	39	7	7	49944	51686	46102	165460	181700	183550	0	0	0	132610	109180	123270	24829	22291	19477	20884	26500	20652	22842	21916	39888	214840	141940	218070	extracellular
Capana02g002159	PME1_FICPW Pectinesterase/pectinesterase inhibitor OS=Ficus pumila var. awkeotsang PE=1 SV=1	0.567	Down	0.0084404	---	52.321	10	46	4	4	22964	22310	0	12184	0	13444	0	0	0	31199	25991	0	127930	115860	101540	115750	143310	138920	90822	91291	87674	171710	171840	164560	cytoplasm	GO:0009605 response to external stimulus; GO:0009607 response to biotic stimulus; GO:0009617 response to bacterium; GO:0043086 negative regulation of catalytic activity; GO:0043207 response to external biotic stimulus; GO:0044092 negative regulation of molecular function; GO:0050790 regulation of catalytic activity; GO:0050896 response to stimulus; GO:0051704 multi-organism process; GO:0051707 re…	GO:0005618 cell wall; GO:0005622 intracellular; GO:0005623 cell; GO:0005737 cytoplasm; GO:0005773 vacuole; GO:0005774 vacuolar membrane; GO:0005829 cytosol; GO:0016020 membrane; GO:0030312 external encapsulating structure; GO:0031090 organelle membrane; GO:0043226 organelle; GO:0043227 membrane-bounded organelle; GO:0043229 intracellular organelle; GO:0043231 intracellular membrane-bounded organe…	GO:0003824 catalytic activity; GO:0004857 enzyme inhibitor activity; GO:0016787 hydrolase activity; GO:0016788 hydrolase activity, acting on ester bonds; GO:0030234 enzyme regulator activity; GO:0030599 pectinesterase activity; GO:0046910 pectinesterase inhibitor activity; GO:0052689 carboxylic ester hydrolase activity; GO:0098772 molecular function regulator;	K01051	E3.1.1.11; pectinesterase [EC:3.1.1.11]	cann00040 Pentose and glucuronate interconversions; cann01100 Metabolic pathways	PF04043	Plant invertase/pectin methylesterase inhibitor
Capana02g002361	Putative RNA ligase/cyclic nucleotide phosphodiesterase family protein-like	1.531	Up	0.0154354	---	20.555	16.9	27	2	2	31647	37020	37792	0	51048	57611	46214	58274	51488	75544	141820	93412	38096	44891	54200	0	0	0	47012	77926	80046	189530	181930	128650	cytoplasm
Capana02g002369	DUF4220 domain-containing protein	0.52	Down	0.028481	---	81.359	9.6	18	4	4	56659	47462	32395	26975	19609	24353	25328	25310	19538	14882	0	0	45216	33609	40543	71500	28242	60702	40400	45762	31545	0	0	0	plasma membrane
Capana02g002477	CHIA_SOLCI Acidic endochitinase pcht28 OS=Solanum chilense PE=2 SV=1	0.535	Down	0.0039447	---	27.647	31.5	36	6	4	49586	42445	49699	24030	0	26516	33714	38552	0	119160	74963	84097	142330	148430	158650	53184	58938	63614	84137	89016	39241	183980	178310	179470	nucleus		GO:0005576 extracellular region; GO:0005615 extracellular space; GO:0044421 extracellular region part;		K20547	CHIB; basic endochitinase B [EC:3.2.1.14]	cann00520 Amino sugar and nucleotide sugar metabolism; cann01100 Metabolic pathways; cann04016 MAPK signaling pathway - plant	PF00182	Chitinase class I
Capana02g002997	Ycf36 family protein	1.546	Up	0.031278	---	34.672	20.7	15	3	3	19098	0	22739	33440	28033	35606	24039	0	20166	16557	0	0	0	0	19651	46776	55477	57975	0	30165	0	0	0	47964	chloroplast	GO:0006950 response to stress; GO:0009605 response to external stimulus; GO:0009991 response to extracellular stimulus; GO:0031667 response to nutrient levels; GO:0042594 response to starvation; GO:0050896 response to stimulus; GO:1990641 response to iron ion starvation;
Capana02g003357	PTBP1_ARATH Polypyrimidine tract-binding protein homolog 1 OS=Arabidopsis thaliana GN=PTB PE=2 SV=1	1.789	Up	0.0115375	PTB	50.883	16.9	22	5	5	71390	49000	61944	93321	119540	113340	31689	43310	0	29599	0	58534	65211	55073	53134	88733	75985	87153	48104	42651	48478	67860	74088	72128	chloroplast	GO:0000381 regulation of alternative mRNA splicing, via spliceosome; GO:0006417 regulation of translation; GO:0007275 multicellular organism development; GO:0009791 post-embryonic development; GO:0009845 seed germination; GO:0009889 regulation of biosynthetic process; GO:0010468 regulation of gene expression; GO:0010556 regulation of macromolecule biosynthetic process; GO:0010608 posttranscriptio…	GO:0000932 P-body; GO:0005622 intracellular; GO:0005623 cell; GO:0005634 nucleus; GO:0005737 cytoplasm; GO:0032991 macromolecular complex; GO:0035770 ribonucleoprotein granule; GO:0036464 cytoplasmic ribonucleoprotein granule; GO:0043226 organelle; GO:0043227 membrane-bounded organelle; GO:0043228 non-membrane-bounded organelle; GO:0043229 intracellular organelle; GO:0043231 intracellular membran…		K14948	PTBP2, NPTB; polypyrimidine tract-binding protein 2		PF00076; PF13893; PF11835	RNA recognition motif. (a.k.a. RRM, RBD, or RNP domain); RNA recognition motif. (a.k.a. RRM, RBD, or RNP domain); Domain of unknown function (DUF3355)
Capana02g003468	PGH2_CHICK Prostaglandin G/H synthase 2 OS=Gallus gallus GN=PTGS2 PE=2 SV=1	0.551	Down	0.00024085	PTGS2	69.188	16.8	36	6	6	90836	83080	80131	49330	46111	44526	87818	84781	81477	59516	53679	60595	64414	50528	63542	46575	40888	47574	40749	40537	0	47524	55187	44325	cytoplasm	GO:0000302 response to reactive oxygen species; GO:0001101 response to acid chemical; GO:0001516 prostaglandin biosynthetic process; GO:0001561 fatty acid alpha-oxidation; GO:0001676 long-chain fatty acid metabolic process; GO:0002376 immune system process; GO:0003008 system process; GO:0003013 circulatory system process; GO:0006082 organic acid metabolic process; GO:0006629 lipid metabolic proce…	GO:0005622 intracellular; GO:0005623 cell; GO:0005737 cytoplasm; GO:0005783 endoplasmic reticulum; GO:0005789 endoplasmic reticulum membrane; GO:0005794 Golgi apparatus; GO:0005811 lipid particle; GO:0012505 endomembrane system; GO:0012511 monolayer-surrounded lipid storage body; GO:0016020 membrane; GO:0031090 organelle membrane; GO:0031984 organelle subcompartment; GO:0042175 nuclear outer memb…	GO:0003824 catalytic activity; GO:0004601 peroxidase activity; GO:0004666 prostaglandin-endoperoxide synthase activity; GO:0016209 antioxidant activity; GO:0016491 oxidoreductase activity; GO:0016684 oxidoreductase activity, acting on peroxide as acceptor; GO:0016701 oxidoreductase activity, acting on single donors with incorporation of molecular oxygen; GO:0016702 oxidoreductase activity, acting…	K10529	DOX1; alpha-dioxygenase [EC:1.-.-.-]	cann00592 alpha-Linolenic acid metabolism	PF03098	Animal haem peroxidase
Capana03g000103	"LOX31_SOLTU Linoleate 13S-lipoxygenase 3-1, chloroplastic OS=Solanum tuberosum GN=LOX3.1 PE=1 SV=1"	0.354	Down	0.0017003	LOX3.1	102.69	14.3	33	8	8	76705	66633	58091	19364	28747	23055	26468	0	28583	67072	76048	57540	33048	33291	34957	25282	27128	18707	15895	0	15904	0	20938	22918	cytoplasm	GO:0000003 reproduction; GO:0000302 response to reactive oxygen species; GO:0001101 response to acid chemical; GO:0003006 developmental process involved in reproduction; GO:0006082 organic acid metabolic process; GO:0006629 lipid metabolic process; GO:0006631 fatty acid metabolic process; GO:0006690 icosanoid metabolic process; GO:0006950 response to stress; GO:0006979 response to oxidative stres…	GO:0005622 intracellular; GO:0005623 cell; GO:0005737 cytoplasm; GO:0009507 chloroplast; GO:0009532 plastid stroma; GO:0009534 chloroplast thylakoid; GO:0009536 plastid; GO:0009570 chloroplast stroma; GO:0009579 thylakoid; GO:0031976 plastid thylakoid; GO:0031984 organelle subcompartment; GO:0043226 organelle; GO:0043227 membrane-bounded organelle; GO:0043229 intracellular organelle; GO:0043231 i…	GO:0003824 catalytic activity; GO:0016165 linoleate 13S-lipoxygenase activity; GO:0016491 oxidoreductase activity; GO:0016701 oxidoreductase activity, acting on single donors with incorporation of molecular oxygen; GO:0016702 oxidoreductase activity, acting on single donors with incorporation of molecular oxygen, incorporation of two atoms of oxygen; GO:0051213 dioxygenase activity;	K00454	LOX2S; lipoxygenase [EC:1.13.11.12]	cann00591 Linoleic acid metabolism; cann00592 alpha-Linolenic acid metabolism; cann01100 Metabolic pathways; cann01110 Biosynthesis of secondary metabolites	PF01477; PF00305	PLAT/LH2 domain; Lipoxygenase
Capana03g000180	BGAL_SOLLC Beta-galactosidase OS=Solanum lycopersicum PE=1 SV=1	1.861	Up	5.9867e-05	---	92.003	55.9	305	25	21	802030	864600	776850	1559300	1482300	1504400	1199100	1321300	1306200	1218400	1225600	1258400	1021600	1024900	999410	938550	945460	952390	821310	836740	792680	1071200	1002500	1076000	chloroplast		GO:0005618 cell wall; GO:0005622 intracellular; GO:0005623 cell; GO:0005737 cytoplasm; GO:0005773 vacuole; GO:0030312 external encapsulating structure; GO:0043226 organelle; GO:0043227 membrane-bounded organelle; GO:0043229 intracellular organelle; GO:0043231 intracellular membrane-bounded organelle; GO:0044424 intracellular part; GO:0044444 cytoplasmic part; GO:0044464 cell part; GO:0071944 cell…	GO:0003824 catalytic activity; GO:0004553 hydrolase activity, hydrolyzing O-glycosyl compounds; GO:0004565 beta-galactosidase activity; GO:0015925 galactosidase activity; GO:0016787 hydrolase activity; GO:0016798 hydrolase activity, acting on glycosyl bonds;				PF01301; PF02140	Glycosyl hydrolases family 35; Galactose binding lectin domain
Capana03g000211	RWDD1_MOUSE RWD domain-containing protein 1 OS=Mus musculus GN=Rwdd1 PE=1 SV=1	0.606	Down	0.036636	Rwdd1	26.899	30.4	41	4	4	37491	34448	26440	0	19704	20066	41867	38810	37643	35480	0	35055	0	23724	13470	45398	39273	0	50850	45708	48565	0	7895.2	16966	nucleus	GO:0002181 cytoplasmic translation; GO:0006355 regulation of transcription, DNA-templated; GO:0006357 regulation of transcription from RNA polymerase II promoter; GO:0006412 translation; GO:0006518 peptide metabolic process; GO:0006807 nitrogen compound metabolic process; GO:0006950 response to stress; GO:0006979 response to oxidative stress; GO:0007154 cell communication; GO:0007165 signal trans…	GO:0005622 intracellular; GO:0005623 cell; GO:0005737 cytoplasm; GO:0005844 polysome; GO:0032991 macromolecular complex; GO:0044424 intracellular part; GO:0044464 cell part; GO:1990904 ribonucleoprotein complex;					PF05773	RWD domain
Capana03g000510	FLOT1_MEDTR Flotillin-like protein 1 OS=Medicago truncatula GN=FLOT1 PE=2 SV=1	0.567	Down	0.0031973	FLOT1	53.736	11.8	28	4	4	49127	57421	45572	30067	30640	25524	41811	44417	44917	0	0	0	70542	60521	59410	49027	45523	59315	61371	55467	55590	63718	60094	57655	cytoplasm				K07192	FLOT; flotillin
Capana03g000613	RUBR1_DESDA Rubredoxin-1 OS=Desulfovibrio desulfuricans (strain ATCC 27774 / DSM 6949) GN=rd1 PE=1 SV=1	1.931	Up	0.04616	rd1	17.362	14.4	54	3	3	206820	293410	344930	544580	537090	549330	531250	485860	535330	399610	394120	384910	440630	460940	449340	496580	503920	533340	428600	433900	421560	589990	573120	553690	chloroplast							PF00301	Rubredoxin
Capana03g001459	RGP3_ARATH UDP-arabinopyranose mutase 3 OS=Arabidopsis thaliana GN=RGP3 PE=1 SV=2	3.976	Up	0.000119868	RGP3	39.91	36.7	40	10	6	70845	73469	94844	324310	304930	321820	0	0	119620	109610	189040	109930	104880	139470	105010	122530	161420	63468	219130	89278	127550	345350	402580	381780	cytoplasm	GO:0006139 nucleobase-containing compound metabolic process; GO:0006725 cellular aromatic compound metabolic process; GO:0006793 phosphorus metabolic process; GO:0006807 nitrogen compound metabolic process; GO:0008152 metabolic process; GO:0009225 nucleotide-sugar metabolic process; GO:0009832 plant-type cell wall biogenesis; GO:0009987 cellular process; GO:0033356 UDP-L-arabinose metabolic proce…	GO:0005622 intracellular; GO:0005623 cell; GO:0005737 cytoplasm; GO:0005794 Golgi apparatus; GO:0005829 cytosol; GO:0012505 endomembrane system; GO:0043226 organelle; GO:0043227 membrane-bounded organelle; GO:0043229 intracellular organelle; GO:0043231 intracellular membrane-bounded organelle; GO:0044424 intracellular part; GO:0044444 cytoplasmic part; GO:0044464 cell part;	GO:0003824 catalytic activity; GO:0016853 isomerase activity; GO:0016866 intramolecular transferase activity; GO:0052691 UDP-arabinopyranose mutase activity;	K13379	RGP, UTM; reversibly glycosylated polypeptide / UDP-arabinopyranose mutase [EC:2.4.1.- 5.4.99.30]	cann00520 Amino sugar and nucleotide sugar metabolism; cann01100 Metabolic pathways
Capana03g001976	ACBP2_ARATH Acyl-CoA-binding domain-containing protein 2 OS=Arabidopsis thaliana GN=ACBP2 PE=1 SV=1	0.628	Down	0.040045	ACBP2	40.471	14.8	17	3	3	24105	31905	20862	14783	14470	19028	0	26907	24927	0	0	0	22634	35792	24994	65657	46814	39976	0	21320	40245	0	0	0	endoplasmic reticulum	GO:0000003 reproduction; GO:0001101 response to acid chemical; GO:0001666 response to hypoxia; GO:0003006 developmental process involved in reproduction; GO:0006629 lipid metabolic process; GO:0006810 transport; GO:0006869 lipid transport; GO:0006950 response to stress; GO:0007275 multicellular organism development; GO:0008152 metabolic process; GO:0009266 response to temperature stimulus; GO:000…	GO:0005618 cell wall; GO:0005622 intracellular; GO:0005623 cell; GO:0005737 cytoplasm; GO:0005777 peroxisome; GO:0005778 peroxisomal membrane; GO:0005783 endoplasmic reticulum; GO:0005789 endoplasmic reticulum membrane; GO:0005886 plasma membrane; GO:0009505 plant-type cell wall; GO:0009514 glyoxysome; GO:0012505 endomembrane system; GO:0016020 membrane; GO:0030312 external encapsulating structur…	GO:0000062 fatty-acyl-CoA binding; GO:0000166 nucleotide binding; GO:0005488 binding; GO:0005543 phospholipid binding; GO:0008289 lipid binding; GO:0017076 purine nucleotide binding; GO:0030554 adenyl nucleotide binding; GO:0032553 ribonucleotide binding; GO:0032555 purine ribonucleotide binding; GO:0032559 adenyl ribonucleotide binding; GO:0032791 lead ion binding; GO:0033218 amide binding; GO:0…				PF00887	Acyl CoA binding protein
Capana03g001994	"SSY1_SOLTU Soluble starch synthase 1, chloroplastic/amyloplastic OS=Solanum tuberosum PE=2 SV=1"	0.63	Down	0.00025892	---	70.796	38.9	147	15	15	357470	348110	319700	219650	218300	208170	312100	341560	334520	203750	186580	210790	372930	361270	357630	369780	343010	341840	355800	354980	338580	145160	151450	165700	chloroplast	GO:0000271 polysaccharide biosynthetic process; GO:0005975 carbohydrate metabolic process; GO:0005976 polysaccharide metabolic process; GO:0005982 starch metabolic process; GO:0006073 cellular glucan metabolic process; GO:0008152 metabolic process; GO:0009058 biosynthetic process; GO:0009059 macromolecule biosynthetic process; GO:0009250 glucan biosynthetic process; GO:0009987 cellular process; G…	GO:0005622 intracellular; GO:0005623 cell; GO:0005737 cytoplasm; GO:0009501 amyloplast; GO:0009507 chloroplast; GO:0009532 plastid stroma; GO:0009536 plastid; GO:0009570 chloroplast stroma; GO:0043226 organelle; GO:0043227 membrane-bounded organelle; GO:0043229 intracellular organelle; GO:0043231 intracellular membrane-bounded organelle; GO:0044422 organelle part; GO:0044424 intracellular part; G…	GO:0003824 catalytic activity; GO:0009011 starch synthase activity; GO:0016740 transferase activity; GO:0016757 transferase activity, transferring glycosyl groups; GO:0016758 transferase activity, transferring hexosyl groups; GO:0046527 glucosyltransferase activity;	K00703	glgA; starch synthase [EC:2.4.1.21]	cann00500 Starch and sucrose metabolism; cann01100 Metabolic pathways; cann01110 Biosynthesis of secondary metabolites	PF08323	Starch synthase catalytic domain
Capana03g004199	CTL1_ARATH Chitinase-like protein 1 OS=Arabidopsis thaliana GN=CTL1 PE=1 SV=1	0.635	Down	0.047404	CTL1	22.974	34.4	31	4	4	114640	95578	89415	76399	67372	46626	36050	34929	61575	52379	54776	0	74023	102080	61834	79521	87806	110540	42475	56192	89969	43380	78801	78559	mitochondria	GO:0000271 polysaccharide biosynthetic process; GO:0001101 response to acid chemical; GO:0005975 carbohydrate metabolic process; GO:0005976 polysaccharide metabolic process; GO:0006073 cellular glucan metabolic process; GO:0006950 response to stress; GO:0006970 response to osmotic stress; GO:0007275 multicellular organism development; GO:0008152 metabolic process; GO:0009058 biosynthetic process;…	GO:0005576 extracellular region; GO:0005622 intracellular; GO:0005623 cell; GO:0005737 cytoplasm; GO:0005794 Golgi apparatus; GO:0012505 endomembrane system; GO:0043226 organelle; GO:0043227 membrane-bounded organelle; GO:0043229 intracellular organelle; GO:0043231 intracellular membrane-bounded organelle; GO:0044424 intracellular part; GO:0044444 cytoplasmic part; GO:0044464 cell part; GO:004804…	GO:0001871 pattern binding; GO:0005488 binding; GO:0030246 carbohydrate binding; GO:0030247 polysaccharide binding;				PF00182	Chitinase class I
Capana04g000086	"GLGB_SOLTU 1,4-alpha-glucan-branching enzyme OS=Solanum tuberosum GN=SBE1 PE=2 SV=2"	0.627	Down	0.0022159	SBE1	93.087	34.6	216	19	19	950330	911570	785500	588560	526020	543570	1008000	1001200	1070800	618240	642510	628970	664890	668080	703360	932390	892750	845630	988670	1050500	987850	151330	208330	197030	nucleus	GO:0005975 carbohydrate metabolic process; GO:0005976 polysaccharide metabolic process; GO:0005982 starch metabolic process; GO:0006073 cellular glucan metabolic process; GO:0008152 metabolic process; GO:0009987 cellular process; GO:0043170 macromolecule metabolic process; GO:0044042 glucan metabolic process; GO:0044237 cellular metabolic process; GO:0044238 primary metabolic process; GO:0044260 …	GO:0005622 intracellular; GO:0005623 cell; GO:0005737 cytoplasm; GO:0009501 amyloplast; GO:0009507 chloroplast; GO:0009536 plastid; GO:0043226 organelle; GO:0043227 membrane-bounded organelle; GO:0043229 intracellular organelle; GO:0043231 intracellular membrane-bounded organelle; GO:0044424 intracellular part; GO:0044444 cytoplasmic part; GO:0044464 cell part;	GO:0003824 catalytic activity; GO:0003844 1,4-alpha-glucan branching enzyme activity; GO:0016740 transferase activity; GO:0016757 transferase activity, transferring glycosyl groups; GO:0016758 transferase activity, transferring hexosyl groups;	K00700	GBE1, glgB; 1,4-alpha-glucan branching enzyme [EC:2.4.1.18]	cann00500 Starch and sucrose metabolism; cann01100 Metabolic pathways; cann01110 Biosynthesis of secondary metabolites	PF02922; PF00128; PF02806	Carbohydrate-binding module 48 (Isoamylase N-terminal domain); Alpha amylase, catalytic domain; Alpha amylase, C-terminal all-beta domain
Capana04g001135	ACINU_MOUSE Apoptotic chromatin condensation inducer in the nucleus OS=Mus musculus GN=Acin1 PE=1 SV=3	0.662	Down	0.0078778	Acin1	92.073	42.8	229	22	21	522200	453040	398260	308060	287490	313080	541540	553500	565650	578470	597230	561250	348120	364080	357830	523240	489060	461400	801600	773500	769370	275700	306810	319630	nucleus				K12875	ACIN1, ACINUS; apoptotic chromatin condensation inducer in the nucleus	cann03013 RNA transport; cann03015 mRNA surveillance pathway; cann03040 Spliceosome
Capana04g001559	Putative JMS09K11.8-like	0.529	Down	0.0149197	---	32.999	26.2	30	5	5	72399	87821	73675	53198	38436	32151	49740	69947	56297	0	23026	36153	74400	55581	35321	0	86542	45674	78899	110530	88344	30597	35124	42448	chloroplast
Capana05g000870	MA656_ARATH 65-kDa microtubule-associated protein 6 OS=Arabidopsis thaliana GN=MAP65-6 PE=1 SV=1	0.659	Down	0.0056407	MAP65-6	68.117	14.8	13	5	5	49378	62477	58253	38867	38094	35112	0	0	36837	0	34831	39504	41415	0	0	0	0	0	0	43710	35439	0	0	0	chloroplast		GO:0005622 intracellular; GO:0005623 cell; GO:0005737 cytoplasm; GO:0005739 mitochondrion; GO:0005856 cytoskeleton; GO:0009524 phragmoplast; GO:0009536 plastid; GO:0009574 preprophase band; GO:0015630 microtubule cytoskeleton; GO:0043226 organelle; GO:0043227 membrane-bounded organelle; GO:0043228 non-membrane-bounded organelle; GO:0043229 intracellular organelle; GO:0043231 intracellular membran…	GO:0005488 binding; GO:0005515 protein binding; GO:0008017 microtubule binding; GO:0008092 cytoskeletal protein binding; GO:0015631 tubulin binding;	K16732	PRC1; protein regulator of cytokinesis 1
Capana06g000711	RS9_RHOPS 30S ribosomal protein S9 OS=Rhodopseudomonas palustris (strain BisB5) GN=rpsI PE=3 SV=1	0.512	Down	0.0129986	rpsI	43.656	11.2	27	3	3	68232	60595	77526	0	31123	39306	66799	72214	46819	60206	63840	63283	48843	45211	54691	38792	37225	48161	59996	37923	58163	49871	34544	33350	chloroplast	GO:0000462 maturation of SSU-rRNA from tricistronic rRNA transcript (SSU-rRNA, 5.8S rRNA, LSU-rRNA); GO:0006139 nucleobase-containing compound metabolic process; GO:0006364 rRNA processing; GO:0006396 RNA processing; GO:0006412 translation; GO:0006518 peptide metabolic process; GO:0006725 cellular aromatic compound metabolic process; GO:0006807 nitrogen compound metabolic process; GO:0007275 mult…	GO:0005622 intracellular; GO:0005623 cell; GO:0005737 cytoplasm; GO:0005739 mitochondrion; GO:0005840 ribosome; GO:0015935 small ribosomal subunit; GO:0032991 macromolecular complex; GO:0043226 organelle; GO:0043227 membrane-bounded organelle; GO:0043228 non-membrane-bounded organelle; GO:0043229 intracellular organelle; GO:0043231 intracellular membrane-bounded organelle; GO:0043232 intracellula…	GO:0003676 nucleic acid binding; GO:0003723 RNA binding; GO:0003735 structural constituent of ribosome; GO:0005198 structural molecule activity; GO:0005488 binding; GO:0097159 organic cyclic compound binding; GO:1901363 heterocyclic compound binding;	K02996	RP-S9, MRPS9, rpsI; small subunit ribosomal protein S9	cann03010 Ribosome
Capana06g001249	PPA1_SOLLC Acid phosphatase 1 OS=Solanum lycopersicum GN=APS1 PE=2 SV=1	1.655	Up	0.0076391	APS1	29.735	39.5	62	8	8	142180	151260	126310	194120	243720	256260	52064	63390	56473	206300	129510	160280	209530	173540	220260	226450	220910	204760	182030	190700	172290	1170300	1105000	1016600	vacuolar membrane	GO:0001101 response to acid chemical; GO:0002213 defense response to insect; GO:0006793 phosphorus metabolic process; GO:0006796 phosphate-containing compound metabolic process; GO:0006950 response to stress; GO:0006952 defense response; GO:0006979 response to oxidative stress; GO:0008152 metabolic process; GO:0009605 response to external stimulus; GO:0009607 response to biotic stimulus; GO:00096…	GO:0005622 intracellular; GO:0005623 cell; GO:0005737 cytoplasm; GO:0005773 vacuole; GO:0005829 cytosol; GO:0005840 ribosome; GO:0022626 cytosolic ribosome; GO:0032991 macromolecular complex; GO:0043226 organelle; GO:0043227 membrane-bounded organelle; GO:0043228 non-membrane-bounded organelle; GO:0043229 intracellular organelle; GO:0043231 intracellular membrane-bounded organelle; GO:0043232 int…	GO:0003824 catalytic activity; GO:0003993 acid phosphatase activity; GO:0005488 binding; GO:0005515 protein binding; GO:0008134 transcription factor binding; GO:0016787 hydrolase activity; GO:0016788 hydrolase activity, acting on ester bonds; GO:0016791 phosphatase activity; GO:0042578 phosphoric ester hydrolase activity;
Capana06g003060	SRSF1_ARATH Pre-mRNA-splicing factor SF2 OS=Arabidopsis thaliana GN=SF2 PE=1 SV=1	1.694	Up	0.0043984	SF2	28.646	27.2	31	5	3	0	62831	66034	100720	107070	119650	112000	134290	56659	79964	151980	158730	51131	60452	58087	68784	81817	36483	85510	77339	85554	144430	196920	186830	cytoplasm		GO:0005622 intracellular; GO:0005623 cell; GO:0005634 nucleus; GO:0005654 nucleoplasm; GO:0016604 nuclear body; GO:0016607 nuclear speck; GO:0031974 membrane-enclosed lumen; GO:0031981 nuclear lumen; GO:0035061 interchromatin granule; GO:0043226 organelle; GO:0043227 membrane-bounded organelle; GO:0043229 intracellular organelle; GO:0043231 intracellular membrane-bounded organelle; GO:0043233 org…	GO:0003676 nucleic acid binding; GO:0003723 RNA binding; GO:0003729 mRNA binding; GO:0005488 binding; GO:0097159 organic cyclic compound binding; GO:1901363 heterocyclic compound binding;	K12890	SFRS1, ASF, SF2; splicing factor, arginine/serine-rich 1	cann03040 Spliceosome	PF00076	RNA recognition motif. (a.k.a. RRM, RBD, or RNP domain)
Capana07g000229	RAE1L_ARATH Rae1-like protein At1g80670 OS=Arabidopsis thaliana GN=At1g80670 PE=2 SV=2	1.502	Up	0.0009952	At1g80670	15.307	66.9	63	6	2	68813	60102	69155	100460	96952	100020	63074	60093	61812	87970	90161	90136	94503	97693	82638	99011	96676	103500	73096	47606	79757	188640	170420	187940	chloroplast	GO:0000972 transcription-dependent tethering of RNA polymerase II gene DNA at nuclear periphery; GO:0006403 RNA localization; GO:0006405 RNA export from nucleus; GO:0006606 protein import into nucleus; GO:0006810 transport; GO:0006886 intracellular protein transport; GO:0006913 nucleocytoplasmic transport; GO:0006996 organelle organization; GO:0008104 protein localization; GO:0009987 cellular pro…	GO:0000151 ubiquitin ligase complex; GO:0005622 intracellular; GO:0005623 cell; GO:0005634 nucleus; GO:0005635 nuclear envelope; GO:0005643 nuclear pore; GO:0005737 cytoplasm; GO:0005829 cytosol; GO:0012505 endomembrane system; GO:0031461 cullin-RING ubiquitin ligase complex; GO:0031967 organelle envelope; GO:0031975 envelope; GO:0032991 macromolecular complex; GO:0043226 organelle; GO:0043227 me…	GO:0003676 nucleic acid binding; GO:0003723 RNA binding; GO:0005488 binding; GO:0005515 protein binding; GO:0032182 ubiquitin-like protein binding; GO:0043130 ubiquitin binding; GO:0097159 organic cyclic compound binding; GO:1901363 heterocyclic compound binding;	K14298	RAE1, GLE2; mRNA export factor	cann03013 RNA transport
Capana07g000545	PRP8_MOUSE Pre-mRNA-processing-splicing factor 8 OS=Mus musculus GN=Prpf8 PE=1 SV=2	0.61	Down	0.0067399	Prpf8	278.45	16.4	144	26	26	332780	281830	262680	189380	155920	189870	468390	454500	501600	199920	186320	217610	121820	158860	134490	362000	364340	369770	527660	564430	557680	16606	0	29678	cytoplasm				K12856	PRPF8, PRP8; pre-mRNA-processing factor 8	cann03040 Spliceosome	PF08082; PF08083; PF10598; PF10597; PF10596; PF12134; PF08084	PRO8NT (NUC069), PrP8 N-terminal domain; PROCN (NUC071) domain; RNA recognition motif of the spliceosomal PrP8; U5-snRNA binding site 2 of PrP8; U6-snRNA interacting domain of PrP8; PRP8 domain IV core; PROCT (NUC072) domain
Capana07g001653	CHIC_SOLLC Basic 30 kDa endochitinase OS=Solanum lycopersicum GN=CHI9 PE=1 SV=1	2.996	Up	0.024937	CHI9	35.494	27.2	42	6	4	14102	18196	0	54346	0	42566	0	0	0	9892.1	34463	16536	183050	197060	140320	181650	143060	147650	71601	63827	111870	234630	346630	363630	extracellular				K20547	CHIB; basic endochitinase B [EC:3.2.1.14]	cann00520 Amino sugar and nucleotide sugar metabolism; cann01100 Metabolic pathways; cann04016 MAPK signaling pathway - plant	PF00187; PF00182	Chitin recognition protein; Chitinase class I
Capana07g002235	AGD5_ARATH Probable ADP-ribosylation factor GTPase-activating protein AGD5 OS=Arabidopsis thaliana GN=AGD5 PE=1 SV=1	0.625	Down	0.0149023	AGD5	48.694	19.2	51	6	6	117120	97595	86398	66687	54060	67501	53409	62650	49093	25750	54262	50404	64024	88043	74353	57231	59939	78536	56224	52725	67761	77934	54597	71641	nucleus	GO:0000003 reproduction; GO:0001558 regulation of cell growth; GO:0003006 developmental process involved in reproduction; GO:0006810 transport; GO:0007275 multicellular organism development; GO:0009791 post-embryonic development; GO:0009838 abscission; GO:0009908 flower development; GO:0009987 cellular process; GO:0010227 floral organ abscission; GO:0016043 cellular component organization; GO:001…	GO:0005622 intracellular; GO:0005623 cell; GO:0005737 cytoplasm; GO:0005768 endosome; GO:0005794 Golgi apparatus; GO:0005802 trans-Golgi network; GO:0005829 cytosol; GO:0012505 endomembrane system; GO:0030135 coated vesicle; GO:0030136 clathrin-coated vesicle; GO:0031410 cytoplasmic vesicle; GO:0031982 vesicle; GO:0031984 organelle subcompartment; GO:0043226 organelle; GO:0043227 membrane-bounded…	GO:0005488 binding; GO:0005515 protein binding; GO:0030276 clathrin binding;	K12486	SMAP; stromal membrane-associated protein	cann04144 Endocytosis	PF01412	Putative GTPase activating protein for Arf
Capana07g002307	"GLGB3_ARATH 1,4-alpha-glucan-branching enzyme 3, chloroplastic/amyloplastic OS=Arabidopsis thaliana GN=SBE3 PE=1 SV=1"	0.664	Down	0.0164232	SBE3	96.828	10.8	24	7	7	56187	53503	67628	44318	39251	34253	74937	44288	77716	69531	0	46232	56601	61155	48203	58941	68793	83550	61228	50617	55314	0	0	0	cytoplasm	GO:0005975 carbohydrate metabolic process; GO:0007275 multicellular organism development; GO:0008152 metabolic process; GO:0009791 post-embryonic development; GO:0032501 multicellular organismal process; GO:0032502 developmental process; GO:0044238 primary metabolic process; GO:0048856 anatomical structure development; GO:0071704 organic substance metabolic process;	GO:0005622 intracellular; GO:0005623 cell; GO:0005737 cytoplasm; GO:0009507 chloroplast; GO:0009536 plastid; GO:0043226 organelle; GO:0043227 membrane-bounded organelle; GO:0043229 intracellular organelle; GO:0043231 intracellular membrane-bounded organelle; GO:0044424 intracellular part; GO:0044444 cytoplasmic part; GO:0044464 cell part;		K00700	GBE1, glgB; 1,4-alpha-glucan branching enzyme [EC:2.4.1.18]	cann00500 Starch and sucrose metabolism; cann01100 Metabolic pathways; cann01110 Biosynthesis of secondary metabolites	PF02922; PF00128; PF02806	Carbohydrate-binding module 48 (Isoamylase N-terminal domain); Alpha amylase, catalytic domain; Alpha amylase, C-terminal all-beta domain
Capana08g001163	DNJC2_RAT DnaJ homolog subfamily C member 2 OS=Rattus norvegicus GN=Dnajc2 PE=2 SV=1	0.623	Down	0.0029604	Dnajc2	74.062	11.5	33	5	5	130510	115730	107530	78236	67021	75213	63209	63273	66010	67652	64548	71354	61770	58287	59017	78163	78112	76894	95451	70968	84417	49695	43518	34271	nucleus	GO:0001558 regulation of cell growth; GO:0006355 regulation of transcription, DNA-templated; GO:0009889 regulation of biosynthetic process; GO:0009891 positive regulation of biosynthetic process; GO:0009893 positive regulation of metabolic process; GO:0010468 regulation of gene expression; GO:0010556 regulation of macromolecule biosynthetic process; GO:0010557 positive regulation of macromolecule…	GO:0005622 intracellular; GO:0005623 cell; GO:0005634 nucleus; GO:0005737 cytoplasm; GO:0005829 cytosol; GO:0043226 organelle; GO:0043227 membrane-bounded organelle; GO:0043229 intracellular organelle; GO:0043231 intracellular membrane-bounded organelle; GO:0044424 intracellular part; GO:0044444 cytoplasmic part; GO:0044464 cell part;	GO:0003682 chromatin binding; GO:0005488 binding; GO:0005515 protein binding; GO:0042393 histone binding; GO:0061649 ubiquitinated histone binding;	K09522	DNAJC2; DnaJ homolog subfamily C member 2		PF00226; PF00249	DnaJ domain; Myb-like DNA-binding domain
Capana08g001861	eIF-5a domain-containing protein	0.597	Down	0.00159632	---	56.212	14.7	63	5	5	208720	209860	227840	115600	143150	127480	171190	162950	151860	156380	174420	125270	136490	129850	155290	140690	150140	185380	177630	147510	205840	100150	144030	111160	chloroplast		GO:0005622 intracellular; GO:0005623 cell; GO:0005737 cytoplasm; GO:0005783 endoplasmic reticulum; GO:0012505 endomembrane system; GO:0043226 organelle; GO:0043227 membrane-bounded organelle; GO:0043229 intracellular organelle; GO:0043231 intracellular membrane-bounded organelle; GO:0044424 intracellular part; GO:0044444 cytoplasmic part; GO:0044464 cell part;	GO:0005488 binding; GO:0005509 calcium ion binding; GO:0043167 ion binding; GO:0043169 cation binding; GO:0046872 metal ion binding;
Capana08g002722	Senescence domain-containing protein	0.638	Down	0.014684	---	48.346	22	51	6	6	86256	79266	62294	46730	52937	45674	53231	30866	44955	108130	116180	114270	59124	57816	60020	54319	54039	60534	49681	46413	45042	49082	69331	57115	cytoplasm				K19366	SPG20; spartin	cann04144 Endocytosis
Capana09g000201	MIOX4_ARATH Inositol oxygenase 4 OS=Arabidopsis thaliana GN=MIOX4 PE=2 SV=1	1.596	Up	0.000117757	MIOX4	37.744	24	15	4	4	30740	30652	31195	46583	51789	49452	27917	0	0	0	0	22149	0	22338	37383	24230	0	0	0	0	28219	0	0	0	cytoskeleton	GO:0008152 metabolic process; GO:0055114 oxidation-reduction process;		GO:0003824 catalytic activity; GO:0016491 oxidoreductase activity; GO:0016701 oxidoreductase activity, acting on single donors with incorporation of molecular oxygen; GO:0050113 inositol oxygenase activity;	K00469	MIOX; inositol oxygenase [EC:1.13.99.1]	cann00053 Ascorbate and aldarate metabolism; cann00562 Inositol phosphate metabolism; cann01100 Metabolic pathways
Capana10g000086	Putative ovule protein	1.827	Up	0.0073439	---	32.696	16.8	35	4	4	71936	83269	97737	178110	149100	135030	124000	161120	165950	171230	170290	103380	230990	191170	140970	269720	207760	175450	157220	165110	147350	210930	190590	258450	mitochondria
Capana10g002301	NANP_RAT N-acylneuraminate-9-phosphatase OS=Rattus norvegicus GN=Nanp PE=1 SV=1	2.045	Up	0.046099	Nanp	32.239	18.5	23	3	3	31594	26512	15015	62264	39359	47973	63568	63624	44669	0	0	0	0	22143	17226	53775	0	46412	67853	44175	63076	0	0	0	chloroplast
Capana11g000044	CDC48_CAPAN Cell division cycle protein 48 homolog OS=Capsicum annuum GN=CAFP PE=2 SV=1	0.619	Down	0.049623	CAFP	89.469	54.7	38	33	4	136250	97924	99244	70123	67693	68433	106000	118880	140670	65213	66342	70960	55246	65189	50252	79828	90431	75334	130800	128110	119800	0	28537	20193	cytoplasm	GO:0009893 positive regulation of metabolic process; GO:0009894 regulation of catabolic process; GO:0009896 positive regulation of catabolic process; GO:0010035 response to inorganic substance; GO:0010038 response to metal ion; GO:0010604 positive regulation of macromolecule metabolic process; GO:0019222 regulation of metabolic process; GO:0042176 regulation of protein catabolic process; GO:00422…	GO:0005622 intracellular; GO:0005623 cell; GO:0005634 nucleus; GO:0005654 nucleoplasm; GO:0005730 nucleolus; GO:0005737 cytoplasm; GO:0005794 Golgi apparatus; GO:0005829 cytosol; GO:0005886 plasma membrane; GO:0012505 endomembrane system; GO:0016020 membrane; GO:0031974 membrane-enclosed lumen; GO:0031981 nuclear lumen; GO:0043226 organelle; GO:0043227 membrane-bounded organelle; GO:0043228 non-m…		K13525	VCP, CDC48; transitional endoplasmic reticulum ATPase	cann04141 Protein processing in endoplasmic reticulum	PF02359; PF02933; PF00004	Cell division protein 48 (CDC48), N-terminal domain; Cell division protein 48 (CDC48), domain 2; ATPase family associated with various cellular activities (AAA)
Capana11g000173	"SODCP_SOLLC Superoxide dismutase [Cu-Zn], chloroplastic OS=Solanum lycopersicum GN=SODCP.2 PE=1 SV=1"	1.707	Up	0.0141212	SODCP.2	24.518	54.5	52	5	5	1020700	726820	673910	1470300	1314200	1347500	248290	389680	293540	304530	828990	637000	186610	150290	52243	190530	120910	108380	214040	139320	146190	319290	344540	337840	chloroplast	GO:0000302 response to reactive oxygen species; GO:0000303 response to superoxide; GO:0000305 response to oxygen radical; GO:0001101 response to acid chemical; GO:0006801 superoxide metabolic process; GO:0006950 response to stress; GO:0006970 response to osmotic stress; GO:0006979 response to oxidative stress; GO:0008152 metabolic process; GO:0009314 response to radiation; GO:0009411 response to …	GO:0005576 extracellular region; GO:0005615 extracellular space; GO:0005622 intracellular; GO:0005623 cell; GO:0005737 cytoplasm; GO:0009507 chloroplast; GO:0009532 plastid stroma; GO:0009536 plastid; GO:0009570 chloroplast stroma; GO:0009579 thylakoid; GO:0043226 organelle; GO:0043227 membrane-bounded organelle; GO:0043229 intracellular organelle; GO:0043231 intracellular membrane-bounded organe…	GO:0003824 catalytic activity; GO:0004784 superoxide dismutase activity; GO:0005488 binding; GO:0005507 copper ion binding; GO:0008270 zinc ion binding; GO:0016209 antioxidant activity; GO:0016491 oxidoreductase activity; GO:0016721 oxidoreductase activity, acting on superoxide radicals as acceptor; GO:0043167 ion binding; GO:0043169 cation binding; GO:0046872 metal ion binding; GO:0046914 transi…	K04565	SOD1; superoxide dismutase, Cu-Zn family [EC:1.15.1.1]	cann04146 Peroxisome	PF00080	Copper/zinc superoxide dismutase (SODC)
Capana11g000281	SC242_CANGA Protein transport protein SEC24-2 OS=Candida glabrata (strain ATCC 2001 / CBS 138 / JCM 3761 / NBRC 0622 / NRRL Y-65) GN=SEC242 PE=3 SV=1	0.661	Down	0.035321	SEC242	77.842	8.8	29	4	4	182020	132710	133910	110440	84551	101720	139060	128260	0	90927	0	69031	101960	107310	98748	103790	100480	77175	125670	119080	114170	41062	0	47738	chloroplast							PF04811; PF04815	Sec23/Sec24 trunk domain; Sec23/Sec24 helical domain
Capana11g000580	EI2BG_DICDI Translation initiation factor eIF-2B subunit gamma OS=Dictyostelium discoideum GN=eif2b3 PE=3 SV=1	0.629	Down	0.025599	eif2b3	44.136	28.2	38	6	6	679510	661400	610320	309840	486640	429540	385330	882900	278550	285030	275670	344140	364960	342840	429920	314700	391750	326760	355570	250190	284710	254840	1502100	174940	chloroplast	GO:0002253 activation of immune response; GO:0002376 immune system process; GO:0002429 immune response-activating cell surface receptor signaling pathway; GO:0002682 regulation of immune system process; GO:0002684 positive regulation of immune system process; GO:0002757 immune response-activating signal transduction; GO:0002764 immune response-regulating signaling pathway; GO:0002768 immune respo…	GO:0005622 intracellular; GO:0005623 cell; GO:0005737 cytoplasm; GO:0005851 eukaryotic translation initiation factor 2B complex; GO:0032991 macromolecular complex; GO:0044424 intracellular part; GO:0044444 cytoplasmic part; GO:0044464 cell part;	GO:0005085 guanyl-nucleotide exchange factor activity; GO:0005488 binding; GO:0005515 protein binding; GO:0019899 enzyme binding; GO:0051020 GTPase binding; GO:0098772 molecular function regulator;	K03241	EIF2B3; translation initiation factor eIF-2B subunit gamma	cann03013 RNA transport
Capana11g000734	UFL1_ARATH E3 UFM1-protein ligase 1 homolog OS=Arabidopsis thaliana GN=At3g46220 PE=2 SV=1	0.585	Down	0.029202	At3g46220	76.759	17.6	52	7	7	126410	118060	97514	84735	64338	51097	113860	102940	103550	104680	70185	94839	96734	72636	78631	108550	88174	106060	146880	82738	155490	64860	86016	44182	cytoplasm				K22755
Capana11g001120	MPD2_SCHPO GYF domain-containing protein mpd2 OS=Schizosaccharomyces pombe (strain 972 / ATCC 24843) GN=mpd2 PE=1 SV=1	0.657	Down	0.0139805	mpd2	162.7	7.1	31	7	6	59816	54376	44167	34776	37196	32100	30919	46952	35658	39125	39835	40614	28478	37519	38281	37518	39188	0	49542	47501	48556	20270	28741	34478	nucleus							PF02213	GYF domain
Capana11g001981	Protein SPIRAL1-like 2	0.428	Down	0.0182204	---	13.073	47.2	32	3	3	69908	44304	53793	25512	22373	0	0	15834	0	40701	57162	29295	0	63362	0	32775	22879	54691	0	20697	16336	0	0	23393	chloroplast	GO:0000226 microtubule cytoskeleton organization; GO:0000902 cell morphogenesis; GO:0006950 response to stress; GO:0006970 response to osmotic stress; GO:0006996 organelle organization; GO:0007010 cytoskeleton organization; GO:0007017 microtubule-based process; GO:0009628 response to abiotic stimulus; GO:0009651 response to salt stress; GO:0009653 anatomical structure morphogenesis; GO:0009826 un…	GO:0005622 intracellular; GO:0005623 cell; GO:0005737 cytoplasm; GO:0005819 spindle; GO:0005856 cytoskeleton; GO:0005874 microtubule; GO:0005876 spindle microtubule; GO:0005881 cytoplasmic microtubule; GO:0005938 cell cortex; GO:0009524 phragmoplast; GO:0009574 preprophase band; GO:0010005 cortical microtubule, transverse to long axis; GO:0015630 microtubule cytoskeleton; GO:0030863 cortical cyto…		K18635	SPR1; protein SPIRAL1 and related proteins
Capana11g002249	GDT15_ARATH GDT1-like protein 5 OS=Arabidopsis thaliana GN=At1g68650 PE=2 SV=1	1.611	Up	0.0046437	At1g68650	18.12	16.3	22	2	2	26651	32197	28147	42275	52208	45666	36158	35205	40392	24512	26356	0	37167	32026	38826	35152	40333	0	41280	59959	0	37096	40377	0	plasma membrane	GO:0009628 response to abiotic stimulus; GO:0050896 response to stimulus; GO:0080167 response to karrikin;			K23541
Capana12g000251	"HIS2_ARATH Histidine biosynthesis bifunctional protein hisIE, chloroplastic OS=Arabidopsis thaliana GN=At1g31860 PE=2 SV=1"	1.611	Up	0.00100476	At1g31860	22.78	20.4	42	4	3	101850	119890	104100	168860	173920	182200	158930	128910	115500	179830	177870	0	57277	52713	49284	115410	100830	118690	68114	100720	79514	50205	61314	53451	chloroplast	GO:0000105 histidine biosynthetic process; GO:0006082 organic acid metabolic process; GO:0006520 cellular amino acid metabolic process; GO:0006547 histidine metabolic process; GO:0006725 cellular aromatic compound metabolic process; GO:0006807 nitrogen compound metabolic process; GO:0008152 metabolic process; GO:0008652 cellular amino acid biosynthetic process; GO:0009058 biosynthetic process; GO…	GO:0005622 intracellular; GO:0005623 cell; GO:0005737 cytoplasm; GO:0009507 chloroplast; GO:0009532 plastid stroma; GO:0009536 plastid; GO:0009570 chloroplast stroma; GO:0043226 organelle; GO:0043227 membrane-bounded organelle; GO:0043229 intracellular organelle; GO:0043231 intracellular membrane-bounded organelle; GO:0044422 organelle part; GO:0044424 intracellular part; GO:0044434 chloroplast p…	GO:0003824 catalytic activity; GO:0004635 phosphoribosyl-AMP cyclohydrolase activity; GO:0004636 phosphoribosyl-ATP diphosphatase activity; GO:0016462 pyrophosphatase activity; GO:0016787 hydrolase activity; GO:0016810 hydrolase activity, acting on carbon-nitrogen (but not peptide) bonds; GO:0016814 hydrolase activity, acting on carbon-nitrogen (but not peptide) bonds, in cyclic amidines; GO:0016…	K11755	hisIE; phosphoribosyl-ATP pyrophosphohydrolase / phosphoribosyl-AMP cyclohydrolase [EC:3.6.1.31 3.5.4.19]	cann00340 Histidine metabolism; cann01100 Metabolic pathways; cann01110 Biosynthesis of secondary metabolites; cann01230 Biosynthesis of amino acids
Capana12g000396	VP202_ARATH Vacuolar protein sorting-associated protein 20 homolog 2 OS=Arabidopsis thaliana GN=VPS20.2 PE=1 SV=1	0.501	Down	0.00064153	VPS20.2	25.34	22.9	37	3	3	64644	71781	68632	37318	35348	30012	84726	102940	85131	100880	92611	112940	60861	0	0	40160	72458	89215	101460	46526	101930	28886	34749	45118	cytoplasm	GO:0006810 transport; GO:0006900 membrane budding; GO:0006996 organelle organization; GO:0007032 endosome organization; GO:0009987 cellular process; GO:0010256 endomembrane system organization; GO:0016043 cellular component organization; GO:0016050 vesicle organization; GO:0016192 vesicle-mediated transport; GO:0051179 localization; GO:0051234 establishment of localization; GO:0061024 membrane or…	GO:0000815 ESCRT III complex; GO:0005622 intracellular; GO:0005623 cell; GO:0005737 cytoplasm; GO:0005768 endosome; GO:0005770 late endosome; GO:0005829 cytosol; GO:0005886 plasma membrane; GO:0010008 endosome membrane; GO:0012505 endomembrane system; GO:0016020 membrane; GO:0031090 organelle membrane; GO:0031410 cytoplasmic vesicle; GO:0031982 vesicle; GO:0032991 macromolecular complex; GO:00364…		K12195	CHMP6, VPS20; charged multivesicular body protein 6	cann04144 Endocytosis
Capana12g001699	CMTA3_ARATH Calmodulin-binding transcription activator 3 OS=Arabidopsis thaliana GN=CMTA3 PE=1 SV=1	0.616	Down	0.0101628	CMTA3	84.492	20.2	49	7	7	79406	62154	65476	36547	44289	46760	49758	62924	61456	47337	30713	39122	42513	43674	44930	77590	69041	67169	84795	75219	78277	0	0	30063	cytoplasm	GO:0006139 nucleobase-containing compound metabolic process; GO:0006351 transcription, DNA-templated; GO:0006355 regulation of transcription, DNA-templated; GO:0006357 regulation of transcription from RNA polymerase II promoter; GO:0006366 transcription from RNA polymerase II promoter; GO:0006725 cellular aromatic compound metabolic process; GO:0006807 nitrogen compound metabolic process; GO:0006…	GO:0005622 intracellular; GO:0005623 cell; GO:0005634 nucleus; GO:0043226 organelle; GO:0043227 membrane-bounded organelle; GO:0043229 intracellular organelle; GO:0043231 intracellular membrane-bounded organelle; GO:0044424 intracellular part; GO:0044464 cell part;	GO:0000981 RNA polymerase II transcription factor activity, sequence-specific DNA binding; GO:0000982 transcription factor activity, RNA polymerase II core promoter proximal region sequence-specific binding; GO:0001077 transcriptional activator activity, RNA polymerase II core promoter proximal region sequence-specific binding; GO:0001228 transcriptional activator activity, RNA polymerase II tran…	K21596	CAMTA; calmodulin-binding transcription activator		PF01833	IPT/TIG domain
Capana12g002264	VPS4_YEAST Vacuolar protein sorting-associated protein 4 OS=Saccharomyces cerevisiae (strain ATCC 204508 / S288c) GN=VPS4 PE=1 SV=1	0.657	Down	0.0186778	VPS4	48.235	27.7	27	8	5	145660	117080	128540	70964	92117	94108	121700	107180	129750	72767	85362	64271	140780	128040	139540	112020	123670	105510	146120	176680	129530	52301	70935	80804	cytoplasm	GO:0000902 cell morphogenesis; GO:0000904 cell morphogenesis involved in differentiation; GO:0006629 lipid metabolic process; GO:0006810 transport; GO:0006900 membrane budding; GO:0006914 autophagy; GO:0006996 organelle organization; GO:0007032 endosome organization; GO:0007033 vacuole organization; GO:0007034 vacuolar transport; GO:0008104 protein localization; GO:0008152 metabolic process; GO:0…	GO:0005622 intracellular; GO:0005623 cell; GO:0005634 nucleus; GO:0005737 cytoplasm; GO:0005768 endosome; GO:0005770 late endosome; GO:0005771 multivesicular body; GO:0005911 cell-cell junction; GO:0009506 plasmodesma; GO:0010008 endosome membrane; GO:0012505 endomembrane system; GO:0016020 membrane; GO:0030054 cell junction; GO:0031090 organelle membrane; GO:0031410 cytoplasmic vesicle; GO:00319…	GO:0000166 nucleotide binding; GO:0003824 catalytic activity; GO:0005488 binding; GO:0005515 protein binding; GO:0005524 ATP binding; GO:0008144 drug binding; GO:0016462 pyrophosphatase activity; GO:0016787 hydrolase activity; GO:0016817 hydrolase activity, acting on acid anhydrides; GO:0016818 hydrolase activity, acting on acid anhydrides, in phosphorus-containing anhydrides; GO:0016887 ATPase a…	K12196	VPS4; vacuolar protein-sorting-associated protein 4	cann04144 Endocytosis	PF04212; PF00004; PF09336	MIT (microtubule interacting and transport) domain; ATPase family associated with various cellular activities (AAA); Vps4 C terminal oligomerisation domain
Capana12g002714	"DXS_ORYSJ Probable 1-deoxy-D-xylulose-5-phosphate synthase, chloroplastic OS=Oryza sativa subsp. japonica GN=CLA1 PE=2 SV=2"	1.554	Up	0.00043735	CLA1	66.765	19.6	54	7	7	49498	55030	53964	80416	86175	79470	11970	0	0	38511	78908	77286	61220	58781	62983	66704	66425	64024	77438	67590	76147	208080	198740	200610	chloroplast				K01662	dxs; 1-deoxy-D-xylulose-5-phosphate synthase [EC:2.2.1.7]	cann00730 Thiamine metabolism; cann00900 Terpenoid backbone biosynthesis; cann01100 Metabolic pathways; cann01110 Biosynthesis of secondary metabolites	PF02779	Transketolase, pyrimidine binding domain
Protein accession	Protein description	A3/A1 Ratio	Regulated Type	A3/A1 P value	Gene name	Mol. weight [kDa]	Sequence coverage [%]	MS/MS Counts	Peptides	Unique peptides	LFQ intensity A1_1	LFQ intensity A1_2	LFQ intensity A1_3	LFQ intensity A2_1	LFQ intensity A2_2	LFQ intensity A2_3	LFQ intensity A3_1	LFQ intensity A3_2	LFQ intensity A3_3	LFQ intensity A4_1	LFQ intensity A4_2	LFQ intensity A4_3	LFQ intensity B1_1	LFQ intensity B1_2	LFQ intensity B1_3	LFQ intensity B2_1	LFQ intensity B2_2	LFQ intensity B2_3	LFQ intensity B3_1	LFQ intensity B3_2	LFQ intensity B3_3	LFQ intensity B4_1	LFQ intensity B4_2	LFQ intensity B4_3	Subcellular localization	Biological Process	Cellular Component	Molecular Function	KEGG KO No.	KEGG Gene	KEGG pathway	Pfam ID	Domain description
Capana00g000465	OLP1_SOLLC Osmotin-like protein OS=Solanum lycopersicum PE=1 SV=1	0.397	Down	0.0044971	---	27.314	33.3	138	8	8	1742700	1478700	1429300	1878000	1942700	1905200	605080	621320	620660	1270000	1255400	1285700	1367600	1343500	1362000	1287400	1231200	1256700	1034100	1003000	1002200	2716400	2790700	3051300	chloroplast							PF00314	Thaumatin family
Capana00g000562	PEAMT_SPIOL Phosphoethanolamine N-methyltransferase OS=Spinacia oleracea GN=PEAMT PE=1 SV=1	0.488	Down	0.0091018	PEAMT	28.769	8.1	35	4	4	92308	62010	77191	69181	68173	67441	40044	42146	30749	50364	57330	0	0	57504	25353	44953	0	0	45742	51918	30874	0	29723	40583	nucleus	GO:0000003 reproduction; GO:0000902 cell morphogenesis; GO:0000904 cell morphogenesis involved in differentiation; GO:0001505 regulation of neurotransmitter levels; GO:0003006 developmental process involved in reproduction; GO:0006576 cellular biogenic amine metabolic process; GO:0006629 lipid metabolic process; GO:0006644 phospholipid metabolic process; GO:0006650 glycerophospholipid metabolic p…	GO:0005622 intracellular; GO:0005623 cell; GO:0005737 cytoplasm; GO:0005829 cytosol; GO:0044424 intracellular part; GO:0044444 cytoplasmic part; GO:0044464 cell part;	GO:0003824 catalytic activity; GO:0008168 methyltransferase activity; GO:0008170 N-methyltransferase activity; GO:0008757 S-adenosylmethionine-dependent methyltransferase activity; GO:0016740 transferase activity; GO:0016741 transferase activity, transferring one-carbon groups; GO:0052667 phosphomethylethanolamine N-methyltransferase activity;	K05929	E2.1.1.103, NMT; phosphoethanolamine N-methyltransferase [EC:2.1.1.103]	cann00564 Glycerophospholipid metabolism	PF13489	Methyltransferase domain
Capana00g000816	AP1M1_HUMAN AP-1 complex subunit mu-1 OS=Homo sapiens GN=AP1M1 PE=1 SV=3	0.635	Down	0.00033784	AP1M1	48.884	25.6	76	8	3	155010	142190	143310	151250	152730	153920	87994	96105	95645	77779	67645	78651	121280	114780	122950	108040	106710	98234	82947	86905	87879	35932	57930	67545	chloroplast				K12393	AP1M; AP-1 complex subunit mu		PF01217	Clathrin adaptor complex small chain
Capana00g000875	"GLGB2_ARATH 1,4-alpha-glucan-branching enzyme 2-2, chloroplastic/amyloplastic OS=Arabidopsis thaliana GN=SBE2.2 PE=1 SV=1"	1.521	Up	3.5861e-05	SBE2.2	88.008	28.7	258	18	18	1333500	1374100	1422600	951510	907930	935760	2095700	2065700	2119300	1306400	1261400	1263700	1007600	969020	1025700	1467300	1563900	1543700	1719600	1778800	1735200	433310	447440	456450	nucleus	GO:0001678 cellular glucose homeostasis; GO:0005975 carbohydrate metabolic process; GO:0005976 polysaccharide metabolic process; GO:0005982 starch metabolic process; GO:0006073 cellular glucan metabolic process; GO:0008152 metabolic process; GO:0009058 biosynthetic process; GO:0009059 macromolecule biosynthetic process; GO:0009314 response to radiation; GO:0009416 response to light stimulus; GO:0…	GO:0005622 intracellular; GO:0005623 cell; GO:0005737 cytoplasm; GO:0009507 chloroplast; GO:0009532 plastid stroma; GO:0009536 plastid; GO:0009570 chloroplast stroma; GO:0043226 organelle; GO:0043227 membrane-bounded organelle; GO:0043229 intracellular organelle; GO:0043231 intracellular membrane-bounded organelle; GO:0044422 organelle part; GO:0044424 intracellular part; GO:0044434 chloroplast p…	GO:0003824 catalytic activity; GO:0003844 1,4-alpha-glucan branching enzyme activity; GO:0016740 transferase activity; GO:0016757 transferase activity, transferring glycosyl groups; GO:0016758 transferase activity, transferring hexosyl groups;	K00700	GBE1, glgB; 1,4-alpha-glucan branching enzyme [EC:2.4.1.18]	cann00500 Starch and sucrose metabolism; cann01100 Metabolic pathways; cann01110 Biosynthesis of secondary metabolites	PF02922; PF00128	Carbohydrate-binding module 48 (Isoamylase N-terminal domain); Alpha amylase, catalytic domain
Capana00g001216	WIT2_ARATH WPP domain-interacting tail-anchored protein 2 OS=Arabidopsis thaliana GN=WIT2 PE=1 SV=1	1.765	Up	0.00075866	WIT2	84.195	29.5	144	17	17	178880	158680	146880	134160	134010	142460	280950	276310	298060	195170	200580	183700	181920	188630	190500	226740	224240	232730	358440	367210	366520	98095	86480	100970	nucleus				K20283	GOLGA4; golgin subfamily A member 4
Capana00g001217	early endosome antigen 1	1.801	Up	0.027259	---	27.858	40.7	33	6	5	94288	108040	82075	119710	100870	80816	184640	202910	124810	135970	129170	58121	107880	133780	101370	114820	153550	117760	207500	238460	197610	51599	52380	76131	nucleus				K20283	GOLGA4; golgin subfamily A member 4
Capana00g001240	COG7_MOUSE Conserved oligomeric Golgi complex subunit 7 OS=Mus musculus GN=Cog7 PE=2 SV=1	0.664	Down	0.0183599	Cog7	92.838	15.2	47	7	7	84146	74695	62244	54804	55544	53094	51511	43443	51910	33685	35170	43023	56205	40241	33703	63897	56567	54757	59261	58736	44532	0	0	21293	cytoplasm				K20294	COG7; conserved oligomeric Golgi complex subunit 7
Capana00g001478	ANM15_ARATH Protein arginine N-methyltransferase 1.5 OS=Arabidopsis thaliana GN=PMRT15 PE=1 SV=2	0.569	Down	0.00196165	PMRT15	73.898	33.3	112	11	11	247540	261390	223690	252920	279560	278880	129120	130790	157210	191040	159310	160490	222540	218110	214940	233360	204370	213080	168000	198300	146040	116050	145710	136500	nucleus	GO:0006325 chromatin organization; GO:0006355 regulation of transcription, DNA-templated; GO:0006464 cellular protein modification process; GO:0006479 protein methylation; GO:0006807 nitrogen compound metabolic process; GO:0006996 organelle organization; GO:0008152 metabolic process; GO:0008213 protein alkylation; GO:0009889 regulation of biosynthetic process; GO:0009909 regulation of flower deve…	GO:0005622 intracellular; GO:0005623 cell; GO:0005634 nucleus; GO:0005737 cytoplasm; GO:0005829 cytosol; GO:0043226 organelle; GO:0043227 membrane-bounded organelle; GO:0043229 intracellular organelle; GO:0043231 intracellular membrane-bounded organelle; GO:0044424 intracellular part; GO:0044444 cytoplasmic part; GO:0044464 cell part;	GO:0003824 catalytic activity; GO:0008168 methyltransferase activity; GO:0008170 N-methyltransferase activity; GO:0008276 protein methyltransferase activity; GO:0008469 histone-arginine N-methyltransferase activity; GO:0008757 S-adenosylmethionine-dependent methyltransferase activity; GO:0016273 arginine N-methyltransferase activity; GO:0016274 protein-arginine N-methyltransferase activity; GO:00…	K02516	PRMT5, HSL7; type II protein arginine methyltransferase [EC:2.1.1.320]	cann03013 RNA transport	PF05185	PRMT5 arginine-N-methyltransferase
Capana00g001759	"RM02_ORYSJ 60S ribosomal protein L2, mitochondrial OS=Oryza sativa subsp. japonica GN=RPL2 PE=2 SV=2"	0.634	Down	0.031816	RPL2	15.395	38.2	14	4	3	20225	23997	15751	16237	15087	18605	11154	13235	13651	0	0	14318	13464	14414	0	16810	14402	0	14481	0	0	0	0	11424	chloroplast	GO:0006412 translation; GO:0006518 peptide metabolic process; GO:0006807 nitrogen compound metabolic process; GO:0008152 metabolic process; GO:0009058 biosynthetic process; GO:0009059 macromolecule biosynthetic process; GO:0009987 cellular process; GO:0010467 gene expression; GO:0019538 protein metabolic process; GO:0032543 mitochondrial translation; GO:0034641 cellular nitrogen compound metaboli…	GO:0000313 organellar ribosome; GO:0000315 organellar large ribosomal subunit; GO:0005622 intracellular; GO:0005623 cell; GO:0005737 cytoplasm; GO:0005739 mitochondrion; GO:0005759 mitochondrial matrix; GO:0005761 mitochondrial ribosome; GO:0005762 mitochondrial large ribosomal subunit; GO:0005840 ribosome; GO:0015934 large ribosomal subunit; GO:0031974 membrane-enclosed lumen; GO:0032991 macromo…	GO:0003676 nucleic acid binding; GO:0003723 RNA binding; GO:0003735 structural constituent of ribosome; GO:0005198 structural molecule activity; GO:0005488 binding; GO:0097159 organic cyclic compound binding; GO:1901363 heterocyclic compound binding;				PF03947	Ribosomal Proteins L2, C-terminal domain
Capana00g001934	RIR1_ARATH Ribonucleoside-diphosphate reductase large subunit OS=Arabidopsis thaliana GN=RNR1 PE=1 SV=1	0.47	Down	0.023957	RNR1	85.738	13.5	31	6	6	77868	77860	76514	70611	68966	74483	39633	28193	41354	55809	47243	44603	28250	34931	28813	43973	49292	39718	42916	45930	42137	0	0	27978	cytoplasm	GO:0006139 nucleobase-containing compound metabolic process; GO:0006259 DNA metabolic process; GO:0006260 DNA replication; GO:0006725 cellular aromatic compound metabolic process; GO:0006753 nucleoside phosphate metabolic process; GO:0006793 phosphorus metabolic process; GO:0006796 phosphate-containing compound metabolic process; GO:0006807 nitrogen compound metabolic process; GO:0008152 metaboli…		GO:0003824 catalytic activity; GO:0004748 ribonucleoside-diphosphate reductase activity, thioredoxin disulfide as acceptor; GO:0016491 oxidoreductase activity; GO:0016725 oxidoreductase activity, acting on CH or CH2 groups; GO:0016728 oxidoreductase activity, acting on CH or CH2 groups, disulfide as acceptor; GO:0061731 ribonucleoside-diphosphate reductase activity;	K10807	RRM1; ribonucleoside-diphosphate reductase subunit M1 [EC:1.17.4.1]	cann00230 Purine metabolism; cann00240 Pyrimidine metabolism; cann00480 Glutathione metabolism; cann01100 Metabolic pathways	PF03477; PF00317	ATP cone domain; Ribonucleotide reductase, all-alpha domain
Capana00g001942	ACCO3_PETHY 1-aminocyclopropane-1-carboxylate oxidase 3 OS=Petunia hybrida GN=ACO3 PE=3 SV=1	0.525	Down	0.00042114	ACO3	36.33	27	20	4	3	16342	14224	16429	0	0	0	7655.6	8319.1	8678.8	0	0	0	53611	54863	61171	52383	25374	26158	36296	22673	34563	0	0	10692	cytoplasm	GO:0000302 response to reactive oxygen species; GO:0001101 response to acid chemical; GO:0006950 response to stress; GO:0006970 response to osmotic stress; GO:0006979 response to oxidative stress; GO:0008152 metabolic process; GO:0009058 biosynthetic process; GO:0009593 detection of chemical stimulus; GO:0009605 response to external stimulus; GO:0009607 response to biotic stimulus; GO:0009620 res…	GO:0005618 cell wall; GO:0005622 intracellular; GO:0005623 cell; GO:0005737 cytoplasm; GO:0005783 endoplasmic reticulum; GO:0005794 Golgi apparatus; GO:0005829 cytosol; GO:0005886 plasma membrane; GO:0005911 cell-cell junction; GO:0009506 plasmodesma; GO:0012505 endomembrane system; GO:0016020 membrane; GO:0030054 cell junction; GO:0030312 external encapsulating structure; GO:0043226 organelle; G…	GO:0003824 catalytic activity; GO:0005488 binding; GO:0005507 copper ion binding; GO:0009815 1-aminocyclopropane-1-carboxylate oxidase activity; GO:0016491 oxidoreductase activity; GO:0016638 oxidoreductase activity, acting on the CH-NH2 group of donors; GO:0016641 oxidoreductase activity, acting on the CH-NH2 group of donors, oxygen as acceptor; GO:0043167 ion binding; GO:0043169 cation binding;…	K05933	E1.14.17.4; aminocyclopropanecarboxylate oxidase [EC:1.14.17.4]	cann00270 Cysteine and methionine metabolism; cann01100 Metabolic pathways; cann01110 Biosynthesis of secondary metabolites	PF03171	2OG-Fe(II) oxygenase superfamily
Capana00g002281	GDL82_ARATH GDSL esterase/lipase At5g45670 OS=Arabidopsis thaliana GN=At5g45670 PE=2 SV=1	0.433	Down	0.0059415	At5g45670	41.212	46.1	60	10	8	288740	195920	226210	239000	233850	240880	82503	119130	105790	222190	181220	216790	160960	131450	163690	82048	165270	118800	131020	126750	124740	309790	350610	385810	extracellular	GO:0002376 immune system process; GO:0006950 response to stress; GO:0006952 defense response; GO:0006955 immune response; GO:0009605 response to external stimulus; GO:0009607 response to biotic stimulus; GO:0009627 systemic acquired resistance; GO:0009814 defense response, incompatible interaction; GO:0043207 response to external biotic stimulus; GO:0045087 innate immune response; GO:0050896 resp…	GO:0005576 extracellular region; GO:0005618 cell wall; GO:0005622 intracellular; GO:0005623 cell; GO:0005634 nucleus; GO:0005737 cytoplasm; GO:0009507 chloroplast; GO:0009534 chloroplast thylakoid; GO:0009536 plastid; GO:0009579 thylakoid; GO:0030312 external encapsulating structure; GO:0031976 plastid thylakoid; GO:0031984 organelle subcompartment; GO:0043226 organelle; GO:0043227 membrane-bound…
Capana00g002379	MBD10_ARATH Methyl-CpG-binding domain-containing protein 10 OS=Arabidopsis thaliana GN=MBD10 PE=1 SV=1	1.534	Up	0.00096206	MBD10	53.159	61.4	270	22	22	547960	564640	497190	420350	377240	357370	775790	829100	863770	966480	969160	922340	548120	505530	524250	902510	834140	745870	1347900	1339500	1336500	457580	447050	423470	nucleus
Capana00g002736	CFI_TOBAC Chalcone--flavonone isomerase OS=Nicotiana tabacum GN=CHI PE=2 SV=1	0.651	Down	3.6184e-05	CHI	31.741	49.8	133	8	8	952970	968010	922730	986170	906620	884690	600840	617910	633590	921510	845050	886320	810520	841040	821470	1072500	1030800	974320	1026500	983950	946710	2049400	2143500	2162700	chloroplast	GO:0008152 metabolic process; GO:0009058 biosynthetic process; GO:0009314 response to radiation; GO:0009411 response to UV; GO:0009416 response to light stimulus; GO:0009628 response to abiotic stimulus; GO:0009719 response to endogenous stimulus; GO:0009725 response to hormone; GO:0009733 response to auxin; GO:0009812 flavonoid metabolic process; GO:0009813 flavonoid biosynthetic process; GO:001…	GO:0000325 plant-type vacuole; GO:0005622 intracellular; GO:0005623 cell; GO:0005634 nucleus; GO:0005737 cytoplasm; GO:0005773 vacuole; GO:0005774 vacuolar membrane; GO:0005783 endoplasmic reticulum; GO:0005789 endoplasmic reticulum membrane; GO:0009705 plant-type vacuole membrane; GO:0012505 endomembrane system; GO:0016020 membrane; GO:0019898 extrinsic component of membrane; GO:0031090 organell…	GO:0003824 catalytic activity; GO:0016853 isomerase activity; GO:0016872 intramolecular lyase activity; GO:0045430 chalcone isomerase activity;	K01859	E5.5.1.6; chalcone isomerase [EC:5.5.1.6]	cann00941 Flavonoid biosynthesis; cann01100 Metabolic pathways; cann01110 Biosynthesis of secondary metabolites	PF02431	Chalcone-flavanone isomerase
Capana00g002792	GLGA_PARUW Glycogen synthase OS=Protochlamydia amoebophila (strain UWE25) GN=glgA PE=3 SV=1	1.646	Up	0.000161386	glgA	114.67	19.6	81	12	12	131780	126050	131890	116570	116470	92656	200560	224240	216630	114230	91149	121840	99372	126720	89287	158580	157190	141430	195900	195340	208520	0	0	63077	chloroplast	GO:0000271 polysaccharide biosynthetic process; GO:0005975 carbohydrate metabolic process; GO:0005976 polysaccharide metabolic process; GO:0005982 starch metabolic process; GO:0006073 cellular glucan metabolic process; GO:0008152 metabolic process; GO:0009058 biosynthetic process; GO:0009059 macromolecule biosynthetic process; GO:0009250 glucan biosynthetic process; GO:0009987 cellular process; G…	GO:0005622 intracellular; GO:0005623 cell; GO:0005737 cytoplasm; GO:0009507 chloroplast; GO:0009536 plastid; GO:0043226 organelle; GO:0043227 membrane-bounded organelle; GO:0043229 intracellular organelle; GO:0043231 intracellular membrane-bounded organelle; GO:0044424 intracellular part; GO:0044444 cytoplasmic part; GO:0044464 cell part;	GO:0003824 catalytic activity; GO:0009011 starch synthase activity; GO:0016740 transferase activity; GO:0016757 transferase activity, transferring glycosyl groups; GO:0016758 transferase activity, transferring hexosyl groups; GO:0046527 glucosyltransferase activity;	K00703	glgA; starch synthase [EC:2.4.1.21]	cann00500 Starch and sucrose metabolism; cann01100 Metabolic pathways; cann01110 Biosynthesis of secondary metabolites	PF08323	Starch synthase catalytic domain
Capana00g003011	"protein CHLORORESPIRATORY REDUCTION 6, chloroplastic"	2.141	Up	0.029318	---	27.811	35.2	42	5	4	31350	23508	50323	38270	49215	67897	86172	62044	76976	105330	93047	94829	64720	82355	81616	42388	66013	58580	78952	83486	96124	180430	143930	176840	chloroplast	GO:0009987 cellular process; GO:0010275 NAD(P)H dehydrogenase complex assembly; GO:0016043 cellular component organization; GO:0022607 cellular component assembly; GO:0034622 cellular macromolecular complex assembly; GO:0043933 macromolecular complex subunit organization; GO:0044085 cellular component biogenesis; GO:0065003 macromolecular complex assembly; GO:0071840 cellular component organizati…	GO:0005622 intracellular; GO:0005623 cell; GO:0005737 cytoplasm; GO:0009507 chloroplast; GO:0009532 plastid stroma; GO:0009534 chloroplast thylakoid; GO:0009535 chloroplast thylakoid membrane; GO:0009536 plastid; GO:0009570 chloroplast stroma; GO:0009579 thylakoid; GO:0016020 membrane; GO:0031976 plastid thylakoid; GO:0031984 organelle subcompartment; GO:0034357 photosynthetic membrane; GO:004265…					PF08847	Domain of unknown function (DUF1817)
Capana00g003381	trichohyalin isoform X1	0.637	Down	0.024515	---	146.42	4.3	35	3	3	36503	31034	33902	38418	31440	27266	21968	25744	16866	32047	30788	33122	0	0	21754	28148	28418	32628	37113	26986	34131	27937	20705	31855	nucleus				K22909
Capana00g003389	UBR7_MOUSE Putative E3 ubiquitin-protein ligase UBR7 OS=Mus musculus GN=Ubr7 PE=2 SV=1	0.412	Down	0.0003363	Ubr7	82.772	19.4	19	4	4	57962	61740	50677	44104	50548	41619	22054	22264	25811	47750	42466	41988	0	24379	18923	36684	42414	28714	41313	37573	0	0	0	0	nucleus				K11979	UBR7; E3 ubiquitin-protein ligase UBR7 [EC:2.3.2.27]
Capana00g003407	PGLR_VITVI Probable polygalacturonase OS=Vitis vinifera GN=GSVIVT00026920001 PE=1 SV=1	0.613	Down	0.00068186	GSVIVT00026920001	48.502	23.9	72	6	6	506070	478840	435460	496680	432120	442960	274710	298450	296530	332950	348910	323460	321100	366380	322600	366340	353100	329020	303790	303440	267750	435530	469490	394500	vacuolar membrane							PF00295	Glycosyl hydrolases family 28
Capana00g003682	TTC1_MOUSE Tetratricopeptide repeat protein 1 OS=Mus musculus GN=Ttc1 PE=2 SV=1	0.638	Down	0.0123951	Ttc1	28.208	29.7	48	5	4	81633	88807	67159	57297	70634	72450	46148	48764	56717	69762	84105	67764	55291	69712	42247	67719	53122	35823	91380	56988	87714	51151	67010	47711	nucleus
Capana00g003764	ANM13_ARATH Probable histone-arginine methyltransferase 1.3 OS=Arabidopsis thaliana GN=PRMT13 PE=2 SV=3	0.5	Down	0.025723	PRMT13	54.105	30.5	50	10	9	206120	168150	128810	212790	142990	144170	110340	71017	70068	100470	98000	88590	159150	198840	162600	159440	163580	119890	95732	78751	136480	250640	281750	272170	endoplasmic reticulum	GO:0000003 reproduction; GO:0003006 developmental process involved in reproduction; GO:0006325 chromatin organization; GO:0006355 regulation of transcription, DNA-templated; GO:0006464 cellular protein modification process; GO:0006479 protein methylation; GO:0006807 nitrogen compound metabolic process; GO:0006950 response to stress; GO:0006970 response to osmotic stress; GO:0006996 organelle orga…	GO:0005622 intracellular; GO:0005623 cell; GO:0005634 nucleus; GO:0005737 cytoplasm; GO:0005829 cytosol; GO:0043226 organelle; GO:0043227 membrane-bounded organelle; GO:0043229 intracellular organelle; GO:0043231 intracellular membrane-bounded organelle; GO:0044424 intracellular part; GO:0044444 cytoplasmic part; GO:0044464 cell part;	GO:0003824 catalytic activity; GO:0005488 binding; GO:0005515 protein binding; GO:0008168 methyltransferase activity; GO:0008170 N-methyltransferase activity; GO:0008276 protein methyltransferase activity; GO:0008469 histone-arginine N-methyltransferase activity; GO:0008757 S-adenosylmethionine-dependent methyltransferase activity; GO:0016273 arginine N-methyltransferase activity; GO:0016274 prot…	K05931	CARM1, PRMT4; type I protein arginine methyltransferase [EC:2.1.1.319]
Capana00g003863	"GLUT1_ARATH Glutamate synthase 1 [NADH], chloroplastic OS=Arabidopsis thaliana GN=GLT1 PE=1 SV=2"	0.654	Down	0.012316	GLT1	237.25	14.1	134	19	19	392420	346780	331780	236780	228030	190180	263640	197190	239470	277870	286080	261440	169850	175500	168140	246820	212650	232250	283370	266860	259920	108420	80562	105520	chloroplast	GO:0006082 organic acid metabolic process; GO:0006520 cellular amino acid metabolic process; GO:0006536 glutamate metabolic process; GO:0006537 glutamate biosynthetic process; GO:0006541 glutamine metabolic process; GO:0006807 nitrogen compound metabolic process; GO:0008152 metabolic process; GO:0008652 cellular amino acid biosynthetic process; GO:0009058 biosynthetic process; GO:0009064 glutamin…	GO:0005622 intracellular; GO:0005623 cell; GO:0005737 cytoplasm; GO:0009507 chloroplast; GO:0009532 plastid stroma; GO:0009536 plastid; GO:0009570 chloroplast stroma; GO:0043226 organelle; GO:0043227 membrane-bounded organelle; GO:0043229 intracellular organelle; GO:0043231 intracellular membrane-bounded organelle; GO:0044422 organelle part; GO:0044424 intracellular part; GO:0044434 chloroplast p…	GO:0003824 catalytic activity; GO:0015930 glutamate synthase activity; GO:0016040 glutamate synthase (NADH) activity; GO:0016491 oxidoreductase activity; GO:0016638 oxidoreductase activity, acting on the CH-NH2 group of donors; GO:0016639 oxidoreductase activity, acting on the CH-NH2 group of donors, NAD or NADP as acceptor; GO:0045181 glutamate synthase activity, NAD(P)H as acceptor;	K00264	GLT1; glutamate synthase (NADPH/NADH) [EC:1.4.1.13 1.4.1.14]	cann00250 Alanine, aspartate and glutamate metabolism; cann00910 Nitrogen metabolism; cann01100 Metabolic pathways; cann01110 Biosynthesis of secondary metabolites; cann01230 Biosynthesis of amino acids	PF00310; PF04898; PF01645; PF07992	Glutamine amidotransferases class-II; Glutamate synthase central domain; Conserved region in glutamate synthase; Pyridine nucleotide-disulphide oxidoreductase
Capana00g004156	PDI54_ORYSJ Protein disulfide isomerase-like 5-4 OS=Oryza sativa subsp. japonica GN=PDIL5-4 PE=2 SV=1	0.641	Down	0.0068812	PDIL5-4	58.312	25.9	52	10	10	189270	153580	201900	177560	217960	199030	121090	111820	116340	126330	140200	111760	131070	172780	157920	130090	102610	111600	92705	94976	95553	196960	189990	161250	chloroplast			GO:0003756 protein disulfide isomerase activity; GO:0003824 catalytic activity; GO:0016853 isomerase activity; GO:0016860 intramolecular oxidoreductase activity; GO:0016864 intramolecular oxidoreductase activity, transposing S-S bonds;				PF13850; PF00085	Endoplasmic Reticulum-Golgi Intermediate Compartment (ERGIC); Thioredoxin
Capana00g004374	ARNA_SERP5 Bifunctional polymyxin resistance protein ArnA OS=Serratia proteamaculans (strain 568) GN=arnA PE=3 SV=1	0.485	Down	1.8713e-06	arnA	43.267	78.6	415	21	14	3643500	3448100	3449800	3750800	3816000	3686400	1721100	1716500	1671500	2502300	2486300	2490700	2928500	2909700	2943400	3552900	3316600	3334400	2779400	2879000	2858800	7137200	7450500	7531500	cytoplasm	GO:0006139 nucleobase-containing compound metabolic process; GO:0006725 cellular aromatic compound metabolic process; GO:0006807 nitrogen compound metabolic process; GO:0008152 metabolic process; GO:0009058 biosynthetic process; GO:0009225 nucleotide-sugar metabolic process; GO:0009226 nucleotide-sugar biosynthetic process; GO:0009987 cellular process; GO:0018130 heterocycle biosynthetic process;…	GO:0005576 extracellular region; GO:0005622 intracellular; GO:0005623 cell; GO:0005737 cytoplasm; GO:0005829 cytosol; GO:0044424 intracellular part; GO:0044444 cytoplasmic part; GO:0044464 cell part; GO:0048046 apoplast;	GO:0000166 nucleotide binding; GO:0003824 catalytic activity; GO:0005488 binding; GO:0016829 lyase activity; GO:0016830 carbon-carbon lyase activity; GO:0016831 carboxy-lyase activity; GO:0036094 small molecule binding; GO:0048037 cofactor binding; GO:0048040 UDP-glucuronate decarboxylase activity; GO:0050662 coenzyme binding; GO:0051287 NAD binding; GO:0097159 organic cyclic compound binding; GO…	K12449	AXS; UDP-apiose/xylose synthase	cann00520 Amino sugar and nucleotide sugar metabolism; cann01100 Metabolic pathways
Capana00g004419	CNOT3_MOUSE CCR4-NOT transcription complex subunit 3 OS=Mus musculus GN=Cnot3 PE=1 SV=1	0.378	Down	0.0069973	Cnot3	58.71	13.1	40	3	3	61780	68249	39766	50718	36645	38805	25139	18887	20222	0	22815	59731	34743	40800	28448	82396	46992	0	54229	0	0	0	36338	55727	nucleus	GO:0000075 cell cycle checkpoint; GO:0000077 DNA damage checkpoint; GO:0000278 mitotic cell cycle; GO:0000288 nuclear-transcribed mRNA catabolic process, deadenylation-dependent decay; GO:0000289 nuclear-transcribed mRNA poly(A) tail shortening; GO:0000956 nuclear-transcribed mRNA catabolic process; GO:0001701 in utero embryonic development; GO:0001824 blastocyst development; GO:0001825 blastocys…	GO:0000932 P-body; GO:0005622 intracellular; GO:0005623 cell; GO:0005737 cytoplasm; GO:0005829 cytosol; GO:0030014 CCR4-NOT complex; GO:0030015 CCR4-NOT core complex; GO:0032991 macromolecular complex; GO:0035770 ribonucleoprotein granule; GO:0036464 cytoplasmic ribonucleoprotein granule; GO:0043226 organelle; GO:0043228 non-membrane-bounded organelle; GO:0043229 intracellular organelle; GO:00432…		K12580	CNOT3, NOT3; CCR4-NOT transcription complex subunit 3	cann03018 RNA degradation
Capana00g004442	"ILVB2_TOBAC Acetolactate synthase 2, chloroplastic OS=Nicotiana tabacum GN=ALS SURB PE=1 SV=1"	0.64	Down	0.0002584	ALS	71.339	36.9	280	14	14	1392300	1271800	1299500	1255800	1249100	1202600	835090	815460	885490	967860	945650	940190	1152000	1132600	1193000	1081600	1070700	1021300	970760	998470	937850	1758500	1779700	1796300	mitochondria	GO:0006082 organic acid metabolic process; GO:0006520 cellular amino acid metabolic process; GO:0006573 valine metabolic process; GO:0006807 nitrogen compound metabolic process; GO:0008152 metabolic process; GO:0008652 cellular amino acid biosynthetic process; GO:0009058 biosynthetic process; GO:0009081 branched-chain amino acid metabolic process; GO:0009082 branched-chain amino acid biosynthetic…	GO:0005622 intracellular; GO:0005623 cell; GO:0005737 cytoplasm; GO:0009507 chloroplast; GO:0009532 plastid stroma; GO:0009536 plastid; GO:0009570 chloroplast stroma; GO:0043226 organelle; GO:0043227 membrane-bounded organelle; GO:0043229 intracellular organelle; GO:0043231 intracellular membrane-bounded organelle; GO:0044422 organelle part; GO:0044424 intracellular part; GO:0044434 chloroplast p…	GO:0003824 catalytic activity; GO:0003984 acetolactate synthase activity; GO:0016740 transferase activity; GO:0016744 transferase activity, transferring aldehyde or ketonic groups;	K01652	E2.2.1.6L, ilvB, ilvG, ilvI; acetolactate synthase I/II/III large subunit [EC:2.2.1.6]	cann00290 Valine, leucine and isoleucine biosynthesis; cann00650 Butanoate metabolism; cann00660 C5-Branched dibasic acid metabolism; cann00770 Pantothenate and CoA biosynthesis; cann01100 Metabolic pathways; cann01110 Biosynthesis of secondary metabolites; cann01210 2-Oxocarboxylic acid metabolism; cann01230 Biosynthesis of amino acids	PF02776; PF00205; PF02775	Thiamine pyrophosphate enzyme, N-terminal TPP binding domain; Thiamine pyrophosphate enzyme, central domain; Thiamine pyrophosphate enzyme, C-terminal TPP binding domain
Capana00g004571	"Y1360_ARATH Thylakoid lumenal protein At1g03610, chloroplastic OS=Arabidopsis thaliana GN=At1g03600 PE=1 SV=1"	1.743	Up	0.0037815	At1g03600	18.958	41.6	98	6	6	454120	510000	542320	502860	620200	587830	1011300	817310	798010	1145700	973990	1182400	987800	915050	976920	597500	700130	829150	1048300	1075400	1241800	2302700	1746600	1592000	chloroplast	GO:0006091 generation of precursor metabolites and energy; GO:0006807 nitrogen compound metabolic process; GO:0008152 metabolic process; GO:0009314 response to radiation; GO:0009416 response to light stimulus; GO:0009628 response to abiotic stimulus; GO:0009642 response to light intensity; GO:0009765 photosynthesis, light harvesting; GO:0009987 cellular process; GO:0010206 photosystem II repair; …	GO:0005622 intracellular; GO:0005623 cell; GO:0005737 cytoplasm; GO:0009507 chloroplast; GO:0009534 chloroplast thylakoid; GO:0009535 chloroplast thylakoid membrane; GO:0009536 plastid; GO:0009543 chloroplast thylakoid lumen; GO:0009579 thylakoid; GO:0016020 membrane; GO:0031976 plastid thylakoid; GO:0031977 thylakoid lumen; GO:0031978 plastid thylakoid lumen; GO:0031984 organelle subcompartment;…		K08902	psb27; photosystem II Psb27 protein	cann00195 Photosynthesis
Capana00g004606	FPA_ARATH Flowering time control protein FPA OS=Arabidopsis thaliana GN=FPA PE=2 SV=2	0.611	Down	0.0098352	FPA	87.832	20.3	48	10	10	176000	178840	199760	153570	159790	157390	127810	119180	91912	199950	131870	154550	139470	144230	150450	153130	110960	139060	158930	148580	163190	172180	196060	197960	nucleus	GO:0000003 reproduction; GO:0000375 RNA splicing, via transesterification reactions; GO:0000377 RNA splicing, via transesterification reactions with bulged adenosine as nucleophile; GO:0000398 mRNA splicing, via spliceosome; GO:0003006 developmental process involved in reproduction; GO:0006139 nucleobase-containing compound metabolic process; GO:0006325 chromatin organization; GO:0006342 chromati…	GO:0000785 chromatin; GO:0005622 intracellular; GO:0005623 cell; GO:0005634 nucleus; GO:0005694 chromosome; GO:0043226 organelle; GO:0043227 membrane-bounded organelle; GO:0043228 non-membrane-bounded organelle; GO:0043229 intracellular organelle; GO:0043231 intracellular membrane-bounded organelle; GO:0043232 intracellular non-membrane-bounded organelle; GO:0044422 organelle part; GO:0044424 int…	GO:0003676 nucleic acid binding; GO:0003723 RNA binding; GO:0005488 binding; GO:0097159 organic cyclic compound binding; GO:1901363 heterocyclic compound binding;				PF00076; PF07744	RNA recognition motif. (a.k.a. RRM, RBD, or RNP domain); SPOC domain
Capana00g004800	CDPK3_ARATH Calcium-dependent protein kinase 3 OS=Arabidopsis thaliana GN=CPK3 PE=1 SV=1	0.571	Down	0.033856	CPK3	26.202	29.4	42	5	5	202020	123770	122840	107880	114690	109850	91385	82428	82357	104670	86038	85865	67105	96510	97354	75096	70567	71777	89127	84472	78866	88833	83058	61833	chloroplast	GO:0001101 response to acid chemical; GO:0006464 cellular protein modification process; GO:0006468 protein phosphorylation; GO:0006793 phosphorus metabolic process; GO:0006796 phosphate-containing compound metabolic process; GO:0006807 nitrogen compound metabolic process; GO:0007154 cell communication; GO:0007165 signal transduction; GO:0008152 metabolic process; GO:0009719 response to endogenous…	GO:0005622 intracellular; GO:0005623 cell; GO:0005634 nucleus; GO:0005737 cytoplasm; GO:0043226 organelle; GO:0043227 membrane-bounded organelle; GO:0043229 intracellular organelle; GO:0043231 intracellular membrane-bounded organelle; GO:0044424 intracellular part; GO:0044464 cell part;	GO:0003824 catalytic activity; GO:0004672 protein kinase activity; GO:0004674 protein serine/threonine kinase activity; GO:0004683 calmodulin-dependent protein kinase activity; GO:0005488 binding; GO:0005515 protein binding; GO:0005516 calmodulin binding; GO:0009931 calcium-dependent protein serine/threonine kinase activity; GO:0010857 calcium-dependent protein kinase activity; GO:0016301 kinase …	K13412	CPK; calcium-dependent protein kinase [EC:2.7.11.1]	cann04626 Plant-pathogen interaction	PF00069	Protein kinase domain
Capana00g004847	RAA2A_ARATH Ras-related protein RABA2a OS=Arabidopsis thaliana GN=RABA2A PE=2 SV=1	0.54	Down	0.0048807	RABA2A	24.155	36.7	40	5	4	71223	73097	0	68757	64243	68164	35964	36887	44017	0	38691	48413	72924	63846	60836	52983	71310	61668	0	0	32379	84180	82397	77670	chloroplast				K07904	RAB11A; Ras-related protein Rab-11A	cann04144 Endocytosis	PF00071	Ras family
Capana00g004915	Y1491_ARATH DUF246 domain-containing protein At1g04910 OS=Arabidopsis thaliana GN=At1g04910 PE=1 SV=1	0.369	Down	0.0145374	At1g04910	45.392	20.3	28	4	3	158960	155140	109930	172240	162030	150030	43849	0	60472	58908	45230	0	40780	63922	60429	80892	115180	67819	47877	47243	0	52643	69815	66967	vacuolar membrane	GO:0000271 polysaccharide biosynthetic process; GO:0005975 carbohydrate metabolic process; GO:0005976 polysaccharide metabolic process; GO:0008152 metabolic process; GO:0009058 biosynthetic process; GO:0009059 macromolecule biosynthetic process; GO:0009664 plant-type cell wall organization; GO:0009832 plant-type cell wall biogenesis; GO:0009987 cellular process; GO:0010383 cell wall polysaccharid…	GO:0005618 cell wall; GO:0005622 intracellular; GO:0005623 cell; GO:0005737 cytoplasm; GO:0005768 endosome; GO:0005794 Golgi apparatus; GO:0005802 trans-Golgi network; GO:0009505 plant-type cell wall; GO:0012505 endomembrane system; GO:0030312 external encapsulating structure; GO:0031410 cytoplasmic vesicle; GO:0031982 vesicle; GO:0031984 organelle subcompartment; GO:0043226 organelle; GO:0043227…	GO:0000030 mannosyltransferase activity; GO:0003824 catalytic activity; GO:0016740 transferase activity; GO:0016757 transferase activity, transferring glycosyl groups; GO:0016758 transferase activity, transferring hexosyl groups; GO:0019187 beta-1,4-mannosyltransferase activity; GO:0051753 mannan synthase activity;
Capana00g005031	arginine/serine-rich coiled-coil protein 2 isoform X2	0.551	Down	0.027496	---	55.982	7	21	2	2	42329	47925	0	43265	0	52285	0	22905	26868	0	38566	38199	28805	24079	0	0	22747	0	0	32576	0	0	35450	0	nucleus
Capana00g005043	RPOA_SOLTU DNA-directed RNA polymerase subunit alpha OS=Solanum tuberosum GN=rpoA PE=3 SV=1	0.657	Down	0.00074306	rpoA	38.636	24.9	76	5	5	319520	312430	283560	333870	319660	298200	209040	190810	202020	209190	177670	140570	292000	279740	294240	285010	260960	273170	186700	196050	184200	292200	260630	255910	nucleus	GO:0006139 nucleobase-containing compound metabolic process; GO:0006351 transcription, DNA-templated; GO:0006354 DNA-templated transcription, elongation; GO:0006725 cellular aromatic compound metabolic process; GO:0006807 nitrogen compound metabolic process; GO:0008152 metabolic process; GO:0009058 biosynthetic process; GO:0009059 macromolecule biosynthetic process; GO:0009987 cellular process; G…	GO:0005622 intracellular; GO:0005623 cell; GO:0005737 cytoplasm; GO:0009295 nucleoid; GO:0009507 chloroplast; GO:0009532 plastid stroma; GO:0009534 chloroplast thylakoid; GO:0009536 plastid; GO:0009570 chloroplast stroma; GO:0009579 thylakoid; GO:0031976 plastid thylakoid; GO:0031984 organelle subcompartment; GO:0043226 organelle; GO:0043227 membrane-bounded organelle; GO:0043229 intracellular or…	GO:0003824 catalytic activity; GO:0003899 DNA-directed 5'-3' RNA polymerase activity; GO:0016740 transferase activity; GO:0016772 transferase activity, transferring phosphorus-containing groups; GO:0016779 nucleotidyltransferase activity; GO:0034062 5'-3' RNA polymerase activity; GO:0097747 RNA polymerase activity;	K03040	rpoA; DNA-directed RNA polymerase subunit alpha [EC:2.7.7.6]	cann03020 RNA polymerase	PF01193; PF01000; PF03118	RNA polymerase Rpb3/Rpb11 dimerisation domain; RNA polymerase Rpb3/RpoA insert domain; Bacterial RNA polymerase, alpha chain C terminal domain
Capana01g000010	"SSG1_SOLTU Granule-bound starch synthase 1, chloroplastic/amyloplastic OS=Solanum tuberosum GN=WAXY PE=1 SV=1"	11.061	Up	0.0025973	WAXY	60.965	37.5	112	13	12	0	32384	58434	98626	75951	87632	554790	399310	552360	297470	185310	210220	39870	0	0	391660	401600	385250	467020	429160	394170	388390	332290	348590	chloroplast	GO:0000271 polysaccharide biosynthetic process; GO:0005975 carbohydrate metabolic process; GO:0005976 polysaccharide metabolic process; GO:0005982 starch metabolic process; GO:0006073 cellular glucan metabolic process; GO:0008152 metabolic process; GO:0009058 biosynthetic process; GO:0009059 macromolecule biosynthetic process; GO:0009250 glucan biosynthetic process; GO:0009987 cellular process; G…	GO:0005622 intracellular; GO:0005623 cell; GO:0005737 cytoplasm; GO:0009501 amyloplast; GO:0009507 chloroplast; GO:0009536 plastid; GO:0009569 chloroplast starch grain; GO:0043036 starch grain; GO:0043226 organelle; GO:0043227 membrane-bounded organelle; GO:0043229 intracellular organelle; GO:0043231 intracellular membrane-bounded organelle; GO:0044422 organelle part; GO:0044424 intracellular par…	GO:0000166 nucleotide binding; GO:0003824 catalytic activity; GO:0004373 glycogen (starch) synthase activity; GO:0005488 binding; GO:0008194 UDP-glycosyltransferase activity; GO:0009011 starch synthase activity; GO:0016740 transferase activity; GO:0016757 transferase activity, transferring glycosyl groups; GO:0016758 transferase activity, transferring hexosyl groups; GO:0017076 purine nucleotide …	K13679	WAXY; granule-bound starch synthase [EC:2.4.1.242]	cann00500 Starch and sucrose metabolism; cann01100 Metabolic pathways; cann01110 Biosynthesis of secondary metabolites	PF08323	Starch synthase catalytic domain
Capana01g000193	GOGC6_ARATH Golgin candidate 6 OS=Arabidopsis thaliana GN=GC6 PE=1 SV=2	1.746	Up	0.0001031	GC6	98.913	15.5	67	9	9	135510	147240	131660	128050	140680	124680	247290	240870	235420	118160	90542	74769	177360	155790	167660	190910	211890	209900	287450	274750	277780	64869	46122	60745	chloroplast	GO:0006810 transport; GO:0006886 intracellular protein transport; GO:0006888 ER to Golgi vesicle-mediated transport; GO:0007275 multicellular organism development; GO:0008104 protein localization; GO:0009791 post-embryonic development; GO:0009987 cellular process; GO:0015031 protein transport; GO:0015833 peptide transport; GO:0016043 cellular component organization; GO:0016192 vesicle-mediated tr…	GO:0005622 intracellular; GO:0005623 cell; GO:0005737 cytoplasm; GO:0005783 endoplasmic reticulum; GO:0005794 Golgi apparatus; GO:0005795 Golgi stack; GO:0005798 Golgi-associated vesicle; GO:0005829 cytosol; GO:0012505 endomembrane system; GO:0012506 vesicle membrane; GO:0012507 ER to Golgi transport vesicle membrane; GO:0016020 membrane; GO:0030133 transport vesicle; GO:0030134 ER to Golgi trans…	GO:0005215 transporter activity; GO:0008565 protein transporter activity;
Capana01g000219	GSTT1_ARATH Glutathione S-transferase T1 OS=Arabidopsis thaliana GN=GSTT1 PE=2 SV=1	0.64	Down	0.0043224	GSTT1	28.348	40.8	61	6	5	174530	158980	173540	174630	170400	166150	93384	114860	116330	118450	122790	116920	107170	102980	103160	101240	97738	87152	77877	77517	72933	120830	132650	127850	chloroplast	GO:0006518 peptide metabolic process; GO:0006575 cellular modified amino acid metabolic process; GO:0006749 glutathione metabolic process; GO:0006790 sulfur compound metabolic process; GO:0006807 nitrogen compound metabolic process; GO:0008152 metabolic process; GO:0009056 catabolic process; GO:0009404 toxin metabolic process; GO:0009407 toxin catabolic process; GO:0009636 response to toxic subst…	GO:0005622 intracellular; GO:0005623 cell; GO:0005737 cytoplasm; GO:0005777 peroxisome; GO:0042579 microbody; GO:0043226 organelle; GO:0043227 membrane-bounded organelle; GO:0043229 intracellular organelle; GO:0043231 intracellular membrane-bounded organelle; GO:0044424 intracellular part; GO:0044444 cytoplasmic part; GO:0044464 cell part;	GO:0003824 catalytic activity; GO:0004364 glutathione transferase activity; GO:0016740 transferase activity; GO:0016765 transferase activity, transferring alkyl or aryl (other than methyl) groups;	K00799	GST, gst; glutathione S-transferase [EC:2.5.1.18]	cann00480 Glutathione metabolism; cann01100 Metabolic pathways	PF02798	Glutathione S-transferase, N-terminal domain
Capana01g000351	HMCS_ARATH Hydroxymethylglutaryl-CoA synthase OS=Arabidopsis thaliana GN=HMGS PE=2 SV=2	0.515	Down	3.6649e-05	HMGS	53.662	31.2	97	10	8	366030	336000	339760	376370	343150	348710	174650	176900	185230	298020	205170	245560	332080	334380	299550	280160	323200	293150	219420	189450	202940	415970	438460	454530	chloroplast	GO:0006084 acetyl-CoA metabolic process; GO:0006139 nucleobase-containing compound metabolic process; GO:0006163 purine nucleotide metabolic process; GO:0006629 lipid metabolic process; GO:0006637 acyl-CoA metabolic process; GO:0006644 phospholipid metabolic process; GO:0006720 isoprenoid metabolic process; GO:0006725 cellular aromatic compound metabolic process; GO:0006732 coenzyme metabolic pro…	GO:0005622 intracellular; GO:0005623 cell; GO:0005737 cytoplasm; GO:0005829 cytosol; GO:0005911 cell-cell junction; GO:0009506 plasmodesma; GO:0030054 cell junction; GO:0044424 intracellular part; GO:0044444 cytoplasmic part; GO:0044464 cell part; GO:0055044 symplast;	GO:0003824 catalytic activity; GO:0004421 hydroxymethylglutaryl-CoA synthase activity; GO:0016740 transferase activity; GO:0016746 transferase activity, transferring acyl groups; GO:0046912 transferase activity, transferring acyl groups, acyl groups converted into alkyl on transfer;	K01641	E2.3.3.10; hydroxymethylglutaryl-CoA synthase [EC:2.3.3.10]	cann00072 Synthesis and degradation of ketone bodies; cann00280 Valine, leucine and isoleucine degradation; cann00650 Butanoate metabolism; cann00900 Terpenoid backbone biosynthesis; cann01100 Metabolic pathways; cann01110 Biosynthesis of secondary metabolites	PF01154; PF08540	Hydroxymethylglutaryl-coenzyme A synthase N terminal; Hydroxymethylglutaryl-coenzyme A synthase C terminal
Capana01g000414	"CLP41_ARATH Clp protease-related protein At4g12060, chloroplastic OS=Arabidopsis thaliana GN=At4g12060 PE=1 SV=1"	1.722	Up	0.042397	At4g12060	25.97	42.9	113	7	7	220890	282050	417400	353480	425400	469090	578800	539140	468030	771550	737090	741600	433050	547530	581280	350250	409920	596700	486470	701510	662030	1320700	1055100	924800	chloroplast		GO:0005622 intracellular; GO:0005623 cell; GO:0005737 cytoplasm; GO:0009507 chloroplast; GO:0009526 plastid envelope; GO:0009532 plastid stroma; GO:0009536 plastid; GO:0009570 chloroplast stroma; GO:0009941 chloroplast envelope; GO:0031967 organelle envelope; GO:0031975 envelope; GO:0043226 organelle; GO:0043227 membrane-bounded organelle; GO:0043229 intracellular organelle; GO:0043231 intracellu…	GO:0005488 binding; GO:0005515 protein binding; GO:0019899 enzyme binding; GO:0019900 kinase binding; GO:0019901 protein kinase binding; GO:0043424 protein histidine kinase binding;
Capana01g000463	SDD1_ARATH Subtilisin-like protease SDD1 OS=Arabidopsis thaliana GN=SDD1 PE=2 SV=1	0.662	Down	0.000100471	SDD1	74.947	34.9	170	14	12	450810	414790	422010	441640	425100	446690	280960	288020	283120	327760	329850	346240	406590	418090	418320	441810	448970	409670	386550	371150	372320	578830	717230	677210	cytoskeleton							PF05922; PF00082	Peptidase inhibitor I9; Subtilase family
Capana01g000496	F10AL_ARATH FAM10 family protein At4g22670 OS=Arabidopsis thaliana GN=At4g22670 PE=1 SV=1	1.506	Up	0.0132351	At4g22670	44.515	34.5	205	14	14	777660	875240	911910	924450	930920	965210	1291800	1285900	1286600	516650	487130	489920	1238800	1195400	1168800	1148100	1277800	1291900	1837500	1823200	1897900	474310	467330	452190	nucleus	GO:0010035 response to inorganic substance; GO:0010038 response to metal ion; GO:0042221 response to chemical; GO:0046686 response to cadmium ion; GO:0050896 response to stimulus;	GO:0005622 intracellular; GO:0005623 cell; GO:0005737 cytoplasm; GO:0005829 cytosol; GO:0044424 intracellular part; GO:0044444 cytoplasmic part; GO:0044464 cell part;		K09560	ST13; suppressor of tumorigenicity protein 13
Capana01g000550	14KD_DAUCA 14 kDa proline-rich protein DC2.15 OS=Daucus carota PE=2 SV=1	1.713	Up	0.00062422	---	14.46	27.3	59	3	3	413730	388470	435270	554350	512780	514600	733910	740220	644860	553450	554820	584980	613280	687020	694510	780680	781160	843920	841210	807480	840790	1189800	1006400	1131300	extracellular
Capana01g000612	Putative mucin-19-like	0.557	Down	0.004244	---	230.57	14.7	127	19	19	249920	206620	205520	196680	196240	176930	110100	116860	141910	158050	157570	181200	172700	217240	194490	232310	232580	209070	222000	201540	205590	177330	174500	187880	nucleus							PF05641	Agenet domain
Capana01g000687	HABP4_PAI-RBP1 domain-containing protein	0.66	Down	0.00062066	---	41.926	38.2	174	13	11	1785500	1661500	1640100	1552700	1500000	1476600	1045300	1149500	1161700	2138700	2085700	2047400	1473000	1525700	1459300	1649400	1460400	1399800	1609100	1653200	1590600	1402300	1517000	1404000	nucleus	GO:0001101 response to acid chemical; GO:0006950 response to stress; GO:0006970 response to osmotic stress; GO:0009628 response to abiotic stimulus; GO:0009651 response to salt stress; GO:0009719 response to endogenous stimulus; GO:0009725 response to hormone; GO:0009735 response to cytokinin; GO:0009737 response to abscisic acid; GO:0009787 regulation of abscisic acid-activated signaling pathway…	GO:0005622 intracellular; GO:0005623 cell; GO:0005634 nucleus; GO:0005737 cytoplasm; GO:0005777 peroxisome; GO:0005829 cytosol; GO:0005886 plasma membrane; GO:0016020 membrane; GO:0042579 microbody; GO:0043226 organelle; GO:0043227 membrane-bounded organelle; GO:0043229 intracellular organelle; GO:0043231 intracellular membrane-bounded organelle; GO:0044424 intracellular part; GO:0044444 cytoplas…	GO:0003676 nucleic acid binding; GO:0003723 RNA binding; GO:0003729 mRNA binding; GO:0005488 binding; GO:0097159 organic cyclic compound binding; GO:1901363 heterocyclic compound binding;	K13199	SERBP1; plasminogen activator inhibitor 1 RNA-binding protein
Capana01g001054	ESCA_ARATH Putative DNA-binding protein ESCAROLA OS=Arabidopsis thaliana GN=ESC PE=2 SV=1	0.626	Down	0.0037647	ESC	28.307	23.6	28	4	4	48975	50144	57307	40124	45005	42490	30718	30459	36641	41975	51728	51286	46254	46272	40341	35748	39033	44556	31698	0	0	79156	96060	92373	nucleus		GO:0005622 intracellular; GO:0005623 cell; GO:0005737 cytoplasm; GO:0005829 cytosol; GO:0044424 intracellular part; GO:0044444 cytoplasmic part; GO:0044464 cell part;					PF03479	Domain of unknown function (DUF296)
Capana01g001093	AGD8_ARATH Probable ADP-ribosylation factor GTPase-activating protein AGD8 OS=Arabidopsis thaliana GN=AGD8 PE=1 SV=1	0.642	Down	0.0085021	AGD8	38.998	19	87	5	4	148420	143200	138320	159170	149360	150280	109270	81192	85629	206340	177920	182590	182160	177180	168640	153350	142730	145470	143620	121230	134530	181120	180340	169740	nucleus	GO:0000003 reproduction; GO:0001101 response to acid chemical; GO:0003006 developmental process involved in reproduction; GO:0007275 multicellular organism development; GO:0009555 pollen development; GO:0009719 response to endogenous stimulus; GO:0009725 response to hormone; GO:0009737 response to abscisic acid; GO:0009790 embryo development; GO:0009791 post-embryonic development; GO:0009793 embr…	GO:0005622 intracellular; GO:0005623 cell; GO:0005737 cytoplasm; GO:0005829 cytosol; GO:0044424 intracellular part; GO:0044444 cytoplasmic part; GO:0044464 cell part;		K12493	ARFGAP2_3; ADP-ribosylation factor GTPase-activating protein 2/3	cann04144 Endocytosis	PF01412	Putative GTPase activating protein for Arf
Capana01g001122	"PG1_PEA Plastoglobulin-1, chloroplastic OS=Pisum sativum GN=PG1 PE=1 SV=1"	1.747	Up	0.025804	PG1	17.585	27	31	3	3	107360	82438	90651	50138	0	0	183080	0	143460	70213	130210	43709	122580	110880	68222	52690	175420	139980	33005	81674	148660	0	101150	165030	chloroplast
Capana01g001179	"PPOF_SOLLC Polyphenol oxidase F, chloroplastic OS=Solanum lycopersicum PE=3 SV=1"	0.324	Down	0.00149988	---	66.077	22.3	68	8	8	262920	213010	223100	417830	431210	421850	87949	81150	57120	225750	277940	284020	128020	123520	126220	89132	92749	101780	110580	119420	116240	216780	234880	215350	chloroplast		GO:0005622 intracellular; GO:0005623 cell; GO:0005737 cytoplasm; GO:0009507 chloroplast; GO:0009534 chloroplast thylakoid; GO:0009536 plastid; GO:0009543 chloroplast thylakoid lumen; GO:0009579 thylakoid; GO:0031976 plastid thylakoid; GO:0031977 thylakoid lumen; GO:0031978 plastid thylakoid lumen; GO:0031984 organelle subcompartment; GO:0043226 organelle; GO:0043227 membrane-bounded organelle; GO…		K00422	E1.10.3.1; polyphenol oxidase [EC:1.10.3.1]	cann00350 Tyrosine metabolism; cann00950 Isoquinoline alkaloid biosynthesis; cann01100 Metabolic pathways; cann01110 Biosynthesis of secondary metabolites	PF00264; PF12142; PF12143	Common central domain of tyrosinase; Polyphenol oxidase middle domain; Protein of unknown function (DUF_B2219)
Capana01g001419	FLA10_ARATH Fasciclin-like arabinogalactan protein 10 OS=Arabidopsis thaliana GN=FLA10 PE=1 SV=1	1.799	Up	7.5393e-05	FLA10	43.728	26.7	113	6	6	300290	290570	286380	320690	303630	323250	550610	532580	494750	503780	522430	522240	300290	272590	327810	308700	287720	314350	542350	554870	550780	855690	835990	828970	plasma membrane		GO:0005576 extracellular region; GO:0005618 cell wall; GO:0005623 cell; GO:0005886 plasma membrane; GO:0009505 plant-type cell wall; GO:0016020 membrane; GO:0030312 external encapsulating structure; GO:0031224 intrinsic component of membrane; GO:0031225 anchored component of membrane; GO:0031226 intrinsic component of plasma membrane; GO:0044425 membrane part; GO:0044459 plasma membrane part; GO:…					PF02469	Fasciclin domain
Capana01g001469	SOT16_ARATH Sulfotransferase 16 OS=Arabidopsis thaliana GN=SOT16 PE=1 SV=1	0.617	Down	0.0029389	SOT16	39.664	28.1	56	6	6	312610	299560	365040	380710	324900	311180	183930	209830	209500	154180	162120	152510	164610	169310	312310	142230	133420	142190	136120	231580	138100	133830	167000	151570	nucleus	GO:0001101 response to acid chemical; GO:0002376 immune system process; GO:0006082 organic acid metabolic process; GO:0006790 sulfur compound metabolic process; GO:0006807 nitrogen compound metabolic process; GO:0006950 response to stress; GO:0006952 defense response; GO:0006955 immune response; GO:0008152 metabolic process; GO:0009058 biosynthetic process; GO:0009605 response to external stimulu…		GO:0003824 catalytic activity; GO:0008146 sulfotransferase activity; GO:0016740 transferase activity; GO:0016782 transferase activity, transferring sulfur-containing groups; GO:0047364 desulfoglucosinolate sulfotransferase activity; GO:0080066 3-methylthiopropyl-desulfoglucosinolate sulfotransferase activity; GO:0080067 4-methylthiobutyl-desulfoglucosinolate sulfotransferase activity; GO:0080068 …				PF00685	Sulfotransferase domain
Capana01g001866	PSBD_VITVI Photosystem II D2 protein OS=Vitis vinifera GN=psbD PE=3 SV=1	0.639	Down	0.00081588	psbD	15.376	12.4	147	2	2	1055900	986700	915200	1027500	989390	928310	622230	606160	662880	741260	742980	742050	976230	989030	966040	937360	843070	789410	574190	589200	552970	967940	1046600	1088400	mitochondria				K02706	psbD; photosystem II P680 reaction center D2 protein [EC:1.10.3.9]	cann00195 Photosynthesis; cann01100 Metabolic pathways
Capana01g002007	"CP20B_ARATH Peptidyl-prolyl cis-trans isomerase CYP20-2, chloroplastic OS=Arabidopsis thaliana GN=CYP20-2 PE=1 SV=1"	1.628	Up	0.0029784	CYP20-2	26.709	50.4	230	10	10	2164900	2580800	2783000	3337400	3391500	3531200	4175200	4129900	3946700	4681100	5052900	4463200	3495700	3168900	3497200	2649500	2825800	3133800	3028800	3253400	3595700	5780200	5814500	5395100	chloroplast	GO:0000413 protein peptidyl-prolyl isomerization; GO:0006464 cellular protein modification process; GO:0006807 nitrogen compound metabolic process; GO:0008152 metabolic process; GO:0009987 cellular process; GO:0010275 NAD(P)H dehydrogenase complex assembly; GO:0016043 cellular component organization; GO:0018193 peptidyl-amino acid modification; GO:0018208 peptidyl-proline modification; GO:0019538…	GO:0005622 intracellular; GO:0005623 cell; GO:0005737 cytoplasm; GO:0009507 chloroplast; GO:0009532 plastid stroma; GO:0009533 chloroplast stromal thylakoid; GO:0009534 chloroplast thylakoid; GO:0009535 chloroplast thylakoid membrane; GO:0009536 plastid; GO:0009570 chloroplast stroma; GO:0009579 thylakoid; GO:0016020 membrane; GO:0031976 plastid thylakoid; GO:0031977 thylakoid lumen; GO:0031984 o…	GO:0003755 peptidyl-prolyl cis-trans isomerase activity; GO:0003824 catalytic activity; GO:0005488 binding; GO:0005515 protein binding; GO:0016853 isomerase activity; GO:0016859 cis-trans isomerase activity; GO:0019899 enzyme binding; GO:0019900 kinase binding; GO:0019901 protein kinase binding; GO:0043424 protein histidine kinase binding;	K03768	PPIB, ppiB; peptidyl-prolyl cis-trans isomerase B (cyclophilin B) [EC:5.2.1.8]		PF00160	Cyclophilin type peptidyl-prolyl cis-trans isomerase/CLD
Capana01g002050	YTHD2_HUMAN YTH domain family protein 2 OS=Homo sapiens GN=YTHDF2 PE=1 SV=2	0.502	Down	0.0044007	YTHDF2	77.211	25.9	90	13	10	309530	306560	306860	248520	245950	247600	163600	159080	140900	214520	234500	212740	246690	272360	244110	240050	234140	258470	246130	228840	219410	262750	310490	297030	nucleus				K20102	YTHDF; YTH domain-containing family protein		PF04146	YT521-B-like domain
Capana01g002225	RS6_LARHH 30S ribosomal protein S6 OS=Laribacter hongkongensis (strain HLHK9) GN=rpsF PE=3 SV=1	1.601	Up	4.9992e-06	rpsF	34.778	20.6	37	3	3	109600	110950	111920	83083	82931	102730	172150	178380	181710	133370	141900	117910	89202	88520	88606	89528	91068	85006	104830	160160	157060	0	0	0	nucleus							PF01250	Ribosomal protein S6
Capana01g002431	"AKH_DAUCA Bifunctional aspartokinase/homoserine dehydrogenase, chloroplastic (Fragment) OS=Daucus carota PE=1 SV=1"	0.618	Down	0.0070587	---	52.961	24.8	21	8	4	110560	97885	93896	56049	71429	51942	55554	58651	72654	63436	75337	65492	68032	74707	76247	67885	52126	51810	40689	51133	50798	35169	36589	21365	cytoplasm	GO:0006082 organic acid metabolic process; GO:0006520 cellular amino acid metabolic process; GO:0006793 phosphorus metabolic process; GO:0006796 phosphate-containing compound metabolic process; GO:0006807 nitrogen compound metabolic process; GO:0008152 metabolic process; GO:0008652 cellular amino acid biosynthetic process; GO:0009058 biosynthetic process; GO:0009069 serine family amino acid metab…	GO:0005622 intracellular; GO:0005623 cell; GO:0005737 cytoplasm; GO:0009507 chloroplast; GO:0009532 plastid stroma; GO:0009536 plastid; GO:0009570 chloroplast stroma; GO:0043226 organelle; GO:0043227 membrane-bounded organelle; GO:0043229 intracellular organelle; GO:0043231 intracellular membrane-bounded organelle; GO:0044422 organelle part; GO:0044424 intracellular part; GO:0044434 chloroplast p…	GO:0003824 catalytic activity; GO:0004072 aspartate kinase activity; GO:0004412 homoserine dehydrogenase activity; GO:0016301 kinase activity; GO:0016491 oxidoreductase activity; GO:0016614 oxidoreductase activity, acting on CH-OH group of donors; GO:0016616 oxidoreductase activity, acting on the CH-OH group of donors, NAD or NADP as acceptor; GO:0016740 transferase activity; GO:0016772 transfera…	K12524	thrA; bifunctional aspartokinase / homoserine dehydrogenase 1 [EC:2.7.2.4 1.1.1.3]	cann00260 Glycine, serine and threonine metabolism; cann00261 Monobactam biosynthesis; cann00270 Cysteine and methionine metabolism; cann00300 Lysine biosynthesis; cann01100 Metabolic pathways; cann01110 Biosynthesis of secondary metabolites; cann01230 Biosynthesis of amino acids	PF13840; PF03447; PF00742	Family description; Homoserine dehydrogenase, NAD binding domain; Homoserine dehydrogenase
Capana01g002611	CESA3_ARATH Cellulose synthase A catalytic subunit 3 [UDP-forming] OS=Arabidopsis thaliana GN=CESA3 PE=1 SV=2	0.629	Down	0.0069801	CESA3	120.98	15.1	31	11	9	160470	139160	186920	126420	150720	139930	98748	107810	99319	75842	74101	0	161660	154760	149950	123180	162270	109950	79626	99847	116650	140690	102900	67553	plasma membrane	GO:0000271 polysaccharide biosynthetic process; GO:0000278 mitotic cell cycle; GO:0000281 mitotic cytokinesis; GO:0000910 cytokinesis; GO:0005975 carbohydrate metabolic process; GO:0005976 polysaccharide metabolic process; GO:0006073 cellular glucan metabolic process; GO:0006950 response to stress; GO:0006952 defense response; GO:0007049 cell cycle; GO:0008152 metabolic process; GO:0009058 biosyn…	GO:0005622 intracellular; GO:0005623 cell; GO:0005737 cytoplasm; GO:0005768 endosome; GO:0005794 Golgi apparatus; GO:0005802 trans-Golgi network; GO:0005886 plasma membrane; GO:0005911 cell-cell junction; GO:0009506 plasmodesma; GO:0012505 endomembrane system; GO:0016020 membrane; GO:0030054 cell junction; GO:0031410 cytoplasmic vesicle; GO:0031982 vesicle; GO:0031984 organelle subcompartment; GO…	GO:0003824 catalytic activity; GO:0016740 transferase activity; GO:0016757 transferase activity, transferring glycosyl groups; GO:0016758 transferase activity, transferring hexosyl groups; GO:0016759 cellulose synthase activity; GO:0046527 glucosyltransferase activity;	K10999	CESA; cellulose synthase A [EC:2.4.1.12]
Capana01g002641	SMT1_ORYSJ Cycloartenol-C-24-methyltransferase 1 OS=Oryza sativa subsp. japonica GN=Smt1-1 PE=2 SV=1	0.542	Down	0.00137756	Smt1-1	28.777	42.1	69	8	8	175450	146400	139100	144880	134720	139280	81784	88376	79688	141630	121640	106230	131800	148490	161890	114230	163290	130180	96730	113410	106660	233430	217910	232390	cytoplasm	GO:0000003 reproduction; GO:0003006 developmental process involved in reproduction; GO:0006629 lipid metabolic process; GO:0006694 steroid biosynthetic process; GO:0007275 multicellular organism development; GO:0008152 metabolic process; GO:0008202 steroid metabolic process; GO:0008610 lipid biosynthetic process; GO:0009058 biosynthetic process; GO:0009790 embryo development; GO:0009791 post-embr…	GO:0005622 intracellular; GO:0005623 cell; GO:0005737 cytoplasm; GO:0005773 vacuole; GO:0005783 endoplasmic reticulum; GO:0005911 cell-cell junction; GO:0009506 plasmodesma; GO:0012505 endomembrane system; GO:0030054 cell junction; GO:0043226 organelle; GO:0043227 membrane-bounded organelle; GO:0043229 intracellular organelle; GO:0043231 intracellular membrane-bounded organelle; GO:0044424 intrac…	GO:0003824 catalytic activity; GO:0003838 sterol 24-C-methyltransferase activity; GO:0008168 methyltransferase activity; GO:0008169 C-methyltransferase activity; GO:0008757 S-adenosylmethionine-dependent methyltransferase activity; GO:0016740 transferase activity; GO:0016741 transferase activity, transferring one-carbon groups;	K00559	E2.1.1.41, SMT1, ERG6; sterol 24-C-methyltransferase [EC:2.1.1.41]	cann00100 Steroid biosynthesis; cann01100 Metabolic pathways; cann01110 Biosynthesis of secondary metabolites
Capana01g002684	NAA11_MOUSE N-alpha-acetyltransferase 11 OS=Mus musculus GN=Naa11 PE=2 SV=1	0.514	Down	0.00162089	Naa11	16.849	20.5	32	2	2	55741	47494	52564	53543	50432	57697	0	26657	26775	21264	23687	0	39172	39067	0	0	0	0	0	0	0	0	0	23939	cytoplasm	GO:0000003 reproduction; GO:0001101 response to acid chemical; GO:0003006 developmental process involved in reproduction; GO:0006464 cellular protein modification process; GO:0006473 protein acetylation; GO:0006474 N-terminal protein amino acid acetylation; GO:0006475 internal protein amino acid acetylation; GO:0006807 nitrogen compound metabolic process; GO:0006950 response to stress; GO:0007275…	GO:0005622 intracellular; GO:0005623 cell; GO:0005737 cytoplasm; GO:0005829 cytosol; GO:0005840 ribosome; GO:0022626 cytosolic ribosome; GO:0031248 protein acetyltransferase complex; GO:0031414 N-terminal protein acetyltransferase complex; GO:0031415 NatA complex; GO:0032991 macromolecular complex; GO:0043226 organelle; GO:0043228 non-membrane-bounded organelle; GO:0043229 intracellular organelle…	GO:0003824 catalytic activity; GO:0004596 peptide alpha-N-acetyltransferase activity; GO:0008080 N-acetyltransferase activity; GO:0016407 acetyltransferase activity; GO:0016410 N-acyltransferase activity; GO:0016740 transferase activity; GO:0016746 transferase activity, transferring acyl groups; GO:0016747 transferase activity, transferring acyl groups other than amino-acyl groups; GO:0034212 pep…	K20791	NAA10_11, ARD1_2; N-alpha-acetyltransferase 10/11 [EC:2.3.1.255]
Capana01g002783	AQR_HUMAN Intron-binding protein aquarius OS=Homo sapiens GN=AQR PE=1 SV=4	2.567	Up	0.023185	AQR	175.5	10	26	8	8	33696	0	24419	0	29526	0	60866	66457	96313	45451	46268	37173	0	28669	0	60657	64227	60303	129160	125780	107640	0	0	0	cytoplasm				K12874	AQR; intron-binding protein aquarius	cann03040 Spliceosome	PF13086; PF13087	AAA domain; AAA domain
Capana01g002904	RAGP2_ARATH RAN GTPase-activating protein 2 OS=Arabidopsis thaliana GN=RANGAP2 PE=1 SV=2	1.787	Up	0.00190046	RANGAP2	57.158	42.8	94	12	12	108880	120570	133650	148430	132270	151710	229520	193750	225370	86864	86440	107250	204300	205130	200510	275300	289030	292400	426380	442260	434690	122270	121700	105840	chloroplast	GO:0006810 transport; GO:0006913 nucleocytoplasmic transport; GO:0006950 response to stress; GO:0006970 response to osmotic stress; GO:0009628 response to abiotic stimulus; GO:0009651 response to salt stress; GO:0046907 intracellular transport; GO:0050896 response to stimulus; GO:0051169 nuclear transport; GO:0051179 localization; GO:0051234 establishment of localization; GO:0051641 cellular loca…	GO:0005622 intracellular; GO:0005623 cell; GO:0005634 nucleus; GO:0005635 nuclear envelope; GO:0005737 cytoplasm; GO:0005773 vacuole; GO:0005774 vacuolar membrane; GO:0005783 endoplasmic reticulum; GO:0005819 spindle; GO:0005856 cytoskeleton; GO:0009507 chloroplast; GO:0009524 phragmoplast; GO:0009536 plastid; GO:0012505 endomembrane system; GO:0015630 microtubule cytoskeleton; GO:0016020 membran…		K14319	RANGAP1; Ran GTPase-activating protein 1	cann03013 RNA transport	PF13943	WPP domain
Capana01g002948	7SB1_SOYBN Basic 7S globulin OS=Glycine max GN=BG PE=1 SV=2	0.662	Down	0.00088195	BG	46.874	33.6	100	8	8	181480	203260	205170	239880	256750	261120	124820	135650	129500	298730	301390	280420	171850	179510	181060	142410	148910	136720	108590	117220	108960	349010	321690	329170	chloroplast
Capana01g003067	"PPDK_MESCR Pyruvate, phosphate dikinase, chloroplastic OS=Mesembryanthemum crystallinum GN=PPD PE=2 SV=1"	1.658	Up	1.67313e-05	PPD	100.6	34.9	253	23	22	700090	683230	660340	531550	527690	536290	1122000	1152600	1115600	721730	713820	735660	804060	753090	782120	1129800	1093200	1090000	1208000	1187700	1164800	605590	589150	591960	chloroplast		GO:0005622 intracellular; GO:0005623 cell; GO:0005634 nucleus; GO:0005737 cytoplasm; GO:0005829 cytosol; GO:0009507 chloroplast; GO:0009532 plastid stroma; GO:0009536 plastid; GO:0009570 chloroplast stroma; GO:0043226 organelle; GO:0043227 membrane-bounded organelle; GO:0043229 intracellular organelle; GO:0043231 intracellular membrane-bounded organelle; GO:0044422 organelle part; GO:0044424 intr…		K01006	ppdK; pyruvate, orthophosphate dikinase [EC:2.7.9.1]	cann00620 Pyruvate metabolism; cann00710 Carbon fixation in photosynthetic organisms; cann01100 Metabolic pathways; cann01200 Carbon metabolism	PF02896	PEP-utilising enzyme, TIM barrel domain
Capana01g003099	XT1_ARATH Xyloglucan 6-xylosyltransferase OS=Arabidopsis thaliana GN=XT1 PE=1 SV=1	0.536	Down	0.0024399	XT1	53.312	14.1	36	4	4	61527	57697	55756	59981	54347	47804	36958	28487	28229	48124	0	0	47492	44587	47497	51431	37083	41782	0	25538	28077	28885	44691	36191	mitochondria				K08238	XXT; xyloglucan 6-xylosyltransferase [EC:2.4.2.39]
Capana01g003113	SODC_CAPAN Superoxide dismutase [Cu-Zn] OS=Capsicum annuum GN=SODCC PE=2 SV=1	0.395	Down	6.2895e-05	SODCC	15.442	38.8	75	3	3	808210	862680	737480	1461200	1592400	1129000	329310	322060	299240	1106300	1412600	1072200	262360	272310	315490	256280	166170	200730	379580	260450	372600	666370	703970	705850	cytoplasm	GO:0000302 response to reactive oxygen species; GO:0000303 response to superoxide; GO:0000305 response to oxygen radical; GO:0001101 response to acid chemical; GO:0006801 superoxide metabolic process; GO:0006950 response to stress; GO:0006952 defense response; GO:0006970 response to osmotic stress; GO:0006979 response to oxidative stress; GO:0008152 metabolic process; GO:0009314 response to radia…	GO:0005576 extracellular region; GO:0005615 extracellular space; GO:0005622 intracellular; GO:0005623 cell; GO:0005634 nucleus; GO:0005737 cytoplasm; GO:0005829 cytosol; GO:0043226 organelle; GO:0043227 membrane-bounded organelle; GO:0043229 intracellular organelle; GO:0043231 intracellular membrane-bounded organelle; GO:0044421 extracellular region part; GO:0044424 intracellular part; GO:0044444…	GO:0003824 catalytic activity; GO:0004784 superoxide dismutase activity; GO:0005488 binding; GO:0005507 copper ion binding; GO:0008270 zinc ion binding; GO:0016209 antioxidant activity; GO:0016491 oxidoreductase activity; GO:0016721 oxidoreductase activity, acting on superoxide radicals as acceptor; GO:0043167 ion binding; GO:0043169 cation binding; GO:0046872 metal ion binding; GO:0046914 transi…	K04565	SOD1; superoxide dismutase, Cu-Zn family [EC:1.15.1.1]	cann04146 Peroxisome	PF00080	Copper/zinc superoxide dismutase (SODC)
Capana01g003154	SNF4_ARATH Sucrose nonfermenting 4-like protein OS=Arabidopsis thaliana GN=SNF4 PE=1 SV=1	0.579	Down	0.01006	SNF4	52.846	18.9	60	5	5	166100	140020	142770	153450	135330	126220	78649	75256	106080	97599	51434	121950	122680	152760	122050	122190	102550	106970	110320	92121	70185	139860	155740	147450	cytoplasm	GO:0000003 reproduction; GO:0000266 mitochondrial fission; GO:0001932 regulation of protein phosphorylation; GO:0001934 positive regulation of protein phosphorylation; GO:0006464 cellular protein modification process; GO:0006468 protein phosphorylation; GO:0006793 phosphorus metabolic process; GO:0006796 phosphate-containing compound metabolic process; GO:0006807 nitrogen compound metabolic proce…		GO:0003824 catalytic activity; GO:0004672 protein kinase activity; GO:0004674 protein serine/threonine kinase activity; GO:0008047 enzyme activator activity; GO:0016301 kinase activity; GO:0016740 transferase activity; GO:0016772 transferase activity, transferring phosphorus-containing groups; GO:0016773 phosphotransferase activity, alcohol group as acceptor; GO:0019207 kinase regulator activity;…				PF00571	CBS domain
Capana01g003369	Putative polyadenylate-binding protein 1-B-binding protein-like	0.363	Down	0.015436	---	37.03	11.1	24	2	2	72514	62576	50441	37056	79980	68625	17925	0	26985	31551	0	20094	39530	37740	63466	35406	57966	74651	0	36724	34501	99072	104810	47612	plasma membrane
Capana01g003478	PCBP4_BOVIN Poly(rC)-binding protein 4 OS=Bos taurus GN=PCBP4 PE=2 SV=1	0.623	Down	0.0045956	PCBP4	38.451	16.9	39	3	3	85315	78268	69560	71539	65250	67831	44543	53927	46773	55267	45205	46688	47922	54830	0	57735	50573	50095	62462	55227	67169	39608	42946	36497	chloroplast				K21444	PCBP3_4; poly(rC)-binding protein 3/4		PF00013	KH domain
Capana01g003524	RAD2A_ARATH Ras-related protein RABD2a OS=Arabidopsis thaliana GN=RABD2A PE=1 SV=3	0.613	Down	0.0167045	RABD2A	28.31	32.7	32	5	3	108010	106760	78476	99804	104860	93466	53590	66532	59607	57572	66433	96389	99481	96400	93390	87056	97180	75437	68749	69549	63840	131920	158110	164890	extracellular				K07874	RAB1A; Ras-related protein Rab-1A		PF00071	Ras family
Capana01g003644	CPR49_ARATH GDSL esterase/lipase CPRD49 OS=Arabidopsis thaliana GN=CPRD49 PE=2 SV=1	0.636	Down	0.0145218	CPRD49	31.932	27.7	23	6	6	0	52781	58284	60889	58761	65968	36134	34489	0	47525	45645	46110	56750	48603	58651	67844	72900	53351	28399	32716	49399	70185	79975	89148	nucleus		GO:0005576 extracellular region; GO:0048046 apoplast;
Capana01g003691	DOC11_HUMAN Dedicator of cytokinesis protein 11 OS=Homo sapiens GN=DOCK11 PE=1 SV=2	1.555	Up	0.0082222	DOCK11	28.902	13.2	12	2	2	0	20082	16865	22083	0	19264	29974	28096	28084	14344	0	10388	21177	0	13137	17974	18727	19750	28325	0	23113	0	0	0	chloroplast				K21852	DOCK6_7_8; dedicator of cytokinesis protein 6/7/8
Capana01g003771	YCF1_SOLBU Putative membrane protein ycf1 OS=Solanum bulbocastanum GN=ycf1 PE=3 SV=1	1.591	Up	0.0090446	ycf1	42.655	18.3	46	5	5	64677	68951	88375	72843	101490	96228	118720	123230	111310	55799	71020	63549	86933	67283	100940	119170	94494	115660	147980	135090	143500	73865	0	0	cytoplasm	GO:0006810 transport; GO:0008104 protein localization; GO:0015031 protein transport; GO:0015833 peptide transport; GO:0033036 macromolecule localization; GO:0042886 amide transport; GO:0045184 establishment of protein localization; GO:0051179 localization; GO:0051234 establishment of localization; GO:0071702 organic substance transport; GO:0071705 nitrogen compound transport;	GO:0005622 intracellular; GO:0005623 cell; GO:0005737 cytoplasm; GO:0009507 chloroplast; GO:0009526 plastid envelope; GO:0009528 plastid inner membrane; GO:0009536 plastid; GO:0009706 chloroplast inner membrane; GO:0009941 chloroplast envelope; GO:0016020 membrane; GO:0019866 organelle inner membrane; GO:0031090 organelle membrane; GO:0031967 organelle envelope; GO:0031969 chloroplast membrane; G…	GO:0005215 transporter activity; GO:0008565 protein transporter activity;
Capana01g003908	PATA3_SOLTU Patatin group A-3 OS=Solanum tuberosum PE=2 SV=1	0.532	Down	0.0021043	---	51.013	31.4	112	8	8	156040	151770	181860	317570	314030	324860	99318	81097	80446	434710	405390	468420	384110	366130	370880	187520	183680	213570	417180	428980	453540	404870	389210	380480	cytoplasm
Capana01g003957	Y464_SYNE7 UPF0133 protein Synpcc7942_0464 OS=Synechococcus elongatus (strain PCC 7942) GN=Synpcc7942_0464 PE=3 SV=2	1.767	Up	0.003725	Synpcc7942_0464	17.164	60.4	174	7	7	401160	505600	545090	618640	618810	643520	893710	845720	826660	1078700	1060400	983620	622920	627590	634180	551650	677870	729040	994480	1019000	1010000	1174500	1093600	1064100	chloroplast
Capana01g003981	"GPX7_ARATH Putative glutathione peroxidase 7, chloroplastic OS=Arabidopsis thaliana GN=GPX7 PE=2 SV=2"	1.646	Up	0.043559	GPX7	26.537	42.7	114	8	8	1311500	725380	1102600	1208000	1268500	1209700	1865800	1633000	1665900	1579900	1913600	2021900	1236200	961130	694250	1261400	1459200	1086200	1442900	1868300	1762300	1808800	1874500	1843600	chloroplast	GO:0009628 response to abiotic stimulus; GO:0050896 response to stimulus; GO:0080167 response to karrikin;	GO:0005622 intracellular; GO:0005623 cell; GO:0005737 cytoplasm; GO:0009507 chloroplast; GO:0009526 plastid envelope; GO:0009532 plastid stroma; GO:0009534 chloroplast thylakoid; GO:0009535 chloroplast thylakoid membrane; GO:0009536 plastid; GO:0009570 chloroplast stroma; GO:0009579 thylakoid; GO:0009941 chloroplast envelope; GO:0016020 membrane; GO:0031967 organelle envelope; GO:0031975 envelope…		K00432	gpx; glutathione peroxidase [EC:1.11.1.9]	cann00480 Glutathione metabolism; cann00590 Arachidonic acid metabolism; cann01100 Metabolic pathways
Capana01g004372	HABP4_PAI-RBP1 domain-containing protein	0.628	Down	0.0028431	---	33.762	33	117	10	9	598150	501760	507750	472410	444080	428420	309160	342510	357250	620980	567400	596470	461900	430110	460610	488380	442300	425010	581540	503490	510390	305840	346100	338380	nucleus	GO:0001101 response to acid chemical; GO:0006950 response to stress; GO:0006970 response to osmotic stress; GO:0009628 response to abiotic stimulus; GO:0009651 response to salt stress; GO:0009719 response to endogenous stimulus; GO:0009725 response to hormone; GO:0009735 response to cytokinin; GO:0009737 response to abscisic acid; GO:0009787 regulation of abscisic acid-activated signaling pathway…	GO:0005622 intracellular; GO:0005623 cell; GO:0005634 nucleus; GO:0005737 cytoplasm; GO:0005777 peroxisome; GO:0005829 cytosol; GO:0005886 plasma membrane; GO:0016020 membrane; GO:0042579 microbody; GO:0043226 organelle; GO:0043227 membrane-bounded organelle; GO:0043229 intracellular organelle; GO:0043231 intracellular membrane-bounded organelle; GO:0044424 intracellular part; GO:0044444 cytoplas…	GO:0003676 nucleic acid binding; GO:0003723 RNA binding; GO:0003729 mRNA binding; GO:0005488 binding; GO:0097159 organic cyclic compound binding; GO:1901363 heterocyclic compound binding;	K13199	SERBP1; plasminogen activator inhibitor 1 RNA-binding protein
Capana02g000167	"protein COFACTOR ASSEMBLY OF COMPLEX C SUBUNIT B CCB1, chloroplastic"	1.646	Up	0.0022794	---	28.773	20.1	84	3	3	256660	275310	326380	379980	382400	386760	482970	469270	460270	242900	325360	293490	300630	380760	360130	293110	334190	363340	149970	358240	352260	390530	479980	364820	chloroplast	GO:0009987 cellular process; GO:0010190 cytochrome b6f complex assembly; GO:0016043 cellular component organization; GO:0017004 cytochrome complex assembly; GO:0022607 cellular component assembly; GO:0034622 cellular macromolecular complex assembly; GO:0043933 macromolecular complex subunit organization; GO:0044085 cellular component biogenesis; GO:0065003 macromolecular complex assembly; GO:0071…	GO:0005622 intracellular; GO:0005623 cell; GO:0005737 cytoplasm; GO:0009507 chloroplast; GO:0009536 plastid; GO:0043226 organelle; GO:0043227 membrane-bounded organelle; GO:0043229 intracellular organelle; GO:0043231 intracellular membrane-bounded organelle; GO:0044424 intracellular part; GO:0044444 cytoplasmic part; GO:0044464 cell part;
Capana02g000251	CADH6_ORYSJ Probable cinnamyl alcohol dehydrogenase 6 OS=Oryza sativa subsp. japonica GN=CAD6 PE=2 SV=2	0.56	Down	0.0025575	CAD6	39.652	36.3	114	8	7	294030	298610	253160	274750	232990	273500	137110	166700	170050	186720	191100	213230	288300	292340	264390	265660	258460	276950	220400	233560	228940	426480	395930	424150	peroxisome							PF08240	Alcohol dehydrogenase GroES-like domain
Capana02g000272	"APR3_ARATH 5'-adenylylsulfate reductase 3, chloroplastic OS=Arabidopsis thaliana GN=APR3 PE=2 SV=2"	0.362	Down	3.9866e-05	APR3	51.471	35.3	38	10	7	182320	186270	168750	105280	104280	123080	60983	63206	70197	87987	57270	69322	117140	84392	117110	69779	66171	39267	40138	53880	45253	141190	77159	102290	chloroplast	GO:0000103 sulfate assimilation; GO:0006790 sulfur compound metabolic process; GO:0008152 metabolic process; GO:0009987 cellular process; GO:0019379 sulfate assimilation, phosphoadenylyl sulfate reduction by phosphoadenylyl-sulfate reductase (thioredoxin); GO:0019419 sulfate reduction; GO:0044237 cellular metabolic process; GO:0055114 oxidation-reduction process;	GO:0005622 intracellular; GO:0005623 cell; GO:0005737 cytoplasm; GO:0009507 chloroplast; GO:0009532 plastid stroma; GO:0009536 plastid; GO:0009570 chloroplast stroma; GO:0043226 organelle; GO:0043227 membrane-bounded organelle; GO:0043229 intracellular organelle; GO:0043231 intracellular membrane-bounded organelle; GO:0044422 organelle part; GO:0044424 intracellular part; GO:0044434 chloroplast p…	GO:0003824 catalytic activity; GO:0004604 phosphoadenylyl-sulfate reductase (thioredoxin) activity; GO:0009973 adenylyl-sulfate reductase activity; GO:0016491 oxidoreductase activity; GO:0016667 oxidoreductase activity, acting on a sulfur group of donors; GO:0016671 oxidoreductase activity, acting on a sulfur group of donors, disulfide as acceptor;	K05907	APR; adenylyl-sulfate reductase (glutathione) [EC:1.8.4.9]	cann00920 Sulfur metabolism; cann01100 Metabolic pathways	PF00085	Thioredoxin
Capana02g000363	SAC1A_DANRE Phosphatidylinositide phosphatase SAC1-A OS=Danio rerio GN=sacm1la PE=2 SV=1	0.607	Down	0.0004567	sacm1la	23.1	31.8	35	4	4	105170	90728	99870	107730	107130	102010	59412	58239	62007	77156	76161	71623	94148	94203	86980	93760	93580	94742	64117	66998	65303	0	44329	51030	cytoplasm	GO:0000902 cell morphogenesis; GO:0000904 cell morphogenesis involved in differentiation; GO:0006629 lipid metabolic process; GO:0006644 phospholipid metabolic process; GO:0006650 glycerophospholipid metabolic process; GO:0006793 phosphorus metabolic process; GO:0006796 phosphate-containing compound metabolic process; GO:0006950 response to stress; GO:0006970 response to osmotic stress; GO:000727…	GO:0005622 intracellular; GO:0005623 cell; GO:0005737 cytoplasm; GO:0005783 endoplasmic reticulum; GO:0005789 endoplasmic reticulum membrane; GO:0005886 plasma membrane; GO:0005911 cell-cell junction; GO:0009506 plasmodesma; GO:0012505 endomembrane system; GO:0016020 membrane; GO:0030054 cell junction; GO:0030427 site of polarized growth; GO:0031520 plasma membrane of cell tip; GO:0031984 organel…	GO:0003824 catalytic activity; GO:0016787 hydrolase activity; GO:0016788 hydrolase activity, acting on ester bonds; GO:0016791 phosphatase activity; GO:0034596 phosphatidylinositol phosphate 4-phosphatase activity; GO:0042578 phosphoric ester hydrolase activity; GO:0043812 phosphatidylinositol-4-phosphate phosphatase activity; GO:0052744 phosphatidylinositol monophosphate phosphatase activity; GO…	K21797	SAC1, SACM1L; phosphatidylinositol 4-phosphatase [EC:3.1.3.-]	cann00562 Inositol phosphate metabolism; cann01100 Metabolic pathways; cann04070 Phosphatidylinositol signaling system
Capana02g000474	PEP_hydrolase domain-containing protein	0.639	Down	0.0048153	---	80.332	15.3	25	7	7	67657	71084	62114	74611	56489	69249	41586	48445	38245	36199	40935	39720	39108	26534	0	46770	36527	28962	30853	27167	0	0	27840	0	chloroplast							PF09370	TIM-barrel signal transduction protein
Capana02g000737	ASOL_TOBAC L-ascorbate oxidase homolog OS=Nicotiana tabacum PE=2 SV=1	0.396	Down	0.0080231	---	59.543	28.8	88	11	7	162900	168450	185910	220640	208600	221700	45056	77104	82554	150190	149850	138170	118830	122330	107020	50082	74964	83545	56307	54301	53633	245780	232570	214390	vacuolar membrane							PF07732; PF00394; PF07731	Multicopper oxidase; Multicopper oxidase; Multicopper oxidase
Capana02g000894	Y637_PELLD UPF0301 protein Plut_0637 OS=Pelodictyon luteolum (strain DSM 273) GN=Plut_0637 PE=3 SV=1	1.673	Up	0.0041618	Plut_0637	33.443	18.6	37	4	1	112440	90270	98380	196370	194430	163980	186450	151680	165540	158770	158500	144030	93859	93646	90171	168170	162020	156950	176940	166730	177200	158360	178900	220920	chloroplast				K07735	algH; putative transcriptional regulator
Capana02g000986	"CAHC_TOBAC Carbonic anhydrase, chloroplastic OS=Nicotiana tabacum PE=2 SV=1"	1.907	Up	0.0024771	---	26.755	21.8	48	4	2	49921	57116	59533	50420	68297	0	106390	0	105490	129460	129250	112830	109240	99520	117590	194580	191050	200850	135460	136520	120990	292690	216220	279670	cytoplasm				K01673	cynT, can; carbonic anhydrase [EC:4.2.1.1]	cann00910 Nitrogen metabolism; cann01100 Metabolic pathways	PF00484	Carbonic anhydrase
Capana02g001029	SNF12_ARATH SWI/SNF complex component SNF12 homolog OS=Arabidopsis thaliana GN=At5g14170 PE=1 SV=1	0.456	Down	0.00187858	At5g14170	59.83	14.9	10	5	5	111650	134320	95580	78491	68881	70006	56102	48799	50727	52159	55395	0	77203	76569	77451	59088	74735	70217	0	64760	61232	65266	54099	66972	chloroplast	GO:0006139 nucleobase-containing compound metabolic process; GO:0006259 DNA metabolic process; GO:0006281 DNA repair; GO:0006725 cellular aromatic compound metabolic process; GO:0006807 nitrogen compound metabolic process; GO:0006950 response to stress; GO:0006974 cellular response to DNA damage stimulus; GO:0007275 multicellular organism development; GO:0008152 metabolic process; GO:0009314 resp…	GO:0005622 intracellular; GO:0005623 cell; GO:0005634 nucleus; GO:0043226 organelle; GO:0043227 membrane-bounded organelle; GO:0043229 intracellular organelle; GO:0043231 intracellular membrane-bounded organelle; GO:0044424 intracellular part; GO:0044464 cell part;		K11650	SMARCD; SWI/SNF-related matrix-associated actin-dependent regulator of chromatin subfamily D		PF02201	SWIB/MDM2 domain
Capana02g001051	protein NUCLEAR FUSION DEFECTIVE 4-like	1.732	Up	0.027041	---	64.955	11.8	38	4	3	88405	89104	117110	120830	94365	109910	167240	168430	174650	104340	124640	124170	117510	84792	79514	83227	107660	111100	99768	103860	133690	112740	126890	118240	plasma membrane
Capana02g001165	ZB14_MAIZE 14 kDa zinc-binding protein OS=Zea mays GN=ZBP14 PE=1 SV=1	1.624	Up	9.6525e-07	ZBP14	19.345	44.4	122	5	5	588780	594320	572510	638400	607120	624730	954730	945870	951250	1100100	1107700	1093200	459500	474060	476940	662230	628350	627200	931110	936930	925100	1201400	1191800	1149000	chloroplast							PF01230	HIT domain
Capana02g001446	protein PLASTID TRANSCRIPTIONALLY ACTIVE 12	1.821	Up	0.00177677	---	66.546	15	47	5	5	68878	73908	81779	72808	77641	62558	152340	122280	134340	123320	93194	119430	80376	80220	48265	138980	122180	115870	173370	157580	177100	43175	31444	27138	nucleus	GO:0006139 nucleobase-containing compound metabolic process; GO:0006351 transcription, DNA-templated; GO:0006355 regulation of transcription, DNA-templated; GO:0006725 cellular aromatic compound metabolic process; GO:0006807 nitrogen compound metabolic process; GO:0008152 metabolic process; GO:0009058 biosynthetic process; GO:0009059 macromolecule biosynthetic process; GO:0009314 response to radi…	GO:0000229 cytoplasmic chromosome; GO:0000427 plastid-encoded plastid RNA polymerase complex; GO:0000428 DNA-directed RNA polymerase complex; GO:0005622 intracellular; GO:0005623 cell; GO:0005634 nucleus; GO:0005694 chromosome; GO:0005737 cytoplasm; GO:0009295 nucleoid; GO:0009507 chloroplast; GO:0009508 plastid chromosome; GO:0009532 plastid stroma; GO:0009536 plastid; GO:0030880 RNA polymerase …	GO:0003676 nucleic acid binding; GO:0003677 DNA binding; GO:0003697 single-stranded DNA binding; GO:0003723 RNA binding; GO:0003727 single-stranded RNA binding; GO:0005488 binding; GO:0097159 organic cyclic compound binding; GO:1901363 heterocyclic compound binding;
Capana02g001496	RPB2_SOLLC DNA-directed RNA polymerase II subunit RPB2 OS=Solanum lycopersicum GN=RPB2 PE=2 SV=1	1.88	Up	0.0116812	RPB2	134.27	5.7	11	5	5	31100	0	23646	28831	18020	21249	52802	54209	47312	26451	22545	22478	21029	0	0	26462	24871	29085	33516	33587	42585	0	0	0	nucleus		GO:0000428 DNA-directed RNA polymerase complex; GO:0005622 intracellular; GO:0005623 cell; GO:0005634 nucleus; GO:0005654 nucleoplasm; GO:0005665 DNA-directed RNA polymerase II, core complex; GO:0016591 DNA-directed RNA polymerase II, holoenzyme; GO:0030880 RNA polymerase complex; GO:0031974 membrane-enclosed lumen; GO:0031981 nuclear lumen; GO:0032991 macromolecular complex; GO:0043226 organelle…		K03010	RPB2, POLR2B; DNA-directed RNA polymerase II subunit RPB2 [EC:2.7.7.6]	cann03020 RNA polymerase	PF04561; PF04565; PF04566; PF04567; PF00562; PF04560	RNA polymerase Rpb2, domain 2; RNA polymerase Rpb2, domain 3; RNA polymerase Rpb2, domain 4; RNA polymerase Rpb2, domain 5; RNA polymerase Rpb2, domain 6; RNA polymerase Rpb2, domain 7
Capana02g001527	RPB7_SOYBN DNA-directed RNA polymerase II subunit RPB7 OS=Glycine max PE=2 SV=1	0.466	Down	0.046202	---	20.286	24.4	34	3	3	322810	225330	199480	201630	230600	233600	68666	145120	134320	155350	73334	206940	146020	124590	120460	252840	0	166700	0	107930	119300	77835	234360	152370	cytoplasm		GO:0000418 DNA-directed RNA polymerase IV complex; GO:0000419 DNA-directed RNA polymerase V complex; GO:0000428 DNA-directed RNA polymerase complex; GO:0005622 intracellular; GO:0005623 cell; GO:0005634 nucleus; GO:0005654 nucleoplasm; GO:0030880 RNA polymerase complex; GO:0031974 membrane-enclosed lumen; GO:0031981 nuclear lumen; GO:0032991 macromolecular complex; GO:0043226 organelle; GO:004322…	GO:0003676 nucleic acid binding; GO:0003677 DNA binding; GO:0003697 single-stranded DNA binding; GO:0003723 RNA binding; GO:0003727 single-stranded RNA binding; GO:0005488 binding; GO:0097159 organic cyclic compound binding; GO:1901363 heterocyclic compound binding;	K16253	NRPD7, NRPE7; DNA-directed RNA polymerase IV and V subunit 7		PF03876	SHS2 domain found in N terminus of Rpb7p/Rpc25p/MJ0397
Capana02g001557	MCM31_MAIZE DNA replication licensing factor MCM3 homolog 1 OS=Zea mays GN=ROA1 PE=2 SV=2	0.41	Down	0.006319	ROA1	88.021	17.1	66	8	8	104130	92373	77600	107010	81659	76677	40883	34086	0	102600	94826	109840	29621	36856	42014	90070	102740	81280	97837	114910	104550	36914	54307	43720	nucleus	GO:0006139 nucleobase-containing compound metabolic process; GO:0006259 DNA metabolic process; GO:0006260 DNA replication; GO:0006261 DNA-dependent DNA replication; GO:0006268 DNA unwinding involved in DNA replication; GO:0006725 cellular aromatic compound metabolic process; GO:0006807 nitrogen compound metabolic process; GO:0006996 organelle organization; GO:0008152 metabolic process; GO:0009058…	GO:0000347 THO complex; GO:0005622 intracellular; GO:0005623 cell; GO:0005634 nucleus; GO:0032991 macromolecular complex; GO:0043226 organelle; GO:0043227 membrane-bounded organelle; GO:0043229 intracellular organelle; GO:0043231 intracellular membrane-bounded organelle; GO:0044422 organelle part; GO:0044424 intracellular part; GO:0044428 nuclear part; GO:0044446 intracellular organelle part; GO:…		K02541	MCM3; DNA replication licensing factor MCM3 [EC:3.6.4.12]	cann03030 DNA replication	PF00493	MCM2/3/5 family
Capana02g001572	Putative S-adenosyl-L-methionine-dependent methyltransferase-like	0.52	Down	0.0069821	---	41.34	22.1	41	5	5	111610	106600	76690	120410	115770	90500	46728	52457	54006	52736	40485	54324	84219	70880	61309	97434	97155	69847	53643	48057	39597	113780	110430	148820	chloroplast
Capana02g001575	Putative signaling mucin HKR1-like	0.587	Down	8.233e-05	---	83.781	35.1	194	14	14	801370	746580	753030	672060	634520	603760	433450	446900	471220	703540	737100	722360	608720	621300	612590	630530	613410	601780	624730	616230	599600	650260	635380	674240	nucleus
Capana02g001697	GDL15_ARATH GDSL esterase/lipase At1g29670 OS=Arabidopsis thaliana GN=At1g29670 PE=2 SV=1	0.458	Down	0.0032244	At1g29670	36.801	25.2	28	5	5	69206	65658	55086	88812	118180	99196	29023	29040	0	141500	107860	113050	0	0	0	0	0	0	0	22104	0	55082	0	84329	cytoplasm
Capana02g001796	DSEL_ARATH Phospholipase A1-IIgamma OS=Arabidopsis thaliana GN=DSEL PE=1 SV=1	0.409	Down	1.468e-06	DSEL	45.09	46.1	141	11	11	312380	331830	316770	306100	323510	304640	132970	132740	127000	229920	253350	216370	230910	259910	246810	179630	199060	179350	121120	108220	119970	298930	304770	308470	cytoplasm	GO:0006629 lipid metabolic process; GO:0006638 neutral lipid metabolic process; GO:0006639 acylglycerol metabolic process; GO:0008152 metabolic process; GO:0009056 catabolic process; GO:0009987 cellular process; GO:0010029 regulation of seed germination; GO:0010187 negative regulation of seed germination; GO:0010876 lipid localization; GO:0016042 lipid catabolic process; GO:0019915 lipid storage;…	GO:0005622 intracellular; GO:0005623 cell; GO:0005737 cytoplasm; GO:0044424 intracellular part; GO:0044464 cell part;	GO:0003824 catalytic activity; GO:0004620 phospholipase activity; GO:0008970 phosphatidylcholine 1-acylhydrolase activity; GO:0016298 lipase activity; GO:0016787 hydrolase activity; GO:0016788 hydrolase activity, acting on ester bonds; GO:0047372 acylglycerol lipase activity; GO:0052689 carboxylic ester hydrolase activity;
Capana02g001838	GDL85_ARATH GDSL esterase/lipase At5g45950 OS=Arabidopsis thaliana GN=At5g45950 PE=2 SV=1	0.487	Down	1.89119e-05	At5g45950	40.567	15.4	53	4	4	80369	74424	77745	93407	92173	86979	36304	38872	38039	63419	59496	61185	60858	63699	57104	82159	77528	76367	58956	56324	56844	160420	168550	170520	vacuolar membrane
Capana02g001891	PHS1_DICDI Glycogen phosphorylase 1 OS=Dictyostelium discoideum GN=glpV PE=1 SV=3	1.534	Up	0.00104428	glpV	113.55	15.9	80	9	9	228890	199240	196100	153730	144880	131120	322850	322930	311620	174560	162620	148130	146120	135860	141910	253040	246870	253190	274150	251830	319900	0	43170	36069	chloroplast	GO:0000272 polysaccharide catabolic process; GO:0005975 carbohydrate metabolic process; GO:0005976 polysaccharide metabolic process; GO:0005977 glycogen metabolic process; GO:0005980 glycogen catabolic process; GO:0006073 cellular glucan metabolic process; GO:0006091 generation of precursor metabolites and energy; GO:0006112 energy reserve metabolic process; GO:0008152 metabolic process; GO:00090…	GO:0005622 intracellular; GO:0005623 cell; GO:0005737 cytoplasm; GO:0044424 intracellular part; GO:0044464 cell part;	GO:0003824 catalytic activity; GO:0004645 phosphorylase activity; GO:0005488 binding; GO:0008144 drug binding; GO:0008184 glycogen phosphorylase activity; GO:0016740 transferase activity; GO:0016757 transferase activity, transferring glycosyl groups; GO:0016758 transferase activity, transferring hexosyl groups; GO:0019842 vitamin binding; GO:0030170 pyridoxal phosphate binding; GO:0036094 small m…	K00688	PYG, glgP; glycogen phosphorylase [EC:2.4.1.1]	cann00500 Starch and sucrose metabolism; cann01100 Metabolic pathways; cann01110 Biosynthesis of secondary metabolites
Capana02g001970	MOR1_ARATH Protein MOR1 OS=Arabidopsis thaliana GN=MOR1 PE=1 SV=1	0.636	Down	0.0080038	MOR1	218.08	3.7	22	4	3	75946	59541	60923	74178	52759	61906	38377	45395	41115	45769	44185	49916	53795	54400	57377	60004	55280	55005	54875	52927	54569	33438	41318	0	nucleus				K16803	CKAP5, XMAP215; cytoskeleton-associated protein 5
Capana02g002004	SCAM1_ORYSJ Secretory carrier-associated membrane protein 1 OS=Oryza sativa subsp. japonica GN=SCAMP1 PE=2 SV=1	0.64	Down	0.021483	SCAMP1	34.881	23.8	52	4	4	75242	75787	60272	66545	66134	63999	38660	53766	42793	69678	49247	59834	72012	92844	86660	83164	76451	81218	60241	47670	59262	81516	102600	101320	plasma membrane	GO:0006810 transport; GO:0006897 endocytosis; GO:0006898 receptor-mediated endocytosis; GO:0016192 vesicle-mediated transport; GO:0051179 localization; GO:0051234 establishment of localization; GO:0098657 import into cell;	GO:0005622 intracellular; GO:0005623 cell; GO:0005737 cytoplasm; GO:0005768 endosome; GO:0005769 early endosome; GO:0005886 plasma membrane; GO:0012505 endomembrane system; GO:0016020 membrane; GO:0031410 cytoplasmic vesicle; GO:0031982 vesicle; GO:0043226 organelle; GO:0043227 membrane-bounded organelle; GO:0043229 intracellular organelle; GO:0044424 intracellular part; GO:0044444 cytoplasmic pa…		K19995	SCAMP; secretory carrier-associated membrane protein
Capana02g002069	MFT_ARATH Protein MOTHER of FT and TF 1 OS=Arabidopsis thaliana GN=MFT PE=1 SV=1	1.587	Up	0.020399	MFT	20.022	54.4	55	5	5	79565	61192	90004	30312	64078	104150	135960	113740	116600	181920	129420	163800	95040	104430	102510	181040	157420	186410	234940	210180	196210	225830	391500	335580	cytoplasm							PF01161	Phosphatidylethanolamine-binding protein
Capana02g002102	WRBA_DESMR Flavoprotein wrbA OS=Desulfovibrio magneticus (strain ATCC 700980 / DSM 13731 / RS-1) GN=wrbA PE=3 SV=1	0.644	Down	0.0030371	wrbA	21.674	45.8	44	6	3	152070	143500	135650	248280	140050	144120	91223	102950	83514	169910	176510	167390	106320	138940	109370	162950	150430	105050	134720	129870	123200	310890	353070	404850	cytoplasm				K03809	wrbA; NAD(P)H dehydrogenase (quinone) [EC:1.6.5.2]	cann00130 Ubiquinone and other terpenoid-quinone biosynthesis; cann01100 Metabolic pathways; cann01110 Biosynthesis of secondary metabolites	PF03358	NADPH-dependent FMN reductase
Capana02g002133	"PSBQ2_ARATH Oxygen-evolving enhancer protein 3-2, chloroplastic OS=Arabidopsis thaliana GN=PSBQ2 PE=1 SV=2"	1.518	Up	0.0063608	PSBQ2	24.458	35.7	113	6	6	6641600	7586200	8473700	8962100	8961900	8725400	11357000	12310000	10789000	13759000	13792000	18207000	8928300	9348500	8456800	9478800	7441400	10356000	12872000	13360000	12372000	17273000	15907000	15162000	chloroplast		GO:0005576 extracellular region; GO:0005622 intracellular; GO:0005623 cell; GO:0005737 cytoplasm; GO:0009507 chloroplast; GO:0009532 plastid stroma; GO:0009534 chloroplast thylakoid; GO:0009535 chloroplast thylakoid membrane; GO:0009536 plastid; GO:0009570 chloroplast stroma; GO:0009579 thylakoid; GO:0016020 membrane; GO:0031976 plastid thylakoid; GO:0031977 thylakoid lumen; GO:0031984 organelle …		K08901	psbQ; photosystem II oxygen-evolving enhancer protein 3	cann00195 Photosynthesis
Capana02g002192	PER42_ARATH Peroxidase 42 OS=Arabidopsis thaliana GN=PER42 PE=1 SV=2	0.463	Down	0.00127787	PER42	37.185	20.8	62	5	5	110150	92353	111130	97930	95131	93396	51480	52104	41484	57144	59760	69355	130700	114660	115360	90450	80195	85779	80849	79866	73424	70105	79340	91436	chloroplast	GO:0008152 metabolic process; GO:0009636 response to toxic substance; GO:0009664 plant-type cell wall organization; GO:0009987 cellular process; GO:0016043 cellular component organization; GO:0042221 response to chemical; GO:0045229 external encapsulating structure organization; GO:0050896 response to stimulus; GO:0051716 cellular response to stimulus; GO:0055114 oxidation-reduction process; GO:0…	GO:0005618 cell wall; GO:0005623 cell; GO:0005911 cell-cell junction; GO:0009505 plant-type cell wall; GO:0009506 plasmodesma; GO:0030054 cell junction; GO:0030312 external encapsulating structure; GO:0044464 cell part; GO:0055044 symplast; GO:0071944 cell periphery;	GO:0003824 catalytic activity; GO:0004601 peroxidase activity; GO:0016209 antioxidant activity; GO:0016491 oxidoreductase activity; GO:0016684 oxidoreductase activity, acting on peroxide as acceptor;	K00430	E1.11.1.7; peroxidase [EC:1.11.1.7]	cann00940 Phenylpropanoid biosynthesis; cann01100 Metabolic pathways; cann01110 Biosynthesis of secondary metabolites	PF00141	Peroxidase
Capana02g002210	ASOL_BRANA L-ascorbate oxidase homolog OS=Brassica napus GN=Bp10 PE=2 SV=1	0.632	Down	0.00117533	Bp10	62.058	26.7	88	9	9	373530	335960	311110	351050	346890	343050	221920	211740	211150	279620	282950	263810	287740	281160	280310	264930	258650	263190	252070	252450	219470	262230	267560	282700	cytoplasm							PF07732; PF00394; PF07731	Multicopper oxidase; Multicopper oxidase; Multicopper oxidase
Capana02g002252	Chaperonin-like RBCX protein	1.544	Up	0.040657	---	23.85	22.4	31	3	3	120530	98612	0	0	64582	114300	184830	144160	178620	118450	151200	138590	121580	0	129290	167380	131940	145030	190620	135140	163390	0	181790	212000	nucleus	GO:0001101 response to acid chemical; GO:0006457 protein folding; GO:0006950 response to stress; GO:0006970 response to osmotic stress; GO:0009266 response to temperature stimulus; GO:0009409 response to cold; GO:0009414 response to water deprivation; GO:0009415 response to water; GO:0009628 response to abiotic stimulus; GO:0009651 response to salt stress; GO:0009987 cellular process; GO:0010035 …	GO:0005622 intracellular; GO:0005623 cell; GO:0005737 cytoplasm; GO:0009507 chloroplast; GO:0009534 chloroplast thylakoid; GO:0009536 plastid; GO:0009579 thylakoid; GO:0031976 plastid thylakoid; GO:0031984 organelle subcompartment; GO:0043226 organelle; GO:0043227 membrane-bounded organelle; GO:0043229 intracellular organelle; GO:0043231 intracellular membrane-bounded organelle; GO:0044422 organe…	GO:0005488 binding; GO:0005515 protein binding; GO:0044183 protein binding involved in protein folding;
Capana02g002261	"LIPC_SOLTU Light-induced protein, chloroplastic OS=Solanum tuberosum PE=1 SV=2"	1.651	Up	0.000182131	---	35.26	25.5	59	5	5	375690	372600	414120	341120	350990	398160	661740	628860	629400	636480	672650	639830	609070	593480	582620	616080	608340	645230	626870	661330	693490	965300	965850	1323300	cytoplasm,nucleus	GO:0001101 response to acid chemical; GO:0006950 response to stress; GO:0009266 response to temperature stimulus; GO:0009314 response to radiation; GO:0009409 response to cold; GO:0009414 response to water deprivation; GO:0009415 response to water; GO:0009416 response to light stimulus; GO:0009628 response to abiotic stimulus; GO:0009642 response to light intensity; GO:0009644 response to high li…	GO:0005622 intracellular; GO:0005623 cell; GO:0005634 nucleus; GO:0005737 cytoplasm; GO:0005739 mitochondrion; GO:0009507 chloroplast; GO:0009526 plastid envelope; GO:0009532 plastid stroma; GO:0009534 chloroplast thylakoid; GO:0009535 chloroplast thylakoid membrane; GO:0009536 plastid; GO:0009570 chloroplast stroma; GO:0009579 thylakoid; GO:0010287 plastoglobule; GO:0010319 stromule; GO:0016020 …
Capana02g002369	DUF4220 domain-containing protein	0.514	Down	0.025499	---	81.359	9.6	18	4	4	56659	47462	32395	26975	19609	24353	25328	25310	19538	14882	0	0	45216	33609	40543	71500	28242	60702	40400	45762	31545	0	0	0	plasma membrane
Capana02g002395	EXOSX_HUMAN Exosome component 10 OS=Homo sapiens GN=EXOSC10 PE=1 SV=2	0.518	Down	0.0097228	EXOSC10	95.922	11.8	18	5	5	89213	71964	68904	80849	56574	52042	0	37526	41848	30855	0	0	50274	47781	40249	80240	79602	67241	54235	54212	0	0	0	0	nucleus	GO:0000460 maturation of 5.8S rRNA; GO:0000956 nuclear-transcribed mRNA catabolic process; GO:0006139 nucleobase-containing compound metabolic process; GO:0006259 DNA metabolic process; GO:0006304 DNA modification; GO:0006305 DNA alkylation; GO:0006306 DNA methylation; GO:0006364 rRNA processing; GO:0006396 RNA processing; GO:0006401 RNA catabolic process; GO:0006402 mRNA catabolic process; GO:00…	GO:0000178 exosome (RNase complex); GO:0000785 chromatin; GO:0005622 intracellular; GO:0005623 cell; GO:0005634 nucleus; GO:0005694 chromosome; GO:0005730 nucleolus; GO:0005737 cytoplasm; GO:0005829 cytosol; GO:0031974 membrane-enclosed lumen; GO:0031981 nuclear lumen; GO:0032991 macromolecular complex; GO:0035327 transcriptionally active chromatin; GO:0043226 organelle; GO:0043227 membrane-bound…	GO:0000175 3'-5'-exoribonuclease activity; GO:0003824 catalytic activity; GO:0004518 nuclease activity; GO:0004527 exonuclease activity; GO:0004532 exoribonuclease activity; GO:0004540 ribonuclease activity; GO:0008408 3'-5' exonuclease activity; GO:0016787 hydrolase activity; GO:0016788 hydrolase activity, acting on ester bonds; GO:0016796 exonuclease activity, active with either ribo- or deoxyr…	K12591	RRP6, EXOSC10; exosome complex exonuclease RRP6 [EC:3.1.13.-]	cann03018 RNA degradation	PF08066; PF01612; PF00570	PMC2NT (NUC016) domain; 3'-5' exonuclease; HRDC domain
Capana02g002731	ABAH1_ARATH Abscisic acid 8'-hydroxylase 1 OS=Arabidopsis thaliana GN=CYP707A1 PE=2 SV=1	1.608	Up	0.0026371	CYP707A1	55.779	4.1	28	2	2	149030	175660	187960	195280	187510	216310	280320	280690	263260	295410	266980	253070	241000	251280	262740	244940	250730	265180	266280	294670	285300	452130	471120	0	chloroplast							PF00067	Cytochrome P450
Capana02g002881	AAKB1_PIG 5'-AMP-activated protein kinase subunit beta-1 (Fragment) OS=Sus scrofa GN=PRKAB1 PE=1 SV=1	1.592	Up	0.0137568	PRKAB1	33.423	20.1	29	4	3	29423	32879	26010	22747	23741	29325	39135	51314	50169	51836	46693	48173	24062	24263	21583	28170	24904	25289	35761	34036	46196	15464	17172	20006	nucleus	GO:0000271 polysaccharide biosynthetic process; GO:0005975 carbohydrate metabolic process; GO:0005976 polysaccharide metabolic process; GO:0005982 starch metabolic process; GO:0006073 cellular glucan metabolic process; GO:0006109 regulation of carbohydrate metabolic process; GO:0008152 metabolic process; GO:0009058 biosynthetic process; GO:0009059 macromolecule biosynthetic process; GO:0009250 gl…	GO:0005622 intracellular; GO:0005623 cell; GO:0005737 cytoplasm; GO:0009507 chloroplast; GO:0009532 plastid stroma; GO:0009536 plastid; GO:0009569 chloroplast starch grain; GO:0009570 chloroplast stroma; GO:0043036 starch grain; GO:0043226 organelle; GO:0043227 membrane-bounded organelle; GO:0043229 intracellular organelle; GO:0043231 intracellular membrane-bounded organelle; GO:0044422 organelle…	GO:0001871 pattern binding; GO:0005488 binding; GO:0030246 carbohydrate binding; GO:0030247 polysaccharide binding; GO:2001070 starch binding;
Capana02g003138	ASOL_TOBAC L-ascorbate oxidase homolog OS=Nicotiana tabacum PE=2 SV=1	0.593	Down	0.034716	---	60.037	23.9	46	9	5	105130	105740	105680	106540	126850	95485	67236	69788	50514	81405	72145	51515	99084	105970	97671	72867	68876	89413	40462	52551	33888	142060	135940	150120	vacuolar membrane							PF07732; PF00394; PF07731	Multicopper oxidase; Multicopper oxidase; Multicopper oxidase
Capana02g003153	NUPL1_RAT Nucleoporin p58/p45 OS=Rattus norvegicus GN=Nupl1 PE=1 SV=1	0.63	Down	0.0057394	Nupl1	59.865	12.2	45	5	5	78121	70935	88111	80035	78841	78810	53730	44285	51322	85386	82092	80087	65958	59000	74469	71065	73009	63977	50575	56356	62749	128500	115730	121310	nucleus	GO:0006606 protein import into nucleus; GO:0006810 transport; GO:0006886 intracellular protein transport; GO:0006913 nucleocytoplasmic transport; GO:0008104 protein localization; GO:0015031 protein transport; GO:0015833 peptide transport; GO:0017038 protein import; GO:0033036 macromolecule localization; GO:0033365 protein localization to organelle; GO:0034504 protein localization to nucleus; GO:0…	GO:0005622 intracellular; GO:0005623 cell; GO:0005634 nucleus; GO:0005635 nuclear envelope; GO:0005643 nuclear pore; GO:0012505 endomembrane system; GO:0031967 organelle envelope; GO:0031975 envelope; GO:0032991 macromolecular complex; GO:0043226 organelle; GO:0043227 membrane-bounded organelle; GO:0043229 intracellular organelle; GO:0043231 intracellular membrane-bounded organelle; GO:0044422 or…	GO:0005048 signal sequence binding; GO:0005488 binding; GO:0008139 nuclear localization sequence binding; GO:0033218 amide binding; GO:0042277 peptide binding;	K14307	NUPL1, NUP49; nucleoporin p58/p45	cann03013 RNA transport
Capana02g003266	FERON_ARATH Receptor-like protein kinase FERONIA OS=Arabidopsis thaliana GN=FER PE=1 SV=1	0.663	Down	0.00029905	FER	161.95	7.8	43	5	5	85985	87906	89974	65809	72256	61230	60947	54687	59289	33137	30779	33383	99000	91437	110210	83552	66311	75688	46473	60481	44847	0	0	0	plasma membrane	GO:0000003 reproduction; GO:0001558 regulation of cell growth; GO:0006464 cellular protein modification process; GO:0006468 protein phosphorylation; GO:0006793 phosphorus metabolic process; GO:0006796 phosphate-containing compound metabolic process; GO:0006807 nitrogen compound metabolic process; GO:0006950 response to stress; GO:0006952 defense response; GO:0007275 multicellular organism develop…	GO:0005618 cell wall; GO:0005623 cell; GO:0005886 plasma membrane; GO:0005911 cell-cell junction; GO:0009506 plasmodesma; GO:0016020 membrane; GO:0030054 cell junction; GO:0030312 external encapsulating structure; GO:0043680 filiform apparatus; GO:0044426 cell wall part; GO:0044462 external encapsulating structure part; GO:0044464 cell part; GO:0055044 symplast; GO:0071944 cell periphery;	GO:0003824 catalytic activity; GO:0004672 protein kinase activity; GO:0016301 kinase activity; GO:0016740 transferase activity; GO:0016772 transferase activity, transferring phosphorus-containing groups; GO:0016773 phosphotransferase activity, alcohol group as acceptor;				PF12819; PF07714	Carbohydrate-binding protein of the ER; Protein tyrosine kinase
Capana02g003380	AB19B_ARATH ABC transporter B family member 19 OS=Arabidopsis thaliana GN=ABCB19 PE=1 SV=1	0.539	Down	0.0020047	ABCB19	116.26	8.6	58	5	5	112190	109680	97783	126340	117250	121940	65910	51031	55298	105810	103560	98928	81847	91114	100030	75696	76066	77533	66925	76825	65516	0	64603	64361	plasma membrane	GO:0000003 reproduction; GO:0003006 developmental process involved in reproduction; GO:0006810 transport; GO:0007275 multicellular organism development; GO:0008361 regulation of cell size; GO:0009314 response to radiation; GO:0009411 response to UV; GO:0009416 response to light stimulus; GO:0009605 response to external stimulus; GO:0009606 tropism; GO:0009628 response to abiotic stimulus; GO:0009…	GO:0005623 cell; GO:0005886 plasma membrane; GO:0016020 membrane; GO:0044464 cell part; GO:0071944 cell periphery;	GO:0005215 transporter activity; GO:0010329 auxin efflux transmembrane transporter activity; GO:0015562 efflux transmembrane transporter activity; GO:0022857 transmembrane transporter activity; GO:0080161 auxin transmembrane transporter activity;	K05658	ABCB1, CD243; ATP-binding cassette, subfamily B (MDR/TAP), member 1 [EC:3.6.3.44]	cann02010 ABC transporters	PF00005	ABC transporter
Capana02g003383	PGIP_PYRCO Polygalacturonase inhibitor OS=Pyrus communis GN=PGIP PE=1 SV=1	0.591	Down	0.00412	PGIP	36.714	13.8	24	3	3	64613	72193	59392	84629	65311	84479	43414	34142	38344	72745	61446	79908	0	0	0	0	0	0	0	0	0	0	0	0	chloroplast	GO:0043086 negative regulation of catalytic activity; GO:0044092 negative regulation of molecular function; GO:0050790 regulation of catalytic activity; GO:0065007 biological regulation; GO:0065009 regulation of molecular function;	GO:0005618 cell wall; GO:0005622 intracellular; GO:0005623 cell; GO:0005737 cytoplasm; GO:0005794 Golgi apparatus; GO:0005911 cell-cell junction; GO:0009505 plant-type cell wall; GO:0009506 plasmodesma; GO:0012505 endomembrane system; GO:0016020 membrane; GO:0030054 cell junction; GO:0030312 external encapsulating structure; GO:0043226 organelle; GO:0043227 membrane-bounded organelle; GO:0043229 …	GO:0004857 enzyme inhibitor activity; GO:0030234 enzyme regulator activity; GO:0090353 polygalacturonase inhibitor activity; GO:0098772 molecular function regulator;
Capana02g003456	"FTRC_ARATH Ferredoxin-thioredoxin reductase catalytic chain, chloroplastic OS=Arabidopsis thaliana GN=FTRC PE=2 SV=1"	1.525	Up	0.040399	FTRC	47.961	8.6	25	3	3	0	401850	345560	410860	424270	412920	595760	544380	0	506460	517850	522560	399110	383170	404790	365930	442210	432130	517100	522410	0	572240	522160	534610	chloroplast				K18756	BICC1, BICC; protein bicaudal C		PF02943; PF00536	Ferredoxin thioredoxin reductase catalytic beta chain; SAM domain (Sterile alpha motif)
Capana02g003462	HMA domain-containing protein	1.957	Up	0.016064	---	20.56	27.3	42	4	4	195130	301490	340370	374420	517040	428010	567640	501420	568600	863090	783660	1141300	306240	366270	255750	428180	278180	327790	360140	489760	394940	406160	420390	346870	chloroplast
Capana02g003514	DB10_NICSY ATP-dependent RNA helicase-like protein DB10 OS=Nicotiana sylvestris PE=2 SV=1	0.537	Down	0.0020983	---	82.289	18.7	42	9	7	88385	88631	106300	86344	77864	80425	48210	46654	57250	78407	73693	52384	65123	67866	70803	64806	64781	59490	90961	68465	43543	62581	71678	89069	nucleus	GO:0006139 nucleobase-containing compound metabolic process; GO:0006464 cellular protein modification process; GO:0006468 protein phosphorylation; GO:0006725 cellular aromatic compound metabolic process; GO:0006793 phosphorus metabolic process; GO:0006796 phosphate-containing compound metabolic process; GO:0006807 nitrogen compound metabolic process; GO:0006950 response to stress; GO:0006970 resp…	GO:0005622 intracellular; GO:0005623 cell; GO:0005634 nucleus; GO:0005730 nucleolus; GO:0005737 cytoplasm; GO:0005829 cytosol; GO:0031974 membrane-enclosed lumen; GO:0031981 nuclear lumen; GO:0043226 organelle; GO:0043227 membrane-bounded organelle; GO:0043228 non-membrane-bounded organelle; GO:0043229 intracellular organelle; GO:0043231 intracellular membrane-bounded organelle; GO:0043232 intrac…	GO:0003724 RNA helicase activity; GO:0003824 catalytic activity; GO:0004004 ATP-dependent RNA helicase activity; GO:0004386 helicase activity; GO:0004672 protein kinase activity; GO:0004674 protein serine/threonine kinase activity; GO:0008026 ATP-dependent helicase activity; GO:0008186 RNA-dependent ATPase activity; GO:0016301 kinase activity; GO:0016462 pyrophosphatase activity; GO:0016740 trans…	K12823	DDX5, DBP2; ATP-dependent RNA helicase DDX5/DBP2 [EC:3.6.4.13]	cann03040 Spliceosome	PF00397; PF00270	WW domain; DEAD/DEAH box helicase
Capana02g003546	titin isoform X2	1.901	Up	0.00090472	---	454.06	20.6	307	47	47	598680	516910	474240	432970	401770	381400	958690	1052800	1009100	647760	622670	623240	453280	419090	446130	480420	469910	403870	858150	804180	810580	166330	209820	206690	nucleus
Capana02g003634	BCP_PEA Blue copper protein OS=Pisum sativum PE=2 SV=1	0.601	Down	0.019915	---	17.939	30.6	34	3	3	40528	51695	51372	50389	61814	41553	30325	0	27201	54987	68947	69082	40125	51552	49127	74933	74108	47348	84473	52879	59885	155860	156480	159440	extracellular							PF02298	Plastocyanin-like domain
Capana02g003638	VPS52_MOUSE Vacuolar protein sorting-associated protein 52 homolog OS=Mus musculus GN=Vps52 PE=2 SV=1	2.32	Up	0.0024612	Vps52	80.745	8.1	17	4	4	197500	176450	142800	122850	29446	127150	338440	425350	434680	23694	144060	41394	127000	123040	121930	206280	35250	146780	324980	166180	254220	0	0	0	cytoplasm	GO:0000003 reproduction; GO:0000902 cell morphogenesis; GO:0000904 cell morphogenesis involved in differentiation; GO:0003006 developmental process involved in reproduction; GO:0006810 transport; GO:0006892 post-Golgi vesicle-mediated transport; GO:0006896 Golgi to vacuole transport; GO:0007034 vacuolar transport; GO:0009653 anatomical structure morphogenesis; GO:0009826 unidimensional cell growt…	GO:0000139 Golgi membrane; GO:0000938 GARP complex; GO:0005622 intracellular; GO:0005623 cell; GO:0005737 cytoplasm; GO:0005768 endosome; GO:0005794 Golgi apparatus; GO:0005802 trans-Golgi network; GO:0010008 endosome membrane; GO:0012505 endomembrane system; GO:0016020 membrane; GO:0031090 organelle membrane; GO:0031410 cytoplasmic vesicle; GO:0031982 vesicle; GO:0031984 organelle subcompartment…	GO:0000149 SNARE binding; GO:0005488 binding; GO:0005515 protein binding; GO:0017016 Ras GTPase binding; GO:0017137 Rab GTPase binding; GO:0019899 enzyme binding; GO:0019905 syntaxin binding; GO:0031267 small GTPase binding; GO:0051020 GTPase binding;	K20298	VPS52; vacuolar protein sorting-associated protein 52
Capana02g003669	Putative pollen allergen Che a 1-like	0.539	Down	8.0571e-05	---	18.345	36.3	60	4	4	440250	404010	389180	417310	414870	369080	221540	218770	225320	219150	209840	215440	330850	344750	341190	322890	318080	318260	228930	188140	204020	309960	310840	336520	chloroplast
Capana03g000027	Y1491_ARATH DUF246 domain-containing protein At1g04910 OS=Arabidopsis thaliana GN=At1g04910 PE=1 SV=1	0.267	Down	0.00161518	At1g04910	45.368	18.9	31	5	5	117850	107360	99899	77388	65094	81954	24972	0	32988	38059	37273	34200	40152	47906	36637	0	0	33629	27896	36908	0	38499	48275	33841	vacuolar membrane	GO:0000271 polysaccharide biosynthetic process; GO:0005975 carbohydrate metabolic process; GO:0005976 polysaccharide metabolic process; GO:0008152 metabolic process; GO:0009058 biosynthetic process; GO:0009059 macromolecule biosynthetic process; GO:0009664 plant-type cell wall organization; GO:0009832 plant-type cell wall biogenesis; GO:0009987 cellular process; GO:0010383 cell wall polysaccharid…	GO:0005618 cell wall; GO:0005622 intracellular; GO:0005623 cell; GO:0005737 cytoplasm; GO:0005768 endosome; GO:0005794 Golgi apparatus; GO:0005802 trans-Golgi network; GO:0009505 plant-type cell wall; GO:0012505 endomembrane system; GO:0030312 external encapsulating structure; GO:0031410 cytoplasmic vesicle; GO:0031982 vesicle; GO:0031984 organelle subcompartment; GO:0043226 organelle; GO:0043227…	GO:0000030 mannosyltransferase activity; GO:0003824 catalytic activity; GO:0016740 transferase activity; GO:0016757 transferase activity, transferring glycosyl groups; GO:0016758 transferase activity, transferring hexosyl groups; GO:0019187 beta-1,4-mannosyltransferase activity; GO:0051753 mannan synthase activity;
Capana03g000103	"LOX31_SOLTU Linoleate 13S-lipoxygenase 3-1, chloroplastic OS=Solanum tuberosum GN=LOX3.1 PE=1 SV=1"	0.41	Down	0.003743	LOX3.1	102.69	14.3	33	8	8	76705	66633	58091	19364	28747	23055	26468	0	28583	67072	76048	57540	33048	33291	34957	25282	27128	18707	15895	0	15904	0	20938	22918	cytoplasm	GO:0000003 reproduction; GO:0000302 response to reactive oxygen species; GO:0001101 response to acid chemical; GO:0003006 developmental process involved in reproduction; GO:0006082 organic acid metabolic process; GO:0006629 lipid metabolic process; GO:0006631 fatty acid metabolic process; GO:0006690 icosanoid metabolic process; GO:0006950 response to stress; GO:0006979 response to oxidative stres…	GO:0005622 intracellular; GO:0005623 cell; GO:0005737 cytoplasm; GO:0009507 chloroplast; GO:0009532 plastid stroma; GO:0009534 chloroplast thylakoid; GO:0009536 plastid; GO:0009570 chloroplast stroma; GO:0009579 thylakoid; GO:0031976 plastid thylakoid; GO:0031984 organelle subcompartment; GO:0043226 organelle; GO:0043227 membrane-bounded organelle; GO:0043229 intracellular organelle; GO:0043231 i…	GO:0003824 catalytic activity; GO:0016165 linoleate 13S-lipoxygenase activity; GO:0016491 oxidoreductase activity; GO:0016701 oxidoreductase activity, acting on single donors with incorporation of molecular oxygen; GO:0016702 oxidoreductase activity, acting on single donors with incorporation of molecular oxygen, incorporation of two atoms of oxygen; GO:0051213 dioxygenase activity;	K00454	LOX2S; lipoxygenase [EC:1.13.11.12]	cann00591 Linoleic acid metabolism; cann00592 alpha-Linolenic acid metabolism; cann01100 Metabolic pathways; cann01110 Biosynthesis of secondary metabolites	PF01477; PF00305	PLAT/LH2 domain; Lipoxygenase
Capana03g000118	TIAR_HUMAN Nucleolysin TIAR OS=Homo sapiens GN=TIAL1 PE=1 SV=1	0.642	Down	0.00022337	TIAL1	45.64	26.1	56	7	5	117130	115720	107680	133040	139840	129520	69597	74222	74884	91899	94575	97196	62989	96038	107600	111440	100330	103930	90408	95241	92184	140060	164100	154490	peroxisome	GO:0006355 regulation of transcription, DNA-templated; GO:0006357 regulation of transcription from RNA polymerase II promoter; GO:0006915 apoptotic process; GO:0006950 response to stress; GO:0006952 defense response; GO:0007154 cell communication; GO:0007165 signal transduction; GO:0007166 cell surface receptor signaling pathway; GO:0007167 enzyme linked receptor protein signaling pathway; GO:000…	GO:0000323 lytic vacuole; GO:0005622 intracellular; GO:0005623 cell; GO:0005634 nucleus; GO:0005654 nucleoplasm; GO:0005737 cytoplasm; GO:0005764 lysosome; GO:0005773 vacuole; GO:0010494 cytoplasmic stress granule; GO:0031974 membrane-enclosed lumen; GO:0031981 nuclear lumen; GO:0032991 macromolecular complex; GO:0035770 ribonucleoprotein granule; GO:0036464 cytoplasmic ribonucleoprotein granule;…	GO:0003676 nucleic acid binding; GO:0003723 RNA binding; GO:0003729 mRNA binding; GO:0005488 binding; GO:0097159 organic cyclic compound binding; GO:1901363 heterocyclic compound binding;	K13201	TIA1, TIAL1; nucleolysin TIA-1/TIAR		PF00076	RNA recognition motif. (a.k.a. RRM, RBD, or RNP domain)
Capana03g000180	BGAL_SOLLC Beta-galactosidase OS=Solanum lycopersicum PE=1 SV=1	1.567	Up	0.00052275	---	92.003	55.9	305	25	21	802030	864600	776850	1559300	1482300	1504400	1199100	1321300	1306200	1218400	1225600	1258400	1021600	1024900	999410	938550	945460	952390	821310	836740	792680	1071200	1002500	1076000	chloroplast		GO:0005618 cell wall; GO:0005622 intracellular; GO:0005623 cell; GO:0005737 cytoplasm; GO:0005773 vacuole; GO:0030312 external encapsulating structure; GO:0043226 organelle; GO:0043227 membrane-bounded organelle; GO:0043229 intracellular organelle; GO:0043231 intracellular membrane-bounded organelle; GO:0044424 intracellular part; GO:0044444 cytoplasmic part; GO:0044464 cell part; GO:0071944 cell…	GO:0003824 catalytic activity; GO:0004553 hydrolase activity, hydrolyzing O-glycosyl compounds; GO:0004565 beta-galactosidase activity; GO:0015925 galactosidase activity; GO:0016787 hydrolase activity; GO:0016798 hydrolase activity, acting on glycosyl bonds;				PF01301; PF02140	Glycosyl hydrolases family 35; Galactose binding lectin domain
Capana03g000524	TPR1_ARATH Topless-related protein 1 OS=Arabidopsis thaliana GN=TPR1 PE=1 SV=3	0.586	Down	2.0925e-05	TPR1	124.31	22.5	124	14	10	213760	218360	208030	216100	195860	227470	128570	120640	125840	135150	142930	132800	208320	208730	195230	194570	186830	182000	142360	146210	136530	201720	193040	187990	chloroplast	GO:0000003 reproduction; GO:0001101 response to acid chemical; GO:0003002 regionalization; GO:0003006 developmental process involved in reproduction; GO:0006355 regulation of transcription, DNA-templated; GO:0007154 cell communication; GO:0007165 signal transduction; GO:0007275 multicellular organism development; GO:0007389 pattern specification process; GO:0009653 anatomical structure morphogene…	GO:0005622 intracellular; GO:0005623 cell; GO:0005634 nucleus; GO:0005737 cytoplasm; GO:0005829 cytosol; GO:0043226 organelle; GO:0043227 membrane-bounded organelle; GO:0043229 intracellular organelle; GO:0043231 intracellular membrane-bounded organelle; GO:0044424 intracellular part; GO:0044444 cytoplasmic part; GO:0044464 cell part;	GO:0005488 binding; GO:0005515 protein binding; GO:0042802 identical protein binding; GO:0042803 protein homodimerization activity; GO:0046983 protein dimerization activity;
Capana03g000578	4CL1_TOBAC 4-coumarate--CoA ligase 1 OS=Nicotiana tabacum GN=4CL1 PE=2 SV=1	0.592	Down	0.0024974	4CL1	59.695	9	22	3	2	0	44585	41215	37329	37295	43669	26211	23583	26407	0	0	26116	43489	41770	0	44192	44312	39144	39274	40817	40615	0	60929	62797	chloroplast	GO:0006725 cellular aromatic compound metabolic process; GO:0008152 metabolic process; GO:0009058 biosynthetic process; GO:0009698 phenylpropanoid metabolic process; GO:0009699 phenylpropanoid biosynthetic process; GO:0009987 cellular process; GO:0019438 aromatic compound biosynthetic process; GO:0019748 secondary metabolic process; GO:0044237 cellular metabolic process; GO:0044249 cellular biosy…	GO:0005622 intracellular; GO:0005623 cell; GO:0005737 cytoplasm; GO:0044424 intracellular part; GO:0044464 cell part;	GO:0003824 catalytic activity; GO:0016207 4-coumarate-CoA ligase activity; GO:0016405 CoA-ligase activity; GO:0016874 ligase activity; GO:0016877 ligase activity, forming carbon-sulfur bonds; GO:0016878 acid-thiol ligase activity;	K01904	4CL; 4-coumarate--CoA ligase [EC:6.2.1.12]	cann00130 Ubiquinone and other terpenoid-quinone biosynthesis; cann00940 Phenylpropanoid biosynthesis; cann00999 Biosynthesis of secondary metabolites - unclassified; cann01100 Metabolic pathways; cann01110 Biosynthesis of secondary metabolites	PF13193	Domain of unknown function (DUF4009)
Capana03g000613	RUBR1_DESDA Rubredoxin-1 OS=Desulfovibrio desulfuricans (strain ATCC 27774 / DSM 6949) GN=rd1 PE=1 SV=1	1.837	Up	0.0151429	rd1	17.362	14.4	54	3	3	206820	293410	344930	544580	537090	549330	531250	485860	535330	399610	394120	384910	440630	460940	449340	496580	503920	533340	428600	433900	421560	589990	573120	553690	chloroplast							PF00301	Rubredoxin
Capana03g000654	PQQL_ECOLI Probable zinc protease pqqL OS=Escherichia coli (strain K12) GN=pqqL PE=3 SV=2	1.753	Up	5.9833e-05	pqqL	133.14	30.7	305	25	25	1230600	1142000	1108800	1006200	947400	931860	2027600	2012200	2063500	1223000	1266300	1272500	896240	874390	900980	1580800	1503900	1495200	2085900	2006000	1936000	533750	546790	620700	chloroplast	GO:0000003 reproduction; GO:0003006 developmental process involved in reproduction; GO:0007275 multicellular organism development; GO:0009790 embryo development; GO:0009791 post-embryonic development; GO:0009793 embryo development ending in seed dormancy; GO:0010154 fruit development; GO:0022414 reproductive process; GO:0032501 multicellular organismal process; GO:0032502 developmental process; G…	GO:0005622 intracellular; GO:0005623 cell; GO:0005737 cytoplasm; GO:0005739 mitochondrion; GO:0005829 cytosol; GO:0009507 chloroplast; GO:0009532 plastid stroma; GO:0009536 plastid; GO:0009570 chloroplast stroma; GO:0043226 organelle; GO:0043227 membrane-bounded organelle; GO:0043229 intracellular organelle; GO:0043231 intracellular membrane-bounded organelle; GO:0044422 organelle part; GO:004442…					PF05193	Peptidase M16 inactive domain
Capana03g000730	Y3028_ARATH Uncharacterized acetyltransferase At3g50280 OS=Arabidopsis thaliana GN=At3g50280 PE=1 SV=1	0.656	Down	0.00105596	At3g50280	52.926	25.7	69	7	7	205010	204360	180700	179980	176520	175050	123710	135630	127710	129660	132380	134730	112660	113120	121410	142810	128590	123310	108220	76327	99112	95341	93683	102660	cytoplasm
Capana03g000760	"VAR3_ARATH Zinc finger protein VAR3, chloroplastic OS=Arabidopsis thaliana GN=VAR3 PE=1 SV=2"	0.643	Down	0.0195995	VAR3	49.768	23.6	45	6	6	74503	72101	67350	78772	79818	80036	45467	36856	55266	52892	43185	41818	55302	57783	67494	34354	34928	60884	44531	38595	63489	59713	62136	58403	chloroplast	GO:0006139 nucleobase-containing compound metabolic process; GO:0006725 cellular aromatic compound metabolic process; GO:0006807 nitrogen compound metabolic process; GO:0006996 organelle organization; GO:0008152 metabolic process; GO:0009451 RNA modification; GO:0009657 plastid organization; GO:0009658 chloroplast organization; GO:0009987 cellular process; GO:0016043 cellular component organizati…	GO:0005622 intracellular; GO:0005623 cell; GO:0005737 cytoplasm; GO:0009507 chloroplast; GO:0009532 plastid stroma; GO:0009536 plastid; GO:0009570 chloroplast stroma; GO:0043226 organelle; GO:0043227 membrane-bounded organelle; GO:0043229 intracellular organelle; GO:0043231 intracellular membrane-bounded organelle; GO:0044422 organelle part; GO:0044424 intracellular part; GO:0044434 chloroplast p…					PF00641	Zn-finger in Ran binding protein and others
Capana03g000813	VTI13_ARATH Vesicle transport v-SNARE 13 OS=Arabidopsis thaliana GN=VTI13 PE=2 SV=1	0.627	Down	0.00185921	VTI13	25.109	42.1	119	6	6	343910	339840	293190	323260	326520	319710	192380	218590	201440	305310	290100	307910	255540	300310	268980	268030	291760	262110	237390	258240	230290	226400	287690	293120	Golgi apparatus	GO:0006605 protein targeting; GO:0006623 protein targeting to vacuole; GO:0006810 transport; GO:0006886 intracellular protein transport; GO:0006888 ER to Golgi vesicle-mediated transport; GO:0006892 post-Golgi vesicle-mediated transport; GO:0006896 Golgi to vacuole transport; GO:0006906 vesicle fusion; GO:0006996 organelle organization; GO:0007034 vacuolar transport; GO:0008104 protein localizati…	GO:0005622 intracellular; GO:0005623 cell; GO:0005737 cytoplasm; GO:0005768 endosome; GO:0005770 late endosome; GO:0005783 endoplasmic reticulum; GO:0005789 endoplasmic reticulum membrane; GO:0005794 Golgi apparatus; GO:0005798 Golgi-associated vesicle; GO:0010008 endosome membrane; GO:0012505 endomembrane system; GO:0012506 vesicle membrane; GO:0012507 ER to Golgi transport vesicle membrane; GO:…	GO:0005484 SNAP receptor activity; GO:0005488 binding; GO:0005515 protein binding;	K08493	VTI1; vesicle transport through interaction with t-SNAREs 1	cann04130 SNARE interactions in vesicular transport	PF12352	Snare region anchored in the vesicle membrane C-terminus
Capana03g000846	UGDH_SOYBN UDP-glucose 6-dehydrogenase OS=Glycine max PE=2 SV=1	0.529	Down	0.031359	---	52.845	40	27	11	5	64382	75174	49377	68049	91265	102680	38981	23791	37035	44924	35029	42400	35751	33652	49804	56064	35542	55134	46738	52265	66882	128280	104310	139700	extracellular	GO:0006022 aminoglycan metabolic process; GO:0006023 aminoglycan biosynthetic process; GO:0006024 glycosaminoglycan biosynthetic process; GO:0006807 nitrogen compound metabolic process; GO:0008152 metabolic process; GO:0009058 biosynthetic process; GO:0009059 macromolecule biosynthetic process; GO:0030203 glycosaminoglycan metabolic process; GO:0043170 macromolecule metabolic process; GO:0071704 …	GO:0005622 intracellular; GO:0005623 cell; GO:0005634 nucleus; GO:0005737 cytoplasm; GO:0005829 cytosol; GO:0043226 organelle; GO:0043227 membrane-bounded organelle; GO:0043229 intracellular organelle; GO:0043231 intracellular membrane-bounded organelle; GO:0044424 intracellular part; GO:0044444 cytoplasmic part; GO:0044464 cell part;		K00012	UGDH, ugd; UDPglucose 6-dehydrogenase [EC:1.1.1.22]	cann00040 Pentose and glucuronate interconversions; cann00053 Ascorbate and aldarate metabolism; cann00520 Amino sugar and nucleotide sugar metabolism; cann01100 Metabolic pathways	PF03721; PF00984; PF03720	UDP-glucose/GDP-mannose dehydrogenase family, NAD binding domain; UDP-glucose/GDP-mannose dehydrogenase family, central domain; UDP-glucose/GDP-mannose dehydrogenase family, UDP binding domain
Capana03g000892	F3PH_PETHY Flavonoid 3'-monooxygenase OS=Petunia hybrida GN=CYP75B2 PE=2 SV=1	0.185	Down	0.00082436	CYP75B2	51.93	34.3	59	12	12	475440	263120	395660	705210	483240	507570	77888	67094	65036	231450	170120	173240	17826	22939	27806	0	23767	26238	18783	0	0	49569	65820	55571	chloroplast	GO:0008152 metabolic process; GO:0009058 biosynthetic process; GO:0009719 response to endogenous stimulus; GO:0009725 response to hormone; GO:0009733 response to auxin; GO:0010033 response to organic substance; GO:0019748 secondary metabolic process; GO:0042221 response to chemical; GO:0044550 secondary metabolite biosynthetic process; GO:0050896 response to stimulus; GO:0055114 oxidation-reducti…	GO:0016020 membrane;	GO:0003824 catalytic activity; GO:0004497 monooxygenase activity; GO:0016491 oxidoreductase activity; GO:0016705 oxidoreductase activity, acting on paired donors, with incorporation or reduction of molecular oxygen; GO:0016709 oxidoreductase activity, acting on paired donors, with incorporation or reduction of molecular oxygen, NAD(P)H as one donor, and incorporation of one atom of oxygen;	K05280	E1.14.13.21; flavonoid 3'-monooxygenase [EC:1.14.13.21]	cann00941 Flavonoid biosynthesis; cann00944 Flavone and flavonol biosynthesis; cann01100 Metabolic pathways; cann01110 Biosynthesis of secondary metabolites	PF00067	Cytochrome P450
Capana03g000994	RAC3_ORYSJ Rac-like GTP-binding protein 3 OS=Oryza sativa subsp. japonica GN=RAC3 PE=2 SV=1	0.61	Down	0.0052961	RAC3	21.44	21.8	42	3	3	58444	52611	53054	53189	53785	54016	28412	33751	37973	20709	22986	24190	41454	39176	45776	54653	56642	42868	27094	30788	27078	55434	59094	60358	chloroplast	GO:0001101 response to acid chemical; GO:0007154 cell communication; GO:0007165 signal transduction; GO:0009664 plant-type cell wall organization; GO:0009719 response to endogenous stimulus; GO:0009725 response to hormone; GO:0009737 response to abscisic acid; GO:0009738 abscisic acid-activated signaling pathway; GO:0009755 hormone-mediated signaling pathway; GO:0009787 regulation of abscisic aci…	GO:0005618 cell wall; GO:0005622 intracellular; GO:0005623 cell; GO:0005634 nucleus; GO:0005737 cytoplasm; GO:0005856 cytoskeleton; GO:0005886 plasma membrane; GO:0009505 plant-type cell wall; GO:0009531 secondary cell wall; GO:0016020 membrane; GO:0030312 external encapsulating structure; GO:0043226 organelle; GO:0043227 membrane-bounded organelle; GO:0043228 non-membrane-bounded organelle; GO:0…	GO:0003824 catalytic activity; GO:0003924 GTPase activity; GO:0005488 binding; GO:0005515 protein binding; GO:0016462 pyrophosphatase activity; GO:0016787 hydrolase activity; GO:0016817 hydrolase activity, acting on acid anhydrides; GO:0016818 hydrolase activity, acting on acid anhydrides, in phosphorus-containing anhydrides; GO:0017111 nucleoside-triphosphatase activity; GO:0019899 enzyme bindin…	K04392	RAC1; Ras-related C3 botulinum toxin substrate 1	cann04145 Phagosome; cann04933 AGE-RAGE signaling pathway in diabetic complications	PF00071	Ras family
Capana03g001165	MOS1_ARATH Protein MODIFIER OF SNC1 1 OS=Arabidopsis thaliana GN=MOS1 PE=1 SV=2	0.658	Down	0.0195436	MOS1	167.23	12.3	74	12	12	137570	117810	98216	102800	105350	89079	70552	83712	78221	108610	97568	90486	111930	102070	107380	124110	117280	108630	117970	96312	103890	97654	107510	116590	nucleus
Capana03g001208	RH30_ORYSJ DEAD-box ATP-dependent RNA helicase 30 OS=Oryza sativa subsp. japonica GN=Os01g0911100 PE=2 SV=2	0.652	Down	0.00102026	Os01g0911100	65.052	15.1	38	7	6	110730	109740	101940	126380	124550	116770	65592	75848	68673	56061	57393	47632	101910	92014	91892	89428	80515	80727	63507	58488	60269	98568	105900	112080	cytoplasm	GO:0006139 nucleobase-containing compound metabolic process; GO:0006725 cellular aromatic compound metabolic process; GO:0006807 nitrogen compound metabolic process; GO:0008152 metabolic process; GO:0009987 cellular process; GO:0010501 RNA secondary structure unwinding; GO:0016070 RNA metabolic process; GO:0034641 cellular nitrogen compound metabolic process; GO:0043170 macromolecule metabolic pr…	GO:0005622 intracellular; GO:0005623 cell; GO:0005634 nucleus; GO:0005730 nucleolus; GO:0005737 cytoplasm; GO:0005829 cytosol; GO:0031974 membrane-enclosed lumen; GO:0031981 nuclear lumen; GO:0043226 organelle; GO:0043227 membrane-bounded organelle; GO:0043228 non-membrane-bounded organelle; GO:0043229 intracellular organelle; GO:0043231 intracellular membrane-bounded organelle; GO:0043232 intrac…	GO:0003676 nucleic acid binding; GO:0003723 RNA binding; GO:0003724 RNA helicase activity; GO:0003729 mRNA binding; GO:0003824 catalytic activity; GO:0004004 ATP-dependent RNA helicase activity; GO:0004386 helicase activity; GO:0005488 binding; GO:0008026 ATP-dependent helicase activity; GO:0008186 RNA-dependent ATPase activity; GO:0016462 pyrophosphatase activity; GO:0016787 hydrolase activity; …	K12823	DDX5, DBP2; ATP-dependent RNA helicase DDX5/DBP2 [EC:3.6.4.13]	cann03040 Spliceosome	PF00270	DEAD/DEAH box helicase
Capana03g001245	ADPRM_BOVIN Manganese-dependent ADP-ribose/CDP-alcohol diphosphatase OS=Bos taurus PE=2 SV=2	0.628	Down	0.0135025	---	35.878	18.2	18	3	3	149780	148440	0	140800	113130	0	98777	0	88496	60457	97344	99328	0	81831	124100	134450	120400	114390	70756	120880	0	90840	117060	72262	cytoplasm				K01517	ADPRM; manganese-dependent ADP-ribose/CDP-alcohol diphosphatase [EC:3.6.1.13 3.6.1.16 3.6.1.53]	cann00230 Purine metabolism; cann00564 Glycerophospholipid metabolism; cann01100 Metabolic pathways	PF00149	Calcineurin-like phosphoesterase
Capana03g001304	PDCD4_CHICK Programmed cell death protein 4 OS=Gallus gallus GN=PDCD4 PE=2 SV=1	2.061	Up	1.90779e-05	PDCD4	45.729	20.1	23	6	3	29112	30208	27607	23699	23762	21635	59247	58435	61448	34857	38681	32193	28159	25021	25144	43887	55625	39983	60663	73192	77522	0	0	0	chloroplast
Capana03g001305	PDCD4_RAT Programmed cell death protein 4 OS=Rattus norvegicus GN=Pdcd4 PE=1 SV=2	1.958	Up	0.0181584	Pdcd4	38.427	28.3	30	7	5	41310	29885	36275	26009	31291	19805	53974	67962	88514	31506	35171	34182	23797	26046	31160	33381	45145	58550	76170	77223	71806	0	0	0	chloroplast
Capana03g001331	TBG1_ARATH Tubulin gamma-1 chain OS=Arabidopsis thaliana GN=TUBG1 PE=2 SV=1	0.636	Down	3.723e-05	TUBG1	53.19	27.5	64	6	5	128760	125260	129070	108810	116840	119680	81867	78076	83587	91531	86712	82203	95983	89239	91452	86614	79363	87619	71667	72849	69671	0	43220	44861	cytoplasm	GO:0000278 mitotic cell cycle; GO:0000281 mitotic cytokinesis; GO:0000902 cell morphogenesis; GO:0000904 cell morphogenesis involved in differentiation; GO:0000910 cytokinesis; GO:0000911 cytokinesis by cell plate formation; GO:0007049 cell cycle; GO:0007275 multicellular organism development; GO:0009605 response to external stimulus; GO:0009607 response to biotic stimulus; GO:0009624 response to…	GO:0005618 cell wall; GO:0005622 intracellular; GO:0005623 cell; GO:0005634 nucleus; GO:0005635 nuclear envelope; GO:0005737 cytoplasm; GO:0005739 mitochondrion; GO:0005856 cytoskeleton; GO:0005874 microtubule; GO:0005886 plasma membrane; GO:0005938 cell cortex; GO:0012505 endomembrane system; GO:0015630 microtubule cytoskeleton; GO:0016020 membrane; GO:0030312 external encapsulating structure; G…		K10389	TUBG; tubulin gamma		PF00091; PF03953	Tubulin/FtsZ family, GTPase domain; Tubulin C-terminal domain
Capana03g001348	S1 motif domain-containing protein	3.072	Up	0.0130431	---	30.393	17.2	19	3	3	18968	0	12596	15387	15674	11140	50477	38362	56477	12887	0	18472	0	16554	0	0	0	15416	47765	51443	41577	0	0	0	nucleus		GO:0000229 cytoplasmic chromosome; GO:0005622 intracellular; GO:0005623 cell; GO:0005694 chromosome; GO:0005737 cytoplasm; GO:0005829 cytosol; GO:0009295 nucleoid; GO:0009507 chloroplast; GO:0009508 plastid chromosome; GO:0009532 plastid stroma; GO:0009536 plastid; GO:0009570 chloroplast stroma; GO:0042646 plastid nucleoid; GO:0043226 organelle; GO:0043227 membrane-bounded organelle; GO:0043228 n…
Capana03g001365	4CLL9_ARATH 4-coumarate--CoA ligase-like 9 OS=Arabidopsis thaliana GN=4CLL9 PE=1 SV=2	0.557	Down	0.0173834	4CLL9	54.722	19.2	24	6	6	43012	55356	38191	61972	0	27213	21484	30386	24213	34119	31341	28391	40934	45815	60102	33842	36415	26080	0	0	34908	38994	70011	0	plasma membrane							PF13193	Domain of unknown function (DUF4009)
Capana03g001437	BGAL3_ORYSJ Beta-galactosidase 3 OS=Oryza sativa subsp. japonica GN=Os01g0875500 PE=2 SV=1	0.543	Down	1.8851e-06	Os01g0875500	91.229	21.9	133	12	12	576910	563240	552770	620290	599990	602170	313390	302320	302840	411160	411430	374160	498680	510880	499210	393180	398370	402540	325870	355080	342670	589770	633310	648390	chloroplast	GO:0009628 response to abiotic stimulus; GO:0050896 response to stimulus; GO:0080167 response to karrikin;	GO:0005618 cell wall; GO:0005622 intracellular; GO:0005623 cell; GO:0005737 cytoplasm; GO:0005773 vacuole; GO:0009505 plant-type cell wall; GO:0030312 external encapsulating structure; GO:0043226 organelle; GO:0043227 membrane-bounded organelle; GO:0043229 intracellular organelle; GO:0043231 intracellular membrane-bounded organelle; GO:0044424 intracellular part; GO:0044444 cytoplasmic part; GO:0…	GO:0003824 catalytic activity; GO:0004553 hydrolase activity, hydrolyzing O-glycosyl compounds; GO:0004565 beta-galactosidase activity; GO:0015925 galactosidase activity; GO:0016787 hydrolase activity; GO:0016798 hydrolase activity, acting on glycosyl bonds;				PF01301; PF02140	Glycosyl hydrolases family 35; Galactose binding lectin domain
Capana03g001487	ASP_THECC 21 kDa seed protein OS=Theobroma cacao GN=ASP PE=2 SV=1	0.632	Down	0.00115734	ASP	23.376	38.5	137	6	6	2390600	2479500	2560700	3085800	3129400	3168900	1667800	1408900	1621700	5079400	4998300	4906000	0	0	8684.6	43751	30394	44649	71071	73512	98704	201270	216140	214490	cytoplasm							PF00197	Trypsin and protease inhibitor
Capana03g001523	TBCB_CAEEL Tubulin-specific chaperone B OS=Caenorhabditis elegans GN=F53F4.3 PE=1 SV=1	0.579	Down	0.00139902	F53F4.3	27.258	22.4	27	3	3	62979	63840	51785	42656	44583	41505	33807	35327	34207	43263	23812	44094	35370	36102	37099	59359	38046	36197	29014	59500	43625	48166	54188	0	chloroplast	GO:0000003 reproduction; GO:0003006 developmental process involved in reproduction; GO:0007275 multicellular organism development; GO:0009790 embryo development; GO:0009791 post-embryonic development; GO:0009793 embryo development ending in seed dormancy; GO:0009987 cellular process; GO:0010154 fruit development; GO:0022414 reproductive process; GO:0032501 multicellular organismal process; GO:003…	GO:0005622 intracellular; GO:0005623 cell; GO:0005634 nucleus; GO:0005737 cytoplasm; GO:0005829 cytosol; GO:0009524 phragmoplast; GO:0043226 organelle; GO:0043227 membrane-bounded organelle; GO:0043229 intracellular organelle; GO:0043231 intracellular membrane-bounded organelle; GO:0044424 intracellular part; GO:0044444 cytoplasmic part; GO:0044464 cell part;		K17262	TBCB, CKAP1, ALF1; tubulin-folding cofactor B		PF01302	CAP-Gly domain
Capana03g001660	Putative ovule protein	0.462	Down	0.0178768	---	51.633	13.1	13	4	4	127340	89881	99964	57222	86516	98951	62083	50430	34065	73228	85593	76417	0	0	55464	0	0	0	0	0	0	0	48636	0	vacuolar membrane							PF07712	Stress up-regulated Nod 19
Capana03g001693	DNA-binding protein SMUBP-2	1.684	Up	0.026057	---	28.971	23	26	5	5	68072	60883	97260	61507	62832	59935	125590	142190	113310	60671	49991	61740	64357	65622	65053	88406	99407	75230	118900	92585	117280	0	0	21167	chloroplast	GO:0006996 organelle organization; GO:0009987 cellular process; GO:0016043 cellular component organization; GO:0032392 DNA geometric change; GO:0032508 DNA duplex unwinding; GO:0051276 chromosome organization; GO:0071103 DNA conformation change; GO:0071840 cellular component organization or biogenesis;	GO:0005622 intracellular; GO:0005623 cell; GO:0005634 nucleus; GO:0005737 cytoplasm; GO:0043226 organelle; GO:0043227 membrane-bounded organelle; GO:0043229 intracellular organelle; GO:0043231 intracellular membrane-bounded organelle; GO:0044424 intracellular part; GO:0044464 cell part;	GO:0000049 tRNA binding; GO:0000166 nucleotide binding; GO:0003676 nucleic acid binding; GO:0003678 DNA helicase activity; GO:0003723 RNA binding; GO:0003724 RNA helicase activity; GO:0003824 catalytic activity; GO:0004003 ATP-dependent DNA helicase activity; GO:0004004 ATP-dependent RNA helicase activity; GO:0004386 helicase activity; GO:0005488 binding; GO:0005515 protein binding; GO:0005524 AT…
Capana03g001694	SMBP2_HUMAN DNA-binding protein SMUBP-2 OS=Homo sapiens GN=IGHMBP2 PE=1 SV=3	1.609	Up	0.00013527	IGHMBP2	77.491	36.1	173	16	16	397730	411240	441640	345940	329810	364140	656800	680870	674610	370640	398760	358480	382670	412270	401880	467300	440030	522620	513030	582850	593220	137890	113610	158270	cytoplasm	GO:0006996 organelle organization; GO:0009987 cellular process; GO:0016043 cellular component organization; GO:0032392 DNA geometric change; GO:0032508 DNA duplex unwinding; GO:0051276 chromosome organization; GO:0071103 DNA conformation change; GO:0071840 cellular component organization or biogenesis;	GO:0005622 intracellular; GO:0005623 cell; GO:0005634 nucleus; GO:0005737 cytoplasm; GO:0043226 organelle; GO:0043227 membrane-bounded organelle; GO:0043229 intracellular organelle; GO:0043231 intracellular membrane-bounded organelle; GO:0044424 intracellular part; GO:0044464 cell part;	GO:0000049 tRNA binding; GO:0000166 nucleotide binding; GO:0003676 nucleic acid binding; GO:0003678 DNA helicase activity; GO:0003723 RNA binding; GO:0003724 RNA helicase activity; GO:0003824 catalytic activity; GO:0004003 ATP-dependent DNA helicase activity; GO:0004004 ATP-dependent RNA helicase activity; GO:0004386 helicase activity; GO:0005488 binding; GO:0005515 protein binding; GO:0005524 AT…				PF13086; PF13087	AAA domain; AAA domain
Capana03g001732	4CL2_SOYBN 4-coumarate--CoA ligase 2 OS=Glycine max PE=2 SV=2	0.531	Down	0.0016566	---	37.806	16.2	34	4	4	48475	51055	54704	63743	55904	56452	29205	29450	23250	17009	27461	16697	42374	56936	47368	58712	40474	58952	38403	20746	29744	0	0	24717	cytoplasm	GO:0006725 cellular aromatic compound metabolic process; GO:0007275 multicellular organism development; GO:0008152 metabolic process; GO:0009555 pollen development; GO:0009653 anatomical structure morphogenesis; GO:0009698 phenylpropanoid metabolic process; GO:0009987 cellular process; GO:0010208 pollen wall assembly; GO:0010584 pollen exine formation; GO:0010927 cellular component assembly invol…		GO:0003824 catalytic activity; GO:0016207 4-coumarate-CoA ligase activity; GO:0016405 CoA-ligase activity; GO:0016874 ligase activity; GO:0016877 ligase activity, forming carbon-sulfur bonds; GO:0016878 acid-thiol ligase activity;	K01904	4CL; 4-coumarate--CoA ligase [EC:6.2.1.12]	cann00130 Ubiquinone and other terpenoid-quinone biosynthesis; cann00940 Phenylpropanoid biosynthesis; cann00999 Biosynthesis of secondary metabolites - unclassified; cann01100 Metabolic pathways; cann01110 Biosynthesis of secondary metabolites
Capana03g001772	Putative hydrogen peroxide induced protein 1-like	1.514	Up	0.010157	---	13.414	55.6	50	4	4	80581	59649	68980	90260	80499	76942	108790	108700	99357	95210	103550	113920	97685	91148	90039	149310	126610	130870	89617	118370	111990	18563	30678	54869	mitochondria
Capana03g001821	SUBL_ARATH Subtilisin-like protease OS=Arabidopsis thaliana GN=ARA12 PE=1 SV=1	0.658	Down	0.002716	ARA12	82.009	21	209	11	11	902730	841220	851900	771770	876960	841210	570610	566410	571550	509050	567240	559430	742060	714800	693270	607570	589930	615300	501260	503810	500560	630310	632910	613280	chloroplast							PF05922; PF00082	Peptidase inhibitor I9; Subtilase family
Capana03g001918	Putative ovule protein	0.666	Down	0.0093353	---	62.086	22.3	114	8	8	333070	286520	270380	288210	263110	256510	196770	177590	218510	256930	269180	246160	221090	220980	216930	261920	236350	229520	280020	257060	288230	248680	257010	261500	nucleus
Capana03g001974	"TL17_ARATH Thylakoid lumenal 17.4 kDa protein, chloroplastic OS=Arabidopsis thaliana GN=At5g53490 PE=1 SV=2"	1.595	Up	0.021682	At5g53490	25.623	35	159	7	7	847410	1037100	1322300	1280500	1384200	1528500	1811600	1654800	1648900	2154500	2026600	2116300	1462500	1446000	1452100	889670	1286900	1321100	1517200	1603300	1690200	3182600	2806400	2603300	chloroplast
Capana03g002051	PTBP2_ARATH Polypyrimidine tract-binding protein homolog 2 OS=Arabidopsis thaliana GN=At5g53180 PE=2 SV=1	0.608	Down	0.0080414	At5g53180	53.793	17.4	56	5	5	181630	177160	158170	192730	196780	196930	87677	121270	105100	129320	118550	111360	168680	180530	163940	174010	162220	160260	97711	109040	100760	194800	196050	214990	extracellular	GO:0000381 regulation of alternative mRNA splicing, via spliceosome; GO:0006417 regulation of translation; GO:0007275 multicellular organism development; GO:0009791 post-embryonic development; GO:0009845 seed germination; GO:0009889 regulation of biosynthetic process; GO:0010468 regulation of gene expression; GO:0010556 regulation of macromolecule biosynthetic process; GO:0010608 posttranscriptio…	GO:0000932 P-body; GO:0005622 intracellular; GO:0005623 cell; GO:0005634 nucleus; GO:0005737 cytoplasm; GO:0032991 macromolecular complex; GO:0035770 ribonucleoprotein granule; GO:0036464 cytoplasmic ribonucleoprotein granule; GO:0043226 organelle; GO:0043227 membrane-bounded organelle; GO:0043228 non-membrane-bounded organelle; GO:0043229 intracellular organelle; GO:0043231 intracellular membran…	GO:0003676 nucleic acid binding; GO:0003723 RNA binding; GO:0003729 mRNA binding; GO:0005488 binding; GO:0097159 organic cyclic compound binding; GO:1901363 heterocyclic compound binding;	K14948	PTBP2, NPTB; polypyrimidine tract-binding protein 2		PF00076	RNA recognition motif. (a.k.a. RRM, RBD, or RNP domain)
Capana03g002084	"KPYG_TOBAC Pyruvate kinase isozyme G, chloroplastic OS=Nicotiana tabacum PE=2 SV=1"	0.627	Down	3.7089e-06	---	63.827	44.3	288	17	15	1384800	1376500	1341700	1289600	1254300	1339800	837610	873650	861970	1316900	1303400	1292300	1291800	1217300	1285300	1179200	1230100	1092500	1222700	1187600	1224300	1335700	1361200	1289500	chloroplast	GO:0000003 reproduction; GO:0003006 developmental process involved in reproduction; GO:0005975 carbohydrate metabolic process; GO:0006082 organic acid metabolic process; GO:0006090 pyruvate metabolic process; GO:0006091 generation of precursor metabolites and energy; GO:0006096 glycolytic process; GO:0006139 nucleobase-containing compound metabolic process; GO:0006163 purine nucleotide metabolic …	GO:0005622 intracellular; GO:0005623 cell; GO:0005737 cytoplasm; GO:0005739 mitochondrion; GO:0009507 chloroplast; GO:0009532 plastid stroma; GO:0009536 plastid; GO:0009570 chloroplast stroma; GO:0043226 organelle; GO:0043227 membrane-bounded organelle; GO:0043229 intracellular organelle; GO:0043231 intracellular membrane-bounded organelle; GO:0044422 organelle part; GO:0044424 intracellular part…	GO:0000287 magnesium ion binding; GO:0003824 catalytic activity; GO:0004743 pyruvate kinase activity; GO:0005488 binding; GO:0016740 transferase activity; GO:0016772 transferase activity, transferring phosphorus-containing groups; GO:0016773 phosphotransferase activity, alcohol group as acceptor; GO:0030955 potassium ion binding; GO:0031420 alkali metal ion binding; GO:0043167 ion binding; GO:004…	K00873	PK, pyk; pyruvate kinase [EC:2.7.1.40]	cann00010 Glycolysis / Gluconeogenesis; cann00230 Purine metabolism; cann00620 Pyruvate metabolism; cann01100 Metabolic pathways; cann01110 Biosynthesis of secondary metabolites; cann01200 Carbon metabolism; cann01230 Biosynthesis of amino acids	PF02887	Pyruvate kinase, alpha/beta domain
Capana03g002188	FBRL_XENLA rRNA 2'-O-methyltransferase fibrillarin OS=Xenopus laevis GN=fbl PE=2 SV=1	0.651	Down	2.2555e-05	fbl	26.47	34.5	191	8	8	861600	811710	830660	969980	967770	1007600	552220	542940	536340	605890	565470	603830	856470	832000	858730	815380	856080	827430	721990	743630	710340	727510	739360	726680	cytoplasm	GO:0000154 rRNA modification; GO:0000494 box C/D snoRNA 3'-end processing; GO:0001510 RNA methylation; GO:0006139 nucleobase-containing compound metabolic process; GO:0006325 chromatin organization; GO:0006364 rRNA processing; GO:0006396 RNA processing; GO:0006464 cellular protein modification process; GO:0006479 protein methylation; GO:0006725 cellular aromatic compound metabolic process; GO:000…	GO:0005622 intracellular; GO:0005623 cell; GO:0005634 nucleus; GO:0005654 nucleoplasm; GO:0005730 nucleolus; GO:0005732 small nucleolar ribonucleoprotein complex; GO:0015030 Cajal body; GO:0016020 membrane; GO:0016592 mediator complex; GO:0016604 nuclear body; GO:0030684 preribosome; GO:0031428 box C/D snoRNP complex; GO:0031974 membrane-enclosed lumen; GO:0031981 nuclear lumen; GO:0032040 small-…	GO:0003676 nucleic acid binding; GO:0003723 RNA binding; GO:0003824 catalytic activity; GO:0004518 nuclease activity; GO:0004540 ribonuclease activity; GO:0005488 binding; GO:0008168 methyltransferase activity; GO:0008170 N-methyltransferase activity; GO:0008173 RNA methyltransferase activity; GO:0008276 protein methyltransferase activity; GO:0008649 rRNA methyltransferase activity; GO:0008757 S-…	K14563	NOP1, FBL; rRNA 2'-O-methyltransferase fibrillarin [EC:2.1.1.-]	cann03008 Ribosome biogenesis in eukaryotes	PF01269	Fibrillarin
Capana03g002243	Putative ovule protein	1.568	Up	0.0052383	---	104.91	34.2	169	18	16	434130	366420	355800	321140	289220	284220	554670	593030	664960	476930	472590	424650	309260	365910	353580	565350	539800	542760	804840	792660	688500	122310	101940	138610	chloroplast
Capana03g002476	CID2A_ONCMY CDGSH iron-sulfur domain-containing protein 2A OS=Oncorhynchus mykiss GN=cisd2a PE=2 SV=1	1.636	Up	2.1595e-05	cisd2a	11.322	24.5	49	2	2	618990	650550	655750	683040	674630	723710	1060800	1024400	1063900	1079200	1076900	1062800	620690	645350	655900	915870	851440	846260	1225800	1089200	1086000	634320	631530	626490	chloroplast	GO:0000422 mitophagy; GO:0006914 autophagy; GO:0006996 organelle organization; GO:0007005 mitochondrion organization; GO:0007275 multicellular organism development; GO:0007568 aging; GO:0008152 metabolic process; GO:0009056 catabolic process; GO:0009894 regulation of catabolic process; GO:0009987 cellular process; GO:0010150 leaf senescence; GO:0010259 multicellular organism aging; GO:0010506 reg…	GO:0005622 intracellular; GO:0005623 cell; GO:0005737 cytoplasm; GO:0005739 mitochondrion; GO:0005740 mitochondrial envelope; GO:0005741 mitochondrial outer membrane; GO:0005783 endoplasmic reticulum; GO:0005789 endoplasmic reticulum membrane; GO:0009507 chloroplast; GO:0009532 plastid stroma; GO:0009536 plastid; GO:0009570 chloroplast stroma; GO:0012505 endomembrane system; GO:0016020 membrane; …	GO:0005488 binding; GO:0005515 protein binding; GO:0042802 identical protein binding; GO:0042803 protein homodimerization activity; GO:0046983 protein dimerization activity; GO:0048037 cofactor binding; GO:0051536 iron-sulfur cluster binding; GO:0051537 2 iron, 2 sulfur cluster binding; GO:0051540 metal cluster binding;
Capana03g002567	PX114_ORYSJ Peroxisomal membrane protein 11-4 OS=Oryza sativa subsp. japonica GN=PEX11-4 PE=2 SV=2	1.671	Up	0.0071047	PEX11-4	25.533	19.6	53	4	4	91600	111830	130080	139850	146780	135510	181300	183500	192510	134440	134380	130180	146240	147430	150940	96890	125400	152590	125100	130030	138130	109770	95475	108700	chloroplast	GO:0006996 organelle organization; GO:0007031 peroxisome organization; GO:0009987 cellular process; GO:0016043 cellular component organization; GO:0016559 peroxisome fission; GO:0032535 regulation of cellular component size; GO:0044375 regulation of peroxisome size; GO:0048285 organelle fission; GO:0065007 biological regulation; GO:0065008 regulation of biological quality; GO:0071840 cellular com…	GO:0005622 intracellular; GO:0005623 cell; GO:0005737 cytoplasm; GO:0005777 peroxisome; GO:0005778 peroxisomal membrane; GO:0016020 membrane; GO:0031090 organelle membrane; GO:0031903 microbody membrane; GO:0042579 microbody; GO:0043226 organelle; GO:0043227 membrane-bounded organelle; GO:0043229 intracellular organelle; GO:0043231 intracellular membrane-bounded organelle; GO:0044422 organelle pa…	GO:0005488 binding; GO:0005515 protein binding; GO:0042802 identical protein binding;
Capana03g002814	LST8_DICDI Protein LST8 homolog OS=Dictyostelium discoideum GN=lst8 PE=1 SV=1	0.663	Down	0.00184062	lst8	32.943	37.6	72	8	8	165580	142760	147510	164090	144510	157950	102060	94480	105730	89603	93782	84922	140460	133490	136560	144910	141640	126100	91236	91080	77361	171730	178450	181100	cytoplasm				K08266	MLST8, GBL; target of rapamycin complex subunit LST8	cann04136 Autophagy - other
Capana03g003033	DUF4057 domain-containing protein (Fragment)	0.34	Down	0.0155223	---	29.193	32.8	44	5	5	103970	75515	97614	105410	70175	80479	17480	39253	37372	142110	185270	165490	81071	87553	131840	99050	114260	120440	136800	129750	121350	190510	231230	233520	nucleus
Capana03g003115	"Rhodanese-like domain-containing protein 9, chloroplastic"	2.191	Up	0.0076993	---	22.905	49.3	66	9	9	148850	168380	246930	255710	254920	291100	459390	383950	392210	384620	389510	349490	327820	324240	348790	291660	291400	354350	446650	442630	442180	465070	505690	570420	chloroplast		GO:0005622 intracellular; GO:0005623 cell; GO:0005737 cytoplasm; GO:0009507 chloroplast; GO:0009534 chloroplast thylakoid; GO:0009535 chloroplast thylakoid membrane; GO:0009536 plastid; GO:0009579 thylakoid; GO:0016020 membrane; GO:0031976 plastid thylakoid; GO:0031984 organelle subcompartment; GO:0034357 photosynthetic membrane; GO:0042651 thylakoid membrane; GO:0043226 organelle; GO:0043227 mem…					PF00581	Rhodanese-like domain
Capana03g003654	GUN17_ARATH Endoglucanase 17 OS=Arabidopsis thaliana GN=At4g02290 PE=2 SV=1	0.422	Down	6.0662e-05	At4g02290	55.804	25.1	64	7	7	165990	159620	154900	162440	177170	149400	0	67375	67782	109300	87203	107770	191150	181060	170150	171780	137550	176530	155900	153240	156690	183260	195130	196850	chloroplast	GO:0007275 multicellular organism development; GO:0007389 pattern specification process; GO:0009605 response to external stimulus; GO:0009607 response to biotic stimulus; GO:0009624 response to nematode; GO:0032501 multicellular organismal process; GO:0032502 developmental process; GO:0043207 response to external biotic stimulus; GO:0048856 anatomical structure development; GO:0050896 response to…		GO:0003824 catalytic activity; GO:0004553 hydrolase activity, hydrolyzing O-glycosyl compounds; GO:0008810 cellulase activity; GO:0016787 hydrolase activity; GO:0016798 hydrolase activity, acting on glycosyl bonds;	K01179	E3.2.1.4; endoglucanase [EC:3.2.1.4]	cann00500 Starch and sucrose metabolism; cann01100 Metabolic pathways	PF00759	Glycosyl hydrolase family 9
Capana03g003798	ARFRP_PONAB ADP-ribosylation factor-related protein 1 OS=Pongo abelii GN=ARFRP1 PE=2 SV=1	0.66	Down	0.039918	ARFRP1	22.884	22.1	20	3	3	35125	31180	37370	24044	42965	41496	28411	17904	22084	15340	22763	20866	14904	32785	27978	29720	0	21477	0	23445	0	61171	51562	34937	chloroplast				K07952	ARFRP1; ADP-ribosylation factor related protein 1		PF00025	ADP-ribosylation factor family
Capana03g004067	SPSA2_CRAPL Probable sucrose-phosphate synthase 2 OS=Craterostigma plantagineum GN=SPS2 PE=2 SV=1	1.917	Up	0.00032018	SPS2	120.24	20.9	134	15	14	209720	197920	179210	145720	133890	132150	371400	398260	355890	144470	153430	183740	183880	211710	178070	326350	339210	368500	400100	399250	366990	105730	73295	73784	nucleus		GO:0005622 intracellular; GO:0005623 cell; GO:0005737 cytoplasm; GO:0005794 Golgi apparatus; GO:0012505 endomembrane system; GO:0043226 organelle; GO:0043227 membrane-bounded organelle; GO:0043229 intracellular organelle; GO:0043231 intracellular membrane-bounded organelle; GO:0044424 intracellular part; GO:0044444 cytoplasmic part; GO:0044464 cell part;	GO:0003824 catalytic activity; GO:0008194 UDP-glycosyltransferase activity; GO:0016740 transferase activity; GO:0016757 transferase activity, transferring glycosyl groups; GO:0016758 transferase activity, transferring hexosyl groups; GO:0035251 UDP-glucosyltransferase activity; GO:0046524 sucrose-phosphate synthase activity; GO:0046527 glucosyltransferase activity;	K00696	E2.4.1.14; sucrose-phosphate synthase [EC:2.4.1.14]	cann00500 Starch and sucrose metabolism; cann01100 Metabolic pathways
Capana03g004088	GAE6_ARATH UDP-glucuronate 4-epimerase 6 OS=Arabidopsis thaliana GN=GAE6 PE=1 SV=1	0.488	Down	0.0061628	GAE6	49.797	23.7	45	6	6	637740	636230	653310	443450	497980	489410	281760	341530	317310	0	236420	157820	629500	630100	656130	328970	362040	378970	286780	284080	214750	225780	220690	278990	cytoplasm	GO:0005975 carbohydrate metabolic process; GO:0005996 monosaccharide metabolic process; GO:0006063 uronic acid metabolic process; GO:0006082 organic acid metabolic process; GO:0006950 response to stress; GO:0006952 defense response; GO:0008152 metabolic process; GO:0009058 biosynthetic process; GO:0009605 response to external stimulus; GO:0009607 response to biotic stimulus; GO:0009617 response t…	GO:0005622 intracellular; GO:0005623 cell; GO:0005737 cytoplasm; GO:0005768 endosome; GO:0005794 Golgi apparatus; GO:0005802 trans-Golgi network; GO:0012505 endomembrane system; GO:0031410 cytoplasmic vesicle; GO:0031982 vesicle; GO:0031984 organelle subcompartment; GO:0043226 organelle; GO:0043227 membrane-bounded organelle; GO:0043229 intracellular organelle; GO:0043231 intracellular membrane-b…		K08679	E5.1.3.6; UDP-glucuronate 4-epimerase [EC:5.1.3.6]	cann00520 Amino sugar and nucleotide sugar metabolism; cann01100 Metabolic pathways
Capana03g004199	CTL1_ARATH Chitinase-like protein 1 OS=Arabidopsis thaliana GN=CTL1 PE=1 SV=1	0.442	Down	0.0130178	CTL1	22.974	34.4	31	4	4	114640	95578	89415	76399	67372	46626	36050	34929	61575	52379	54776	0	74023	102080	61834	79521	87806	110540	42475	56192	89969	43380	78801	78559	mitochondria	GO:0000271 polysaccharide biosynthetic process; GO:0001101 response to acid chemical; GO:0005975 carbohydrate metabolic process; GO:0005976 polysaccharide metabolic process; GO:0006073 cellular glucan metabolic process; GO:0006950 response to stress; GO:0006970 response to osmotic stress; GO:0007275 multicellular organism development; GO:0008152 metabolic process; GO:0009058 biosynthetic process;…	GO:0005576 extracellular region; GO:0005622 intracellular; GO:0005623 cell; GO:0005737 cytoplasm; GO:0005794 Golgi apparatus; GO:0012505 endomembrane system; GO:0043226 organelle; GO:0043227 membrane-bounded organelle; GO:0043229 intracellular organelle; GO:0043231 intracellular membrane-bounded organelle; GO:0044424 intracellular part; GO:0044444 cytoplasmic part; GO:0044464 cell part; GO:004804…	GO:0001871 pattern binding; GO:0005488 binding; GO:0030246 carbohydrate binding; GO:0030247 polysaccharide binding;				PF00182	Chitinase class I
Capana03g004269	"PWD_ORYSJ Phosphoglucan, water dikinase, chloroplastic OS=Oryza sativa subsp. japonica GN=GWD3 PE=3 SV=2"	1.527	Up	0.00070242	GWD3	26.055	19.2	41	5	5	233350	211650	216630	171080	160170	182460	320060	358990	331610	224670	201050	201290	252330	234470	244680	330700	370160	345330	369950	405060	387450	122100	110990	195560	extracellular	GO:0000272 polysaccharide catabolic process; GO:0005975 carbohydrate metabolic process; GO:0005976 polysaccharide metabolic process; GO:0005982 starch metabolic process; GO:0005983 starch catabolic process; GO:0006073 cellular glucan metabolic process; GO:0006464 cellular protein modification process; GO:0006468 protein phosphorylation; GO:0006793 phosphorus metabolic process; GO:0006796 phosphat…	GO:0005622 intracellular; GO:0005623 cell; GO:0005737 cytoplasm; GO:0009507 chloroplast; GO:0009532 plastid stroma; GO:0009536 plastid; GO:0009570 chloroplast stroma; GO:0043226 organelle; GO:0043227 membrane-bounded organelle; GO:0043229 intracellular organelle; GO:0043231 intracellular membrane-bounded organelle; GO:0044422 organelle part; GO:0044424 intracellular part; GO:0044434 chloroplast p…	GO:0003824 catalytic activity; GO:0016301 kinase activity; GO:0016740 transferase activity; GO:0016772 transferase activity, transferring phosphorus-containing groups; GO:0016781 phosphotransferase activity, paired acceptors; GO:0019200 carbohydrate kinase activity; GO:0051752 phosphoglucan, water dikinase activity;	K15535	PWD; phosphoglucan, water dikinase [EC:2.7.9.5]
Capana03g004371	PLY15_ARATH Probable pectate lyase 15 OS=Arabidopsis thaliana GN=At4g13710 PE=2 SV=1	0.482	Down	0.0029759	At4g13710	49.085	11	17	3	3	63746	54827	50736	67757	49637	53083	24827	24384	32374	0	36607	26013	65555	62587	74421	81907	43595	61317	43582	44736	0	75674	77470	68750	extracellular		GO:0016020 membrane;		K01728	pel; pectate lyase [EC:4.2.2.2]	cann00040 Pentose and glucuronate interconversions; cann01100 Metabolic pathways	PF00544	Pectate lyase
Capana03g004589	NOP5B_ARATH Probable nucleolar protein 5-2 OS=Arabidopsis thaliana GN=NOP5-2 PE=2 SV=1	0.613	Down	0.00041835	NOP5-2	61.425	42.5	267	16	7	656150	631580	598590	593440	558450	529830	375630	366860	413530	398310	396090	405330	458550	467490	405940	550000	506070	490630	417960	405360	380630	215070	222110	219150	cytoplasm	GO:0000154 rRNA modification; GO:0006139 nucleobase-containing compound metabolic process; GO:0006364 rRNA processing; GO:0006396 RNA processing; GO:0006725 cellular aromatic compound metabolic process; GO:0006807 nitrogen compound metabolic process; GO:0008152 metabolic process; GO:0009451 RNA modification; GO:0009987 cellular process; GO:0010467 gene expression; GO:0016070 RNA metabolic process…	GO:0005622 intracellular; GO:0005623 cell; GO:0005634 nucleus; GO:0005730 nucleolus; GO:0005732 small nucleolar ribonucleoprotein complex; GO:0016020 membrane; GO:0030684 preribosome; GO:0031428 box C/D snoRNP complex; GO:0031974 membrane-enclosed lumen; GO:0031981 nuclear lumen; GO:0032040 small-subunit processome; GO:0032991 macromolecular complex; GO:0043226 organelle; GO:0043227 membrane-boun…	GO:0003676 nucleic acid binding; GO:0003723 RNA binding; GO:0005488 binding; GO:0030515 snoRNA binding; GO:0097159 organic cyclic compound binding; GO:1901363 heterocyclic compound binding;	K14565	NOP58; nucleolar protein 58	cann03008 Ribosome biogenesis in eukaryotes	PF08156	NOP5NT (NUC127) domain
Capana04g000040	DFRA_GERHY Dihydroflavonol-4-reductase OS=Gerbera hybrida GN=DFR PE=2 SV=1	1.521	Up	0.00039883	DFR	10.948	63.5	56	4	4	198220	219380	218860	182050	247900	272570	313980	334790	320010	313650	345150	249580	344660	317430	350740	308570	333730	226610	185850	239230	246440	339320	314760	347790	chloroplast
Capana04g000100	COR47_ARATH Dehydrin COR47 OS=Arabidopsis thaliana GN=COR47 PE=1 SV=2	0.655	Down	0.00018144	COR47	24.612	37.9	163	6	6	2137300	2024000	1979000	1807800	1711900	1690100	1296600	1328000	1398400	1750000	1866500	1812200	1742100	1703100	1687300	1447600	1365800	1243600	1201600	1225100	1159400	504810	489910	487210	nucleus	GO:0001101 response to acid chemical; GO:0006950 response to stress; GO:0009266 response to temperature stimulus; GO:0009409 response to cold; GO:0009414 response to water deprivation; GO:0009415 response to water; GO:0009628 response to abiotic stimulus; GO:0009631 cold acclimation; GO:0009719 response to endogenous stimulus; GO:0009725 response to hormone; GO:0009737 response to abscisic acid; …	GO:0005622 intracellular; GO:0005623 cell; GO:0005634 nucleus; GO:0005737 cytoplasm; GO:0005829 cytosol; GO:0005911 cell-cell junction; GO:0009506 plasmodesma; GO:0016020 membrane; GO:0019898 extrinsic component of membrane; GO:0030054 cell junction; GO:0043226 organelle; GO:0043227 membrane-bounded organelle; GO:0043229 intracellular organelle; GO:0043231 intracellular membrane-bounded organelle…	GO:0001786 phosphatidylserine binding; GO:0003779 actin binding; GO:0005488 binding; GO:0005507 copper ion binding; GO:0005515 protein binding; GO:0005543 phospholipid binding; GO:0008092 cytoskeletal protein binding; GO:0008289 lipid binding; GO:0016151 nickel cation binding; GO:0031210 phosphatidylcholine binding; GO:0043167 ion binding; GO:0043168 anion binding; GO:0043169 cation binding; GO:0…
Capana04g000152	CI023_HUMAN Alba-like protein C9orf23 OS=Homo sapiens GN=C9orf23 PE=1 SV=1	0.626	Down	3.5668e-05	C9orf23	28.243	50	104	8	8	701360	706120	665320	732530	757730	687280	441960	423690	432120	442280	462620	493690	608480	631410	582040	513340	517410	552530	394130	386890	355770	626480	635570	621760	cytoplasm
Capana04g000158	LARP1_HUMAN La-related protein 1 OS=Homo sapiens GN=LARP1 PE=1 SV=2	0.617	Down	0.00192028	LARP1	58.413	27.9	111	9	9	220500	203600	178680	159150	172620	174540	118950	123230	129640	243430	242120	248370	176900	176740	178430	163450	181200	159680	161510	186200	175100	304130	301050	308820	nucleus				K18757	LARP1; la-related protein 1		PF05383	La domain
Capana04g000179	ENPL_CATRO Endoplasmin homolog OS=Catharanthus roseus GN=HSP90 PE=2 SV=1	1.606	Up	0.000176061	HSP90	92.91	34.6	362	23	22	849110	810040	834180	752940	715720	814860	1317300	1269500	1415700	561050	586750	583720	1176400	1218900	1144600	1509600	1504400	1555200	2606600	2569800	2516100	1054400	1123200	1196700	vacuolar membrane	GO:0001101 response to acid chemical; GO:0002790 peptide secretion; GO:0006810 transport; GO:0006950 response to stress; GO:0006970 response to osmotic stress; GO:0008104 protein localization; GO:0009266 response to temperature stimulus; GO:0009306 protein secretion; GO:0009409 response to cold; GO:0009414 response to water deprivation; GO:0009415 response to water; GO:0009628 response to abiotic…	GO:0005576 extracellular region; GO:0005622 intracellular; GO:0005623 cell; GO:0005634 nucleus; GO:0005737 cytoplasm; GO:0005739 mitochondrion; GO:0005773 vacuole; GO:0005774 vacuolar membrane; GO:0005783 endoplasmic reticulum; GO:0005788 endoplasmic reticulum lumen; GO:0005886 plasma membrane; GO:0005911 cell-cell junction; GO:0009506 plasmodesma; GO:0009507 chloroplast; GO:0009536 plastid; GO:0…	GO:0003824 catalytic activity; GO:0016462 pyrophosphatase activity; GO:0016787 hydrolase activity; GO:0016817 hydrolase activity, acting on acid anhydrides; GO:0016818 hydrolase activity, acting on acid anhydrides, in phosphorus-containing anhydrides; GO:0016887 ATPase activity; GO:0017111 nucleoside-triphosphatase activity;	K09487	HSP90B, TRA1; heat shock protein 90kDa beta	cann04141 Protein processing in endoplasmic reticulum; cann04626 Plant-pathogen interaction	PF02518	Histidine kinase-, DNA gyrase B-, and HSP90-like ATPase
Capana04g000195	GUN24_ORYSJ Endoglucanase 24 OS=Oryza sativa subsp. japonica GN=Os09g0533900 PE=2 SV=1	0.459	Down	0.00065668	Os09g0533900	57.6	20.5	77	8	8	250970	228550	274150	223430	254030	205260	114300	128100	103330	107910	105810	128980	207380	191190	202780	194590	162860	141630	76684	70233	73111	264110	303390	279110	vacuolar membrane							PF00759	Glycosyl hydrolase family 9
Capana04g000377	PERQ2_MOUSE PERQ amino acid-rich with GYF domain-containing protein 2 OS=Mus musculus GN=Gigyf2 PE=1 SV=2	0.55	Down	0.00041797	Gigyf2	189.51	28.6	259	29	29	537150	465130	451440	436470	399740	398930	268010	261030	270820	448730	426900	414610	386870	351600	384320	414670	332490	340720	373910	356070	366640	428420	439910	479330	nucleus							PF02213	GYF domain
Capana04g000489	SPZX_ARATH Serpin-ZX OS=Arabidopsis thaliana GN=At1g47710 PE=1 SV=1	1.54	Up	8.2726e-05	At1g47710	43.193	31.3	126	8	7	180220	181560	175760	164170	183180	159110	288610	265210	273240	227920	219960	226360	307960	293480	310200	366840	347570	327440	291510	284590	293130	207220	227710	237690	cytoplasm	GO:0006139 nucleobase-containing compound metabolic process; GO:0006259 DNA metabolic process; GO:0006281 DNA repair; GO:0006725 cellular aromatic compound metabolic process; GO:0006807 nitrogen compound metabolic process; GO:0006950 response to stress; GO:0006974 cellular response to DNA damage stimulus; GO:0008152 metabolic process; GO:0009892 negative regulation of metabolic process; GO:000998…	GO:0005576 extracellular region; GO:0005615 extracellular space; GO:0005622 intracellular; GO:0005623 cell; GO:0005634 nucleus; GO:0005737 cytoplasm; GO:0005829 cytosol; GO:0043226 organelle; GO:0043227 membrane-bounded organelle; GO:0043229 intracellular organelle; GO:0043231 intracellular membrane-bounded organelle; GO:0044421 extracellular region part; GO:0044424 intracellular part; GO:0044444…	GO:0004857 enzyme inhibitor activity; GO:0004866 endopeptidase inhibitor activity; GO:0004867 serine-type endopeptidase inhibitor activity; GO:0004869 cysteine-type endopeptidase inhibitor activity; GO:0030234 enzyme regulator activity; GO:0030414 peptidase inhibitor activity; GO:0061134 peptidase regulator activity; GO:0061135 endopeptidase regulator activity; GO:0098772 molecular function regul…				PF00079	Serpin (serine protease inhibitor)
Capana04g000711	Putative ovule protein	0.613	Down	0.0143977	---	29.482	38	38	5	5	341810	424370	403850	460050	435790	433710	207780	220870	288040	236590	218550	240120	312790	270380	264540	274290	218190	0	0	167300	186770	322060	291880	323220	chloroplast
Capana04g000998	"AROF_SOLTU Phospho-2-dehydro-3-deoxyheptonate aldolase 1, chloroplastic OS=Solanum tuberosum GN=SHKA PE=1 SV=2"	0.374	Down	7.5608e-05	SHKA	59.318	46.3	128	15	11	353560	333790	324720	345410	362910	307100	128910	135760	113810	274810	273690	276260	359320	360690	355250	299740	334720	301440	215000	231240	216800	441920	522390	572100	chloroplast		GO:0005622 intracellular; GO:0005623 cell; GO:0005737 cytoplasm; GO:0009507 chloroplast; GO:0009536 plastid; GO:0043226 organelle; GO:0043227 membrane-bounded organelle; GO:0043229 intracellular organelle; GO:0043231 intracellular membrane-bounded organelle; GO:0044424 intracellular part; GO:0044444 cytoplasmic part; GO:0044464 cell part;		K01626	E2.5.1.54, aroF, aroG, aroH; 3-deoxy-7-phosphoheptulonate synthase [EC:2.5.1.54]	cann00400 Phenylalanine, tyrosine and tryptophan biosynthesis; cann01100 Metabolic pathways; cann01110 Biosynthesis of secondary metabolites; cann01230 Biosynthesis of amino acids	PF01474	Class-II DAHP synthetase family
Capana04g001038	U85A2_ARATH UDP-glycosyltransferase 85A2 OS=Arabidopsis thaliana GN=UGT85A2 PE=2 SV=1	0.423	Down	0.00085949	UGT85A2	54.665	20.3	30	6	5	148900	137080	137250	121520	127030	127600	70988	55901	52291	0	33150	0	28002	34572	37416	29656	22818	16034	0	0	8494.3	0	0	33070	cytoplasm		GO:0005622 intracellular; GO:0005623 cell; GO:0043226 organelle; GO:0043227 membrane-bounded organelle; GO:0043229 intracellular organelle; GO:0043231 intracellular membrane-bounded organelle; GO:0044424 intracellular part; GO:0044464 cell part;	GO:0003824 catalytic activity; GO:0008194 UDP-glycosyltransferase activity; GO:0015020 glucuronosyltransferase activity; GO:0016740 transferase activity; GO:0016757 transferase activity, transferring glycosyl groups; GO:0016758 transferase activity, transferring hexosyl groups; GO:0035251 UDP-glucosyltransferase activity; GO:0046527 glucosyltransferase activity; GO:0080043 quercetin 3-O-glucosylt…
Capana04g001095	DUF4057 domain-containing protein	0.391	Down	0.00024321	---	30.741	42.5	90	8	8	269300	273020	261310	267100	249030	258040	95867	97545	121010	323760	321240	317830	220070	248110	261960	261760	277410	282980	277830	253100	298510	331680	405080	358750	nucleus
Capana04g001174	TPC6B_HUMAN Trafficking protein particle complex subunit 6B OS=Homo sapiens GN=TRAPPC6B PE=1 SV=1	0.43	Down	0.022745	TRAPPC6B	23.603	18	24	2	2	37221	33621	43398	0	40036	30320	12599	0	20176	0	0	0	30624	29381	26889	43438	32918	29455	0	0	0	0	51367	39356	cytoplasm				K20304	TRAPPC6, TRS33; trafficking protein particle complex subunit 6
Capana04g001207	EXOC3_DICDI Exocyst complex component 3 OS=Dictyostelium discoideum GN=exoc3 PE=3 SV=1	3.843	Up	0.000156912	exoc3	89.365	9.5	28	5	5	24639	26906	31084	19919	26707	27134	120390	96050	100860	56155	66613	51152	25710	0	27813	74094	43845	66915	116540	100300	103100	38830	33393	26204	chloroplast	GO:0006810 transport; GO:0006887 exocytosis; GO:0008104 protein localization; GO:0009987 cellular process; GO:0016192 vesicle-mediated transport; GO:0031503 protein complex localization; GO:0032940 secretion by cell; GO:0033036 macromolecule localization; GO:0034613 cellular protein localization; GO:0034629 cellular protein complex localization; GO:0046903 secretion; GO:0051179 localization; GO:0…	GO:0005576 extracellular region; GO:0005615 extracellular space; GO:0005622 intracellular; GO:0005623 cell; GO:0005737 cytoplasm; GO:0005829 cytosol; GO:0031982 vesicle; GO:0043226 organelle; GO:0043227 membrane-bounded organelle; GO:0043230 extracellular organelle; GO:0044421 extracellular region part; GO:0044424 intracellular part; GO:0044444 cytoplasmic part; GO:0044464 cell part; GO:0070062 e…	GO:0000149 SNARE binding; GO:0005488 binding; GO:0005515 protein binding;	K06110	EXOC3, SEC6; exocyst complex component 3
Capana04g001288	ASR1_SOLLC Abscisic stress-ripening protein 1 OS=Solanum lycopersicum GN=ASR1 PE=2 SV=1	0.559	Down	0.00133955	ASR1	12.729	56.2	155	5	5	1601100	1372100	1263700	1441500	1272200	1224000	760860	816110	793040	1746100	1733500	1755000	654960	700920	702030	829430	832710	700250	932260	836540	814030	919070	1001100	1191700	mitochondria	GO:0001101 response to acid chemical; GO:0006950 response to stress; GO:0009414 response to water deprivation; GO:0009415 response to water; GO:0009628 response to abiotic stimulus; GO:0010035 response to inorganic substance; GO:0042221 response to chemical; GO:0050896 response to stimulus; GO:1901700 response to oxygen-containing compound;	GO:0005622 intracellular; GO:0005623 cell; GO:0005634 nucleus; GO:0032991 macromolecular complex; GO:0043226 organelle; GO:0043227 membrane-bounded organelle; GO:0043229 intracellular organelle; GO:0043231 intracellular membrane-bounded organelle; GO:0044424 intracellular part; GO:0044464 cell part;	GO:0005488 binding; GO:0005515 protein binding; GO:0008270 zinc ion binding; GO:0042802 identical protein binding; GO:0042803 protein homodimerization activity; GO:0043167 ion binding; GO:0043169 cation binding; GO:0046872 metal ion binding; GO:0046914 transition metal ion binding; GO:0046983 protein dimerization activity;
Capana04g001381	DCHS_SOLLC Histidine decarboxylase OS=Solanum lycopersicum GN=HDC PE=2 SV=1	0.579	Down	0.027701	HDC	48.189	6.6	13	2	2	35237	26376	27284	0	22977	0	17176	0	17158	0	19119	19221	25950	37172	26745	0	22945	21209	23251	23127	0	0	16495	14436	chloroplast	GO:0006066 alcohol metabolic process; GO:0006576 cellular biogenic amine metabolic process; GO:0006580 ethanolamine metabolic process; GO:0006807 nitrogen compound metabolic process; GO:0008152 metabolic process; GO:0009308 amine metabolic process; GO:0009987 cellular process; GO:0034308 primary alcohol metabolic process; GO:0034641 cellular nitrogen compound metabolic process; GO:0042439 ethanol…	GO:0005622 intracellular; GO:0005623 cell; GO:0005737 cytoplasm; GO:0005829 cytosol; GO:0005886 plasma membrane; GO:0016020 membrane; GO:0044424 intracellular part; GO:0044444 cytoplasmic part; GO:0044464 cell part; GO:0071944 cell periphery;		K01590	hdc, HDC; histidine decarboxylase [EC:4.1.1.22]	cann00340 Histidine metabolism; cann01100 Metabolic pathways; cann01110 Biosynthesis of secondary metabolites	PF00282	Pyridoxal-dependent decarboxylase conserved domain
Capana04g001638	"TRL4_ARATH Thioredoxin-like 4, chloroplastic OS=Arabidopsis thaliana GN=At1g07700 PE=2 SV=1"	1.522	Up	0.0032426	At1g07700	24.321	33	98	6	6	215230	232320	267450	244030	252570	287590	374470	366190	347490	339820	325570	353930	293710	294500	278230	283460	284620	287740	323450	337890	326360	293220	312890	311090	chloroplast	GO:0006950 response to stress; GO:0006979 response to oxidative stress; GO:0008152 metabolic process; GO:0009636 response to toxic substance; GO:0009987 cellular process; GO:0019725 cellular homeostasis; GO:0033554 cellular response to stress; GO:0034599 cellular response to oxidative stress; GO:0042221 response to chemical; GO:0042592 homeostatic process; GO:0045454 cell redox homeostasis; GO:00…	GO:0005622 intracellular; GO:0005623 cell; GO:0005737 cytoplasm; GO:0009507 chloroplast; GO:0009532 plastid stroma; GO:0009536 plastid; GO:0009570 chloroplast stroma; GO:0043226 organelle; GO:0043227 membrane-bounded organelle; GO:0043229 intracellular organelle; GO:0043231 intracellular membrane-bounded organelle; GO:0044422 organelle part; GO:0044424 intracellular part; GO:0044434 chloroplast p…	GO:0003824 catalytic activity; GO:0004791 thioredoxin-disulfide reductase activity; GO:0015035 protein disulfide oxidoreductase activity; GO:0015036 disulfide oxidoreductase activity; GO:0016209 antioxidant activity; GO:0016491 oxidoreductase activity; GO:0016651 oxidoreductase activity, acting on NAD(P)H; GO:0016667 oxidoreductase activity, acting on a sulfur group of donors; GO:0016668 oxidored…				PF00085	Thioredoxin
Capana04g001639	NLTP_BOVIN Non-specific lipid-transfer protein OS=Bos taurus GN=SCP2 PE=1 SV=2	1.534	Up	0.0118633	SCP2	13.921	41.3	45	4	4	56661	78196	72763	70627	69332	0	107630	101720	109050	158680	174880	172310	104990	86375	104850	80399	121490	74530	126850	120280	121990	189610	212670	97138	cytoplasm	GO:0006082 organic acid metabolic process; GO:0006629 lipid metabolic process; GO:0006631 fatty acid metabolic process; GO:0007154 cell communication; GO:0007165 signal transduction; GO:0008152 metabolic process; GO:0009987 cellular process; GO:0019752 carboxylic acid metabolic process; GO:0019932 second-messenger-mediated signaling; GO:0019933 cAMP-mediated signaling; GO:0019935 cyclic-nucleotid…	GO:0005622 intracellular; GO:0005623 cell; GO:0005737 cytoplasm; GO:0005777 peroxisome; GO:0042579 microbody; GO:0043226 organelle; GO:0043227 membrane-bounded organelle; GO:0043229 intracellular organelle; GO:0043231 intracellular membrane-bounded organelle; GO:0044424 intracellular part; GO:0044444 cytoplasmic part; GO:0044464 cell part;
Capana04g001645	WEB1_ARATH Protein WEAK CHLOROPLAST MOVEMENT UNDER BLUE LIGHT 1 OS=Arabidopsis thaliana GN=WEB1 PE=1 SV=1	1.561	Up	0.022679	WEB1	104.29	4.4	14	3	3	28843	27819	24872	23785	20531	25936	47166	0	37692	29845	31557	27016	0	23071	0	29531	23747	0	50939	0	31100	0	0	0	nucleus
Capana04g002063	NMCP_ARATH Putative nuclear matrix constituent protein 1-like protein OS=Arabidopsis thaliana GN=At5g65770 PE=2 SV=1	1.627	Up	0.00126031	At5g65770	132.31	18.7	98	16	15	176540	174370	154020	145860	139680	161710	253960	292970	274880	231770	240720	212070	120090	94710	131130	226770	234660	199500	308790	277770	303160	46527	83624	90465	chloroplast	GO:0006996 organelle organization; GO:0006997 nucleus organization; GO:0009987 cellular process; GO:0016043 cellular component organization; GO:0032535 regulation of cellular component size; GO:0065007 biological regulation; GO:0065008 regulation of biological quality; GO:0071840 cellular component organization or biogenesis; GO:0090066 regulation of anatomical structure size; GO:0097298 regulati…	GO:0000229 cytoplasmic chromosome; GO:0000785 chromatin; GO:0000789 cytoplasmic chromatin; GO:0005622 intracellular; GO:0005623 cell; GO:0005634 nucleus; GO:0005635 nuclear envelope; GO:0005652 nuclear lamina; GO:0005654 nucleoplasm; GO:0005694 chromosome; GO:0005737 cytoplasm; GO:0005829 cytosol; GO:0012505 endomembrane system; GO:0031967 organelle envelope; GO:0031974 membrane-enclosed lumen; G…
Capana04g002821	Putative cell wall protein AWA1-like	0.56	Down	0.0050562	---	89.091	16.5	47	6	6	71221	80447	77701	62075	64081	67389	38879	51665	37899	56552	60835	62677	56822	65883	65037	70477	65173	58230	66302	65880	67946	56981	54725	54363	nucleus
Capana04g002900	"G6PDC_TOBAC Glucose-6-phosphate 1-dehydrogenase, chloroplastic OS=Nicotiana tabacum PE=2 SV=1"	0.587	Down	0.00075728	---	67.194	17.4	57	8	6	164020	138070	152900	115120	121370	124980	94027	86902	86072	103930	125340	111470	177570	168310	155590	128390	141680	118040	84247	115520	129260	235470	225060	222760	chloroplast	GO:0005975 carbohydrate metabolic process; GO:0005996 monosaccharide metabolic process; GO:0006006 glucose metabolic process; GO:0006081 cellular aldehyde metabolic process; GO:0006098 pentose-phosphate shunt; GO:0006139 nucleobase-containing compound metabolic process; GO:0006725 cellular aromatic compound metabolic process; GO:0006732 coenzyme metabolic process; GO:0006733 oxidoreduction coenzy…	GO:0005622 intracellular; GO:0005623 cell; GO:0005737 cytoplasm; GO:0009507 chloroplast; GO:0009532 plastid stroma; GO:0009536 plastid; GO:0009570 chloroplast stroma; GO:0043226 organelle; GO:0043227 membrane-bounded organelle; GO:0043229 intracellular organelle; GO:0043231 intracellular membrane-bounded organelle; GO:0044422 organelle part; GO:0044424 intracellular part; GO:0044434 chloroplast p…	GO:0003824 catalytic activity; GO:0004345 glucose-6-phosphate dehydrogenase activity; GO:0016491 oxidoreductase activity; GO:0016614 oxidoreductase activity, acting on CH-OH group of donors; GO:0016616 oxidoreductase activity, acting on the CH-OH group of donors, NAD or NADP as acceptor;	K00036	G6PD, zwf; glucose-6-phosphate 1-dehydrogenase [EC:1.1.1.49 1.1.1.363]	cann00030 Pentose phosphate pathway; cann00480 Glutathione metabolism; cann01100 Metabolic pathways; cann01110 Biosynthesis of secondary metabolites; cann01200 Carbon metabolism	PF00479; PF02781	Glucose-6-phosphate dehydrogenase, NAD binding domain; Glucose-6-phosphate dehydrogenase, C-terminal domain
Capana05g000117	Putative imidazolonepropionase-like	0.551	Down	0.0031362	---	40.485	31.7	159	8	8	674830	636180	564030	620760	586950	634570	392270	299540	342190	625020	622010	636400	424090	419270	445230	439910	389550	386720	362090	320720	327880	844240	951760	916900	extracellular							PF04862	Protein of unknown function, DUF642
Capana05g000203	PHG1B_DICDI Putative phagocytic receptor 1b OS=Dictyostelium discoideum GN=phg1b PE=2 SV=1	0.561	Down	0.0024205	phg1b	67.616	11.5	90	5	4	143450	125840	118210	129770	117580	117270	63714	75049	78417	76499	85735	79012	95880	93208	92698	91239	82878	82352	67521	77698	75218	141990	152230	142630	plasma membrane		GO:0005618 cell wall; GO:0005622 intracellular; GO:0005623 cell; GO:0005737 cytoplasm; GO:0005768 endosome; GO:0005794 Golgi apparatus; GO:0005802 trans-Golgi network; GO:0009505 plant-type cell wall; GO:0012505 endomembrane system; GO:0016020 membrane; GO:0016021 integral component of membrane; GO:0030312 external encapsulating structure; GO:0031224 intrinsic component of membrane; GO:0031410 cy…
Capana05g000541	GYP2_EMENI Putative GTPase-activating protein AN11010 OS=Emericella nidulans (strain FGSC A4 / ATCC 38163 / CBS 112.46 / NRRL 194 / M139) GN=AN11010 PE=4 SV=1	0.643	Down	0.0163414	AN11010	84.009	6.4	22	3	2	46301	46668	49753	40490	36814	38422	27058	34134	0	30439	38432	0	43323	38840	29823	49505	44016	39181	40732	37124	49534	0	0	0	cytoplasm	GO:0006810 transport; GO:0006886 intracellular protein transport; GO:0008104 protein localization; GO:0015031 protein transport; GO:0015833 peptide transport; GO:0031338 regulation of vesicle fusion; GO:0032879 regulation of localization; GO:0033036 macromolecule localization; GO:0033043 regulation of organelle organization; GO:0034613 cellular protein localization; GO:0042886 amide transport; GO…	GO:0005622 intracellular; GO:0005623 cell; GO:0012505 endomembrane system; GO:0044464 cell part;	GO:0005096 GTPase activator activity; GO:0005488 binding; GO:0005515 protein binding; GO:0008047 enzyme activator activity; GO:0017016 Ras GTPase binding; GO:0017137 Rab GTPase binding; GO:0019899 enzyme binding; GO:0030234 enzyme regulator activity; GO:0030695 GTPase regulator activity; GO:0031267 small GTPase binding; GO:0051020 GTPase binding; GO:0060589 nucleoside-triphosphatase regulator act…
Capana05g000657	Y4885_ARATH Probable LRR receptor-like serine/threonine-protein kinase At4g08850 OS=Arabidopsis thaliana GN=At4g08850 PE=1 SV=3	0.646	Down	0.0045381	At4g08850	64.409	20.7	48	9	9	99306	98933	102980	112580	114670	111320	73791	56747	63925	82192	65683	66431	83260	90242	69944	61348	66423	64245	48043	58500	45597	142590	139980	120180	nucleus
Capana05g000665	DFRA_MALDO Bifunctional dihydroflavonol 4-reductase/flavanone 4-reductase OS=Malus domestica GN=DFR PE=1 SV=1	0.391	Down	0.0014635	DFR	37.969	10.6	22	2	2	47851	47742	0	43059	42042	41603	17410	19685	18910	38722	39206	26801	10928	13306	0	12135	0	13035	10694	0	0	16070	0	15626	cytoplasm	GO:0000003 reproduction; GO:0003006 developmental process involved in reproduction; GO:0006725 cellular aromatic compound metabolic process; GO:0007275 multicellular organism development; GO:0008152 metabolic process; GO:0009058 biosynthetic process; GO:0009555 pollen development; GO:0009653 anatomical structure morphogenesis; GO:0009791 post-embryonic development; GO:0009987 cellular process; GO…	GO:0005622 intracellular; GO:0005623 cell; GO:0005737 cytoplasm; GO:0005783 endoplasmic reticulum; GO:0012505 endomembrane system; GO:0043226 organelle; GO:0043227 membrane-bounded organelle; GO:0043229 intracellular organelle; GO:0043231 intracellular membrane-bounded organelle; GO:0044424 intracellular part; GO:0044444 cytoplasmic part; GO:0044464 cell part;
Capana05g000935	HMGYA_SOYBN HMG-Y-related protein A OS=Glycine max PE=2 SV=1	0.557	Down	0.0021968	---	20.984	48.5	113	7	7	599780	515690	496840	525310	463190	530450	263800	313160	319760	580630	526110	532900	486010	482990	517060	576210	557770	421430	779460	644280	640480	276650	465820	346640	nucleus		GO:0005622 intracellular; GO:0005623 cell; GO:0005634 nucleus; GO:0005730 nucleolus; GO:0031974 membrane-enclosed lumen; GO:0031981 nuclear lumen; GO:0043226 organelle; GO:0043227 membrane-bounded organelle; GO:0043228 non-membrane-bounded organelle; GO:0043229 intracellular organelle; GO:0043231 intracellular membrane-bounded organelle; GO:0043232 intracellular non-membrane-bounded organelle; GO…	GO:0003676 nucleic acid binding; GO:0003677 DNA binding; GO:0005488 binding; GO:0097159 organic cyclic compound binding; GO:1901363 heterocyclic compound binding;				PF00538	linker histone H1 and H5 family
Capana05g001026	MBD2_ARATH Methyl-CpG-binding domain-containing protein 2 OS=Arabidopsis thaliana GN=MBD2 PE=1 SV=1	0.575	Down	0.020697	MBD2	32.89	11.3	21	2	2	26115	0	28233	27708	0	25090	16756	14524	0	23764	20851	23569	0	13622	0	23658	18401	0	0	0	0	0	0	17935	nucleus		GO:0005622 intracellular; GO:0005623 cell; GO:0005634 nucleus; GO:0043226 organelle; GO:0043227 membrane-bounded organelle; GO:0043229 intracellular organelle; GO:0043231 intracellular membrane-bounded organelle; GO:0044424 intracellular part; GO:0044464 cell part;	GO:0000166 nucleotide binding; GO:0003676 nucleic acid binding; GO:0003677 DNA binding; GO:0005488 binding; GO:0005515 protein binding; GO:0008327 methyl-CpG binding; GO:0019899 enzyme binding; GO:0036094 small molecule binding; GO:0043565 sequence-specific DNA binding; GO:0097159 organic cyclic compound binding; GO:1901265 nucleoside phosphate binding; GO:1901363 heterocyclic compound binding;				PF07496; PF01429	CW-type Zinc Finger; Methyl-CpG binding domain
Capana05g001225	KC1D_ARATH Casein kinase I isoform delta-like OS=Arabidopsis thaliana GN=At4g26100 PE=2 SV=2	0.607	Down	0.0106365	At4g26100	53.095	18	24	6	5	337630	437040	427230	469600	418340	436030	234950	277680	216430	311920	243090	279550	233410	162780	213830	164710	196650	0	271680	150530	279020	244570	263860	239210	nucleus	GO:0006464 cellular protein modification process; GO:0006468 protein phosphorylation; GO:0006793 phosphorus metabolic process; GO:0006796 phosphate-containing compound metabolic process; GO:0006807 nitrogen compound metabolic process; GO:0006810 transport; GO:0006897 endocytosis; GO:0008152 metabolic process; GO:0008360 regulation of cell shape; GO:0009987 cellular process; GO:0016192 vesicle-med…	GO:0005622 intracellular; GO:0005623 cell; GO:0005634 nucleus; GO:0005737 cytoplasm; GO:0005911 cell-cell junction; GO:0009506 plasmodesma; GO:0030054 cell junction; GO:0043226 organelle; GO:0043227 membrane-bounded organelle; GO:0043229 intracellular organelle; GO:0043231 intracellular membrane-bounded organelle; GO:0044424 intracellular part; GO:0044464 cell part; GO:0055044 symplast;	GO:0003824 catalytic activity; GO:0004672 protein kinase activity; GO:0004674 protein serine/threonine kinase activity; GO:0016301 kinase activity; GO:0016740 transferase activity; GO:0016772 transferase activity, transferring phosphorus-containing groups; GO:0016773 phosphotransferase activity, alcohol group as acceptor;	K02218	CSNK1, CKI; casein kinase 1 [EC:2.7.11.1]		PF00069	Protein kinase domain
Capana05g001473	Aha1_N domain-containing protein	0.438	Down	0.000176111	---	12.351	57.9	48	5	5	169370	176260	169960	148800	148090	149440	79289	79954	66547	148510	109650	158640	140130	93755	127850	139130	115710	128950	98604	97387	116170	152800	185330	156660	mitochondria
Capana05g001492	YTHD2_BOVIN YTH domain family protein 2 OS=Bos taurus GN=YTHDF2 PE=2 SV=1	0.533	Down	0.022262	YTHDF2	37.062	17.3	26	3	3	58841	77820	78302	63823	72083	70807	38155	38129	38326	42104	0	42206	42490	41231	55894	0	0	36945	0	0	28191	46255	51110	56664	chloroplast				K20102	YTHDF; YTH domain-containing family protein		PF04146	YT521-B-like domain
Capana05g002166	GDL2_ARATH GDSL esterase/lipase At1g09390 OS=Arabidopsis thaliana GN=At1g09390 PE=2 SV=1	0.598	Down	0.0064601	At1g09390	41.094	43.5	54	10	9	158920	143150	172150	186260	185610	191570	80682	107860	94719	139130	125660	136140	160370	169790	176450	132910	147610	173630	121930	128760	123730	288830	249510	253490	chloroplast		GO:0005622 intracellular; GO:0005623 cell; GO:0005737 cytoplasm; GO:0009507 chloroplast; GO:0009532 plastid stroma; GO:0009536 plastid; GO:0009570 chloroplast stroma; GO:0043226 organelle; GO:0043227 membrane-bounded organelle; GO:0043229 intracellular organelle; GO:0043231 intracellular membrane-bounded organelle; GO:0044422 organelle part; GO:0044424 intracellular part; GO:0044434 chloroplast p…
Capana05g002420	"DAG_ANTMA DAG protein, chloroplastic OS=Antirrhinum majus GN=DAG PE=2 SV=1"	0.597	Down	0.021702	DAG	26.883	47.5	98	7	5	578270	430210	398030	379670	418720	363220	292800	237550	309440	325970	273940	311380	387400	380860	385440	530710	467520	419270	409280	394490	374690	351480	372130	397200	chloroplast	GO:0000959 mitochondrial RNA metabolic process; GO:0006139 nucleobase-containing compound metabolic process; GO:0006725 cellular aromatic compound metabolic process; GO:0006807 nitrogen compound metabolic process; GO:0008152 metabolic process; GO:0009451 RNA modification; GO:0009987 cellular process; GO:0016070 RNA metabolic process; GO:0016071 mRNA metabolic process; GO:0016556 mRNA modification…	GO:0005622 intracellular; GO:0005623 cell; GO:0005737 cytoplasm; GO:0005739 mitochondrion; GO:0043226 organelle; GO:0043227 membrane-bounded organelle; GO:0043229 intracellular organelle; GO:0043231 intracellular membrane-bounded organelle; GO:0044424 intracellular part; GO:0044444 cytoplasmic part; GO:0044464 cell part;
Capana05g002549	"CB11_SOLLC Chlorophyll a-b binding protein 6A, chloroplastic OS=Solanum lycopersicum GN=CAB6A PE=2 SV=1"	1.592	Up	0.00078499	CAB6A	16.512	21.9	70	3	1	213470	201660	180880	254480	243410	235480	306800	320100	322000	388070	395480	388750	160650	173960	170200	280240	265590	276730	461570	437030	423770	438100	455200	466200	nucleus	GO:0006091 generation of precursor metabolites and energy; GO:0006950 response to stress; GO:0008152 metabolic process; GO:0009266 response to temperature stimulus; GO:0009314 response to radiation; GO:0009409 response to cold; GO:0009416 response to light stimulus; GO:0009628 response to abiotic stimulus; GO:0009637 response to blue light; GO:0009639 response to red or far red light; GO:0009642 …	GO:0005622 intracellular; GO:0005623 cell; GO:0005737 cytoplasm; GO:0009507 chloroplast; GO:0009526 plastid envelope; GO:0009532 plastid stroma; GO:0009534 chloroplast thylakoid; GO:0009535 chloroplast thylakoid membrane; GO:0009536 plastid; GO:0009570 chloroplast stroma; GO:0009579 thylakoid; GO:0009941 chloroplast envelope; GO:0010287 plastoglobule; GO:0016020 membrane; GO:0031967 organelle env…	GO:0005488 binding; GO:0005515 protein binding; GO:0016168 chlorophyll binding; GO:0019904 protein domain specific binding; GO:0031409 pigment binding; GO:0043167 ion binding; GO:0043168 anion binding; GO:0046906 tetrapyrrole binding; GO:0048037 cofactor binding; GO:0097159 organic cyclic compound binding; GO:1901363 heterocyclic compound binding;	K08907	LHCA1; light-harvesting complex I chlorophyll a/b binding protein 1	cann00196 Photosynthesis - antenna proteins; cann01100 Metabolic pathways
Capana06g000045	H2AX_PICAB Histone H2AX OS=Picea abies PE=2 SV=1	0.418	Down	0.0023984	---	15.192	33.8	34	4	2	110950	104840	78759	87198	90709	84828	40506	46329	36461	58139	59827	74294	56327	66221	53674	60563	66471	64231	38117	50247	50333	61498	51701	64059	nucleus				K11251	H2A; histone H2A		PF00125	Core histone H2A/H2B/H3/H4
Capana06g000091	SC24C_ARATH Protein transport protein Sec24-like CEF OS=Arabidopsis thaliana GN=CEF PE=1 SV=3	0.598	Down	0.043621	CEF	69.56	37.1	37	17	3	40881	55512	43123	48800	54642	49262	0	24418	31199	0	0	0	41646	46189	36900	30376	38668	43546	22346	26466	27793	37237	31660	37807	plasma membrane	GO:0006950 response to stress; GO:0006979 response to oxidative stress; GO:0050896 response to stimulus;	GO:0005622 intracellular; GO:0005623 cell; GO:0005737 cytoplasm; GO:0005829 cytosol; GO:0044424 intracellular part; GO:0044444 cytoplasmic part; GO:0044464 cell part;		K14007	SEC24; protein transport protein SEC24	cann04141 Protein processing in endoplasmic reticulum	PF04811; PF08033; PF04815; PF00626	Sec23/Sec24 trunk domain; Sec23/Sec24 beta-sandwich domain; Sec23/Sec24 helical domain; Gelsolin repeat
Capana06g000143	PKHA8_MOUSE Pleckstrin homology domain-containing family A member 8 OS=Mus musculus GN=Plekha8 PE=2 SV=2	0.609	Down	0.00123867	Plekha8	24.984	18.9	43	3	3	62357	56447	66294	73688	67279	59330	36817	40416	35510	49634	47486	45797	57238	47646	51760	48009	64374	52045	36571	31458	33004	63943	46858	55113	nucleus		GO:0005622 intracellular; GO:0005623 cell; GO:0005737 cytoplasm; GO:0005829 cytosol; GO:0005886 plasma membrane; GO:0016020 membrane; GO:0044424 intracellular part; GO:0044444 cytoplasmic part; GO:0044464 cell part; GO:0071944 cell periphery;					PF08718	Glycolipid transfer protein (GLTP)
Capana06g000150	SDD1_ARATH Subtilisin-like protease SDD1 OS=Arabidopsis thaliana GN=SDD1 PE=2 SV=1	0.617	Down	0.044259	SDD1	175.39	7.5	65	5	5	128690	117870	83113	103930	81738	71354	62324	59975	81107	69627	61005	53992	108540	119600	123390	139920	123370	113150	104300	111060	73186	43141	48139	54888	nucleus	GO:0006508 proteolysis; GO:0006807 nitrogen compound metabolic process; GO:0007275 multicellular organism development; GO:0008152 metabolic process; GO:0009653 anatomical structure morphogenesis; GO:0009791 post-embryonic development; GO:0009888 tissue development; GO:0010016 shoot system morphogenesis; GO:0010103 stomatal complex morphogenesis; GO:0010374 stomatal complex development; GO:0019538…	GO:0005623 cell; GO:0005886 plasma membrane; GO:0009897 external side of plasma membrane; GO:0009986 cell surface; GO:0016020 membrane; GO:0044425 membrane part; GO:0044459 plasma membrane part; GO:0044464 cell part; GO:0071944 cell periphery; GO:0098552 side of membrane;	GO:0003824 catalytic activity; GO:0004175 endopeptidase activity; GO:0004252 serine-type endopeptidase activity; GO:0008233 peptidase activity; GO:0008236 serine-type peptidase activity; GO:0016787 hydrolase activity; GO:0017171 serine hydrolase activity; GO:0070011 peptidase activity, acting on L-amino acid peptides;				PF03456; PF05922; PF00082	uDENN domain; Peptidase inhibitor I9; Subtilase family
Capana06g000168	CI023_HUMAN Alba-like protein C9orf23 OS=Homo sapiens GN=C9orf23 PE=1 SV=1	0.486	Down	0.0002558	C9orf23	29.1	31	64	4	4	209510	193550	197530	247640	245540	238030	89567	94455	107410	129600	128750	138650	150370	157980	160760	164520	147960	128630	65873	81390	80009	204430	189420	208860	cytoplasm
Capana06g000224	CBP1_ORYSJ Serine carboxypeptidase 1 OS=Oryza sativa subsp. japonica GN=CBP1 PE=2 SV=1	0.616	Down	0.0195175	CBP1	77.706	15.5	23	6	3	185310	156710	147910	189180	176860	164840	101930	98852	100900	203380	206310	192580	0	0	0	0	0	0	0	0	0	0	0	0	nucleus				K16296	SCPL-I; serine carboxypeptidase-like clade I [EC:3.4.16.-]		PF00450	Serine carboxypeptidase
Capana06g000232	"PSAL_ARATH Photosystem I reaction center subunit XI, chloroplastic OS=Arabidopsis thaliana GN=PSAL PE=1 SV=2"	1.626	Up	9.5825e-05	PSAL	23.12	27.3	111	7	7	1341200	1380300	1452500	1770100	1750800	1882300	2350600	2228100	2205900	2208200	2118800	2275500	1472700	1444700	1418100	1661900	1616800	1541100	2071300	2096700	2145400	2864900	3251500	3190900	chloroplast		GO:0005622 intracellular; GO:0005623 cell; GO:0005737 cytoplasm; GO:0009507 chloroplast; GO:0009526 plastid envelope; GO:0009532 plastid stroma; GO:0009534 chloroplast thylakoid; GO:0009535 chloroplast thylakoid membrane; GO:0009536 plastid; GO:0009570 chloroplast stroma; GO:0009579 thylakoid; GO:0009941 chloroplast envelope; GO:0010287 plastoglobule; GO:0016020 membrane; GO:0031967 organelle env…	GO:0005488 binding; GO:0005515 protein binding; GO:0019904 protein domain specific binding;	K02699	psaL; photosystem I subunit XI	cann00195 Photosynthesis
Capana06g000273	TCMO_SOYBN Trans-cinnamate 4-monooxygenase OS=Glycine max GN=CYP73A11 PE=2 SV=1	0.571	Down	0.0057814	CYP73A11	58.046	25.9	77	10	10	225380	247640	234040	254680	263940	259400	117610	163090	123080	147290	111080	142240	169790	167790	177840	198380	204400	174180	157520	158800	146540	173670	166750	190630	cytoplasm	GO:0006725 cellular aromatic compound metabolic process; GO:0006732 coenzyme metabolic process; GO:0006733 oxidoreduction coenzyme metabolic process; GO:0006743 ubiquinone metabolic process; GO:0006744 ubiquinone biosynthetic process; GO:0007275 multicellular organism development; GO:0008152 metabolic process; GO:0009058 biosynthetic process; GO:0009108 coenzyme biosynthetic process; GO:0009555 p…	GO:0005618 cell wall; GO:0005622 intracellular; GO:0005623 cell; GO:0005737 cytoplasm; GO:0005773 vacuole; GO:0005774 vacuolar membrane; GO:0005783 endoplasmic reticulum; GO:0005794 Golgi apparatus; GO:0005886 plasma membrane; GO:0005911 cell-cell junction; GO:0009505 plant-type cell wall; GO:0009506 plasmodesma; GO:0012505 endomembrane system; GO:0016020 membrane; GO:0030054 cell junction; GO:00…	GO:0003824 catalytic activity; GO:0004497 monooxygenase activity; GO:0005488 binding; GO:0005515 protein binding; GO:0016491 oxidoreductase activity; GO:0016705 oxidoreductase activity, acting on paired donors, with incorporation or reduction of molecular oxygen; GO:0016709 oxidoreductase activity, acting on paired donors, with incorporation or reduction of molecular oxygen, NAD(P)H as one donor,…				PF00067	Cytochrome P450
Capana06g000311	RU2B_MOUSE U2 small nuclear ribonucleoprotein B'' OS=Mus musculus GN=Snrpb2 PE=2 SV=1	0.655	Down	0.0112426	Snrpb2	24.457	20.1	52	4	4	96869	113480	114880	114870	131540	118260	79067	60709	73270	84785	93844	104660	111240	102290	106440	95741	85670	86557	63827	65575	69801	123910	126610	119750	chloroplast	GO:0000245 spliceosomal complex assembly; GO:0000354 cis assembly of pre-catalytic spliceosome; GO:0000375 RNA splicing, via transesterification reactions; GO:0000377 RNA splicing, via transesterification reactions with bulged adenosine as nucleophile; GO:0000398 mRNA splicing, via spliceosome; GO:0006139 nucleobase-containing compound metabolic process; GO:0006396 RNA processing; GO:0006397 mRNA…	GO:0001650 fibrillar center; GO:0005622 intracellular; GO:0005623 cell; GO:0005634 nucleus; GO:0005654 nucleoplasm; GO:0005681 spliceosomal complex; GO:0005684 U2-type spliceosomal complex; GO:0005685 U1 snRNP; GO:0005686 U2 snRNP; GO:0005730 nucleolus; GO:0005737 cytoplasm; GO:0015030 Cajal body; GO:0016604 nuclear body; GO:0016607 nuclear speck; GO:0030532 small nuclear ribonucleoprotein comple…	GO:0003676 nucleic acid binding; GO:0003723 RNA binding; GO:0005488 binding; GO:0017069 snRNA binding; GO:0030619 U1 snRNA binding; GO:0035613 RNA stem-loop binding; GO:0035614 snRNA stem-loop binding; GO:0097159 organic cyclic compound binding; GO:1901363 heterocyclic compound binding;	K11094	SNRPB2; U2 small nuclear ribonucleoprotein B''	cann03040 Spliceosome	PF00076	RNA recognition motif. (a.k.a. RRM, RBD, or RNP domain)
Capana06g000337	U520_HUMAN U5 small nuclear ribonucleoprotein 200 kDa helicase OS=Homo sapiens GN=SNRNP200 PE=1 SV=2	3.57	Up	1.3905e-06	SNRNP200	245.63	19.9	183	28	28	197560	202190	191350	173720	167910	167160	686400	744960	679250	294020	310300	278110	260300	276460	263220	502270	501400	485490	836140	731180	783670	79132	75823	105660	cytoplasm	GO:0000245 spliceosomal complex assembly; GO:0000354 cis assembly of pre-catalytic spliceosome; GO:0000375 RNA splicing, via transesterification reactions; GO:0000377 RNA splicing, via transesterification reactions with bulged adenosine as nucleophile; GO:0000398 mRNA splicing, via spliceosome; GO:0006139 nucleobase-containing compound metabolic process; GO:0006396 RNA processing; GO:0006397 mRNA…	GO:0005622 intracellular; GO:0005623 cell; GO:0005634 nucleus; GO:0005654 nucleoplasm; GO:0005681 spliceosomal complex; GO:0005682 U5 snRNP; GO:0005911 cell-cell junction; GO:0009506 plasmodesma; GO:0030054 cell junction; GO:0030532 small nuclear ribonucleoprotein complex; GO:0031974 membrane-enclosed lumen; GO:0031981 nuclear lumen; GO:0032991 macromolecular complex; GO:0043226 organelle; GO:004…	GO:0003724 RNA helicase activity; GO:0003824 catalytic activity; GO:0004004 ATP-dependent RNA helicase activity; GO:0004386 helicase activity; GO:0005488 binding; GO:0005515 protein binding; GO:0008026 ATP-dependent helicase activity; GO:0008186 RNA-dependent ATPase activity; GO:0016462 pyrophosphatase activity; GO:0016787 hydrolase activity; GO:0016817 hydrolase activity, acting on acid anhydrid…	K12854	SNRNP200, BRR2; pre-mRNA-splicing helicase BRR2 [EC:3.6.4.13]	cann03040 Spliceosome	PF00270	DEAD/DEAH box helicase
Capana06g000379	TBB1_MAIZE Tubulin beta-1 chain OS=Zea mays GN=TUBB1 PE=2 SV=1	0.594	Down	2.2742e-05	TUBB1	50.186	71.1	77	24	4	536070	525580	521220	544210	532280	537550	307810	304460	327170	297690	308940	300750	503580	456930	494900	524440	549160	503310	563570	541210	513600	152840	228800	159680	nucleus		GO:0005622 intracellular; GO:0005623 cell; GO:0005856 cytoskeleton; GO:0043226 organelle; GO:0043228 non-membrane-bounded organelle; GO:0043229 intracellular organelle; GO:0043232 intracellular non-membrane-bounded organelle; GO:0044424 intracellular part; GO:0044464 cell part;		K07375	TUBB; tubulin beta	cann04145 Phagosome	PF00091; PF03953	Tubulin/FtsZ family, GTPase domain; Tubulin C-terminal domain
Capana06g000395	PP12_TOBAC Serine/threonine-protein phosphatase PP1 isozyme 2 OS=Nicotiana tabacum GN=NPP2 PE=2 SV=1	0.561	Down	0.0069991	NPP2	35.449	46.5	61	9	3	122700	111380	91003	108410	112590	98973	57245	55557	69593	84461	84846	77846	84306	72928	82453	94086	90755	80445	85079	69553	70659	93363	112610	120660	cytoplasm	GO:0006464 cellular protein modification process; GO:0006470 protein dephosphorylation; GO:0006793 phosphorus metabolic process; GO:0006796 phosphate-containing compound metabolic process; GO:0006807 nitrogen compound metabolic process; GO:0008152 metabolic process; GO:0009987 cellular process; GO:0016311 dephosphorylation; GO:0019538 protein metabolic process; GO:0036211 protein modification pro…	GO:0000164 protein phosphatase type 1 complex; GO:0005622 intracellular; GO:0005623 cell; GO:0005737 cytoplasm; GO:0008287 protein serine/threonine phosphatase complex; GO:0032991 macromolecular complex; GO:0044424 intracellular part; GO:0044444 cytoplasmic part; GO:0044464 cell part; GO:1902494 catalytic complex; GO:1903293 phosphatase complex;	GO:0003824 catalytic activity; GO:0004721 phosphoprotein phosphatase activity; GO:0004722 protein serine/threonine phosphatase activity; GO:0016787 hydrolase activity; GO:0016788 hydrolase activity, acting on ester bonds; GO:0016791 phosphatase activity; GO:0042578 phosphoric ester hydrolase activity;	K06269	PPP1C; serine/threonine-protein phosphatase PP1 catalytic subunit [EC:3.1.3.16]	cann03015 mRNA surveillance pathway	PF00149	Calcineurin-like phosphoesterase
Capana06g000463	C93B1_GLYEC Licodione synthase OS=Glycyrrhiza echinata GN=CYP93B1 PE=1 SV=2	0.54	Down	0.0003244	CYP93B1	58.916	12.1	54	5	5	161560	149780	148830	189390	187920	176360	76272	82632	89739	87600	89799	104060	130380	137590	131070	198630	199700	188440	170650	152520	162980	237940	242660	246470	chloroplast							PF00067	Cytochrome P450
Capana06g000554	CBP3_ORYSJ Serine carboxypeptidase 3 OS=Oryza sativa subsp. japonica GN=CBP3 PE=2 SV=1	0.418	Down	0.032822	CBP3	51.863	24.8	43	7	4	113010	59004	91264	57379	75892	74587	41964	24078	44051	29588	40138	29413	112640	46496	87828	82927	34879	48376	88339	73794	50736	164500	145090	185080	chloroplast	GO:0006508 proteolysis; GO:0006807 nitrogen compound metabolic process; GO:0008152 metabolic process; GO:0009056 catabolic process; GO:0009057 macromolecule catabolic process; GO:0009987 cellular process; GO:0019538 protein metabolic process; GO:0030163 protein catabolic process; GO:0043170 macromolecule metabolic process; GO:0044237 cellular metabolic process; GO:0044238 primary metabolic proces…	GO:0005576 extracellular region; GO:0005622 intracellular; GO:0005623 cell; GO:0005737 cytoplasm; GO:0005773 vacuole; GO:0005777 peroxisome; GO:0005783 endoplasmic reticulum; GO:0005789 endoplasmic reticulum membrane; GO:0012505 endomembrane system; GO:0016020 membrane; GO:0031984 organelle subcompartment; GO:0042175 nuclear outer membrane-endoplasmic reticulum membrane network; GO:0042579 microb…	GO:0003824 catalytic activity; GO:0004180 carboxypeptidase activity; GO:0004185 serine-type carboxypeptidase activity; GO:0008233 peptidase activity; GO:0008236 serine-type peptidase activity; GO:0008238 exopeptidase activity; GO:0016787 hydrolase activity; GO:0017171 serine hydrolase activity; GO:0070008 serine-type exopeptidase activity; GO:0070011 peptidase activity, acting on L-amino acid pep…	K16298	SCPL-IV; serine carboxypeptidase-like clade IV [EC:3.4.16.-]		PF00450	Serine carboxypeptidase
Capana06g000572	AGO5_ARATH Protein argonaute 5 OS=Arabidopsis thaliana GN=AGO5 PE=1 SV=2	0.579	Down	0.0025372	AGO5	107.18	12.6	58	7	7	96232	109150	89647	87713	93309	88703	52841	63564	54521	97012	88154	106060	74010	67194	75649	77522	53946	75094	65039	70142	77892	27573	0	23546	nucleus	GO:0000003 reproduction; GO:0000280 nuclear division; GO:0006325 chromatin organization; GO:0006464 cellular protein modification process; GO:0006482 protein demethylation; GO:0006807 nitrogen compound metabolic process; GO:0006996 organelle organization; GO:0007049 cell cycle; GO:0007140 male meiosis; GO:0007143 female meiotic division; GO:0007275 multicellular organism development; GO:0007276 g…	GO:0000228 nuclear chromosome; GO:0000785 chromatin; GO:0000790 nuclear chromatin; GO:0005622 intracellular; GO:0005623 cell; GO:0005634 nucleus; GO:0005694 chromosome; GO:0005730 nucleolus; GO:0005731 nucleolus organizer region; GO:0030874 nucleolar chromatin; GO:0031974 membrane-enclosed lumen; GO:0031981 nuclear lumen; GO:0032991 macromolecular complex; GO:0043226 organelle; GO:0043227 membran…	GO:0003676 nucleic acid binding; GO:0003723 RNA binding; GO:0005488 binding; GO:0035197 siRNA binding; GO:0097159 organic cyclic compound binding; GO:1901363 heterocyclic compound binding;	K11593	ELF2C, AGO; eukaryotic translation initiation factor 2C		PF08699; PF02170	Domain of unknown function (DUF1785); PAZ domain
Capana06g000595	FACR3_ARATH Fatty acyl-CoA reductase 3 OS=Arabidopsis thaliana GN=FAR3 PE=2 SV=1	0.664	Down	0.0127618	FAR3	55.73	20.2	79	7	7	127120	118100	96053	103820	97381	91178	81477	70341	75037	60417	46019	61697	111550	109560	107630	132350	142580	129410	100590	93424	100630	92430	93006	93317	chloroplast	GO:0006139 nucleobase-containing compound metabolic process; GO:0006163 purine nucleotide metabolic process; GO:0006637 acyl-CoA metabolic process; GO:0006725 cellular aromatic compound metabolic process; GO:0006732 coenzyme metabolic process; GO:0006753 nucleoside phosphate metabolic process; GO:0006790 sulfur compound metabolic process; GO:0006793 phosphorus metabolic process; GO:0006796 phosph…	GO:0005622 intracellular; GO:0005623 cell; GO:0005737 cytoplasm; GO:0005783 endoplasmic reticulum; GO:0012505 endomembrane system; GO:0043226 organelle; GO:0043227 membrane-bounded organelle; GO:0043229 intracellular organelle; GO:0043231 intracellular membrane-bounded organelle; GO:0044424 intracellular part; GO:0044444 cytoplasmic part; GO:0044464 cell part;	GO:0003824 catalytic activity; GO:0016491 oxidoreductase activity; GO:0016620 oxidoreductase activity, acting on the aldehyde or oxo group of donors, NAD or NADP as acceptor; GO:0016903 oxidoreductase activity, acting on the aldehyde or oxo group of donors; GO:0080019 fatty-acyl-CoA reductase (alcohol-forming) activity;	K13356	FAR; alcohol-forming fatty acyl-CoA reductase [EC:1.2.1.84]	cann00073 Cutin, suberine and wax biosynthesis; cann04146 Peroxisome
Capana06g000630	R3H and coiled-coil domain-containing protein 1 isoform X2	0.527	Down	0.0183421	---	33.02	14.8	11	2	2	28571	25340	0	0	0	0	13273	0	15110	0	30628	0	0	22232	0	0	22070	30049	24518	15777	24306	0	0	0	nucleus
Capana06g000681	GLUA_DICDI Lysosomal beta glucosidase OS=Dictyostelium discoideum GN=gluA PE=1 SV=2	0.484	Down	0.00076175	gluA	62.528	19.1	38	6	5	130960	145660	156630	142200	172530	190780	67478	78082	64076	123620	116140	43059	159690	150780	156510	127240	133340	98010	119240	131630	101070	100650	102440	107060	plasma membrane				K05349	bglX; beta-glucosidase [EC:3.2.1.21]	cann00460 Cyanoamino acid metabolism; cann00500 Starch and sucrose metabolism; cann00940 Phenylpropanoid biosynthesis; cann01100 Metabolic pathways; cann01110 Biosynthesis of secondary metabolites	PF00933; PF01915	Glycosyl hydrolase family 3 N terminal domain; Glycosyl hydrolase family 3 C-terminal domain
Capana06g000707	BIOB_ARATH Biotin synthase OS=Arabidopsis thaliana GN=BIO2 PE=2 SV=1	0.516	Down	0.0098043	BIO2	41.321	14.3	25	3	3	67338	67934	90695	84840	73069	81550	31498	44707	40485	90589	41122	42775	39247	75824	0	75052	65736	67730	0	59278	59450	56417	67563	71556	mitochondria			GO:0005488 binding; GO:0008270 zinc ion binding; GO:0043167 ion binding; GO:0043169 cation binding; GO:0046872 metal ion binding; GO:0046914 transition metal ion binding;	K01012	bioB; biotin synthase [EC:2.8.1.6]	cann00780 Biotin metabolism; cann01100 Metabolic pathways	PF04055; PF06968	Radical SAM superfamily; Biotin and Thiamin Synthesis associated domain
Capana06g000836	RUXE_PIG Small nuclear ribonucleoprotein E OS=Sus scrofa GN=SNRPE PE=3 SV=1	0.637	Down	0.025164	SNRPE	55.711	4.1	39	2	2	66126	0	82264	91306	95589	106880	51415	47724	42706	59336	56091	59371	83153	87897	80875	58549	67295	68481	50806	46205	58398	139610	126570	121200	chloroplast							PF01423	LSM domain
Capana06g001083	4CL2_TOBAC 4-coumarate--CoA ligase 2 OS=Nicotiana tabacum GN=4CL2 PE=2 SV=1	0.432	Down	0.0057034	4CL2	58.558	13.5	30	5	4	118900	111960	78641	71054	106570	121160	37391	47573	48640	45051	42000	43434	53892	64292	51894	58997	54874	65455	58054	49869	53382	95688	77473	89650	chloroplast	GO:0006725 cellular aromatic compound metabolic process; GO:0008152 metabolic process; GO:0009058 biosynthetic process; GO:0009698 phenylpropanoid metabolic process; GO:0009699 phenylpropanoid biosynthetic process; GO:0009987 cellular process; GO:0019438 aromatic compound biosynthetic process; GO:0019748 secondary metabolic process; GO:0044237 cellular metabolic process; GO:0044249 cellular biosy…	GO:0005622 intracellular; GO:0005623 cell; GO:0005737 cytoplasm; GO:0044424 intracellular part; GO:0044464 cell part;	GO:0003824 catalytic activity; GO:0016207 4-coumarate-CoA ligase activity; GO:0016405 CoA-ligase activity; GO:0016874 ligase activity; GO:0016877 ligase activity, forming carbon-sulfur bonds; GO:0016878 acid-thiol ligase activity;	K01904	4CL; 4-coumarate--CoA ligase [EC:6.2.1.12]	cann00130 Ubiquinone and other terpenoid-quinone biosynthesis; cann00940 Phenylpropanoid biosynthesis; cann00999 Biosynthesis of secondary metabolites - unclassified; cann01100 Metabolic pathways; cann01110 Biosynthesis of secondary metabolites	PF13193	Domain of unknown function (DUF4009)
Capana06g001129	K0664_ANOGA Protein KIAA0664 homolog OS=Anopheles gambiae GN=AGAP011851 PE=3 SV=4	0.617	Down	0.00172386	AGAP011851	174.34	24.1	178	25	22	596640	560020	656360	479030	457300	526600	369330	404320	346030	124070	148530	135620	474150	573950	494470	567350	545270	498480	467130	410180	476930	26480	71189	47975	chloroplast				K03255	TIF31, CLU1; protein TIF31
Capana06g001173	TIAR_HUMAN Nucleolysin TIAR OS=Homo sapiens GN=TIAL1 PE=1 SV=1	0.631	Down	0.00095963	TIAL1	41.892	34.8	101	7	5	342590	360600	328610	390510	364740	352510	199690	218100	233650	250320	237630	205220	291770	294530	285660	293750	277550	290100	248430	222320	237740	382630	361130	385320	nucleus	GO:0006355 regulation of transcription, DNA-templated; GO:0006357 regulation of transcription from RNA polymerase II promoter; GO:0006915 apoptotic process; GO:0006950 response to stress; GO:0006952 defense response; GO:0007154 cell communication; GO:0007165 signal transduction; GO:0007166 cell surface receptor signaling pathway; GO:0007167 enzyme linked receptor protein signaling pathway; GO:000…	GO:0000323 lytic vacuole; GO:0005622 intracellular; GO:0005623 cell; GO:0005634 nucleus; GO:0005654 nucleoplasm; GO:0005737 cytoplasm; GO:0005764 lysosome; GO:0005773 vacuole; GO:0010494 cytoplasmic stress granule; GO:0031974 membrane-enclosed lumen; GO:0031981 nuclear lumen; GO:0032991 macromolecular complex; GO:0035770 ribonucleoprotein granule; GO:0036464 cytoplasmic ribonucleoprotein granule;…	GO:0003676 nucleic acid binding; GO:0003723 RNA binding; GO:0003729 mRNA binding; GO:0005488 binding; GO:0097159 organic cyclic compound binding; GO:1901363 heterocyclic compound binding;	K13201	TIA1, TIAL1; nucleolysin TIA-1/TIAR		PF00076	RNA recognition motif. (a.k.a. RRM, RBD, or RNP domain)
Capana06g001228	Y5241_ARATH Probable receptor-like protein kinase At5g24010 OS=Arabidopsis thaliana GN=At5g24010 PE=1 SV=1	0.649	Down	0.03178	At5g24010	92.034	7.4	11	4	4	47299	57860	44022	45194	42156	52313	25852	36521	34461	0	26621	0	31648	0	19885	29891	30624	26486	27394	0	0	0	0	0	chloroplast							PF12819; PF07714	Carbohydrate-binding protein of the ER; Protein tyrosine kinase
Capana06g001249	PPA1_SOLLC Acid phosphatase 1 OS=Solanum lycopersicum GN=APS1 PE=2 SV=1	0.41	Down	0.00031959	APS1	29.735	39.5	62	8	8	142180	151260	126310	194120	243720	256260	52064	63390	56473	206300	129510	160280	209530	173540	220260	226450	220910	204760	182030	190700	172290	1170300	1105000	1016600	vacuolar membrane	GO:0001101 response to acid chemical; GO:0002213 defense response to insect; GO:0006793 phosphorus metabolic process; GO:0006796 phosphate-containing compound metabolic process; GO:0006950 response to stress; GO:0006952 defense response; GO:0006979 response to oxidative stress; GO:0008152 metabolic process; GO:0009605 response to external stimulus; GO:0009607 response to biotic stimulus; GO:00096…	GO:0005622 intracellular; GO:0005623 cell; GO:0005737 cytoplasm; GO:0005773 vacuole; GO:0005829 cytosol; GO:0005840 ribosome; GO:0022626 cytosolic ribosome; GO:0032991 macromolecular complex; GO:0043226 organelle; GO:0043227 membrane-bounded organelle; GO:0043228 non-membrane-bounded organelle; GO:0043229 intracellular organelle; GO:0043231 intracellular membrane-bounded organelle; GO:0043232 int…	GO:0003824 catalytic activity; GO:0003993 acid phosphatase activity; GO:0005488 binding; GO:0005515 protein binding; GO:0008134 transcription factor binding; GO:0016787 hydrolase activity; GO:0016788 hydrolase activity, acting on ester bonds; GO:0016791 phosphatase activity; GO:0042578 phosphoric ester hydrolase activity;
Capana06g001364	Putative alkaline/neutral invertase B	0.349	Down	0.0035401	---	62.981	26.1	40	9	8	157590	104340	131390	122340	132210	90409	35688	54098	47417	92160	66997	79807	86653	76653	124790	96979	147440	76595	102000	84110	74574	109380	83250	126240	cytoplasm	GO:0000302 response to reactive oxygen species; GO:0005975 carbohydrate metabolic process; GO:0005984 disaccharide metabolic process; GO:0005985 sucrose metabolic process; GO:0005987 sucrose catabolic process; GO:0006082 organic acid metabolic process; GO:0006520 cellular amino acid metabolic process; GO:0006807 nitrogen compound metabolic process; GO:0006950 response to stress; GO:0006979 respon…	GO:0005622 intracellular; GO:0005623 cell; GO:0005634 nucleus; GO:0005737 cytoplasm; GO:0005829 cytosol; GO:0005886 plasma membrane; GO:0016020 membrane; GO:0043226 organelle; GO:0043227 membrane-bounded organelle; GO:0043229 intracellular organelle; GO:0043231 intracellular membrane-bounded organelle; GO:0044424 intracellular part; GO:0044444 cytoplasmic part; GO:0044464 cell part; GO:0071944 ce…	GO:0003824 catalytic activity; GO:0004553 hydrolase activity, hydrolyzing O-glycosyl compounds; GO:0004564 beta-fructofuranosidase activity; GO:0004575 sucrose alpha-glucosidase activity; GO:0015926 glucosidase activity; GO:0016787 hydrolase activity; GO:0016798 hydrolase activity, acting on glycosyl bonds; GO:0090599 alpha-glucosidase activity;				PF12899	Alkaline and neutral invertase
Capana06g001466	protein WVD2-like 6 isoform X1	0.651	Down	0.00148124	---	48.678	15	43	5	5	129930	119210	109770	117760	117630	112720	81253	74170	78159	134850	141770	128800	118090	127570	130430	127140	128550	125230	113530	111340	118430	109380	103090	133000	nucleus	GO:0009719 response to endogenous stimulus; GO:0009723 response to ethylene; GO:0009725 response to hormone; GO:0009987 cellular process; GO:0010033 response to organic substance; GO:0032870 cellular response to hormone stimulus; GO:0042221 response to chemical; GO:0050896 response to stimulus; GO:0051716 cellular response to stimulus; GO:0070887 cellular response to chemical stimulus; GO:0071310…		GO:0005488 binding; GO:0005515 protein binding; GO:0008017 microtubule binding; GO:0008092 cytoskeletal protein binding; GO:0015631 tubulin binding;
Capana06g001655	protein ovo-like	0.526	Down	0.0069421	---	44.652	24.8	12	4	4	53854	61629	57073	79065	55744	36919	0	26878	33610	38752	35722	45100	50705	55776	36714	65212	77298	26148	56263	93216	66312	25366	27586	28686	chloroplast							PF12874	Zinc-finger of C2H2 type
Capana06g001748	RFC5_HUMAN Replication factor C subunit 5 OS=Homo sapiens GN=RFC5 PE=1 SV=1	0.628	Down	0.00034065	RFC5	39.86	36.9	84	8	8	168560	156830	147600	160970	160020	169730	101830	97310	98067	120810	112910	104550	126360	129510	122210	123750	120930	119580	102320	98706	108360	116020	125400	138090	cytoplasm	GO:0006139 nucleobase-containing compound metabolic process; GO:0006259 DNA metabolic process; GO:0006260 DNA replication; GO:0006261 DNA-dependent DNA replication; GO:0006275 regulation of DNA replication; GO:0006281 DNA repair; GO:0006725 cellular aromatic compound metabolic process; GO:0006807 nitrogen compound metabolic process; GO:0006950 response to stress; GO:0006974 cellular response to D…	GO:0005622 intracellular; GO:0005623 cell; GO:0005634 nucleus; GO:0005657 replication fork; GO:0005663 DNA replication factor C complex; GO:0005694 chromosome; GO:0031390 Ctf18 RFC-like complex; GO:0032991 macromolecular complex; GO:0043226 organelle; GO:0043227 membrane-bounded organelle; GO:0043228 non-membrane-bounded organelle; GO:0043229 intracellular organelle; GO:0043231 intracellular memb…	GO:0005488 binding; GO:0005515 protein binding; GO:0019899 enzyme binding;	K10756	RFC3_5; replication factor C subunit 3/5	cann03030 DNA replication; cann03420 Nucleotide excision repair; cann03430 Mismatch repair	PF00004; PF08542	ATPase family associated with various cellular activities (AAA); Replication factor C C-terminal domain
Capana06g001920	SURE_GEOSF 5'-nucleotidase surE OS=Geobacter sp. (strain FRC-32) GN=surE PE=3 SV=1	0.602	Down	0.021618	surE	24.326	29.1	85	4	4	106560	97027	97461	105570	107580	99150	78221	52924	49990	83831	65673	70286	130770	152250	150060	174550	156460	169390	123920	126880	120180	212820	204380	203650	chloroplast				K03787	surE; 5'-nucleotidase [EC:3.1.3.5]	cann00230 Purine metabolism; cann00240 Pyrimidine metabolism; cann00760 Nicotinate and nicotinamide metabolism; cann01100 Metabolic pathways; cann01110 Biosynthesis of secondary metabolites
Capana06g002156	RLMN_ACAM1 Ribosomal RNA large subunit methyltransferase N OS=Acaryochloris marina (strain MBIC 11017) GN=rlmN PE=3 SV=1	0.385	Down	0.00122064	rlmN	45.267	14.9	32	4	4	74598	102020	87278	74116	81156	80073	29274	34635	37646	37725	36992	0	58353	50657	53605	59206	58528	62475	49582	41943	43470	33668	0	45490	chloroplast				K06941	rlmN; 23S rRNA (adenine2503-C2)-methyltransferase [EC:2.1.1.192]		PF04055; PF13394	Radical SAM superfamily; 4Fe-4S single cluster domain
Capana06g002170	protein INVOLVED IN DE NOVO 2	0.65	Down	0.004237	---	66.972	13	37	5	5	52864	57912	56508	53828	50733	40469	36211	31949	40567	60905	56057	43977	39414	64667	47115	48901	57971	58264	66991	82347	81247	23542	25868	24117	nucleus	GO:0000018 regulation of DNA recombination; GO:0006139 nucleobase-containing compound metabolic process; GO:0006259 DNA metabolic process; GO:0006282 regulation of DNA repair; GO:0006304 DNA modification; GO:0006305 DNA alkylation; GO:0006306 DNA methylation; GO:0006325 chromatin organization; GO:0006342 chromatin silencing; GO:0006355 regulation of transcription, DNA-templated; GO:0006725 cellul…	GO:0005622 intracellular; GO:0005623 cell; GO:0005634 nucleus; GO:0005655 nucleolar ribonuclease P complex; GO:0005730 nucleolus; GO:0030677 ribonuclease P complex; GO:0030681 multimeric ribonuclease P complex; GO:0031974 membrane-enclosed lumen; GO:0031981 nuclear lumen; GO:0032991 macromolecular complex; GO:0043226 organelle; GO:0043227 membrane-bounded organelle; GO:0043228 non-membrane-bounde…					PF03470; PF03468; PF03469	XS zinc finger domain; XS domain; XH domain
Capana06g002292	"FAD3C_SESIN Omega-3 fatty acid desaturase, chloroplastic OS=Sesamum indicum GN=FAD7 PE=2 SV=1"	0.368	Down	0.00105595	FAD7	50.09	23.8	94	6	6	485310	413450	408350	331480	336340	295900	128930	181430	170230	106460	107160	137060	481040	416990	435410	404870	329260	322540	189460	244890	256220	409880	411590	395190	chloroplast	GO:0006082 organic acid metabolic process; GO:0006629 lipid metabolic process; GO:0006631 fatty acid metabolic process; GO:0006633 fatty acid biosynthetic process; GO:0006950 response to stress; GO:0008152 metabolic process; GO:0008610 lipid biosynthetic process; GO:0009058 biosynthetic process; GO:0009266 response to temperature stimulus; GO:0009409 response to cold; GO:0009628 response to abiot…	GO:0005622 intracellular; GO:0005623 cell; GO:0005737 cytoplasm; GO:0009507 chloroplast; GO:0009526 plastid envelope; GO:0009536 plastid; GO:0009941 chloroplast envelope; GO:0016020 membrane; GO:0031090 organelle membrane; GO:0031967 organelle envelope; GO:0031975 envelope; GO:0042170 plastid membrane; GO:0043226 organelle; GO:0043227 membrane-bounded organelle; GO:0043229 intracellular organelle…	GO:0003824 catalytic activity; GO:0016491 oxidoreductase activity; GO:0016705 oxidoreductase activity, acting on paired donors, with incorporation or reduction of molecular oxygen; GO:0042389 omega-3 fatty acid desaturase activity;	K10257	FAD3, FAD7, FAD8, desB; acyl-lipid omega-3 desaturase [EC:1.14.19.25 1.14.19.35 1.14.19.36]		PF00487	Fatty acid desaturase
Capana06g002990	PPR28_ARATH Pentatricopeptide repeat-containing protein At1g09900 OS=Arabidopsis thaliana GN=At1g09900 PE=2 SV=1	0.598	Down	0.00095636	At1g09900	101.7	9.8	38	6	6	369880	348260	341700	341270	342020	310880	204890	194880	233600	173060	190440	132050	341200	363330	321410	313780	270310	260360	266410	245270	274240	182440	314530	237950	nucleus	GO:0006139 nucleobase-containing compound metabolic process; GO:0006725 cellular aromatic compound metabolic process; GO:0006807 nitrogen compound metabolic process; GO:0008152 metabolic process; GO:0009451 RNA modification; GO:0009987 cellular process; GO:0016070 RNA metabolic process; GO:0034641 cellular nitrogen compound metabolic process; GO:0043170 macromolecule metabolic process; GO:0043412…	GO:0005622 intracellular; GO:0005623 cell; GO:0016020 membrane; GO:0043226 organelle; GO:0043227 membrane-bounded organelle; GO:0043229 intracellular organelle; GO:0043231 intracellular membrane-bounded organelle; GO:0044424 intracellular part; GO:0044464 cell part;	GO:0003676 nucleic acid binding; GO:0003723 RNA binding; GO:0003824 catalytic activity; GO:0004518 nuclease activity; GO:0004519 endonuclease activity; GO:0005488 binding; GO:0016787 hydrolase activity; GO:0016788 hydrolase activity, acting on ester bonds; GO:0097159 organic cyclic compound binding; GO:1901363 heterocyclic compound binding;
Capana07g000031	ARF1_BRARP ADP-ribosylation factor 1 OS=Brassica rapa subsp. pekinensis GN=ARF1 PE=2 SV=3	0.584	Down	0.0046408	ARF1	23.575	39.7	60	5	5	123990	109520	148140	130570	122310	145240	76621	76425	69893	142750	96116	123580	105120	122540	117340	83200	100050	94190	85134	57924	56548	140960	162330	138230	chloroplast				K07942	ARL1; ADP-ribosylation factor-like protein 1		PF00025	ADP-ribosylation factor family
Capana07g000057	calmodulin-binding protein 60 B-like	0.547	Down	0.029599	---	73.011	21.2	49	8	8	192970	189700	195530	182940	171290	159930	129290	93546	93437	100640	145580	129630	197290	168370	221400	217020	179410	186600	147910	160500	115270	112300	108760	123780	nucleus
Capana07g000079	RNDI_DICDI Ribonuclease DdI OS=Dictyostelium discoideum GN=ddiA PE=1 SV=3	1.633	Up	2.1125e-05	ddiA	29.114	50	180	9	7	1045800	1094700	1062600	991540	979190	986310	1688500	1788600	1753300	821010	757110	788150	1287200	1320900	1362800	1778600	1770400	1737100	1702700	1706000	1671800	1886500	1935100	1848000	extracellular		GO:0005622 intracellular; GO:0005623 cell; GO:0005737 cytoplasm; GO:0044424 intracellular part; GO:0044464 cell part;		K01166	E3.1.27.1; ribonuclease T2 [EC:3.1.27.1]		PF00445	Ribonuclease T2 family
Capana07g000207	"FAD6C_BRANA Omega-6 fatty acid desaturase, chloroplastic OS=Brassica napus PE=2 SV=1"	0.624	Down	0.0034958	---	44.616	20.6	107	7	7	408910	417520	338150	383920	356230	332610	225720	252350	248870	179550	143070	136240	291730	297270	295820	330430	307570	260700	232380	188560	206180	312850	354600	386940	cytoplasm	GO:0006082 organic acid metabolic process; GO:0006629 lipid metabolic process; GO:0006631 fatty acid metabolic process; GO:0006633 fatty acid biosynthetic process; GO:0008152 metabolic process; GO:0008610 lipid biosynthetic process; GO:0009058 biosynthetic process; GO:0009314 response to radiation; GO:0009416 response to light stimulus; GO:0009628 response to abiotic stimulus; GO:0009642 response…	GO:0005622 intracellular; GO:0005623 cell; GO:0005737 cytoplasm; GO:0009507 chloroplast; GO:0009526 plastid envelope; GO:0009536 plastid; GO:0009941 chloroplast envelope; GO:0031967 organelle envelope; GO:0031975 envelope; GO:0043226 organelle; GO:0043227 membrane-bounded organelle; GO:0043229 intracellular organelle; GO:0043231 intracellular membrane-bounded organelle; GO:0044422 organelle part;…	GO:0005488 binding; GO:0005515 protein binding; GO:0019904 protein domain specific binding;	K10255	FAD6, desA; acyl-lipid omega-6 desaturase (Delta-12 desaturase) [EC:1.14.19.23 1.14.19.45]		PF00487	Fatty acid desaturase
Capana07g000227	"E13B_WHEAT Glucan endo-1,3-beta-glucosidase OS=Triticum aestivum GN=GLC1 PE=2 SV=1"	0.603	Down	0.00099924	GLC1	39.819	36.6	175	10	10	411150	375910	395200	422680	430680	432740	242970	256110	214270	410330	416240	422020	398100	391140	400060	280360	311930	328760	308070	308560	298720	678960	713920	704390	vacuolar membrane	GO:0000003 reproduction; GO:0003006 developmental process involved in reproduction; GO:0007275 multicellular organism development; GO:0009555 pollen development; GO:0009653 anatomical structure morphogenesis; GO:0009790 embryo development; GO:0009791 post-embryonic development; GO:0009793 embryo development ending in seed dormancy; GO:0009987 cellular process; GO:0010154 fruit development; GO:001…	GO:0005623 cell; GO:0005886 plasma membrane; GO:0016020 membrane; GO:0031224 intrinsic component of membrane; GO:0031225 anchored component of membrane; GO:0031226 intrinsic component of plasma membrane; GO:0044425 membrane part; GO:0044459 plasma membrane part; GO:0044464 cell part; GO:0046658 anchored component of plasma membrane; GO:0071944 cell periphery;	GO:0001871 pattern binding; GO:0003824 catalytic activity; GO:0004553 hydrolase activity, hydrolyzing O-glycosyl compounds; GO:0005488 binding; GO:0016787 hydrolase activity; GO:0016798 hydrolase activity, acting on glycosyl bonds; GO:0030246 carbohydrate binding; GO:0030247 polysaccharide binding;				PF00332	Glycosyl hydrolases family 17
Capana07g000266	MCM5A_XENLA DNA replication licensing factor mcm5-A OS=Xenopus laevis GN=mcm5-a PE=1 SV=2	0.24	Down	0.0035403	mcm5-a	82.235	20.6	43	10	10	114320	163440	129910	174220	171720	140150	0	37183	28142	137920	116190	158110	93561	71052	62650	113950	119060	106400	148920	118270	122710	132310	133860	117720	cytoplasm	GO:0006139 nucleobase-containing compound metabolic process; GO:0006259 DNA metabolic process; GO:0006260 DNA replication; GO:0006261 DNA-dependent DNA replication; GO:0006268 DNA unwinding involved in DNA replication; GO:0006275 regulation of DNA replication; GO:0006725 cellular aromatic compound metabolic process; GO:0006807 nitrogen compound metabolic process; GO:0006996 organelle organization…	GO:0000347 THO complex; GO:0000785 chromatin; GO:0005622 intracellular; GO:0005623 cell; GO:0005634 nucleus; GO:0005694 chromosome; GO:0005737 cytoplasm; GO:0032991 macromolecular complex; GO:0042555 MCM complex; GO:0043226 organelle; GO:0043227 membrane-bounded organelle; GO:0043228 non-membrane-bounded organelle; GO:0043229 intracellular organelle; GO:0043231 intracellular membrane-bounded orga…		K02209	MCM5, CDC46; DNA replication licensing factor MCM5 [EC:3.6.4.12]	cann03030 DNA replication	PF00493	MCM2/3/5 family
Capana07g000295	U5S1_MOUSE 116 kDa U5 small nuclear ribonucleoprotein component OS=Mus musculus GN=Eftud2 PE=2 SV=1	2.392	Up	0.00157512	Eftud2	110.67	16.3	61	9	9	53209	73313	60111	67927	48057	37523	135410	142490	168640	29370	21970	12882	81324	78684	69494	191430	141930	136760	244810	266560	250720	0	0	0	cytoplasm	GO:0000003 reproduction; GO:0003006 developmental process involved in reproduction; GO:0007275 multicellular organism development; GO:0009790 embryo development; GO:0009791 post-embryonic development; GO:0009793 embryo development ending in seed dormancy; GO:0009908 flower development; GO:0010154 fruit development; GO:0022414 reproductive process; GO:0032501 multicellular organismal process; GO:0…	GO:0005618 cell wall; GO:0005622 intracellular; GO:0005623 cell; GO:0005634 nucleus; GO:0005654 nucleoplasm; GO:0005681 spliceosomal complex; GO:0005684 U2-type spliceosomal complex; GO:0005730 nucleolus; GO:0005737 cytoplasm; GO:0005829 cytosol; GO:0005886 plasma membrane; GO:0005911 cell-cell junction; GO:0009506 plasmodesma; GO:0015030 Cajal body; GO:0016020 membrane; GO:0016604 nuclear body; …		K12852	EFTUD2; 116 kDa U5 small nuclear ribonucleoprotein component	cann03040 Spliceosome	PF00009; PF03144; PF03764; PF00679	Elongation factor Tu GTP binding domain; Elongation factor Tu domain 2; Elongation factor G, domain IV; Elongation factor G C-terminus
Capana07g000366	SPSA_SOLTU Probable sucrose-phosphate synthase OS=Solanum tuberosum GN=SPS PE=2 SV=1	1.57	Up	0.00042073	SPS	118.7	20.4	165	16	15	375950	349590	335970	282540	248770	304280	580260	530370	556930	354550	343270	337140	285570	277900	287770	411280	415530	434310	534690	579970	558540	181440	85447	110410	nucleus	GO:0006810 transport; GO:0046903 secretion; GO:0051179 localization; GO:0051234 establishment of localization; GO:0071836 nectar secretion;	GO:0005622 intracellular; GO:0005623 cell; GO:0005737 cytoplasm; GO:0005829 cytosol; GO:0005886 plasma membrane; GO:0005911 cell-cell junction; GO:0009506 plasmodesma; GO:0016020 membrane; GO:0030054 cell junction; GO:0044424 intracellular part; GO:0044444 cytoplasmic part; GO:0044464 cell part; GO:0055044 symplast; GO:0071944 cell periphery;	GO:0003824 catalytic activity; GO:0008194 UDP-glycosyltransferase activity; GO:0016740 transferase activity; GO:0016757 transferase activity, transferring glycosyl groups; GO:0016758 transferase activity, transferring hexosyl groups; GO:0035251 UDP-glucosyltransferase activity; GO:0046524 sucrose-phosphate synthase activity; GO:0046527 glucosyltransferase activity;	K00696	E2.4.1.14; sucrose-phosphate synthase [EC:2.4.1.14]	cann00500 Starch and sucrose metabolism; cann01100 Metabolic pathways
Capana07g000375	OPR3_SOLLC 12-oxophytodienoate reductase 3 OS=Solanum lycopersicum GN=OPR3 PE=1 SV=1	0.611	Down	0.00045918	OPR3	43.976	60.6	136	14	14	336820	322190	298450	276180	305530	293150	197880	183650	203540	248600	253640	269150	317970	329980	340540	323970	299150	255620	203030	209810	217400	344850	368210	374320	chloroplast	GO:0000003 reproduction; GO:0000302 response to reactive oxygen species; GO:0001101 response to acid chemical; GO:0003006 developmental process involved in reproduction; GO:0006082 organic acid metabolic process; GO:0006629 lipid metabolic process; GO:0006631 fatty acid metabolic process; GO:0006633 fatty acid biosynthetic process; GO:0006950 response to stress; GO:0006979 response to oxidative s…	GO:0005622 intracellular; GO:0005623 cell; GO:0005737 cytoplasm; GO:0005777 peroxisome; GO:0042579 microbody; GO:0043226 organelle; GO:0043227 membrane-bounded organelle; GO:0043229 intracellular organelle; GO:0043231 intracellular membrane-bounded organelle; GO:0044424 intracellular part; GO:0044444 cytoplasmic part; GO:0044464 cell part;	GO:0003824 catalytic activity; GO:0005488 binding; GO:0005515 protein binding; GO:0016491 oxidoreductase activity; GO:0016627 oxidoreductase activity, acting on the CH-CH group of donors; GO:0016628 oxidoreductase activity, acting on the CH-CH group of donors, NAD or NADP as acceptor; GO:0016629 12-oxophytodienoate reductase activity; GO:0042802 identical protein binding;	K05894	OPR; 12-oxophytodienoic acid reductase [EC:1.3.1.42]	cann00592 alpha-Linolenic acid metabolism; cann01100 Metabolic pathways; cann01110 Biosynthesis of secondary metabolites	PF00724	NADH:flavin oxidoreductase / NADH oxidase family
Capana07g000479	NOLC1_RAT Nucleolar and coiled-body phosphoprotein 1 OS=Rattus norvegicus GN=Nolc1 PE=1 SV=1	0.581	Down	0.0086193	Nolc1	47.061	15.9	58	4	4	51515	46007	36935	43984	38433	39414	27419	23312	27415	41414	41685	21185	40981	40897	43374	45046	40756	40975	43288	0	38982	44744	43688	50831	nucleus							PF05022	SRP40, C-terminal domain
Capana07g000545	PRP8_MOUSE Pre-mRNA-processing-splicing factor 8 OS=Mus musculus GN=Prpf8 PE=1 SV=2	1.623	Up	0.0029825	Prpf8	278.45	16.4	144	26	26	332780	281830	262680	189380	155920	189870	468390	454500	501600	199920	186320	217610	121820	158860	134490	362000	364340	369770	527660	564430	557680	16606	0	29678	cytoplasm				K12856	PRPF8, PRP8; pre-mRNA-processing factor 8	cann03040 Spliceosome	PF08082; PF08083; PF10598; PF10597; PF10596; PF12134; PF08084	PRO8NT (NUC069), PrP8 N-terminal domain; PROCN (NUC071) domain; RNA recognition motif of the spliceosomal PrP8; U5-snRNA binding site 2 of PrP8; U6-snRNA interacting domain of PrP8; PRP8 domain IV core; PROCT (NUC072) domain
Capana07g000645	SUBL_ARATH Subtilisin-like protease OS=Arabidopsis thaliana GN=ARA12 PE=1 SV=1	0.604	Down	0.00104118	ARA12	87.444	16.3	93	9	9	336610	279470	287630	318530	336980	307370	185870	180220	179420	128320	135890	119870	295330	315370	313140	345720	325060	307780	220060	220910	229890	199170	213320	236540	endoplasmic reticulum	GO:0006508 proteolysis; GO:0006807 nitrogen compound metabolic process; GO:0008152 metabolic process; GO:0019538 protein metabolic process; GO:0043170 macromolecule metabolic process; GO:0044238 primary metabolic process; GO:0071704 organic substance metabolic process; GO:1901564 organonitrogen compound metabolic process;		GO:0003824 catalytic activity; GO:0004175 endopeptidase activity; GO:0004252 serine-type endopeptidase activity; GO:0008233 peptidase activity; GO:0008236 serine-type peptidase activity; GO:0016787 hydrolase activity; GO:0017171 serine hydrolase activity; GO:0070011 peptidase activity, acting on L-amino acid peptides;				PF05922; PF00082	Peptidase inhibitor I9; Subtilase family
Capana07g000730	SUS2_SOLTU Sucrose synthase OS=Solanum tuberosum PE=3 SV=1	0.598	Down	0.0101389	---	91.356	19.6	47	11	10	173240	143830	146220	167580	150090	148890	75590	103510	97761	70882	64670	71725	76824	75385	57705	70517	69731	82610	68833	66850	88885	58980	26653	0	cytoplasm	GO:0000003 reproduction; GO:0001101 response to acid chemical; GO:0001666 response to hypoxia; GO:0003006 developmental process involved in reproduction; GO:0006950 response to stress; GO:0006970 response to osmotic stress; GO:0007275 multicellular organism development; GO:0009266 response to temperature stimulus; GO:0009409 response to cold; GO:0009413 response to flooding; GO:0009414 response t…	GO:0005622 intracellular; GO:0005623 cell; GO:0005737 cytoplasm; GO:0005773 vacuole; GO:0005829 cytosol; GO:0005886 plasma membrane; GO:0005911 cell-cell junction; GO:0009506 plasmodesma; GO:0016020 membrane; GO:0030054 cell junction; GO:0043226 organelle; GO:0043227 membrane-bounded organelle; GO:0043229 intracellular organelle; GO:0043231 intracellular membrane-bounded organelle; GO:0044424 int…	GO:0003824 catalytic activity; GO:0008194 UDP-glycosyltransferase activity; GO:0016157 sucrose synthase activity; GO:0016740 transferase activity; GO:0016757 transferase activity, transferring glycosyl groups; GO:0016758 transferase activity, transferring hexosyl groups; GO:0035251 UDP-glucosyltransferase activity; GO:0046527 glucosyltransferase activity;	K00695	E2.4.1.13; sucrose synthase [EC:2.4.1.13]	cann00500 Starch and sucrose metabolism; cann01100 Metabolic pathways
Capana07g000771	EFTS_PROM5 Elongation factor Ts OS=Prochlorococcus marinus (strain MIT 9515) GN=tsf PE=3 SV=1	2.868	Up	4.4851e-07	tsf	111.09	48.5	607	36	36	1945400	1841900	1832100	1679400	1649400	1587900	5348600	5461900	5318400	4548800	4378700	4409300	2298600	2293500	2313300	3003200	3018900	2974300	6821000	6590300	6697800	2239500	2099600	1876600	chloroplast				K02357	tsf, TSFM; elongation factor Ts		PF00575	S1 RNA binding domain
Capana07g000993	SUBL_ARATH Subtilisin-like protease OS=Arabidopsis thaliana GN=ARA12 PE=1 SV=1	0.607	Down	0.0029603	ARA12	78.454	30.6	140	13	12	493020	405330	387720	439240	397570	371480	254890	270740	255340	350990	390150	376480	240440	219130	248960	244730	219310	230080	264860	246040	256810	402980	356760	376230	cytoplasm	GO:0006508 proteolysis; GO:0006807 nitrogen compound metabolic process; GO:0008152 metabolic process; GO:0019538 protein metabolic process; GO:0043170 macromolecule metabolic process; GO:0044238 primary metabolic process; GO:0071704 organic substance metabolic process; GO:1901564 organonitrogen compound metabolic process;	GO:0005618 cell wall; GO:0005622 intracellular; GO:0005623 cell; GO:0005737 cytoplasm; GO:0005794 Golgi apparatus; GO:0005911 cell-cell junction; GO:0009505 plant-type cell wall; GO:0009506 plasmodesma; GO:0012505 endomembrane system; GO:0030054 cell junction; GO:0030312 external encapsulating structure; GO:0043226 organelle; GO:0043227 membrane-bounded organelle; GO:0043229 intracellular organel…	GO:0003824 catalytic activity; GO:0004175 endopeptidase activity; GO:0004252 serine-type endopeptidase activity; GO:0008233 peptidase activity; GO:0008236 serine-type peptidase activity; GO:0016787 hydrolase activity; GO:0017171 serine hydrolase activity; GO:0070011 peptidase activity, acting on L-amino acid peptides;				PF05922; PF00082	Peptidase inhibitor I9; Subtilase family
Capana07g001111	K6PF3_ARATH 6-phosphofructokinase 3 OS=Arabidopsis thaliana GN=PFK3 PE=1 SV=1	1.564	Up	0.0021773	PFK3	56.579	18.8	26	7	4	36765	32127	35764	44162	42375	34229	59412	53949	50243	25497	33091	0	45536	47049	36488	43688	42539	53068	32068	42669	40310	31439	44024	29557	cytoskeleton	GO:0005975 carbohydrate metabolic process; GO:0006082 organic acid metabolic process; GO:0006090 pyruvate metabolic process; GO:0006091 generation of precursor metabolites and energy; GO:0006096 glycolytic process; GO:0006139 nucleobase-containing compound metabolic process; GO:0006163 purine nucleotide metabolic process; GO:0006164 purine nucleotide biosynthetic process; GO:0006165 nucleoside di…	GO:0005622 intracellular; GO:0005623 cell; GO:0005737 cytoplasm; GO:0005829 cytosol; GO:0005886 plasma membrane; GO:0016020 membrane; GO:0044424 intracellular part; GO:0044444 cytoplasmic part; GO:0044464 cell part; GO:0071944 cell periphery;	GO:0003824 catalytic activity; GO:0003872 6-phosphofructokinase activity; GO:0008443 phosphofructokinase activity; GO:0016301 kinase activity; GO:0016740 transferase activity; GO:0016772 transferase activity, transferring phosphorus-containing groups; GO:0016773 phosphotransferase activity, alcohol group as acceptor; GO:0019200 carbohydrate kinase activity;	K00850	pfkA, PFK; 6-phosphofructokinase 1 [EC:2.7.1.11]	cann00010 Glycolysis / Gluconeogenesis; cann00030 Pentose phosphate pathway; cann00051 Fructose and mannose metabolism; cann00052 Galactose metabolism; cann01100 Metabolic pathways; cann01110 Biosynthesis of secondary metabolites; cann01200 Carbon metabolism; cann01230 Biosynthesis of amino acids; cann03018 RNA degradation	PF00365	Phosphofructokinase
Capana07g001411	ASOL_TOBAC L-ascorbate oxidase homolog OS=Nicotiana tabacum PE=2 SV=1	0.566	Down	0.0137793	---	60.903	25.7	33	9	7	174560	118040	122890	178040	113970	133350	78875	84360	71911	116530	90685	60889	94622	83543	91194	78176	136410	80565	0	0	66491	103200	136050	170260	vacuolar membrane							PF07732; PF00394; PF07731	Multicopper oxidase; Multicopper oxidase; Multicopper oxidase
Capana07g001548	XTH9_ARATH Xyloglucan endotransglucosylase/hydrolase protein 9 OS=Arabidopsis thaliana GN=XTH9 PE=2 SV=2	0.19	Down	3.1836e-07	XTH9	33.482	47	63	9	9	273220	265230	273600	208340	191210	211930	54369	50149	49948	127920	100740	93064	210620	212870	228510	142320	122170	139590	126350	118300	110900	146220	127410	136250	extracellular			GO:0003824 catalytic activity; GO:0016740 transferase activity; GO:0016757 transferase activity, transferring glycosyl groups; GO:0016758 transferase activity, transferring hexosyl groups; GO:0016762 xyloglucan:xyloglucosyl transferase activity; GO:0046527 glucosyltransferase activity;	K08235	E2.4.1.207; xyloglucan:xyloglucosyl transferase [EC:2.4.1.207]		PF00722	Glycosyl hydrolases family 16
Capana07g001782	RAA1F_ARATH Ras-related protein RABA1f OS=Arabidopsis thaliana GN=RABA1F PE=2 SV=1	0.611	Down	0.00190376	RABA1F	24.117	45.2	87	8	3	264200	246540	217680	272470	236390	232820	147600	139520	158390	191820	194090	190980	195470	191640	186470	172930	175120	153390	133160	130160	125330	311240	329390	338370	cytoplasm		GO:0005622 intracellular; GO:0005623 cell; GO:0005737 cytoplasm; GO:0005768 endosome; GO:0012505 endomembrane system; GO:0031410 cytoplasmic vesicle; GO:0031982 vesicle; GO:0043226 organelle; GO:0043227 membrane-bounded organelle; GO:0043229 intracellular organelle; GO:0044424 intracellular part; GO:0044444 cytoplasmic part; GO:0044464 cell part; GO:0097708 intracellular vesicle;					PF00071	Ras family
Capana07g001806	"TPS7_ARATH Probable alpha,alpha-trehalose-phosphate synthase [UDP-forming] 7 OS=Arabidopsis thaliana GN=TPS7 PE=1 SV=1"	2.664	Up	0.00094388	TPS7	96.638	17	75	10	8	72238	49226	62903	85678	62870	75151	167020	166690	157490	33282	38624	38583	73048	86181	94321	150210	152680	147550	183510	179360	182080	0	17361	0	chloroplast	GO:0005975 carbohydrate metabolic process; GO:0005984 disaccharide metabolic process; GO:0005991 trehalose metabolic process; GO:0005992 trehalose biosynthetic process; GO:0006793 phosphorus metabolic process; GO:0006796 phosphate-containing compound metabolic process; GO:0006950 response to stress; GO:0008152 metabolic process; GO:0009058 biosynthetic process; GO:0009311 oligosaccharide metaboli…	GO:0005622 intracellular; GO:0005623 cell; GO:0005737 cytoplasm; GO:0005829 cytosol; GO:0044424 intracellular part; GO:0044444 cytoplasmic part; GO:0044464 cell part;	GO:0003824 catalytic activity; GO:0016787 hydrolase activity; GO:0016788 hydrolase activity, acting on ester bonds; GO:0016791 phosphatase activity; GO:0042578 phosphoric ester hydrolase activity;	K16055	TPS; trehalose 6-phosphate synthase/phosphatase [EC:2.4.1.15 3.1.3.12]	cann00500 Starch and sucrose metabolism; cann01100 Metabolic pathways
Capana07g001961	KPRS4_SPIOL Ribose-phosphate pyrophosphokinase 4 OS=Spinacia oleracea GN=PRS4 PE=2 SV=1	0.639	Down	0.0002839	PRS4	35.783	51.1	125	10	7	159610	146140	153030	182610	174930	160610	92546	101580	99080	112050	87994	103530	126910	122360	125490	134160	129060	123670	106940	93902	99122	182500	186350	188590	cytoplasm		GO:0005622 intracellular; GO:0005623 cell; GO:0005737 cytoplasm; GO:0005829 cytosol; GO:0005886 plasma membrane; GO:0005911 cell-cell junction; GO:0009506 plasmodesma; GO:0016020 membrane; GO:0030054 cell junction; GO:0044424 intracellular part; GO:0044444 cytoplasmic part; GO:0044464 cell part; GO:0055044 symplast; GO:0071944 cell periphery;					PF13793; PF00156	N-terminal domain of ribose phosphate pyrophosphokinase; Phosphoribosyl transferase domain
Capana07g001994	PHG1A_DICDI Putative phagocytic receptor 1a OS=Dictyostelium discoideum GN=phg1a PE=2 SV=1	0.637	Down	0.0058426	phg1a	31.999	22.2	57	3	3	281800	243640	257170	275990	260940	264480	144920	166070	187020	170210	211640	191560	241300	206960	230790	259490	241520	197920	169830	0	163520	342350	360940	325950	chloroplast	GO:0032386 regulation of intracellular transport; GO:0032388 positive regulation of intracellular transport; GO:0032879 regulation of localization; GO:0032880 regulation of protein localization; GO:0033157 regulation of intracellular protein transport; GO:0048518 positive regulation of biological process; GO:0050789 regulation of biological process; GO:0051049 regulation of transport; GO:0051050 …	GO:0005622 intracellular; GO:0005623 cell; GO:0005737 cytoplasm; GO:0005768 endosome; GO:0005769 early endosome; GO:0005773 vacuole; GO:0005774 vacuolar membrane; GO:0005794 Golgi apparatus; GO:0005802 trans-Golgi network; GO:0005911 cell-cell junction; GO:0009506 plasmodesma; GO:0012505 endomembrane system; GO:0016020 membrane; GO:0016021 integral component of membrane; GO:0030054 cell junction;…
Capana07g002013	"RK4_TOBAC 50S ribosomal protein L4, chloroplastic OS=Nicotiana tabacum GN=RPL4 PE=2 SV=1"	2.511	Up	0.00175598	RPL4	30.112	33.3	70	6	6	169650	133470	185980	194530	160040	166900	373920	380420	473320	60185	54831	80399	623260	642700	622250	614800	618090	659150	1068400	1087000	1008800	248850	249280	267240	chloroplast	GO:0006412 translation; GO:0006518 peptide metabolic process; GO:0006807 nitrogen compound metabolic process; GO:0008152 metabolic process; GO:0009058 biosynthetic process; GO:0009059 macromolecule biosynthetic process; GO:0009987 cellular process; GO:0010467 gene expression; GO:0019538 protein metabolic process; GO:0034641 cellular nitrogen compound metabolic process; GO:0034645 cellular macromo…	GO:0000311 plastid large ribosomal subunit; GO:0000313 organellar ribosome; GO:0000315 organellar large ribosomal subunit; GO:0005622 intracellular; GO:0005623 cell; GO:0005634 nucleus; GO:0005737 cytoplasm; GO:0005829 cytosol; GO:0005840 ribosome; GO:0009507 chloroplast; GO:0009532 plastid stroma; GO:0009534 chloroplast thylakoid; GO:0009535 chloroplast thylakoid membrane; GO:0009536 plastid; GO…	GO:0003676 nucleic acid binding; GO:0003723 RNA binding; GO:0003727 single-stranded RNA binding; GO:0003735 structural constituent of ribosome; GO:0005198 structural molecule activity; GO:0005488 binding; GO:0008187 poly-pyrimidine tract binding; GO:0008266 poly(U) RNA binding; GO:0097159 organic cyclic compound binding; GO:1901363 heterocyclic compound binding;	K02926	RP-L4, MRPL4, rplD; large subunit ribosomal protein L4	cann03010 Ribosome
Capana07g002086	bPH_2 domain-containing protein	1.984	Up	0.0097608	---	22.014	16.3	40	3	3	57241	73168	94725	137140	80437	134020	160240	149310	137390	134680	153840	116090	139110	157240	142130	75520	92626	120020	40747	72865	137050	256350	224870	203770	chloroplast							PF03703	Bacterial PH domain
Capana07g002129	TTL1_ARATH TPR repeat-containing thioredoxin TTL1 OS=Arabidopsis thaliana GN=TTL1 PE=1 SV=1	0.617	Down	0.0141962	TTL1	73.138	16.2	39	7	7	96361	107730	99396	108030	114070	87314	61723	74959	50460	0	35871	83572	80468	77293	87701	60148	83670	45845	53557	50492	94649	0	35240	57535	nucleus	GO:0001101 response to acid chemical; GO:0006950 response to stress; GO:0006970 response to osmotic stress; GO:0009628 response to abiotic stimulus; GO:0009651 response to salt stress; GO:0009719 response to endogenous stimulus; GO:0009725 response to hormone; GO:0009737 response to abscisic acid; GO:0009787 regulation of abscisic acid-activated signaling pathway; GO:0009789 positive regulation o…						PF00085	Thioredoxin
Capana07g002194	"TRXM4_ARATH Thioredoxin M4, chloroplastic OS=Arabidopsis thaliana GN=At3g15360 PE=1 SV=2"	1.609	Up	0.036256	At3g15360	18.703	32	70	5	3	536530	792000	912910	945420	926610	950940	1144300	1253300	1210200	792690	1280000	778910	1101200	849970	1123000	585250	832500	818510	969160	955440	919100	1612800	1682600	1520200	chloroplast				K03671	trxA; thioredoxin 1		PF00085	Thioredoxin
Capana07g002235	AGD5_ARATH Probable ADP-ribosylation factor GTPase-activating protein AGD5 OS=Arabidopsis thaliana GN=AGD5 PE=1 SV=1	0.548	Down	0.0062573	AGD5	48.694	19.2	51	6	6	117120	97595	86398	66687	54060	67501	53409	62650	49093	25750	54262	50404	64024	88043	74353	57231	59939	78536	56224	52725	67761	77934	54597	71641	nucleus	GO:0000003 reproduction; GO:0001558 regulation of cell growth; GO:0003006 developmental process involved in reproduction; GO:0006810 transport; GO:0007275 multicellular organism development; GO:0009791 post-embryonic development; GO:0009838 abscission; GO:0009908 flower development; GO:0009987 cellular process; GO:0010227 floral organ abscission; GO:0016043 cellular component organization; GO:001…	GO:0005622 intracellular; GO:0005623 cell; GO:0005737 cytoplasm; GO:0005768 endosome; GO:0005794 Golgi apparatus; GO:0005802 trans-Golgi network; GO:0005829 cytosol; GO:0012505 endomembrane system; GO:0030135 coated vesicle; GO:0030136 clathrin-coated vesicle; GO:0031410 cytoplasmic vesicle; GO:0031982 vesicle; GO:0031984 organelle subcompartment; GO:0043226 organelle; GO:0043227 membrane-bounded…	GO:0005488 binding; GO:0005515 protein binding; GO:0030276 clathrin binding;	K12486	SMAP; stromal membrane-associated protein	cann04144 Endocytosis	PF01412	Putative GTPase activating protein for Arf
Capana07g002308	MOCS3_ARATH Adenylyltransferase and sulfurtransferase MOCS3 OS=Arabidopsis thaliana GN=MOCS3 PE=2 SV=1	0.577	Down	0.0040182	MOCS3	49.789	18.7	59	6	6	121850	119730	115820	114220	111680	114770	60940	63384	81875	66921	58310	63451	109590	93432	108130	107860	88197	92226	76453	77914	80194	126830	106030	118420	cytoplasm		GO:0005622 intracellular; GO:0005623 cell; GO:0005737 cytoplasm; GO:0044424 intracellular part; GO:0044464 cell part;	GO:0003824 catalytic activity; GO:0008265 Mo-molybdopterin cofactor sulfurase activity; GO:0016740 transferase activity; GO:0016782 transferase activity, transferring sulfur-containing groups; GO:0016783 sulfurtransferase activity;	K11996	MOCS3, UBA4; adenylyltransferase and sulfurtransferase [EC:2.7.7.80 2.8.1.11]	cann04122 Sulfur relay system	PF00899; PF00581	ThiF family; Rhodanese-like domain
Capana07g002322	MA651_ARATH 65-kDa microtubule-associated protein 1 OS=Arabidopsis thaliana GN=MAP65-1 PE=1 SV=1	1.733	Up	0.00078176	MAP65-1	62.793	26.1	92	10	10	152040	154150	178720	135490	131100	113050	296490	267210	276610	302760	312220	306510	153220	152050	158250	281790	187150	241180	408600	412110	429460	88125	91792	106290	cytoplasm	GO:0000226 microtubule cytoskeleton organization; GO:0000278 mitotic cell cycle; GO:0000281 mitotic cytokinesis; GO:0000910 cytokinesis; GO:0000911 cytokinesis by cell plate formation; GO:0006996 organelle organization; GO:0007010 cytoskeleton organization; GO:0007017 microtubule-based process; GO:0007049 cell cycle; GO:0007275 multicellular organism development; GO:0008283 cell proliferation; GO…	GO:0000922 spindle pole; GO:0005622 intracellular; GO:0005623 cell; GO:0005634 nucleus; GO:0005737 cytoplasm; GO:0005819 spindle; GO:0005856 cytoskeleton; GO:0005874 microtubule; GO:0005881 cytoplasmic microtubule; GO:0005938 cell cortex; GO:0009524 phragmoplast; GO:0009574 preprophase band; GO:0015630 microtubule cytoskeleton; GO:0030863 cortical cytoskeleton; GO:0030981 cortical microtubule cyt…	GO:0005488 binding; GO:0005515 protein binding; GO:0046983 protein dimerization activity;	K16732	PRC1; protein regulator of cytokinesis 1
Capana07g002335	GLPQ1_ARATH Probable glycerophosphoryl diester phosphodiesterase 1 OS=Arabidopsis thaliana GN=GPDL1 PE=1 SV=1	1.503	Up	0.00022277	GPDL1	82.637	23.1	99	10	10	246360	262870	272480	289290	258010	239580	401320	383230	390230	243610	209610	227990	293010	276140	257810	280890	284610	259630	345200	326410	371620	241130	250150	259430	plasma membrane	GO:0000902 cell morphogenesis; GO:0000904 cell morphogenesis involved in differentiation; GO:0005975 carbohydrate metabolic process; GO:0005976 polysaccharide metabolic process; GO:0006073 cellular glucan metabolic process; GO:0006950 response to stress; GO:0006952 defense response; GO:0006968 cellular defense response; GO:0007275 multicellular organism development; GO:0008152 metabolic process; …	GO:0005618 cell wall; GO:0005623 cell; GO:0005886 plasma membrane; GO:0005911 cell-cell junction; GO:0009505 plant-type cell wall; GO:0009506 plasmodesma; GO:0016020 membrane; GO:0030054 cell junction; GO:0030312 external encapsulating structure; GO:0031224 intrinsic component of membrane; GO:0031225 anchored component of membrane; GO:0031226 intrinsic component of plasma membrane; GO:0044425 mem…	GO:0003824 catalytic activity; GO:0005488 binding; GO:0005509 calcium ion binding; GO:0008081 phosphoric diester hydrolase activity; GO:0008889 glycerophosphodiester phosphodiesterase activity; GO:0016787 hydrolase activity; GO:0016788 hydrolase activity, acting on ester bonds; GO:0042578 phosphoric ester hydrolase activity; GO:0043167 ion binding; GO:0043169 cation binding; GO:0046872 metal ion …
Capana07g002391	UPL1_ARATH E3 ubiquitin-protein ligase UPL1 OS=Arabidopsis thaliana GN=UPL1 PE=1 SV=3	1.595	Up	0.024642	UPL1	416.32	4.9	29	10	10	40462	32645	34399	30944	26111	30717	45546	58914	67030	29228	31471	29870	23619	29442	23650	32792	49517	39493	79636	68104	78992	0	0	0	cytoplasm				K10592	HUWE1, MULE, ARF-BP1; E3 ubiquitin-protein ligase HUWE1 [EC:2.3.2.26]	cann04120 Ubiquitin mediated proteolysis	PF00627; PF00632	UBA/TS-N domain; HECT-domain (ubiquitin-transferase)
Capana07g002396	IMK2_ARATH Probably inactive leucine-rich repeat receptor-like protein kinase IMK2 OS=Arabidopsis thaliana GN=IMK2 PE=1 SV=1	0.349	Down	0.00075705	IMK2	88.889	12.3	33	6	6	101810	99826	80699	88449	98875	94946	38389	31458	28675	78494	59626	67087	41860	43291	36152	56658	35526	32694	37274	39279	34998	38007	0	36472	vacuolar membrane		GO:0005618 cell wall; GO:0005623 cell; GO:0005886 plasma membrane; GO:0005911 cell-cell junction; GO:0009505 plant-type cell wall; GO:0009506 plasmodesma; GO:0016020 membrane; GO:0030054 cell junction; GO:0030312 external encapsulating structure; GO:0044464 cell part; GO:0055044 symplast; GO:0071944 cell periphery;					PF00069	Protein kinase domain
Capana08g000081	MP701_ARATH Microtubule-associated protein 70-1 OS=Arabidopsis thaliana GN=MAP70.1 PE=1 SV=1	0.631	Down	0.0149008	MAP70.1	69.417	11.1	79	5	5	122630	103390	103790	85145	88508	87998	71237	57051	79867	89234	103400	102040	79974	89729	79062	77956	88009	88105	113700	103070	103020	71894	72463	59988	chloroplast
Capana08g000350	YIDA_SHIFL Phosphatase YidA OS=Shigella flexneri GN=yidA PE=3 SV=1	1.536	Up	0.00054257	yidA	24.397	36.3	93	5	5	438910	424260	428900	354820	327950	358230	661770	661430	660210	487930	488510	483470	373340	356280	337050	475380	488470	512990	628840	598720	603770	288910	266450	262190	cytoskeleton	GO:0006793 phosphorus metabolic process; GO:0006796 phosphate-containing compound metabolic process; GO:0008152 metabolic process; GO:0009987 cellular process; GO:0016311 dephosphorylation; GO:0044237 cellular metabolic process;		GO:0000287 magnesium ion binding; GO:0003824 catalytic activity; GO:0005488 binding; GO:0016787 hydrolase activity; GO:0016788 hydrolase activity, acting on ester bonds; GO:0016791 phosphatase activity; GO:0019203 carbohydrate phosphatase activity; GO:0042578 phosphoric ester hydrolase activity; GO:0043167 ion binding; GO:0043169 cation binding; GO:0046872 metal ion binding; GO:0050308 sugar-phos…				PF08282	haloacid dehalogenase-like hydrolase
Capana08g000464	HATB_ARATH Histone acetyltransferase type B catalytic subunit OS=Arabidopsis thaliana GN=HAG2 PE=2 SV=1	0.603	Down	0.000140892	HAG2	53.929	17.5	68	6	6	109880	119080	118620	130530	121970	136760	71506	71452	66452	98926	107500	103950	93701	103390	75278	86524	93574	82878	96147	104520	77703	117040	115700	89554	nucleus	GO:0006325 chromatin organization; GO:0006464 cellular protein modification process; GO:0006473 protein acetylation; GO:0006475 internal protein amino acid acetylation; GO:0006807 nitrogen compound metabolic process; GO:0006996 organelle organization; GO:0008152 metabolic process; GO:0009987 cellular process; GO:0016043 cellular component organization; GO:0016569 covalent chromatin modification; …	GO:0000228 nuclear chromosome; GO:0000785 chromatin; GO:0000790 nuclear chromatin; GO:0005622 intracellular; GO:0005623 cell; GO:0005634 nucleus; GO:0005694 chromosome; GO:0005737 cytoplasm; GO:0005829 cytosol; GO:0031974 membrane-enclosed lumen; GO:0031981 nuclear lumen; GO:0043226 organelle; GO:0043227 membrane-bounded organelle; GO:0043228 non-membrane-bounded organelle; GO:0043229 intracellul…	GO:0003824 catalytic activity; GO:0004402 histone acetyltransferase activity; GO:0005488 binding; GO:0005515 protein binding; GO:0008080 N-acetyltransferase activity; GO:0010485 H4 histone acetyltransferase activity; GO:0016407 acetyltransferase activity; GO:0016410 N-acyltransferase activity; GO:0016740 transferase activity; GO:0016746 transferase activity, transferring acyl groups; GO:0016747 t…	K11303	HAT1, KAT1; histone acetyltransferase 1 [EC:2.3.1.48]		PF10394	Histone acetyl transferase HAT1 N-terminus
Capana08g000591	MTA70_ORYSJ Probable N6-adenosine-methyltransferase MT-A70-like OS=Oryza sativa subsp. japonica GN=Os02g0672600 PE=2 SV=1	0.625	Down	0.0043561	Os02g0672600	48.867	8	43	2	2	45707	42373	36412	38048	28965	36278	27853	23877	26047	30130	23439	28402	33434	32979	34768	41527	34144	33370	32386	36096	30398	0	21840	0	chloroplast	GO:0001510 RNA methylation; GO:0006139 nucleobase-containing compound metabolic process; GO:0006725 cellular aromatic compound metabolic process; GO:0006807 nitrogen compound metabolic process; GO:0008152 metabolic process; GO:0009451 RNA modification; GO:0009987 cellular process; GO:0016070 RNA metabolic process; GO:0016071 mRNA metabolic process; GO:0016556 mRNA modification; GO:0032259 methyla…	GO:0005622 intracellular; GO:0005623 cell; GO:0005634 nucleus; GO:0005654 nucleoplasm; GO:0005737 cytoplasm; GO:0009507 chloroplast; GO:0009536 plastid; GO:0016604 nuclear body; GO:0016607 nuclear speck; GO:0031974 membrane-enclosed lumen; GO:0031981 nuclear lumen; GO:0032991 macromolecular complex; GO:0034708 methyltransferase complex; GO:0036396 MIS complex; GO:0043226 organelle; GO:0043227 mem…	GO:0003824 catalytic activity; GO:0008168 methyltransferase activity; GO:0008173 RNA methyltransferase activity; GO:0008174 mRNA methyltransferase activity; GO:0008757 S-adenosylmethionine-dependent methyltransferase activity; GO:0016422 mRNA (2'-O-methyladenosine-N6-)-methyltransferase activity; GO:0016740 transferase activity; GO:0016741 transferase activity, transferring one-carbon groups;	K05925	METTL3_14; mRNA (2'-O-methyladenosine-N6-)-methyltransferase [EC:2.1.1.62]
Capana08g000684	vegetative cell wall protein gp1	2.546	Up	0.029139	---	47.012	9.8	14	3	3	0	80182	145830	0	250980	0	333310	278760	251520	0	270720	390200	268190	424490	0	264790	0	187190	205260	212790	307710	259340	0	0	chloroplast
Capana08g000813	Putative ovule protein	0.562	Down	0.035215	---	52.197	10.8	22	3	3	62261	91227	72203	50567	58134	52183	34604	36426	55805	0	0	0	41308	40432	0	44628	0	23948	23138	37692	37571	54609	64953	48011	plasma membrane
Capana08g000817	LHP1_YEAST La protein homolog OS=Saccharomyces cerevisiae (strain ATCC 204508 / S288c) GN=LHP1 PE=1 SV=2	0.648	Down	3.6528e-05	LHP1	49.787	34.2	99	11	11	290850	277320	279690	226920	185990	223490	188770	179700	181300	302060	259140	246370	240960	221170	200040	216250	285710	260440	353530	331210	339860	107540	108540	98105	nucleus	GO:0006139 nucleobase-containing compound metabolic process; GO:0006396 RNA processing; GO:0006399 tRNA metabolic process; GO:0006725 cellular aromatic compound metabolic process; GO:0006807 nitrogen compound metabolic process; GO:0008033 tRNA processing; GO:0008152 metabolic process; GO:0009987 cellular process; GO:0010467 gene expression; GO:0016070 RNA metabolic process; GO:0034470 ncRNA proce…	GO:0005618 cell wall; GO:0005622 intracellular; GO:0005623 cell; GO:0005634 nucleus; GO:0005654 nucleoplasm; GO:0005730 nucleolus; GO:0005737 cytoplasm; GO:0005829 cytosol; GO:0030312 external encapsulating structure; GO:0031974 membrane-enclosed lumen; GO:0031981 nuclear lumen; GO:0043226 organelle; GO:0043227 membrane-bounded organelle; GO:0043228 non-membrane-bounded organelle; GO:0043229 intr…	GO:0000049 tRNA binding; GO:0003676 nucleic acid binding; GO:0003723 RNA binding; GO:0005488 binding; GO:0097159 organic cyclic compound binding; GO:1901363 heterocyclic compound binding;	K11090	LA, SSB; lupus La protein		PF05383; PF00076; PF08777	La domain; RNA recognition motif. (a.k.a. RRM, RBD, or RNP domain); RNA binding motif
Capana08g000820	"AAT3_ARATH Aspartate aminotransferase, chloroplastic OS=Arabidopsis thaliana GN=ASP3 PE=1 SV=1"	0.586	Down	0.00101773	ASP3	49.732	11.3	58	4	3	99361	100580	95503	108090	127410	116010	63443	51415	58193	88075	85956	87409	89318	96194	89246	74557	65629	70797	53465	49840	46859	144660	145860	154080	cytoplasm	GO:0006082 organic acid metabolic process; GO:0006091 generation of precursor metabolites and energy; GO:0006099 tricarboxylic acid cycle; GO:0006101 citrate metabolic process; GO:0006103 2-oxoglutarate metabolic process; GO:0006520 cellular amino acid metabolic process; GO:0006522 alanine metabolic process; GO:0006531 aspartate metabolic process; GO:0006536 glutamate metabolic process; GO:000680…	GO:0005622 intracellular; GO:0005623 cell; GO:0005737 cytoplasm; GO:0005777 peroxisome; GO:0009536 plastid; GO:0016020 membrane; GO:0042579 microbody; GO:0043226 organelle; GO:0043227 membrane-bounded organelle; GO:0043229 intracellular organelle; GO:0043231 intracellular membrane-bounded organelle; GO:0044424 intracellular part; GO:0044444 cytoplasmic part; GO:0044464 cell part;	GO:0003824 catalytic activity; GO:0004069 L-aspartate:2-oxoglutarate aminotransferase activity; GO:0008483 transaminase activity; GO:0016740 transferase activity; GO:0016769 transferase activity, transferring nitrogenous groups;	K14454	GOT1; aspartate aminotransferase, cytoplasmic [EC:2.6.1.1]	cann00220 Arginine biosynthesis; cann00250 Alanine, aspartate and glutamate metabolism; cann00270 Cysteine and methionine metabolism; cann00330 Arginine and proline metabolism; cann00350 Tyrosine metabolism; cann00360 Phenylalanine metabolism; cann00400 Phenylalanine, tyrosine and tryptophan biosynthesis; cann00710 Carbon fixation in photosynthetic organisms; cann00950 Isoquinoline alkaloid biosy…	PF00155	Aminotransferase class I and II
Capana08g000886	PRL1_ARATH Protein pleiotropic regulatory locus 1 OS=Arabidopsis thaliana GN=PRL1 PE=1 SV=1	0.587	Down	0.031641	PRL1	53.539	26.7	30	7	7	119080	91595	86392	120520	121490	116110	0	54095	62175	55907	52554	33758	89293	64369	68052	75505	69158	65305	70490	66635	43096	52918	65101	64630	nucleus				K12862	PLRG1, PRL1, PRP46; pleiotropic regulator 1	cann03040 Spliceosome
Capana08g000961	FACE1_ARATH CAAX prenyl protease 1 homolog OS=Arabidopsis thaliana GN=FACE1 PE=1 SV=1	0.534	Down	0.0025625	FACE1	13.992	31.5	37	2	2	122050	93306	113620	120580	109480	89412	64135	55398	56090	81765	56386	67722	80215	59113	85502	95204	72354	68986	55929	53064	48258	102480	122390	133580	mitochondria	GO:0006508 proteolysis; GO:0006807 nitrogen compound metabolic process; GO:0008152 metabolic process; GO:0009987 cellular process; GO:0010467 gene expression; GO:0016485 protein processing; GO:0019538 protein metabolic process; GO:0043170 macromolecule metabolic process; GO:0044237 cellular metabolic process; GO:0044238 primary metabolic process; GO:0044260 cellular macromolecule metabolic proces…	GO:0005622 intracellular; GO:0005623 cell; GO:0005737 cytoplasm; GO:0005773 vacuole; GO:0005783 endoplasmic reticulum; GO:0005789 endoplasmic reticulum membrane; GO:0012505 endomembrane system; GO:0016020 membrane; GO:0016021 integral component of membrane; GO:0030176 integral component of endoplasmic reticulum membrane; GO:0031224 intrinsic component of membrane; GO:0031227 intrinsic component o…	GO:0003824 catalytic activity; GO:0004175 endopeptidase activity; GO:0004222 metalloendopeptidase activity; GO:0008233 peptidase activity; GO:0008237 metallopeptidase activity; GO:0016787 hydrolase activity; GO:0070011 peptidase activity, acting on L-amino acid peptides;	K06013	STE24; STE24 endopeptidase [EC:3.4.24.84]	cann00900 Terpenoid backbone biosynthesis	PF01435	Peptidase family M48
Capana08g001014	GDL61_ARATH GDSL esterase/lipase At4g01130 OS=Arabidopsis thaliana GN=At4g01130 PE=2 SV=1	0.35	Down	3.8122e-05	At4g01130	41.549	19.6	41	4	4	80612	75598	68165	94756	82195	97686	26129	26980	25366	49760	63289	63419	63866	68467	62357	66076	68069	67040	29837	32150	27974	103690	115630	109250	extracellular
Capana08g001035	MCFB_DICDI Mitochondrial substrate carrier family protein B OS=Dictyostelium discoideum GN=mcfB PE=3 SV=1	0.588	Down	0.0089782	mcfB	38.621	17.7	28	4	3	95786	91369	68397	82173	64886	60366	52314	47067	50736	50846	51804	46064	54659	51464	57295	64359	61610	82190	46507	58066	55581	65843	53736	65412	cytoplasm				K14684	SLC25A23S; solute carrier family 25 (mitochondrial phosphate transporter), member 23/24/25/41
Capana08g001068	SDL5A_SOYBN Dynamin-related protein 5A OS=Glycine max PE=2 SV=1	0.419	Down	0.000156542	---	68.259	29.5	26	14	7	724410	767720	729360	692460	631140	688770	303720	345250	281260	366120	348400	423490	420770	336060	376360	0	307700	266010	335690	282680	276610	577550	401510	420990	cytoplasm							PF00350	Dynamin family
Capana08g001084	NLTP6_AMBAR Non-specific lipid-transfer protein OS=Ambrosia artemisiifolia PE=1 SV=1	1.602	Up	0.0025802	---	16.015	18.4	31	2	2	204970	191980	207300	220840	206530	220800	322390	323820	321380	241560	249650	237070	209160	220660	220650	294090	296380	296850	317240	303430	314630	375560	388180	396390	extracellular
Capana08g001159	C98A2_SOYBN Cytochrome P450 98A2 OS=Glycine max GN=CYP98A2 PE=2 SV=1	0.488	Down	0.0024395	CYP98A2	58.039	4.5	26	2	2	54602	59462	56978	63709	0	0	22638	32298	28545	32550	47754	38980	0	41790	49338	54070	58715	50217	37223	35330	38927	43382	0	51859	chloroplast				K09754	CYP98A, C3'H; coumaroylquinate(coumaroylshikimate) 3'-monooxygenase [EC:1.14.13.36]	cann00940 Phenylpropanoid biosynthesis; cann00941 Flavonoid biosynthesis; cann00945 Stilbenoid, diarylheptanoid and gingerol biosynthesis; cann01100 Metabolic pathways; cann01110 Biosynthesis of secondary metabolites	PF00067	Cytochrome P450
Capana08g001163	DNJC2_RAT DnaJ homolog subfamily C member 2 OS=Rattus norvegicus GN=Dnajc2 PE=2 SV=1	0.544	Down	0.00048145	Dnajc2	74.062	11.5	33	5	5	130510	115730	107530	78236	67021	75213	63209	63273	66010	67652	64548	71354	61770	58287	59017	78163	78112	76894	95451	70968	84417	49695	43518	34271	nucleus	GO:0001558 regulation of cell growth; GO:0006355 regulation of transcription, DNA-templated; GO:0009889 regulation of biosynthetic process; GO:0009891 positive regulation of biosynthetic process; GO:0009893 positive regulation of metabolic process; GO:0010468 regulation of gene expression; GO:0010556 regulation of macromolecule biosynthetic process; GO:0010557 positive regulation of macromolecule…	GO:0005622 intracellular; GO:0005623 cell; GO:0005634 nucleus; GO:0005737 cytoplasm; GO:0005829 cytosol; GO:0043226 organelle; GO:0043227 membrane-bounded organelle; GO:0043229 intracellular organelle; GO:0043231 intracellular membrane-bounded organelle; GO:0044424 intracellular part; GO:0044444 cytoplasmic part; GO:0044464 cell part;	GO:0003682 chromatin binding; GO:0005488 binding; GO:0005515 protein binding; GO:0042393 histone binding; GO:0061649 ubiquitinated histone binding;	K09522	DNAJC2; DnaJ homolog subfamily C member 2		PF00226; PF00249	DnaJ domain; Myb-like DNA-binding domain
Capana08g001188	"GYRA_NICBE DNA gyrase subunit A, chloroplastic/mitochondrial OS=Nicotiana benthamiana GN=GYRA PE=2 SV=1"	1.798	Up	0.0021953	GYRA	84.336	17.9	80	10	10	171000	187320	212100	171510	150690	168830	377030	310690	338300	226820	238830	260180	102880	107760	97019	208530	191720	186040	231790	242110	251490	0	0	73521	cytoplasm		GO:0005622 intracellular; GO:0005623 cell; GO:0005634 nucleus; GO:0005654 nucleoplasm; GO:0005737 cytoplasm; GO:0005739 mitochondrion; GO:0009295 nucleoid; GO:0009507 chloroplast; GO:0009536 plastid; GO:0016592 mediator complex; GO:0031974 membrane-enclosed lumen; GO:0031981 nuclear lumen; GO:0032991 macromolecular complex; GO:0043226 organelle; GO:0043227 membrane-bounded organelle; GO:0043229 i…		K02469	gyrA; DNA gyrase subunit A [EC:5.99.1.3]
Capana08g001224	"EFTM_ARATH Elongation factor Tu, mitochondrial OS=Arabidopsis thaliana GN=TUFA PE=1 SV=1"	0.435	Down	0.0098185	TUFA	31.474	38.7	40	9	1	94503	104870	73631	74365	60004	51338	41428	37648	0	31576	20752	0	46065	46769	34119	92519	46812	43073	0	53115	0	20295	41507	37445	cytoplasm	GO:0010035 response to inorganic substance; GO:0010038 response to metal ion; GO:0042221 response to chemical; GO:0046686 response to cadmium ion; GO:0050896 response to stimulus;	GO:0005618 cell wall; GO:0005622 intracellular; GO:0005623 cell; GO:0005737 cytoplasm; GO:0005739 mitochondrion; GO:0030312 external encapsulating structure; GO:0043226 organelle; GO:0043227 membrane-bounded organelle; GO:0043229 intracellular organelle; GO:0043231 intracellular membrane-bounded organelle; GO:0044424 intracellular part; GO:0044444 cytoplasmic part; GO:0044464 cell part; GO:007194…	GO:0000166 nucleotide binding; GO:0005488 binding; GO:0005524 ATP binding; GO:0008144 drug binding; GO:0008270 zinc ion binding; GO:0017076 purine nucleotide binding; GO:0030554 adenyl nucleotide binding; GO:0032553 ribonucleotide binding; GO:0032555 purine ribonucleotide binding; GO:0032559 adenyl ribonucleotide binding; GO:0035639 purine ribonucleoside triphosphate binding; GO:0036094 small mol…	K02358	tuf, TUFM; elongation factor Tu		PF03144; PF03143	Elongation factor Tu domain 2; Elongation factor Tu C-terminal domain
Capana08g001265	ANXD3_ARATH Annexin D3 OS=Arabidopsis thaliana GN=ANN3 PE=2 SV=2	0.526	Down	0.00088156	ANN3	35.819	40.6	77	9	9	179520	171850	169730	171260	171760	172390	79070	94696	100010	163970	166060	167190	150600	170010	166830	175160	163250	138200	131010	119150	101590	241780	229570	211470	chloroplast	GO:0001101 response to acid chemical; GO:0006950 response to stress; GO:0006970 response to osmotic stress; GO:0009266 response to temperature stimulus; GO:0009408 response to heat; GO:0009409 response to cold; GO:0009414 response to water deprivation; GO:0009415 response to water; GO:0009628 response to abiotic stimulus; GO:0009651 response to salt stress; GO:0010035 response to inorganic substa…	GO:0005622 intracellular; GO:0005623 cell; GO:0005737 cytoplasm; GO:0005773 vacuole; GO:0043226 organelle; GO:0043227 membrane-bounded organelle; GO:0043229 intracellular organelle; GO:0043231 intracellular membrane-bounded organelle; GO:0044424 intracellular part; GO:0044444 cytoplasmic part; GO:0044464 cell part;		K17098	ANNAT; annexin D
Capana08g001266	ANXD4_ARATH Annexin D4 OS=Arabidopsis thaliana GN=ANN4 PE=2 SV=1	0.481	Down	7.517e-05	ANN4	36.266	51.9	229	14	14	767930	728560	672710	714150	727540	703630	358130	335550	349840	804990	855070	817810	604450	635100	609340	540230	547990	578510	525540	504960	549970	1150300	1228000	1254000	cytoskeleton	GO:0001101 response to acid chemical; GO:0006950 response to stress; GO:0006970 response to osmotic stress; GO:0009266 response to temperature stimulus; GO:0009408 response to heat; GO:0009409 response to cold; GO:0009414 response to water deprivation; GO:0009415 response to water; GO:0009628 response to abiotic stimulus; GO:0009651 response to salt stress; GO:0009719 response to endogenous stimu…	GO:0005911 cell-cell junction; GO:0009506 plasmodesma; GO:0030054 cell junction; GO:0055044 symplast;	GO:0003676 nucleic acid binding; GO:0003723 RNA binding; GO:0003729 mRNA binding; GO:0005488 binding; GO:0097159 organic cyclic compound binding; GO:1901363 heterocyclic compound binding;	K17098	ANNAT; annexin D
Capana08g001374	"U603_ARATH UPF0603 protein At1g54780, chloroplastic OS=Arabidopsis thaliana GN=At1g54780 PE=1 SV=1"	1.511	Up	0.0182809	At1g54780	31.741	44.3	205	11	11	3298500	4233500	4716600	4439200	4957800	5199100	6527500	6052700	5922600	6975400	7028700	7072600	4974500	4893100	4983300	3726000	4300700	4930000	4627900	4785600	5504100	8593600	8277200	7766600	chloroplast	GO:0006091 generation of precursor metabolites and energy; GO:0006793 phosphorus metabolic process; GO:0006796 phosphate-containing compound metabolic process; GO:0006807 nitrogen compound metabolic process; GO:0008152 metabolic process; GO:0009765 photosynthesis, light harvesting; GO:0009987 cellular process; GO:0010206 photosystem II repair; GO:0015979 photosynthesis; GO:0016311 dephosphorylati…	GO:0005622 intracellular; GO:0005623 cell; GO:0005737 cytoplasm; GO:0009507 chloroplast; GO:0009534 chloroplast thylakoid; GO:0009535 chloroplast thylakoid membrane; GO:0009536 plastid; GO:0009579 thylakoid; GO:0016020 membrane; GO:0031976 plastid thylakoid; GO:0031977 thylakoid lumen; GO:0031984 organelle subcompartment; GO:0034357 photosynthetic membrane; GO:0042651 thylakoid membrane; GO:00432…	GO:0003824 catalytic activity; GO:0003993 acid phosphatase activity; GO:0016787 hydrolase activity; GO:0016788 hydrolase activity, acting on ester bonds; GO:0016791 phosphatase activity; GO:0042578 phosphoric ester hydrolase activity;				PF04536	Repair protein
Capana08g001434	YIPF1_DICDI Protein YIPF1 homolog OS=Dictyostelium discoideum GN=yipf1 PE=3 SV=1	0.58	Down	0.0035971	yipf1	30.708	27.5	29	4	4	77180	85420	68114	103440	92993	84020	39889	49001	44894	48204	47769	49012	75143	95239	62093	83284	80495	81389	44266	42364	36655	129970	123620	143710	plasma membrane				K22940			PF04893	Yip1 domain
Capana08g001470	AAE_RAUSE Acetylajmalan esterase OS=Rauvolfia serpentina GN=AAE PE=1 SV=1	0.544	Down	0.0349	AAE	37.998	21.9	37	4	4	84660	74220	62446	77194	74660	75495	0	33549	46671	31828	36696	0	57142	34235	40174	35172	32708	40161	19948	19593	18671	126170	127910	127940	nucleus
Capana08g001512	XTH_TOBAC Probable xyloglucan endotransglucosylase/hydrolase protein OS=Nicotiana tabacum GN=XTH PE=2 SV=1	0.466	Down	7.7558e-05	XTH	27.901	54.1	121	10	10	1012800	993260	1095400	1163400	1234600	1216100	497190	449220	498920	910540	928820	924060	836510	852950	886980	577730	602670	614590	502220	495990	524930	1218700	1284000	1241100	extracellular				K08235	E2.4.1.207; xyloglucan:xyloglucosyl transferase [EC:2.4.1.207]		PF00722	Glycosyl hydrolases family 16
Capana08g001687	titin	2.947	Up	1.72184e-05	---	86.853	65.7	503	45	45	1014700	955390	905220	718070	702530	659080	2699100	2809100	2963600	2648500	2626100	2607400	1096700	1072700	1120800	1686200	1642800	1530100	4214800	4028600	3914600	696130	682570	812140	cytoplasm
Capana08g001688	CAES_ARATH Probable carbohydrate esterase At4g34215 OS=Arabidopsis thaliana GN=At4g34215 PE=1 SV=2	0.646	Down	0.0158006	At4g34215	29.191	39.8	11	6	6	156070	131640	129810	213810	128450	149700	0	84792	95215	112390	141280	115770	155940	468540	135420	0	101220	0	127880	0	111920	110220	141880	161230	chloroplast							PF03629	Domain of unknown function (DUF303)
Capana08g001716	GUN25_ARATH Endoglucanase 25 OS=Arabidopsis thaliana GN=KOR PE=1 SV=1	0.584	Down	1.5255e-06	KOR	68.612	15.7	43	7	4	101180	103890	102590	71820	73545	78226	58945	59477	61405	30331	20704	29021	104920	101720	122550	91091	77261	71866	78652	70816	73463	0	0	0	chloroplast	GO:0000226 microtubule cytoskeleton organization; GO:0000271 polysaccharide biosynthetic process; GO:0000902 cell morphogenesis; GO:0005975 carbohydrate metabolic process; GO:0005976 polysaccharide metabolic process; GO:0006073 cellular glucan metabolic process; GO:0006950 response to stress; GO:0006970 response to osmotic stress; GO:0006972 hyperosmotic response; GO:0006996 organelle organizatio…	GO:0005622 intracellular; GO:0005623 cell; GO:0005737 cytoplasm; GO:0005768 endosome; GO:0005769 early endosome; GO:0005794 Golgi apparatus; GO:0005802 trans-Golgi network; GO:0005886 plasma membrane; GO:0009504 cell plate; GO:0012505 endomembrane system; GO:0016020 membrane; GO:0031410 cytoplasmic vesicle; GO:0031982 vesicle; GO:0031984 organelle subcompartment; GO:0043226 organelle; GO:0043227 …	GO:0003824 catalytic activity; GO:0004553 hydrolase activity, hydrolyzing O-glycosyl compounds; GO:0008810 cellulase activity; GO:0016787 hydrolase activity; GO:0016798 hydrolase activity, acting on glycosyl bonds;	K01179	E3.2.1.4; endoglucanase [EC:3.2.1.4]	cann00500 Starch and sucrose metabolism; cann01100 Metabolic pathways	PF00759	Glycosyl hydrolase family 9
Capana08g001717	EIF3C_MEDTR Eukaryotic translation initiation factor 3 subunit C OS=Medicago truncatula GN=TIF3C1 PE=2 SV=1	1.516	Up	5.656e-05	TIF3C1	104.32	11.5	104	8	8	104750	104690	103280	101710	109190	115690	160560	162420	151100	81756	77782	70556	111340	105000	109080	136050	124550	138870	162470	165540	179300	82919	91461	90352	nucleus	GO:0006412 translation; GO:0006413 translational initiation; GO:0006518 peptide metabolic process; GO:0006807 nitrogen compound metabolic process; GO:0008152 metabolic process; GO:0009058 biosynthetic process; GO:0009059 macromolecule biosynthetic process; GO:0009987 cellular process; GO:0010467 gene expression; GO:0019538 protein metabolic process; GO:0034641 cellular nitrogen compound metabolic…	GO:0005622 intracellular; GO:0005623 cell; GO:0005634 nucleus; GO:0005737 cytoplasm; GO:0005829 cytosol; GO:0005852 eukaryotic translation initiation factor 3 complex; GO:0032991 macromolecular complex; GO:0043226 organelle; GO:0043227 membrane-bounded organelle; GO:0043229 intracellular organelle; GO:0043231 intracellular membrane-bounded organelle; GO:0044424 intracellular part; GO:0044444 cyto…	GO:0003676 nucleic acid binding; GO:0003723 RNA binding; GO:0003729 mRNA binding; GO:0005488 binding; GO:0005515 protein binding; GO:0031369 translation initiation factor binding; GO:0097159 organic cyclic compound binding; GO:1901363 heterocyclic compound binding;	K03252	EIF3C; translation initiation factor 3 subunit C	cann03013 RNA transport	PF01399	PCI domain
Capana08g001828	YTHD2_MACFA YTH domain family protein 2 OS=Macaca fascicularis GN=YTHDF2 PE=2 SV=1	0.576	Down	0.0033642	YTHDF2	60.217	15	33	6	6	53776	57280	65351	44323	41910	49704	29425	36106	36063	54841	80127	66866	62495	60216	62079	40772	37796	38638	37047	41947	52169	108530	111810	108550	nucleus				K20102	YTHDF; YTH domain-containing family protein		PF04146	YT521-B-like domain
Capana08g001908	Putative ovule protein	0.618	Down	0.033641	---	18.81	38.9	38	4	3	62091	71278	69634	78875	83166	88760	48164	30245	47157	75612	54497	58744	57095	87728	84142	68787	73609	63985	63861	62676	60831	164420	184220	173840	chloroplast							PF06232	Embryo-specific protein 3, (ATS3)
Capana08g001966	CSN8_ARATH COP9 signalosome complex subunit 8 OS=Arabidopsis thaliana GN=CSN8 PE=1 SV=1	0.631	Down	0.0118833	CSN8	22.543	26.9	46	4	4	148820	135130	110910	112310	108640	110070	75999	80730	92516	119930	138160	130250	123870	123150	111310	94834	96557	109560	87049	109360	93998	143800	138710	137770	cytoplasm	GO:0000338 protein deneddylation; GO:0001101 response to acid chemical; GO:0006464 cellular protein modification process; GO:0006508 proteolysis; GO:0006807 nitrogen compound metabolic process; GO:0008152 metabolic process; GO:0009314 response to radiation; GO:0009416 response to light stimulus; GO:0009628 response to abiotic stimulus; GO:0009719 response to endogenous stimulus; GO:0009725 respon…	GO:0005622 intracellular; GO:0005623 cell; GO:0005634 nucleus; GO:0043226 organelle; GO:0043227 membrane-bounded organelle; GO:0043229 intracellular organelle; GO:0043231 intracellular membrane-bounded organelle; GO:0044424 intracellular part; GO:0044464 cell part;	GO:0003824 catalytic activity; GO:0004175 endopeptidase activity; GO:0004222 metalloendopeptidase activity; GO:0008233 peptidase activity; GO:0008237 metallopeptidase activity; GO:0016787 hydrolase activity; GO:0070011 peptidase activity, acting on L-amino acid peptides;	K12181	COPS8, CSN8; COP9 signalosome complex subunit 8
Capana08g002037	P2C09_ARATH Probable protein phosphatase 2C 9 OS=Arabidopsis thaliana GN=At1g22280 PE=1 SV=1	1.544	Up	0.024443	At1g22280	12.355	45.1	41	3	3	44248	41264	0	45915	46268	44581	66988	74001	56982	72038	36381	60297	64321	71853	63037	48388	55161	54128	61089	60695	61827	81531	82904	48436	cytoplasm		GO:0005623 cell; GO:0005886 plasma membrane; GO:0016020 membrane; GO:0044464 cell part; GO:0071944 cell periphery;		K17506	PPM1L, PP2CE; protein phosphatase 1L [EC:3.1.3.16]
Capana08g002117	Putative ovule protein	1.512	Up	0.039564	---	22.526	19.2	71	4	4	176300	247180	282670	282990	294480	319430	339870	351290	376290	268720	254910	273640	330010	316180	313220	283610	308050	317130	263580	303400	272350	331610	322750	272160	plasma membrane
Capana08g002159	PB1 domain-containing protein	0.635	Down	0.0026374	---	53.802	36.7	113	9	9	443890	457470	437350	421810	380530	420920	259400	322210	267740	345450	397300	367640	480920	458400	480190	442470	441510	399800	384920	417080	394770	285010	366670	405440	nucleus							PF00564	PB1 domain
Capana08g002266	HSP12_MEDSA 18.2 kDa class I heat shock protein OS=Medicago sativa GN=HSP18.2 PE=2 SV=1	1.595	Up	0.035279	HSP18.2	18.122	17	29	3	1	31106	35026	49804	56405	93888	58582	54628	62571	67755	176470	138760	263260	21467	23119	20440	23799	29789	26053	219440	145350	75126	196920	159790	296920	cytoplasm	GO:0000302 response to reactive oxygen species; GO:0006950 response to stress; GO:0006979 response to oxidative stress; GO:0009266 response to temperature stimulus; GO:0009314 response to radiation; GO:0009408 response to heat; GO:0009416 response to light stimulus; GO:0009628 response to abiotic stimulus; GO:0009636 response to toxic substance; GO:0009642 response to light intensity; GO:0009644 …	GO:0005622 intracellular; GO:0005623 cell; GO:0005737 cytoplasm; GO:0009507 chloroplast; GO:0009536 plastid; GO:0043226 organelle; GO:0043227 membrane-bounded organelle; GO:0043229 intracellular organelle; GO:0043231 intracellular membrane-bounded organelle; GO:0044424 intracellular part; GO:0044444 cytoplasmic part; GO:0044464 cell part;		K13993	HSP20; HSP20 family protein	cann04141 Protein processing in endoplasmic reticulum
Capana08g002306	CHIC_SOLLC Basic 30 kDa endochitinase OS=Solanum lycopersicum GN=CHI9 PE=1 SV=1	0.601	Down	0.020601	CHI9	26.652	57.2	95	8	7	100770	105370	80637	138970	120120	95980	67723	46038	58339	144650	198170	159820	1256700	1382200	1419800	978070	989530	983540	833000	792690	822180	2156500	2187000	2217000	mitochondria				K20547	CHIB; basic endochitinase B [EC:3.2.1.14]	cann00520 Amino sugar and nucleotide sugar metabolism; cann01100 Metabolic pathways; cann04016 MAPK signaling pathway - plant	PF00182	Chitinase class I
Capana08g002468	DIOX3_PAPSO Codeine O-demethylase OS=Papaver somniferum GN=CODM PE=1 SV=1	0.636	Down	0.0064967	CODM	40.641	22.9	47	7	6	122420	145200	149340	107210	129200	107170	87355	98180	79576	77431	74062	91212	37101	39771	40301	19949	0	24439	33354	37718	51192	38104	44102	53336	cytoplasm							PF03171	2OG-Fe(II) oxygenase superfamily
Capana08g002562	DRTS_DAUCA Bifunctional dihydrofolate reductase-thymidylate synthase OS=Daucus carota PE=2 SV=1	0.64	Down	0.00049567	---	58.826	22	42	7	7	78238	79270	80438	75902	73388	96942	54796	47340	50164	49547	52122	42957	57705	67161	55317	62126	70183	59350	52433	48222	50145	106980	106300	108340	chloroplast	GO:0006082 organic acid metabolic process; GO:0006575 cellular modified amino acid metabolic process; GO:0006725 cellular aromatic compound metabolic process; GO:0006732 coenzyme metabolic process; GO:0006760 folic acid-containing compound metabolic process; GO:0006807 nitrogen compound metabolic process; GO:0008152 metabolic process; GO:0009058 biosynthetic process; GO:0009108 coenzyme biosynthe…	GO:0005622 intracellular; GO:0005623 cell; GO:0005737 cytoplasm; GO:0005829 cytosol; GO:0044424 intracellular part; GO:0044444 cytoplasmic part; GO:0044464 cell part;	GO:0003824 catalytic activity; GO:0004146 dihydrofolate reductase activity; GO:0004799 thymidylate synthase activity; GO:0008168 methyltransferase activity; GO:0016491 oxidoreductase activity; GO:0016645 oxidoreductase activity, acting on the CH-NH group of donors; GO:0016646 oxidoreductase activity, acting on the CH-NH group of donors, NAD or NADP as acceptor; GO:0016740 transferase activity; GO…	K13998	DHFR-TS; dihydrofolate reductase / thymidylate synthase [EC:1.5.1.3 2.1.1.45]	cann00240 Pyrimidine metabolism; cann00670 One carbon pool by folate; cann00790 Folate biosynthesis; cann01100 Metabolic pathways	PF00186; PF00303	Dihydrofolate reductase; Thymidylate synthase
Capana08g002616	"MATE4_ARATH MATE efflux family protein 4, chloroplastic OS=Arabidopsis thaliana GN=DTX46 PE=2 SV=1"	0.648	Down	0.0064429	DTX46	60.644	6.8	41	2	2	78076	60798	70719	60040	0	57409	42181	48388	45191	0	0	0	60826	58932	62107	84912	82177	64666	27629	30133	0	67974	63703	72709	plasma membrane	GO:0001101 response to acid chemical; GO:0002376 immune system process; GO:0006082 organic acid metabolic process; GO:0006725 cellular aromatic compound metabolic process; GO:0006950 response to stress; GO:0006952 defense response; GO:0006955 immune response; GO:0008152 metabolic process; GO:0009058 biosynthetic process; GO:0009605 response to external stimulus; GO:0009607 response to biotic stim…	GO:0005622 intracellular; GO:0005623 cell; GO:0005737 cytoplasm; GO:0005739 mitochondrion; GO:0009507 chloroplast; GO:0009526 plastid envelope; GO:0009536 plastid; GO:0009941 chloroplast envelope; GO:0031967 organelle envelope; GO:0031975 envelope; GO:0043226 organelle; GO:0043227 membrane-bounded organelle; GO:0043229 intracellular organelle; GO:0043231 intracellular membrane-bounded organelle; …
Capana08g002684	eukaryotic translation initiation factor 4B3	0.66	Down	0.00188391	---	45.301	45.2	122	13	12	207150	208480	193380	175490	182710	176910	126690	126830	148250	270050	268880	263070	210240	179310	196410	173800	175960	160760	193030	198330	183970	282010	286790	317620	nucleus			GO:0003676 nucleic acid binding; GO:0003723 RNA binding; GO:0003729 mRNA binding; GO:0005488 binding; GO:0005515 protein binding; GO:0042802 identical protein binding; GO:0042803 protein homodimerization activity; GO:0046983 protein dimerization activity; GO:0097159 organic cyclic compound binding; GO:1901363 heterocyclic compound binding;
Capana08g002700	GRP2_NICSY Glycine-rich protein 2 OS=Nicotiana sylvestris GN=GRP-2 PE=2 SV=1	0.656	Down	0.0137785	GRP-2	19.166	49	115	5	4	1449900	1306000	1222900	1462400	1409200	1342200	869830	876040	863980	1448000	1476100	1538200	874970	864800	917180	1050600	895090	847600	1135200	1041700	1075000	1359200	1579200	1611000	nucleus	GO:0000003 reproduction; GO:0001101 response to acid chemical; GO:0003006 developmental process involved in reproduction; GO:0006950 response to stress; GO:0006996 organelle organization; GO:0007275 multicellular organism development; GO:0009266 response to temperature stimulus; GO:0009269 response to desiccation; GO:0009409 response to cold; GO:0009414 response to water deprivation; GO:0009415 r…	GO:0005622 intracellular; GO:0005623 cell; GO:0005634 nucleus; GO:0005730 nucleolus; GO:0005737 cytoplasm; GO:0005829 cytosol; GO:0005886 plasma membrane; GO:0016020 membrane; GO:0031974 membrane-enclosed lumen; GO:0031981 nuclear lumen; GO:0043226 organelle; GO:0043227 membrane-bounded organelle; GO:0043228 non-membrane-bounded organelle; GO:0043229 intracellular organelle; GO:0043231 intracellu…	GO:0003676 nucleic acid binding; GO:0003677 DNA binding; GO:0003690 double-stranded DNA binding; GO:0003697 single-stranded DNA binding; GO:0003723 RNA binding; GO:0003729 mRNA binding; GO:0005488 binding; GO:0097159 organic cyclic compound binding; GO:1901363 heterocyclic compound binding;				PF00313; PF00098	'Cold-shock' DNA-binding domain; Zinc knuckle
Capana08g002701	GRP2_NICSY Glycine-rich protein 2 OS=Nicotiana sylvestris GN=GRP-2 PE=2 SV=1	0.461	Down	0.036984	GRP-2	19.416	41.3	62	5	4	184250	95371	195030	259610	204020	248370	78406	75695	65057	162980	281430	368130	215990	222180	215430	253990	158370	221140	272880	198010	251910	641940	542570	581050	nucleus	GO:0000003 reproduction; GO:0001101 response to acid chemical; GO:0003006 developmental process involved in reproduction; GO:0006950 response to stress; GO:0006996 organelle organization; GO:0007275 multicellular organism development; GO:0009266 response to temperature stimulus; GO:0009269 response to desiccation; GO:0009409 response to cold; GO:0009414 response to water deprivation; GO:0009415 r…	GO:0005622 intracellular; GO:0005623 cell; GO:0005634 nucleus; GO:0005730 nucleolus; GO:0005737 cytoplasm; GO:0005829 cytosol; GO:0005886 plasma membrane; GO:0016020 membrane; GO:0031974 membrane-enclosed lumen; GO:0031981 nuclear lumen; GO:0043226 organelle; GO:0043227 membrane-bounded organelle; GO:0043228 non-membrane-bounded organelle; GO:0043229 intracellular organelle; GO:0043231 intracellu…	GO:0003676 nucleic acid binding; GO:0003677 DNA binding; GO:0003690 double-stranded DNA binding; GO:0003697 single-stranded DNA binding; GO:0003723 RNA binding; GO:0003729 mRNA binding; GO:0005488 binding; GO:0097159 organic cyclic compound binding; GO:1901363 heterocyclic compound binding;				PF00313; PF00098	'Cold-shock' DNA-binding domain; Zinc knuckle
Capana08g002722	Senescence domain-containing protein	0.567	Down	0.036122	---	48.346	22	51	6	6	86256	79266	62294	46730	52937	45674	53231	30866	44955	108130	116180	114270	59124	57816	60020	54319	54039	60534	49681	46413	45042	49082	69331	57115	cytoplasm				K19366	SPG20; spartin	cann04144 Endocytosis
Capana08g002736	RAC3_ARATH Rac-like GTP-binding protein ARAC3 OS=Arabidopsis thaliana GN=ARAC3 PE=1 SV=1	0.595	Down	0.048122	ARAC3	21.731	18.2	34	3	3	63509	88967	86961	99381	66649	88405	34556	50153	57841	54494	45129	53091	68028	59191	55810	60515	61842	58283	52200	51948	32772	131480	119420	143400	cytoplasm				K04392	RAC1; Ras-related C3 botulinum toxin substrate 1	cann04145 Phagosome; cann04933 AGE-RAGE signaling pathway in diabetic complications	PF00071	Ras family
Capana08g002739	MSI2_ARATH WD-40 repeat-containing protein MSI2 OS=Arabidopsis thaliana GN=MSI2 PE=2 SV=1	0.511	Down	0.004901	MSI2	45.676	13.4	34	3	3	78482	73645	64224	69868	54736	62001	43353	36981	30107	66971	46933	76043	33066	37560	29878	78203	48609	53626	72658	72959	61851	0	0	0	nucleus		GO:0000151 ubiquitin ligase complex; GO:0005622 intracellular; GO:0005623 cell; GO:0005737 cytoplasm; GO:0005829 cytosol; GO:0031461 cullin-RING ubiquitin ligase complex; GO:0032991 macromolecular complex; GO:0044424 intracellular part; GO:0044444 cytoplasmic part; GO:0044464 cell part; GO:0080008 Cul4-RING E3 ubiquitin ligase complex; GO:1902494 catalytic complex; GO:1990234 transferase complex;		K10752	RBBP4, HAT2, CAF1, MIS16; histone-binding protein RBBP4
Capana08g002740	Heavy metal-associated isoprenylated plant protein 26	0.431	Down	0.028497	---	17.272	28.8	32	3	3	140740	116160	99915	100550	84145	97297	58472	65464	29863	38827	50708	47366	64527	50909	41246	49512	54036	66769	21032	30108	0	0	35053	0	chloroplast	GO:0006810 transport; GO:0006811 ion transport; GO:0006812 cation transport; GO:0006873 cellular ion homeostasis; GO:0006875 cellular metal ion homeostasis; GO:0006950 response to stress; GO:0009266 response to temperature stimulus; GO:0009408 response to heat; GO:0009628 response to abiotic stimulus; GO:0009987 cellular process; GO:0010286 heat acclimation; GO:0019725 cellular homeostasis; GO:00…	GO:0005622 intracellular; GO:0005623 cell; GO:0005737 cytoplasm; GO:0005886 plasma membrane; GO:0005911 cell-cell junction; GO:0009506 plasmodesma; GO:0016020 membrane; GO:0030054 cell junction; GO:0044424 intracellular part; GO:0044464 cell part; GO:0055044 symplast; GO:0071944 cell periphery;	GO:0005488 binding; GO:0005507 copper ion binding; GO:0032791 lead ion binding; GO:0043167 ion binding; GO:0043169 cation binding; GO:0046870 cadmium ion binding; GO:0046872 metal ion binding; GO:0046914 transition metal ion binding;				PF00403	Heavy-metal-associated domain
Capana08g002768	SMT2_ARATH 24-methylenesterol C-methyltransferase 2 OS=Arabidopsis thaliana GN=SMT2 PE=1 SV=2	0.523	Down	2.3847e-05	SMT2	40.212	18.2	44	5	5	118410	111160	107710	118700	110030	100710	57460	59715	59172	56990	66083	66817	91021	91643	86403	66582	73048	71194	70229	59307	76646	116000	106340	114440	cytoplasm	GO:0008152 metabolic process; GO:0032259 methylation;	GO:0005622 intracellular; GO:0005623 cell; GO:0005737 cytoplasm; GO:0044424 intracellular part; GO:0044464 cell part;	GO:0003824 catalytic activity; GO:0008168 methyltransferase activity; GO:0008757 S-adenosylmethionine-dependent methyltransferase activity; GO:0016740 transferase activity; GO:0016741 transferase activity, transferring one-carbon groups;	K08242	E2.1.1.143; 24-methylenesterol C-methyltransferase [EC:2.1.1.143]	cann00100 Steroid biosynthesis; cann01110 Biosynthesis of secondary metabolites	PF08241	Methyltransferase domain
Capana09g000032	"TL16_ARATH Thylakoid lumenal 16.5 kDa protein, chloroplastic OS=Arabidopsis thaliana GN=At4g02530 PE=1 SV=3"	1.96	Up	0.045296	At4g02530	14.472	62.9	80	7	7	534600	829720	1279700	971810	1157900	890270	1763500	1829400	1592200	1870800	1904400	1851600	1257900	1208700	1185000	823210	1235600	1238600	1601700	1753200	1725400	2969600	2313600	2248200	nucleus	GO:0006091 generation of precursor metabolites and energy; GO:0006807 nitrogen compound metabolic process; GO:0008152 metabolic process; GO:0009719 response to endogenous stimulus; GO:0009725 response to hormone; GO:0009735 response to cytokinin; GO:0009765 photosynthesis, light harvesting; GO:0009987 cellular process; GO:0010033 response to organic substance; GO:0010206 photosystem II repair; GO…	GO:0005622 intracellular; GO:0005623 cell; GO:0005737 cytoplasm; GO:0009507 chloroplast; GO:0009526 plastid envelope; GO:0009532 plastid stroma; GO:0009534 chloroplast thylakoid; GO:0009535 chloroplast thylakoid membrane; GO:0009536 plastid; GO:0009543 chloroplast thylakoid lumen; GO:0009570 chloroplast stroma; GO:0009579 thylakoid; GO:0009941 chloroplast envelope; GO:0016020 membrane; GO:0031967…
Capana09g000037	FAZ1_TRYB2 Flagellar attachment zone protein 1 OS=Trypanosoma brucei brucei (strain 927/4 GUTat10.1) GN=FAZ1 PE=4 SV=1	2.12	Up	0.00662	FAZ1	55.052	30.3	27	8	8	14321	0	16027	0	0	0	27524	33062	36011	44540	58130	32994	15874	15191	0	41761	25925	18188	101960	105100	117670	0	0	8029.6	cytoskeleton
Capana09g000053	VATH_ARATH V-type proton ATPase subunit H OS=Arabidopsis thaliana GN=VHA-H PE=2 SV=1	0.594	Down	0.0064832	VHA-H	19.831	11.4	30	1	1	37442	30440	34656	33385	33623	34318	17339	22843	20726	14698	10868	17900	22182	0	0	28253	22291	20580	15006	16298	16227	0	0	0	chloroplast	GO:0006810 transport; GO:0006811 ion transport; GO:0006812 cation transport; GO:0006873 cellular ion homeostasis; GO:0006885 regulation of pH; GO:0007035 vacuolar acidification; GO:0009987 cellular process; GO:0015672 monovalent inorganic cation transport; GO:0019725 cellular homeostasis; GO:0030003 cellular cation homeostasis; GO:0030004 cellular monovalent inorganic cation homeostasis; GO:00306…	GO:0000221 vacuolar proton-transporting V-type ATPase, V1 domain; GO:0000325 plant-type vacuole; GO:0005622 intracellular; GO:0005623 cell; GO:0005737 cytoplasm; GO:0005773 vacuole; GO:0005774 vacuolar membrane; GO:0005794 Golgi apparatus; GO:0005886 plasma membrane; GO:0009507 chloroplast; GO:0009536 plastid; GO:0012505 endomembrane system; GO:0016020 membrane; GO:0016469 proton-transporting two…	GO:0003824 catalytic activity; GO:0005215 transporter activity; GO:0008324 cation transmembrane transporter activity; GO:0015075 ion transmembrane transporter activity; GO:0015077 monovalent inorganic cation transmembrane transporter activity; GO:0015078 hydrogen ion transmembrane transporter activity; GO:0015318 inorganic solute uptake transmembrane transporter activity; GO:0015399 primary activ…	K02144	ATPeV1H; V-type H+-transporting ATPase subunit H	cann00190 Oxidative phosphorylation; cann01100 Metabolic pathways; cann04145 Phagosome
Capana09g000087	RL74_ARATH 60S ribosomal protein L7-4 OS=Arabidopsis thaliana GN=RPL7D PE=2 SV=1	0.635	Down	0.00124448	RPL7D	30.556	45.1	45	10	3	487430	535620	460780	457830	440390	429040	307000	335250	299160	71085	356280	473510	0	0	392490	448570	424080	407810	444370	377630	366430	196420	205720	197740	chloroplast	GO:0000463 maturation of LSU-rRNA from tricistronic rRNA transcript (SSU-rRNA, 5.8S rRNA, LSU-rRNA); GO:0000470 maturation of LSU-rRNA; GO:0002181 cytoplasmic translation; GO:0006139 nucleobase-containing compound metabolic process; GO:0006364 rRNA processing; GO:0006396 RNA processing; GO:0006412 translation; GO:0006518 peptide metabolic process; GO:0006725 cellular aromatic compound metabolic p…	GO:0005618 cell wall; GO:0005622 intracellular; GO:0005623 cell; GO:0005737 cytoplasm; GO:0005773 vacuole; GO:0005774 vacuolar membrane; GO:0005829 cytosol; GO:0005840 ribosome; GO:0005844 polysome; GO:0005886 plasma membrane; GO:0009507 chloroplast; GO:0009536 plastid; GO:0015934 large ribosomal subunit; GO:0016020 membrane; GO:0022625 cytosolic large ribosomal subunit; GO:0022626 cytosolic ribo…	GO:0003676 nucleic acid binding; GO:0003723 RNA binding; GO:0003729 mRNA binding; GO:0003735 structural constituent of ribosome; GO:0005198 structural molecule activity; GO:0005488 binding; GO:0097159 organic cyclic compound binding; GO:1901363 heterocyclic compound binding;	K02937	RP-L7e, RPL7; large subunit ribosomal protein L7e	cann03010 Ribosome	PF08079; PF00327	Ribosomal L30 N-terminal domain; Ribosomal protein L30p/L7e
Capana09g000122	Y464_SYNE7 UPF0133 protein Synpcc7942_0464 OS=Synechococcus elongatus (strain PCC 7942) GN=Synpcc7942_0464 PE=3 SV=2	1.509	Up	0.0058371	Synpcc7942_0464	17.42	49.7	160	7	7	1605800	1973400	1987800	2119600	2172600	2215300	2928900	2623100	2847200	3094400	3031500	3109000	2093800	1904900	2097900	2032100	2246100	2398500	2869300	2970000	3314700	3255500	3154800	3119200	chloroplast	GO:0006605 protein targeting; GO:0006810 transport; GO:0006886 intracellular protein transport; GO:0008104 protein localization; GO:0015031 protein transport; GO:0015833 peptide transport; GO:0017038 protein import; GO:0033036 macromolecule localization; GO:0033365 protein localization to organelle; GO:0034613 cellular protein localization; GO:0042886 amide transport; GO:0045036 protein targeting…	GO:0005622 intracellular; GO:0005623 cell; GO:0005737 cytoplasm; GO:0009507 chloroplast; GO:0009526 plastid envelope; GO:0009532 plastid stroma; GO:0009534 chloroplast thylakoid; GO:0009535 chloroplast thylakoid membrane; GO:0009536 plastid; GO:0009570 chloroplast stroma; GO:0009579 thylakoid; GO:0009941 chloroplast envelope; GO:0016020 membrane; GO:0031967 organelle envelope; GO:0031975 envelope…
Capana09g000192	"E1313_ARATH Glucan endo-1,3-beta-glucosidase 13 OS=Arabidopsis thaliana GN=At5g56590 PE=1 SV=1"	0.583	Down	0.013862	At5g56590	63.473	12.5	54	5	5	109910	98402	104580	105960	117790	118490	60878	73985	47367	75701	71061	98349	97116	102250	83434	119640	112950	92690	97707	95404	88149	62562	80128	94757	chloroplast		GO:0005623 cell; GO:0005886 plasma membrane; GO:0016020 membrane; GO:0031224 intrinsic component of membrane; GO:0031225 anchored component of membrane; GO:0031226 intrinsic component of plasma membrane; GO:0044425 membrane part; GO:0044459 plasma membrane part; GO:0044464 cell part; GO:0046658 anchored component of plasma membrane; GO:0071944 cell periphery;	GO:0001871 pattern binding; GO:0003824 catalytic activity; GO:0004553 hydrolase activity, hydrolyzing O-glycosyl compounds; GO:0005488 binding; GO:0016787 hydrolase activity; GO:0016798 hydrolase activity, acting on glycosyl bonds; GO:0030246 carbohydrate binding; GO:0030247 polysaccharide binding;				PF00332; PF07983	Glycosyl hydrolases family 17; X8 domain
Capana09g000419	NU205_HUMAN Nuclear pore complex protein Nup205 OS=Homo sapiens GN=NUP205 PE=1 SV=3	2.181	Up	0.0041562	NUP205	103.34	14.8	66	9	9	89474	57238	69209	65820	60174	57839	155190	168030	147820	99682	111820	96543	47384	57862	66964	118720	126610	129370	164370	167460	179550	0	34164	36909	plasma membrane	GO:0006810 transport; GO:0006913 nucleocytoplasmic transport; GO:0006996 organelle organization; GO:0006997 nucleus organization; GO:0006999 nuclear pore organization; GO:0009987 cellular process; GO:0016043 cellular component organization; GO:0043933 macromolecular complex subunit organization; GO:0046907 intracellular transport; GO:0051169 nuclear transport; GO:0051179 localization; GO:0051234 …	GO:0005622 intracellular; GO:0005623 cell; GO:0005634 nucleus; GO:0005635 nuclear envelope; GO:0005643 nuclear pore; GO:0005737 cytoplasm; GO:0009507 chloroplast; GO:0009536 plastid; GO:0012505 endomembrane system; GO:0031967 organelle envelope; GO:0031975 envelope; GO:0032991 macromolecular complex; GO:0043226 organelle; GO:0043227 membrane-bounded organelle; GO:0043229 intracellular organelle; …	GO:0005198 structural molecule activity; GO:0017056 structural constituent of nuclear pore;	K14310	NUP205, NUP192; nuclear pore complex protein Nup205	cann03013 RNA transport
Capana09g000751	ENL2_ARATH Early nodulin-like protein 2 OS=Arabidopsis thaliana GN=At4g27520 PE=1 SV=1	1.587	Up	0.0165966	At4g27520	32.637	24.6	88	7	7	289610	353640	419690	355170	381970	388970	584710	506600	594590	631920	646100	542330	488410	491060	551630	527940	643050	600320	625540	781260	870150	1525400	1217100	1280900	nucleus							PF02298	Plastocyanin-like domain
Capana09g000825	FERON_ARATH Receptor-like protein kinase FERONIA OS=Arabidopsis thaliana GN=FER PE=1 SV=1	0.66	Down	0.00190385	FER	96.705	20.9	90	11	10	211800	225180	200820	209510	216220	194420	129940	138620	152680	130790	129070	128380	185740	197520	190130	151260	186500	163210	161380	146670	137540	41257	65874	85515	plasma membrane	GO:0000003 reproduction; GO:0001558 regulation of cell growth; GO:0006464 cellular protein modification process; GO:0006468 protein phosphorylation; GO:0006793 phosphorus metabolic process; GO:0006796 phosphate-containing compound metabolic process; GO:0006807 nitrogen compound metabolic process; GO:0006950 response to stress; GO:0006952 defense response; GO:0007275 multicellular organism develop…	GO:0005618 cell wall; GO:0005623 cell; GO:0005886 plasma membrane; GO:0005911 cell-cell junction; GO:0009506 plasmodesma; GO:0016020 membrane; GO:0030054 cell junction; GO:0030312 external encapsulating structure; GO:0043680 filiform apparatus; GO:0044426 cell wall part; GO:0044462 external encapsulating structure part; GO:0044464 cell part; GO:0055044 symplast; GO:0071944 cell periphery;	GO:0003824 catalytic activity; GO:0004672 protein kinase activity; GO:0016301 kinase activity; GO:0016740 transferase activity; GO:0016772 transferase activity, transferring phosphorus-containing groups; GO:0016773 phosphotransferase activity, alcohol group as acceptor;				PF12819; PF07714	Carbohydrate-binding protein of the ER; Protein tyrosine kinase
Capana09g001032	TSJT1_TOBAC Stem-specific protein TSJT1 OS=Nicotiana tabacum GN=TSJT1 PE=2 SV=1	0.529	Down	0.029239	TSJT1	28.027	14.2	21	3	3	79978	75042	56087	0	100590	52474	41001	0	33401	42127	50149	67993	43792	0	36618	0	0	36827	29487	18084	30566	44864	0	45036	chloroplast							PF12481	Aluminium induced protein
Capana09g001304	IMB1_MOUSE Importin subunit beta-1 OS=Mus musculus GN=Kpnb1 PE=1 SV=2	0.6	Down	0.0165445	Kpnb1	96.608	23.9	67	13	13	352770	301470	376010	319800	345590	379890	207830	207480	203240	460720	286370	246650	219440	138220	199120	283220	310830	298030	370400	405990	388080	105210	139990	88413	chloroplast	GO:0000060 protein import into nucleus, translocation; GO:0000070 mitotic sister chromatid segregation; GO:0000226 microtubule cytoskeleton organization; GO:0000278 mitotic cell cycle; GO:0000280 nuclear division; GO:0000819 sister chromatid segregation; GO:0006606 protein import into nucleus; GO:0006607 NLS-bearing protein import into nucleus; GO:0006610 ribosomal protein import into nucleus; GO…	GO:0005622 intracellular; GO:0005623 cell; GO:0005634 nucleus; GO:0005635 nuclear envelope; GO:0005643 nuclear pore; GO:0005654 nucleoplasm; GO:0005737 cytoplasm; GO:0005783 endoplasmic reticulum; GO:0005829 cytosol; GO:0010494 cytoplasmic stress granule; GO:0012505 endomembrane system; GO:0016020 membrane; GO:0031090 organelle membrane; GO:0031965 nuclear membrane; GO:0031967 organelle envelope;…	GO:0005048 signal sequence binding; GO:0005215 transporter activity; GO:0005488 binding; GO:0005515 protein binding; GO:0008092 cytoskeletal protein binding; GO:0008139 nuclear localization sequence binding; GO:0008565 protein transporter activity; GO:0019894 kinesin binding; GO:0019899 enzyme binding; GO:0019904 protein domain specific binding; GO:0031072 heat shock protein binding; GO:0033218 a…	K14293	KPNB1, IPO1; importin subunit beta-1	cann03013 RNA transport
Capana09g001745	USPAL_ARATH Universal stress protein A-like protein OS=Arabidopsis thaliana GN=At3g01520 PE=1 SV=2	0.576	Down	0.0020183	At3g01520	18.525	40.2	50	4	3	183140	210400	212680	169740	185850	167800	127720	103650	117460	223080	232630	244310	159490	149340	150030	129250	149370	92426	110620	107530	309530	143830	127650	174280	cytoplasm							PF00582	Universal stress protein family
Capana09g001750	USPAL_ARATH Universal stress protein A-like protein OS=Arabidopsis thaliana GN=At3g01520 PE=1 SV=2	0.588	Down	0.0160964	At3g01520	18.56	36	19	4	3	67332	51355	75993	67177	90385	60776	34273	37908	42235	100870	81358	97403	64874	45002	51653	34178	40769	37323	40515	54037	33957	68151	73716	54412	cytoplasm							PF00582	Universal stress protein family
Capana09g001791	"CAHC_PEA Carbonic anhydrase, chloroplastic OS=Pisum sativum PE=1 SV=1"	0.62	Down	0.033845	---	40.088	19.5	32	4	4	73775	88964	82096	63020	63517	72768	54243	60295	37172	49361	64329	57591	96168	82166	93419	92629	71074	97597	89216	77945	75006	93569	116710	121750	chloroplast		GO:0005622 intracellular; GO:0005623 cell; GO:0005737 cytoplasm; GO:0009507 chloroplast; GO:0009536 plastid; GO:0043226 organelle; GO:0043227 membrane-bounded organelle; GO:0043229 intracellular organelle; GO:0043231 intracellular membrane-bounded organelle; GO:0044424 intracellular part; GO:0044444 cytoplasmic part; GO:0044464 cell part;		K01673	cynT, can; carbonic anhydrase [EC:4.2.1.1]	cann00910 Nitrogen metabolism; cann01100 Metabolic pathways	PF00484	Carbonic anhydrase
Capana09g001817	RN2H_SYNY3 Uncharacterized ribonuclease sll1290 OS=Synechocystis sp. (strain PCC 6803 / Kazusa) GN=sll1290 PE=3 SV=1	1.638	Up	0.0123778	sll1290	67.42	11.9	40	5	5	75073	85566	58100	62126	66747	55854	121750	123560	113150	97629	90245	87870	29489	41574	43669	61307	51958	57635	90605	92535	95600	0	0	0	cytoplasm	GO:0006139 nucleobase-containing compound metabolic process; GO:0006364 rRNA processing; GO:0006396 RNA processing; GO:0006401 RNA catabolic process; GO:0006725 cellular aromatic compound metabolic process; GO:0006807 nitrogen compound metabolic process; GO:0006996 organelle organization; GO:0008152 metabolic process; GO:0009056 catabolic process; GO:0009057 macromolecule catabolic process; GO:00…	GO:0000178 exosome (RNase complex); GO:0000932 P-body; GO:0005622 intracellular; GO:0005623 cell; GO:0005737 cytoplasm; GO:0005739 mitochondrion; GO:0009507 chloroplast; GO:0009536 plastid; GO:0032991 macromolecular complex; GO:0035770 ribonucleoprotein granule; GO:0036464 cytoplasmic ribonucleoprotein granule; GO:0043226 organelle; GO:0043227 membrane-bounded organelle; GO:0043228 non-membrane-b…	GO:0000175 3'-5'-exoribonuclease activity; GO:0003824 catalytic activity; GO:0004518 nuclease activity; GO:0004527 exonuclease activity; GO:0004532 exoribonuclease activity; GO:0004540 ribonuclease activity; GO:0008408 3'-5' exonuclease activity; GO:0016787 hydrolase activity; GO:0016788 hydrolase activity, acting on ester bonds; GO:0016796 exonuclease activity, active with either ribo- or deoxyr…	K01147	rnb; exoribonuclease II [EC:3.1.13.1]		PF00773	RNB domain
Capana09g001896	Putative ovule protein	0.537	Down	0.0116821	---	24.603	22.3	46	3	3	146330	162200	148280	140390	126050	132580	71779	67263	106120	80723	79456	70528	86741	116630	120080	110190	128490	106740	75101	113410	90759	148310	177750	159760	mitochondria
Capana09g002174	FLS_SOLTU Flavonol synthase/flavanone 3-hydroxylase OS=Solanum tuberosum PE=2 SV=1	0.586	Down	0.046318	---	20.374	21	21	2	2	23734	24520	20094	21416	22404	22395	10744	0	15966	0	0	16650	0	15104	0	21113	18905	21795	19798	18297	17931	22534	29594	31229	cytoplasm		GO:0005622 intracellular; GO:0005623 cell; GO:0005737 cytoplasm; GO:0044424 intracellular part; GO:0044464 cell part;		K05278	FLS; flavonol synthase [EC:1.14.11.23]	cann00941 Flavonoid biosynthesis; cann01100 Metabolic pathways; cann01110 Biosynthesis of secondary metabolites
Capana09g002199	PAL5_SOLLC Phenylalanine ammonia-lyase OS=Solanum lycopersicum GN=PAL5 PE=3 SV=1	0.405	Down	0.00061873	PAL5	78.361	42.1	164	21	2	446460	345100	356990	451240	432120	437680	142730	156020	165960	254320	255900	271440	302190	309680	326200	481280	445350	455460	376680	360020	391220	1075800	1166300	1153500	chloroplast	GO:0001101 response to acid chemical; GO:0006464 cellular protein modification process; GO:0006508 proteolysis; GO:0006511 ubiquitin-dependent protein catabolic process; GO:0006725 cellular aromatic compound metabolic process; GO:0006807 nitrogen compound metabolic process; GO:0008152 metabolic process; GO:0009056 catabolic process; GO:0009057 macromolecule catabolic process; GO:0009058 biosynthe…		GO:0003824 catalytic activity; GO:0016829 lyase activity; GO:0016840 carbon-nitrogen lyase activity; GO:0016841 ammonia-lyase activity; GO:0045548 phenylalanine ammonia-lyase activity;	K10775	PAL; phenylalanine ammonia-lyase [EC:4.3.1.24]	cann00360 Phenylalanine metabolism; cann00940 Phenylpropanoid biosynthesis; cann01100 Metabolic pathways; cann01110 Biosynthesis of secondary metabolites
Capana09g002238	METK3_SOLLC S-adenosylmethionine synthase 3 OS=Solanum lycopersicum GN=SAM3 PE=2 SV=1	0.636	Down	0.000100932	SAM3	42.626	74.1	169	20	5	2860100	2721500	2595900	2624800	2528800	2499700	1717300	1764400	1722300	2398900	2398100	2395900	1987400	1932000	2024900	2043400	2008100	1940000	2033800	1990800	1954200	2606300	2738400	2704500	cytoskeleton		GO:0005622 intracellular; GO:0005623 cell; GO:0005737 cytoplasm; GO:0005829 cytosol; GO:0044424 intracellular part; GO:0044444 cytoplasmic part; GO:0044464 cell part;	GO:0003824 catalytic activity; GO:0004478 methionine adenosyltransferase activity; GO:0016740 transferase activity; GO:0016765 transferase activity, transferring alkyl or aryl (other than methyl) groups;	K00789	metK; S-adenosylmethionine synthetase [EC:2.5.1.6]	cann00270 Cysteine and methionine metabolism; cann01100 Metabolic pathways; cann01110 Biosynthesis of secondary metabolites; cann01230 Biosynthesis of amino acids	PF00438; PF02772; PF02773	S-adenosylmethionine synthetase, N-terminal domain; S-adenosylmethionine synthetase, central domain; S-adenosylmethionine synthetase, C-terminal domain
Capana09g002265	SF3A2_HUMAN Splicing factor 3A subunit 2 OS=Homo sapiens GN=SF3A2 PE=1 SV=2	0.631	Down	0.00082008	SF3A2	38.007	21.7	65	5	5	486870	481500	453550	456920	498300	521070	326720	281600	289530	607290	549670	551190	564200	455310	455890	612880	472230	483780	631430	559060	551660	635160	640250	711710	nucleus	GO:0000245 spliceosomal complex assembly; GO:0000375 RNA splicing, via transesterification reactions; GO:0000377 RNA splicing, via transesterification reactions with bulged adenosine as nucleophile; GO:0000398 mRNA splicing, via spliceosome; GO:0006139 nucleobase-containing compound metabolic process; GO:0006396 RNA processing; GO:0006397 mRNA processing; GO:0006725 cellular aromatic compound met…	GO:0005622 intracellular; GO:0005623 cell; GO:0005634 nucleus; GO:0005654 nucleoplasm; GO:0005681 spliceosomal complex; GO:0005684 U2-type spliceosomal complex; GO:0005686 U2 snRNP; GO:0016604 nuclear body; GO:0016607 nuclear speck; GO:0030532 small nuclear ribonucleoprotein complex; GO:0031974 membrane-enclosed lumen; GO:0031981 nuclear lumen; GO:0032991 macromolecular complex; GO:0043226 organe…	GO:0003676 nucleic acid binding; GO:0003723 RNA binding; GO:0005488 binding; GO:0097159 organic cyclic compound binding; GO:1901363 heterocyclic compound binding;	K12826	SF3A2, SAP62; splicing factor 3A subunit 2	cann03040 Spliceosome	PF12874	Zinc-finger of C2H2 type
Capana09g002381	LSM7_DICDI Probable U6 snRNA-associated Sm-like protein LSm7 OS=Dictyostelium discoideum GN=lsm7 PE=3 SV=1	0.57	Down	0.0030953	lsm7	18.732	30.8	62	3	3	146100	136790	117340	130410	115720	111820	83366	67914	76888	151080	194160	195260	175940	120660	111310	130380	130630	118940	154220	132630	138240	156220	136700	187450	cytoplasm	GO:0006139 nucleobase-containing compound metabolic process; GO:0006396 RNA processing; GO:0006725 cellular aromatic compound metabolic process; GO:0006807 nitrogen compound metabolic process; GO:0008152 metabolic process; GO:0009987 cellular process; GO:0010467 gene expression; GO:0016070 RNA metabolic process; GO:0034641 cellular nitrogen compound metabolic process; GO:0043170 macromolecule met…	GO:0005622 intracellular; GO:0005623 cell; GO:0005634 nucleus; GO:0005681 spliceosomal complex; GO:0005684 U2-type spliceosomal complex; GO:0005688 U6 snRNP; GO:0005689 U12-type spliceosomal complex; GO:0030532 small nuclear ribonucleoprotein complex; GO:0032991 macromolecular complex; GO:0043226 organelle; GO:0043227 membrane-bounded organelle; GO:0043229 intracellular organelle; GO:0043231 intr…		K12626	LSM7; U6 snRNA-associated Sm-like protein LSm7	cann03018 RNA degradation; cann03040 Spliceosome	PF01423	LSM domain
Capana10g000070	"TRXM_BRANA Thioredoxin M-type, chloroplastic OS=Brassica napus PE=1 SV=1"	1.942	Up	0.00047548	---	18.92	36.2	51	5	3	202550	219790	196130	229730	239080	263070	394650	366180	440650	642550	624430	586100	546680	631170	633930	690690	730190	695590	569720	776970	668600	1570100	1284600	1283100	chloroplast				K03671	trxA; thioredoxin 1		PF00085	Thioredoxin
Capana10g000086	Putative ovule protein	1.784	Up	0.0107959	---	32.696	16.8	35	4	4	71936	83269	97737	178110	149100	135030	124000	161120	165950	171230	170290	103380	230990	191170	140970	269720	207760	175450	157220	165110	147350	210930	190590	258450	mitochondria
Capana10g000176	FLA1_ARATH Fasciclin-like arabinogalactan protein 1 OS=Arabidopsis thaliana GN=FLA1 PE=1 SV=1	1.508	Up	0.0075772	FLA1	44.317	37.6	102	9	9	405070	350450	319880	389130	383660	375470	495560	544250	581980	575620	561210	573730	241100	277330	284080	390180	384380	343620	633910	574510	499430	678610	634920	698240	plasma membrane	GO:0007275 multicellular organism development; GO:0022622 root system development; GO:0032501 multicellular organismal process; GO:0032502 developmental process; GO:0048364 root development; GO:0048367 shoot system development; GO:0048731 system development; GO:0048856 anatomical structure development; GO:0099402 plant organ development;	GO:0005618 cell wall; GO:0005623 cell; GO:0005886 plasma membrane; GO:0016020 membrane; GO:0030312 external encapsulating structure; GO:0031224 intrinsic component of membrane; GO:0031225 anchored component of membrane; GO:0031226 intrinsic component of plasma membrane; GO:0044425 membrane part; GO:0044459 plasma membrane part; GO:0044464 cell part; GO:0046658 anchored component of plasma membran…					PF02469	Fasciclin domain
Capana10g000224	G3P_HOMAM Glyceraldehyde-3-phosphate dehydrogenase OS=Homarus americanus PE=1 SV=2	0.628	Down	3.7311e-06	---	39.922	33.9	122	8	8	256020	261580	254350	235700	240620	242220	165830	160790	158490	281710	289500	266520	244040	248460	233020	238220	250520	226470	202420	189110	201740	362100	351020	367730	chloroplast	GO:0000003 reproduction; GO:0003006 developmental process involved in reproduction; GO:0005975 carbohydrate metabolic process; GO:0007275 multicellular organism development; GO:0008152 metabolic process; GO:0009555 pollen development; GO:0009719 response to endogenous stimulus; GO:0009725 response to hormone; GO:0009735 response to cytokinin; GO:0009791 post-embryonic development; GO:0009908 flow…	GO:0005622 intracellular; GO:0005623 cell; GO:0005737 cytoplasm; GO:0009536 plastid; GO:0016020 membrane; GO:0043226 organelle; GO:0043227 membrane-bounded organelle; GO:0043229 intracellular organelle; GO:0043231 intracellular membrane-bounded organelle; GO:0044424 intracellular part; GO:0044444 cytoplasmic part; GO:0044464 cell part;	GO:0003824 catalytic activity; GO:0004365 glyceraldehyde-3-phosphate dehydrogenase (NAD+) (phosphorylating) activity; GO:0005488 binding; GO:0005507 copper ion binding; GO:0008270 zinc ion binding; GO:0016491 oxidoreductase activity; GO:0016620 oxidoreductase activity, acting on the aldehyde or oxo group of donors, NAD or NADP as acceptor; GO:0016903 oxidoreductase activity, acting on the aldehyd…	K00134	GAPDH, gapA; glyceraldehyde 3-phosphate dehydrogenase [EC:1.2.1.12]	cann00010 Glycolysis / Gluconeogenesis; cann00710 Carbon fixation in photosynthetic organisms; cann01100 Metabolic pathways; cann01110 Biosynthesis of secondary metabolites; cann01200 Carbon metabolism; cann01230 Biosynthesis of amino acids	PF00044; PF02800	Glyceraldehyde 3-phosphate dehydrogenase, NAD binding domain; Glyceraldehyde 3-phosphate dehydrogenase, C-terminal domain
Capana10g000336	tyrosine aminotransferase-like isoform X1	0.597	Down	0.00023742	---	14.914	11.4	31	1	1	78125	85144	74877	78343	57389	41454	45969	47653	48476	87888	90725	77656	58814	41039	53651	74194	66716	56461	53429	0	50694	74108	93770	74992	cytoplasm		GO:0005622 intracellular; GO:0005623 cell; GO:0005737 cytoplasm; GO:0005829 cytosol; GO:0044424 intracellular part; GO:0044444 cytoplasmic part; GO:0044464 cell part;	GO:0003676 nucleic acid binding; GO:0003723 RNA binding; GO:0003729 mRNA binding; GO:0005488 binding; GO:0097159 organic cyclic compound binding; GO:1901363 heterocyclic compound binding;	K07466	RFA1, RPA1, rpa; replication factor A1	cann03030 DNA replication; cann03420 Nucleotide excision repair; cann03430 Mismatch repair; cann03440 Homologous recombination
Capana10g000466	LOXH1_MOUSE Lipoxygenase homology domain-containing protein 1 OS=Mus musculus GN=Loxhd1 PE=2 SV=1	0.535	Down	0.0150769	Loxhd1	20.358	31.5	64	4	3	210460	143630	184970	215930	155700	173130	79328	113590	95838	202790	210480	198800	173790	171070	184950	197700	153700	169170	153650	163120	161280	424400	487300	396030	extracellular	GO:0001101 response to acid chemical; GO:0006950 response to stress; GO:0006970 response to osmotic stress; GO:0009266 response to temperature stimulus; GO:0009409 response to cold; GO:0009414 response to water deprivation; GO:0009415 response to water; GO:0009628 response to abiotic stimulus; GO:0009651 response to salt stress; GO:0010035 response to inorganic substance; GO:0042221 response to c…	GO:0005622 intracellular; GO:0005623 cell; GO:0005737 cytoplasm; GO:0005773 vacuole; GO:0005774 vacuolar membrane; GO:0005783 endoplasmic reticulum; GO:0005886 plasma membrane; GO:0009507 chloroplast; GO:0009534 chloroplast thylakoid; GO:0009535 chloroplast thylakoid membrane; GO:0009536 plastid; GO:0009579 thylakoid; GO:0012505 endomembrane system; GO:0016020 membrane; GO:0031090 organelle membr…					PF01477	PLAT/LH2 domain
Capana10g000467	LOXH1_MOUSE Lipoxygenase homology domain-containing protein 1 OS=Mus musculus GN=Loxhd1 PE=2 SV=1	0.577	Down	0.0025191	Loxhd1	20.734	35.9	68	5	5	80874	83247	72088	91030	99886	93815	39871	50481	45954	112700	126150	118800	313630	322980	311830	241420	232340	229670	209530	215890	216920	418440	418730	429060	extracellular	GO:0001101 response to acid chemical; GO:0006950 response to stress; GO:0006970 response to osmotic stress; GO:0009266 response to temperature stimulus; GO:0009409 response to cold; GO:0009414 response to water deprivation; GO:0009415 response to water; GO:0009628 response to abiotic stimulus; GO:0009651 response to salt stress; GO:0010035 response to inorganic substance; GO:0042221 response to c…	GO:0005622 intracellular; GO:0005623 cell; GO:0005737 cytoplasm; GO:0005773 vacuole; GO:0005774 vacuolar membrane; GO:0005783 endoplasmic reticulum; GO:0005886 plasma membrane; GO:0009507 chloroplast; GO:0009534 chloroplast thylakoid; GO:0009535 chloroplast thylakoid membrane; GO:0009536 plastid; GO:0009579 thylakoid; GO:0012505 endomembrane system; GO:0016020 membrane; GO:0031090 organelle membr…					PF01477	PLAT/LH2 domain
Capana10g000527	"TPT_SOLTU Triose phosphate/phosphate translocator, chloroplastic OS=Solanum tuberosum GN=TPT PE=2 SV=1"	1.661	Up	5.7678e-05	TPT	45.527	13.1	62	4	4	616810	603580	615590	684150	698500	789590	1053800	963640	1033000	890570	915010	906950	475530	447590	475320	564190	576010	600090	731800	812890	879360	1361100	1427400	1406300	chloroplast		GO:0005622 intracellular; GO:0005623 cell; GO:0005737 cytoplasm; GO:0009507 chloroplast; GO:0009526 plastid envelope; GO:0009536 plastid; GO:0009941 chloroplast envelope; GO:0016020 membrane; GO:0031090 organelle membrane; GO:0031967 organelle envelope; GO:0031969 chloroplast membrane; GO:0031975 envelope; GO:0042170 plastid membrane; GO:0043226 organelle; GO:0043227 membrane-bounded organelle; G…		K15283	SLC35E1; solute carrier family 35, member E1
Capana10g001182	HNRPQ_RAT Heterogeneous nuclear ribonucleoprotein Q OS=Rattus norvegicus GN=Syncrip PE=2 SV=1	1.612	Up	0.0046446	Syncrip	88.162	22.8	87	12	10	140270	142170	134590	158630	140550	144740	204540	206040	261710	109330	95031	102210	174860	149080	172110	191220	187400	193160	288390	310360	287710	152880	168370	176620	nucleus	GO:0006417 regulation of translation; GO:0007623 circadian rhythm; GO:0009889 regulation of biosynthetic process; GO:0009891 positive regulation of biosynthetic process; GO:0009892 negative regulation of metabolic process; GO:0009893 positive regulation of metabolic process; GO:0010468 regulation of gene expression; GO:0010556 regulation of macromolecule biosynthetic process; GO:0010557 positive …	GO:0005622 intracellular; GO:0005623 cell; GO:0005634 nucleus; GO:0005737 cytoplasm; GO:0016020 membrane; GO:0030425 dendrite; GO:0032991 macromolecular complex; GO:0036477 somatodendritic compartment; GO:0042995 cell projection; GO:0043005 neuron projection; GO:0043025 neuronal cell body; GO:0043226 organelle; GO:0043227 membrane-bounded organelle; GO:0043229 intracellular organelle; GO:0043231 …	GO:0003676 nucleic acid binding; GO:0003723 RNA binding; GO:0003729 mRNA binding; GO:0003730 mRNA 3'-UTR binding; GO:0005488 binding; GO:0048027 mRNA 5'-UTR binding; GO:0097159 organic cyclic compound binding; GO:1901363 heterocyclic compound binding;				PF00076	RNA recognition motif. (a.k.a. RRM, RBD, or RNP domain)
Capana10g001251	"AAT1_ARATH Aspartate aminotransferase, mitochondrial OS=Arabidopsis thaliana GN=ASP1 PE=1 SV=1"	0.581	Down	0.029923	ASP1	48.008	11.6	18	3	2	25563	0	23430	27647	0	0	15440	0	12991	0	0	12429	22942	15694	14440	0	0	15957	9441.9	11866	0	25184	21771	23379	mitochondria	GO:0006082 organic acid metabolic process; GO:0006103 2-oxoglutarate metabolic process; GO:0006520 cellular amino acid metabolic process; GO:0006531 aspartate metabolic process; GO:0006536 glutamate metabolic process; GO:0006807 nitrogen compound metabolic process; GO:0008152 metabolic process; GO:0009064 glutamine family amino acid metabolic process; GO:0009066 aspartate family amino acid metabo…	GO:0005622 intracellular; GO:0005623 cell; GO:0005737 cytoplasm; GO:0005739 mitochondrion; GO:0043226 organelle; GO:0043227 membrane-bounded organelle; GO:0043229 intracellular organelle; GO:0043231 intracellular membrane-bounded organelle; GO:0044424 intracellular part; GO:0044444 cytoplasmic part; GO:0044464 cell part;	GO:0003824 catalytic activity; GO:0004069 L-aspartate:2-oxoglutarate aminotransferase activity; GO:0005488 binding; GO:0005507 copper ion binding; GO:0008483 transaminase activity; GO:0016740 transferase activity; GO:0016769 transferase activity, transferring nitrogenous groups; GO:0043167 ion binding; GO:0043169 cation binding; GO:0046872 metal ion binding; GO:0046914 transition metal ion bindin…	K14455	GOT2; aspartate aminotransferase, mitochondrial [EC:2.6.1.1]	cann00220 Arginine biosynthesis; cann00250 Alanine, aspartate and glutamate metabolism; cann00270 Cysteine and methionine metabolism; cann00330 Arginine and proline metabolism; cann00350 Tyrosine metabolism; cann00360 Phenylalanine metabolism; cann00400 Phenylalanine, tyrosine and tryptophan biosynthesis; cann00710 Carbon fixation in photosynthetic organisms; cann00950 Isoquinoline alkaloid biosy…	PF00155	Aminotransferase class I and II
Capana10g001888	AB4F_ARATH ABC transporter F family member 4 OS=Arabidopsis thaliana GN=ABCF4 PE=2 SV=1	1.743	Up	0.00043519	ABCF4	81.087	25.7	106	12	12	172440	150230	146190	143190	133320	134210	270090	268450	278520	268010	282430	292060	135200	142670	125970	213410	202930	191530	341120	327840	318730	125350	139020	97922	cytoplasm			GO:0005215 transporter activity;	K06184	ABCF1; ATP-binding cassette, subfamily F, member 1		PF00005	ABC transporter
Capana10g001908	"THD1_ARATH Threonine dehydratase biosynthetic, chloroplastic OS=Arabidopsis thaliana GN=OMR1 PE=1 SV=1"	0.541	Down	0.0020579	OMR1	66.875	21.7	76	8	8	174650	132690	140310	171030	145030	151950	83254	78941	80170	121400	123810	118410	83398	48512	71279	57504	90982	56471	63822	80188	57873	129940	107630	109470	chloroplast	GO:0006082 organic acid metabolic process; GO:0006520 cellular amino acid metabolic process; GO:0006549 isoleucine metabolic process; GO:0006807 nitrogen compound metabolic process; GO:0008152 metabolic process; GO:0008652 cellular amino acid biosynthetic process; GO:0009058 biosynthetic process; GO:0009081 branched-chain amino acid metabolic process; GO:0009082 branched-chain amino acid biosynth…	GO:0005622 intracellular; GO:0005623 cell; GO:0005737 cytoplasm; GO:0009507 chloroplast; GO:0009536 plastid; GO:0043226 organelle; GO:0043227 membrane-bounded organelle; GO:0043229 intracellular organelle; GO:0043231 intracellular membrane-bounded organelle; GO:0044424 intracellular part; GO:0044444 cytoplasmic part; GO:0044464 cell part;	GO:0003824 catalytic activity; GO:0004794 L-threonine ammonia-lyase activity; GO:0016829 lyase activity; GO:0016840 carbon-nitrogen lyase activity; GO:0016841 ammonia-lyase activity;	K01754	E4.3.1.19, ilvA, tdcB; threonine dehydratase [EC:4.3.1.19]	cann00260 Glycine, serine and threonine metabolism; cann00290 Valine, leucine and isoleucine biosynthesis; cann01100 Metabolic pathways; cann01110 Biosynthesis of secondary metabolites; cann01200 Carbon metabolism; cann01230 Biosynthesis of amino acids	PF00585	C-terminal regulatory domain of Threonine dehydratase
Capana10g001923	Y1571_ARATH Probable leucine-rich repeat receptor-like protein kinase At1g35710 OS=Arabidopsis thaliana GN=At1g35710 PE=2 SV=1	0.644	Down	0.040664	At1g35710	34.208	15.3	46	4	4	61287	69688	71970	71036	68867	69618	33167	55004	42535	55260	60213	51113	68403	66563	67532	55949	54672	41124	43577	46902	46243	76131	103430	89205	cytoplasm
Capana10g001943	"PR2E2_ORYSJ Peroxiredoxin-2E-2, chloroplastic OS=Oryza sativa subsp. japonica GN=PRXIIE-2 PE=1 SV=1"	1.584	Up	0.020301	PRXIIE-2	24.596	61.6	210	11	11	3489500	4581100	5356200	5340200	5474100	5975400	7389100	7041800	6835900	7632300	7531700	7127900	6150700	6265500	6100600	4930500	5834400	5989400	6890400	6901700	6782800	11153000	9972900	9303600	chloroplast	GO:0006950 response to stress; GO:0006952 defense response; GO:0009605 response to external stimulus; GO:0009607 response to biotic stimulus; GO:0009617 response to bacterium; GO:0042742 defense response to bacterium; GO:0043207 response to external biotic stimulus; GO:0050896 response to stimulus; GO:0051704 multi-organism process; GO:0051707 response to other organism; GO:0098542 defense respon…	GO:0005618 cell wall; GO:0005622 intracellular; GO:0005623 cell; GO:0005737 cytoplasm; GO:0009505 plant-type cell wall; GO:0009507 chloroplast; GO:0009526 plastid envelope; GO:0009532 plastid stroma; GO:0009536 plastid; GO:0009570 chloroplast stroma; GO:0009579 thylakoid; GO:0009941 chloroplast envelope; GO:0030312 external encapsulating structure; GO:0031967 organelle envelope; GO:0031975 envelo…					PF08534	Redoxin
Capana10g002117	GRPE_THEEB Protein grpE OS=Thermosynechococcus elongatus (strain BP-1) GN=grpE PE=3 SV=1	2.518	Up	2.7068e-06	grpE	39.702	50.7	179	14	13	264450	244060	246450	215540	209830	226580	628140	621980	649580	325610	321180	390830	587920	533140	539450	874930	942260	924390	1950200	1953400	1988400	890310	925870	873930	chloroplast				K03687	GRPE; molecular chaperone GrpE
Capana10g002120	replication protein A 14 kDa subunit B-like	0.418	Down	0.00106266	---	11.658	82.2	49	5	5	105610	84745	77720	102440	105930	88634	33913	38714	39288	113620	125460	124980	79578	75273	69626	79473	70248	48111	40806	60469	42052	177540	187590	49620	cytoplasm				K10740	RPA3; replication factor A3	cann03030 DNA replication; cann03420 Nucleotide excision repair; cann03430 Mismatch repair; cann03440 Homologous recombination	PF08661	Replication factor A protein 3
Capana10g002138	SPT6H_HUMAN Transcription elongation factor SPT6 OS=Homo sapiens GN=SUPT6H PE=1 SV=2	2.626	Up	0.000155882	SUPT6H	193.81	14.8	72	16	16	123420	151750	136290	136280	117940	117110	363120	379940	337170	201520	193470	194830	93962	116730	109610	264770	275270	225790	410220	366100	394370	108660	78166	79885	nucleus	GO:0000003 reproduction; GO:0000018 regulation of DNA recombination; GO:0002637 regulation of immunoglobulin production; GO:0002682 regulation of immune system process; GO:0002694 regulation of leukocyte activation; GO:0002697 regulation of immune effector process; GO:0002700 regulation of production of molecular mediator of immune response; GO:0002703 regulation of leukocyte mediated immunity; G…	GO:0000785 chromatin; GO:0005622 intracellular; GO:0005623 cell; GO:0005634 nucleus; GO:0005654 nucleoplasm; GO:0005694 chromosome; GO:0005737 cytoplasm; GO:0005829 cytosol; GO:0005911 cell-cell junction; GO:0008023 transcription elongation factor complex; GO:0009506 plasmodesma; GO:0030054 cell junction; GO:0031974 membrane-enclosed lumen; GO:0031981 nuclear lumen; GO:0032991 macromolecular comp…	GO:0000988 transcription factor activity, protein binding; GO:0000990 transcription factor activity, core RNA polymerase binding; GO:0000991 transcription factor activity, core RNA polymerase II binding; GO:0003682 chromatin binding; GO:0003700 transcription factor activity, sequence-specific DNA binding; GO:0005488 binding; GO:0005515 protein binding; GO:0031491 nucleosome binding; GO:0042393 hi…	K11292	SUPT6H, SPT6; transcription elongation factor SPT6
Capana10g002197	"PAP13_ARATH Probable plastid-lipid-associated protein 13, chloroplastic OS=Arabidopsis thaliana GN=PAP13 PE=1 SV=2"	1.515	Up	0.026835	PAP13	33.843	37	147	9	8	551690	624660	704030	735860	766340	797300	944950	960690	944580	889090	922100	822800	1306500	1229200	1309700	1216100	1285500	1291400	1229400	1304500	1297900	1584400	1365300	1551000	chloroplast
[truncated: 10,108 more rows]
