# Supplementary material for: Comprehensive Proteome and Lysine Acetylome Analysis Reveals the Widespread Involvement of Acetylation in Cold Resistance of Pepper (Capsicum annuum L.)
Source: Front Plant Sci. 2021 Aug 27;12:730489. doi: 10.3389/fpls.2021.730489 (PMC8429487; doi:10.3389/fpls.2021.730489)
Supplement: Supplementary Table 3 — Statistics of acetylation-related proteins in proteome data. [file Table_3.XLSX]

## Sheet: Sheet1
Table S3. Statistics of acetylation related proteins in proteome data								A188												A122
The red part represents the quantified acetyltransferase；The yellow part represents the quantified deacetylase；The gray part represents the acylation related proteins identified but not quantified ；
Protein accession	Protein description	Gene name	Mol. weight [kDa]	Sequence coverage [%]	MS/MS Counts	Peptides	Unique peptides	LFQ intensity T0_1	LFQ intensity T0_2	LFQ intensity T0_3	LFQ intensity T1_1	LFQ intensity T1_2	LFQ intensity T1_3	LFQ intensity T2_1	LFQ intensity T2_2	LFQ intensity T2_3	LFQ intensity R1_1	LFQ intensity R1_2	LFQ intensity R1_3	LFQ intensity T0_1	LFQ intensity T0_2	LFQ intensity T0_3	LFQ intensity T1_1	LFQ intensity T1_2	LFQ intensity T1_3	LFQ intensity T2_1	LFQ intensity T2_2	LFQ intensity T2_3	LFQ intensity R1_1	LFQ intensity R1_2	LFQ intensity R1_3
Capana09g002402	GNA1_DICDI Glucosamine 6-phosphate N-acetyltransferase 1 OS=Dictyostelium discoideum GN=gna1 PE=3 SV=1	gna1	18.023	46.2	40	5	3	182280	159250	147020	176700	173410	174020	169800	140630	165790	135010	138640	158030	250520	241900	241440	193980	192010	177600	238800	230000	228620	195100	218090	216580
Capana12g000438	GNA1_DICDI Glucosamine 6-phosphate N-acetyltransferase 1 OS=Dictyostelium discoideum GN=gna1 PE=3 SV=1	gna1	31.324	23.4	100	5	3	156750	157660	167600	188060	191230	177410	143770	116990	193390	169910	116360	115460	413410	413110	427390	400610	479240	394120	406870	454670	406880	545130	561280	597230
Capana08g000464	HATB_ARATH Histone acetyltransferase type B catalytic subunit OS=Arabidopsis thaliana GN=HAG2 PE=2 SV=1	HAG2	53.929	17.5	68	6	6	109880	119080	118620	130530	121970	136760	71506	71452	66452	98926	107500	103950	93701	103390	75278	86524	93574	82878	96147	104520	77703	117040	115700	89554
Capana01g002684	NAA11_MOUSE N-alpha-acetyltransferase 11 OS=Mus musculus GN=Naa11 PE=2 SV=1	Naa11	16.849	20.5	32	2	2	55741	47494	52564	53543	50432	57697	0	26657	26775	21264	23687	0	39172	39067	0	0	0	0	0	0	0	0	0	23939
Capana03g000315	NAA16_MOUSE N-alpha-acetyltransferase 16, NatA auxiliary subunit OS=Mus musculus GN=Naa16 PE=2 SV=1	Naa16	102.58	23.7	150	16	11	535100	524260	478470	443990	449130	428180	499870	542670	506880	426280	420570	422560	334100	372630	351350	492060	403860	477720	511170	515210	540060	281350	221110	263790
Capana06g001309	NAA16_MOUSE N-alpha-acetyltransferase 16, NatA auxiliary subunit OS=Mus musculus GN=Naa16 PE=2 SV=1	Naa16	95.868	15	8	10	5	0	0	45604	0	0	0	47747	0	0	0	0	0	0	41811	0	0	0	0	43156	0	34896	0	0	0
Capana09g001341	NAA25_RAT N-alpha-acetyltransferase 25, NatB auxiliary subunit OS=Rattus norvegicus GN=Naa25 PE=2 SV=1	Naa25	30.372	23.6	17	4	4	36737	0	43118	46133	38532	0	45387	36099	0	0	0	59089	0	0	45746	39968	58079	33165	38376	35529	36867	0	0	0
Capana06g001413	NAA50_MOUSE N-alpha-acetyltransferase 50 OS=Mus musculus GN=Naa50 PE=1 SV=1	Naa50	18.678	18.7	15	2	2	53412	57638	0	0	61938	93657	0	0	56521	61846	60709	92976	105870	64830	0	0	112340	64038	0	0	0	70818	26341	0
Capana10g001194	NSI_ORYSJ Probable acetyltransferase NSI OS=Oryza sativa subsp. japonica GN=NSI PE=2 SV=1	NSI	24.424	41.9	95	5	5	187080	189550	196240	201520	192450	192620	229710	201660	245450	238980	216870	256110	223190	220520	201380	212880	218430	200650	266210	246940	261920	269840	295790	287920
Capana04g001609	ODP2_ZYMMO Dihydrolipoyllysine-residue acetyltransferase component of pyruvate dehydrogenase complex OS=Zymomonas mobilis (strain ATCC 31821 / ZM4 / CP4) GN=pdhC PE=3 SV=2	pdhC	49.138	38.4	208	9	8	1432000	1346000	1295400	1350400	1329500	1389900	1226400	1225500	1193100	1438600	1460700	1366900	1395500	1457800	1470400	1349600	1305000	1325400	1432800	1348400	1435700	1568900	1593600	1618700
Capana11g002272	ODP2_ZYMMO Dihydrolipoyllysine-residue acetyltransferase component of pyruvate dehydrogenase complex OS=Zymomonas mobilis (strain ATCC 31821 / ZM4 / CP4) GN=pdhC PE=3 SV=2	pdhC	33.074	24.4	83	5	4	268710	219490	229450	261070	280260	263270	262080	235690	250620	316570	315930	324430	262150	252080	251240	211360	226240	234840	200620	247750	251000	360220	268300	315250
Capana12g002313	OPD21_ARATH Dihydrolipoyllysine-residue acetyltransferase component 1 of pyruvate dehydrogenase complex, mitochondrial OS=Arabidopsis thaliana GN=LTA3 PE=1 SV=2	LTA3	64.649	34.9	180	12	12	790880	781310	761340	703150	733140	762950	916940	957690	938730	846680	876970	773250	843040	791110	811890	736140	873010	861520	922280	892460	904780	766110	684920	636100
Capana07g000051	OPD23_ARATH Dihydrolipoyllysine-residue acetyltransferase component 3 of pyruvate dehydrogenase complex, mitochondrial OS=Arabidopsis thaliana GN=At1g54220 PE=1 SV=1	At1g54220	58.076	38.9	303	16	16	1947100	1956100	1950500	2019300	1987700	1998700	2093100	2120000	2152400	2158100	2094500	2075300	2195500	2281500	2214600	2293100	2291300	2340700	2359000	2312800	2298600	2075800	2254400	2283000
Capana09g000219	SAT5_ARATH Serine acetyltransferase 5 OS=Arabidopsis thaliana GN=SAT5 PE=1 SV=1	SAT5	31.39	33.3	36	4	4	73090	63805	70982	71946	57959	58067	49222	56621	51436	49524	54347	48884	46325	55139	50787	65136	54308	45970	44650	42338	52242	73358	58394	68683
Capana07g001146	THIC1_ARATH Acetyl-CoA acetyltransferase, cytosolic 1 OS=Arabidopsis thaliana GN=AAT1 PE=2 SV=1	AAT1	41.449	55.4	316	15	15	1456700	1419300	1416800	1363500	1351200	1368000	1251500	1255000	1266800	1294100	1288700	1282100	1525300	1542500	1542700	1450500	1381400	1365700	1311200	1333100	1266000	1650000	1671300	1659400
Capana05g000154	THIC2_ARATH Probable acetyl-CoA acetyltransferase, cytosolic 2 OS=Arabidopsis thaliana GN=At5g47720 PE=2 SV=1	At5g47720	42.406	44.7	140	10	10	414400	364590	370010	363420	356030	316840	331170	360780	404470	306210	334300	336660	423010	450320	453620	451690	457090	464410	406130	385790	383610	509040	451080	445340
Capana03g000730	Y3028_ARATH Uncharacterized acetyltransferase At3g50280 OS=Arabidopsis thaliana GN=At3g50280 PE=1 SV=1	At3g50280	52.926	25.7	69	7	7	205010	204360	180700	179980	176520	175050	123710	135630	127710	129660	132380	134730	112660	113120	121410	142810	128590	123310	108220	76327	99112	95341	93683	102660
Capana03g004631	YOAA_BACSU Uncharacterized N-acetyltransferase YoaA OS=Bacillus subtilis GN=yoaA PE=3 SV=2	yoaA	20.123	24.3	20	3	3	36490	41608	84837	73803	85429	87011	53134	0	59890	80155	85589	56942	0	29278	0	58165	0	63572	0	49112	51843	91700	74404	36054
Capana03g004633	YP20_BACLI Uncharacterized N-acetyltransferase p20 OS=Bacillus licheniformis GN=p20 PE=4 SV=1	p20	19.401	37.6	77	5	5	84872	294490	203670	245040	264560	39833	305430	279220	305070	276040	289470	250500	375870	377490	341820	380820	369910	399700	369280	344680	357670	446230	464440	485650
Capana01g001049	ARGE_DICDI Acetylornithine deacetylase OS=Dictyostelium discoideum GN=argE PE=1 SV=2	argE	48.035	40.9	146	10	10	728920	727530	680600	710840	697990	695980	670670	677440	661000	561800	561210	556330	694190	694030	694240	714750	719050	701120	646150	634710	624060	732970	708540	677210
Capana04g001713	HDA14_ARATH Histone deacetylase 14 OS=Arabidopsis thaliana GN=HDA14 PE=2 SV=1	HDA14	37.082	9.3	34	2	2	67023	0	47922	65000	70445	61925	66250	62975	0	25737	42261	31992	55260	0	52909	70361	71206	67980	62469	41614	55358	49922	0	54306
Capana05g001085	HDA19_ARATH Histone deacetylase 19 OS=Arabidopsis thaliana GN=HDA19 PE=1 SV=2	HDA19	55.769	7.6	7	2	2	0	17649	24911	0	0	0	0	0	0	0	0	0	0	0	12210	0	0	0	0	0	18386	0	0	0
Capana03g000880	HDA5_ARATH Histone deacetylase 5 OS=Arabidopsis thaliana GN=HDA5 PE=2 SV=1	HDA5	75.955	34.1	118	14	14	457400	396120	365570	390340	407790	373000	310890	298200	316320	306270	309210	313020	312790	315240	315590	334840	299660	307960	290470	279170	299320	266750	265330	293520
Capana12g000224	HDA6_ARATH Histone deacetylase 6 OS=Arabidopsis thaliana GN=HDA6 PE=1 SV=1	HDA6	52.355	21.9	14	5	5	0	0	37634	61346	0	0	24821	0	0	26630	28074	0	0	39822	0	63123	35379	0	0	0	0	0	0	0
Capana01g001030	AAE1_ARATH Probable acyl-activating enzyme 1, peroxisomal OS=Arabidopsis thaliana GN=AAE1 PE=2 SV=1	AAE1	61.262	9.4	35	4	4	119400	112510	118820	117880	116200	119860	88844	99573	92418	98435	93307	90246	125820	130520	141300	119420	127870	115240	99797	100960	104010	77866	73402	68842
Capana06g003048	AAE1_ARATH Probable acyl-activating enzyme 1, peroxisomal OS=Arabidopsis thaliana GN=AAE1 PE=2 SV=1	AAE1	57.383	17	60	6	6	2183700	2100000	2017400	2061800	1873200	1988700	2019600	2053300	2226700	1579800	1493500	1751700	2149600	1826000	1773400	2162400	2157600	2115800	1736700	1829100	1836500	1596200	1620400	1454900
Capana03g004100	AAE16_ARATH Probable acyl-activating enzyme 16, chloroplastic OS=Arabidopsis thaliana GN=AAE16 PE=2 SV=1	AAE16	77.257	33.1	242	14	14	520290	500970	519570	515160	489390	505650	559920	570310	556050	394840	406970	406980	535460	521090	509820	509310	533370	521660	486290	462140	451930	265150	280490	305000
Capana03g000951	AAE17_ARATH Probable acyl-activating enzyme 17, peroxisomal OS=Arabidopsis thaliana GN=AAE17 PE=2 SV=1	AAE17	78.363	11.2	18	5	5	57165	60291	94040	36063	65344	102220	28924	35755	101630	70746	56267	0	56859	43874	80714	62372	57918	53511	80967	65552	94586	56677	89483	76210
Capana05g001000	AAE17_ARATH Probable acyl-activating enzyme 17, peroxisomal OS=Arabidopsis thaliana GN=AAE17 PE=2 SV=1	AAE17	36.086	33.2	34	7	7	51113	52286	48552	59746	53776	48200	60469	59342	53659	33514	37540	38462	64697	65925	60071	52044	58570	47884	46930	47676	47765	49092	39962	33975
Capana07g002148	AAE17_ARATH Probable acyl-activating enzyme 17, peroxisomal OS=Arabidopsis thaliana GN=AAE17 PE=2 SV=1	AAE17	48.806	7.7	27	3	3	48034	49618	58752	56713	55108	49977	58344	58116	60896	39368	36700	38197	61363	63107	60815	50247	50220	52684	49433	50235	43266	36644	34062	0
Capana08g001371	AAE6_ARATH Probable acyl-activating enzyme 6 OS=Arabidopsis thaliana GN=AAE6 PE=2 SV=1	AAE6	60.743	17.5	78	6	5	357790	347420	304550	302850	321050	273840	263060	292630	276040	192840	207490	192030	353280	328210	327650	362910	320650	356620	245500	303550	291490	181020	194500	201040
Capana03g001976	ACBP2_ARATH Acyl-CoA-binding domain-containing protein 2 OS=Arabidopsis thaliana GN=ACBP2 PE=1 SV=1	ACBP2	40.471	14.8	17	3	3	24105	31905	20862	14783	14470	19028	0	26907	24927	0	0	0	22634	35792	24994	65657	46814	39976	0	21320	40245	0	0	0
Capana12g002411	ACBP4_ARATH Acyl-CoA-binding domain-containing protein 4 OS=Arabidopsis thaliana GN=ACBP4 PE=1 SV=1	ACBP4	54.044	40.6	240	15	15	606160	641540	634540	688560	640630	670590	537740	513480	531800	561830	568820	571700	599890	596420	569530	510320	520960	518950	541170	543680	517990	535020	508930	523090
Capana08g001489	ACBP4_ARATH Acyl-CoA-binding domain-containing protein 4 OS=Arabidopsis thaliana GN=ACBP4 PE=1 SV=1	ACBP4	72.978	34.5	177	15	15	494130	505990	521560	503160	498300	479350	487190	474720	497900	530370	526120	503560	496680	508330	510730	492120	461450	479350	519820	513830	506520	492380	479000	485150
Capana05g000367	ACD10_MOUSE Acyl-CoA dehydrogenase family member 10 OS=Mus musculus GN=Acad10 PE=2 SV=1	Acad10	89.701	34.2	220	16	16	360670	347030	347710	323560	319640	328300	352850	353810	360990	308990	291440	293670	329760	331310	348430	336510	336470	331790	349850	345860	323810	127880	139510	154090
Capana08g000911	ACOT8_MOUSE Acyl-coenzyme A thioesterase 8 OS=Mus musculus GN=Acot8 PE=1 SV=1	Acot8	46.362	33.7	94	9	8	296580	303500	275920	267080	264600	274510	265440	272610	270260	225460	232910	231530	170570	173920	171440	197020	186110	174370	169230	157130	153910	120280	126010	125020
Capana01g000588	ACOX1_ARATH Peroxisomal acyl-coenzyme A oxidase 1 OS=Arabidopsis thaliana GN=ACX1 PE=1 SV=1	ACX1	74.449	44	268	22	22	945290	889120	800300	902680	804040	780310	730360	718300	757400	691670	702600	743970	834650	813770	791600	876400	848520	794020	761780	746480	736630	486330	490880	550170
Capana10g000322	ACOX3_ARATH Acyl-coenzyme A oxidase 3, peroxisomal OS=Arabidopsis thaliana GN=ACX3 PE=1 SV=1	ACX3	46.618	12.8	55	4	4	92510	55574	89101	72081	93852	88882	71261	85688	87635	68294	79723	72855	326200	325420	311790	323330	322830	337990	302180	311790	294740	146430	138860	134530
Capana10g000325	ACOX3_ARATH Acyl-coenzyme A oxidase 3, peroxisomal OS=Arabidopsis thaliana GN=ACX3 PE=1 SV=1	ACX3	75.649	33.5	170	15	15	235490	206340	216240	229330	231190	229580	234830	221330	228310	215730	185860	201010	614110	610700	609910	566860	555020	566540	566840	561750	511660	290700	306860	337730
Capana10g001354	ACOX4_ARATH Acyl-coenzyme A oxidase 4, peroxisomal OS=Arabidopsis thaliana GN=ACX4 PE=1 SV=1	ACX4	58.398	20.7	66	8	7	159130	136000	139130	160590	181920	178540	143270	132140	127920	137450	149090	151680	199420	190330	189710	195690	170830	174020	163710	169970	152460	261750	247350	252490
Capana10g001620	ACOX4_ARATH Acyl-coenzyme A oxidase 4, peroxisomal OS=Arabidopsis thaliana GN=ACX4 PE=1 SV=1	ACX4	46.908	29.9	81	7	6	146750	142480	139500	146600	142610	131930	116790	119920	113910	108610	105330	100160	125640	118180	118690	111220	122330	112760	78422	80805	76098	145190	152700	155260
Capana03g000656	ACP1_CUPLA Acyl carrier protein 1, chloroplastic OS=Cuphea lanceolata GN=ACL1.1 PE=2 SV=1	ACL1.1	17.444	12	30	3	3	48087	51622	48524	46230	57536	54046	77773	15236	106840	69462	96633	97574	0	65602	59066	26532	69826	39955	82670	73638	68712	121870	91890	88896
Capana01g003392	ACPM1_ARATH Acyl carrier protein 1, mitochondrial OS=Arabidopsis thaliana GN=MTACP1 PE=2 SV=1	MTACP1	21.724	28.9	34	3	3	458850	364760	421280	387170	361330	366660	389220	361700	362440	449480	488280	400470	368660	358740	332850	398150	325990	424770	458270	404350	418520	523350	506860	458990
Capana05g001203	acyl-acyl carrier protein thioesterase ATL3, chloroplastic	---	23.494	22.7	48	4	4	506080	493740	474170	501190	486030	559740	453060	497650	529870	518310	493940	441260	445210	515170	441730	489460	514410	520330	397920	402050	397150	339610	342830	389820
Capana10g000357	ANTA_GENTR Anthocyanin 5-aromatic acyltransferase OS=Gentiana triflora PE=1 SV=1	---	50.489	48.7	316	17	12	1621600	1619800	1597300	1602200	1554200	1623300	1469300	1472000	1464000	1000700	1023200	1104500	1547200	1432600	1495600	1486100	1501400	1582600	987890	1056000	1117300	1729600	1796700	1723300
Capana10g000370	ANTA_GENTR Anthocyanin 5-aromatic acyltransferase OS=Gentiana triflora PE=1 SV=1	---	50.409	27.4	96	8	5	198400	207750	208310	234930	235620	229920	166050	173720	172490	132370	157930	139070	204690	204970	216730	174070	180200	185940	149940	159750	157380	325090	318610	298580
Capana10g000432	ANTA_GENTR Anthocyanin 5-aromatic acyltransferase OS=Gentiana triflora PE=1 SV=1	---	50.577	31.9	150	10	7	622090	616010	664450	764210	769420	789600	480950	509170	500060	519960	521670	513960	731880	739910	745670	681970	679330	691390	582280	601380	575910	1144300	1176800	1074900
Capana10g000439	ANTA_GENTR Anthocyanin 5-aromatic acyltransferase OS=Gentiana triflora PE=1 SV=1	---	50.719	27.4	71	10	5	863170	765350	610290	861280	831140	739680	93298	671160	676090	475030	340940	342830	644140	505540	524310	766550	769290	616680	498660	405380	482910	786070	782150	798110
Capana12g002808	APTH1_CRYNJ Acyl-protein thioesterase 1 OS=Cryptococcus neoformans var. neoformans serotype D (strain JEC21 / ATCC MYA-565) GN=CNF02430 PE=3 SV=1	CNF02430	23.166	42.5	110	6	6	333960	355680	309910	352280	340870	344240	314010	316560	314290	332890	316220	335140	335270	280180	327520	321790	317780	331500	296460	316410	300720	389330	447120	413960
Capana03g002198	DCR_ARATH BAHD acyltransferase DCR OS=Arabidopsis thaliana GN=DCR PE=2 SV=1	DCR	50.118	43.3	371	17	17	2613900	2690200	2704100	2650500	2570400	2626300	2515500	2485200	2494400	2745900	2731700	2735600	3575900	3496900	3549600	3369500	3347900	3425200	3302100	3308500	3291600	3103900	3145800	3103000
Capana02g001074	DGAT2_ARATH Diacylglycerol O-acyltransferase 2 OS=Arabidopsis thaliana GN=DGAT2 PE=2 SV=1	DGAT2	37.152	15.1	45	4	4	42279	48301	43723	49186	43940	45398	36906	40137	40935	37826	0	32561	56133	54457	71358	68711	62547	60806	41258	40219	40763	56242	72870	66389
Capana01g003621	FABD_MOUSE Malonyl-CoA-acyl carrier protein transacylase, mitochondrial OS=Mus musculus GN=Mcat PE=2 SV=3	Mcat	40.693	54.7	280	16	16	3526900	3134900	3036600	3227300	3124800	3095100	2687200	2850500	2802300	3051700	3079100	3109700	2934100	3057700	2942700	3289300	3134800	2988900	2951800	3050000	2814700	3919200	4130300	4067500
Capana06g000897	FABG_CUPLA 3-oxoacyl-[acyl-carrier-protein] reductase, chloroplastic OS=Cuphea lanceolata GN=CLKR27 PE=2 SV=1	CLKR27	32.519	28	145	5	5	1012100	1134500	1189700	1072900	1137600	1101600	1196100	1110700	1159100	1317400	1292500	1314900	1282600	1259100	1362200	1173300	1164500	1225900	1237600	1269700	1206300	1470400	1401800	1361800
Capana03g001671	FABH1_CUPWR 3-oxoacyl-[acyl-carrier-protein] synthase 3 A, chloroplastic OS=Cuphea wrightii GN=KAS3A PE=2 SV=2	KAS3A	46.623	27.9	67	8	8	576520	455080	445060	607970	517490	476670	360380	418200	384000	401900	379220	349500	413070	414620	351260	352640	388550	373860	345420	268250	169780	346420	416190	409330
Capana01g001480	FABI_BRANA Enoyl-[acyl-carrier-protein] reductase [NADH], chloroplastic OS=Brassica napus PE=1 SV=2	---	42.617	48.7	278	13	11	1525500	1628700	1712800	1692200	1810300	1803100	1914000	1896600	1841300	2464700	2564500	2719000	2044800	1887000	2014000	1933600	1983300	1943600	1958400	1950000	1931600	3354300	3383600	3070500
Capana08g002013	FABZ_THEEB (3R)-hydroxymyristoyl-[acyl-carrier-protein] dehydratase OS=Thermosynechococcus elongatus (strain BP-1) GN=fabZ PE=3 SV=1	fabZ	24.271	33.9	130	6	6	2319700	2340600	2196500	2533900	2533700	2493000	2540500	2513600	2577300	3119700	3214900	3104400	2335800	2293000	2393600	2468200	2471800	2432300	2371100	2396700	2344900	3871600	4112200	4013400
Capana06g000595	FACR3_ARATH Fatty acyl-CoA reductase 3 OS=Arabidopsis thaliana GN=FAR3 PE=2 SV=1	FAR3	55.73	20.2	79	7	7	127120	118100	96053	103820	97381	91178	81477	70341	75037	60417	46019	61697	111550	109560	107630	132350	142580	129410	100590	93424	100630	92430	93006	93317
Capana06g000197	FATA_CORSA Oleoyl-acyl carrier protein thioesterase, chloroplastic (Fragment) OS=Coriandrum sativum GN=FATA PE=2 SV=1	FATA	41.942	21.6	13	5	5	131810	104680	0	126910	115180	103050	81023	73992	0	0	0	82102	101810	98703	111400	0	0	104460	105160	96678	99093	104570	109290	99141
Capana00g003388	GPAT3_RAT Glycerol-3-phosphate acyltransferase 3 OS=Rattus norvegicus GN=Agpat9 PE=2 SV=1	Agpat9	36.137	8	7	2	2	0	0	0	0	0	53651	42340	0	0	0	46410	0	0	0	47867	36939	55210	0	0	0	0	0	0	46536
Capana08g000936	GPAT4_ARATH Glycerol-3-phosphate acyltransferase 4 OS=Arabidopsis thaliana GN=GPAT4 PE=1 SV=1	GPAT4	55.741	47	305	18	18	1672700	1726900	1750100	1720000	1672000	1720500	1584900	1526200	1537700	1068500	1083800	1047500	1676500	1628300	1642600	1730600	1648300	1617400	1276000	1299500	1349100	1317800	1274700	1250800
Capana02g001556	KASC1_ARATH 3-oxoacyl-[acyl-carrier-protein] synthase I, chloroplastic OS=Arabidopsis thaliana GN=KAS1 PE=1 SV=2	KAS1	50.081	46.4	408	13	13	2945300	2977200	2852000	3031200	3121800	3029400	2834800	2912500	2916000	2690700	2625100	2613900	2929900	2988800	3059500	3104600	2995300	3057900	2890200	3017600	2910700	2869600	3039600	2960500
Capana00g003823	KASC2_ARATH 3-oxoacyl-[acyl-carrier-protein] synthase II, chloroplastic OS=Arabidopsis thaliana GN=KAS2 PE=1 SV=1	KAS2	50.902	23.6	112	8	7	244100	221600	212250	242780	223120	221460	156540	148620	150820	101460	102230	108530	181490	185360	192890	190530	191340	187250	151670	163780	153570	143230	169540	148920
Capana09g000140	KASC2_ARATH 3-oxoacyl-[acyl-carrier-protein] synthase II, chloroplastic OS=Arabidopsis thaliana GN=KAS2 PE=1 SV=1	KAS2	49.668	11.5	22	3	2	36833	38699	34385	61320	37347	39688	33403	31027	28176	0	0	27912	0	29141	24221	26222	28805	0	0	19617	0	0	23298	0
Capana01g002806	LACS1_ARATH Long chain acyl-CoA synthetase 1 OS=Arabidopsis thaliana GN=LACS1 PE=2 SV=1	LACS1	75.325	38.9	183	17	17	652760	676510	652020	643230	595300	614940	544400	531570	616850	493420	529060	538130	646790	662130	679720	665750	656600	677370	611350	589490	599400	376980	350280	334250
Capana00g003392	LACS4_ARATH Long chain acyl-CoA synthetase 4 OS=Arabidopsis thaliana GN=LACS4 PE=2 SV=1	LACS4	70.173	14.3	60	7	2	138180	167000	175260	172610	158840	203380	231220	199820	213070	144010	113310	129330	180390	183350	178480	159260	141770	164110	155980	196790	216640	121820	148180	130830
Capana00g002110	LACS7_ARATH Long chain acyl-CoA synthetase 7, peroxisomal OS=Arabidopsis thaliana GN=LACS7 PE=1 SV=2	LACS7	76.8	33.5	248	13	13	817640	778210	749220	771450	776670	791250	713130	707860	747980	669530	594480	589310	794990	707670	709440	768060	709760	665890	605730	610730	566520	336420	333710	383630
Capana07g001167	LACS8_ARATH Long chain acyl-CoA synthetase 8 OS=Arabidopsis thaliana GN=LACS8 PE=2 SV=1	LACS8	79.464	21.3	49	10	7	174180	267610	186250	218150	200050	147940	252970	178500	181070	103210	144140	152840	269060	147720	144360	274650	235380	246380	277250	179630	131330	0	27716	0
Capana09g000172	LACS8_ARATH Long chain acyl-CoA synthetase 8 OS=Arabidopsis thaliana GN=LACS8 PE=2 SV=1	LACS8	78.296	26.1	134	12	9	535520	507540	480780	490070	484210	476810	525900	508670	534320	402690	426210	453500	432540	460330	474680	468220	467630	479160	528990	488500	493810	205270	242660	197840
Capana04g001980	LACS9_ARATH Long chain acyl-CoA synthetase 9, chloroplastic OS=Arabidopsis thaliana GN=LACS9 PE=2 SV=1	LACS9	75.426	34.8	244	17	17	855390	942110	941290	868100	934920	887460	1173600	1123200	1133900	834090	806510	848290	929040	913110	934070	888070	923040	949390	903100	963700	991970	405530	395630	396080
Capana05g001678	LCAT1_ARATH Lecithin-cholesterol acyltransferase-like 1 OS=Arabidopsis thaliana GN=LCAT1 PE=2 SV=1	LCAT1	47.62	13.6	46	4	4	33251	35597	24007	41955	31620	0	39107	21245	47759	41844	35195	0	52046	49535	42469	35505	28153	45279	19742	25456	0	55865	45108	37371
Capana07g000195	LPAT1_BRANA 1-acyl-sn-glycerol-3-phosphate acyltransferase 1, chloroplastic OS=Brassica napus GN=LPAT1 PE=2 SV=1	LPAT1	61.171	12.6	21	3	3	0	32212	0	35060	0	36298	37462	52238	51439	0	0	0	53810	54986	0	0	83462	88691	54525	73056	80717	0	0	62744
Capana03g003158	LPAT2_ARATH 1-acyl-sn-glycerol-3-phosphate acyltransferase 2 OS=Arabidopsis thaliana GN=LPAT2 PE=1 SV=2	LPAT2	41.544	20.9	42	6	5	131790	116620	111690	109770	85933	107280	107880	96839	111610	83926	89768	70881	106740	109090	92259	112710	106400	78221	95230	97947	101590	81100	76547	89321
Capana10g002361	LPAT2_ARATH 1-acyl-sn-glycerol-3-phosphate acyltransferase 2 OS=Arabidopsis thaliana GN=LPAT2 PE=1 SV=2	LPAT2	45.529	18.9	26	5	4	88988	70558	80136	75476	75562	69525	82438	60779	49451	0	32169	0	101660	85813	83430	118280	75257	91350	51559	67826	71603	57687	77681	78145
Capana09g000373	LYPA2_HUMAN Acyl-protein thioesterase 2 OS=Homo sapiens GN=LYPLA2 PE=1 SV=1	LYPLA2	26.695	22.5	107	3	3	288360	244920	229840	246410	262270	233370	218230	240750	222760	220580	188770	213590	219360	221120	216300	260420	257080	238710	244850	242480	252540	213050	271160	279600
Capana01g000325	MBOA2_RAT Membrane-bound O-acyltransferase domain-containing protein 2 OS=Rattus norvegicus GN=Mboat2 PE=2 SV=2	Mboat2	51.938	17.5	91	6	6	228270	236550	224140	234280	226050	246200	206780	225260	242460	178010	181420	177410	236760	263250	233000	263990	244780	244210	176230	191290	194460	238220	230250	245330
Capana01g002460	ODB2_HUMAN Lipoamide acyltransferase component of branched-chain alpha-keto acid dehydrogenase complex, mitochondrial OS=Homo sapiens GN=DBT PE=1 SV=3	DBT	55.036	50.7	281	18	18	761450	717530	686670	674830	734820	700090	724370	739050	764100	643250	653630	651330	727090	752970	738120	800650	791940	779110	746710	752400	722420	659190	651140	695110
Capana04g000402	PCAT2_MOUSE Lysophosphatidylcholine acyltransferase 2 OS=Mus musculus GN=Lpcat2 PE=1 SV=1	Lpcat2	45.71	18.4	25	5	5	54701	50745	51436	61787	65890	64952	39836	38851	37384	35623	50791	31545	68353	89953	84210	83000	55575	70292	42277	38304	32230	82946	88735	97169
Capana03g000136	PDAT1_ARATH Phospholipid:diacylglycerol acyltransferase 1 OS=Arabidopsis thaliana GN=PDAT1 PE=2 SV=1	PDAT1	74.477	42	238	18	17	696540	635520	639500	633530	602560	616350	594730	624820	614450	518280	529360	513540	591570	582220	555880	604100	532870	490740	463830	484140	492370	480130	489670	492980
Capana01g001121	PLSB_CARTI Glycerol-3-phosphate acyltransferase, chloroplastic OS=Carthamus tinctorius PE=2 SV=1	---	50.443	50.8	310	16	16	948060	922490	907270	937820	934450	919380	904340	896060	869750	1058800	1007100	1006800	957000	949030	969610	908610	886370	867800	937070	938640	973390	1315500	1288600	1305700
Capana06g002092	STAD_RICCO Acyl-[acyl-carrier-protein] desaturase, chloroplastic OS=Ricinus communis PE=1 SV=1	---	45.139	34.1	149	9	7	751300	763550	755560	725030	690990	704940	569980	537110	545300	711460	696240	721680	674160	661850	657880	570150	549360	555440	579370	556620	568070	911330	900290	874290
Capana03g002830	STAD_SOLCO Acyl-[acyl-carrier-protein] desaturase, chloroplastic OS=Solanum commersonii PE=2 SV=2	---	44.745	36.1	223	10	4	514690	547840	565910	541800	543200	546990	432670	437030	418790	543410	545530	537050	490540	485660	479260	460570	458670	454500	472460	463300	464750	601620	620790	575680
Capana08g001343	Y1457_ARATH Acyltransferase-like protein At1g54570, chloroplastic OS=Arabidopsis thaliana GN=At1g54570 PE=1 SV=1	At1g54570	75.615	23.2	53	9	9	99849	105730	103290	85897	86710	95973	82780	96099	101250	58670	61684	50581	60708	57351	56680	86225	102100	77503	58911	70511	59685	40269	41612	41981
Capana04g001250	ZDH19_ARATH Probable S-acyltransferase At4g24630 OS=Arabidopsis thaliana GN=At4g24630 PE=1 SV=2	At4g24630	53.75	6.6	25	2	2	0	48439	0	63608	41643	55218	39646	35358	44859	0	44352	0	0	46330	50185	0	45881	37494	0	0	0	0	0	43974
Capana08g002145	ZDHC2_ARATH Probable S-acyltransferase At2g14255 OS=Arabidopsis thaliana GN=At2g14255 PE=2 SV=2	At2g14255	59.605	5.5	6	2	2	0	0	0	0	27583	0	28501	29199	0	0	0	0	0	35107	0	0	0	0	40766	0	0	0	0	0
Capana02g002469	AAE2_ARATH Probable acyl-activating enzyme 2 OS=Arabidopsis thaliana GN=AAE2 PE=2 SV=1	AAE2	51.033	3	0	1	1	0	0	0	0	0	0	0	0	0	0	0	0	0	0	0	0	0	0	0	0	0	0	0	0
Capana12g002232	AAE6_ARATH Probable acyl-activating enzyme 6 OS=Arabidopsis thaliana GN=AAE6 PE=2 SV=1	AAE6	43.068	9.3	3	2	1	0	0	0	0	0	0	0	0	0	0	0	0	0	0	0	0	0	0	0	0	12156	0	0	0
Capana01g003112	ACP1_CASGL Acyl carrier protein 1, chloroplastic OS=Casuarina glauca GN=ACP1 PE=2 SV=1	ACP1	14.014	12.1	5	2	2	0	0	0	0	0	0	0	0	0	0	0	0	0	0	0	0	0	0	0	0	0	0	0	20035
Capana06g001870	ACP1_CASGL Acyl carrier protein 1, chloroplastic OS=Casuarina glauca GN=ACP1 PE=2 SV=1	ACP1	13.586	11.6	18	1	1	0	0	0	0	0	0	0	0	0	0	0	0	0	0	0	0	0	0	0	0	0	0	0	33937
Capana12g002794	ACPM3_ARATH Acyl carrier protein 3, mitochondrial OS=Arabidopsis thaliana GN=MTACP2 PE=2 SV=1	MTACP2	14.915	11.3	10	1	1	0	0	0	0	0	0	0	0	0	0	0	0	0	0	0	0	0	0	0	0	0	0	0	21939
Capana12g000005	AEE18_ARATH Probable acyl-activating enzyme 18, peroxisomal OS=Arabidopsis thaliana GN=AAE18 PE=2 SV=1	AAE18	81.777	4.9	2	2	2	0	0	0	0	0	0	0	0	0	0	0	0	0	0	0	0	0	0	0	0	0	0	0	44086
Capana10g001000	GCN5_ARATH Histone acetyltransferase GCN5 OS=Arabidopsis thaliana GN=HAG1 PE=1 SV=1	HAG1	28.31	6.1	15	1	1	0	0	0	0	0	0	0	0	0	0	0	0	0	0	0	0	0	0	0	0	0	0	0	4707.4
Capana05g000721	HAC12_ARATH Histone acetyltransferase HAC12 OS=Arabidopsis thaliana GN=HAC12 PE=2 SV=2	HAC12	144.93	1.7	0	1	1	0	0	0	0	0	0	0	0	0	0	0	0	0	0	0	0	0	0	0	0	0	0	0	0
Capana09g002339	HDT1_SOLCH Histone deacetylase HDT1 OS=Solanum chacoense GN=HDT1 PE=2 SV=1	HDT1	29.248	9.6	16	1	1	0	0	0	0	0	0	0	0	0	0	0	0	0	0	0	0	0	0	0	0	0	0	0	64947
Capana10g001577	HDT1_SOLCH Histone deacetylase HDT1 OS=Solanum chacoense GN=HDT1 PE=2 SV=1	HDT1	25.067	5.5	18	1	1	0	0	0	0	0	0	0	0	0	0	0	0	0	0	0	0	0	0	0	0	0	0	0	8781.4
Capana03g000124	KASC2_ARATH 3-oxoacyl-[acyl-carrier-protein] synthase II, chloroplastic OS=Arabidopsis thaliana GN=KAS2 PE=1 SV=1	KAS2	59.747	3.1	22	1	1	0	0	0	0	0	0	0	0	0	0	0	0	0	0	0	0	0	0	0	0	0	0	0	37543
Capana00g003394	LACS4_ARATH Long chain acyl-CoA synthetase 4 OS=Arabidopsis thaliana GN=LACS4 PE=2 SV=1	LACS4	45.333	30	9	7	2	0	0	0	0	0	0	0	0	0	0	0	0	0	0	0	0	0	0	0	0	0	0	0	8499.5
Capana07g000373	NAA35_MOUSE N-alpha-acetyltransferase 35, NatC auxiliary subunit OS=Mus musculus GN=Naa35 PE=1 SV=1	Naa35	79.342	7.1	4	2	2	0	0	0	0	0	0	0	0	0	0	0	0	0	0	0	0	0	127610	0	0	0	0	0	0
Capana00g003720	N-acetyltransferase domain-containing protein	---	28.143	6.7	10	1	1	0	0	0	0	0	0	0	0	0	0	0	0	0	0	0	0	0	0	0	0	0	0	3746.3	0
Capana12g002555	STAD_SOLTU Acyl-[acyl-carrier-protein] desaturase, chloroplastic OS=Solanum tuberosum PE=2 SV=1	---	45.032	22.5	22	7	1	0	0	0	0	0	0	0	0	0	0	0	0	0	0	0	0	0	0	0	0	0	0	0	21602
