# Supplementary material for: Comprehensive Proteome and Lysine Acetylome Analysis Reveals the Widespread Involvement of Acetylation in Cold Resistance of Pepper (Capsicum annuum L.)
Source: Front Plant Sci. 2021 Aug 27;12:730489. doi: 10.3389/fpls.2021.730489 (PMC8429487; doi:10.3389/fpls.2021.730489)
Supplement: Supplementary Table 4 — Pepper-acetylated protein intensity data under cold stress. [file Table_4.XLSX]

## Sheet: Sheet1
Table S4. Pepper acetylated protein intensity data under cold stress.												Modification sites information																								Protein quantitation
												A188												A122												A188												A122
Protein accession	Position	Amino acid	Protein description	Gene name	Localization probability	PEP	Score	Modified sequence	Charge	Mass error [ppm]	MS/MS Count	T0_1	T0_2	T0_3	T1_1	T1_2	T1_3	T2_1	T2_2	T2_3	R1_1	R1_2	R1_3	T0_1	T0_2	T0_3	T1_1	T1_2	T1_3	T2_1	T2_2	T2_3	R1_1	R1_2	R1_3	T0_1	T0_2	T0_3	T1_1	T1_2	T1_3	T2_1	T2_2	T2_3	R1_1	R1_2	R1_3	T0_1	T0_2
Capana00g000308	33	K	IF4E2_WHEAT Eukaryotic translation initiation factor 4E-2 OS=Triticum aestivum PE=1 SV=1	---	1	0.00108421	79.889	K(1)WTFWFDNQSKPK	3	-9.5018	8	1.175		1.063			1		0.731					0.898		0.875								1.25	1.009	0.637	0.951	0.66	0.802	0.574	0.792	1.058	0.886	0.955	1.139	1.185	1.076	1.016	1
Capana00g000308	106	K	IF4E2_WHEAT Eukaryotic translation initiation factor 4E-2 OS=Triticum aestivum PE=1 SV=1	---	1	0.000852577	80.128	WEDPECANGGK(1)WTVTSSR	2	0.40884	17			0.999			1.185	1.073	1.105		1.067	1.061	1.011	1.161		0.446		1.021		0.988	0.341		1.185		1.356	0.637	0.951	0.66	0.802	0.574	0.792	1.058	0.886	0.955	1.139	1.185	1.076	1.016	1
Capana00g000314	39	K	NIT2_HUMAN Omega-amidase NIT2 OS=Homo sapiens GN=NIT2 PE=1 SV=1	NIT2	1	5.67384e-22	126.17	FNIGLCQLAVTSDK(1)ER	2	-0.53362	2																						0.814		1.186	0.984	0.899	0.892	0.933	0.881	0.87	0.88	0.925	0.916	1.069	1.064	1.062	0.904	0.903
Capana00g000428	140	K	H2A_PETCR Histone H2A OS=Petroselinum crispum PE=2 SV=1	---	1	0.00181036	120.65	SPSK(1)ATK(1)SPK	2	-4.8969	10		0.956	1.017	0.832		0.731							1.386	1.181		1.14	1.082	1.141	0.534						0.857	0.983	1.062	1.281	1.223	1.295	0.76	0.855	0.752	0.999	1.021	1.093	1.054	1.068
Capana00g000428	143	K	H2A_PETCR Histone H2A OS=Petroselinum crispum PE=2 SV=1	---	1	0.00181036	120.65	SPSK(1)ATK(1)SPK	2	-4.8969	10		0.956	1.017	0.832		0.731							1.386	1.181		1.14	1.082	1.141	0.534						0.857	0.983	1.062	1.281	1.223	1.295	0.76	0.855	0.752	0.999	1.021	1.093	1.054	1.068
Capana00g000453	101	K	GCSH_FLAAN Glycine cleavage system H protein, mitochondrial OS=Flaveria anomala GN=GDCSH PE=2 SV=1	GDCSH	1	6.68349e-27	203.55	EYTK(1)LCDEEEVH	2	-6.3201	26	1.254	1.358	1.424	1.182	0.236	1.368	1.084	1.076	1.08	0.801	0.83	0.906	1.325	1.292	1.33	1.071	1.023	0.969	0.949	0.989	0.961	0.478	0.51	0.504	1.051	1.148	1.125	0.856	0.854	0.813	1.26	1.308	1.284	0.962	1.065	1.011	1.057	0.982
Capana00g000465	92	K	OLP1_SOLLC Osmotin-like protein OS=Solanum lycopersicum PE=1 SV=1	---	1	2.75582e-34	173.26	TGCTYEHGK(1)FYCATGDCGGR	3	-5.3932	20		1.235	0.964	1.401	1.665	1.76				0.956	0.735	0.816	1.245	1.177	1.132	0.619	0.442	0.495			0.457	0.919		0.981	1.179	1	0.967	1.27	1.314	1.289	0.409	0.42	0.42	0.859	0.849	0.87	0.925	0.909
Capana00g000465	194	K	OLP1_SOLLC Osmotin-like protein OS=Solanum lycopersicum PE=1 SV=1	---	1	8.73473e-153	244.44	SGCEAYK(1)TDELCCR	2	-4.1972	24	1.056	1	1.129	1.317	1.421	1.423	0.403	0.321	0.339	0.91	0.933	0.958	1.071	1.019	1.019	0.711	0.73	0.691	0.748	0.602	0.663	1.851	1.909	1.777	1.179	1	0.967	1.27	1.314	1.289	0.409	0.42	0.42	0.859	0.849	0.87	0.925	0.909
Capana00g000465	220	K	OLP1_SOLLC Osmotin-like protein OS=Solanum lycopersicum PE=1 SV=1	---	1	1.37078e-87	156.24	PSTYSQYFK(1)HACPATFTYAHDSPSLMHECSSPR	4	2.6042	20	1.541	1.481	1.393	1.453	1.443						0.846	0.962			0.836	0.819	0.738	0.689		0.64	0.635	0.523			1.179	1	0.967	1.27	1.314	1.289	0.409	0.42	0.42	0.859	0.849	0.87	0.925	0.909
Capana00g000465	187	K	OLP1_SOLLC Osmotin-like protein OS=Solanum lycopersicum PE=1 SV=1	---	1	8.60138e-33	182.52	SHGGHGPVVGCK(1)SGCEAYK	2	-1.6361	38	1.404	1.283	1.35	1.567	1.666	1.653	0.392	0.312	0.34	0.796	0.829	0.845	1.13	1.069	1.085	0.683	0.648	0.699	0.619	0.667	0.731	1.228	1.544	1.461	1.179	1	0.967	1.27	1.314	1.289	0.409	0.42	0.42	0.859	0.849	0.87	0.925	0.909
Capana00g000465	211	K	OLP1_SOLLC Osmotin-like protein OS=Solanum lycopersicum PE=1 SV=1	---	1	0.000259204	101.43	NHFNSPQTCK(1)PSTYSQYFK	3	-6.6606	12	0.616				1.334						0.357	0.889			0.836	0.746		0.417	0.731		0.085	1.887	1.971	2.129	1.179	1	0.967	1.27	1.314	1.289	0.409	0.42	0.42	0.859	0.849	0.87	0.925	0.909
Capana00g000559	123	K	VATE_CITLI V-type proton ATPase subunit E OS=Citrus limon GN=VATE PE=2 SV=1	VATE	1	1.82207e-21	62.804	ELLNFSHHEHGIIDSIIHHHHGGYK(1)K	4	-6.3558	5				1.042	1.016									0.859	0.884						1.2				1.312	1.152	1.052	1.13	1.093	1.074	1.061	1.082	1.082	0.956	0.959	1.044	0.923	0.921
Capana00g000559	8	K	VATE_CITLI V-type proton ATPase subunit E OS=Citrus limon GN=VATE PE=2 SV=1	VATE	1	0.010019	48.701	MNDADVSK(1)QIQQMVR	2	-19.919	3	1.272					1.078															0.65				1.312	1.152	1.052	1.13	1.093	1.074	1.061	1.082	1.082	0.956	0.959	1.044	0.923	0.921
Capana00g000559	148	K	VATE_CITLI V-type proton ATPase subunit E OS=Citrus limon GN=VATE PE=2 SV=1	VATE	1	1.07459e-23	141.87	K(1)HDVHLVEHVLEAVK	2	-4.2851	56	1.268	1.158	1.218	1.328	1.321	1.599	0.971	0.973	0.938	0.828	0.896	0.871	1.207	1.097	1.155	0.963	0.97	0.951	0.948	0.894	0.91	0.509	0.517	0.51	1.312	1.152	1.052	1.13	1.093	1.074	1.061	1.082	1.082	0.956	0.959	1.044	0.923	0.921
Capana00g000559	48	K	VATE_CITLI V-type proton ATPase subunit E OS=Citrus limon GN=VATE PE=2 SV=1	VATE	1	0.0176838	44.82	LQLVEAEK(1)K	2	-7.1505	2							0.97												1.03						1.312	1.152	1.052	1.13	1.093	1.074	1.061	1.082	1.082	0.956	0.959	1.044	0.923	0.921
Capana00g000606	422	K	ODO1_DICDI 2-oxoglutarate dehydrogenase, mitochondrial OS=Dictyostelium discoideum GN=ogdh PE=3 SV=1	ogdh	1	3.98363e-11	131.22	KPLIVMAPK(1)NLLR	2	0.91055	22	0.894	0.926	0.939	0.81	0.751	0.765	0.728	0.878	1.021	0.678	0.85	1.042	0.716	0.779	0.834	1.407	1.401	1.433	1.379	1.347	1.42				1.074	1.054	1.002	0.9	0.927	0.856	1.215	1.234	1.188	1.151	1.112	1.102	0.912	0.948
Capana00g000623	119	K	YCF1_SOLLC Putative membrane protein ycf1 OS=Solanum lycopersicum GN=ycf1-A PE=3 SV=1	ycf1-A	1	0.000246074	72.846	GYK(1)NINTSNCEIYDK	2	-1.1885	5													0.721						1.039	1.24
Capana00g000623	108	K	YCF1_SOLLC Putative membrane protein ycf1 OS=Solanum lycopersicum GN=ycf1-A PE=3 SV=1	ycf1-A	1	0.0148008	43.168	DK(1)FHSHLTER	2	-5.3366	1																				1
Capana00g000627	285	K	QORH_ARATH Putative quinone-oxidoreductase homolog, chloroplastic OS=Arabidopsis thaliana GN=At4g13010 PE=2 SV=1	At4g13010	1	0.00128467	99.174	TVIDSK(1)HPLSK	2	-8.5548	16	1.018	1.085	1.006	1.04	0.951	0.994	0.909		1.02	1.219	1.272	1.176		0.792	0.779			0.673				1.048		1.018	1.236	1.171	1.176	1.112	1.202	1.141	1.352	1.244	1.227	1.657	1.692	1.701	0.617	0.57
Capana00g000628	151	K	NTF4_TOBAC Mitogen-activated protein kinase homolog NTF4 OS=Nicotiana tabacum GN=NTF4 PE=2 SV=1	NTF4	1	3.99977e-05	80.026	QSFVEK(1)FPHVNPAAIDLVEK	3	-3.4383	12	0.959	1.035		1.079	1.226	1.308	0.9	0.81			0.828	0.905	1.017			1.051			0.881
Capana00g000656	243	K	Y1491_ARATH DUF246 domain-containing protein At1g04910 OS=Arabidopsis thaliana GN=At1g04910 PE=1 SV=1	At1g04910	1	0.018488	41.824	VESLGNLCK(1)GNVIK	2	-26.426	1																								1
Capana00g000752	75	K	SC23A_DANRE Protein transport protein Sec23A OS=Danio rerio GN=sec23a PE=2 SV=1	sec23a	1	0.00383802	44.045	VQGIIGPCASLDK(1)K	2	-7.8749	1						1
Capana00g000816	238	K	AP1M1_HUMAN AP-1 complex subunit mu-1 OS=Homo sapiens GN=AP1M1 PE=1 SV=3	AP1M1	1	9.97639e-42	151.66	AIDLDDIK(1)FHQCVR	2	-1.344	15	1.161	0.978	1.339	1.462	1.57	1.404	0.524	0.439					1.148	1.139	1.088	0.631	0.63				0.487				1.492	1.369	1.379	1.456	1.47	1.482	0.847	0.925	0.921	0.749	0.651	0.757	1.167	1.105
Capana00g000843	152	K	REFP2_MOUSE RNA and export factor-binding protein 2 OS=Mus musculus GN=Refbp2 PE=1 SV=1	Refbp2	1	0.0195879	64.906	RQDAITGVK(1)R	2	-5.9502	1																								1	0.953	0.916	1.17	1.248	0.881	1.15	1.111	0.83	0.788	1.132	0.885	1.507	0.899	0.973
Capana00g000867	120	K	GDL46_ARATH GDSL esterase/lipase At2g38180 OS=Arabidopsis thaliana GN=At2g38180 PE=2 SV=1	At2g38180	1	1.76656e-26	180.81	LAHHIQGLSEK(1)TR	3	-6.6757	36	0.8	0.99	2.339	0.93		0.943	0.807				0.98	0.942	0.811	0.895	0.716	0.732	0.908		0.715	0.734	0.757	1.351	1.394	1.255	1.165	1.221	0.908	1.127	1.181	1.321	1.163	1.111	1.24	1.015	1.097	1.068	0.912	0.658
Capana00g000871	60	K	PSB6_TOBAC Proteasome subunit beta type-6 OS=Nicotiana tabacum PE=2 SV=1	---	1	0.00086373	85.716	TVTINK(1)DGVNR	2	-7.2266	9					0.679	0.697	0.853	0.774							0.654	0.658		0.513					2.074	2.098
Capana00g000875	590	K	GLGB2_ARATH 1,4-alpha-glucan-branching enzyme 2-2, chloroplastic/amyloplastic OS=Arabidopsis thaliana GN=SBE2.2 PE=1 SV=1	SBE2.2	1	0.0109701	60.709	GIALHK(1)MIR	2	-7.0747	2									1.127										0.873						1.026	1.057	1.095	0.732	0.699	0.72	1.613	1.59	1.631	1.005	0.971	0.973	0.775	0.746
Capana00g000875	171	K	GLGB2_ARATH 1,4-alpha-glucan-branching enzyme 2-2, chloroplastic/amyloplastic OS=Arabidopsis thaliana GN=SBE2.2 PE=1 SV=1	SBE2.2	1	6.99493e-11	140.01	ESIDK(1)YEGGLEAFSR	2	-4.4179	9							1.424			0.994	0.765	0.777				0.957	0.899		1.236	0.898	1.05				1.026	1.057	1.095	0.732	0.699	0.72	1.613	1.59	1.631	1.005	0.971	0.973	0.775	0.746
Capana00g000875	15	K	GLGB2_ARATH 1,4-alpha-glucan-branching enzyme 2-2, chloroplastic/amyloplastic OS=Arabidopsis thaliana GN=SBE2.2 PE=1 SV=1	SBE2.2	1	0.000179441	83.474	SSYK(1)SESGPSTAASSGK	2	-5.3432	16			1.57	0.858		0.886	1.541	1.138	1.333	0.811			0.748	0.761	1.115		0.159		1.186	1.122	1.761	0.353	0.657		1.026	1.057	1.095	0.732	0.699	0.72	1.613	1.59	1.631	1.005	0.971	0.973	0.775	0.746
Capana00g000900	128	K	ADT1_SOLTU ADP,ATP carrier protein, mitochondrial OS=Solanum tuberosum GN=ANT PE=2 SV=1	ANT	1	1.52871e-62	216.04	LSEPYK(1)GIGDCFGR	2	-4.7412	24	1.176	1.153	1.228	1.435	1.577	1.618	0.912	0.904	0.903	0.616	0.543		1.161	1.156	1.332	1.057	1.044	1.004	0.7	0.621	0.629	0.773	0.758	0.7	0.795	0.82	0.887	0.978	1.002	1.061	1.009	0.943	0.998	0.805	0.809	0.851	1.111	1.04
Capana00g000900	327	K	ADT1_SOLTU ADP,ATP carrier protein, mitochondrial OS=Solanum tuberosum GN=ANT PE=2 SV=1	ANT	1	8.26577e-38	192.14	YK(1)SSLDAFSQIVR	2	-6.1786	20	1.044	0.954	0.932	1.336	1.3	1.074	0.812	0.835	0.643	0.797	0.75	0.842	1.337	1.15	0.964	1.146	1.295		0.786		0.764	1.239			0.795	0.82	0.887	0.978	1.002	1.061	1.009	0.943	0.998	0.805	0.809	0.851	1.111	1.04
Capana00g000900	243	K	ADT1_SOLTU ADP,ATP carrier protein, mitochondrial OS=Solanum tuberosum GN=ANT PE=2 SV=1	ANT	1	6.45899e-06	85.622	TLK(1)SDGIAGLYR	2	-7.7064	5																1.074		1.136	0.646				1.096	1.048	0.795	0.82	0.887	0.978	1.002	1.061	1.009	0.943	0.998	0.805	0.809	0.851	1.111	1.04
Capana00g000900	139	K	ADT1_SOLTU ADP,ATP carrier protein, mitochondrial OS=Solanum tuberosum GN=ANT PE=2 SV=1	ANT	1	0.000614588	60.547	TIK(1)DEGFTSLWR	2	-8.0867	3	1.063					1.158	0.779																		0.795	0.82	0.887	0.978	1.002	1.061	1.009	0.943	0.998	0.805	0.809	0.851	1.111	1.04
Capana00g000900	325	K	ADT1_SOLTU ADP,ATP carrier protein, mitochondrial OS=Solanum tuberosum GN=ANT PE=2 SV=1	ANT	1	1.09612e-12	148.9	MMMTSGEAVK(1)YK	2	-8.6874	68		0.634		1.268	1.547	1.138	1.004	0.987	0.932			0.801	1.361	1.129	1.18	0.89	0.732	0.828	0.457	0.46	0.726	1.118	1.467	1.34	0.795	0.82	0.887	0.978	1.002	1.061	1.009	0.943	0.998	0.805	0.809	0.851	1.111	1.04
Capana00g001018	402	K	SIR_SYNY3 Sulfite reductase [ferredoxin] OS=Synechocystis sp. (strain PCC 6803 / Kazusa) GN=sir PE=1 SV=1	sir	1	3.46514e-19	111.98	K(1)FEPCHELPEWEFK	2	-1.4815	32	1.33	1.19	1.244	1.562	1.44		0.806	0.678	1.011	0.748	0.616		1.44	0.989		1.035	0.87	0.924	0.665	0.683	0.769				1.17	1.125	1.131	1.119	1.095	1.138	1.194	1.188	1.173	1.012	1.015	1.015	1.041	1.069
Capana00g001018	453	K	SIR_SYNY3 Sulfite reductase [ferredoxin] OS=Synechocystis sp. (strain PCC 6803 / Kazusa) GN=sir PE=1 SV=1	sir	1	2.36622e-07	90.761	EVIEK(1)YNLNVR	2	-8.8061	17			0.738		1.065	1.255	1.274		1.293	1.174	0.781		1.448	1.057	1.106	0.96	0.963	0.908	1.051	0.714		0.61	0.603		1.17	1.125	1.131	1.119	1.095	1.138	1.194	1.188	1.173	1.012	1.015	1.015	1.041	1.069
Capana00g001018	610	K	SIR_SYNY3 Sulfite reductase [ferredoxin] OS=Synechocystis sp. (strain PCC 6803 / Kazusa) GN=sir PE=1 SV=1	sir	1	4.64866e-06	74.269	VLEPLFYHWK(1)R	2	-5.6255	10	1.225		1.006	1.103	0.985					0.871	0.58		0.842				1.159	1.136			1.092				1.17	1.125	1.131	1.119	1.095	1.138	1.194	1.188	1.173	1.012	1.015	1.015	1.041	1.069
Capana00g001018	178	K	SIR_SYNY3 Sulfite reductase [ferredoxin] OS=Synechocystis sp. (strain PCC 6803 / Kazusa) GN=sir PE=1 SV=1	sir	1	4.67035e-06	126.29	QTFQLHGVLK(1)K	2	-7.3265	21	0.941	1.037	1.004	1.041	1.02	1.019	1.063	0.959	1.124	0.968	0.962	1.034	1.015	0.961	1.008				0.953	0.956	0.883	0.924	1.064	1.065	1.17	1.125	1.131	1.119	1.095	1.138	1.194	1.188	1.173	1.012	1.015	1.015	1.041	1.069
Capana00g001032	144	K	Usp domain-containing protein	---	1	0.0103545	94.806	DHDMK(1)ER	2	-4.1712	13		1.398	1.308	1.368				0.732		0.881		1.127		1.139		0.835	0.766	0.857		0.866	1.023			0.7	0.756	0.891	0.888	0.88	0.895	0.919	0.936	0.915	0.926	0.996	1.005	1.009	1.033	1.047
Capana00g001096	74	K	G3PC_PETHY Glyceraldehyde-3-phosphate dehydrogenase, cytosolic OS=Petunia hybrida GN=GAPC PE=2 SV=1	GAPC	1	0.00240982	83.358	TLLFGEK(1)SVR	2	-6.5394	2									1.132										0.868						0.912	0.961	1.034	1.089	1.078	1.095	1.028	0.995	0.991	1.049	0.94	1.029	1.037	0.996
Capana00g001096	137	K	G3PC_PETHY Glyceraldehyde-3-phosphate dehydrogenase, cytosolic OS=Petunia hybrida GN=GAPC PE=2 SV=1	GAPC	1	1.32835e-07	117.3	TVDGPSMK(1)DWR	2	-5.8949	21	0.656	0.607	0.681	1.054	0.967	0.958	1.106	1.447	1.136	0.837	0.787	0.912		1.075	0.863			1.349	1	1.115	0.922	1.192	1.186	1.15	0.912	0.961	1.034	1.089	1.078	1.095	1.028	0.995	0.991	1.049	0.94	1.029	1.037	0.996
Capana00g001096	57	K	G3PC_PETHY Glyceraldehyde-3-phosphate dehydrogenase, cytosolic OS=Petunia hybrida GN=GAPC PE=2 SV=1	GAPC	1	3.06122e-63	190.37	YDTVHGQWK(1)HHELK(1)VQDEK	3	4.1728	116	1.321	1.287	1.315	1.194	1.268	1.296	1.013	0.952	0.97	0.95	0.962	0.92	1.081	1.074	1.096	0.778	0.716	0.762	0.871	0.843	0.771	0.842	0.854	0.863	0.912	0.961	1.034	1.089	1.078	1.095	1.028	0.995	0.991	1.049	0.94	1.029	1.037	0.996
Capana00g001096	62	K	G3PC_PETHY Glyceraldehyde-3-phosphate dehydrogenase, cytosolic OS=Petunia hybrida GN=GAPC PE=2 SV=1	GAPC	1	7.00654e-11	164.3	YDTVHGQWK(1)HHELK(1)VQDEK	3	4.1728	27	1.517	1.836	1.48	1.934	1.453	1.478	0.745	0.71	0.714	0.652	0.711	0.747	0.785	0.803	0.826	0.608	1.088	1.031	1.128	0.522		0.581		0.65	0.912	0.961	1.034	1.089	1.078	1.095	1.028	0.995	0.991	1.049	0.94	1.029	1.037	0.996
Capana00g001117	392	K	RPOB_HORVU DNA-directed RNA polymerase subunit beta OS=Hordeum vulgare GN=rpoB PE=3 SV=1	rpoB	1	0.00442958	48.701	PYILK(1)LIHQVDDK	3	-6.5978	2				0.893				1.107
Capana00g001117	213	K	RPOB_HORVU DNA-directed RNA polymerase subunit beta OS=Hordeum vulgare GN=rpoB PE=3 SV=1	rpoB	1	0.00208691	69.327	K(1)YEIQTHVTSQGPEK	2	-5.4969	5	0.974			1.664												1.068	0.692	0.601
Capana00g001117	146	K	RPOB_HORVU DNA-directed RNA polymerase subunit beta OS=Hordeum vulgare GN=rpoB PE=3 SV=1	rpoB	1	0.000160505	84.309	NTCMHQK(1)PQVPR	2	-5.8309	14	1.463	1.241	1.393	1.163		1.119	0.734	0.785	0.882				0.811	0.819	1.034		0.812			0.92	0.825
Capana00g001154	308	K	PSBB_TOBAC Photosystem II CP47 chlorophyll apoprotein OS=Nicotiana tabacum GN=psbB PE=3 SV=1	psbB	1	1.61247e-22	135.24	IPEK(1)LAFYDYIGNNPAK	2	-1.1318	14	1.556	0.889		0.444	0.441		1.711	0.636	0.941	1.266	0.91	0.873	1.761			1.229			0.914	0.428					0.9	0.901	0.891	0.956	0.913	0.904	0.841	0.884	0.879	0.895	0.864	0.894	1.135	1.124
Capana00g001154	130	K	PSBB_TOBAC Photosystem II CP47 chlorophyll apoprotein OS=Nicotiana tabacum GN=psbB PE=3 SV=1	psbB	1	0.00767327	51.872	TGK(1)PSLDLPK	2	-7.3601	4	0.877					1.386													0.6			1.137			0.9	0.901	0.891	0.956	0.913	0.904	0.841	0.884	0.879	0.895	0.864	0.894	1.135	1.124
Capana00g001154	438	K	PSBB_TOBAC Photosystem II CP47 chlorophyll apoprotein OS=Nicotiana tabacum GN=psbB PE=3 SV=1	psbB	1	0.000240036	122.44	ATLK(1)SDGVFR	2	-7.9378	21	0.686	0.685	0.73	0.825	0.993	0.817	0.768	0.946				0.987	0.961	1.004	0.727	1.112	1.16	1.092	1.214		0.568	1.581	1.582	1.565	0.9	0.901	0.891	0.956	0.913	0.904	0.841	0.884	0.879	0.895	0.864	0.894	1.135	1.124
Capana00g001154	504	K	PSBB_TOBAC Photosystem II CP47 chlorophyll apoprotein OS=Nicotiana tabacum GN=psbB PE=3 SV=1	psbB	1	0.00187046	90.308	LGDPTTK(1)R	2	-2.6973	10									0.759	0.721			1.183	1.018	1.134		0.578	0.693	0.778				1.616	1.52	0.9	0.901	0.891	0.956	0.913	0.904	0.841	0.884	0.879	0.895	0.864	0.894	1.135	1.124
Capana00g001182	8	K	Regulator of rDNA transcription protein 15	---	1	0.0194925	46.068	MATLGSPK(1)TSAGASGR	2	11.624	1																			1
Capana00g001213	240	K	PSBP_SOLLC Oxygen-evolving enhancer protein 2, chloroplastic OS=Solanum lycopersicum GN=PSBP PE=2 SV=1	PSBP	1	1.53659e-07	117.99	LYICK(1)AQAGDK(1)R	2	-7.4521	17	1.073		0.942			1.28	1.027		1.09		1.168	1.176		1.042	0.989	0.881	0.934	0.818			0.713		0.865		0.664	0.693	0.877	0.784	0.858	0.879	1.115	0.977	0.971	1.139	1.13	1.097	0.981	0.977
Capana00g001213	217	K	PSBP_SOLLC Oxygen-evolving enhancer protein 2, chloroplastic OS=Solanum lycopersicum GN=PSBP PE=2 SV=1	PSBP	1	0	428.11	TADGDEGGK(1)HQLITATVNNGK(1)LYICK	3	2.4532	109	1.099	1.176	0.848	1.037	0.733	1.379	1.019	1.277	1.162	1.101	0.033	1.105	1.231	0.856	0.843	0.885	0.905	0.73	0.822	0.919	0.457	1.816	1.305	1.261	0.664	0.693	0.877	0.784	0.858	0.879	1.115	0.977	0.971	1.139	1.13	1.097	0.981	0.977
Capana00g001213	234	K	PSBP_SOLLC Oxygen-evolving enhancer protein 2, chloroplastic OS=Solanum lycopersicum GN=PSBP PE=2 SV=1	PSBP	1	6.86729e-15	171.34	LYICK(1)AQAGDK(1)R	2	-7.4521	90	1.475	0.374	1.346	0.43	0.409	1.687	1.356	0.3	1.432	0.4	1.657	1.631	0.375	1.525	1.469	1.202	1.251	1.138	0.366	0.42	1.105	0.604	1.474	0.574	0.664	0.693	0.877	0.784	0.858	0.879	1.115	0.977	0.971	1.139	1.13	1.097	0.981	0.977
Capana00g001213	107	K	PSBP_SOLLC Oxygen-evolving enhancer protein 2, chloroplastic OS=Solanum lycopersicum GN=PSBP PE=2 SV=1	PSBP	1	1.65398e-07	126.29	LQVPSK(1)WNPSK	2	0.62671	30	0.696	0.449	0.517	0.761	0.733	0.837	0.954	1.341	1.24		0.749	1.426	1.438		0.853	1.223	1.096	1.077	1.229	0.735	0.777	1.338	1.266	1.267	0.664	0.693	0.877	0.784	0.858	0.879	1.115	0.977	0.971	1.139	1.13	1.097	0.981	0.977
Capana00g001213	112	K	PSBP_SOLLC Oxygen-evolving enhancer protein 2, chloroplastic OS=Solanum lycopersicum GN=PSBP PE=2 SV=1	PSBP	1	0	326.21	WNPSK(1)EVEYPGQVLR	2	3.175	36	0.392	0.396	0.4	0.467	0.434	0.573	0.616	0.877	0.927	1.074	0.908	0.985	0.978	0.714	0.699	0.867	1.005	0.982	1.003	0.937	1.017	2.546	2.635	2.567	0.664	0.693	0.877	0.784	0.858	0.879	1.115	0.977	0.971	1.139	1.13	1.097	0.981	0.977
Capana00g001213	87	K	PSBP_SOLLC Oxygen-evolving enhancer protein 2, chloroplastic OS=Solanum lycopersicum GN=PSBP PE=2 SV=1	PSBP	1	0.00950836	59.67	PK(1)ENTDFMPYNGDGFK	2	-2.2765	2																						1			0.664	0.693	0.877	0.784	0.858	0.879	1.115	0.977	0.971	1.139	1.13	1.097	0.981	0.977
Capana00g001213	229	K	PSBP_SOLLC Oxygen-evolving enhancer protein 2, chloroplastic OS=Solanum lycopersicum GN=PSBP PE=2 SV=1	PSBP	1	2.66621e-194	226.06	TADGDEGGK(1)HQLITATVNNGK(1)LYICK	3	2.4532	56		0.151	1.929	2.612	2.676	2.771	0.364	2.819	1.108	0.507		0.976	0.744	0.233	0.281	0.469	0.39	0.561	0.671	0.216		0.506	0.538	0.478	0.664	0.693	0.877	0.784	0.858	0.879	1.115	0.977	0.971	1.139	1.13	1.097	0.981	0.977
Capana00g001213	164	K	PSBP_SOLLC Oxygen-evolving enhancer protein 2, chloroplastic OS=Solanum lycopersicum GN=PSBP PE=2 SV=1	PSBP	1	5.18387e-06	92.445	VDYLLGK(1)QAYFGK	2	-4.6516	20	0.476			0.656	0.666	0.528	0.747		0.692		0.775	1.026	1.153	0.825	0.559	0.976	1.221	1.073	1.031	1.032	0.827	2.004	1.869	1.862	0.664	0.693	0.877	0.784	0.858	0.879	1.115	0.977	0.971	1.139	1.13	1.097	0.981	0.977
Capana00g001216	420	K	WIT2_ARATH WPP domain-interacting tail-anchored protein 2 OS=Arabidopsis thaliana GN=WIT2 PE=1 SV=1	WIT2	1	0.0015081	83.438	LHEAIQK(1)FTQK	2	-1.5721	12			0.88		0.854	0.726	1.244	1.351	1.2	0.952		0.936			0.951			0.897	1.322				0.688		0.867	0.769	0.712	0.65	0.649	0.69	1.362	1.339	1.444	0.946	0.972	0.89	0.882	0.914
Capana00g001263	99	K	RK27_TOBAC 50S ribosomal protein L27, chloroplastic OS=Nicotiana tabacum GN=RPL27 PE=1 SV=1	RPL27	1	0.0058508	74.486	FEK(1)FGPDR	2	-5.8177	1				1																					1.162	1.161	1.214	1.273	1.241	1.28	1.137	1.216	1.131	0.746	0.733	0.727	1.041	1.043
Capana00g001263	72	K	RK27_TOBAC 50S ribosomal protein L27, chloroplastic OS=Nicotiana tabacum GN=RPL27 PE=1 SV=1	RPL27	1	0.0168972	69.716	GTK(1)FHPGK	2	-3.9417	3														1.137	1.232				0.631						1.162	1.161	1.214	1.273	1.241	1.28	1.137	1.216	1.131	0.746	0.733	0.727	1.041	1.043
Capana00g001272	137	K	DPOA2_BOVIN DNA polymerase alpha subunit B OS=Bos taurus GN=POLA2 PE=2 SV=1	POLA2	1	3.0735e-20	157.77	K(1)HLETITPFGQR	2	-7.2881	22	0.61	0.61	0.682	0.564	0.706	0.627	0.718		0.718	0.741	0.985	0.836		0.734	0.393	0.617	0.43	0.554	0.976	1.147	1.084	2.665	2.828	2.776
Capana00g001306	239	K	GLMM_THEPX Phosphoglucosamine mutase OS=Thermoanaerobacter sp. (strain X514) GN=glmM PE=3 SV=1	glmM	1	8.29132e-13	114.39	VDFMSTYAK(1)HLR	2	-4.2561	23	1.232	1.286	1.211	1.191	1.258	1.204	1.051	1.076	1.057	0.742	0.813		1.089	1.16	1.025	0.829	0.902	0.943	0.823	1.017	1.013	0.674	0.729	0.675	1.099	1.047	1.017	0.977	0.953	0.999	1.214	1.211	1.188	0.948	0.908	0.915	1.105	1.077
Capana00g001358	65	K	VOC domain-containing protein	---	1	0.0168165	47.361	INEARPHDK(1)LPYR	3	-5.288	2				0.881																		1.119			0.977	0.978	1.02	0.85	0.929	0.898	1.143	1.055	1.065	1.165	1.119	1.204	0.894	0.907
Capana00g001365	231	K	CAS_ARATH Calcium sensing receptor, chloroplastic OS=Arabidopsis thaliana GN=CAS PE=1 SV=1	CAS	1	1.02231e-22	117.8	GYK(1)GELTPAQTLDNMCSK	2	-5.6311	8				0.734						0.154		1.075				0.575						1.3	2.162		1.07	1.042	1.013	1.04	1.024	1.014	0.996	1.009	1.018	0.697	0.688	0.717	1.099	1.136
Capana00g001365	272	K	CAS_ARATH Calcium sensing receptor, chloroplastic OS=Arabidopsis thaliana GN=CAS PE=1 SV=1	CAS	1	0.00403981	70.67	LPSSAK(1)NK	2	-1.328	14		1.113	1.122	1.008	0.854	0.836	0.817	0.982	1.167			0.648			1.451		0.87				0.719		1.218	1.195	1.07	1.042	1.013	1.04	1.024	1.014	0.996	1.009	1.018	0.697	0.688	0.717	1.099	1.136
Capana00g001365	146	K	CAS_ARATH Calcium sensing receptor, chloroplastic OS=Arabidopsis thaliana GN=CAS PE=1 SV=1	CAS	1	0.00038728	75.474	TASPVISDATK(1)K	2	-7.7881	3	0.712					1.062							1.226												1.07	1.042	1.013	1.04	1.024	1.014	0.996	1.009	1.018	0.697	0.688	0.717	1.099	1.136
Capana00g001365	135	K	CAS_ARATH Calcium sensing receptor, chloroplastic OS=Arabidopsis thaliana GN=CAS PE=1 SV=1	CAS	1	1.6335e-17	121.39	QAGEEVLK(1)TASPVISDATK	2	-3.1279	17	0.931	1.053	1.313	1.133	0.905	0.942		0.761	0.743				1.178	1.359	1.457		0.74	0.726	0.424			1.024	1.257	1.054	1.07	1.042	1.013	1.04	1.024	1.014	0.996	1.009	1.018	0.697	0.688	0.717	1.099	1.136
Capana00g001388	80	K	COQ9_XENTR Ubiquinone biosynthesis protein COQ9, mitochondrial OS=Xenopus tropicalis GN=coq9 PE=2 SV=1	coq9	1	0.00200953	81.799	THYTETDEK(1)FSSR	2	-6.2376	6			1.389	0.885	1.118						0.879				0.845				0.883						1.065	0.812	1.211	0.92	1.047	0.974	0.874	1.061	1.021	1.094	1.096	0.958	1.02	1.054
Capana00g001433	28	K	RBL_LAVLA Ribulose bisphosphate carboxylase large chain (Fragment) OS=Lavandula lanata GN=rbcL PE=3 SV=1	rbcL	1	0.00248246	63.212	EYK(1)LIYYTPEYQTK	2	-19.992	1				1
Capana00g001441	68	K	NCS_THLFG S-norcoclaurine synthase OS=Thalictrum flavum subsp. glaucum PE=1 SV=1	---	1	2.54745e-06	123.42	EK(1)FVLVDDEKR	2	-6.6141	4											0.669											1.077	1.171	1.082	0.714	0.719	0.698	0.955	0.86	0.81	0.837	1.09	1.022	1.289	1.256	1.237	0.876	0.916
Capana00g001453	89	K	RK22_NICTO 50S ribosomal protein L22, chloroplastic OS=Nicotiana tomentosiformis GN=rpl22 PE=3 SV=1	rpl22	1	0.00986683	60.547	AEVNGGTTVK(1)K	2	-9.1454	2				0.977									1.023												1.099	1.069	1.089	1.199	1.188	1.211	0.965	0.935	0.973	0.771	0.778	0.754	1.12	1.115
Capana00g001454	102	K	CYF_ATRBE Apocytochrome f OS=Atropa belladonna GN=petA PE=3 SV=1	petA	1	0.000341248	108.4	NVHFLK(1)YLIYVGGNR	2	-19.743	15	0.953		0.947	0.723			0.663	0.263				0.65		0.545	1.022	1.72	1.464	1.117	1.351	1.054	1.058		1.469
Capana00g001461	232	K	CYSKP_CAPAN Cysteine synthase, chloroplastic/chromoplastic OS=Capsicum annuum PE=2 SV=1	---	1	7.55396e-07	89.359	IHYETTGPEIWEDTK(1)GK	2	0.85405	1														1											0.973	0.907	0.905	0.969	0.985	1.005	1.104	1.079	1.095	1.087	1.077	1.087	0.971	0.942
Capana00g001461	108	K	CYSKP_CAPAN Cysteine synthase, chloroplastic/chromoplastic OS=Capsicum annuum PE=2 SV=1	---	1	2.7376e-15	112.7	LEIMEPCCSVK(1)DR	2	-4.8697	37	1.013	0.968	1.044	1.099		1.11	1.105	1.126	1.086	0.888	0.828	0.903	1.017	0.965	1.022	0.986	0.953	0.916	1.09	1.028	1.051	0.921	0.941	0.939	0.973	0.907	0.905	0.969	0.985	1.005	1.104	1.079	1.095	1.087	1.077	1.087	0.971	0.942
Capana00g001503	345	K	RD21A_ARATH Cysteine proteinase RD21a OS=Arabidopsis thaliana GN=RD21A PE=1 SV=1	RD21A	1	9.68147e-18	145.08	NSWGK(1)SWGEHGYLK	2	-3.8438	23	1.39	1.499	1.489	1.747	1.793		0.859	0.775	0.809	0.904	1.071	0.994	1.143	1.141	1.065	0.777	0.726	0.678	0.42	0.599	0.504	0.875	0.816	0.923	0.923	0.958	0.944	1.09	1.12	1.066	0.831	0.881	0.871	1.141	1.171	1.226	0.85	0.806
Capana00g001529	142	K	RL72_ARATH 60S ribosomal protein L7-2 OS=Arabidopsis thaliana GN=RPL7B PE=1 SV=1	RPL7B	1	0.00797338	44.045	VEPYVTYGYPNLK(1)SIK	2	-1.8558	1														1											1.056	1.176	1.128	1.128	1.104	1.13	1.034	1.034	1.025	0.959	0.981	0.963	1.067	1.105
Capana00g001653	658	K	SUBL_ARATH Subtilisin-like protease OS=Arabidopsis thaliana GN=ARA12 PE=1 SV=1	ARA12	1	0.0140227	51.531	TVTNVGAGAAK(1)YK	2	-5.5151	2				0.872	1.128																				1.393	1.427	1.521	1.46	1.572	1.562	1.719	1.691	1.645	1.742	1.676	1.686	0.411	0.416
Capana00g001661	457	K	ATPBM_NICPL ATP synthase subunit beta, mitochondrial OS=Nicotiana plumbaginifolia GN=ATPB PE=1 SV=1	ATPB	1	0.000271312	87.251	GVQK(1)VLQNYK	2	-6.6662	15						0.773			1.173	0.991	0.751	1.007	1.022	0.839		0.719	0.634	0.73	1.261	0.973		1.13	1.643	1.352	0.8	0.807	0.852	0.813	0.822	0.81	0.919	0.919	0.931	1.137	1.106	1.091	0.969	0.98
Capana00g001661	188	K	ATPBM_NICPL ATP synthase subunit beta, mitochondrial OS=Nicotiana plumbaginifolia GN=ATPB PE=1 SV=1	ATPB	1	3.88202e-10	156.57	GDIK(1)TDHFLPIHR	2	-5.2397	36	0.763	0.689	0.719	0.749	0.757	0.768	0.964	0.898	0.968	1.03	1.007	1.092	1.072	0.947	0.878	0.964	0.956	0.932	1.06	1.073	1.042	1.581	1.563	1.527	0.8	0.807	0.852	0.813	0.822	0.81	0.919	0.919	0.931	1.137	1.106	1.091	0.969	0.98
Capana00g001668	78	K	ULP_PROTEASE domain-containing protein	---	1	0.00411674	56.202	K(1)QVNIIDEHTQTR	2	-12.585	3	1.36					1.095										0.546
Capana00g001712	479	K	PPR3_ARATH Pentatricopeptide repeat-containing protein At1g02150 OS=Arabidopsis thaliana GN=At1g02150 PE=2 SV=2	At1g02150	1	1.85699e-07	114.39	LCEQDEDTK(1)SK	2	-6.4991	13	1.423	1.446	1.442	1.38	1.3				0.617	0.603	0.527	0.62		0.912	1.236	0.637					0.857				1.241	1.274	1.228	1.155	1.323	1.213	1.083	1.104	1.142	0.91	0.852	0.89	1.035	0.969
Capana00g001727	612	K	RHIE_DICD3 Rhamnogalacturonate lyase OS=Dickeya dadantii (strain 3937) GN=rhiE PE=1 SV=1	rhiE	1	1.51089e-12	140.57	GEVDDK(1)YQYSCENK	2	-4.4037	13		1.221	1.508	1.342	1.273				0.927	1.006		1.045			0.923	0.831					0.501	0.78	0.768	0.875	1.178	1.211	1.239	1.248	1.185	1.264	1.037	1.201	1.131	1.218	1.213	1.334	0.851	0.841
Capana00g001764	306	K	ALF_ORYSJ Fructose-bisphosphate aldolase cytoplasmic isozyme OS=Oryza sativa subsp. japonica GN=FBA PE=1 SV=2	FBA	1	0.00535445	86.243	ALQQSTLK(1)AWAGK	2	-5.3472	9	1.045			1.206	1.19	1.169		0.852									0.714	0.735				0.986		1.101
Capana00g001764	354	K	ALF_ORYSJ Fructose-bisphosphate aldolase cytoplasmic isozyme OS=Oryza sativa subsp. japonica GN=FBA PE=1 SV=2	FBA	0.997721	3.97111e-06	110.48	YAGASNLSEGASESLHVK(0.998)DYK(0.002)Y	3	-5.7821	3				0.897		1.103
Capana00g001764	132	K	ALF_ORYSJ Fructose-bisphosphate aldolase cytoplasmic isozyme OS=Oryza sativa subsp. japonica GN=FBA PE=1 SV=2	FBA	1	0.000150281	114.64	CQK(1)YYEAGAR	2	-1.4183	23	1.266	1.229	1.251	1.282	1.426	1.403	0.97	0.981		1.414		1.365	0.7	0.795	0.771	0.651	0.685		0.812	0.717	0.757	0.524
Capana00g001764	311	K	ALF_ORYSJ Fructose-bisphosphate aldolase cytoplasmic isozyme OS=Oryza sativa subsp. japonica GN=FBA PE=1 SV=2	FBA	1	0.00587066	69.915	AWAGK(1)EENVQK	2	-5.7135	3			0.828		1.317					0.856
Capana00g001764	44	K	ALF_ORYSJ Fructose-bisphosphate aldolase cytoplasmic isozyme OS=Oryza sativa subsp. japonica GN=FBA PE=1 SV=2	FBA	1	2.96596e-15	124.46	LSSIK(1)VENVESNR	2	-5.2096	20	1.166	1.171	1.102	1.392	1.771	1.451	1.012	0.946		1.092	0.9	0.981	0.948	0.941	0.81	0.688	0.589	0.603	0.601				0.96	0.877
Capana00g001764	336	K	ALF_ORYSJ Fructose-bisphosphate aldolase cytoplasmic isozyme OS=Oryza sativa subsp. japonica GN=FBA PE=1 SV=2	FBA	1	3.15944e-238	253.8	ANSEATLGK(1)YAGASNLSEGASESLHVK	3	-2.9544	45		1.489	1.47	1.498	1.7	1.23	1.539	0.642	1.223	1.345	0.72	1.072	1.029	1.49	0.881	1.037	0.665	0.411	0.832	0.316	0.342		0.415	0.652
Capana00g001764	14	K	ALF_ORYSJ Fructose-bisphosphate aldolase cytoplasmic isozyme OS=Oryza sativa subsp. japonica GN=FBA PE=1 SV=2	FBA	1	1.32315e-15	177.41	YADELIK(1)NAAYIGTPGK	2	8.7528	22		1.117	1.203	1.604	1.616	1.558	0.794	0.877		1.151	1.013	1.137	1.226	0.983	0.866	0.844	0.901	0.659		0.658	0.587	0.78	1.019	0.405
Capana00g001858	167	K	TNKS1_HUMAN Tankyrase-1 OS=Homo sapiens GN=TNKS PE=1 SV=2	TNKS	1	4.03214e-10	130.65	LLLASGACPTK(1)TNIYGK	2	-3.2593	23	1.436	1.436	1.514	1.554	1.493	1.516			0.858	0.899	0.768	0.824	1.054	1.068	1.12	0.778	0.846	0.677	0.917	0.839	0.792	0.541	0.517	0.553
Capana00g001862	147	K	CYPH_SOLLC Peptidyl-prolyl cis-trans isomerase OS=Solanum lycopersicum GN=CYP PE=2 SV=1	CYP	1	1.08821e-53	155.57	HVVFGQVVEGFDVIK(1)K	2	0.68796	29	1.144	1.518	1.521	1.478	1.488	1.533	0.999	0.98	0.868	0.752	0.901	0.87	0.818	1.123	1.174	0.742	0.697	0.713	0.812	0.788	0.703	0.758	0.857	0.764	1.075	0.99	1.019	1.117	1.07	1.119	0.968	0.907	0.931	1.023	1.114	1.029	0.892	0.971
Capana00g001862	98	K	CYPH_SOLLC Peptidyl-prolyl cis-trans isomerase OS=Solanum lycopersicum GN=CYP PE=2 SV=1	CYP	1	0	287.14	K(1)HTGPGVLSMANAGPGTNGSQFFICTAK	3	0.88521	87	1.208	1.089	1.293	1.463	1.479	1.517	0.941	1.068	1.005	0.888	0.744	0.755	1.296	1.158	1.243	0.683	0.715	0.702	0.649	0.577	0.634	0.942	0.988	0.965	1.075	0.99	1.019	1.117	1.07	1.119	0.968	0.907	0.931	1.023	1.114	1.029	0.892	0.971
Capana00g001862	56	K	CYPH_SOLLC Peptidyl-prolyl cis-trans isomerase OS=Solanum lycopersicum GN=CYP PE=2 SV=1	CYP	1	1.40025e-46	191.24	PLHYK(1)GSTFHR	3	-4.0452	127	0.987	1.248	1.161	1.486	1.572	1.593	0.73	0.749	0.816	0.962	0.965	1.013	1.17	1.126	1.19	0.746	0.605	0.744	0.851	0.883	0.813	0.733	0.942	0.913	1.075	0.99	1.019	1.117	1.07	1.119	0.968	0.907	0.931	1.023	1.114	1.029	0.892	0.971
Capana00g001862	44	K	CYPH_SOLLC Peptidyl-prolyl cis-trans isomerase OS=Solanum lycopersicum GN=CYP PE=2 SV=1	CYP	1	0.000172669	85.716	ALCTGEK(1)GVGR	2	-7.9424	13					1.896	1.091	0.803	0.738		1.157		1.123		1.307			0.756	1.002	0.854		1.002	0.712		0.559	1.075	0.99	1.019	1.117	1.07	1.119	0.968	0.907	0.931	1.023	1.114	1.029	0.892	0.971
Capana00g001862	96	K	CYPH_SOLLC Peptidyl-prolyl cis-trans isomerase OS=Solanum lycopersicum GN=CYP PE=2 SV=1	CYP	1	0.000497095	133.9	FADENFK(1)R	2	5.1672	25	0.464	0.866	0.734	0.5	1.505	1.641	1.379	1.443	1.145	1.323	0.863	1.273	1.437	1.262	1.108	0.768	0.667	0.642	0.699	0.324	0.818	0.911	1.168	1.057	1.075	0.99	1.019	1.117	1.07	1.119	0.968	0.907	0.931	1.023	1.114	1.029	0.892	0.971
Capana00g001862	31	K	CYPH_SOLLC Peptidyl-prolyl cis-trans isomerase OS=Solanum lycopersicum GN=CYP PE=2 SV=1	CYP	1	3.36038e-07	102.26	VVMELFANDVPK(1)TAENFR	2	2.9519	17					0.713	0.832					0.562	0.468	1.432	1.577		1.016	0.972	1.098	1.116		0.713	1.485	1.008	1.009	1.075	0.99	1.019	1.117	1.07	1.119	0.968	0.907	0.931	1.023	1.114	1.029	0.892	0.971
Capana00g001880	271	K	Y1223_SYNY3 Epimerase family protein slr1223 OS=Synechocystis sp. (strain PCC 6803 / Kazusa) GN=slr1223 PE=3 SV=2	slr1223	1	0.00312044	105.36	LHADK(1)HQIR	2	3.5254	20	1.336	1.288	1.371	1.186					1.096	0.47			0.766	1.202	1.46		0.797	1.018	0.711		0.853	0.678		0.769	0.908	0.993	0.921	1.044	1.005	1.023	1.179	1.199	1.154	0.838	0.856	0.838	1.016	1.005
Capana00g001921	170	K	Y4967_ARATH Uncharacterized oxidoreductase At4g09670 OS=Arabidopsis thaliana GN=At4g09670 PE=1 SV=1	At4g09670	1	7.28819e-20	197.79	SVHSTFAYLGDTEFLK(1)NDIR	3	-4.0358	12	1.564		0.235			0.388	1.546	0.978	1.329	2.063			1.499		0.238	0.879	0.519	0.762							0.798	0.752	0.736	0.748	0.746	0.762	0.851	0.868	0.833	0.926	0.895	0.909	1.156	1.163
Capana00g001921	96	K	Y4967_ARATH Uncharacterized oxidoreductase At4g09670 OS=Arabidopsis thaliana GN=At4g09670 PE=1 SV=1	At4g09670	0.999954	0.0137994	50.09	K(1)HVLLEKPVALNVK	3	-5.8736	3	0.515												1.674			0.811									0.798	0.752	0.736	0.748	0.746	0.762	0.851	0.868	0.833	0.926	0.895	0.909	1.156	1.163
Capana00g001922	34	K	Y4967_ARATH Uncharacterized oxidoreductase At4g09670 OS=Arabidopsis thaliana GN=At4g09670 PE=1 SV=1	At4g09670	1	0.00199048	86.205	GDTEFLK(1)NNIR	2	37.564	3										0.873									1.45	0.677
Capana00g002001	121	K	BLC_CITFR Outer membrane lipoprotein blc OS=Citrobacter freundii PE=3 SV=1	---	1	0.00093022	89.123	K(1)YLWILCR	2	-10.724	6		1.082	0.664				0.943			1.641		1.195	0.474												1.111	0.976	0.98	1.043	0.935	0.978	1.328	1.277	1.326	1.631	1.616	1.589	0.651	0.669
Capana00g002006	40	K	Nicotiana tabacum ORF	---	1	0.00644539	92.732	ALRPK(1)FNVLSR	2	1.7732	2	1.145	0.855
Capana00g002007	347	K	ACCH3_SOLLC 1-aminocyclopropane-1-carboxylate oxidase homolog OS=Solanum lycopersicum GN=ACO3 PE=2 SV=1	ACO3	1	2.44887e-09	99.276	STTVIDYTK(1)YVHSR	2	-3.131	17	1.113	1.135	1.222	1.199		1.074			0.795		0.748		1.121	1.184	1.027	0.782	0.714	0.865		1.031	0.933		1	1.058	0.947	0.892	0.911	0.941	0.896	0.928	0.741	0.799	0.735	0.915	0.978	0.928	1.028	1.043
Capana00g002019	334	K	PSAA_TOBAC Photosystem I P700 chlorophyll a apoprotein A1 OS=Nicotiana tabacum GN=psaA PE=3 SV=2	psaA	1	0.000198938	127.03	GIGHGLK(1)DILEAHK	3	-6.1241	14			0.771	0.823	0.948					0.678			1.118	1.083		0.78		0.961	0.609	0.516	0.488	1.641	1.863	1.723
Capana00g002110	55	K	LACS7_ARATH Long chain acyl-CoA synthetase 7, peroxisomal OS=Arabidopsis thaliana GN=LACS7 PE=1 SV=2	LACS7	1	0.00398325	93.467	LQTGK(1)WNVYR	2	0.20739	16	0.554	0.567	0.636			1.011	0.907		1.453		0.891		1.496	1.24	1.067	1.204	1.132	1.119	1.117	0.855	0.751				1.234	1.175	1.131	1.165	1.172	1.194	1.076	1.069	1.129	1.011	0.897	0.89	1.2	1.068
Capana00g002111	379	K	AMPP1_SORMK Probable Xaa-Pro aminopeptidase P OS=Sordaria macrospora (strain ATCC MYA-333 / DSM 997 / K(L3346) / K-hell) GN=AMPP PE=3 SV=1	AMPP	1	0.0100479	57.032	YPWNSATK(1)SR	2	-9.1422	1															1										1.117	1.094	1.037	1.083	1.057	1.063	1.111	1.122	1.147	0.987	0.943	0.963	1.04	1.067
Capana00g002117	148	K	RK34_ARATH 50S ribosomal protein L34, chloroplastic OS=Arabidopsis thaliana GN=RPL34 PE=2 SV=1	RPL34	1	0.000271157	83.358	WDLCPK(1)SSPR	2	-6.1302	18	1.006	1.016	1.149	1.751	1.462	1.623	0.664	0.708	0.78	0.541			1.422	1.092	1.202	1.018	1.013		0.604		0.62			0.329
Capana00g002117	100	K	RK34_ARATH 50S ribosomal protein L34, chloroplastic OS=Arabidopsis thaliana GN=RPL34 PE=2 SV=1	RPL34	1	0.000572972	121.67	K(1)YALCQTK	2	-5.2851	17	1.293	1.346		1.438	1.551	1.419	0.822	0.772	0.827	0.5		0.46		1.249	1.336	0.873	0.869	0.89	0.68		0.675
Capana00g002117	107	K	RK34_ARATH 50S ribosomal protein L34, chloroplastic OS=Arabidopsis thaliana GN=RPL34 PE=2 SV=1	RPL34	1	0.00160008	72.492	YALCQTK(1)R	2	-6.4598	3					1.336								1.005			0.659
Capana00g002157	395	K	FURH_VIBFR Furcatin hydrolase OS=Viburnum furcatum PE=1 SV=1	---	1	0.00424276	62.271	FGINFIDYK(1)NNLK	2	3.0436	4											1.33	0.735	0.836			1.099									0.942	0.792	0.818	0.661	0.766	0.779	1.098	1.036	1.043	1.248	1.252	1.239	1.109	1.101
Capana00g002241	149	K	VIPI_SCHPO Protein vip1 OS=Schizosaccharomyces pombe (strain 972 / ATCC 24843) GN=vip1 PE=1 SV=1	vip1	1	1.6396e-32	196.38	SFDEK(1)HQLTSTASAK	2	1.0212	38	1.393	1.508	1.483	1.369	1.355	1.241	0.806	0.772	0.805	0.955	1.024	1.006	1.079	1.123	1.186	0.923	1.023	0.963	0.978	0.967	0.912	0.407	0.36	0.362		0.937	0.912	1.071	0.775	0.954	0.775		0.93		0.791	0.815	0.825
Capana00g002249	113	K	AGD14_ARATH Probable ADP-ribosylation factor GTPase-activating protein AGD14 OS=Arabidopsis thaliana GN=AGD14 PE=1 SV=2	AGD14	1	0.00867193	60.547	DFIK(1)HVYVDR	2	-6.4416	6			1.074		1.337							0.838	1.021			0.991		0.738							0.961	1.076	1.104	1.09	1.089	1.195	0.86	0.89	1.009	1.031	0.907	0.956	1.209	1.215
Capana00g002259	184	K	IDH1_ARATH Isocitrate dehydrogenase [NAD] regulatory subunit 1, mitochondrial OS=Arabidopsis thaliana GN=IDH1 PE=1 SV=2	IDH1	1	0.000493959	90.689	IAK(1)YAFEYAYLNNR	2	-1.9403	6			1.041	1.436	1.223								1.073		0.641		0.585								0.981	0.966	0.977	1	1.068	1.066	1.036	1.045	1.049	1.166	1.097	1.087	0.882	0.9
Capana00g002264	61	K	AB hydrolase-1 domain-containing protein	---	1	0.00121415	67.548	HK(1)FVFIHGFDCVR	3	-8.1421	9		0.669		0.948									1.285		1.414	1.049	1.041	1.071		0.828	0.695				0.535	0.78	0.95	0.675	0.705	0.719	0.839	0.735	0.786	0.509	0.512	0.576	1.421	1.413
Capana00g002266	86	K	AB hydrolase-1 domain-containing protein	---	1	0.00865608	51.872	HLAYK(1)EFGVPR	2	-7.7668	1				1																					1.088	1.136	0.969	1.197	1.241	1.221	0.93	0.961	0.914	0.714	0.896	0.725	1.083	1.073
Capana00g002379	84	K	MBD10_ARATH Methyl-CpG-binding domain-containing protein 10 OS=Arabidopsis thaliana GN=MBD10 PE=1 SV=1	MBD10	1	0.015343	61.577	ATETPESATPSK(1)K	2	-8.8002	4												1.293				0.849							0.98	0.879	0.751	0.774	0.682	0.576	0.517	0.49	1.064	1.137	1.184	1.325	1.329	1.265	0.752	0.693
Capana00g002379	109	K	MBD10_ARATH Methyl-CpG-binding domain-containing protein 10 OS=Arabidopsis thaliana GN=MBD10 PE=1 SV=1	MBD10	1	1.54415e-53	188.88	EDGDEQEAEAATK(1)K	2	-8.0539	10	0.685		0.259							0.641				0.82	0.84	1.165	1.015				2.6	1.038		0.937	0.751	0.774	0.682	0.576	0.517	0.49	1.064	1.137	1.184	1.325	1.329	1.265	0.752	0.693
Capana00g002379	96	K	MBD10_ARATH Methyl-CpG-binding domain-containing protein 10 OS=Arabidopsis thaliana GN=MBD10 PE=1 SV=1	MBD10	1	0.000543733	109.47	GAK(1)EDGDEQEAEAATK	2	-5.1876	3										0.483									1.045	1.472					0.751	0.774	0.682	0.576	0.517	0.49	1.064	1.137	1.184	1.325	1.329	1.265	0.752	0.693
Capana00g002390	232	K	SUCD_METS5 Succinate-semialdehyde dehydrogenase (acetylating) OS=Metallosphaera sedula (strain ATCC 51363 / DSM 5348) GN=Msed_1424 PE=1 SV=1	Msed_1424	1	0.00361673	78.157	AK(1)FLGATHCVNASK	2	-5.9988	11	1.082	1.097	1.116		1.134	0.915								1.454	1.373		0.767	0.825	0.542	0.695					1.175	1.037	1.013	1.2	1.067	1.1	0.968	0.906	0.927	0.381	0.398	0.399	1.246	1.265
Capana00g002436	735	K	PSMD1_MOUSE 26S proteasome non-ATPase regulatory subunit 1 OS=Mus musculus GN=Psmd1 PE=1 SV=1	Psmd1	1	0.00427254	90.689	IVLDK(1)HEDTMSK	2	-4.2902	8		1.371					1.047		1.002	0.87		0.92			0.794			0.869	1.127						1.41	1.187	1.119	0.971	0.979	0.942	1.087	1.133	1.216	1.043	1.056	1.051	0.787	0.825
Capana00g002459	159	K	SYST_SOLLC Systemin OS=Solanum lycopersicum PE=1 SV=1	---	1	0.0093961	96.957	VEYEEREEK(1)K	2	-8.0836	1																							1		1.068	1.023	0.959	0.919	0.899	0.883	0.906	0.893	0.946	1.173	1.105	1.175	1.041	1.048
Capana00g002459	150	K	SYST_SOLLC Systemin OS=Solanum lycopersicum PE=1 SV=1	---	1	0.00468401	62.705	GDDALEIPK(1)VEYEER	2	-5.8594	2															0.935		1.065								1.068	1.023	0.959	0.919	0.899	0.883	0.906	0.893	0.946	1.173	1.105	1.175	1.041	1.048
Capana00g002479	121	K	RL141_ARATH 60S ribosomal protein L14-1 OS=Arabidopsis thaliana GN=RPL14A PE=2 SV=1	RPL14A	1	0.012432	63.397	TK(1)WENSSWGR	2	-6.2992	1				1																					0.723	0.943	1.079	1.215	1.214	1.37	0.883	0.907	0.854	0.798	0.825	0.771	1.26	1.213
Capana00g002500	373	K	COTA_BACSU Spore coat protein A OS=Bacillus subtilis GN=cotA PE=1 SV=4	cotA	1	0.00304474	66.485	NLIK(1)YPSPDVSEAASNTR	2	5.8932	8				1.235	1.125	1.458		0.712			0.77	1.005	0.885	0.81											0.846	1.256	1.06		1.461	1.268				0.933	0.665			0.512
Capana00g002515	116	K	Y1926_ARATH UPF0678 fatty acid-binding protein-like protein At1g79260 OS=Arabidopsis thaliana GN=At1g79260 PE=1 SV=1	At1g79260	1	1.8768e-07	81.335	LK(1)SELVGNASK	2	-7.7831	7	0.706	0.947			0.862	0.986			0.483														1.525	1.491	1.261	1.099	1.206	0.942	0.907	0.898	0.944	0.713	1.046	1.355	1.119	1.214	0.865	0.755
Capana00g002531	250	K	CYPR1_CYNCA Cyprosin (Fragment) OS=Cynara cardunculus GN=CYPRO1 PE=1 SV=2	CYPRO1	1	0.000340256	90.689	HFK(1)GVHTYVPVTHK	3	-6.2547	10		1.084		1.108	1.305		0.643			0.842					1.107			0.685			0.698	1.254		1.275	1.045	1.045	1.016	1.038	1.028	1.122	0.955	0.952	0.897	0.923	0.98	0.958	1.008	0.95
Capana00g002531	411	K	CYPR1_CYNCA Cyprosin (Fragment) OS=Cynara cardunculus GN=CYPRO1 PE=1 SV=2	CYPRO1	1	0.00121148	51.531	IFDYINK(1)LCDR	2	-3.2967	1					1																				1.045	1.045	1.016	1.038	1.028	1.122	0.955	0.952	0.897	0.923	0.98	0.958	1.008	0.95
Capana00g002531	247	K	CYPR1_CYNCA Cyprosin (Fragment) OS=Cynara cardunculus GN=CYPRO1 PE=1 SV=2	CYPRO1	0.999999	0.000756466	60.734	NAKEEEGGELVFGGVDPK(1)HFK	3	-5.0808	8		1.119	0.9	1.188		1.181							0.941	1	0.874							0.798			1.045	1.045	1.016	1.038	1.028	1.122	0.955	0.952	0.897	0.923	0.98	0.958	1.008	0.95
Capana00g002547	269	K	DUF4042 domain-containing protein	---	1	0.00360026	88.181	GACNTPYGK(1)TR	2	-7.4722	4	1.119	1.148				1.253																	0.479
Capana00g002602	745	K	APBLA_ARATH Beta-adaptin-like protein A OS=Arabidopsis thaliana GN=BETAA-AD PE=1 SV=1	BETAA-AD	1	0.00041555	87.895	AALEPNAFQQK(1)WR	2	-0.092085	17	0.617			0.973	0.884	1.046	0.674	1.093	1.139	0.987	0.889	1.129	0.991	0.792	0.873	1.125		1.146	1.418		1.226				1.199	1.216	1.232	1.069	1.059	1.076	1.059	1.014	1.024	0.886	0.731	0.82	0.962	1.114
Capana00g002624	128	K	LEU32_ARATH 3-isopropylmalate dehydrogenase 2, chloroplastic OS=Arabidopsis thaliana GN=IMDH2 PE=1 SV=1	IMDH2	1	8.59955e-05	96.957	HLK(1)PETGLLQLR	2	-5.9091	14	1.306		1.022	0.766		1.187	0.66	1.055	0.973	1.562		0.847	1.005			0.564	0.971	1.288		0.792					0.944	0.909	0.901	0.94	0.942	0.981	0.968	0.951	0.969	1.113	1.138	1.155	0.901	0.913
Capana00g002624	125	K	LEU32_ARATH 3-isopropylmalate dehydrogenase 2, chloroplastic OS=Arabidopsis thaliana GN=IMDH2 PE=1 SV=1	IMDH2	0.999999	1.62753e-05	135.89	WDNNAK(1)HLKPETGLLQLR	3	-7.6917	41	0.949	1.004	0.975	1.008	1.013	0.992	1.022		1.013	1.159	1.158	1.19	0.831		0.894	1.18	1.157	1.239	1.031	1.051	1.032	0.682	0.713	0.705	0.944	0.909	0.901	0.94	0.942	0.981	0.968	0.951	0.969	1.113	1.138	1.155	0.901	0.913
Capana00g002646	75	K	integrator complex subunit 3 homolog	---	1	0.000396832	73.502	PHDK(1)TLCYVGGDTR	2	-8.22	4		1.449	1.184		0.297										1.069
Capana00g002663	189	K	PSAB_CAPBU Photosystem I P700 chlorophyll a apoprotein A2 OS=Capsella bursa-pastoris GN=psaB PE=3 SV=1	psaB	1	0.000176002	96.946	K(1)DFDYSFPCDGPGR	2	2.228	18	1.021			1.409		1.491			0.863	0.76	0.67	0.817	1.319	1.226	1.263	1.473	1.424	1.395	0.64	0.613		0.532	0.556	0.528
Capana00g002708	189	K	RETOL_ARATH Reticuline oxidase-like protein OS=Arabidopsis thaliana GN=At4g20830 PE=1 SV=2	At4g20830	1	0.00767848	77.072	ILYK(1)WQQVANK	2	-0.18705	3													1.085		0.979		0.936
Capana00g002729	484	K	CPNB4_ARATH Chaperonin 60 subunit beta 4, chloroplastic OS=Arabidopsis thaliana GN=CPN60B4 PE=1 SV=1	CPN60B4	1	0.000280051	81.799	IFSVDNMK(1)YGYNAAR	2	3.9405	13			0.416	1.066	0.92	1.264	1.058		0.938	0.818			0.92			1.231	1.067		1.274	1.127	0.902				1.206	1.135	1.236	1.073	1.15	0.965	1.027	1.008	1.09	0.91	0.899	0.971	1.007	1.117
Capana00g002731	337	K	6PGD_SYNE7 6-phosphogluconate dehydrogenase, decarboxylating OS=Synechococcus elongatus (strain PCC 7942) GN=gnd PE=1 SV=4	gnd	1	5.23218e-68	229.44	VFK(1)SCGVSDILVEQSVDKK	3	-7.4669	21	1.373	1.422	1.377	1.7	1.79	1.752	0.959	0.795	0.84	0.57	0.687	0.576	1.209	1.161	1.306	0.679	0.704	0.604	0.598		0.576		0.323		1.166	1.13	1.085	1.114	1.098	1.07	1.023	1.051	1.09	0.92	0.889	0.926	1.062	1.046
Capana00g002792	962	K	GLGA_PARUW Glycogen synthase OS=Protochlamydia amoebophila (strain UWE25) GN=glgA PE=3 SV=1	glgA	1	0.00121328	83.775	AFNYYK(1)NNADTWK	2	3.9812	13		1.204	1.194		1.208		1.299	1.517	1.56	0.984	0.989	1.023	0.524	0.275			0.731		0.491						0.929	0.889	0.93	0.822	0.821	0.653	1.414	1.581	1.528	0.806	0.643	0.859	0.701	0.894
Capana00g002793	41	K	CB2B_SOLLC Chlorophyll a-b binding protein 1B, chloroplastic OS=Solanum lycopersicum GN=CAB1B PE=3 SV=1	CAB1B	1	1.73507e-121	207.06	AASK(1)PASSGSPWYGPDR	2	-4.7434	22	0.82	0.891	0.795	0.853	1.006	0.852	0.994		1.029	0.909	0.919	0.988		0.982	1.035	0.942	0.74	0.962	0.942	0.844	0.899	1.429	1.539	1.63	0.761	0.79	0.911	0.926	1.035	1.012	1.056	1.007	0.948	0.912	1.043	0.996	0.92	0.924
Capana00g002796	40	K	CB2B_SOLLC Chlorophyll a-b binding protein 1B, chloroplastic OS=Solanum lycopersicum GN=CAB1B PE=3 SV=1	CAB1B	1	0.000322909	100.69	ALK(1)SAPSSSPWYGPDR	2	-4.2777	13						0.822				0.86	0.792	0.861	2.079	1.767	1.618	0.513	0.645			1.032			0.484	0.527	1.701	0.686		1.137	0.809	0.849			0.751		0.967	0.982	1.03	0.705
Capana00g002799	41	K	CB22_TOBAC Chlorophyll a-b binding protein 21, chloroplastic OS=Nicotiana tabacum GN=CAB21 PE=2 SV=1	CAB21	1	4.29271e-82	187.49	AVSK(1)PASSGSPWYGPDR	2	-0.037356	8								0.745			0.521					1.014	0.859		0.956	0.92			1.516	1.468	0.864	0.882	0.843	0.866	0.931	0.9	0.952	0.932	0.903	0.97	0.862	0.966	1.049	1.013
Capana00g002800	41	K	CB2B_SOLLC Chlorophyll a-b binding protein 1B, chloroplastic OS=Solanum lycopersicum GN=CAB1B PE=3 SV=1	CAB1B	1	3.32179e-82	207.06	AVSK(1)PALSGSPWYGPDR	2	-1.4683	16									0.526	0.383			0.988	0.969	0.96	1.057	0.952	0.918		0.528	0.623	1.668	1.694	1.734	0.882	0.871	0.79	0.654	0.661	0.587	0.608	0.581	0.65	0.591	0.543	0.537	0.942	1.161
Capana00g002801	37	K	CB22_TOBAC Chlorophyll a-b binding protein 21, chloroplastic OS=Nicotiana tabacum GN=CAB21 PE=2 SV=1	CAB21	1	0.000202318	97.268	K(1)AVAK(1)PASSGSPWYGPDR	2	3.2056	8	1.07	1.006		0.983	1.055		0.899	0.966	0.926		1.094														0.697	0.835	0.733	1.114	1.041	1.078	1.154	0.944	0.707	0.979	0.858	0.973	1.072	0.985
Capana00g002801	41	K	CB22_TOBAC Chlorophyll a-b binding protein 21, chloroplastic OS=Nicotiana tabacum GN=CAB21 PE=2 SV=1	CAB21	1	1.26471e-22	153.05	K(1)AVAK(1)PASSGSPWYGPDR	2	3.2056	25	1.375	0.374	0.957	0.365	1.507	0.864	0.334	1.434	1.377	0.961	1.352	1.037	0.856		0.939	0.798	0.862		0.833			1.268	1.15	1.356	0.697	0.835	0.733	1.114	1.041	1.078	1.154	0.944	0.707	0.979	0.858	0.973	1.072	0.985
Capana00g002802	41	K	CB22_TOBAC Chlorophyll a-b binding protein 21, chloroplastic OS=Nicotiana tabacum GN=CAB21 PE=2 SV=1	CAB21	1	5.04994e-67	150.93	TASK(1)PAASSSPWYGPDR	2	-4.4832	7						0.518	1.501	1.29										0.548				0.98	1.088	1.076	0.995	0.921	0.948	1.004	0.979	0.949	0.969	0.974	0.99	0.982	0.953	0.956	0.938	0.877
Capana00g002830	429	K	HEM2_ARATH Delta-aminolevulinic acid dehydratase, chloroplastic OS=Arabidopsis thaliana GN=HEMB PE=1 SV=1	HEMB	1	1.4337e-07	85.821	AGGVLK(1)MIDEER	2	-6.7404	20	1.029	0.959	0.927		0.949	1.01	0.748	0.677	0.904	1.229	1.177	1.341		1.074	1.013		0.989	1.016	0.884	1.043	1.113	1.032	0.887		1.138	1.046	1.07	1.065	1.051	1.054	0.991	1.017	1.031	0.959	0.932	0.939	1.071	1.053
Capana00g002830	62	K	HEM2_ARATH Delta-aminolevulinic acid dehydratase, chloroplastic OS=Arabidopsis thaliana GN=HEMB PE=1 SV=1	HEMB	1	1.66902e-24	154.09	EGHDNESGSTPLK(1)K	2	-0.065076	20	1.355	1.137	1.214		1.086	1.367	0.826	0.534	0.95	0.604		0.863		1.43	1.437	0.644	0.917		0.936	0.903		0.886	0.911		1.138	1.046	1.07	1.065	1.051	1.054	0.991	1.017	1.031	0.959	0.932	0.939	1.071	1.053
Capana00g002846	85	K	NQR_SOLTU NAD(P)H:quinone oxidoreductase OS=Solanum tuberosum PE=2 SV=1	---	1	0.000220614	91.245	FDSNGVLTDEETK(1)QR	2	-3.0396	4				1.058	1.022			0.902	1.018
Capana00g002855	109	K	NEP1_NEPGR Aspartic proteinase nepenthesin-1 OS=Nepenthes gracilis GN=nep1 PE=1 SV=1	nep1	1	3.13251e-09	110.88	QILQTPSYIVK(1)AK	2	-5.1006	19		0.777		1.282	0.987	1.031	0.976		0.529	0.665	0.581		1.229	1.079	1.168	1.017	0.992	0.937		0.602	0.62	1.581	1.502	1.443	0.797	0.9	0.95	1.026	1.056	1.122	0.767	0.753	0.758	0.876	0.867	0.867	1.027	1.081
Capana00g002855	267	K	NEP1_NEPGR Aspartic proteinase nepenthesin-1 OS=Nepenthes gracilis GN=nep1 PE=1 SV=1	nep1	1	0.00520146	93.561	LGPK(1)GQPLR	2	-4.6648	15		1.03	0.899	0.929	1.421		0.777		0.687	1.031	0.777	0.917	1.57	1.402				0.677			0.704		1.135	1.045	0.797	0.9	0.95	1.026	1.056	1.122	0.767	0.753	0.758	0.876	0.867	0.867	1.027	1.081
Capana00g002861	109	K	PPA26_ARATH Bifunctional purple acid phosphatase 26 OS=Arabidopsis thaliana GN=PAP26 PE=1 SV=1	PAP26	1	6.38076e-13	148.82	YK(1)SGYIHQCLVSGLQYDTK	3	-6.8363	37		0.978	0.942	1.662	1.751	1.826	0.7		0.717		0.752	0.647	1.441	1.414	1.462	0.624	0.758	0.67			0.51	0.65	0.799	0.698	0.897	0.919	0.944	1.095	1.057	1.13	0.867	0.871	0.905	0.984	0.972	0.956	1.07	1.054
Capana00g002861	256	K	PPA26_ARATH Bifunctional purple acid phosphatase 26 OS=Arabidopsis thaliana GN=PAP26 PE=1 SV=1	PAP26	1	0.000987035	101.45	ASK(1)SSNPLWYAIR	2	-7.5672	1																								1	0.897	0.919	0.944	1.095	1.057	1.13	0.867	0.871	0.905	0.984	0.972	0.956	1.07	1.054
Capana00g002861	292	K	PPA26_ARATH Bifunctional purple acid phosphatase 26 OS=Arabidopsis thaliana GN=PAP26 PE=1 SV=1	PAP26	1	0.000540378	91.939	YTPQWHWLK(1)HELK	2	-2.4312	22	0.982	0.984	1.102	1.418	1.394						0.75		0.939	1.156	1.161			0.712		0.638	0.696	1.069			0.897	0.919	0.944	1.095	1.057	1.13	0.867	0.871	0.905	0.984	0.972	0.956	1.07	1.054
Capana00g002861	133	K	PPA26_ARATH Bifunctional purple acid phosphatase 26 OS=Arabidopsis thaliana GN=PAP26 PE=1 SV=1	PAP26	1	0.006746	57.293	YYYEIGK(1)GDSAR	2	-7.7441	2						0.933							1.067												0.897	0.919	0.944	1.095	1.057	1.13	0.867	0.871	0.905	0.984	0.972	0.956	1.07	1.054
Capana00g002879	134	K	NMCP_ARATH Putative nuclear matrix constituent protein 1-like protein OS=Arabidopsis thaliana GN=At5g65770 PE=2 SV=1	At5g65770	1	0.000987035	68.548	SEHAETK(1)YTADSK	2	-6.2099	3																					1.579		0.476	0.945	1.027	1.12	1.095	0.793	0.974	0.881	1.101	1.204	1.22	1.13	1.073	1.082	0.753	0.789
Capana00g002925	433	K	TCPH_CHICK T-complex protein 1 subunit eta OS=Gallus gallus GN=CCT7 PE=1 SV=1	CCT7	1	2.0983e-23	135.5	SIQGK(1)SQLFINSYAK	2	-4.494	28	1.358	1.256	1.295	1.417	1.349	1.354	1.033	1.072	1.092	0.868	0.873	0.927	1.009	0.99	0.921	1.002	1.066	0.991	0.958	0.974	0.996	0.375	0.419	0.405	1.095	1.097	1.058	1.067	1.093	1.061	0.872	0.928	0.917	0.985	0.985	0.988	1.006	0.978
Capana00g002925	404	K	TCPH_CHICK T-complex protein 1 subunit eta OS=Gallus gallus GN=CCT7 PE=1 SV=1	CCT7	1	9.05019e-05	65.421	AVK(1)NSTVVPGGGAIDMEISR	2	-5.6768	4		1.196		1.249	0.574										0.98										1.095	1.097	1.058	1.067	1.093	1.061	0.872	0.928	0.917	0.985	0.985	0.988	1.006	0.978
Capana00g002943	15	K	URIC1_SOYBN Uricase-2 isozyme 1 OS=Glycine max PE=1 SV=2	---	1	0.00707912	87.895	LDQQHGK(1)SR	2	-6.0916	11	1.446	0.863	0.808				1.357			1.138					0.838		0.716			0.859	0.942		0.955	1.078	1.374	1.31	1.253	1.256	1.224	1.219	1.143	1.174	1.199	1.268	1.342	1.321	0.751	0.738
Capana00g002954	320	K	Y1686_ARATH Uncharacterized membrane protein At1g16860 OS=Arabidopsis thaliana GN=At1g16860 PE=1 SV=1	At1g16860	1	0.000893983	87.942	GWYSK(1)TANPDHR	2	3.4027	4		0.852		1.327									0.821
Capana00g002959	131	K	GLO2D_ARATH Probable hydroxyacylglutathione hydrolase 2, chloroplast OS=Arabidopsis thaliana GN=GLX2-4 PE=2 SV=1	GLX2-4	1	0.00162204	45.587	NLTYILNTHHHYDHTGGNMELK(1)AR	4	-2.144	2		0.914					1.086																		1.051	0.949	0.904	0.855	0.833	0.877	1.052	1.056	1.099	1.077	1.026	1.037	0.919	0.941
Capana00g003007	392	K	PME34_ARATH Probable pectinesterase/pectinesterase inhibitor 34 OS=Arabidopsis thaliana GN=PME34 PE=2 SV=1	PME34	1	8.2055e-06	130.99	DITFENWAGPGK(1)HQAVALR	3	-3.5698	14	0.61		0.562	1.264	1.207	1.588	0.577		2.006	1.521		0.459	1.963	0.373	0.333	1.083							0.455		0.673	0.897	1.23	1.199	1.511	1.507	0.942	1.021	0.951	1.149	1.23	1.202	1.102	1.212
Capana00g003039	206	K	GLUA_DICDI Lysosomal beta glucosidase OS=Dictyostelium discoideum GN=gluA PE=1 SV=2	gluA	1	0.00405268	45.654	VVACAK(1)HFVGDGGTER	2	-5.1295	1			1																						1.002	1.029	1.021	1.007	1.101	1.048	0.959	0.941	0.953	0.863	0.892	0.835	1.1	1.113
Capana00g003043	412	K	CYSZ_CUCMA Citrate synthase, glyoxysomal OS=Cucurbita maxima PE=1 SV=1	---	1	0.00427461	65.404	AALSDEYFVK(1)R	2	-5.5593	2								1.18	0.82																1.028	1.056	0.973	0.933	0.98	1.002	0.923	0.887	0.872	0.873	0.846	0.859	1.097	1.102
Capana00g003043	65	K	CYSZ_CUCMA Citrate synthase, glyoxysomal OS=Cucurbita maxima PE=1 SV=1	---	1	0.00100299	94.791	K(1)YPVQVSEEGTIK	2	-8.5093	14	0.771	0.775		0.816	0.876			0.884	1.052	1.007	0.86	1.285		1.294		1.092			0.849	0.871			1.569		1.028	1.056	0.973	0.933	0.98	1.002	0.923	0.887	0.872	0.873	0.846	0.859	1.097	1.102
Capana00g003055	176	K	ATPE_NICTO ATP synthase epsilon chain, chloroplastic OS=Nicotiana tomentosiformis GN=atpE PE=3 SV=1	atpE	1	0	255.72	GSDIDPQEAQQTLEIAEANVK(1)K	2	2.6204	31			0.379	0.43	0.331	0.346		0.646	0.73	1.306	1.274	1.243	0.865	0.769	0.751	1.041	0.996	1.011	1.353	1.007	1.106		2.151	2.266
Capana00g003058	185	K	GYRB_NICBE DNA gyrase subunit B, chloroplastic/mitochondrial OS=Nicotiana benthamiana GN=GYRB PE=2 SV=1	GYRB	1	5.74408e-06	101.64	QAYYCYDDVELK(1)K	2	-1.1455	3	0.972			1.177			0.851																		1.34	1.335	1.278	1.455	1.306	1.348	1.084	1.125	1.067	0.9	0.923	0.908	0.92	0.955
Capana00g003075	90	K	TPK1_MOUSE Thiamin pyrophosphokinase 1 OS=Mus musculus GN=Tpk1 PE=1 SV=1	Tpk1	1	2.26855e-06	140.57	YKPHAIK(1)GDMDSIR	3	-7.6056	9													0.886	0.861	0.827				0.907	0.871	0.868	1.332	1.298	1.15	1.093	0.674	1.497		1.051
Capana00g003078	8	K	CS domain-containing protein (Fragment)	---	1	6.50954e-07	102.55	SLHPEVK(1)WAQR	2	1.1599	15		1.247			0.681						1.438	0.782			1.134	0.861		1.146				1.04	0.804	0.867	1.029	1.019	1.021	0.908	0.893	0.841	0.719	0.692	0.685	1.097	0.896	0.886	0.964	0.898
Capana00g003078	60	K	CS domain-containing protein (Fragment)	---	1	0.000679426	61.577	LELQDK(1)VNVEESK	2	-5.7698	1									1																1.029	1.019	1.021	0.908	0.893	0.841	0.719	0.692	0.685	1.097	0.896	0.886	0.964	0.898
Capana00g003079	519	K	AB4C_ARATH ABC transporter C family member 4 OS=Arabidopsis thaliana GN=ABCC4 PE=1 SV=2	ABCC4	1	0.00312221	54.584	VIK(1)FQAWEEHFNK	2	7.4446	2																		1.476				0.524			1.109	1.034	0.925	0.861	0.847	0.862	1.297	1.217	1.226	0.741	0.778	0.783	1.057	0.968
Capana00g003079	529	K	AB4C_ARATH ABC transporter C family member 4 OS=Arabidopsis thaliana GN=ABCC4 PE=1 SV=2	ABCC4	1	2.03283e-07	150.53	FQAWEEHFNK(1)R	2	1.1289	22	0.893	0.779	0.891	0.837		0.822	1.102	0.967		0.812	0.784	0.846	0.753	0.893	0.834	1.397	1.44	1.515	1.492	1.489	1.515	0.628	0.628	0.683	1.109	1.034	0.925	0.861	0.847	0.862	1.297	1.217	1.226	0.741	0.778	0.783	1.057	0.968
Capana00g003079	313	K	AB4C_ARATH ABC transporter C family member 4 OS=Arabidopsis thaliana GN=ABCC4 PE=1 SV=2	ABCC4	0.999959	0.00139121	81.335	NWPKPEENSK(1)HPVR	3	-1.3449	16			0.719		0.741	0.802	1.32	1.247	1.304		0.643		0.72	0.771	0.64	1.322	1.281	1.048	1.279	1.059	1.104				1.109	1.034	0.925	0.861	0.847	0.862	1.297	1.217	1.226	0.741	0.778	0.783	1.057	0.968
Capana00g003084	177	K	ABA2_ARATH Xanthoxin dehydrogenase OS=Arabidopsis thaliana GN=ABA2 PE=1 SV=1	ABA2	1	0.013127	46.206	YAVLGLTQNVAAEMGK(1)HGVR	3	-9.015	1							1																		1.504	1.122	1.256	1.202	1.17	1.114	1.21	1.298	1.327	0.936	0.922	1.017	0.794	0.925
Capana00g003085	200	K	ABA2_ARATH Xanthoxin dehydrogenase OS=Arabidopsis thaliana GN=ABA2 PE=1 SV=1	ABA2	1	6.24367e-12	151.08	FAVVGLTQNVAAEMGK(1)HGIR	3	-9.5207	18	1.329	0.847	1.127	1.284	1.195	1.129	1.262	1.356	1.111			0.698	1.346		1.041	0.765		0.598			0.677	0.806	0.73	0.699	1.048	1.018	1.007	1.052	1.024	0.997	1.055	1.065	1.105	0.96	0.979	0.951	1.069	1.043
Capana00g003085	148	K	ABA2_ARATH Xanthoxin dehydrogenase OS=Arabidopsis thaliana GN=ABA2 PE=1 SV=1	ABA2	1	1.05546e-07	105.81	GIFLGIK(1)HAAR	2	-7.3656	24	1.2	1.246	1.235	1.418	1.422	1.188	0.793	0.775	0.814	0.802	0.912	0.833	1.045	1.237	1.215	0.811	0.806	0.809	0.752	0.977	0.856	0.929	0.965	0.96	1.048	1.018	1.007	1.052	1.024	0.997	1.055	1.065	1.105	0.96	0.979	0.951	1.069	1.043
Capana00g003105	36	K	GSTX4_TOBAC Probable glutathione S-transferase OS=Nicotiana tabacum PE=2 SV=1	---	1	4.14478e-09	113.46	STLLLQMNPIHK(1)K	2	2.4685	38	1.174	1.183	1.221	1.18	1.22	1.149	0.913	0.863	0.931	0.885	0.992	0.869	0.938	0.991	0.978		1.066	1.031	0.924	1.006	1.036	0.821	0.821	0.806	1.124	1.042	1.048	1.137	1.113	1.138	1.065	1.178	1.089	0.887	0.788	0.922	0.962	0.926
Capana00g003105	101	K	GSTX4_TOBAC Probable glutathione S-transferase OS=Nicotiana tabacum PE=2 SV=1	---	1	5.19055e-41	175.54	IWSSK(1)VEVHETANK	2	-2.8406	22	1.285	1.39	1.23	1.346	1.1		0.823	0.797		0.801	0.902	0.761	1.031	1.174	1.049	0.989	0.942	0.947	0.69	0.775	0.739	1.258	0.937	1.037	1.124	1.042	1.048	1.137	1.113	1.138	1.065	1.178	1.089	0.887	0.788	0.922	0.962	0.926
Capana00g003111	231	K	GLO1_ARATH Peroxisomal (S)-2-hydroxy-acid oxidase GLO1 OS=Arabidopsis thaliana GN=GLO1 PE=1 SV=1	GLO1	1	0.00124827	61.042	MPILVK(1)GVLTAEDAR	2	-4.5194	2														0.078								1.922			0.748	0.835	0.896	0.892	0.931	0.994	1.135	1.038	1.042	1.136	1.093	1.052	1.06	1.018
Capana00g003129	149	K	HEBP2_HUMAN Heme-binding protein 2 OS=Homo sapiens GN=HEBP2 PE=1 SV=1	HEBP2	1	0.00297824	103.8	GLHLQK(1)WSK	2	4.7732	24	0.875		0.927	1.091	1.238	1.263	0.734	0.754	0.806	0.801	0.794	0.908	1.349	1.305	1.341	0.826	0.864	0.792	0.854	0.833	0.882	1.266	1.265	1.234	0.975	0.959	0.906	1	0.994	0.929	0.901	0.919	0.896	0.975	0.93	0.966	1.011	0.998
Capana00g003129	152	K	HEBP2_HUMAN Heme-binding protein 2 OS=Homo sapiens GN=HEBP2 PE=1 SV=1	HEBP2	1	0.00401184	91.783	WSK(1)TYVAVR	2	-7.6771	9									0.732	0.951		0.885	1.059			0.712			0.624			1.371	1.29	1.376	0.975	0.959	0.906	1	0.994	0.929	0.901	0.919	0.896	0.975	0.93	0.966	1.011	0.998
Capana00g003129	213	K	HEBP2_HUMAN Heme-binding protein 2 OS=Homo sapiens GN=HEBP2 PE=1 SV=1	HEBP2	1	8.91111e-69	199.91	SQAADNTAIYTVAQYNSPFEFK(1)NR	3	-1.8334	6	1.139						1.454	1.297	1.089				0.862							0.16					0.975	0.959	0.906	1	0.994	0.929	0.901	0.919	0.896	0.975	0.93	0.966	1.011	0.998
Capana00g003130	193	K	HEBP2_HUMAN Heme-binding protein 2 OS=Homo sapiens GN=HEBP2 PE=1 SV=1	HEBP2	1	0.00198594	53.782	SQAADDTTVYK(1)VAQYNSPSEFNNR	3	1.1279	1													1														0.221										1.212	1.874
Capana00g003131	87	K	HEBP2_HUMAN Heme-binding protein 2 OS=Homo sapiens GN=HEBP2 PE=1 SV=1	HEBP2	1	6.50984e-11	113.46	LFDYIQGK(1)NSYK	2	-8.4185	18	0.885		0.821	0.681		0.875	0.954		0.444	1.18	0.947	1.122	1.404	0.99	0.77	1.115	0.956	0.999		0.779		1.457		1.622	0.828	0.867	0.85	0.917	0.865	0.935	0.943	0.928	0.914	1.034	0.993	0.985	0.985	0.971
Capana00g003131	204	K	HEBP2_HUMAN Heme-binding protein 2 OS=Homo sapiens GN=HEBP2 PE=1 SV=1	HEBP2	1	1.15171e-12	131.22	AAYNSPFEFK(1)NR	2	-13.332	24	0.815	0.865	0.759	1.387	1.119	1.652	1.044	1.183		1.096	0.709	1.353	1.232	1.091	1.018	1.004	0.878	1.028	1.022	0.728	0.774		0.587	0.654	0.828	0.867	0.85	0.917	0.865	0.935	0.943	0.928	0.914	1.034	0.993	0.985	0.985	0.971
Capana00g003131	125	K	HEBP2_HUMAN Heme-binding protein 2 OS=Homo sapiens GN=HEBP2 PE=1 SV=1	HEBP2	0.942187	0.0110792	55.604	K(0.942)NQPNPPPAK(0.061)GLHLQK(0.997)WGK	3	2.1733	2				1.07											0.93										0.828	0.867	0.85	0.917	0.865	0.935	0.943	0.928	0.914	1.034	0.993	0.985	0.985	0.971
Capana00g003131	140	K	HEBP2_HUMAN Heme-binding protein 2 OS=Homo sapiens GN=HEBP2 PE=1 SV=1	HEBP2	1	0.0029832	113.14	GLHLQK(1)WGK	2	3.2434	44	0.708	0.769	0.643	1.857	0.78	0.984	0.765	0.956	0.95	1.031	0.749	1.012	1.081	0.949	1.841	0.873	0.787		0.873	0.775	0.56	1.377	1.283	1.397	0.828	0.867	0.85	0.917	0.865	0.935	0.943	0.928	0.914	1.034	0.993	0.985	0.985	0.971
Capana00g003131	143	K	HEBP2_HUMAN Heme-binding protein 2 OS=Homo sapiens GN=HEBP2 PE=1 SV=1	HEBP2	1	0.011878	77.072	WGK(1)TYVAVR	2	-8.3442	3													1.023									1.072		0.905	0.828	0.867	0.85	0.917	0.865	0.935	0.943	0.928	0.914	1.034	0.993	0.985	0.985	0.971
Capana00g003194	376	K	DXS_CAPAN Probable 1-deoxy-D-xylulose-5-phosphate synthase, chloroplastic OS=Capsicum annuum GN=TKT2 PE=2 SV=1	TKT2	1	0.0177693	64.064	AADK(1)YHGVAK	2	-3.6417	2	1.028			0.972																					1.411	1.339	1.286	1.187	1.201	1.234	1.059	1.033	1.059	0.826	0.818	0.821	1.079	1.088
Capana00g003194	382	K	DXS_CAPAN Probable 1-deoxy-D-xylulose-5-phosphate synthase, chloroplastic OS=Capsicum annuum GN=TKT2 PE=2 SV=1	TKT2	1	1.47068e-06	134.2	YHGVAK(1)FDPATGK	2	-8.8714	12	1.249	1.238		1.138		1.183	0.956		0.82		0.781			1.038	1.431	0.711	0.807	0.647							1.411	1.339	1.286	1.187	1.201	1.234	1.059	1.033	1.059	0.826	0.818	0.821	1.079	1.088
Capana00g003212	191	K	ATP7_ARATH Probable ATP synthase 24 kDa subunit, mitochondrial OS=Arabidopsis thaliana GN=At2g21870 PE=1 SV=1	At2g21870	1	1.84462e-08	146.34	KEDLPK(1)YEEQLELK	2	-5.8886	21	0.995			0.609			0.721		0.752		1.447	0.657				1.103			1.361	1.228	1.182			0.944	0.672	0.778	0.761	0.817	0.801	0.838	0.885	0.889	0.858	1.237	1.259	1.222	0.958	0.941
Capana00g003212	57	K	ATP7_ARATH Probable ATP synthase 24 kDa subunit, mitochondrial OS=Arabidopsis thaliana GN=At2g21870 PE=1 SV=1	At2g21870	1	0.00842532	74.486	DIFYEVK(1)NK	2	1.5022	9							0.579	1.248		0.459		1.299				1.072		0.865	1.577	0.819		1.084			0.672	0.778	0.761	0.817	0.801	0.838	0.885	0.889	0.858	1.237	1.259	1.222	0.958	0.941
Capana00g003222	125	K	CHI5_ORYSJ Chitinase 5 OS=Oryza sativa subsp. japonica GN=Cht5 PE=2 SV=1	Cht5	1	1.56322e-41	202.24	SYPNFGTVGSNDDSK(1)R	2	6.3933	26	0.538	0.306	0.674	0.54	0.531	0.626	0.885	0.82	0.758	0.66	0.572	0.606	1.55	1.533	1.486	1.284	1.143	1.169	0.842	0.985		1.894	1.842	1.756	0.668	0.675	0.633	0.699	0.65	0.7	0.606	0.603	0.636	1.146	1.138	1.118	1.058	1.063
Capana00g003266	251	K	PME_ACTDE Pectinesterase OS=Actinidia deliciosa PE=1 SV=1	---	1	2.20469e-24	165.02	GITFENYAGPSK(1)HQAVALR	3	-1.9872	56	0.88	0.74	0.799	1.454	1.447	1.634	0.647	0.896	0.913	0.901	0.551	1.028	1.515	1.099	1.242	0.975	0.771	0.922		0.453	0.439	1.288	1.238	1.168	0.998	0.996	0.976	1.002	1.074	1.058	0.813	0.834	0.821	0.966	0.965	0.965	0.967	0.972
Capana00g003268	92	K	RL192_ARATH 60S ribosomal protein L19-2 OS=Arabidopsis thaliana GN=RPL19B PE=2 SV=1	RPL19B	1	0.00304842	86.205	LPTK(1)VLWMR	2	-9.3159	6									0.825	1.045		0.873					1.102	1.156		0.999					0.784	0.738	0.647	0.638	0.837	0.857	1.093	1.076	1.066	1.259	1.28	0.972	0.866	0.687
Capana00g003268	144	K	RL192_ARATH 60S ribosomal protein L19-2 OS=Arabidopsis thaliana GN=RPL19B PE=2 SV=1	RPL19B	1	0.0156465	44.57	VLMENIHK(1)TK	2	-6.2036	1																					1				0.784	0.738	0.647	0.638	0.837	0.857	1.093	1.076	1.066	1.259	1.28	0.972	0.866	0.687
Capana00g003268	117	K	RL192_ARATH 60S ribosomal protein L19-2 OS=Arabidopsis thaliana GN=RPL19B PE=2 SV=1	RPL19B	1	0.000769508	72.327	IDK(1)HMYHDMYMK	2	-5.5159	16	1.201		0.959						1.231			1.114	0.761		0.583	0.894		1.025	1.148	1.084					0.784	0.738	0.647	0.638	0.837	0.857	1.093	1.076	1.066	1.259	1.28	0.972	0.866	0.687
Capana00g003269	130	K	FUM2_ARATH Fumarate hydratase 2, chloroplastic OS=Arabidopsis thaliana GN=FUM2 PE=2 SV=1	FUM2	1	0.000475888	61.577	GEK(1)HVHPNDHVNR	3	-2.4809	6	0.999		1.25				0.904		1.162		0.794	0.891													1.077	1.201	1.318	1.261	1.296	1.364	1.317	1.396	1.385	1.178	1.188	1.183	0.822	0.763
Capana00g003269	389	K	FUM2_ARATH Fumarate hydratase 2, chloroplastic OS=Arabidopsis thaliana GN=FUM2 PE=2 SV=1	FUM2	1	1.98668e-11	131.54	LLGDASASFEK(1)NCVR	2	-10.514	7				1.241	1.598	1.311		0.981			0.898		0.814										0.156		1.077	1.201	1.318	1.261	1.296	1.364	1.317	1.396	1.385	1.178	1.188	1.183	0.822	0.763
Capana00g003269	126	K	FUM2_ARATH Fumarate hydratase 2, chloroplastic OS=Arabidopsis thaliana GN=FUM2 PE=2 SV=1	FUM2	1	0.00317561	87.251	AAEILGHK(1)R	2	-2.0199	3							1.055	0.931	1.014																1.077	1.201	1.318	1.261	1.296	1.364	1.317	1.396	1.385	1.178	1.188	1.183	0.822	0.763
Capana00g003269	430	K	FUM2_ARATH Fumarate hydratase 2, chloroplastic OS=Arabidopsis thaliana GN=FUM2 PE=2 SV=1	FUM2	1	0.00232652	58.889	IGYDNAAAVAK(1)K	2	-7.6623	2									1.135			0.865													1.077	1.201	1.318	1.261	1.296	1.364	1.317	1.396	1.385	1.178	1.188	1.183	0.822	0.763
Capana00g003275	68	K	DJB11_MOUSE DnaJ homolog subfamily B member 11 OS=Mus musculus GN=Dnajb11 PE=1 SV=1	Dnajb11	1	0.00152589	66.485	K(1)FAEISNAYEVLSDGDKR	3	-3.1205	4	0.506					1.039						1.279									1.176				1.044	1.046	0.9	0.997	0.878	0.961	0.781	0.841	0.993	1.2	1.17	1.176	0.913	0.876
Capana00g003291	557	K	PP178_ARATH Pentatricopeptide repeat-containing protein At2g31400, chloroplastic OS=Arabidopsis thaliana GN=At2g31400 PE=2 SV=1	At2g31400	1	7.31069e-07	132.9	VEVK(1)NNYPVSSSGQGK	2	2.7265	23	1.4	1.384	1.455	1.434	1.687	1.218	0.382		0.424				1.22		1.223	0.529		0.669	0.421					0.554	1.048	0.998	0.996	1.097	1.109	1.089	0.913	0.852	0.907	0.942	0.926	0.912	1.05	1.043
Capana00g003295	131	K	GLNB_ARATH Nitrogen regulatory protein P-II homolog OS=Arabidopsis thaliana GN=GLB1 PE=1 SV=1	GLB1	1	0.0128239	45.183	QAGSEFSEDNFVAK(1)VK	2	-4.4931	1																							1		0.764	0.749	0.82	0.855	0.895	0.943	1.001	1.027	0.981	1.268	1.36	1.413	0.684	0.822
Capana00g003295	75	K	GLNB_ARATH Nitrogen regulatory protein P-II homolog OS=Arabidopsis thaliana GN=GLB1 PE=1 SV=1	GLB1	1	0.000310802	90.263	FYK(1)VEAILRPWR	3	-10.23	10	1.119	1.015		1.517	1.065	1.387		1.132	1.243			0.147			0.581								0.794		0.764	0.749	0.82	0.855	0.895	0.943	1.001	1.027	0.981	1.268	1.36	1.413	0.684	0.822
Capana00g003324	25	K	WHI3_YEAST Protein WHI3 OS=Saccharomyces cerevisiae (strain ATCC 204508 / S288c) GN=WHI3 PE=1 SV=1	WHI3	1	0.00107002	65.173	QPQQQQQQLPQSAGLLK(1)R	2	-5.4615	2										0.783												1.217			0.98	0.92	0.897	0.863	0.823	0.836	0.668	0.672	0.671	1.178	1.2	1.239	0.884	0.911
Capana00g003367	87	K	THF1_SOLTU Protein THYLAKOID FORMATION1, chloroplastic OS=Solanum tuberosum GN=THF1 PE=2 SV=1	THF1	1	0.000806928	105.81	LCAALNVNK(1)K	2	-7.1223	4									0.576										0.941				1.325	1.158	0.762	0.811	0.904	0.965	0.971	1.13	1.154	1.094	1.134	0.978	1.047	0.86	1.131	1.073
Capana00g003379	182	K	NDK4_ARATH Nucleoside diphosphate kinase IV, chloroplastic/mitochondrial OS=Arabidopsis thaliana GN=NDK4 PE=1 SV=2	NDK4	1	1.20573e-231	285.55	LIGATDPQK(1)SEPGTIR	2	-1.8309	47	0.808	0.816	0.834	0.742	0.776	0.782	0.972	0.918	0.976	0.95	0.915	1.035	1.041	1.025	0.994	1.076	1.046	1.032	0.978	0.948	1.008	1.357	1.524	1.446	0.984	0.876	0.815	0.846	0.814	0.811	0.796	0.813	0.863	0.965	0.987	0.971	0.926	0.937
Capana00g003379	134	K	NDK4_ARATH Nucleoside diphosphate kinase IV, chloroplastic/mitochondrial OS=Arabidopsis thaliana GN=NDK4 PE=1 SV=2	NDK4	1	2.40704e-145	256.71	EFAQK(1)HYHDLSER	2	1.2479	83	1.054	0.902	1.054	1.486	0.921	1.179	0.919	0.953	1.138	1.033	0.663	0.866	1.254	1.063	0.874	1.507	1.472	1.277	1.137	0.849	0.659	0.597	0.619	0.525	0.984	0.876	0.815	0.846	0.814	0.811	0.796	0.813	0.863	0.965	0.987	0.971	0.926	0.937
Capana00g003382	163	K	NAD(P)H-quinone oxidoreductase subunit S, chloroplastic	---	1	0.00782544	51.569	TESSMVSGFNQSLVK(1)K	2	2.1953	1																						1			0.961	0.974	0.901	0.912	0.885	0.873	1.191	1.165	1.121	1.101	1.06	1.019	0.911	0.935
Capana00g003382	75	K	NAD(P)H-quinone oxidoreductase subunit S, chloroplastic	---	1	0.00034099	78.864	GLCNGEEGIEK(1)ELK	2	-2.4839	7	0.964	1.102	0.883	0.989	1.188	1.119				0.755															0.961	0.974	0.901	0.912	0.885	0.873	1.191	1.165	1.121	1.101	1.06	1.019	0.911	0.935
Capana00g003394	109	K	LACS4_ARATH Long chain acyl-CoA synthetase 4 OS=Arabidopsis thaliana GN=LACS4 PE=2 SV=1	LACS4	1	4.35354e-09	166.65	K(1)HFEASPLSDK	2	-6.8966	17	1.132	1.5						1.03	1.072	0.955	0.957	0.857	1.396	1.153	1.513	0.959		0.974	0.858	0.925		0.602	0.655	0.461
Capana00g003412	64	K	hypothetical protein	---	1	0.000201755	76.255	VVCDK(1)TSTPTSQK	2	-7.1613	4				0.94		0.815							1.107		1.138
Capana00g003486	272	K	URT1_FRAAN Putative UDP-rhamnose:rhamnosyltransferase 1 OS=Fragaria ananassa GN=GT4 PE=2 SV=1	GT4	1	0.00041411	84.368	TLACQPNWK(1)K	2	-8.1879	3						1.215	1.121					0.663													1.521	1.587	1.619	1.561	1.559	1.542	1.481	1.461	1.497	1.056	1.042	1.049	0.62	0.638
Capana00g003486	276	K	URT1_FRAAN Putative UDP-rhamnose:rhamnosyltransferase 1 OS=Fragaria ananassa GN=GT4 PE=2 SV=1	GT4	0.957851	0.000236924	110.52	K(0.042)ISK(0.958)WLDEQKPR	3	-6.6714	8				1.72	1.706		1.177	1.145		0.674		0.75			0.542				0.286						1.521	1.587	1.619	1.561	1.559	1.542	1.481	1.461	1.497	1.056	1.042	1.049	0.62	0.638
Capana00g003486	273	K	URT1_FRAAN Putative UDP-rhamnose:rhamnosyltransferase 1 OS=Fragaria ananassa GN=GT4 PE=2 SV=1	GT4	0.951724	6.84121e-07	127.93	K(0.952)ISK(0.048)WLDEQKPR	3	-5.7615	7	1.062	0.949		1.235	1.225	1.232			0.758			0.539													1.521	1.587	1.619	1.561	1.559	1.542	1.481	1.461	1.497	1.056	1.042	1.049	0.62	0.638
Capana00g003486	355	K	URT1_FRAAN Putative UDP-rhamnose:rhamnosyltransferase 1 OS=Fragaria ananassa GN=GT4 PE=2 SV=1	GT4	1	2.00091e-22	187.51	GLVHIGWAPQK(1)EILAHR	3	-8.9794	22	1.499	1.547	1.515		1.458	1.493	1.593	1.504	1.604	0.785	0.97	1.034	0.605	0.66	0.674		0.634	0.671	0.741	0.745	0.7	0.506	0.559	0.504	1.521	1.587	1.619	1.561	1.559	1.542	1.481	1.461	1.497	1.056	1.042	1.049	0.62	0.638
Capana00g003500	42	K	ADK2_ARATH Adenosine kinase 2 OS=Arabidopsis thaliana GN=ADK2 PE=1 SV=1	ADK2	0.997423	6.56961e-07	78.359	YDIK(0.003)PNNAILAEDK(0.997)HLPMYEEMTSK	3	1.7539	5		1.588								0.899		0.924				0.729					0.86				0.968	0.965	0.9	1.081	1.039	1.014	0.972	0.996	0.886	0.895	0.887	0.876	1.106	1.086
Capana00g003501	33	K	TSN_PONAB Translin OS=Pongo abelii GN=TSN PE=2 SV=1	TSN	1	0.00226302	76.572	LEESGNLK(1)ER	2	-3.7328	7		0.812								0.968	0.881				0.834							1.195	1.223	1.087	0.978	0.906	0.947	1.05	0.991	1.033	0.862	0.856	0.88	0.914	0.948	0.958	0.977	0.955
Capana00g003501	207	K	TSN_PONAB Translin OS=Pongo abelii GN=TSN PE=2 SV=1	TSN	1	0.00410421	108.93	FDGMK(1)YDLR	2	-5.8322	9			0.999			1.002		0.838				0.886	0.963						0.909			1.404			0.978	0.906	0.947	1.05	0.991	1.033	0.862	0.856	0.88	0.914	0.948	0.958	0.977	0.955
Capana00g003506	351	K	OPR1_SOLLC 12-oxophytodienoate reductase 1 OS=Solanum lycopersicum GN=OPR1 PE=1 SV=1	OPR1	1	0.00380293	63.397	FELNAPLNK(1)YNR	2	-1.3926	1																								1													0.903	0.947
Capana00g003506	12	K	OPR1_SOLLC 12-oxophytodienoate reductase 1 OS=Solanum lycopersicum GN=OPR1 PE=1 SV=1	OPR1	1	0.00142073	93.772	TAEEK(1)HIPLMTPYK	2	-3.9916	5													0.841	1.006		0.901							1.23	1.021													0.903	0.947
Capana00g003516	46	K	NH2L1_XENLA NHP2-like protein 1 OS=Xenopus laevis GN=nhp2l1 PE=2 SV=1	nhp2l1	1	0.000504794	74.849	GANEATK(1)TLNR	2	-7.3971	5		0.698									0.758	0.849										1.378	1.318		0.998	0.99	0.907	1.02	0.991	1.004	0.677	0.707	0.694	1.321	1.21	1.247	0.811	0.784
Capana00g003527	120	K	SR542_SOLLC Signal recognition particle 54 kDa protein 2 OS=Solanum lycopersicum PE=2 SV=1	---	1	0.0021484	79.311	TTTCTK(1)YAYYHQK	2	0.76485	8			0.936	1.342	1.102	0.8							0.82												1.074	1.255	1.146	1.234	1.065	1.116	0.981	0.912	0.872	0.773	0.675	0.645	1.317	1.088
Capana00g003536	53	K	14339_SOLLC 14-3-3 protein 9 OS=Solanum lycopersicum GN=TFT9 PE=2 SV=2	TFT9	1	1.88859e-12	150.44	NLLSVGYK(1)NVVGSR	2	3.4006	24	0.689	0.903	0.794	0.975	0.934	1.082	1.04	1.4	1.716	1.279	0.93	1.088	1.363	0.78	0.777	1.208	1.331	1.37	1.317	0.869	0.879	0.443	0.378	0.452	1.135	1.084	1.136	0.837	0.929	0.981	1.037	1.111	1.125	1.096	1.147	1.14	0.865	0.901
Capana00g003542	246	K	ILV5_ARATH Ketol-acid reductoisomerase, chloroplastic OS=Arabidopsis thaliana GN=At3g58610 PE=2 SV=2	At3g58610	1	6.41831e-53	160.07	NISVIAVCPK(1)GMGPSVR	2	-5.0471	30	1.021	0.95	0.945	1.689	1.743	1.952	0.623	0.891	0.932	0.771	0.546	0.885	1.466	1.091	0.756	0.868	0.768	0.676					0.427		1.07	1.043	1.087	1.087	1.111	1.143	0.984	0.946	0.982	1.128	1.107	1.104	1.072	1.017
Capana00g003542	88	K	ILV5_ARATH Ketol-acid reductoisomerase, chloroplastic OS=Arabidopsis thaliana GN=At3g58610 PE=2 SV=2	At3g58610	1	7.242e-09	119.55	APASFDFETSVFK(1)K	2	-2.9424	4				0.658				1.204	1.27														0.868		1.07	1.043	1.087	1.087	1.111	1.143	0.984	0.946	0.982	1.128	1.107	1.104	1.072	1.017
Capana00g003542	357	K	ILV5_ARATH Ketol-acid reductoisomerase, chloroplastic OS=Arabidopsis thaliana GN=At3g58610 PE=2 SV=2	At3g58610	1	0.00157404	54.584	GMLAVYNSFTEEGK(1)R	2	2.3565	5											1.025			0.979	0.996										1.07	1.043	1.087	1.087	1.111	1.143	0.984	0.946	0.982	1.128	1.107	1.104	1.072	1.017
Capana00g003547	100	K	NECP1_HUMAN Adaptin ear-binding coat-associated protein 1 OS=Homo sapiens GN=NECAP1 PE=1 SV=2	NECAP1	1	2.26727e-07	124.69	ERPEAYDFQAALHDHQK(1)YLNK	4	-8.5616	24	1.056	1.104	1.06	0.964	0.965	0.919	1.147	1.147	1.255	0.865	0.836	0.807	1.056	1.101	1.016	0.976	0.938	0.8	1.238	1.023	1.178	0.811	0.939	0.799	0.89	0.846	0.878	0.978	0.915	1.019	0.801	0.954	0.881	1.09	1.109	0.978	0.983	0.952
Capana00g003557	218	K	BUP1_DICDI Beta-ureidopropionase OS=Dictyostelium discoideum GN=pyd3 PE=1 SV=1	pyd3	1	2.28169e-07	51.128	DLNHGETLWNTAVIIGNHGNIIGK(1)HR	4	-2.721	2				1																					0.986	0.96	0.885	1.007	0.931	0.989	0.952	0.833	0.903	0.889	0.921	0.865	0.982	1.076
Capana00g003563	659	K	NUA_ARATH Nuclear-pore anchor OS=Arabidopsis thaliana GN=NUA PE=1 SV=1	NUA	1	0.000226006	117.3	VK(1)SLEEESSR	2	-4.5734	10	0.603		0.511				1.397	1.342	1.334				0.929		0.805		1.138				1.566		0.374		1.167	0.859	0.851	0.624	0.62	0.682	1.322	1.435	1.512	0.825	0.739	0.832	0.654	0.67
Capana00g003566	137	K	TAS_SHIFL Protein tas OS=Shigella flexneri GN=tas PE=3 SV=1	tas	1	5.94421e-54	200.06	VILATK(1)VCGYSER	2	-5.7817	24	1.194	1.259	1.248	1.576	1.536	2.103	1	1.004	0.955	0.792		1.318	1.102		1.119	0.781	0.862	0.768	0.524	0.486	0.484		0.441	0.448	0.731	0.992	1.075	0.943	0.968	1.027	1.241	1.294	1.241	1.229	1.189	1.139	1.008	1.032
Capana00g003566	56	K	TAS_SHIFL Protein tas OS=Shigella flexneri GN=tas PE=3 SV=1	tas	1	0.00749216	53.878	LAQK(1)NAMQYR	2	-9.8239	1						1																			0.731	0.992	1.075	0.943	0.968	1.027	1.241	1.294	1.241	1.229	1.189	1.139	1.008	1.032
Capana00g003569	190	K	Y575_SYNY3 Thylakoid membrane protein slr0575 OS=Synechocystis sp. (strain PCC 6803 / Kazusa) GN=slr0575 PE=4 SV=1	slr0575	1	7.98312e-45	154.94	YGDEQHLDEALK(1)R	2	-9.0405	17	0.939	0.971	0.997	0.879	1.028	0.893		0.809	0.811		0.997	0.671				0.98	0.914		0.901	0.936		1.51	1.419	1.345	1.062	0.995	0.954	1.052	1.066	1.019	1.01	1.036	1.054	0.765	0.733	0.749	1.142	1.151
Capana00g003569	244	K	Y575_SYNY3 Thylakoid membrane protein slr0575 OS=Synechocystis sp. (strain PCC 6803 / Kazusa) GN=slr0575 PE=4 SV=1	slr0575	1	6.29001e-07	108.3	QAK(1)FTSFFGPR	2	-19.181	16						0.466		0.565	0.644	0.862			1.311			4.04		1.351	0.841	0.429	0.742	0.281	0.816	0.652	1.062	0.995	0.954	1.052	1.066	1.019	1.01	1.036	1.054	0.765	0.733	0.749	1.142	1.151
Capana00g003656	87	K	RL30_LUPLU 60S ribosomal protein L30 OS=Lupinus luteus GN=RPL30 PE=3 SV=1	RPL30	1	5.8697e-51	185.57	VGVHHYNGNNVDLGTACGK(1)YYR	3	-6.2832	24	1.587		0.971	1.429		1.474		0.579		0.85	0.788	0.858	1.373	1.117	1.046			0.89	0.5	0.537					1.071	1.096	1.04	1.227	1.214	1.167	0.875	0.761	0.8	0.9	0.862	0.851	1.063	1.683
Capana00g003675	278	K	K0664_DROWI Protein KIAA0664 homolog OS=Drosophila willistoni GN=GK22132 PE=3 SV=1	GK22132	1	2.24852e-97	204.34	GFTEHNK(1)FGNLPYGFR	2	5.5703	43	1.169	1.502	1.283	1.318	1.272	1.216	1.07	0.9	0.913	0.649	0.708	0.742	0.885	0.93	1.031	0.968	0.916	0.816		0.866	0.848				1.166	1.203	1.184	1.053	1.091	1.119	1.167	1.181	1.146	0.818	0.83	0.854	1.156	1.14
Capana00g003675	227	K	K0664_DROWI Protein KIAA0664 homolog OS=Drosophila willistoni GN=GK22132 PE=3 SV=1	GK22132	1	0.00535445	62.705	ICSGK(1)PTTIVASR	2	-6.649	1									1																1.166	1.203	1.184	1.053	1.091	1.119	1.167	1.181	1.146	0.818	0.83	0.854	1.156	1.14
Capana00g003675	837	K	K0664_DROWI Protein KIAA0664 homolog OS=Drosophila willistoni GN=GK22132 PE=3 SV=1	GK22132	1	8.59842e-07	106	LQHTELALK(1)YVNR	2	4.4846	14	1.28			0.974	1.091	1.08	0.943		1.008				0.901	0.848		0.889	0.908	1.045	1.07	1.029	0.934				1.166	1.203	1.184	1.053	1.091	1.119	1.167	1.181	1.146	0.818	0.83	0.854	1.156	1.14
Capana00g003691	145	K	Tetraspanin-8	---	1	2.41769e-05	124.46	ICQK(1)LIDQGSNTK	2	-8.8419	3																						0.636	1.36	1.004
Capana00g003720	76	K	N-acetyltransferase domain-containing protein	---	1	5.46919e-126	197.85	TFYGFHNETVNTQDHTK(1)YLTER	3	-3.4136	24	1.186	1.23	1.175	0.991	1.074		1.227	1.259	1.222	1.016	0.983	0.928	0.859	0.889	0.849	0.829	0.837	0.76	0.886	0.935	0.901	1.011	0.979	0.973
Capana00g003764	103	K	ANM13_ARATH Probable histone-arginine methyltransferase 1.3 OS=Arabidopsis thaliana GN=PRMT13 PE=2 SV=3	PRMT13	1	0.00106552	78.043	GISIQFK(1)NDEDSR	2	-0.09891	5			1.144			1.473		1.049											0.656		0.678				1.366	1.115	0.854	1.411	0.948	0.956	0.731	0.471	0.464	0.666	0.65	0.587	1.055	1.318
Capana00g003768	18	K	proteoglycan 4-like	---	1	6.89526e-05	83.214	VDLQCSSCYK(1)EVPR	2	-3.6518	12	1.345	1.324		0.922			1.012	1.049	1.07	1.028	0.952	1.264	0.797		0.576		0.663								1.092	1.094	0.98	0.99	1.084	0.999	0.969	1.459	1.007	0.891	1.331	1.466	1.16	1.117
Capana00g003770	137	K	TAD2B_ARATH Transcriptional adapter ADA2b OS=Arabidopsis thaliana GN=ADA2B PE=1 SV=1	ADA2B	0.97499	6.45576e-10	145.73	LSAVSNAGITGIK(0.025)K(0.975)PSSK(1)SQIK	3	-5.1651	1			1
Capana00g003770	161	K	TAD2B_ARATH Transcriptional adapter ADA2b OS=Arabidopsis thaliana GN=ADA2B PE=1 SV=1	ADA2B	1	3.20909e-05	115.41	NFGGK(1)K(1)PK(1)SLK	2	-7.3934	19	0.953	2.045		0.674		0.959				0.698	0.892		0.947	0.65	0.994	0.926	0.935		0.611		0.649	1.631	0.705	1.731
Capana00g003770	136	K	TAD2B_ARATH Transcriptional adapter ADA2b OS=Arabidopsis thaliana GN=ADA2B PE=1 SV=1	ADA2B	1	1.01803e-50	197.71	LSAVSNAGITGIK(1)K	2	-7.3318	37	1.11	1.298	0.176	0.947	0.764	0.751	0.475	0.392	0.527	1.628	1.309	1.334	1.233	1.419	1.01	0.942	0.651	0.915	0.825	0.772	0.847	1.578	1.527	1.57
Capana00g003770	162	K	TAD2B_ARATH Transcriptional adapter ADA2b OS=Arabidopsis thaliana GN=ADA2B PE=1 SV=1	ADA2B	1	0.00273308	96.946	NFGGK(1)K(1)PK(1)SLK	2	-7.3934	9		1.111				0.984					0.916		0.972		1.021	0.95	0.96					1.015		1.071
Capana00g003770	141	K	TAD2B_ARATH Transcriptional adapter ADA2b OS=Arabidopsis thaliana GN=ADA2B PE=1 SV=1	ADA2B	1	1.01803e-50	197.71	PSSK(1)SQIK	2	-2.0535	40	1.424	1.381	1.381	0.976	0.658	0.948	0.282	0.338	0.367	1.38	0.949	1.149	1.061	1.314	1.215	0.862	0.928	0.941	0.71	0.98	0.879	1.354	1.269	1.255
Capana00g003770	164	K	TAD2B_ARATH Transcriptional adapter ADA2b OS=Arabidopsis thaliana GN=ADA2B PE=1 SV=1	ADA2B	1	4.75643e-31	165.72	PK(1)SLK(1)EDGSSLMK	2	-9.1954	42	0.582	2.177	0.595	0.45	0.458	1.854	0.286	0.246		0.361	1.689	0.406	1.83	0.435	1.991	1.832	1.864	0.433	0.347		0.452	1.827	0.322	1.562
Capana00g003770	167	K	TAD2B_ARATH Transcriptional adapter ADA2b OS=Arabidopsis thaliana GN=ADA2B PE=1 SV=1	ADA2B	1	4.75643e-31	165.72	PK(1)SLK(1)EDGSSLMK	2	-9.1954	23	1.378	1.316	1.409	1.064	1.084	0.989	0.678	0.583		0.856	0.836	0.962	0.975	1.029	1.19	1.055	1.098	1.026	0.821		1.07	0.819	0.763
Capana00g003783	61	K	RL6_MESCR 60S ribosomal protein L6 OS=Mesembryanthemum crystallinum GN=RPL6 PE=2 SV=1	RPL6	0.954778	1.57692e-13	84.86	K(0.003)PSAAVAVNAAVVK(0.955)PPK(0.042)FYPSDDVAKPLINK	4	-1.1006	9				0.982			1.107	1.153	1.067				0.879						0.91	0.901					1.252	1.204	1.107	1.053	1.029	1.13	0.999	0.903	0.902	1.086	1.063	0.946	1.052	1.112
Capana00g003783	19	K	RL6_MESCR 60S ribosomal protein L6 OS=Mesembryanthemum crystallinum GN=RPL6 PE=2 SV=1	RPL6	1	0.00021418	88.24	NPNLINGIGK(1)FSR	2	0.55065	25	1.058	1.366	0.355	1.422	1.294	0.491	1.306	1.54	0.583		0.863	0.972	1.382	1.212	1.146					0.372	1.501		0.6	0.538	1.252	1.204	1.107	1.053	1.029	1.13	0.999	0.903	0.902	1.086	1.063	0.946	1.052	1.112
Capana00g003783	78	K	RL6_MESCR 60S ribosomal protein L6 OS=Mesembryanthemum crystallinum GN=RPL6 PE=2 SV=1	RPL6	0.999087	0.00509331	90.142	PLINK(0.999)HK(0.001)PKPTK	3	-2.1829	3	1.112				0.939	0.949																			1.252	1.204	1.107	1.053	1.029	1.13	0.999	0.903	0.902	1.086	1.063	0.946	1.052	1.112
Capana00g003783	48	K	RL6_MESCR 60S ribosomal protein L6 OS=Mesembryanthemum crystallinum GN=RPL6 PE=2 SV=1	RPL6	0.996056	0.00190909	60.055	K(0.996)PSAAVAVNAAVVK(0.003)PPK(0.001)FYPSDDVAK	3	0.68859	5			1.498									0.737						0.765							1.252	1.204	1.107	1.053	1.029	1.13	0.999	0.903	0.902	1.086	1.063	0.946	1.052	1.112
Capana00g003785	317	K	UGPA_SOLTU UTP--glucose-1-phosphate uridylyltransferase OS=Solanum tuberosum PE=1 SV=3	---	1	1.89008e-11	115.29	VQLLEIAQVPDQHVNEFK(1)SIEK	3	-6.8971	1								1																	1.37	1.255	1.187	1.328	1.291	1.228	0.941	0.999	0.986	1.067	0.91	0.995	0.753	0.867
Capana00g003818	26	K	TCPQ_DICDI T-complex protein 1 subunit theta OS=Dictyostelium discoideum GN=cct8 PE=3 SV=1	cct8	1	1.72867e-30	105.79	HLSGLDEAVLK(1)NIDACK	2	1.8211	10	2.017						0.887	0.818		0.818	0.923	0.907	1.385				0.741	0.764			0.741				1.112	1.094	1.111	1.07	1.117	1.117	0.976	0.96	0.991	0.98	1.005	1	1.041	1.062
Capana00g003850	120	K	FK202_ARATH Peptidyl-prolyl cis-trans isomerase FKBP20-2, chloroplastic OS=Arabidopsis thaliana GN=FKBP20-2 PE=1 SV=1	FKBP20-2	1	0.00563509	79.059	VVTSDNYVK(1)R	2	4.6839	10							0.988					1.323							1.03			1.068	0.918	0.673	1.054	1.026	1.066	1.039	1.046	1.07	1.278	1.076	1.203	1.274	1.285	1.195	0.802	0.748
Capana00g003863	1008	K	GLUT1_ARATH Glutamate synthase 1 [NADH], chloroplastic OS=Arabidopsis thaliana GN=GLT1 PE=1 SV=2	GLT1	1	2.40947e-05	97.594	VPLEEVEPASEIVK(1)R	2	-3.103	5	1.041	1.128	1.241	0.801		0.789																			1.693	1.496	1.432	1.022	0.984	0.821	1.138	0.851	1.033	1.199	1.235	1.128	0.733	0.757
Capana00g003951	147	K	histone deacetylase HDT2	---	1	0.00331029	56.938	NVSGQK(1)NSK(1)GK(1)QGRK	2	-3.8783	5	1.162			0.995					0.522				1.208				1.113
Capana00g003951	145	K	histone deacetylase HDT2	---	1	0.00331029	56.938	NVSGQK(1)NSK(1)GK(1)QGRK	2	-3.8783	5	1.162			0.995					0.522				1.208				1.113
Capana00g003951	142	K	histone deacetylase HDT2	---	1	0.00331029	56.938	NVSGQK(1)NSK(1)GK(1)QGRK	2	-3.8783	5	1.162			0.995					0.522				1.208				1.113
Capana00g003958	177	K	EKIA_DICDI Probable ethanolamine kinase A OS=Dictyostelium discoideum GN=etnkA PE=3 SV=1	etnkA	0.999999	0.00663492	65.173	FFK(1)NASTLQFDDGEKK	3	-1.0849	9	1.109	1.101		1.097	1.13	1.147	0.863	0.852	0.942	0.76																				0.931
Capana00g003977	125	K	RR13_ARATH 30S ribosomal protein S13, chloroplastic OS=Arabidopsis thaliana GN=RPS13 PE=2 SV=1	RPS13	1	0.00119342	72.492	LK(1)EIQCYR	2	-7.4151	3							1.128										0.797	1.076							1.173	1.238	1.191	1.331	1.269	1.358	0.917	0.871	0.912	1.068	1	0.96	1.102	1.151
Capana00g004057	567	K	WRK20_ARATH Probable WRKY transcription factor 20 OS=Arabidopsis thaliana GN=WRKY20 PE=2 SV=1	WRKY20	1	0.0177211	50.116	IESGGNK(1)HVEESK	2	-7.2301	1																								1
Capana00g004062	81	K	OLA1_CHICK Obg-like ATPase 1 OS=Gallus gallus GN=OLA1 PE=2 SV=1	OLA1	1	0.000125725	70.389	FEWLCQLYK(1)PK	2	-3.506	6	1.483	0.545					1.051			1.24	1.003		0.677												1.082	1.026	1.059	1.073	1.062	1.034	1.089	1.063	1.082	1.023	1.022	0.984	1.014	0.999
Capana00g004062	182	K	OLA1_CHICK Obg-like ATPase 1 OS=Gallus gallus GN=OLA1 PE=2 SV=1	OLA1	1	1.0595e-07	107.08	QLK(1)IEHELCLR	2	-6.0137	12		1.262	1.251	1.511	1.665	1.36		0.765	0.682					0.897		0.62		0.813	0.492		0.681				1.082	1.026	1.059	1.073	1.062	1.034	1.089	1.063	1.082	1.023	1.022	0.984	1.014	0.999
Capana00g004062	286	K	OLA1_CHICK Obg-like ATPase 1 OS=Gallus gallus GN=OLA1 PE=2 SV=1	OLA1	1	3.53852e-09	110.44	YCEENK(1)LQSCLPK	2	-4.3498	15	1.387	0.129	1.385	0.845	1.26	1.5			0.304	0.756		0.919		1.338	1.303	0.863			0.773	1.144	1.094				1.082	1.026	1.059	1.073	1.062	1.034	1.089	1.063	1.082	1.023	1.022	0.984	1.014	0.999
Capana00g004102	86	K	DHR12_BOVIN Dehydrogenase/reductase SDR family member 12 OS=Bos taurus GN=DHRS12 PE=2 SV=1	DHRS12	1	4.01246e-05	102.03	GEAALTK(1)IHSITGNK	2	-7.5229	4				1.009	0.96																	1.124		0.907	0.947	0.911	0.949	0.996	0.912	0.992	0.88	1.004	0.965	0.761	0.863	0.798	1.026	1.017
Capana00g004151	252	K	THI41_VITVI Thiamine thiazole synthase 1, chloroplastic OS=Vitis vinifera GN=THI1-1 PE=3 SV=1	THI1-1	1	2.2897e-121	176	VVVSSCGHDGPMGATGVK(1)R	2	-3.1116	53	1.134	0.918	0.88	1.406	1.212	1.332	1.297	1.331	1.208	0.894	0.601	0.813	0.773	0.635	0.629	0.907	0.656	0.675	0.859	0.833	1.132	1.244	1.287	1.342	1.082	1.15	1.158	1.041	1.072	1.039	1.254	1.258	1.314	1.039	1.057	1.056	0.636	0.64
Capana00g004152	409	K	PME22_SOLLC Pectinesterase 2.2 OS=Solanum lycopersicum GN=PME2.2 PE=3 SV=1	PME2.2	1	1.18962e-07	146.88	NQK(1)NMVTAQGR	2	-7.1926	15	1.047		1.049	0.943	1.201			0.817	0.885	0.868		0.969	1.298	1.344			0.968		0.867	0.878	0.866				0.76	0.79	0.891	0.825	0.785	0.871	0.88	0.871	0.916	1.042	1.096	1.18	1.193	1.158
Capana00g004152	504	K	PME22_SOLLC Pectinesterase 2.2 OS=Solanum lycopersicum GN=PME2.2 PE=3 SV=1	PME2.2	1	2.38599e-33	171.14	TLYYGEYMNNGPGAGTSK(1)R	2	-0.64387	31	1.122	0.994	0.996	0.992		1.272	0.869	0.939	0.918		0.745	0.801	1.358	1.456	0.952	0.971	1.074		0.954	0.909	0.844	0.728	1.105		0.76	0.79	0.891	0.825	0.785	0.871	0.88	0.871	0.916	1.042	1.096	1.18	1.193	1.158
Capana00g004162	341	K	P2C55_ARATH Probable protein phosphatase 2C 55 OS=Arabidopsis thaliana GN=At4g16580 PE=2 SV=2	At4g16580	1	0.00865024	56.938	AMDHTK(1)SSPFSDGAR	2	-4.1123	2														1.091									0.909		1.087	0.922	0.981	0.876	1.011	1.007	1.002	1.012	1.008	0.958	1.038	0.979	0.886	0.884
Capana00g004285	294	K	IF4A3_NICPL Eukaryotic initiation factor 4A-3 OS=Nicotiana plumbaginifolia PE=2 SV=1	---	0.999999	0.0123646	84.309	KGVAINFVK(1)SDDIK	2	3.7459	5						1.264						0.879		1.126			0.856	0.875							1.008	1.088	1.075	1.18	1.19	1.174	0.918	0.919	0.902	1.048	1.025	1.053	1	1.008
Capana00g004292	276	K	HIS8_TOBAC Histidinol-phosphate aminotransferase, chloroplastic OS=Nicotiana tabacum GN=HPA PE=2 SV=1	HPA	1	0.00348543	126.82	K(1)HENLIVLR	2	-7.9277	19	0.831	0.792	0.865	0.804	0.83		0.785			0.835	0.897	0.809	1.203	1.332	1.282			1.091	0.977	1.079	1.046	1.105	1.232	1.204	0.846	0.914	0.973	0.942	0.866	0.881	0.883	0.812	1.017	0.794	0.708	0.811	1.371	1.197
Capana00g004313	198	K	FKB19_ARATH Peptidyl-prolyl cis-trans isomerase FKBP19, chloroplastic OS=Arabidopsis thaliana GN=FKBP19 PE=1 SV=1	FKBP19	1	0.0101793	41.317	LADDTEGTIEAAK(1)WLHK	3	-9.1337	1										1															0.915	0.88	0.888	0.944	0.925	0.913	0.862	0.853	0.847	1.086	1.145	1.103	0.929	0.931
Capana00g004313	500	K	FKB19_ARATH Peptidyl-prolyl cis-trans isomerase FKBP19, chloroplastic OS=Arabidopsis thaliana GN=FKBP19 PE=1 SV=1	FKBP19	1	0.0110121	58.338	MK(1)FPDYTETQSGLQYK	2	-1.489	1																							1		0.915	0.88	0.888	0.944	0.925	0.913	0.862	0.853	0.847	1.086	1.145	1.103	0.929	0.931
Capana00g004323	69	K	ATPBM_NICPL ATP synthase subunit beta, mitochondrial OS=Nicotiana plumbaginifolia GN=ATPB PE=1 SV=1	ATPB	1	0.000424719	122.2	PSTPPPK(1)SSGSEPSGK	2	-6.6789	19	1.128	1.098	1.087	1.07	1.003	1.04	0.85	0.701		0.819				1.139	1.218	0.844	0.916		0.827	0.902	0.977	1.122	1.116	1.142	0.969	0.866	0.868	0.886	0.899	0.816	0.959	1.041	1.027	1.199	1.142	1.221	0.939	0.84
Capana00g004374	131	K	ARNA_SERP5 Bifunctional polymyxin resistance protein ArnA OS=Serratia proteamaculans (strain 568) GN=arnA PE=3 SV=1	arnA	1	0.000618138	113.1	YCSENGK(1)R	2	5.6675	61	1.243	1.171	1.276	0.141	1.47	1.369	0.455	0.486	0.45	0.652	0.711	0.782	1.175	1.157	1.154	0.744	0.613	0.721	0.482	0.542	0.761	1.168	2.666	2.61	1.041	0.985	0.986	1.072	1.09	1.053	0.492	0.49	0.478	0.715	0.71	0.712	0.837	0.831
Capana00g004374	339	K	ARNA_SERP5 Bifunctional polymyxin resistance protein ArnA OS=Serratia proteamaculans (strain 568) GN=arnA PE=3 SV=1	arnA	1	0.000167742	99.174	EFYGEGYDDSDK(1)R	2	-8.0102	4	0.688					0.844													0.853			1.614			1.041	0.985	0.986	1.072	1.09	1.053	0.492	0.49	0.478	0.715	0.71	0.712	0.837	0.831
Capana00g004374	250	K	ARNA_SERP5 Bifunctional polymyxin resistance protein ArnA OS=Serratia proteamaculans (strain 568) GN=arnA PE=3 SV=1	arnA	1	0.000297173	101.48	REPLK(1)LVDGGHSQR	3	-4.8431	9		0.966	0.822	0.963													0.523					1.43	1.145	1.151	1.041	0.985	0.986	1.072	1.09	1.053	0.492	0.49	0.478	0.715	0.71	0.712	0.837	0.831
Capana00g004374	55	K	ARNA_SERP5 Bifunctional polymyxin resistance protein ArnA OS=Serratia proteamaculans (strain 568) GN=arnA PE=3 SV=1	arnA	1	2.22258e-17	142.08	IK(1)HLLEPSELPWNGR	2	-2.6989	40	0.79	0.701	0.92	1.029	1.152	1.097	0.484	0.463	0.493	0.635	0.669	0.61	1.21	0.914	1.083	0.902	0.923	1.043	0.868	0.887	0.758	2.064	2.259	2.047	1.041	0.985	0.986	1.072	1.09	1.053	0.492	0.49	0.478	0.715	0.71	0.712	0.837	0.831
Capana00g004429	80	K	ODO2B_ARATH Dihydrolipoyllysine-residue succinyltransferase component of 2-oxoglutarate dehydrogenase complex 2, mitochondrial OS=Arabidopsis thaliana GN=At4g26910 PE=1 SV=2	At4g26910	1	1.82702e-159	193.42	VAIISK(1)SSECVESVDHVAPSEKPSEK	4	-6.6207	39	1.697	1.604	1.446	1.302	1.251	1.238	1.005	0.982	0.968	0.778	0.723	0.811	0.858	0.996	0.947	1.716	0.624	0.662	0.718	0.846	0.649	0.18			0.955	0.967	1.051		0.812	0.804		0.966	1.139	1.029	0.924		0.915	1.045
Capana00g004429	202	K	ODO2B_ARATH Dihydrolipoyllysine-residue succinyltransferase component of 2-oxoglutarate dehydrogenase complex 2, mitochondrial OS=Arabidopsis thaliana GN=At4g26910 PE=1 SV=2	At4g26910	1	0.00769605	74.424	DAFVEK(1)HGVK	2	-6.0957	8		0.942		0.915					1.098	0.954				1.088								0.864	1.04	1.099	0.955	0.967	1.051		0.812	0.804		0.966	1.139	1.029	0.924		0.915	1.045
Capana00g004435	46	K	FBK67_ARATH F-box/kelch-repeat protein At3g23880 OS=Arabidopsis thaliana GN=At3g23880 PE=2 SV=1	At3g23880	1	0.000295085	78.932	SPSFIEK(1)HFHHK	3	-6.8521	8	1.281	1.248	1.291	1.202			0.923			0.663	0.734								0.658						0.842	0.966	0.971	1.138	0.83	0.921	1.081	1.275	1.283	0.976	1.031	1.203	0.911	1.05
Capana00g004496	161	K	PSA4_PETHY Proteasome subunit alpha type-4 OS=Petunia hybrida GN=PAC1 PE=2 SV=1	PAC1	1	1.14534e-07	132.9	VLSK(1)TMDSTSLTSEK	2	-3.9623	22	1.327		0.897	1.196	0.942	1.011	0.764	0.849	0.806	1.004	1.262	1.823	0.902	1.005	0.865	0.708	0.74	0.829	0.87	0.845		1.354
Capana00g004500	10	K	protein DR_1172-like	---	1	0.0049947	51.454	ASGSAANAK(1)DTVK(1)DK	2	-8.5244	2						1.626	0.374
Capana00g004500	14	K	protein DR_1172-like	---	1	0.0049947	51.454	ASGSAANAK(1)DTVK(1)DK	2	-8.5244	2						1.626	0.374
Capana00g004516	324	K	ADT2_SOLTU ADP,ATP carrier protein, mitochondrial (Fragment) OS=Solanum tuberosum GN=ANT1 PE=2 SV=1	ANT1	1	7.23629e-41	159.44	SSFDAFSQILK(1)NEGAK	2	7.3439	18	1.31		1.131	1.024	1.124	1.293	0.924	1.238	1.086	0.525	0.613	0.784	0.83	1.045	1.111	1.267		1.046	0.85	0.802					0.839	0.907	0.911	0.983	0.923	1.008	0.925	1	0.893	0.836	0.88	0.847	1.101	1.062
Capana00g004559	417	K	PRP6_MOUSE Pre-mRNA-processing factor 6 OS=Mus musculus GN=Prpf6 PE=2 SV=1	Prpf6	1	0.00430507	53.051	GCEECPK(1)NEDVWLEACR	2	5.1516	3		1.273				1.038			0.69																1.118	1.115	1.056	1.053	1.023	0.928	0.945	0.902	1.013	0.86		1.098	0.659	0.875
Capana00g004560	333	K	POR_DAUCA Protochlorophyllide reductase, chloroplastic OS=Daucus carota GN=POR1 PE=2 SV=1	POR1	1	6.57699e-124	236.7	YITK(1)GYVSEEESGKR	2	-2.7767	57	1.189	1.222	1.221	1.173	1.137	1.193	0.812	0.799	0.778	0.901	0.933	0.954	1.154	1.281	1.233	0.725	0.694	0.683	0.777	0.807	0.82	1.167	1.183	1.163	1.17	1.155	1.056	1.099	1.1	1.096	0.913	0.944	0.972	0.892	0.873	0.871	1.157	1.143
Capana00g004560	383	K	POR_DAUCA Protochlorophyllide reductase, chloroplastic OS=Daucus carota GN=POR1 PE=2 SV=1	POR1	1	0.00448657	74.486	EASDAEK(1)AR	2	-5.0319	11	0.824		0.813	0.922				0.865	0.852	0.905						0.718	0.657		0.851				1.819	1.774	1.17	1.155	1.056	1.099	1.1	1.096	0.913	0.944	0.972	0.892	0.873	0.871	1.157	1.143
Capana00g004560	218	K	POR_DAUCA Protochlorophyllide reductase, chloroplastic OS=Daucus carota GN=POR1 PE=2 SV=1	POR1	1	0.000655091	97.594	QSDYPQK(1)R	2	6.1655	28		1.29	1.202	2.015	2.402	0.817	1.407	0.668				0.438		0.892	0.794			0.265	0.267			0.84	0.816	0.887	1.17	1.155	1.056	1.099	1.1	1.096	0.913	0.944	0.972	0.892	0.873	0.871	1.157	1.143
Capana00g004560	277	K	POR_DAUCA Protochlorophyllide reductase, chloroplastic OS=Daucus carota GN=POR1 PE=2 SV=1	POR1	1	1.02396e-54	174.05	DSK(1)VCNMLTMQEFHR	2	1.4305	36	1.368	1.441	1.509	1.28	1.596	1.443	0.638	0.633	0.757		0.674	0.697	1.183	1.3	1.314	0.75	0.81	0.671	0.589	0.788				0.558	1.17	1.155	1.056	1.099	1.1	1.096	0.913	0.944	0.972	0.892	0.873	0.871	1.157	1.143
Capana00g004560	343	K	POR_DAUCA Protochlorophyllide reductase, chloroplastic OS=Daucus carota GN=POR1 PE=2 SV=1	POR1	1	2.76324e-29	174.92	GYVSEEESGK(1)R	2	-6.9725	22		0.868	1.096	1.288	1.256	1.066	0.958	0.909	0.927	0.888	0.874	0.935	1.376	1.344		0.859	0.817	0.718	0.856	0.748	0.796	1.096	1.146	1.179	1.17	1.155	1.056	1.099	1.1	1.096	0.913	0.944	0.972	0.892	0.873	0.871	1.157	1.143
Capana00g004560	211	K	POR_DAUCA Protochlorophyllide reductase, chloroplastic OS=Daucus carota GN=POR1 PE=2 SV=1	POR1	1	0.000655091	97.594	LLLDDLK(1)QSDYPQK(1)R	2	5.7293	6		0.864	1.04	1.105	1.178	0.975	0.839																		1.17	1.155	1.056	1.099	1.1	1.096	0.913	0.944	0.972	0.892	0.873	0.871	1.157	1.143
Capana00g004571	114	K	Y1360_ARATH Thylakoid lumenal protein At1g03610, chloroplastic OS=Arabidopsis thaliana GN=At1g03600 PE=1 SV=1	At1g03600	1	1.40318e-08	179.36	ETSNYWVAK(1)YR	2	-7.9381	6							1.09			1.208			1.556									0.74	0.77	0.634	0.471	0.529	0.562	0.521	0.643	0.609	1.048	0.847	0.827	1.187	1.009	1.225	1.024	0.948
Capana00g004656	188	K	PEAM1_ARATH Phosphoethanolamine N-methyltransferase 1 OS=Arabidopsis thaliana GN=NMT1 PE=2 SV=1	NMT1	1	0.000173856	83.775	FYTK(1)VFQECNAGK	2	5.5412	3	0.935												0.4		1.665											0.885	0.852			0.572	0.733	0.819	0.82		0.654		1.759	1.346
Capana00g004663	294	K	GBLP_NICPL Guanine nucleotide-binding protein subunit beta-like protein OS=Nicotiana plumbaginifolia PE=2 SV=1	---	1	0	295.16	QESEMSAATAEGSTAAK(1)NK	2	-4.6851	22	1.11	1.103	1.316	1.448	1.526	1.455	0.622	0.403	0.446	0.613		0.782	1.338	1.366	1.638	0.847	0.722	0.922		0.698	0.649	0.997			1.076	1.085	1.093	1.228	1.21	1.199	0.763	0.776	0.783	0.968	0.961	0.954	1.035	1.038
Capana00g004663	39	K	GBLP_NICPL Guanine nucleotide-binding protein subunit beta-like protein OS=Nicotiana plumbaginifolia PE=2 SV=1	---	1	0.00533463	74.849	DK(1)SIIVWSLTK	2	-10.577	3																						1.085	0.955	0.96	1.076	1.085	1.093	1.228	1.21	1.199	0.763	0.776	0.783	0.968	0.961	0.954	1.035	1.038
Capana00g004663	185	K	GBLP_NICPL Guanine nucleotide-binding protein subunit beta-like protein OS=Nicotiana plumbaginifolia PE=2 SV=1	---	1	0.000152525	130.31	IWNLTNCK(1)LR	2	-6.9569	9				0.884	1.112	1.17		0.729	0.928	0.997							1.052	1.119				1.008			1.076	1.085	1.093	1.228	1.21	1.199	0.763	0.776	0.783	0.968	0.961	0.954	1.035	1.038
Capana00g004663	177	K	GBLP_NICPL Guanine nucleotide-binding protein subunit beta-like protein OS=Nicotiana plumbaginifolia PE=2 SV=1	---	1	0.00299358	87.895	TVK(1)IWNLTNCK	2	-6.683	7		0.429		0.761	0.723									0.627								1.478	1.5	1.483	1.076	1.085	1.093	1.228	1.21	1.199	0.763	0.776	0.783	0.968	0.961	0.954	1.035	1.038
Capana00g004663	140	K	GBLP_NICPL Guanine nucleotide-binding protein subunit beta-like protein OS=Nicotiana plumbaginifolia PE=2 SV=1	---	1	5.82794e-33	130	LWNTLGECK(1)YTIQEQDSHSDWVSCVR	3	4.9362	2								1.125		0.875															1.076	1.085	1.093	1.228	1.21	1.199	0.763	0.776	0.783	0.968	0.961	0.954	1.035	1.038
Capana00g004678	161	K	2AAB_ARATH Serine/threonine-protein phosphatase 2A 65 kDa regulatory subunit A beta isoform OS=Arabidopsis thaliana GN=PP2AA2 PE=1 SV=2	PP2AA2	1	9.63803e-05	71.935	VSSCGLFHIAYPSAPEPVK(1)NELR	3	-1.8049	4	1.355			0.748					1.315											0.582					1.194	1.223	1.151	1.046	1.045	1.042	1.12	1.118	1.14	0.914	0.899	0.898	0.982	1.001
Capana00g004704	102	K	GEK1_ARATH D-aminoacyl-tRNA deacylase OS=Arabidopsis thaliana GN=GEK1 PE=1 SV=2	GEK1	1	0.00580243	55.578	VDEVIFLSK(1)HTAASNR	2	3.3865	3												1.222				0.897							0.881		0.993	1.023	0.932	0.809	1.075	0.863	0.895	0.869	0.756	1.157	1.082	1.112	0.72	0.812
Capana00g004716	195	K	GLPQ_ECOLI Glycerophosphoryl diester phosphodiesterase OS=Escherichia coli (strain K12) GN=glpQ PE=1 SV=2	glpQ	1	9.09286e-17	159.93	NPVLINQHVK(1)WPGGK	2	2.957	22	1.137	1.005	1.076	1.017	1.058		0.945	0.912	0.954	1.06	1.118	1.098	0.902	1.072	0.88	0.949	0.96	0.959	0.934	1.076	0.999	0.894	0.994		0.964	0.897	0.954	0.909	0.905	0.896	1.049	1.08	1.099	1.097	1.087	1.088	0.991	1.017
Capana00g004721	323	K	Putative ovule protein	---	1	2.02263e-15	134.2	GSLSQLQQLGTK(1)K	2	-6.788	4												0.947					0.543		0.585					1.925
Capana00g004749	109	K	ZB14_MAIZE 14 kDa zinc-binding protein OS=Zea mays GN=ZBP14 PE=1 SV=1	ZBP14	1	0.00088886	51.128	AEEK(1)HCEILGQLLYTAK	2	0.04394	2														0.788					1.212						1.092	1.058	0.987	1.082	1.046	1.016	1.227	1.262	1.216	1.28	1.262	1.228	0.646	0.648
Capana00g004765	61	K	NCB5R_NEOFI NADH-cytochrome b5 reductase 1 OS=Neosartorya fischeri (strain ATCC 1020 / DSM 3700 / FGSC A1164 / NRRL 181) GN=cbr1 PE=3 SV=2	cbr1	1	1.02855e-07	136.84	TQLSHNVAK(1)FR	2	2.124	45	1.182	1.23	1.197	1.441	1.375	1.167	0.709	0.689	0.77	0.713	0.855	0.81	1.084	1.181	1.201	0.828	0.713	0.831	0.623	0.76	0.733	1.286	1.279	1.343	0.99	0.97	1.052	1.075	1.049	1.077	0.919	0.956	0.915	0.918	0.896	0.907	0.976	0.958
Capana00g004772	688	K	METE_CATRO 5-methyltetrahydropteroyltriglutamate--homocysteine methyltransferase OS=Catharanthus roseus GN=METE PE=2 SV=1	METE	1	3.26202e-07	110.06	EGVK(1)YGAGIGPGVYDIHSPR	2	-3.1717	18		1.041	1.079		1.252	0.947					0.701		1.028		1.092	1.053	1.015	0.683	0.838		1.271				1.183	1.17	1.156	1.064	1.035	1.044	1.034	1.042	1.053	1.168	1.145	1.144	0.973	0.982
Capana00g004772	524	K	METE_CATRO 5-methyltetrahydropteroyltriglutamate--homocysteine methyltransferase OS=Catharanthus roseus GN=METE PE=2 SV=1	METE	1	0.00150672	95.138	CVK(1)PPIIYGDVSRPK	3	-7.2757	19	1.275	1.05		1.157	1.146	1.225	0.939	1.089	1.063	1.077	0.936	1.163	1.111	0.945	0.988	0.611			1.032	0.807	1.005	0.381			1.183	1.17	1.156	1.064	1.035	1.044	1.034	1.042	1.053	1.168	1.145	1.144	0.973	0.982
Capana00g004772	28	K	METE_CATRO 5-methyltetrahydropteroyltriglutamate--homocysteine methyltransferase OS=Catharanthus roseus GN=METE PE=2 SV=1	METE	0.999998	3.28266e-53	141.88	FALESFWDGK(1)SAAEDLKK	3	-8.5574	18	1.414	1.271	0.615	0.627	0.772	0.751	1.432	1.161	1.195	1.176	1.208	1.108				0.837	0.557	0.655	1.115	1.261	0.847				1.183	1.17	1.156	1.064	1.035	1.044	1.034	1.042	1.053	1.168	1.145	1.144	0.973	0.982
Capana00g004772	739	K	METE_CATRO 5-methyltetrahydropteroyltriglutamate--homocysteine methyltransferase OS=Catharanthus roseus GN=METE PE=2 SV=1	METE	1	4.786e-241	246.85	K(1)YTEVKPALQNMVSAAK	2	-0.63082	87	1.198	1.08	1.081	1.212	1.239	1.282	1.073	1.101	1.148		0.92	1.049	1.341	1.114	1.105	0.933	0.854	0.807	1.005	0.904	0.856	0.588	0.565	0.546	1.183	1.17	1.156	1.064	1.035	1.044	1.034	1.042	1.053	1.168	1.145	1.144	0.973	0.982
Capana00g004772	617	K	METE_CATRO 5-methyltetrahydropteroyltriglutamate--homocysteine methyltransferase OS=Catharanthus roseus GN=METE PE=2 SV=1	METE	1	0.000843397	126.17	K(1)SEHAFYLNWAVHSFR	3	-8.3156	22	1.369	1.194	1.363	1.116	1.253	1.193	1.146	1.04	1.363	1.15		0.978	0.83	0.942	0.969	0.563	0.543		0.805	0.881	0.751		0.753	0.798	1.183	1.17	1.156	1.064	1.035	1.044	1.034	1.042	1.053	1.168	1.145	1.144	0.973	0.982
Capana00g004772	744	K	METE_CATRO 5-methyltetrahydropteroyltriglutamate--homocysteine methyltransferase OS=Catharanthus roseus GN=METE PE=2 SV=1	METE	1	0.0036296	77.696	YTEVK(1)PALQNMVSAAK	2	-4.4388	14	0.978	1.014	0.981	0.868		1.053	1.021	0.797	1.103	0.822			1.029		1.12		1.037	0.718	1.459						1.183	1.17	1.156	1.064	1.035	1.044	1.034	1.042	1.053	1.168	1.145	1.144	0.973	0.982
Capana00g004785	401	K	UBP12_ARATH Ubiquitin carboxyl-terminal hydrolase 12 OS=Arabidopsis thaliana GN=UBP12 PE=1 SV=2	UBP12	1	2.6333e-08	104.49	IICDVGEK(1)DIAEHLR	2	-2.819	14	1.44		1.187				1.134	1.121	1.021		0.67		0.757		0.826		0.86	0.669	1.132	1.096	1.086				1.451	1.161	1.276	1.079	0.885	1.024	1.177	1.14	1.076	0.912	1.009	1.011	1.015	0.91
Capana00g004800	154	K	CDPK3_ARATH Calcium-dependent protein kinase 3 OS=Arabidopsis thaliana GN=CPK3 PE=1 SV=1	CPK3	1	0.00890492	63.397	IIAK(1)GHYSER	2	-5.9233	3	1.05		1.389										0.561												2.128	1.304	1.294	1.136	1.208	1.157	0.963	0.868	0.868	1.103	0.906	0.904	0.707	1.017
Capana00g004800	90	K	CDPK3_ARATH Calcium-dependent protein kinase 3 OS=Arabidopsis thaliana GN=CPK3 PE=1 SV=1	CPK3	1	0.00119908	76.85	LQYACK(1)SIATR	2	-9.1303	8		1.043	1.167								0.751	1.008	1.241			1.071	1.007				0.712				2.128	1.304	1.294	1.136	1.208	1.157	0.963	0.868	0.868	1.103	0.906	0.904	0.707	1.017
Capana00g004800	82	K	CDPK3_ARATH Calcium-dependent protein kinase 3 OS=Arabidopsis thaliana GN=CPK3 PE=1 SV=1	CPK3	1	0.0150039	46.768	GQFGVTYLVTHEK(1)TR	2	-2.0364	1			1																						2.128	1.304	1.294	1.136	1.208	1.157	0.963	0.868	0.868	1.103	0.906	0.904	0.707	1.017
Capana00g004805	371	K	CRTSO_SOLLC Prolycopene isomerase, chloroplastic OS=Solanum lycopersicum GN=CRTISO PE=1 SV=1	CRTISO	1	0.0180649	62.969	EVGTPK(1)THR	2	-4.7923	4						1.097										1.264			0.969				0.67		1.067	1.075	1.026	1.085	1.058	1.059	1.003	1	1.034	0.675	0.677	0.661	1.123	1.193
Capana00g004833	214	K	Expp1 protein	---	1	1.28236e-10	126.21	HESVFNSWYEVK(1)NLR	2	5.9879	12			1.178	1.236	1.07	1.384	0.699			0.808		0.839	1.25		0.84	0.993						0.895		0.808	1.132	1.016	1.089	1.301	1.074	1.009	0.842	0.882	0.811	0.915	0.916	0.928	0.96	0.943
Capana00g004910	268	K	Putative pyridoxamine 5'-phosphate oxidase family protein-like	---	1	8.99151e-08	117.77	QYMAK(1)HQQGPSQQWGNFFYFR	3	-4.3133	12	1.567	1.483	1.247		1.314	1.168	0.656	0.819	1.036	0.683	0.79	0.815									0.422				1.339	1.273	0.963	0.947	0.908	0.872	1.061	1.074	1.105	0.9	0.919	0.621	0.929	1.052
Capana00g004931	42	K	PRS7A_ARATH 26S protease regulatory subunit 7 homolog A OS=Arabidopsis thaliana GN=RPT1A PE=2 SV=1	RPT1A	1	0.0139912	51.454	TYGLGPYSTSIK(1)K	2	-10.395	1	1																								1.126	1.119	1.139	1.1	1.11	1.078	1.005	0.974	1.056	1.006	0.996	0.981	0.995	1.018
Capana00g004931	324	K	PRS7A_ARATH 26S protease regulatory subunit 7 homolog A OS=Arabidopsis thaliana GN=RPT1A PE=2 SV=1	RPT1A	1	0.00599225	92.732	TQIFK(1)IHTR	2	-6.8641	3			0.974	1.13											0.897										1.126	1.119	1.139	1.1	1.11	1.078	1.005	0.974	1.056	1.006	0.996	0.981	0.995	1.018
Capana00g004931	106	K	PRS7A_ARATH 26S protease regulatory subunit 7 homolog A OS=Arabidopsis thaliana GN=RPT1A PE=2 SV=1	RPT1A	1	0.000564451	91.245	IISPNTEDAK(1)YVINVK	2	-4.0012	18	1.39		1.321	1.555	1.471	1.466	1.014		0.886	0.692		0.927	1.186		1.216	0.74	0.817	0.769	0.726		0.717	0.411		0.695	1.126	1.119	1.139	1.1	1.11	1.078	1.005	0.974	1.056	1.006	0.996	0.981	0.995	1.018
Capana00g004931	216	K	PRS7A_ARATH 26S protease regulatory subunit 7 homolog A OS=Arabidopsis thaliana GN=RPT1A PE=2 SV=1	RPT1A	1	2.24048e-07	162.52	VIGSELVQK(1)YVGEGAR	2	-4.5776	9	1.009		1.016	1.316	1.113		0.16						1.378	1.13	1.135			0.744							1.126	1.119	1.139	1.1	1.11	1.078	1.005	0.974	1.056	1.006	0.996	0.981	0.995	1.018
Capana00g004936	1443	K	CLAH1_ARATH Clathrin heavy chain 1 OS=Arabidopsis thaliana GN=CHC1 PE=1 SV=1	CHC1	1	0.000220543	108.93	IEK(1)HELLEMR	2	-7.296	18	1.232	1.247		0.971	1.046	1.014		0.996	1.144		0.982	0.851	0.841	0.882	0.766		0.796	0.993	1.078		1.162				1.055	1.049	1.106	0.892	0.885	0.89	1.273	1.258	1.263	1.063	1.106	1.076	0.865	0.859
Capana00g004936	241	K	CLAH1_ARATH Clathrin heavy chain 1 OS=Arabidopsis thaliana GN=CHC1 PE=1 SV=1	CHC1	0.999753	1.83105e-05	57.71	SLNAGQVTSK(1)FHVIELGAQPGKPSFTK	3	4.2661	7		1.004			0.941	0.833	1.292	1.444						0.768			0.718								1.055	1.049	1.106	0.892	0.885	0.89	1.273	1.258	1.263	1.063	1.106	1.076	0.865	0.859
Capana00g004936	389	K	CLAH1_ARATH Clathrin heavy chain 1 OS=Arabidopsis thaliana GN=CHC1 PE=1 SV=1	CHC1	1	4.43729e-07	101.82	FQELFAQTK(1)YK	2	-1.1261	14					0.59		0.888	1.057		1.052	0.834	1.271	0.89		0.796	1.069		1.014	1.501	1.17	1.031			0.839	1.055	1.049	1.106	0.892	0.885	0.89	1.273	1.258	1.263	1.063	1.106	1.076	0.865	0.859
Capana00g004947	63	K	CLPR1_ARATH ATP-dependent Clp protease proteolytic subunit-related protein 1, chloroplastic OS=Arabidopsis thaliana GN=CLPR1 PE=1 SV=1	CLPR1	1	0.0032213	81.642	SADHIPK(1)QFR	2	2.8481	9	0.839	0.969		0.876	0.828	0.768								1.205	1.233			1.361			0.921				0.869	0.94	0.866	0.866	0.879	0.888	0.94	0.945	1.023	0.91	0.927	0.924	1.068	1.045
Capana00g004955	59	K	KIRO_ACTDE Kirola OS=Actinidia deliciosa PE=1 SV=1	---	1	0.000185162	135.63	ICWK(1)YTHDGK	2	-6.3675	23	0.691	1.009	1.142	1.201	1.099	1.073	0.703	0.626	0.665	0.662	0.671	0.686	1.341	1.496	1.451	1.251	1.216		1.218	1.291	1.152	0.799	0.757	0.802	0.762	0.694	0.724	0.697	0.661	0.679	0.673	0.634	0.676	0.757	0.81	0.772	1.166	1.161
Capana00g004955	70	K	KIRO_ACTDE Kirola OS=Actinidia deliciosa PE=1 SV=1	---	1	0.00021548	114.93	ISK(1)QIFEVIDEEKK	3	-8.464	23	0.862		0.897		0.861	0.79		0.711	0.613	0.672	0.71		1.165	1.215	1.258	0.936	0.949		1.217	1.266	1.306	1.245	1.178	1.148	0.762	0.694	0.724	0.697	0.661	0.679	0.673	0.634	0.676	0.757	0.81	0.772	1.166	1.161
Capana00g004955	16	K	KIRO_ACTDE Kirola OS=Actinidia deliciosa PE=1 SV=1	---	1	4.21024e-07	125.17	AK(1)NDVFHDVFR	2	-7.8552	38		1.293	1.143		1.19	0.978	0.713	0.12	0.665			0.835	1.197		1.141	1.215	1.115	1.278	1.313	1.27	1.197	0.63	0.708		0.762	0.694	0.724	0.697	0.661	0.679	0.673	0.634	0.676	0.757	0.81	0.772	1.166	1.161
Capana00g004955	80	K	KIRO_ACTDE Kirola OS=Actinidia deliciosa PE=1 SV=1	---	1	0.000826632	83.775	QIFEVIDEEK(1)K	2	-6.9708	10				0.741					0.714				1.173	0.723			1.005		1.451	0.972		0.919	1.248	1.055	0.762	0.694	0.724	0.697	0.661	0.679	0.673	0.634	0.676	0.757	0.81	0.772	1.166	1.161
Capana00g004977	76	K	NDHM_POPJC NAD(P)H-quinone oxidoreductase subunit M, chloroplastic OS=Populus jackii GN=ndhM PE=2 SV=1	ndhM	1	1.54683e-07	115.35	PVEPQINVESK(1)NMSR	2	-6.1433	23	1.484	1.318	1.15		1.151	1.103	1.027	0.973	1.161	1.097	1.134	1.194	0.855	0.661	0.764	0.868	0.879	0.816	0.819	0.928		0.87	0.884	0.864	1.164	1.101	0.995	1.001	0.915	0.916	1.066	1.1	1.144	1.169	1.168	1.266	0.898	0.894
Capana00g005020	201	K	DNA mismatch repair protein MLH1-like	---	1	0.0091318	44.598	HLSAAYQFEK(1)LTGNK	2	-23.989	2				1.055		0.945
Capana00g005022	366	K	AGT21_ARATH Alanine--glyoxylate aminotransferase 2 homolog 1, mitochondrial OS=Arabidopsis thaliana GN=AGT2 PE=1 SV=1	AGT2	1	1.9059e-32	144.2	QK(1)HCAEVGSHLLGGLR	3	-0.31537	18		0.893			1.216		1.228								0.767	1.012		1.029		0.855					1.162	1.117	1.056	1.16	1.076	1.075	0.982	1.018	1.016	0.95	0.936	0.911	0.897	0.921
Capana00g005022	199	K	AGT21_ARATH Alanine--glyoxylate aminotransferase 2 homolog 1, mitochondrial OS=Arabidopsis thaliana GN=AGT2 PE=1 SV=1	AGT2	1	2.01979e-60	105.97	NAYHGGSANTIGLTALNNWK(1)YPIPQGEIHHVLNPNPYR	4	6.1292	10	1.525	0.963	1.157	1.113	1.154		1.271		1.314		0.655						0.299		0.549						1.162	1.117	1.056	1.16	1.076	1.075	0.982	1.018	1.016	0.95	0.936	0.911	0.897	0.921
Capana00g005022	44	K	AGT21_ARATH Alanine--glyoxylate aminotransferase 2 homolog 1, mitochondrial OS=Arabidopsis thaliana GN=AGT2 PE=1 SV=1	AGT2	1	0.00290167	56.938	PYK(1)GPLADEVLAK	2	-9.1108	6										1.148		1.177	1.096						0.707	0.856	1.016				1.162	1.117	1.056	1.16	1.076	1.075	0.982	1.018	1.016	0.95	0.936	0.911	0.897	0.921
Capana00g005036	240	K	GLTB1_ARATH Ferredoxin-dependent glutamate synthase 1, chloroplastic OS=Arabidopsis thaliana GN=GLU1 PE=1 SV=2	GLU1	1	2.85709e-13	141.44	IVK(1)EENVDDIER	2	-7.3359	26	1.028	1.18	1.382		1.154	1.374	1.471	0.95	1.583	0.781	1.158	1.238	1.155	1.406	1.485	1.153	1.204	0.898	0.464	0.46	0.567	0.352	0.31	0.247	1.157	1.127	1.131	0.994	1.017	1	1.459	1.423	1.421	1.096	1.099	1.113	0.917	0.936
Capana00g005036	809	K	GLTB1_ARATH Ferredoxin-dependent glutamate synthase 1, chloroplastic OS=Arabidopsis thaliana GN=GLU1 PE=1 SV=2	GLU1	1	2.78153e-183	240.94	MPSVTIEQAQK(1)NFCK	2	8.3697	25	1.245	0.905	0.466			0.59	1.291	1.941		0.887	1.323	1.052				1.374	1.285				0.904	0.265	0.47		1.157	1.127	1.131	0.994	1.017	1	1.459	1.423	1.421	1.096	1.099	1.113	0.917	0.936
Capana00g005036	997	K	GLTB1_ARATH Ferredoxin-dependent glutamate synthase 1, chloroplastic OS=Arabidopsis thaliana GN=GLU1 PE=1 SV=2	GLU1	1	8.92691e-111	218.58	LGGK(1)SNSGEGGEDPIR	2	0.36719	47	1.297	1.393	1.16	1.364	1.334	1.02	1.176	1.211	1.323	1.083	1.008	1.188	1.26	1.217	1.34	0.83	0.751	0.725	0.767	0.803	0.807	0.305	0.297	0.343	1.157	1.127	1.131	0.994	1.017	1	1.459	1.423	1.421	1.096	1.099	1.113	0.917	0.936
Capana00g005036	887	K	GLTB1_ARATH Ferredoxin-dependent glutamate synthase 1, chloroplastic OS=Arabidopsis thaliana GN=GLU1 PE=1 SV=2	GLU1	1	0.00056849	113.7	AFSEDTAK(1)R	2	-5.1085	19	0.613	0.772	0.833	0.728	1.282	1.323	1.905	1.923	1.74	1.351				0.968	0.88	0.735	0.74	0.844		0.682		0.564	0.548	0.57	1.157	1.127	1.131	0.994	1.017	1	1.459	1.423	1.421	1.096	1.099	1.113	0.917	0.936
Capana00g005036	122	K	GLTB1_ARATH Ferredoxin-dependent glutamate synthase 1, chloroplastic OS=Arabidopsis thaliana GN=GLU1 PE=1 SV=2	GLU1	1	2.26324e-13	181.08	ASHGIVK(1)DALVALGCMEHR	3	-8.3357	41	1.419	1.29	1.161	1.057	1.058	0.972	1.847	1.86	1.842	0.853	0.876	0.903	1.016	0.814	0.872	0.824	0.702	0.663	1.217	0.992	0.962	0.296	0.238	0.266	1.157	1.127	1.131	0.994	1.017	1	1.459	1.423	1.421	1.096	1.099	1.113	0.917	0.936
Capana00g005036	916	K	GLTB1_ARATH Ferredoxin-dependent glutamate synthase 1, chloroplastic OS=Arabidopsis thaliana GN=GLU1 PE=1 SV=2	GLU1	1	0.0104602	58.687	LLHK(1)AVR	2	-1.8789	9	0.717				0.855		1.516			1.129					0.781				0.461			1.393	1.058	1.09	1.157	1.127	1.131	0.994	1.017	1	1.459	1.423	1.421	1.096	1.099	1.113	0.917	0.936
Capana00g005036	193	K	GLTB1_ARATH Ferredoxin-dependent glutamate synthase 1, chloroplastic OS=Arabidopsis thaliana GN=GLU1 PE=1 SV=2	GLU1	1	4.52644e-05	151.22	DCNQMNEAK(1)K	2	-7.2329	22	1.771	1.631	1.262	1.554	1.358	1.276		1.164	1.234	0.743	0.748	0.825	0.93			0.595	0.627	0.617	0.609	0.481	0.574				1.157	1.127	1.131	0.994	1.017	1	1.459	1.423	1.421	1.096	1.099	1.113	0.917	0.936
Capana00g005036	184	K	GLTB1_ARATH Ferredoxin-dependent glutamate synthase 1, chloroplastic OS=Arabidopsis thaliana GN=GLU1 PE=1 SV=2	GLU1	1	1.87253e-06	144.16	LHTGVGMIFLPK(1)DCNQMNEAK	3	-7.5429	14	0.8	0.686	0.669	0.835	1.013	0.929	1.873	1.663	0.773	1.114		0.342	1.506		0.939			0.86							1.157	1.127	1.131	0.994	1.017	1	1.459	1.423	1.421	1.096	1.099	1.113	0.917	0.936
Capana00g005036	668	K	GLTB1_ARATH Ferredoxin-dependent glutamate synthase 1, chloroplastic OS=Arabidopsis thaliana GN=GLU1 PE=1 SV=2	GLU1	1	5.38814e-11	144.38	DSHLK(1)PHVLPTFFDVGK	3	-10.301	34	1.433	1.192	1.164	0.948	0.973	1.052	1.778	1.813	1.822	0.652	0.957	0.809		0.882	1.061	0.698		0.425	0.619	0.95	0.896	0.451	0.426		1.157	1.127	1.131	0.994	1.017	1	1.459	1.423	1.421	1.096	1.099	1.113	0.917	0.936
Capana00g005036	692	K	GLTB1_ARATH Ferredoxin-dependent glutamate synthase 1, chloroplastic OS=Arabidopsis thaliana GN=GLU1 PE=1 SV=2	GLU1	1	1.50932e-41	199.51	SLYK(1)LCEAADEAVR	2	-6.7494	23			0.956	1.214	1.119	1.205	1.191	1.341	1.689	1.013	0.946	1.051	1.359	0.931	0.938	1.113	0.857	1.038	1.1	0.933	0.866	0.393	0.386	0.361	1.157	1.127	1.131	0.994	1.017	1	1.459	1.423	1.421	1.096	1.099	1.113	0.917	0.936
Capana00g005036	528	K	GLTB1_ARATH Ferredoxin-dependent glutamate synthase 1, chloroplastic OS=Arabidopsis thaliana GN=GLU1 PE=1 SV=2	GLU1	1	0.00279236	71.219	VALSNPYGEWVK(1)ENLR	2	10.354	2						0.719	1.281																		1.157	1.127	1.131	0.994	1.017	1	1.459	1.423	1.421	1.096	1.099	1.113	0.917	0.936
Capana00g005036	912	K	GLTB1_ARATH Ferredoxin-dependent glutamate synthase 1, chloroplastic OS=Arabidopsis thaliana GN=GLU1 PE=1 SV=2	GLU1	1	0.00158073	83.474	QGGEYHGNNPEMSK(1)LLHK	3	-8.1597	1																	1								1.157	1.127	1.131	0.994	1.017	1	1.459	1.423	1.421	1.096	1.099	1.113	0.917	0.936
Capana00g005036	1080	K	GLTB1_ARATH Ferredoxin-dependent glutamate synthase 1, chloroplastic OS=Arabidopsis thaliana GN=GLU1 PE=1 SV=2	GLU1	1	2.83363e-07	136.84	PGEGGQLPGK(1)K	2	-5.5939	12			1.13		0.569				1.156	0.722							0.742		1.166	1.515					1.157	1.127	1.131	0.994	1.017	1	1.459	1.423	1.421	1.096	1.099	1.113	0.917	0.936
Capana00g005036	948	K	GLTB1_ARATH Ferredoxin-dependent glutamate synthase 1, chloroplastic OS=Arabidopsis thaliana GN=GLU1 PE=1 SV=2	GLU1	1	0.00318282	96.311	DLLEFK(1)SDR	2	-7.9736	19		0.723	0.708		0.817	0.768	0.833	1.385	1.88	1.232	0.655	1.496	1.696	0.698		1.009		1.042	1.573	0.6	0.699		0.62	0.567	1.157	1.127	1.131	0.994	1.017	1	1.459	1.423	1.421	1.096	1.099	1.113	0.917	0.936
Capana00g005036	603	K	GLTB1_ARATH Ferredoxin-dependent glutamate synthase 1, chloroplastic OS=Arabidopsis thaliana GN=GLU1 PE=1 SV=2	GLU1	1	5.13017e-05	69.915	PHMLYDYFK(1)QR	2	1.3199	6	0.661						1.365		1.369		0.771					0.88				0.954					1.157	1.127	1.131	0.994	1.017	1	1.459	1.423	1.421	1.096	1.099	1.113	0.917	0.936
Capana00g005036	921	K	GLTB1_ARATH Ferredoxin-dependent glutamate synthase 1, chloroplastic OS=Arabidopsis thaliana GN=GLU1 PE=1 SV=2	GLU1	1	6.4124e-246	257.55	QK(1)SESAYSVYQQHLANRPVNVLR	3	-3.3271	43	1.275	1.256	1.302	1.227	1.378	1.289	1.435	1.391	1.386	0.859	0.865	0.867	1.126	1.109	1.059	0.721	0.668	0.67	0.872	0.84	0.847	0.283	0.274		1.157	1.127	1.131	0.994	1.017	1	1.459	1.423	1.421	1.096	1.099	1.113	0.917	0.936
Capana00g005037	154	K	GLTB_SPIOL Ferredoxin-dependent glutamate synthase, chloroplastic OS=Spinacia oleracea PE=1 SV=3	---	1	6.79072e-92	183.08	VVNK(1)TVEIYNIDR	2	-7.0132	19		0.709		0.915	0.903		1.501	1.704	1.837	0.885	0.791	1.236	1.087		0.789	1.062	1.024	1.032	1.033	0.83	0.733	0.465	0.461		1.129	1.082	1.132	1.005	1.029	1.045	1.484	1.405	1.398	1.139	1.115	1.173	0.926	0.917
Capana00g005037	347	K	GLTB_SPIOL Ferredoxin-dependent glutamate synthase, chloroplastic OS=Spinacia oleracea PE=1 SV=3	---	1	2.13967e-10	150.81	VVAPVGQMQLK(1)NLIEAHVEK	3	-3.2595	41	1.557	1.345	1.176	1.183	1.261	0.891	1.892	1.808	1.713		1.009	0.985	1.111	0.747	0.778	0.79	0.601	0.553	0.814	0.606	0.674	0.241		0.265	1.129	1.082	1.132	1.005	1.029	1.045	1.484	1.405	1.398	1.139	1.115	1.173	0.926	0.917
Capana00g005041	94	K	RK14_NICTO 50S ribosomal protein L14, chloroplastic OS=Nicotiana tomentosiformis GN=rpl14 PE=3 SV=1	rpl14	1	1.98144e-17	140.3	YDDNAAVVIDQEGNPK(1)GTR	2	6.1458	18	1.265		1.097	0.841			0.305	0.772			1.046	0.429	1.238	1.167	1.238	0.605	0.914		1.017	1.005	0.928	1.49		1.643	0.894	0.857	0.851	1.005	0.958	0.988	0.934	0.917	0.905	1.097	1.111	1.102	0.952	0.9
Capana00g005060	25	K	RL18A_CASSA 60S ribosomal protein L18a OS=Castanea sativa GN=RPL18A PE=2 SV=1	RPL18A	1	0.00603856	60	ALPSENDEHPK(1)IYR	2	-3.9289	5	1.356	1.148		1.024									0.993				0.48
Capana01g000022	34	K	C79A2_ARATH Phenylalanine N-monooxygenase OS=Arabidopsis thaliana GN=CYP79A2 PE=1 SV=1	CYP79A2	1	0.00408664	83.358	ITSK(1)WNATVR	2	4.1498	10													1.623	0.711	0.811		1.522		0.876	0.733	0.793	1.018	0.929	0.984
Capana01g000037	131	K	PPA27_ARATH Probable inactive purple acid phosphatase 27 OS=Arabidopsis thaliana GN=PAP27 PE=2 SV=1	PAP27	1	3.7339e-07	108.3	TSLK(1)FQLINQR	2	0.09307	14					0.826	1.009	0.801	1.252	1.492	1.241		0.955					1.173	1.09	1.072	0.707	0.735	0.834		0.812	1.179	1.033	1.135	1.112	1.129	1.049	0.947	0.946	0.962	1.02	0.998	1.018	0.943	0.953
Capana01g000041	366	K	GUN1_PERAE Endoglucanase 1 OS=Persea americana GN=CEL1 PE=2 SV=1	CEL1	1	0.000295138	72.365	ISYMVGFGQK(1)YPLR	2	3.6319	3	1.066												0.802					1.133
Capana01g000056	634	K	FRAY2_DICDI Serine/threonine-protein kinase fray2 OS=Dictyostelium discoideum GN=fray2 PE=3 SV=1	fray2	1	0.0178294	58.286	QK(1)YWQLQQR	2	-17.709	3	0.895									1.105															1.98	1.052				0.743		0.807					1.009
Capana01g000061	68	K	Putative ovule protein	---	1	6.73338e-08	130.78	ASEIAECQK(1)DILEAR	2	-3.9224	17	0.764	1.555	1.609	1.567	1.208	1.522	1.462	0.813	1.218	0.636			0.963		0.34	1.024			0.648	0.668			0.465	0.536	1.202	0.89	0.733	1.028	0.702	0.814	1.18	1.232	1.111	1.045	1.13	0.921	0.897	0.981
Capana01g000075	79	K	AB3F_ARATH ABC transporter F family member 3 OS=Arabidopsis thaliana GN=ABCF3 PE=2 SV=1	ABCF3	1	0.00107901	78.157	LEK(1)HGLVKPQPTVR	3	-1.854	1		1																							1.08	1.226	1.219	1.047	1.08	1.171	1.17	1.208	1.159	1.014	0.827	1.018	0.891	0.827
Capana01g000078	383	K	BIP_SOLLC Luminal-binding protein OS=Solanum lycopersicum PE=2 SV=1	---	0.99969	0.00451924	51.569	VQQLLK(1)DYFDGKEPNK	3	-7.7579	5	1.083	1.105	1.025											1.218										0.569	1.039	1.022	1.021	0.94	0.898	0.902	0.975	0.98	0.973	1.227	1.262	1.255	0.995	0.999
Capana01g000078	129	K	BIP_SOLLC Luminal-binding protein OS=Solanum lycopersicum PE=2 SV=1	---	0.999992	9.01908e-08	126.48	IVNK(1)DGKPYIQVK	2	-6.0207	2														1.053										0.947	1.039	1.022	1.021	0.94	0.898	0.902	0.975	0.98	0.973	1.227	1.262	1.255	0.995	0.999
Capana01g000078	490	K	BIP_SOLLC Luminal-binding protein OS=Solanum lycopersicum PE=2 SV=1	---	1	0.000369475	95.138	NLGK(1)FDLTGIPPAPR	2	-0.44099	11	1.268	0.664	0.87	0.929	0.835					1.479			1.016			1.25		1.196		1.154	0.339				1.039	1.022	1.021	0.94	0.898	0.902	0.975	0.98	0.973	1.227	1.262	1.255	0.995	0.999
Capana01g000095	92	K	BR44L_HUMAN Brain protein 44-like protein OS=Homo sapiens GN=BRP44L PE=1 SV=1	BRP44L	1	0.000724106	90.306	WAK(1)SQGYMQQNAAK	2	-8.1218	13				1.407		1.361	1.129	1.1	1.127	0.846					1.011	0.883			0.773	0.689			0.674
Capana01g000144	8	K	RTNLB_ARATH Reticulon-like protein B2 OS=Arabidopsis thaliana GN=RTNLB2 PE=1 SV=1	RTNLB2	1	1.6395e-54	138.87	AEHEEHK(1)VEEQHEESMMDK	3	-3.9311	13			1.033	0.823	0.891	0.809	0.439		0.663	1.208			1.439	1.447	1.629			0.944	0.977	0.699					1.056	0.985	0.994	0.973	0.958	0.953	0.842	0.769	0.811	1.004	0.997	0.95	1.065	1.012
Capana01g000156	113	K	VATE_CITLI V-type proton ATPase subunit E OS=Citrus limon GN=VATE PE=2 SV=1	VATE	1	8.62323e-05	106.97	DLLNVSHHHNHHIYK(1)K	3	-1.9779	34	1.081	1.279	1.261				0.966	0.603	0.935	0.863	1.192	0.982	0.911	0.863	0.943		0.931	0.898	1.052	1.281				0.959	1.073	1.006	0.982	0.997	0.993	0.986	1.06	1.07	1.071	1.118	1.147	1.116	0.936	0.885
Capana01g000174	200	K	ISPF_CATRO 2-C-methyl-D-erythritol 2,4-cyclodiphosphate synthase, chloroplastic OS=Catharanthus roseus GN=ISPF PE=2 SV=1	ISPF	1	0.00530412	66.664	LLGADPSVVNLK(1)AK	2	-5.567	8			0.635	0.921					0.771	1.09	1.008	0.932									1.061		1.582		0.734	0.768	0.865	0.936	0.875	0.911	1.027	1.006	1.023	1.119	1.061	1.031	0.921	0.925
Capana01g000174	67	K	ISPF_CATRO 2-C-methyl-D-erythritol 2,4-cyclodiphosphate synthase, chloroplastic OS=Catharanthus roseus GN=ISPF PE=2 SV=1	ISPF	1	0.00539898	72.038	TPSK(1)SLPFR	2	-6.7609	3																						0.937	0.985	1.078	0.734	0.768	0.865	0.936	0.875	0.911	1.027	1.006	1.023	1.119	1.061	1.031	0.921	0.925
Capana01g000174	206	K	ISPF_CATRO 2-C-methyl-D-erythritol 2,4-cyclodiphosphate synthase, chloroplastic OS=Catharanthus roseus GN=ISPF PE=2 SV=1	ISPF	1	2.04662e-05	108.2	THEK(1)VDSLGENR	2	-7.9993	12		1.058	1.056		1.209	1.136				0.749	0.965	0.574				0.854	0.998			1.117	1.122	1.161			0.734	0.768	0.865	0.936	0.875	0.911	1.027	1.006	1.023	1.119	1.061	1.031	0.921	0.925
Capana01g000177	283	K	MDARP_ARATH Monodehydroascorbate reductase, chloroplastic OS=Arabidopsis thaliana GN=At1g63940 PE=2 SV=3	At1g63940	1	9.08425e-08	157.77	IK(1)HLESGSDGR	3	1.4568	34	0.983	0.923	0.998	0.873	0.84	0.828	0.96	0.789	0.961	0.85		1.072	0.971	0.892	0.99	0.927	0.978	0.971	1.103	1.136	1.023	1.341	1.318	1.275	0.879	0.833	0.846	0.937	0.923	0.928	0.937	0.944	0.935	1.022	1.012	1.049	1.087	1.036
Capana01g000177	95	K	MDARP_ARATH Monodehydroascorbate reductase, chloroplastic OS=Arabidopsis thaliana GN=At1g63940 PE=2 SV=3	At1g63940	1	1.7845e-33	121.96	LCIVTK(1)EPYAPYER	2	-2.2003	17	0.884	1.026		1.874	1.186		0.698	0.801	0.794	0.803	0.613	0.982		1.146	1.379	1.309	1.115	0.962	0.899					0.527	0.879	0.833	0.846	0.937	0.923	0.928	0.937	0.944	0.935	1.022	1.012	1.049	1.087	1.036
Capana01g000177	382	K	MDARP_ARATH Monodehydroascorbate reductase, chloroplastic OS=Arabidopsis thaliana GN=At1g63940 PE=2 SV=3	At1g63940	1	1.51074e-40	174	SAQHCVK(1)SLLTAHTHTYDYLPYFYSR	4	-3.6025	40	1.351	1.257	1.367	1.394	1.399	1.364	1.215	1.298	1.216	0.913	0.853	0.824	1.038	1.034	0.955	0.648	0.671	0.649	0.792	0.739	0.717	0.304			0.879	0.833	0.846	0.937	0.923	0.928	0.937	0.944	0.935	1.022	1.012	1.049	1.087	1.036
Capana01g000177	275	K	MDARP_ARATH Monodehydroascorbate reductase, chloroplastic OS=Arabidopsis thaliana GN=At1g63940 PE=2 SV=3	At1g63940	1	1.11821e-06	105.94	YEQLYQDNGVK(1)FVK	2	-1.7865	22		1.109					0.877	1.029	0.826		0.805	1.016	1.451	1.21	1.232	0.921	0.671	0.85			0.994	1.154	0.856	0.999	0.879	0.833	0.846	0.937	0.923	0.928	0.937	0.944	0.935	1.022	1.012	1.049	1.087	1.036
Capana01g000182	273	K	PYRB2_PEA Aspartate carbamoyltransferase 2, chloroplastic OS=Pisum sativum GN=PYRB2 PE=2 SV=1	PYRB2	1	0.00105605	83.214	SLAHLLAK(1)YQDVK	2	2.2525	12		1.359		1.19			0.824				1.046							0.7			0.78	1.73	0.371		0.81	0.818			1.03	0.97	0.888	0.902	0.904	1.023	1.244	0.998	1.067	1.029
Capana01g000202	373	K	APBLC_ARATH Beta-adaptin-like protein C OS=Arabidopsis thaliana GN=BETAC-AD PE=1 SV=2	BETAC-AD	1	7.21938e-07	102.03	K(1)HANQEVLYLSAK	2	-7.5741	4	1.211					1.011														0.946		0.832			1.202	1.422	1.201	1.085	0.785	1.111	1.231	1.13	1.328	0.736	1.069	0.987	1.091	0.987
Capana01g000202	7	K	APBLC_ARATH Beta-adaptin-like protein C OS=Arabidopsis thaliana GN=BETAC-AD PE=1 SV=2	BETAC-AD	1	2.47384e-13	130.99	SGHDSK(1)YFSTTK	2	-6.2722	14	1.322	1.334	1.208	0.882	1.107	1.052	0.994		0.791	0.766	0.689	0.752	1.099		1.201				0.802						1.202	1.422	1.201	1.085	0.785	1.111	1.231	1.13	1.328	0.736	1.069	0.987	1.091	0.987
Capana01g000205	597	K	ARID2_ARATH AT-rich interactive domain-containing protein 2 OS=Arabidopsis thaliana GN=ARID2 PE=2 SV=1	ARID2	1	0.0110007	51.454	TWNMLASYYFNVFLVK(1)R	3	-25.73	3																	0.728			0.933				1.339
Capana01g000221	86	K	GSTT1_ARATH Glutathione S-transferase T1 OS=Arabidopsis thaliana GN=GSTT1 PE=2 SV=1	GSTT1	1	3.18615e-05	112.7	AK(1)VDSVLDWHHSNLR	3	-8.4943	21	1.201	1.03	1.096	1.256	1.283	1.291	1.199	1.16	1.144	1.027	0.926	1.034	1.042	0.938	0.95	0.728	0.675	0.728	0.735		0.645			0.911	1.262	1.209	1.217	1.277	1.234	1.272	1	0.978	0.987	0.931	0.895	0.895	0.965	0.94
Capana01g000239	348	K	GSH1_SOLLC Glutamate--cysteine ligase, chloroplastic OS=Solanum lycopersicum GN=GSH1 PE=2 SV=1	GSH1	1	1.13709e-07	144.47	K(1)YVDCAGMSFR	2	-6.9558	20	0.877		0.912	1.219	1.366	1.24	0.958	1.066	0.985	0.954		0.904	1.534	1.269	1.172			0.84	0.763	0.876	0.778	0.855	0.693	0.738	0.926	0.903	0.919	0.904	0.873	0.9	1.003	0.977	1.003	1.021	0.973	1.019	0.963	1.008
Capana01g000239	462	K	GSH1_SOLLC Glutamate--cysteine ligase, chloroplastic OS=Solanum lycopersicum GN=GSH1 PE=2 SV=1	GSH1	1	2.37454e-06	123.92	DGLLK(1)HVAQDVVK	2	-4.7159	24	0.866	0.858	0.878	0.819	0.887	0.784	0.939	0.963	0.903	1.06	1.161	1.215	1.001	1.091	1.071	0.926	1.015	0.878	1.025	1.187	1.102	1.121	1.116	1.136	0.926	0.903	0.919	0.904	0.873	0.9	1.003	0.977	1.003	1.021	0.973	1.019	0.963	1.008
Capana01g000239	117	K	GSH1_SOLLC Glutamate--cysteine ligase, chloroplastic OS=Solanum lycopersicum GN=GSH1 PE=2 SV=1	GSH1	1	7.8796e-05	86.135	IGTEHEK(1)FGFEFGTLRPMK	3	-11.555	12		0.851	0.822	0.955	0.88	1.077	0.834		0.778			1.307	1.002	1.15	1.203									1.141	0.926	0.903	0.919	0.904	0.873	0.9	1.003	0.977	1.003	1.021	0.973	1.019	0.963	1.008
Capana01g000243	436	K	AMPN_ECOLI Aminopeptidase N OS=Escherichia coli (strain K12) GN=pepN PE=1 SV=2	pepN	1	5.71036e-15	138	DQEFSSDLGSRPVK(1)R	2	-2.3152	14			1.279	1.274	1.425	1.238	0.959			0.697	0.817		1.139		1.206		0.59		0.841	0.844	1.025		0.666		1.01	0.96	0.97	0.973	0.965	0.957	1.071	1.06	1.051	1.023	1.008	1.006	1.057	1.054
Capana01g000243	902	K	AMPN_ECOLI Aminopeptidase N OS=Escherichia coli (strain K12) GN=pepN PE=1 SV=2	pepN	1	2.28289e-08	167.06	LLK(1)HTAFDMR	2	-8.2955	24	0.898	0.934	0.941	0.948	1.009	0.985	0.964	0.895	0.967	0.963	1.024	0.969	1.08	1.162	1.118	0.999	1.06	1.055	1.17	1.268	1.202	0.746	0.782	0.858	1.01	0.96	0.97	0.973	0.965	0.957	1.071	1.06	1.051	1.023	1.008	1.006	1.057	1.054
Capana01g000243	207	K	AMPN_ECOLI Aminopeptidase N OS=Escherichia coli (strain K12) GN=pepN PE=1 SV=2	pepN	1	3.07919e-69	228.55	NTSLEGLYK(1)SSGNFCTQCEAEGFRK	3	4.5015	27	0.389	0.424	0.417	0.626	0.642	0.917	0.843	2.864	2.305	1.774	0.572		1.747	0.488	0.405	0.856	0.954	0.765	1.537	0.748	0.726				1.01	0.96	0.97	0.973	0.965	0.957	1.071	1.06	1.051	1.023	1.008	1.006	1.057	1.054
Capana01g000243	318	K	AMPN_ECOLI Aminopeptidase N OS=Escherichia coli (strain K12) GN=pepN PE=1 SV=2	pepN	1	0.00102712	51.07	IWTPAQDLPK(1)TEHAMYSLK	3	-8.4041	5							1.124			1.069			1.481	0.486		0.84									1.01	0.96	0.97	0.973	0.965	0.957	1.071	1.06	1.051	1.023	1.008	1.006	1.057	1.054
Capana01g000243	236	K	AMPN_ECOLI Aminopeptidase N OS=Escherichia coli (strain K12) GN=pepN PE=1 SV=2	pepN	1	1.63769e-10	139.7	ITFYQDRPDIMAK(1)YTCR	3	-6.6335	38	1.196	1.128	1.223	1.462	1.43	1.46	0.69	1.183	1.139	0.761	0.76	0.802	1.556	1.203	1.223	0.934	0.858	0.81	0.92	0.816	0.731	0.39	0.323		1.01	0.96	0.97	0.973	0.965	0.957	1.071	1.06	1.051	1.023	1.008	1.006	1.057	1.054
Capana01g000243	511	K	AMPN_ECOLI Aminopeptidase N OS=Escherichia coli (strain K12) GN=pepN PE=1 SV=2	pepN	1	2.72914e-20	195.4	MYK(1)TLLGSQGFR	2	-8.5135	21	1.022	0.679	0.653	1.04	0.986	1.161	0.73	1.135	1.334	0.844			1.531	0.891	0.867	1.145	1.296	1.266	1.19	0.789	0.67	0.772			1.01	0.96	0.97	0.973	0.965	0.957	1.071	1.06	1.051	1.023	1.008	1.006	1.057	1.054
Capana01g000243	331	K	AMPN_ECOLI Aminopeptidase N OS=Escherichia coli (strain K12) GN=pepN PE=1 SV=2	pepN	1	0.00846373	54.584	AAMK(1)WDEDVFGR	2	-7.7814	2								0.774									1.226								1.01	0.96	0.97	0.973	0.965	0.957	1.071	1.06	1.051	1.023	1.008	1.006	1.057	1.054
Capana01g000250	5	K	PIP1_SOLLC Probable aquaporin PIP-type pTOM75 OS=Solanum lycopersicum PE=2 SV=1	---	1	5.67436e-42	163.93	AENK(1)EEDVSLGANK(1)YR	3	-0.52249	32	0.971	0.992	0.956	1.059	2.043	1.035	0.483	1.404	1.336	1.083	0.512	1.112	1.537	0.846	0.847	0.52		0.551			0.638	0.879	1.088	1.107	0.842	0.824	0.808	0.965	0.972	0.955	0.803	0.785	0.821	0.948	1.037	0.971	1.002	0.971
Capana01g000250	15	K	PIP1_SOLLC Probable aquaporin PIP-type pTOM75 OS=Solanum lycopersicum PE=2 SV=1	---	1	0	334.51	EEDVSLGANK(1)YR	2	-9.0493	112	1.243	1.192	1.195	1.27	1.55	1.314	0.861	0.941	0.862	0.903	0.681	0.87	1.334	1.385	1.141	0.78	0.559	0.805	0.496	0.588	0.572	1.063	1.226	1.17	0.842	0.824	0.808	0.965	0.972	0.955	0.803	0.785	0.821	0.948	1.037	0.971	1.002	0.971
Capana01g000279	178	K	TLP_ACTDE Thaumatin-like protein OS=Actinidia deliciosa GN=tlp PE=1 SV=2	tlp	1	0.00164137	61.194	APGGYCNNPCTVYK(1)R	2	-2.8256	3															0.893								0.985	1.122														0.649
Capana01g000279	216	K	TLP_ACTDE Thaumatin-like protein OS=Actinidia deliciosa GN=tlp PE=1 SV=2	tlp	1	8.09968e-05	119.52	DDTSTK(1)SCPGGTNYR	2	-5.5144	4													1.101	1.292	0.918							0.689																0.649
Capana01g000289	39	K	ERG3_ORYSJ Elicitor-responsive protein 3 OS=Oryza sativa subsp. japonica GN=ERG3 PE=2 SV=1	ERG3	1	0.002351	101.48	TQEQK(1)SSVASGK	2	-7.1984	10	1.064	1.585	0.682	1.662								0.849	1.441		0.692	0.679			0.717			0.629			1.062	1.123	1.168	0.977	0.986	0.392	0.949	0.999	0.756	1.174	1.212	1.152	1.13	1.072
Capana01g000290	101	K	MBD6_ARATH Methyl-CpG-binding domain-containing protein 6 OS=Arabidopsis thaliana GN=MBD6 PE=1 SV=1	MBD6	1	0.00170726	76.563	SCSGK(1)NIGQMNNQDK	2	-6.5885	2							0.718														1.282							0.932
Capana01g000290	41	K	MBD6_ARATH Methyl-CpG-binding domain-containing protein 6 OS=Arabidopsis thaliana GN=MBD6 PE=1 SV=1	MBD6	0.967485	0.0127006	57.003	YYTNVETGK(0.033)NFYSK(0.967)K	2	15.157	3			1.364	0.95											0.686													0.932
Capana01g000293	57	K	SELH_MACFA Selenoprotein H OS=Macaca fascicularis GN=SELH PE=2 SV=2	SELH	1	9.71555e-183	250.16	ANSEPVSADPEPEK(1)R	2	-6.0776	36	1.623	1.358	1.626	1.056	0.937	1.004	0.378	0.422	0.371	0.978	1.15	1.016	1.215	1.056	1.252	0.731	0.917	0.789	0.491	0.45	0.509	1.467	1.602	1.603	1.183	1.103	1.126	1.101	1.129	1.148	0.771	0.775	0.814	1.041	1.045	1.099	0.727	0.72
Capana01g000304	282	K	RFC2_BOVIN Replication factor C subunit 2 OS=Bos taurus GN=RFC2 PE=2 SV=1	RFC2	1	0.00607441	54.27	IIK(1)NYDMAEYVK	2	-6.4769	4		0.908		1.029		1.05									1.013										0.918	0.924	1.009	1.029	1.189	1.077	0.715	0.753	0.753	0.86	0.957	0.98	0.948	0.922
Capana01g000304	242	K	RFC2_BOVIN Replication factor C subunit 2 OS=Bos taurus GN=RFC2 PE=2 SV=1	RFC2	1	0.000111894	103.76	VCDQPHPLHVK(1)NMVR	3	-9.6804	20		1.396	1.486	1.391	1.369	1.455	0.848	0.819	0.729	0.95	0.859		0.848	1.004	0.816	0.848	0.857		0.958	0.879	1.031			0.454	0.918	0.924	1.009	1.029	1.189	1.077	0.715	0.753	0.753	0.86	0.957	0.98	0.948	0.922
Capana01g000323	172	K	ARGD_ALNGL Acetylornithine aminotransferase, mitochondrial OS=Alnus glutinosa GN=AG118 PE=2 SV=1	AG118	0.999912	1.17891e-06	167.76	K(1)FQKFSHPDEK	3	4.0229	34	1.423	1.241	1.42		1.232	1.287				0.732		0.935	1.211	0.956	1.077		0.971	0.864	0.973	1.225		0.509	0.469	0.476	0.878	0.836	0.822	0.881	0.88	0.853	0.808	0.778	0.788	0.917	0.893	0.88	1.083	1.081
Capana01g000323	175	K	ARGD_ALNGL Acetylornithine aminotransferase, mitochondrial OS=Alnus glutinosa GN=AG118 PE=2 SV=1	AG118	1	0.000283475	107.08	FQK(1)FSHPDEK	2	2.7294	21			1.292	1.294		0.112	1.065	0.938			1.042		1.196	1.204		1.151		1.202	1.278				0.627	0.598	0.878	0.836	0.822	0.881	0.88	0.853	0.808	0.778	0.788	0.917	0.893	0.88	1.083	1.081
Capana01g000323	208	K	ARGD_ALNGL Acetylornithine aminotransferase, mitochondrial OS=Alnus glutinosa GN=AG118 PE=2 SV=1	AG118	1	0.00013987	127.03	TMGAVALTSK(1)EQYR	2	-11.372	8					1.325		1.46	0.072								1.324			0.13		1.565		1.152	0.971	0.878	0.836	0.822	0.881	0.88	0.853	0.808	0.778	0.788	0.917	0.893	0.88	1.083	1.081
Capana01g000323	168	K	ARGD_ALNGL Acetylornithine aminotransferase, mitochondrial OS=Alnus glutinosa GN=AG118 PE=2 SV=1	AG118	1	0.00934936	57.279	VFFSNSGTEANEAAIK(1)FAR	2	-4.8492	1																					1				0.878	0.836	0.822	0.881	0.88	0.853	0.808	0.778	0.788	0.917	0.893	0.88	1.083	1.081
Capana01g000326	234	K	BAG1_ARATH BAG family molecular chaperone regulator 1 OS=Arabidopsis thaliana GN=BAG1 PE=1 SV=1	BAG1	1	0.0118991	47.57	NSALGNHNANVPMHNK(1)NR	2	28.355	1				1
Capana01g000335	238	K	NUP50_HUMAN Nuclear pore complex protein Nup50 OS=Homo sapiens GN=NUP50 PE=1 SV=2	NUP50	1	0.00430598	51.454	LYVK(1)STDPADNAWK	2	-3.6093	2				0.787	1.213																				0.829	0.998	0.852	0.862	0.966	0.86	0.79	0.866	0.794	1.224	1.193	1.319	0.857	0.753
Capana01g000335	26	K	NUP50_HUMAN Nuclear pore complex protein Nup50 OS=Homo sapiens GN=NUP50 PE=1 SV=2	NUP50	1	0.000756688	86.243	SFTNDSEEVQGK(1)R	2	-7.0021	6										0.528		0.989							0.534			1.327	1.171	1.452	0.829	0.998	0.852	0.862	0.966	0.86	0.79	0.866	0.794	1.224	1.193	1.319	0.857	0.753
Capana01g000349	229	K	HTH_ARATH Protein HOTHEAD OS=Arabidopsis thaliana GN=HTH PE=1 SV=1	HTH	1	0.00434757	81.642	IHK(1)AYLTR	2	-5.8128	9	0.821					0.803			0.824				1.148		1.091	0.864			0.772			1.316		1.362	0.935	0.875	0.847	0.945	0.951	0.922	0.985	0.961	0.978	0.964	0.967	0.926	0.765	0.822
Capana01g000349	433	K	HTH_ARATH Protein HOTHEAD OS=Arabidopsis thaliana GN=HTH PE=1 SV=1	HTH	1	0.000115431	102.03	IIENIIESQSFSK(1)FR	2	3.9814	4																			1.046	0.77	0.542	1.642			0.935	0.875	0.847	0.945	0.951	0.922	0.985	0.961	0.978	0.964	0.967	0.926	0.765	0.822
Capana01g000354	80	K	RHM1_ARATH Probable rhamnose biosynthetic enzyme 1 OS=Arabidopsis thaliana GN=RHM1 PE=1 SV=1	RHM1	1	3.06425e-05	98.865	PNVDWCESHK(1)VETIR	3	-8.7094	16	1.008	1.176	1.078	1.344	1.41	1.414	0.654		0.657				1.105	1.217		0.84	0.863	0.848	0.613			0.806	0.966		1.138	1.035	1.047	1.038	1.11	1.033	0.857	0.913	0.957	0.964	0.85	0.886	0.987	1.014
Capana01g000355	750	K	PLDB1_ARATH Phospholipase D beta 1 OS=Arabidopsis thaliana GN=PLDBETA1 PE=2 SV=4	PLDBETA1	1	1.01901e-12	63.95	DTEIAMGAYQPHHTWANK(1)HTGPHAQIYGYR	4	-2.0884	5		1.659	1.627					0.765		0.523						0.425									1.232	1.064	1.131	1.234	1.235	1.202	1.308	1.146	1.156	0.775	0.805	0.878	0.952	0.975
Capana01g000378	154	K	Putative metallo-hydrolase/oxidoreductase superfamily protein-like (Fragment)	---	1	0.00160057	96.957	TLKPLSGK(1)FPNLR	2	1.012	14	0.947	0.948				1.026	1.162	1.087	1.119			0.855	1.044		1.04	1.007	0.997	1.026			1.08	0.661			0.95	0.955	0.944	1.004	1.032	0.946	1.114	1.114	1.136	0.929	0.852	0.887	1.061	1.041
Capana01g000496	194	K	F10AL_ARATH FAM10 family protein At4g22670 OS=Arabidopsis thaliana GN=At4g22670 PE=1 SV=1	At4g22670	1	5.40401e-05	93.162	DATAALEINPDSAK(1)GYK	2	-4.468	5							0.869	1.197	1.166				1.09		0.677										0.746	0.84	0.875	0.887	0.893	0.926	1.239	1.234	1.234	0.496	0.467	0.47	1.188	1.147
Capana01g000496	390	K	F10AL_ARATH FAM10 family protein At4g22670 OS=Arabidopsis thaliana GN=At4g22670 PE=1 SV=1	At4g22670	1	7.6292e-108	244.81	NPANLAK(1)HQANPK	2	-0.079346	42	1.134	1.091	1.144	1.062	1.056	1.03	1.141	0.918	1.159	0.432		0.476	0.978	1.183	1.227	0.881	0.949	0.96	1.318	1.533	1.434	0.641	0.624	0.63	0.746	0.84	0.875	0.887	0.893	0.926	1.239	1.234	1.234	0.496	0.467	0.47	1.188	1.147
Capana01g000497	62	K	VAS_ARATH Lipid transfer-like protein VAS OS=Arabidopsis thaliana GN=VAS PE=2 SV=1	VAS	1	0.00875968	72.922	EAVTK(1)DLDCLCK	2	-6.0136	5		0.933	1.01	1.261												0.955		0.841
Capana01g000498	147	K	Putative spindle assembly checkpoint component MAD1-like	---	1	5.17989e-14	153.33	FSVNK(1)TQDVEDR	2	-6.2079	10		0.52								1.278	1.392	1.206	0.762				0.479		1.203	0.862	1.491	0.806			0.874	0.793	0.772	1.023	1.011	0.971	0.672	0.687	0.645	1.933	1.955	1.988	0.724	0.747
Capana01g000505	219	K	EFGC_SOYBN Elongation factor G, chloroplastic OS=Glycine max GN=FUSA PE=3 SV=1	FUSA	1	0.00874975	65.156	QADK(1)YGVPR	2	-6.7719	2																				0.761	1.239				1.072	1.081	1.069	0.894	0.896	0.908	1.248	1.252	1.235	1.112	1.107	1.108	0.966	0.956
Capana01g000505	770	K	EFGC_SOYBN Elongation factor G, chloroplastic OS=Glycine max GN=FUSA PE=3 SV=1	FUSA	1	2.22007e-09	89.923	ASYVMQLAK(1)FDVVPQHIQNQLAK	3	-0.63522	12	1.156			0.864			1.38	1.276	1.294	1.101		1.152				0.56			0.616		0.602				1.072	1.081	1.069	0.894	0.896	0.908	1.248	1.252	1.235	1.112	1.107	1.108	0.966	0.956
Capana01g000505	230	K	EFGC_SOYBN Elongation factor G, chloroplastic OS=Glycine max GN=FUSA PE=3 SV=1	FUSA	1	0.00579365	74.269	ICFVNK(1)MDR	2	-4.4559	9			0.828		0.837		1.266		1.586			1.246		0.689			1.191				0.911	0.446			1.072	1.081	1.069	0.894	0.896	0.908	1.248	1.252	1.235	1.112	1.107	1.108	0.966	0.956
Capana01g000505	168	K	EFGC_SOYBN Elongation factor G, chloroplastic OS=Glycine max GN=FUSA PE=3 SV=1	FUSA	1	0.000923881	84.999	GITITSAATTTFWNK(1)HR	3	-4.1144	7		0.485				0.627			1.817	1.441								0.741	1.465	0.425					1.072	1.081	1.069	0.894	0.896	0.908	1.248	1.252	1.235	1.112	1.107	1.108	0.966	0.956
Capana01g000505	358	K	EFGC_SOYBN Elongation factor G, chloroplastic OS=Glycine max GN=FUSA PE=3 SV=1	FUSA	1	0.000168002	94.63	KGTIGGSFVPVLCGSAFK(1)NK	3	-9.2454	9					0.606	0.701				1.713			2.314	0.481	0.604	0.972		0.938	0.671						1.072	1.081	1.069	0.894	0.896	0.908	1.248	1.252	1.235	1.112	1.107	1.108	0.966	0.956
Capana01g000505	336	K	EFGC_SOYBN Elongation factor G, chloroplastic OS=Glycine max GN=FUSA PE=3 SV=1	FUSA	1	7.36927e-07	112.7	YLEGVEPDEATIK(1)R	2	-7.6012	3				0.933					0.957							1.11									1.072	1.081	1.069	0.894	0.896	0.908	1.248	1.252	1.235	1.112	1.107	1.108	0.966	0.956
Capana01g000509	181	K	STIP_SOYBN Heat shock protein STI OS=Glycine max GN=STI PE=2 SV=1	STI	1	5.85252e-08	95.138	NPNNLNLYLK(1)DQR	2	-8.9832	2					0.708							1.292													1.012	1.008	1.011	1.005	0.991	0.975	0.887	0.903	0.917	1.136	1.137	1.158	0.893	0.912
Capana01g000509	71	K	STIP_SOYBN Heat shock protein STI OS=Glycine max GN=STI PE=2 SV=1	STI	1	0.00352395	93.467	HDWGK(1)GYSR	2	-7.2569	19	1.11	1.062	1.143	1.181	1.071					0.991	0.85	0.878	1.023	0.92	0.812	0.854	0.857		1.066	0.872	0.944	1.042	1.089	1.237	1.012	1.008	1.011	1.005	0.991	0.975	0.887	0.903	0.917	1.136	1.137	1.158	0.893	0.912
Capana01g000509	309	K	STIP_SOYBN Heat shock protein STI OS=Glycine max GN=STI PE=2 SV=1	STI	1	1.42976e-24	151.52	YEDCIK(1)DCDTAVER	2	-3.4793	15	1.268	1.403	1.37	0.05		1.515	1.22	1.146	1.004			1.068		1.177		0.255	0.91			0.557			1.058		1.012	1.008	1.011	1.005	0.991	0.975	0.887	0.903	0.917	1.136	1.137	1.158	0.893	0.912
Capana01g000509	502	K	STIP_SOYBN Heat shock protein STI OS=Glycine max GN=STI PE=2 SV=1	STI	1	5.04547e-09	156.73	HDPQNPELLDGVK(1)R	2	-8.0713	17			1.49	1.572	1.585	1.396	0.76	0.689		0.908	1.043	0.913	1.12					0.828	0.786	0.913	0.909	0.667	0.691	0.73	1.012	1.008	1.011	1.005	0.991	0.975	0.887	0.903	0.917	1.136	1.137	1.158	0.893	0.912
Capana01g000509	489	K	STIP_SOYBN Heat shock protein STI OS=Glycine max GN=STI PE=2 SV=1	STI	1	1.52612e-14	108.41	TYQEGLK(1)HDPQNPELLDGVK	3	-1.7074	24	1.08	1.027	1.118	1.429	1.329	1.377		0.91	0.935	1.138		0.977	1.302	0.858	0.985	0.932	0.777	0.746	1.095		0.808	0.71	0.467		1.012	1.008	1.011	1.005	0.991	0.975	0.887	0.903	0.917	1.136	1.137	1.158	0.893	0.912
Capana01g000509	51	K	STIP_SOYBN Heat shock protein STI OS=Glycine max GN=STI PE=2 SV=1	STI	1	8.02585e-54	180.49	SAAYASLGK(1)YQEALADAQK	2	14.105	25	0.933	0.94	0.803	0.85	0.847	0.716	0.999	1.084		1.305	1.007	1.189	0.702	0.969	0.934	0.881	0.778	0.726		1.331		1.257	1.386	1.361	1.012	1.008	1.011	1.005	0.991	0.975	0.887	0.903	0.917	1.136	1.137	1.158	0.893	0.912
Capana01g000509	421	K	STIP_SOYBN Heat shock protein STI OS=Glycine max GN=STI PE=2 SV=1	STI	1	0.000609164	109.36	HYTESIK(1)R	2	-4.9345	3																						1.05	1	0.95	1.012	1.008	1.011	1.005	0.991	0.975	0.887	0.903	0.917	1.136	1.137	1.158	0.893	0.912
Capana01g000509	439	K	STIP_SOYBN Heat shock protein STI OS=Glycine max GN=STI PE=2 SV=1	STI	1	1.33208e-42	154.09	AACYTK(1)LAALPEGLK	2	-3.1269	43	0.65	0.551	0.572	1.071	1.174	1.031	0.847	1.046	0.821	1.254	0.775	0.741	1.221	0.945		1.409	1.326	1.651	1.451	1.002	0.953	1.082	0.361	1.067	1.012	1.008	1.011	1.005	0.991	0.975	0.887	0.903	0.917	1.136	1.137	1.158	0.893	0.912
Capana01g000509	482	K	STIP_SOYBN Heat shock protein STI OS=Glycine max GN=STI PE=2 SV=1	STI	1	0.000271955	65.404	ALK(1)TYQEGLK	2	-7.7753	6												0.955	1.117						1.087			0.942	0.711	1.188	1.012	1.008	1.011	1.005	0.991	0.975	0.887	0.903	0.917	1.136	1.137	1.158	0.893	0.912
Capana01g000509	510	K	STIP_SOYBN Heat shock protein STI OS=Glycine max GN=STI PE=2 SV=1	STI	1	0.00183745	79.059	CVEQINK(1)ANR	2	-4.6857	6				1.541	1.16	1.225				0.563				0.751	0.76										1.012	1.008	1.011	1.005	0.991	0.975	0.887	0.903	0.917	1.136	1.137	1.158	0.893	0.912
Capana01g000509	66	K	STIP_SOYBN Heat shock protein STI OS=Glycine max GN=STI PE=2 SV=1	STI	1	0.000272949	101.82	TVDLK(1)HDWGK	2	-7.1795	11				1.01		1.152		1.171		0.913		0.883		0.947				0.613		1.02	1.048	1.194	1.049		1.012	1.008	1.011	1.005	0.991	0.975	0.887	0.903	0.917	1.136	1.137	1.158	0.893	0.912
Capana01g000509	414	K	STIP_SOYBN Heat shock protein STI OS=Glycine max GN=STI PE=2 SV=1	STI	1	2.12833e-11	149.58	YPEAVK(1)HYTESIK	2	-4.7853	24	1.187	1.204	1.191	1.123	1.274	1.191	0.959	0.832	0.9	0.885	0.957	0.901	0.993	1.077	0.899	0.813	0.862	0.873	1.078	1.202	1.001	0.853	0.833	0.912	1.012	1.008	1.011	1.005	0.991	0.975	0.887	0.903	0.917	1.136	1.137	1.158	0.893	0.912
Capana01g000516	206	K	TL225_ARATH Thylakoid lumenal protein At1g12250, chloroplastic OS=Arabidopsis thaliana GN=At1g12250 PE=1 SV=1	At1g12250	1	6.98799e-181	235.02	QALCK(1)YASGTNPVTGVSTR	2	3.8556	43	0.422	0.415	0.413	0.372	0.418	0.393	0.474	0.522	0.515	0.626	0.635	0.662	1.204	1.174	1.175	1.116	1.13	1.132	1.633	1.7	1.626	2.066	2.013	2.164	0.453	0.492	0.448	0.478	0.474	0.468	0.571	0.543	0.574	0.628	0.619	0.612	1.268	1.22
Capana01g000516	102	K	TL225_ARATH Thylakoid lumenal protein At1g12250, chloroplastic OS=Arabidopsis thaliana GN=At1g12250 PE=1 SV=1	At1g12250	1	8.80567e-23	139.7	GEFGIGSAAQFGSADLK(1)K	2	6.3761	9													1.006	0.781			1.056	0.673					1.213	1.272	0.453	0.492	0.448	0.478	0.474	0.468	0.571	0.543	0.574	0.628	0.619	0.612	1.268	1.22
Capana01g000521	402	K	SKU5_ARATH Monocopper oxidase-like protein SKU5 OS=Arabidopsis thaliana GN=SKU5 PE=1 SV=1	SKU5	1	0.00672568	63.397	GTYNK(1)WDGIAR	2	-1.1889	3												0.742	1.371											0.887	1.214	1.306	1.291	1.2	1.272	1.228	1.172	1.234	1.255	0.586	0.508	0.578	1.413	1.362
Capana01g000523	127	K	TAL_HAES2 Transaldolase OS=Haemophilus somnus (strain 2336) GN=tal PE=3 SV=1	tal	1	5.52542e-15	153.52	ALSDSECYGLEK(1)SDLR	2	-2.7552	15	1.147	1.098			1.278	1.355	0.912	0.9		0.813	0.801	0.644			1.157	0.942	1.034			0.93		0.991	0.997		0.875	0.921	0.929	1.003	0.964	0.953	0.876	0.859	0.873	0.9	0.92	0.887	1.126	1.103
Capana01g000523	305	K	TAL_HAES2 Transaldolase OS=Haemophilus somnus (strain 2336) GN=tal PE=3 SV=1	tal	1	0.00493003	57.003	ESVTLPDEK(1)YSFTR	2	-5.6409	5															1.231	1.086		0.683				0.946		1.054	0.875	0.921	0.929	1.003	0.964	0.953	0.876	0.859	0.873	0.9	0.92	0.887	1.126	1.103
Capana01g000523	264	K	TAL_HAES2 Transaldolase OS=Haemophilus somnus (strain 2336) GN=tal PE=3 SV=1	tal	1	0.00885622	81.642	TK(1)LMAAAVR	2	-3.7537	7					0.5		0.879										0.695		0.627			1.004	2.295		0.875	0.921	0.929	1.003	0.964	0.953	0.876	0.859	0.873	0.9	0.92	0.887	1.126	1.103
Capana01g000523	258	K	TAL_HAES2 Transaldolase OS=Haemophilus somnus (strain 2336) GN=tal PE=3 SV=1	tal	1	2.09917e-07	142.56	AYNYIHK(1)YGHK	2	-6.6289	14		1.186	1.172			1.004	0.637		0.622	0.841					1.1		0.888	0.994	0.797			1.275	1.304	1.181	0.875	0.921	0.929	1.003	0.964	0.953	0.876	0.859	0.873	0.9	0.92	0.887	1.126	1.103
Capana01g000530	836	K	XYL1_ARATH Alpha-xylosidase OS=Arabidopsis thaliana GN=XYL1 PE=1 SV=1	XYL1	1	1.93617e-06	127.03	IWSEVQESK(1)YALDK	2	1.5434	12			0.128	0.723	1.027	0.824	0.772						1.232	1.284		1.192	1.07		0.91		1.501	1.337			1.152	1.046	1.029	1.013	1.066	0.975	0.727	0.757	0.748	0.766	0.754	0.729	1.24	1.176
Capana01g000530	337	K	XYL1_ARATH Alpha-xylosidase OS=Arabidopsis thaliana GN=XYL1 PE=1 SV=1	XYL1	1	0.000949603	58.338	IPLDVIWNDDDHMDGK(1)K	3	-8.1214	2													1.093	0.907											1.152	1.046	1.029	1.013	1.066	0.975	0.727	0.757	0.748	0.766	0.754	0.729	1.24	1.176
Capana01g000530	351	K	XYL1_ARATH Alpha-xylosidase OS=Arabidopsis thaliana GN=XYL1 PE=1 SV=1	XYL1	1	0.019651	45.939	DFTLNPVNYPGPK(1)LR	2	2.6195	2																	0.823					1.177			1.152	1.046	1.029	1.013	1.066	0.975	0.727	0.757	0.748	0.766	0.754	0.729	1.24	1.176
Capana01g000550	57	K	14KD_DAUCA 14 kDa proline-rich protein DC2.15 OS=Daucus carota PE=2 SV=1	---	1	0.0200269	60.709	CPK(1)NTLK	2	-0.15457	2					1.123															0.877					0.589	0.553	0.62	0.79	0.73	0.733	1.045	1.054	0.919	0.788	0.79	0.833	0.874	0.979
Capana01g000571	67	K	HS147_ARATH 14.7 kDa heat shock protein OS=Arabidopsis thaliana GN=HSP14.7 PE=2 SV=1	HSP14.7	1	0.00816432	73.655	STEPILVTGAPQK(1)FK	2	0.17727	1																								1	0.463	0.797	0.909	0.703	0.763	0.827	0.782	0.746	0.801	1.164	1.065	1.154	0.975	0.914
Capana01g000612	209	K	Putative mucin-19-like	---	1	0.000415028	72.031	TK(1)IEDVHIVCAPER	2	-1.6916	1														1											1.326	1.096	1.09	1.043	1.041	0.938	0.584	0.62	0.753	0.838	0.836	0.961	0.916	1.152
Capana01g000620	57	K	ZAT2_ARATH Zinc finger protein ZAT2 OS=Arabidopsis thaliana GN=ZAT2 PE=2 SV=1	ZAT2	1	0.0171126	49.097	NYGEQVSEPK(1)YTINNFRR	3	-8.8346	3										1.177											0.823
Capana01g000625	142	K	CCHC-type domain-containing protein	---	1	0.00691124	57.293	VINQIEK(1)DVGCK	2	-7.982	1														1											1.213		0.812			0.856	1
Capana01g000629	178	K	PE191_ARATH Peroxisome biogenesis protein 19-1 OS=Arabidopsis thaliana GN=PEX19-1 PE=1 SV=1	PEX19-1	1	0.00327879	105.81	YK(1)HQYQLIR	2	-8.3605	13		1.052	0.993		1.09		0.906	0.863		1.018	1.076			0.987	0.872						1.005	1.048	1.177	0.912	1.666	0.887	1.027	0.942	0.942	0.889	0.985	0.835	0.946	0.899	0.907	1.061		0.98
Capana01g000643	66	K	DCL_SOLLC Protein DCL, chloroplastic OS=Solanum lycopersicum GN=DCL PE=2 SV=1	DCL	1	1.76598e-17	126.21	EEENEPENEDATK(1)K	2	-6.5118	22	1.342	1.342	1.316		0.697	0.777	0.702	0.513	0.68	0.991	0.801	1.026	0.995	1.159	1.009	0.819		1.033	1.578	0.925	1.494	0.452	1.108	1.241	0.805	0.985	0.67	0.957	0.908	0.976	0.701	0.611	0.538	1.354	1.441	1.325	0.851	0.79
Capana01g000643	169	K	DCL_SOLLC Protein DCL, chloroplastic OS=Solanum lycopersicum GN=DCL PE=2 SV=1	DCL	1	0.0078369	58.286	FHPQFK(1)SR	2	-5.7637	2					1.021	0.979																			0.805	0.985	0.67	0.957	0.908	0.976	0.701	0.611	0.538	1.354	1.441	1.325	0.851	0.79
Capana01g000684	250	K	GAOX3_ARATH Gibberellin 20 oxidase 3 OS=Arabidopsis thaliana GN=20ox3 PE=2 SV=1	20ox3	1	0.00675789	59.67	GPSSIEGISK(1)SSYVR	2	-7.3747	2			1.126												0.874
Capana01g000687	178	K	HABP4_PAI-RBP1 domain-containing protein	---	1	0.00323736	78.816	SGTGYGNDFK(1)R	2	2.4809	4																				0.954	1.025		1.016	1.005	1.146	1.067	1.053	0.997	0.963	0.948	0.671	0.738	0.746	1.373	1.339	1.314	0.946	0.979
Capana01g000694	160	K	RK19_SPIOL 50S ribosomal protein L19, chloroplastic OS=Spinacia oleracea GN=RPL19 PE=1 SV=2	RPL19	1	6.14924e-07	87.573	GIVISK(1)QNAGIHTTIR	2	-3.5365	16		1.166	1.048	1.05	0.945		0.829	0.689	0.527				0.97	1.264	1.175	1.007	1.001	0.86			0.774	1.19	1.504		0.777	0.756	0.946	0.926	0.948	0.994	0.933	1.023	0.977	0.906	1.041	1.013	1.08	1.104
Capana01g000717	151	K	CLPR4_ARATH ATP-dependent Clp protease proteolytic subunit-related protein 4, chloroplastic OS=Arabidopsis thaliana GN=CLPR4 PE=1 SV=1	CLPR4	1	9.98973e-05	137.39	GTAWEQPPPDLASYLYK(1)NR	3	-4.1964	10	1.387				0.947	1.196	1.091		0.817	1.122		1.259	0.902						0.864	0.416					0.762	0.759	0.772	0.842	0.832	0.865	0.88	0.934	0.868	1.127	1.089	1.132	0.925	0.935
Capana01g000721	237	K	Putative lil3 family protein-like	---	1	0.00349872	125.17	KNEDIETLK(1)K	2	-7.9317	1																						1			0.879	0.93	0.919	0.969	1.063	1.008	0.848	0.858	0.918	0.918	0.885	0.936	0.997	1.067
Capana01g000721	263	K	Putative lil3 family protein-like	---	1	0.00261099	58.313	QWQASWQDENSSSSK(1)DS	2	9.7149	1						1																			0.879	0.93	0.919	0.969	1.063	1.008	0.848	0.858	0.918	0.918	0.885	0.936	0.997	1.067
Capana01g000753	453	K	RBM5_XENTR RNA-binding protein 5 OS=Xenopus tropicalis GN=rbm5 PE=2 SV=1	rbm5	1	0.0174773	42.835	DK(1)FTHVSR	2	0.78356	1																					1
Capana01g000791	172	K	ENDUA_XENLA Poly(U)-specific endoribonuclease-A OS=Xenopus laevis GN=endou-a PE=1 SV=1	endou-a	1	0.00421102	57.888	DYQIDCGEGK(1)K	2	-4.498	1														1											1.441	1.324	1.205	1.127	1.05	1.067	1.035	1.063	1.026	0.782	0.739	0.705	1.248	1.135
Capana01g000808	91	K	PMTE_ARATH Probable methyltransferase PMT14 OS=Arabidopsis thaliana GN=At4g18030 PE=1 SV=1	At4g18030	1	1.7625e-07	96.27	SCETK(1)YTDYTPCHEQDR	3	-1.5446	12	1.142	1.187	1.111	1.147	0.972	1.007							0.663		0.771										1.161	1.314	1.378	1.189	1.219	1.245	0.917	0.943	0.958	0.949	0.941	0.969	1.03	0.96
Capana01g000812	314	K	tobamovirus multiplication protein 2A	---	1	2.69699e-15	131.54	YPQTAVQPQEEK(1)K	2	-0.82965	34	0.93	1.015		1.249	1.099	1.032	0.697			0.896	0.936	0.868	1.066	1.178	1.039		0.858				0.553	1.142	1.345	1.097	1.129	0.929	0.956	1.061	1.13	0.995	0.784	0.631	0.763	0.942	0.874	0.944	1.102	1.136
Capana01g000823	302	K	KPYG_TOBAC Pyruvate kinase isozyme G, chloroplastic OS=Nicotiana tabacum PE=2 SV=1	---	1	0.000840736	68.49	VVHELK(1)DYLK	2	-7.8015	4	1.413		0.287	1.377									0.923												1.165	1.075	1.056	1.139	1.13	1.099	1.304	1.166	1.273	1.219	1.109	1.238	0.84	0.929
Capana01g000839	531	K	PDI13_ARATH Protein disulfide isomerase-like 1-3 OS=Arabidopsis thaliana GN=PDIL1-3 PE=2 SV=1	PDIL1-3	1	0.0101834	52.591	K(1)HASTPFK	2	-4.3023	3								0.702											1.116	1.182					0.922	0.935	0.885	0.84	0.808	0.86	1.06	1.038	1.019	0.605	0.586	0.615	1.144	1.117
Capana01g000843	166	K	CSLD3_ARATH Cellulose synthase-like protein D3 OS=Arabidopsis thaliana GN=CSLD3 PE=1 SV=1	CSLD3	1	0.00151213	81.578	EPYK(1)NTDLAENAVDPSGR	2	2.966	3			1.363		0.985											0.653
Capana01g000865	290	K	DUF1995 domain-containing protein	---	1	1.64101e-08	114.39	METVYYIHNFK(1)GR	2	-1.5925	8			0.962	0.869									1.177	1.104	0.887										1.006	1.087	0.96	1.057	0.955	0.986	0.997	1.158	1.044	0.764	0.985	0.96	1.088	1.079
Capana01g000877	132	K	TPL_ARATH Protein TOPLESS OS=Arabidopsis thaliana GN=TPL PE=1 SV=1	TPL	1	0.0142722	66.664	QNEQLSK(1)YGDTK	2	-22.794	2																		0.99						1.01
Capana01g000893	237	K	KPPR_WHEAT Phosphoribulokinase, chloroplastic OS=Triticum aestivum PE=2 SV=1	---	1	1.34445e-06	108.24	K(1)PDFDAYIDPQK	2	-8.1183	17	0.751				0.625	0.745	0.95		0.819	0.943	0.922	0.843		0.859	0.819		0.766	1.329		1.045	0.952	1.535	1.543	1.554	0.841	0.87	0.877	0.839	0.831	0.855	1.047	1.073	1.083	1.121	1.118	1.077	0.952	0.919
Capana01g000893	214	K	KPPR_WHEAT Phosphoribulokinase, chloroplastic OS=Triticum aestivum PE=2 SV=1	---	1	0.0103907	69.093	FAWK(1)IQR	2	-7.6395	10									0.935	0.75				0.577		0.905	0.758			0.816	0.675	1.48	1.517	1.586	0.841	0.87	0.877	0.839	0.831	0.855	1.047	1.073	1.083	1.121	1.118	1.077	0.952	0.919
Capana01g000893	148	K	KPPR_WHEAT Phosphoribulokinase, chloroplastic OS=Triticum aestivum PE=2 SV=1	---	1	0.000644212	98.167	ANDFDLMYEQVK(1)AIK	2	1.3976	3																						0.782	1.103	1.116	0.841	0.87	0.877	0.839	0.831	0.855	1.047	1.073	1.083	1.121	1.118	1.077	0.952	0.919
Capana01g000893	230	K	KPPR_WHEAT Phosphoribulokinase, chloroplastic OS=Triticum aestivum PE=2 SV=1	---	1	0.0183952	50.314	GHSLESIK(1)ASIEAR	2	-6.9913	2																							1.155	0.845	0.841	0.87	0.877	0.839	0.831	0.855	1.047	1.073	1.083	1.121	1.118	1.077	0.952	0.919
Capana01g000893	76	K	KPPR_WHEAT Phosphoribulokinase, chloroplastic OS=Triticum aestivum PE=2 SV=1	---	1	1.08239e-139	212.69	TVVIGLAADSGCGK(1)STFMR	2	-1.6021	35	0.667	0.788	0.55	0.938	0.965	1.011	1.793	2.307	1.903		0.642	0.728	1.108	1.014	1.043	0.74	0.644	0.731	0.792	0.812		0.907	1.086	0.831	0.841	0.87	0.877	0.839	0.831	0.855	1.047	1.073	1.083	1.121	1.118	1.077	0.952	0.919
Capana01g000961	337	K	AB2E_ARATH ABC transporter E family member 2 OS=Arabidopsis thaliana GN=ABCE2 PE=2 SV=1	ABCE2	1	0.000578581	118.91	YPTMTK(1)TQGNFK	2	-6.6861	5		1.08									0.823		0.997			1.099									1.211	1.289	1.228	1.002	1.042	1.002	1.067	1.066	1.033	0.98	1.002	0.993	1.006	0.982
Capana01g000961	171	K	AB2E_ARATH ABC transporter E family member 2 OS=Arabidopsis thaliana GN=ABCE2 PE=2 SV=1	ABCE2	1	0.00496947	42.941	AVQGNVGQVLDQK(1)DER	2	-4.0123	1							1																		1.211	1.289	1.228	1.002	1.042	1.002	1.067	1.066	1.033	0.98	1.002	0.993	1.006	0.982
Capana01g000961	417	K	AB2E_ARATH ABC transporter E family member 2 OS=Arabidopsis thaliana GN=ABCE2 PE=2 SV=1	ABCE2	1	0.00427686	84.699	HLLHQK(1)IR	2	-6.1469	16	1.144	1.131		0.675	1.031	0.982	1.06			0.652	0.919	0.759	1.037		0.927	0.665	1.089	1.237		1.443	1.251				1.211	1.289	1.228	1.002	1.042	1.002	1.067	1.066	1.033	0.98	1.002	0.993	1.006	0.982
Capana01g000975	679	K	NUDT3_ARATH Nudix hydrolase 3 OS=Arabidopsis thaliana GN=NUDT3 PE=1 SV=1	NUDT3	1	0.00426277	58.313	TLLQK(1)YGVMTPSLK	2	1.0175	1																	1								1.124	1.011	0.953	0.963	0.985	0.969	1.263	1.281	1.262	1.103	1.259	1.243	0.91	0.917
Capana01g000983	323	K	AP4E_ARATH AP-4 complex subunit epsilon OS=Arabidopsis thaliana GN=At1g31730 PE=1 SV=1	At1g31730	1	0.00793498	62.969	FLK(1)NDSHNLK	2	-5.6581	4	1.09			0.944	0.966																				1.337	1.28	1.127	1.023	1.033	1.086	0.915	1.06	1.069	0.916	0.905	0.953	0.965	1.053
Capana01g000988	356	K	PUR9_LISMF Bifunctional purine biosynthesis protein PurH OS=Listeria monocytogenes serotype 4b (strain F2365) GN=purH PE=3 SV=1	purH	1	0.00170228	42.495	PTCVVVK(1)HTNPCGVASR	3	-5.3271	2					1.171	0.829																			1.035	0.95	1.016	1.006	0.986	1.025	1.108	1.121	1.124	1.123	1.109	1.138	0.943	0.901
Capana01g000988	582	K	PUR9_LISMF Bifunctional purine biosynthesis protein PurH OS=Listeria monocytogenes serotype 4b (strain F2365) GN=purH PE=3 SV=1	purH	1	0.000271364	92.428	DK(1)DAVECCNK	2	-6.3306	8	1.038	1.017	0.909		1.239	1.155	0.829	0.983			0.83														1.035	0.95	1.016	1.006	0.986	1.025	1.108	1.121	1.124	1.123	1.109	1.138	0.943	0.901
Capana01g000988	502	K	PUR9_LISMF Bifunctional purine biosynthesis protein PurH OS=Listeria monocytogenes serotype 4b (strain F2365) GN=purH PE=3 SV=1	purH	1	6.85583e-58	184.31	TPQENELTDAQFAWLCVK(1)HVK	3	0.34117	23	1.623	1.949	1.121	1.678	1.682	1.686		1.06	1.061	0.849	0.879	0.895	0.937	0.655	0.689		0.494	0.493		0.644	0.515			0.089	1.035	0.95	1.016	1.006	0.986	1.025	1.108	1.121	1.124	1.123	1.109	1.138	0.943	0.901
Capana01g000988	505	K	PUR9_LISMF Bifunctional purine biosynthesis protein PurH OS=Listeria monocytogenes serotype 4b (strain F2365) GN=purH PE=3 SV=1	purH	1	1.54208e-05	115.41	HVK(1)SNAIVIAK	2	-6.7689	23	1.334	1.315	1.358	1.484	1.505	1.447	0.943	0.883	0.847	0.877	0.855	0.843	1.09	1.119	1.156	0.774	0.753	0.732	0.778	0.853	0.752	0.677		0.626	1.035	0.95	1.016	1.006	0.986	1.025	1.108	1.121	1.124	1.123	1.109	1.138	0.943	0.901
Capana01g000988	143	K	PUR9_LISMF Bifunctional purine biosynthesis protein PurH OS=Listeria monocytogenes serotype 4b (strain F2365) GN=purH PE=3 SV=1	purH	1	8.1183e-05	99.589	VK(1)TLHPGIHGGILAR	2	-4.2777	22	0.953		0.961	1.252			0.989			0.695				1.029	1.225		1.023	0.984	0.676	1.251	0.826	0.942		1.192	1.035	0.95	1.016	1.006	0.986	1.025	1.108	1.121	1.124	1.123	1.109	1.138	0.943	0.901
Capana01g001001	63	K	RL132_BRANA 60S ribosomal protein L13-2 OS=Brassica napus PE=2 SV=1	---	1	2.2425e-14	164.3	PTAGSLRPIVHGQTLK(1)YNMK	3	0.15039	52	1.196	1.053	1.007	1.116	1.344	1.152	1.066	1.107	1.067	0.821	0.815	0.804	1.135	1.188	0.892	1.195	0.901	0.998	1.239	1.152	0.928	0.421	0.404		1.282	1.239	1.254	1.192	1.131	1.153	0.978	0.982	0.989	0.803	0.82	0.816	1.067	1.096
Capana01g001001	13	K	RL132_BRANA 60S ribosomal protein L13-2 OS=Brassica napus PE=2 SV=1	---	1	0.0066283	72.042	HNNVIPNGHFK(1)K	3	-5.6048	15	1.409		1.323	1.191	1.201			0.984	1.155	0.536			1.132	0.972	1.014		0.754	0.833	0.942	0.864	0.693				1.282	1.239	1.254	1.192	1.131	1.153	0.978	0.982	0.989	0.803	0.82	0.816	1.067	1.096
Capana01g001001	14	K	RL132_BRANA 60S ribosomal protein L13-2 OS=Brassica napus PE=2 SV=1	---	1	1.14404e-05	138.55	K(1)HWQNYVR	2	-6.8574	24	1.283	1.335	1.323	1.242	1.253	1.12	0.731	0.888	0.922	0.737	0.78	0.789	1.163	1.182	1.239	1.082	1.161	1.13	1.048	1.11	0.937	0.52	0.509	0.514	1.282	1.239	1.254	1.192	1.131	1.153	0.978	0.982	0.989	0.803	0.82	0.816	1.067	1.096
Capana01g001028	198	K	Lon N-terminal domain-containing protein	---	1	7.02924e-05	83.214	EALHNLNCLEIK(1)LK	2	-0.70465	8	0.998	0.885	0.903	0.941	1.224	1.069		1.13	0.85																	1.098	1.151	0.362	0.844	0.965	1.151	1.06	0.745	1.326	1.05	1.143	1.016	1.241
Capana01g001041	271	K	CLPP4_ARATH ATP-dependent Clp protease proteolytic subunit 4, chloroplastic OS=Arabidopsis thaliana GN=CLPP4 PE=1 SV=1	CLPP4	1	1.66733e-42	165.72	VK(1)STLNYQEIMADPK	2	3.563	24	0.971	1.122	1.187	1.169		1.37	0.834	0.807	0.763		1.069	1.105	1.087	1.032	1.105	0.748	0.578	0.703	0.553	0.767		1.276	1.416	1.34	0.755	0.714	0.877	0.924	0.929	0.94	1.019	0.993	0.889	1.156	1.288	1.067	0.922	0.987
Capana01g001041	212	K	CLPP4_ARATH ATP-dependent Clp protease proteolytic subunit 4, chloroplastic OS=Arabidopsis thaliana GN=CLPP4 PE=1 SV=1	CLPP4	1	2.82489e-06	108.2	EIMHNK(1)DNVTK	2	-8.2194	14	0.851	0.813	0.852	0.74		0.837				0.753						0.677	1.714	0.691	0.93	0.993		1.351	1.337	1.461	0.755	0.714	0.877	0.924	0.929	0.94	1.019	0.993	0.889	1.156	1.288	1.067	0.922	0.987
Capana01g001041	217	K	CLPP4_ARATH ATP-dependent Clp protease proteolytic subunit 4, chloroplastic OS=Arabidopsis thaliana GN=CLPP4 PE=1 SV=1	CLPP4	1	3.86954e-28	159.12	DNVTK(1)IFSNCTGR	2	-7.2192	21	0.295	0.285	0.383	0.765		0.933		1.402	1.259	1.091	0.731	1.102	1.234	0.908	1.02	1.064	0.939	1.111	1.401	0.946		1.371	1.347	1.412	0.755	0.714	0.877	0.924	0.929	0.94	1.019	0.993	0.889	1.156	1.288	1.067	0.922	0.987
Capana01g001041	232	K	CLPP4_ARATH ATP-dependent Clp protease proteolytic subunit 4, chloroplastic OS=Arabidopsis thaliana GN=CLPP4 PE=1 SV=1	CLPP4	1	1.7247e-36	188.88	SYEQVQK(1)DIDRDR	2	-5.552	46	0.881	0.958	0.916	1.004	0.933	0.84	0.847		0.977	0.963	1.076	1.067				0.718	0.872		0.974		0.92	1.365	1.295	1.393	0.755	0.714	0.877	0.924	0.929	0.94	1.019	0.993	0.889	1.156	1.288	1.067	0.922	0.987
Capana01g001041	284	K	CLPP4_ARATH ATP-dependent Clp protease proteolytic subunit 4, chloroplastic OS=Arabidopsis thaliana GN=CLPP4 PE=1 SV=1	CLPP4	1	0.00501433	68.108	STLNYQEIMADPK(1)K	2	-5.4797	2															0.719									1.281	0.755	0.714	0.877	0.924	0.929	0.94	1.019	0.993	0.889	1.156	1.288	1.067	0.922	0.987
Capana01g001047	83	K	PYR1_ARATH Abscisic acid receptor PYR1 OS=Arabidopsis thaliana GN=PYR1 PE=1 SV=1	PYR1	1	1.15763e-29	135.5	HFIK(1)SCNVDENFR	2	-2.1254	25	1.352		1.599	1.699	1.581	1.675	0.756	0.851	0.67	0.913	0.989	0.943	1.051	1.116		0.672	0.861	0.716	0.652	0.706	0.878			0.319	1.172	1.146	0.999	1.034	0.76	1.235	1.082	0.906	0.959		1.135	1.055	0.978	0.92
Capana01g001049	220	K	ARGE_DICDI Acetylornithine deacetylase OS=Dictyostelium discoideum GN=argE PE=1 SV=2	argE	1	0.000842032	71.219	LHVTGK(1)LFHSGLAHK	3	-8.5026	5															0.755						0.86	1.161	1.086	1.138	1.082	1.08	1.01	1.055	1.036	1.033	0.995	1.005	0.981	0.834	0.833	0.826	1.03	1.03
Capana01g001049	331	K	ARGE_DICDI Acetylornithine deacetylase OS=Dictyostelium discoideum GN=argE PE=1 SV=2	argE	1	1.65429e-08	128.57	GPVSK(1)YVLPDENLR	2	-2.0759	17	1.31	1.502	1.458	1.508	0.938	1.105	0.487	0.558	0.55	0.296	0.499		1.549	1.49	1.521		0.88	0.871	0.478						1.082	1.08	1.01	1.055	1.036	1.033	0.995	1.005	0.981	0.834	0.833	0.826	1.03	1.03
Capana01g001079	196	K	ROC3_NICSY 28 kDa ribonucleoprotein, chloroplastic OS=Nicotiana sylvestris PE=1 SV=1	---	1	0.000738841	67.507	LYVSNLAWK(1)VR	2	-8.8996	1																						1			0.787	0.854	0.898	0.945	0.98	1.026	1.11	1.119	1.096	1.19	1.154	1.171	0.994	0.966
Capana01g001079	187	K	ROC3_NICSY 28 kDa ribonucleoprotein, chloroplastic OS=Nicotiana sylvestris PE=1 SV=1	---	1	4.88234e-05	92.445	HK(1)LYVSNLAWK	2	-7.6509	5					1.217	1.546					0.725		0.763									0.749			0.787	0.854	0.898	0.945	0.98	1.026	1.11	1.119	1.096	1.19	1.154	1.171	0.994	0.966
Capana01g001085	81	K	Succinate dehydrogenase [ubiquinone] iron-sulfur subunit, mitochondrial	---	1	1.24387e-07	83.775	VICK(1)TDAGYTCK	2	-6.2689	15			1.03			0.852	0.838	0.938	0.973	0.802		0.82	1.169	1.272	1.15	0.961			1.009		1.078		1.042	1.066	0.707	0.726	0.856	0.586	0.671	0.657	0.881	0.959	0.976	0.855	0.848	0.83	1.114	0.91
Capana01g001085	21	K	Succinate dehydrogenase [ubiquinone] iron-sulfur subunit, mitochondrial	---	1	0.00252676	57.003	CCETVEDGK(1)VECK	2	-4.3566	1																								1	0.707	0.726	0.856	0.586	0.671	0.657	0.881	0.959	0.976	0.855	0.848	0.83	1.114	0.91
Capana01g001085	45	K	Succinate dehydrogenase [ubiquinone] iron-sulfur subunit, mitochondrial	---	1	0.00430841	67.838	AAGK(1)PFCQCSSGITCTR	2	-1.5682	4																				0.072		1.202	1.282	1.444	0.707	0.726	0.856	0.586	0.671	0.657	0.881	0.959	0.976	0.855	0.848	0.83	1.114	0.91
Capana01g001119	194	K	NAD(P)-bd_dom domain-containing protein	---	1	0.0138897	49.058	PAFIYGK(1)R	2	-5.1421	2																					0.656	1.344			0.84	0.883	0.816	0.817	0.923	0.862	1.136	1.092	1.116	1.044	1.07	1.115	0.963	0.965
Capana01g001119	178	K	NAD(P)-bd_dom domain-containing protein	---	1	0.00313438	44.667	RAESEVLSK(1)FPSSGVVLRPAFIYGK	4	-10.638	2								1																	0.84	0.883	0.816	0.817	0.923	0.862	1.136	1.092	1.116	1.044	1.07	1.115	0.963	0.965
Capana01g001121	192	K	PLSB_CARTI Glycerol-3-phosphate acyltransferase, chloroplastic OS=Carthamus tinctorius PE=2 SV=1	---	1	1.46312e-24	126.29	EPFDYYK(1)FGQNYIR	2	5.6973	5																	0.634			0.863		1.442	0.971	1.091	0.964	0.938	0.922	0.953	0.95	0.935	0.919	0.911	0.884	1.076	1.024	1.023	0.973	0.965
Capana01g001121	288	K	PLSB_CARTI Glycerol-3-phosphate acyltransferase, chloroplastic OS=Carthamus tinctorius PE=2 SV=1	---	1	1.13686e-32	202.72	K(1)HMNDDPELADMK	2	-5.5474	24	1.108	1.07	1.144	1.231	1.33	1.1	1.007	0.918	0.904	0.84	0.88	0.849	1.193	1.233	1.216	0.845	0.863	0.972	0.901	0.889	0.878	0.799	0.9	0.93	0.964	0.938	0.922	0.953	0.95	0.935	0.919	0.911	0.884	1.076	1.024	1.023	0.973	0.965
Capana01g001148	83	K	EIF3G_XENTR Eukaryotic translation initiation factor 3 subunit G OS=Xenopus tropicalis GN=eif3g PE=2 SV=1	eif3g	1	0.00406732	45.183	SWPK(1)FGDAVHEDVGAR	2	2.1046	1	1																								0.9	0.959	0.932	0.908	0.917	0.971	0.904	0.856	0.919	1.218	1.177	1.133	0.945	0.933
Capana01g001179	148	K	PPOF_SOLLC Polyphenol oxidase F, chloroplastic OS=Solanum lycopersicum PE=3 SV=1	---	1	3.68315e-09	96.453	IRPPAHAADEEYIAK(1)YQLATSR	3	-0.1508	2					0.93	1.07																			1.355	1.097	1.149	2.153	2.222	2.173	0.453	0.418	0.294	1.163	1.432	1.463	0.66	0.636
Capana01g001190	47	K	Y4139_ARATH Uncharacterized aarF domain-containing protein kinase At4g31390, chloroplastic OS=Arabidopsis thaliana GN=At4g31390 PE=1 SV=1	At4g31390	1	3.83695e-41	168.05	SVTGK(1)FNQLVYNYPIR	2	6.435	15	1.883		0.763	0.813	0.496		1.838	1.508	1.416	1.157	0.505		0.96		0.478	1.187	0.96			0.81			0.224		1.043	0.956	0.894	0.698	0.729	0.909	1.419	1.481	1.425	0.922	1.11	1.035	0.981	0.928
Capana01g001202	138	K	SYWC_HUMAN Tryptophan--tRNA ligase, cytoplasmic OS=Homo sapiens GN=WARS PE=1 SV=2	WARS	1	0.00530113	43.306	CMWK(1)NLSVEESQR	2	2.5135	1												1													0.987	1.002	0.974	0.973	0.98	0.97	0.948	0.935	0.934	1.027	1.045	1.008	0.924	0.947
Capana01g001210	291	K	E135_ARATH Glucan endo-1,3-beta-glucosidase 5 OS=Arabidopsis thaliana GN=At4g31140 PE=1 SV=1	At4g31140	1	0.000339799	98.865	AAQK(1)FNQGFMTHISGGK	2	4.105	14	1.075	1.096	0.931				0.938	0.691	0.825	1.128		1.101		0.894				0.901		1.205		0.955	1.105	1.155	0.791	0.891	0.917	0.961	1.018	0.955	0.756	0.744	1.008	1.155	1.177	1.286	1.019	0.871
Capana01g001216	75	K	P2C60_ARATH Probable protein phosphatase 2C 60 OS=Arabidopsis thaliana GN=At4g31860 PE=2 SV=1	At4g31860	1	1.17735e-10	112.8	FCAK(1)YLHQQVLK	2	-7.6955	8	1.426		1.071	1.166	1.105			0.606	1.473				0.587		0.566
Capana01g001226	146	K	inner centromere protein	---	1	0.00297444	63.212	DFEAHK(1)VETEK	2	-5.0526	6							1.142							1.099		0.969	1.163	1.11				0.518			1.128	1.017	1.029	0.999	1.025	1.024	1.019	1.025	1.048	0.888	0.923	0.866	1.074	1.049
Capana01g001226	227	K	inner centromere protein	---	1	2.02099e-28	160.37	SLLEK(1)HWQEHGK	2	-10.361	26			1.12	1.047	1.122	1.132	1.26	1.08	1.117		0.648		0.768		0.761		0.825	0.881	1.039	1.106	1.096				1.128	1.017	1.029	0.999	1.025	1.024	1.019	1.025	1.048	0.888	0.923	0.866	1.074	1.049
Capana01g001226	51	K	inner centromere protein	---	1	0.00795867	49.097	SDVPSFQELEHLK(1)SK	2	3.6687	1		1																							1.128	1.017	1.029	0.999	1.025	1.024	1.019	1.025	1.048	0.888	0.923	0.866	1.074	1.049
Capana01g001226	322	K	inner centromere protein	---	1	1.6183e-16	147.72	VQELAEPHVQELK(1)K	2	1.262	18	0.984		1.041	1.003	0.847		0.867	0.691		0.885	0.681		1.034	1.145	1	1.172	1.107		1.471	1.569	1.27		0.576	0.658	1.128	1.017	1.029	0.999	1.025	1.024	1.019	1.025	1.048	0.888	0.923	0.866	1.074	1.049
Capana01g001226	135	K	inner centromere protein	---	1	0.00487343	120.33	LKDEIETK(1)NK	2	-6.1492	4													1.433		1.331	0.701				0.535					1.128	1.017	1.029	0.999	1.025	1.024	1.019	1.025	1.048	0.888	0.923	0.866	1.074	1.049
Capana01g001226	222	K	inner centromere protein	---	1	0.00137019	78.932	MTHYK(1)SLLEK	2	-4.1682	10	1.206	1.114			1.259	1.192			0.874			0.536	0.99		0.973				1.01			0.847			1.128	1.017	1.029	0.999	1.025	1.024	1.019	1.025	1.048	0.888	0.923	0.866	1.074	1.049
Capana01g001230	92	K	ARAK_ARATH L-arabinokinase OS=Arabidopsis thaliana GN=ARA1 PE=1 SV=1	ARA1	1	0.00725065	50.314	LASLEK(1)YSETAVVPR	2	-4.6832	1								1																	1.337	1.213	1.245	1.287	1.373	1.313	0.999	1.029	0.753	0.894	0.781	0.773	1.139	1.21
Capana01g001326	284	K	CXE8_ARATH Probable carboxylesterase 8 OS=Arabidopsis thaliana GN=CXE8 PE=2 SV=1	CXE8	1	0.00340602	70.806	GYAGDPLVDGQK(1)SFAK	2	-6.3889	6					0.948	1.024							1.249							0.821		0.867	1.091		1.086	0.959	0.977	1.046	1.021	1.007	0.869	0.881	0.874	0.833	0.832	0.798	1.07	1.106
Capana01g001333	467	K	GAUT1_ARATH Alpha-1,4-galacturonosyltransferase 1 OS=Arabidopsis thaliana GN=GAUT1 PE=1 SV=1	GAUT1	1	0.000326183	94.804	NPK(1)YLSMLNHLR	2	-2.3592	1		1																							1.109	1.07	1.07	1.285	1.11	1.175	1.058	1.01	0.948	0.961	1.217	0.574	1.011	1.333
Capana01g001333	462	K	GAUT1_ARATH Alpha-1,4-galacturonosyltransferase 1 OS=Arabidopsis thaliana GN=GAUT1 PE=1 SV=1	GAUT1	1	6.82723e-07	132.9	AAHPNTLSAGSSNLK(1)YR	2	3.6367	15	1.162	1.174		1.248	1.306	1.226		0.757	0.417	0.647	0.787		0.936	0.954			1.147	1.125	1.027	1.088					1.109	1.07	1.07	1.285	1.11	1.175	1.058	1.01	0.948	0.961	1.217	0.574	1.011	1.333
Capana01g001341	179	K	SUBL_ARATH Subtilisin-like protease OS=Arabidopsis thaliana GN=ARA12 PE=1 SV=1	ARA12	1	0.00193642	58.476	CEAGTK(1)FAPSNCNK	2	0.5863	2																	0.927		1.073
Capana01g001358	81	K	FN3KR_ARATH Protein-ribulosamine 3-kinase, chloroplastic OS=Arabidopsis thaliana GN=At3g61080 PE=1 SV=2	At3g61080	1	4.82816e-12	157.74	YDTDAGSFFVK(1)TNR	2	2.1431	38	1.05	1.145	1.092	1.232	1.189	1.25	0.88	1.197		0.957	0.918	0.901	1.025	0.978	0.918	0.82	0.745	0.804	0.849	0.795	0.744	1.113	1.153	1.244	1.022	1.05	0.97	1.004	0.977	1.008	1.037	1.067	1.041	0.983	1.028	1.004	0.959	0.922
Capana01g001363	161	K	PX115_ORYSJ Peroxisomal membrane protein 11-5 OS=Oryza sativa subsp. japonica GN=PEX11-5 PE=2 SV=1	PEX11-5	1	0.00585733	90.263	YK(1)DEQYQSK	2	-5.2461	3	1.446					1.272																		0.282	1.337	1.263	1.292	1.206	1.211	1.115	1.157	1.344	1.284	1.108	0.96	0.89	0.893	0.741
Capana01g001363	171	K	PX115_ORYSJ Peroxisomal membrane protein 11-5 OS=Oryza sativa subsp. japonica GN=PEX11-5 PE=2 SV=1	PEX11-5	1	0.0124328	78.178	LQK(1)SNER	2	-1.593	12	0.974	1.168					0.617	0.9	0.928		0.813		0.975		1.197						0.85	1.03	1.242	1.306	1.337	1.263	1.292	1.206	1.211	1.115	1.157	1.344	1.284	1.108	0.96	0.89	0.893	0.741
Capana01g001363	168	K	PX115_ORYSJ Peroxisomal membrane protein 11-5 OS=Oryza sativa subsp. japonica GN=PEX11-5 PE=2 SV=1	PEX11-5	1	0.00105504	101.64	YKDEQYQSK(1)LQK	2	-8.4171	2												0.804											1.196		1.337	1.263	1.292	1.206	1.211	1.115	1.157	1.344	1.284	1.108	0.96	0.89	0.893	0.741
Capana01g001375	595	K	Nitroreductase domain-containing protein	---	1	0.000241979	78.673	GSK(1)FQSLYHFTVGGPVVDK	3	-3.7745	19	1.149	1.245	1.256	1.213	1.301	1.268	0.995	0.92	0.993					0.853	0.858		0.683	0.707			0.558				1.488	1.113	1.22	1.351	1.071	1.146	1.076	1.235	0.966	0.768	0.753	0.676
Capana01g001378	100	K	AROA1_TOBAC 3-phosphoshikimate 1-carboxyvinyltransferase 1, chloroplastic OS=Nicotiana tabacum GN=EPSPS-1 PE=2 SV=1	EPSPS-1	1	0.000461323	108.3	LPGSK(1)SLSNR	2	-6.4318	10				0.857						1.058	1.013	1.144	0.953		0.893	1.035						0.998	1.013	1.037	1.056	1.056	1.008	1.085	1.073	1.1	1.05	1.009	1.028	0.985	1.004	0.979	1.025	1.016
Capana01g001378	394	K	AROA1_TOBAC 3-phosphoshikimate 1-carboxyvinyltransferase 1, chloroplastic OS=Nicotiana tabacum GN=EPSPS-1 PE=2 SV=1	EPSPS-1	1	0.0125126	72.492	NSSGMK(1)HLR	2	4.5576	4				0.766		1.231								0.596						1.408					1.056	1.056	1.008	1.085	1.073	1.1	1.05	1.009	1.028	0.985	1.004	0.979	1.025	1.016
Capana01g001392	275	K	TBL2_MOUSE Transducin beta-like protein 2 OS=Mus musculus GN=Tbl2 PE=2 SV=2	Tbl2	1	0.00351599	44.045	FIAAAAFTADVK(1)VWEVVYSK	3	12.612	2		1.154												0.846											1.041	1.011	1.079	1.127	1.127	1.183	0.756	0.678	0.686	0.754	0.691	0.772	1.256	1.147
Capana01g001409	556	K	BIG2_HUMAN Brefeldin A-inhibited guanine nucleotide-exchange protein 2 OS=Homo sapiens GN=ARFGEF2 PE=1 SV=3	ARFGEF2	1	0.00305613	104.39	SLGDWMNK(1)HLR	2	-0.067829	14		1.17		1.092	1.107	1.16		1.286	1.179	0.716	0.691		0.696		0.738		1.029		1.076	1.058					1.202	1.319	1.214	0.971	1.069	0.877	1.386	1.302	1.395	0.898	0.91	0.604	0.66	0.632
Capana01g001419	230	K	FLA10_ARATH Fasciclin-like arabinogalactan protein 10 OS=Arabidopsis thaliana GN=FLA10 PE=1 SV=1	FLA10	1	0.0113221	40.861	GLTIFAPNDEAFK(1)AVK	2	-12.555	1												1													0.659	0.638	0.629	0.704	0.667	0.71	1.209	1.169	1.086	1.106	1.147	1.147	0.659	0.598
Capana01g001469	23	K	SOT16_ARATH Sulfotransferase 16 OS=Arabidopsis thaliana GN=SOT16 PE=1 SV=1	SOT16	1	3.32724e-06	110.58	LSASYGSENFK(1)NMCEK	2	3.9818	14		1.413	1.221	1.281	1.316	1.659	1.019					0.57	0.742	0.905	0.738	0.905	0.682	0.82	0.732						1.474	1.413	1.722	1.796	1.532	1.468	0.868	0.99	0.988	0.727	0.765	0.719	0.776	0.799
Capana01g001480	188	K	FABI_BRANA Enoyl-[acyl-carrier-protein] reductase [NADH], chloroplastic OS=Brassica napus PE=1 SV=2	---	1	7.73035e-67	193.62	YAGSSK(1)WTVSEVAESVK	2	-2.5117	20		1.043	0.979	0.881	1.125	1.203			0.639	1.072	1.011	1.115	0.971	0.996	1.013	0.849	0.831	0.784		0.778	0.757	1.296	1.366	1.291	0.717	0.766	0.806	0.796	0.851	0.848	0.9	0.892	0.866	1.159	1.206	1.279	0.962	0.888
Capana01g001486	236	K	3-oxo-Delta(4,5)-steroid 5-beta-reductase-like	---	1	0.00356884	83.438	HEGLPLK(1)FPGVK	2	-9.6811	2																			0.692			1.308			1.139	1.114	1.01	1.2	1.088	1.191	0.948	0.989	0.968	0.922	0.87	0.905	1.021	1.058
Capana01g001487	367	K	FD6E2_SOYBN Omega-6 fatty acid desaturase, endoplasmic reticulum isozyme 2 OS=Glycine max GN=FAD2-2 PE=2 SV=1	FAD2-2	1	0.0121839	52.837	ECIYVEK(1)DEAAAQGK	2	-4.276	1	1																								1.3	1.244	1.121	1.141	1.158	0.835							1.121	0.962
Capana01g001516	68	K	UGPI5_ARATH Uncharacterized GPI-anchored protein At1g27950 OS=Arabidopsis thaliana GN=At1g27950 PE=1 SV=1	At1g27950	1	0.000327205	80.128	APTPDCCTGLK(1)EVLDK	2	-0.86419	5								1.094	1.04			0.951				0.22								1.695	0.962	0.947	0.822	0.846	0.864	1.045	1.3	1.233	1.22	1.027	0.881	0.642	0.788	0.813
Capana01g001519	140	K	Putative 6,7-dimethyl-8-ribityllumazine synthase-like	---	1	0.00263772	74.424	LVSK(1)WHPTTK	2	-7.9761	11			1.093	1.105	1.351		0.84		0.941		0.86		0.981		1.101	0.919	0.885	0.924							1.252	1.101	1.047	1.162	1.159	1.047	0.987	0.958	0.902	0.844	0.831	0.863	0.924	0.977
Capana01g001551	216	K	FTHS_SPIOL Formate--tetrahydrofolate ligase OS=Spinacia oleracea PE=1 SV=3	---	1	0.0166713	41.317	TAPEDLTPEEVSK(1)FAR	2	-3.7181	2					1.52											0.48									1.012	1.021	0.993	1.032	1.03	1.034	0.951	0.968	1.028	0.904	0.86	0.907	1.062	1.077
Capana01g001551	187	K	FTHS_SPIOL Formate--tetrahydrofolate ligase OS=Spinacia oleracea PE=1 SV=3	---	1	0.00062443	109.36	K(1)FCDIMFR	2	-8.7814	21	0.746	0.886	0.884		1.192		0.529	0.969	0.677	1		0.578	1.87	0.904	0.835	1.406	1.558	1.583	0.955	0.722	0.827	0.938	0.93	1.011	1.012	1.021	0.993	1.032	1.03	1.034	0.951	0.968	1.028	0.904	0.86	0.907	1.062	1.077
Capana01g001553	245	K	PERX_TOBAC Lignin-forming anionic peroxidase OS=Nicotiana tabacum PE=2 SV=1	---	1	0.000448789	56.08	LDK(1)STPDQFDNHYFTNLK	3	-4.7663	5													1.12	1.127	1.173							0.579			0.552	0.549	0.54	0.623	0.621	0.633	0.434	0.452	0.468	0.698	0.706	0.708	1.408	1.388
Capana01g001574	198	K	LOX21_SOLTU Linoleate 13S-lipoxygenase 2-1, chloroplastic OS=Solanum tuberosum GN=LOX2.1 PE=1 SV=1	LOX2.1	0.997694	9.61647e-05	77.431	VDITCNSWVHSK(0.998)FDNPDK(0.002)R	3	-1.7031	12	1.286		1.298		0.947	0.883	0.883	1.111	1.153		0.745								0.695						1.365	1.329	1.225	1.029	1.053	1.04	1.221	1.257	1.249	1.079	1.072	1.04	1.015	1.049
Capana01g001574	175	K	LOX21_SOLTU Linoleate 13S-lipoxygenase 2-1, chloroplastic OS=Solanum tuberosum GN=LOX2.1 PE=1 SV=1	LOX2.1	1	0.00128227	99.276	QMYVK(1)NIVIDGFVHGK	3	-3.2078	14	1.575		0.925	1.111	1.028		1.407	1.319	1.346	0.831		0.772		0.533	0.601						0.553				1.365	1.329	1.225	1.029	1.053	1.04	1.221	1.257	1.249	1.079	1.072	1.04	1.015	1.049
Capana01g001574	211	K	LOX21_SOLTU Linoleate 13S-lipoxygenase 2-1, chloroplastic OS=Solanum tuberosum GN=LOX2.1 PE=1 SV=1	LOX2.1	1	0.000902061	78.888	IFFTNK(1)SYLPSQTPSGVK	2	-1.2283	3			0.953	1.249										0.798											1.365	1.329	1.225	1.029	1.053	1.04	1.221	1.257	1.249	1.079	1.072	1.04	1.015	1.049
Capana01g001578	215	K	LOX21_SOLTU Linoleate 13S-lipoxygenase 2-1, chloroplastic OS=Solanum tuberosum GN=LOX2.1 PE=1 SV=1	LOX2.1	1	0.00382944	65.212	VFFTNK(1)SYLPSQTPSGVK(1)R	2	8.5027	2													0.745			1.255									0.782	0.736	0.719	0.601	0.603	0.594	0.747	0.75	0.745	0.549	0.548	0.555	1.423	1.454
Capana01g001578	426	K	LOX21_SOLTU Linoleate 13S-lipoxygenase 2-1, chloroplastic OS=Solanum tuberosum GN=LOX2.1 PE=1 SV=1	LOX2.1	1	0.000217361	108.34	SK(1)LDPEVYGPPESAITK	2	-3.4091	12		0.699	0.605			0.646			0.668	0.395					1.564	1.706		1.494	1.289		1.102	0.917	0.914		0.782	0.736	0.719	0.601	0.603	0.594	0.747	0.75	0.745	0.549	0.548	0.555	1.423	1.454
Capana01g001578	203	K	LOX21_SOLTU Linoleate 13S-lipoxygenase 2-1, chloroplastic OS=Solanum tuberosum GN=LOX2.1 PE=1 SV=1	LOX2.1	1	9.41399e-119	218.79	VFFTNK(1)SYLPSQTPSGVK(1)R	2	8.5027	22		0.787	0.746		0.716	0.839	0.742			0.88		0.661	1.616		0.884	1.535	1.347	1.42	1.105	1.152		0.826	0.744		0.782	0.736	0.719	0.601	0.603	0.594	0.747	0.75	0.745	0.549	0.548	0.555	1.423	1.454
Capana01g001578	190	K	LOX21_SOLTU Linoleate 13S-lipoxygenase 2-1, chloroplastic OS=Solanum tuberosum GN=LOX2.1 PE=1 SV=1	LOX2.1	1	3.80392e-06	148.57	VNITCNSWVHSK(1)FDNPEK	3	-2.5348	34	0.704		0.43				0.438			0.489			2.138	1.423	1.39	1.251	1.337	1.381	1.481	0.972	0.99	0.554	0.644	0.379	0.782	0.736	0.719	0.601	0.603	0.594	0.747	0.75	0.745	0.549	0.548	0.555	1.423	1.454
Capana01g001578	393	K	LOX21_SOLTU Linoleate 13S-lipoxygenase 2-1, chloroplastic OS=Solanum tuberosum GN=LOX2.1 PE=1 SV=1	LOX2.1	1	0.0169123	51.43	DK(1)FSWFR	2	-7.5078	1																	1								0.782	0.736	0.719	0.601	0.603	0.594	0.747	0.75	0.745	0.549	0.548	0.555	1.423	1.454
Capana01g001578	122	K	LOX21_SOLTU Linoleate 13S-lipoxygenase 2-1, chloroplastic OS=Solanum tuberosum GN=LOX2.1 PE=1 SV=1	LOX2.1	0.999948	0.0121554	66.664	TGTEKPNIK(1)AFAHR	3	-4.7563	2													0.959							1.041					0.782	0.736	0.719	0.601	0.603	0.594	0.747	0.75	0.745	0.549	0.548	0.555	1.423	1.454
Capana01g001578	167	K	LOX21_SOLTU Linoleate 13S-lipoxygenase 2-1, chloroplastic OS=Solanum tuberosum GN=LOX2.1 PE=1 SV=1	LOX2.1	1	1.16906e-30	162.23	EMYVK(1)NIVIDGFPHGK	2	1.4281	73	0.554	0.528	0.499	0.489	0.484	0.427	0.528	0.565	0.476	0.437	0.431	0.531	1.282	1.649	1.21	2.404	2.401	1.981	1.842	1.706	1.802	0.657	0.498	0.619	0.782	0.736	0.719	0.601	0.603	0.594	0.747	0.75	0.745	0.549	0.548	0.555	1.423	1.454
Capana01g001578	258	K	LOX21_SOLTU Linoleate 13S-lipoxygenase 2-1, chloroplastic OS=Solanum tuberosum GN=LOX2.1 PE=1 SV=1	LOX2.1	1	4.78572e-11	51.542	IYDYDVYNDLGDPDANDDCK(1)RPVLGGK	3	-1.8632	1															1										0.782	0.736	0.719	0.601	0.603	0.594	0.747	0.75	0.745	0.549	0.548	0.555	1.423	1.454
Capana01g001582	53	K	IDND_VITVI L-idonate 5-dehydrogenase OS=Vitis vinifera GN=VIT_16s0100g00290 PE=1 SV=2	VIT_16s0100g00290	1	5.52686e-11	151.52	AVGICGSDVHYLK(1)TLR	2	-3.1412	19	0.69	0.597	0.886	1.378	1.198	1.073		0.647	0.788	0.431			1.233	1.692	1.408	1.076	1.422	1.483	1.093	0.63	0.78		0.498		1.134	1.162	1.156	1.209	1.203	1.176	1.215	1.241	1.22	0.816	0.829	0.867	1.031	1.036
Capana01g001616	102	K	D-xylose dehydrogenase	---	0.999972	2.53202e-07	89.489	AGK(1)HVLQEKPAAETVEEAEK	3	-5.1166	3					0.858								1.013									1.129			1.027	0.971	0.994	1.06	0.992	1.018	0.75	0.786	0.78	0.7	0.717	0.688	1.137	1.109
Capana01g001616	55	K	D-xylose dehydrogenase	---	1	2.78245e-84	193.94	SAVEVAQK(1)HFPNVVCK	2	-2.1292	19			1.292	1.283	1.251	1.289	0.876	0.628	0.807	0.541	0.721	0.576	0.084	1.442	1.506	1.056	0.962	1.11					1.286	1.291	1.027	0.971	0.994	1.06	0.992	1.018	0.75	0.786	0.78	0.7	0.717	0.688	1.137	1.109
Capana01g001648	317	K	PAP12_ARATH Probable plastid-lipid-associated protein 12, chloroplastic OS=Arabidopsis thaliana GN=PAP12 PE=2 SV=1	PAP12	1	0.00954067	58.916	GYNK(1)ILFVHVR	2	-7.3262	3						0.729																1.166		1.105	0.886	0.899	0.989	0.915	1.029	1.093	1.249	1.167	1.104	0.988	0.942	0.997	0.956	1.011
Capana01g001681	53	K	DFRA_DIACA Dihydroflavonol-4-reductase OS=Dianthus caryophyllus GN=A PE=2 SV=1	A	1	0.0140108	91.032	TDHLTSLDGAK(1)ER	2	-8.1881	6					0.985													0.56					1.089	1.366	1.212	1.139	1.09	1.178	1.237	1.139	0.918	0.893	0.944	0.876	0.778	0.824	1.048	0.974
Capana01g001682	160	K	DFRA_DIACA Dihydroflavonol-4-reductase OS=Dianthus caryophyllus GN=A PE=2 SV=1	A	1	0.0112954	71.066	EK(1)QLWYVLSK	2	-10.79	2	1.473					0.527																			0.91	0.949	1.002	1.17	1.149	1.197	0.923	0.989	0.946	0.861	0.907	0.794	1.061	1.105
Capana01g001700	374	K	SPP1_TOBAC Sucrose-phosphatase 1 OS=Nicotiana tabacum GN=SPP1 PE=2 SV=1	SPP1	1	0.00366878	76.605	K(1)WELCGEER	2	-6.8735	15	0.874	0.861				1.362	1.104	1.335	1.248	1.036			1.138		0.742	1.08	0.811	1.115		0.619		0.825	0.851
Capana01g001716	125	K	protein EMBRYO SAC DEVELOPMENT ARREST 3, chloroplastic-like	---	1	0.000228297	79.235	NCGGSGAIICDMCGGTGK(1)WK	2	23.381	2												1													1.009	0.894	0.848	0.826	0.838	0.801	1.135	1.154	1.213	1.034	1.058	1.06	0.802	0.787
Capana01g001805	237	K	AGO4_ARATH Protein argonaute 4 OS=Arabidopsis thaliana GN=AGO4 PE=1 SV=2	AGO4	1	9.1615e-05	81.409	QSFFHNDPK(1)NFVDVGGGVLGCR	3	-7.1898	4	1.306			0.87	1.168		0.657																		1.18	1.234	1.249	1.137	1.14	1.166	1.088	1.095	1.102	1.071	1	1.048	0.905	0.914
Capana01g001805	434	K	AGO4_ARATH Protein argonaute 4 OS=Arabidopsis thaliana GN=AGO4 PE=1 SV=2	AGO4	1	0.00459687	95.311	INK(1)YDAEPLLR	2	0.19872	14	0.575			1.026	0.872	1.031		1.167			0.604			0.819		1.64	1.577			0.813	0.875				1.18	1.234	1.249	1.137	1.14	1.166	1.088	1.095	1.102	1.071	1	1.048	0.905	0.914
Capana01g001805	221	K	AGO4_ARATH Protein argonaute 4 OS=Arabidopsis thaliana GN=AGO4 PE=1 SV=2	AGO4	1	5.38758e-13	150.53	QHAAK(1)QGCLLVR	2	-10.525	13	1.565			1.863		1.544			0.878	0.538	0.588	0.611		1.144	1.312		1.323			0.758	0.755			0.121	1.18	1.234	1.249	1.137	1.14	1.166	1.088	1.095	1.102	1.071	1	1.048	0.905	0.914
Capana01g001805	311	K	AGO4_ARATH Protein argonaute 4 OS=Arabidopsis thaliana GN=AGO4 PE=1 SV=2	AGO4	1	6.39476e-06	87.895	VK(1)TSPTNQEYK	2	-7.6199	17	1.351	1.322	1.338	1.341	1.243	1.221	0.887		0.88	0.696	0.703			1.018	0.95	0.791		0.724	0.852	0.859	0.823				1.18	1.234	1.249	1.137	1.14	1.166	1.088	1.095	1.102	1.071	1	1.048	0.905	0.914
Capana01g001805	300	K	AGO4_ARATH Protein argonaute 4 OS=Arabidopsis thaliana GN=AGO4 PE=1 SV=2	AGO4	1	0.002205	92.732	DPFSLDWAK(1)AK	2	-8.4165	5	1.566			1.125		0.989			0.665								0.656								1.18	1.234	1.249	1.137	1.14	1.166	1.088	1.095	1.102	1.071	1	1.048	0.905	0.914
Capana01g001805	581	K	AGO4_ARATH Protein argonaute 4 OS=Arabidopsis thaliana GN=AGO4 PE=1 SV=2	AGO4	1	0.00387239	46.447	NCDVYGPWK(1)R	2	-8.4099	1													1												1.18	1.234	1.249	1.137	1.14	1.166	1.088	1.095	1.102	1.071	1	1.048	0.905	0.914
Capana01g001814	278	K	ISPE_SOLLC 4-diphosphocytidyl-2-C-methyl-D-erythritol kinase, chloroplastic/chromoplastic (Fragment) OS=Solanum lycopersicum GN=ISPE PE=1 SV=1	ISPE	1	5.87622e-09	105.94	PQQACSTAEVYK(1)R	2	-6.0761	19	1.101	1.426	1.094	0.994	1.15	1.195	1.043	0.884			0.617		0.997	0.85	1.244		0.899	0.857	1.087	0.787		0.87	0.926	0.977	1.087	0.969	0.954	0.962	0.885	0.863	0.904	0.912	0.962	0.913	0.883	0.881	0.992	0.988
Capana01g001814	185	K	ISPE_SOLLC 4-diphosphocytidyl-2-C-methyl-D-erythritol kinase, chloroplastic/chromoplastic (Fragment) OS=Solanum lycopersicum GN=ISPE PE=1 SV=1	ISPE	1	0.0012601	68.108	TGTDNHFWIHLDK(1)K	3	-8.2819	1																				1					1.087	0.969	0.954	0.962	0.885	0.863	0.904	0.912	0.962	0.913	0.883	0.881	0.992	0.988
Capana01g001814	79	K	ISPE_SOLLC 4-diphosphocytidyl-2-C-methyl-D-erythritol kinase, chloroplastic/chromoplastic (Fragment) OS=Solanum lycopersicum GN=ISPE PE=1 SV=1	ISPE	1	2.9835e-33	145.95	QVEITYNPEEK(1)FNK	2	26.932	10						0.355				0.842	0.742		1.2				1.816	1.084	0.91	0.986	1.065				1.087	0.969	0.954	0.962	0.885	0.863	0.904	0.912	0.962	0.913	0.883	0.881	0.992	0.988
Capana01g001826	363	K	CNX1_ARATH Molybdopterin biosynthesis protein CNX1 OS=Arabidopsis thaliana GN=CNX1 PE=1 SV=2	CNX1	1	0.00534537	47.57	HSVK(1)TDPLRPEFHR	3	-6.1601	4		1.225	1.269													0.783		0.724							1.242	1.189	1.059	1.076	1.044	1.019	1.058	1.041	1.079	0.845	0.865	0.842	1.006	1.035
Capana01g001833	258	K	SRRT_ARATH Serrate RNA effector molecule OS=Arabidopsis thaliana GN=SE PE=1 SV=2	SE	0.999991	0.00515609	68.548	AYFNAHK(1)DEEWFKDK	3	-1.955	7	1.22		1.187	1.038	0.982		0.866		0.882		0.824														1.152	1.035	1.072	0.972	1.058	1.049	0.887	0.946	0.937	1.142	1.112	1.095	1.009	1
Capana01g001833	242	K	SRRT_ARATH Serrate RNA effector molecule OS=Arabidopsis thaliana GN=SE PE=1 SV=2	SE	1	0.0102328	68.49	YQEYK(1)SGYIEAQK	2	-6.0803	11	1.139		1.154	0.798	1.011		1.026							0.827				0.851	1.092		1.102				1.152	1.035	1.072	0.972	1.058	1.049	0.887	0.946	0.937	1.142	1.112	1.095	1.009	1
Capana01g001835	674	K	METE_CATRO 5-methyltetrahydropteroyltriglutamate--homocysteine methyltransferase OS=Catharanthus roseus GN=METE PE=2 SV=1	METE	0.999975	0.00331824	78.157	K(1)YTEVKPALNNMVAAAK	2	-2.6258	6					0.931									1.081		0.988									1.364	1.229	0.965	1.078	0.985	0.694	0.966	1.027	1.125	0.974	0.917	1.022	1.025	1.045
Capana01g001837	67	K	inactive protein RESTRICTED TEV MOVEMENT 2-like	---	1	0.00266391	63.212	ISGQRPIGQNK(1)WQR	3	-2.1821	1																		1
Capana01g001863	88	K	R10A1_ARATH 60S ribosomal protein L10a-1 OS=Arabidopsis thaliana GN=RPL10AA PE=2 SV=1	RPL10AA	1	0.000493628	88.24	EAISVIK(1)NDANEK	2	-9.2512	5	0.639											0.902		1.463	1.193	0.804
Capana01g001868	11	K	NDHJ_TOBAC NAD(P)H-quinone oxidoreductase subunit J, chloroplastic OS=Nicotiana tabacum GN=ndhJ PE=3 SV=1	ndhJ	1	1.22574e-21	147.19	LSAWLVK(1)HGLIHR	3	-6.7601	43	1.092	1.055	0.996	1.829	1.606	1.759	1.172	1.11	1.156	0.428	0.38	0.388	1.517	1.446	1.442	1.091	1.112	0.999	0.402	0.427	0.364	0.706	0.828	0.697
Capana01g001869	96	K	NDHK_ATRBE NAD(P)H-quinone oxidoreductase subunit K, chloroplastic OS=Atropa belladonna GN=ndhK PE=3 SV=2	ndhK	1	2.14668e-07	126.82	CFTTNHK(1)FHVR	3	0.11535	27	1.206	0.956	1.193	1.359	1.23	1.005			0.459		0.709		0.831	1.057	0.994
Capana01g001952	11	K	IF5A4_SOLTU Eukaryotic translation initiation factor 5A-4 OS=Solanum tuberosum GN=EIF5A4 PE=2 SV=1	EIF5A4	1	1.32915e-52	173.26	SDEEHQFESK(1)ADAGASK	2	1.4785	23	0.75	0.751	0.726	0.932	1.054	1.432		0.949	0.955	1.115	1.164	1.278	0.861	0.752	0.844	0.998	0.929	0.681	1.109	0.968	1.201	1.319	1.088	1.145	0.998	0.971	0.96	1.027	1.072	1.053	0.972	0.937	0.961	1.165	1.192	1.205	0.826	0.906
Capana01g001997	127	K	Amidohydro-rel domain-containing protein	---	1	2.7222e-16	164.31	FDHSYVTSALK(1)K	2	-6.665	8	0.718												1.107			0.745		0.84			0.734	1.214	1.312	1.33	0.986	0.897	0.933	0.904	0.874	0.901	0.962	0.98	0.952	0.771	0.806	0.822	1.089	1.078
Capana01g001997	132	K	Amidohydro-rel domain-containing protein	---	1	9.23926e-05	110.91	FPSK(1)FVGCCLANPAK	2	-1.2953	18	1.189		1.157	1.132	1.239	1.157	0.847	0.736	0.852				1.093	1.21	1.201	1.009	1.098	0.934	0.787	0.809	0.755			0.796	0.986	0.897	0.933	0.904	0.874	0.901	0.962	0.98	0.952	0.771	0.806	0.822	1.089	1.078
Capana01g002007	124	K	CP20B_ARATH Peptidyl-prolyl cis-trans isomerase CYP20-2, chloroplastic OS=Arabidopsis thaliana GN=CYP20-2 PE=1 SV=1	CYP20-2	1	1.96326e-08	94.804	ALCTGEK(1)GFGFK	2	-7.2528	23	0.853	0.703	0.785	1.175	1.097	1.198	0.923	1.246	1.163		0.947	1.396	1.305	1.009	1.159	1.063	0.924	0.894	1.014	0.892	0.859	1.141	1.138	0.115	0.578	0.689	0.743	0.891	0.906	0.943	1.115	1.103	1.054	1.25	1.349	1.192	0.933	0.846
Capana01g002007	149	K	CP20B_ARATH Peptidyl-prolyl cis-trans isomerase CYP20-2, chloroplastic OS=Arabidopsis thaliana GN=CYP20-2 PE=1 SV=1	CYP20-2	1	0.00992989	57.62	DFMIQGGDFDK(1)GNGTGGK	2	-0.40117	2																						0.984		1.016	0.578	0.689	0.743	0.891	0.906	0.943	1.115	1.103	1.054	1.25	1.349	1.192	0.933	0.846
Capana01g002007	156	K	CP20B_ARATH Peptidyl-prolyl cis-trans isomerase CYP20-2, chloroplastic OS=Arabidopsis thaliana GN=CYP20-2 PE=1 SV=1	CYP20-2	1	6.19586e-07	106.35	GNGTGGK(1)SIYGR	2	-8.431	8					1.171	0.835				1.268		0.995	0.896										0.888	0.946	0.578	0.689	0.743	0.891	0.906	0.943	1.115	1.103	1.054	1.25	1.349	1.192	0.933	0.846
Capana01g002007	138	K	CP20B_ARATH Peptidyl-prolyl cis-trans isomerase CYP20-2, chloroplastic OS=Arabidopsis thaliana GN=CYP20-2 PE=1 SV=1	CYP20-2	1	2.10116e-33	154.94	VIK(1)DFMIQGGDFDK	2	-5.8799	35	0.539	0.59	0.623	1.065	0.927	0.951	0.87	1.158	0.936	1.047	0.971	1.192	1.238		0.654	0.938	1.069	1.044	0.956	0.927	0.774	1.67	1.478	1.381	0.578	0.689	0.743	0.891	0.906	0.943	1.115	1.103	1.054	1.25	1.349	1.192	0.933	0.846
Capana01g002007	129	K	CP20B_ARATH Peptidyl-prolyl cis-trans isomerase CYP20-2, chloroplastic OS=Arabidopsis thaliana GN=CYP20-2 PE=1 SV=1	CYP20-2	1	2.77136e-08	143.39	GFGFK(1)DSAFHR	2	-3.4217	26	1.008	1.014	1.049	1.258	1.295	1.227	0.934	0.851	0.872	1.084	1.183	1.1	1.076	1.137	1.044	0.887	0.892	0.909	0.85	0.885	0.042	1.107	1.164	1.134	0.578	0.689	0.743	0.891	0.906	0.943	1.115	1.103	1.054	1.25	1.349	1.192	0.933	0.846
Capana01g002025	403	K	RUBB_PEA RuBisCO large subunit-binding protein subunit beta, chloroplastic OS=Pisum sativum PE=1 SV=2	---	1	9.4165e-06	126.63	VAQIK(1)NLIEAAEQDYEKEK	3	-5.991	7	1.334	1.321	0.689		0.955		1.335				0.868	0.498													0.881	0.952	1.005	0.902	0.937	0.987	1.027	1.021	1.027	1.223	1.189	1.185	0.967	0.967
Capana01g002025	503	K	RUBB_PEA RuBisCO large subunit-binding protein subunit beta, chloroplastic OS=Pisum sativum PE=1 SV=2	---	1	0.00581706	58.426	VGADIVK(1)R	2	-3.3663	3							0.827			0.589									1.584						0.881	0.952	1.005	0.902	0.937	0.987	1.027	1.021	1.027	1.223	1.189	1.185	0.967	0.967
Capana01g002025	234	K	RUBB_PEA RuBisCO large subunit-binding protein subunit beta, chloroplastic OS=Pisum sativum PE=1 SV=2	---	1	1.20795e-206	265.34	GVVTLEEGK(1)SAENSLR	2	2.6476	102	1.035	1.017	1.126	1.154	1.113	1.134	1.083	1.15	1.134	1.061	1.053	1.116	0.977	0.956	0.957	1.091	1.052	1.066	1.001	1.037	0.992	0.545	0.583	0.567	0.881	0.952	1.005	0.902	0.937	0.987	1.027	1.021	1.027	1.223	1.189	1.185	0.967	0.967
Capana01g002025	102	K	RUBB_PEA RuBisCO large subunit-binding protein subunit beta, chloroplastic OS=Pisum sativum PE=1 SV=2	---	1	0.00112133	63.908	YGAPK(1)IVNDGVTVAR	2	-12.19	6	1.123	0.9	1.271								0.792										0.891			1.022	0.881	0.952	1.005	0.902	0.937	0.987	1.027	1.021	1.027	1.223	1.189	1.185	0.967	0.967
Capana01g002025	397	K	RUBB_PEA RuBisCO large subunit-binding protein subunit beta, chloroplastic OS=Pisum sativum PE=1 SV=2	---	1	0	293.43	DATTIVGDGSTQEAVNK(1)R	2	2.9985	63	0.738	0.808	0.882	0.866	0.968	0.848	0.861	0.854	0.884	0.979	1.181	1.27	0.884	0.893	0.823	1.097	1.007	1.048	1.299	1.316	1.236	1.135	1.068	1.055	0.881	0.952	1.005	0.902	0.937	0.987	1.027	1.021	1.027	1.223	1.189	1.185	0.967	0.967
Capana01g002025	375	K	RUBB_PEA RuBisCO large subunit-binding protein subunit beta, chloroplastic OS=Pisum sativum PE=1 SV=2	---	1	0.0170517	82.822	ADKEVLGHAAK(1)VVLTK	2	-3.2292	1																					1				0.881	0.952	1.005	0.902	0.937	0.987	1.027	1.021	1.027	1.223	1.189	1.185	0.967	0.967
Capana01g002025	88	K	RUBB_PEA RuBisCO large subunit-binding protein subunit beta, chloroplastic OS=Pisum sativum PE=1 SV=2	---	1	1.89006e-08	112.93	LADLVGVTLGPK(1)GR	2	-9.1494	13				0.456					0.265	1.063	0.554	0.679	1.786		0.91	0.986	0.89		0.716			1.584	1.463	1.65	0.881	0.952	1.005	0.902	0.937	0.987	1.027	1.021	1.027	1.223	1.189	1.185	0.967	0.967
Capana01g002025	186	K	RUBB_PEA RuBisCO large subunit-binding protein subunit beta, chloroplastic OS=Pisum sativum PE=1 SV=2	---	1	6.64295e-06	117.3	ALVDELK(1)NMSK	2	-2.1509	30	0.808	0.51		0.794	0.822	0.982	0.574	1.046	1.398			0.999	1.27			0.953	1.101		1.654		0.697	1.309		1.086	0.881	0.952	1.005	0.902	0.937	0.987	1.027	1.021	1.027	1.223	1.189	1.185	0.967	0.967
Capana01g002025	415	K	RUBB_PEA RuBisCO large subunit-binding protein subunit beta, chloroplastic OS=Pisum sativum PE=1 SV=2	---	1	8.2322e-06	91.245	NLIEAAEQDYEK(1)EK	2	-5.6045	8							0.569	0.829		0.966		0.933						0.856		0.75		1.572	1.524		0.881	0.952	1.005	0.902	0.937	0.987	1.027	1.021	1.027	1.223	1.189	1.185	0.967	0.967
Capana01g002025	62	K	RUBB_PEA RuBisCO large subunit-binding protein subunit beta, chloroplastic OS=Pisum sativum PE=1 SV=2	---	1	0.00142234	71.066	ELYFNK(1)DGSAIK	2	-8.1213	5													0.678						1.48	0.266			0.79	1.786	0.881	0.952	1.005	0.902	0.937	0.987	1.027	1.021	1.027	1.223	1.189	1.185	0.967	0.967
Capana01g002025	515	K	RUBB_PEA RuBisCO large subunit-binding protein subunit beta, chloroplastic OS=Pisum sativum PE=1 SV=2	---	1	6.85197e-85	194.83	LIAK(1)NAGVNGSVVSEK	2	-5.106	104	1.459	1.428	1.469	1.344	1.481	0.26	0.248	0.163	1.019	1.085	1.125	1.2	1.394	1.393	1.372	1.027	1.001	0.982	0.226	1.028	1.021	0.767	0.751	0.757	0.881	0.952	1.005	0.902	0.937	0.987	1.027	1.021	1.027	1.223	1.189	1.185	0.967	0.967
Capana01g002050	458	K	YTHD2_HUMAN YTH domain family protein 2 OS=Homo sapiens GN=YTHDF2 PE=1 SV=2	YTHDF2	1	0.00906587	63.212	SYSEDDVHK(1)SIK	2	-6.4985	2					1.161						0.839														1.27	1.258	1.259	1.019	1.009	1.016	0.671	0.653	0.578	0.88	0.962	0.873	1.012	1.117
Capana01g002050	449	K	YTHD2_HUMAN YTH domain family protein 2 OS=Homo sapiens GN=YTHDF2 PE=1 SV=2	YTHDF2	1	0.000150382	92.445	FFIIK(1)SYSEDDVHK	2	-0.60407	13			1.123	1.077		1.069				0.744		0.708	1.012	1.152	1.107				0.687		0.744	1.278		1.297	1.27	1.258	1.259	1.019	1.009	1.016	0.671	0.653	0.578	0.88	0.962	0.873	1.012	1.117
Capana01g002077	356	K	KPYC_TOBAC Pyruvate kinase, cytosolic isozyme OS=Nicotiana tabacum PE=2 SV=1	---	1	3.71103e-06	116.36	ASHEESTEEALYFALQHAK(1)TK	3	-4.1363	2		0.89			1.11																				1.036	1.164	1.148	1.07	1.087	1.114	1.028	1.095	1.104	0.938	0.923	0.956	1.073	1.027
Capana01g002103	182	K	Putative ATP-dependent RNA helicase A-like	---	1	0.000108407	95.138	PVNSPLSHK(1)HALQK	2	1.05	26	1.314	1.251	1.099	1.113	1.116	1.024	0.938	0.902	1		0.943	0.951		0.96			0.8							0.588	1.075	1.095	1.032	0.855	0.868	0.9	1.059	1.051	1.071	1.178	1.233	1.241	0.865	0.875
Capana01g002147	104	K	PRS8A_ARATH 26S protease regulatory subunit 8 homolog A OS=Arabidopsis thaliana GN=RPT6A PE=2 SV=1	RPT6A	1	1.18236e-07	95.656	VHPEGK(1)YVVDIDK	2	-7.751	11	0.826			0.982	0.86			0.795			1.078	0.707			0.909		1.193	1.014		1.309	1.328				1.078	1.07	1.064	1.068	1.07	1.058	0.969	0.96	0.943	1.048	0.978	1.025	0.963	0.956
Capana01g002147	319	K	PRS8A_ARATH 26S protease regulatory subunit 8 homolog A OS=Arabidopsis thaliana GN=RPT6A PE=2 SV=1	RPT6A	1	0.00483358	91.783	FDILK(1)IHSR	2	-6.0263	4					1.004	1.254			0.822			0.92													1.078	1.07	1.064	1.068	1.07	1.058	0.969	0.96	0.943	1.048	0.978	1.025	0.963	0.956
Capana01g002147	206	K	PRS8A_ARATH 26S protease regulatory subunit 8 homolog A OS=Arabidopsis thaliana GN=RPT6A PE=2 SV=1	RPT6A	1	0.0146871	50.314	GVLLYGPPGTGK(1)TLLAR	2	1.0196	1															1										1.078	1.07	1.064	1.068	1.07	1.058	0.969	0.96	0.943	1.048	0.978	1.025	0.963	0.956
Capana01g002147	232	K	PRS8A_ARATH 26S protease regulatory subunit 8 homolog A OS=Arabidopsis thaliana GN=RPT6A PE=2 SV=1	RPT6A	1	0.000356572	113.34	VSGSELVQK(1)YIGEGSR	2	-0.83145	4										0.987		1.013													1.078	1.07	1.064	1.068	1.07	1.058	0.969	0.96	0.943	1.048	0.978	1.025	0.963	0.956
Capana01g002185	85	K	TBP_SOLTU TATA-box-binding protein OS=Solanum tuberosum GN=TBP PE=2 SV=1	TBP	1	0.0117308	79.889	MVCTGAK(1)SEQQSK	2	-5.5012	1						1
Capana01g002187	122	K	RS92_ARATH 40S ribosomal protein S9-2 OS=Arabidopsis thaliana GN=RPS9C PE=2 SV=1	RPS9C	1	0.00283756	65.404	TGMAK(1)SIHHAR	2	-7.3718	6				1.299							0.871				1.226				0.89	1.11		0.604			1.011	1.101	1.176	1.183	1.189	1.218	0.983	0.92	0.961	0.95	0.948	0.971	1.151	1.133
Capana01g002192	13	K	VDAC2_SOLTU Mitochondrial outer membrane protein porin of 36 kDa OS=Solanum tuberosum PE=1 SV=2	---	1	0.0165299	59.645	GPGLYSDIGK(1)K	2	-5.9701	3																						0.907	1.088	1.005	0.876	0.869	0.849	0.88	0.858	0.851	0.977	0.94	0.951	1.039	1.077	1.068	0.928	0.93
Capana01g002192	236	K	VDAC2_SOLTU Mitochondrial outer membrane protein porin of 36 kDa OS=Solanum tuberosum PE=1 SV=2	---	1	7.35175e-06	109.47	VNSYGK(1)ASALIQHEWRPK	3	-6.0648	6									0.641										0.773		0.761	1.267	1.31	1.247	0.876	0.869	0.849	0.88	0.858	0.851	0.977	0.94	0.951	1.039	1.077	1.068	0.928	0.93
Capana01g002238	144	K	RR3_TOBAC 30S ribosomal protein S3, chloroplastic OS=Nicotiana tabacum GN=rps3 PE=3 SV=1	rps3	1	0.0105682	50.09	AK(1)IDYCSYTVR	2	-8.0219	4		1.149			1.682	0.09				1.079
Capana01g002258	86	K	GALK1_ARATH Galactokinase OS=Arabidopsis thaliana GN=GAL1 PE=1 SV=2	GAL1	1	0.000154302	102.03	QDTIVAIWK(1)HDSNEPDK	2	3.0909	17				0.837	1.164	1.068					1.145	0.845		1.632	1.219	0.849		0.87		0.979	1.014			0.379	1.233	1.16	1.049	1.117	1.115	1.022	1.153	1.153	1.153	0.654	0.735	0.619	1.094	1.161
Capana01g002263	499	K	AEE7_ARATH Acetate/butyrate--CoA ligase AAE7, peroxisomal OS=Arabidopsis thaliana GN=AAE7 PE=1 SV=1	AAE7	1	0.0124328	69.093	IQK(1)HLLR	2	-1.8529	8	0.726		0.928			1.402	1.348	1.168			0.882						0.933			0.613					1.127	1.001	1.153	1.05	1.056	1.112	1.359	1.391	1.392	0.958	0.958	0.918	0.957	0.96
Capana01g002263	491	K	AEE7_ARATH Acetate/butyrate--CoA ligase AAE7, peroxisomal OS=Arabidopsis thaliana GN=AAE7 PE=1 SV=1	AAE7	1	0.0198244	51.454	SVFFGPLPK(1)TATGK	2	-9.6649	1													1												1.127	1.001	1.153	1.05	1.056	1.112	1.359	1.391	1.392	0.958	0.958	0.918	0.957	0.96
Capana01g002299	73	K	P4R3B_MOUSE Serine/threonine-protein phosphatase 4 regulatory subunit 3B OS=Mus musculus GN=Smek2 PE=2 SV=2	Smek2	1	0.00678485	43.613	VK(1)YEQSLEDSGIR	2	-12.748	1																					1
Capana01g002320	590	K	ACLB1_ORYSJ ATP-citrate synthase beta chain protein 1 OS=Oryza sativa subsp. japonica GN=ACLB-1 PE=2 SV=1	ACLB-1	1	9.93307e-05	125.17	SIGLIGHTFDQK(1)R	2	0.33386	19	1.272	0.943	1.265	0.881	1.041	0.977							0.916	1.011	1.037	0.756	0.743		0.918	0.805	0.982	1.241	1.213		0.983	0.958	0.992	1.046	1.056	1.032	0.935	0.909	0.916	0.954	0.936	0.942	0.999	1.05
Capana01g002320	175	K	ACLB1_ORYSJ ATP-citrate synthase beta chain protein 1 OS=Oryza sativa subsp. japonica GN=ACLB-1 PE=2 SV=1	ACLB-1	1	3.2869e-90	159.44	LYRPGSVGFVSK(1)SGGMSNELYNTIAR	3	-7.3999	37	0.893	1.048	1.108	1.18	1.173	1.361	1.468	1.432	1.235	1.029	0.927	0.94	1.218	1.118	1.135	0.893	0.896	0.859	0.882	0.811	0.746	0.339		0.31	0.983	0.958	0.992	1.046	1.056	1.032	0.935	0.909	0.916	0.954	0.936	0.942	0.999	1.05
Capana01g002320	19	K	ACLB1_ORYSJ ATP-citrate synthase beta chain protein 1 OS=Oryza sativa subsp. japonica GN=ACLB-1 PE=2 SV=1	ACLB-1	1	4.04822e-257	240.33	TTQALFYNYK(1)QLPIQR	2	3.797	42	0.572		0.242	0.485		0.201	0.665	0.504	0.543	0.885	0.608	0.493	1.61	0.798	0.628	1.688	1.843	1.344	1.285	1.096	0.813	2.181	1.621	1.897	0.983	0.958	0.992	1.046	1.056	1.032	0.935	0.909	0.916	0.954	0.936	0.942	0.999	1.05
Capana01g002320	288	K	ACLB1_ORYSJ ATP-citrate synthase beta chain protein 1 OS=Oryza sativa subsp. japonica GN=ACLB-1 PE=2 SV=1	ACLB-1	1	1.28607e-96	216.04	SGGEMESAQAK(1)NQALR	2	-6.7544	21	1.086	1.282	1.196	1.311	1.405	1.384	0.657		0.79	0.579	0.813	0.86	1.261	1.281	1.487	0.829	1.06	0.741	0.86	0.657		0.681	0.779		0.983	0.958	0.992	1.046	1.056	1.032	0.935	0.909	0.916	0.954	0.936	0.942	0.999	1.05
Capana01g002320	277	K	ACLB1_ORYSJ ATP-citrate synthase beta chain protein 1 OS=Oryza sativa subsp. japonica GN=ACLB-1 PE=2 SV=1	ACLB-1	1	9.72139e-05	85.421	SEVQFGHAGAK(1)SGGEMESAQAK	3	-5.2097	5									0.899				1.322	1.036			0.878		0.865						0.983	0.958	0.992	1.046	1.056	1.032	0.935	0.909	0.916	0.954	0.936	0.942	0.999	1.05
Capana01g002363	421	K	TPR_REGION domain-containing protein	---	1	0.000745169	63.212	ASCYK(1)EIGEYK	2	-5.7856	5		0.974				1.308						0.862	1.659		0.197										1.255	1.069	1.072	1.062	1.143	0.788	0.892	1.005	0.831	1.162	0.974	0.846	1.195	1.097
Capana01g002397	59	K	RR1_SPIOL 30S ribosomal protein S1, chloroplastic OS=Spinacia oleracea GN=RPS1 PE=1 SV=1	RPS1	1	8.92089e-05	81.799	LK(1)EIFEDAYER	2	-9.6018	20	0.827	1.205	0.979	1.033	1.401	1.25	0.794	0.865	0.721	1.081	0.932	1.103	1.299	0.873		0.978		0.966	0.963		1.02	0.781	0.929		0.845	0.838	0.932	0.806	0.86	0.875	1.226	1.163	1.199	1.155	1.153	1.127	0.964	0.978
Capana01g002397	136	K	RR1_SPIOL 30S ribosomal protein S1, chloroplastic OS=Spinacia oleracea GN=RPS1 PE=1 SV=1	RPS1	1	0.000261303	52.662	EASLHTIK(1)HVEEAGIFPGLR	3	-7.9293	2	0.985														1.015										0.845	0.838	0.932	0.806	0.86	0.875	1.226	1.163	1.199	1.155	1.153	1.127	0.964	0.978
Capana01g002397	100	K	RR1_SPIOL 30S ribosomal protein S1, chloroplastic OS=Spinacia oleracea GN=RPS1 PE=1 SV=1	RPS1	1	4.35104e-07	115.41	YDFDSEVGTK(1)VK	2	-5.9393	17			0.85				1.067	1.301	1.3	1.147	1.03	0.772	1.18		1.177	0.888	0.926	0.96	1.108	0.49	1.034		0.877	0.892	0.845	0.838	0.932	0.806	0.86	0.875	1.226	1.163	1.199	1.155	1.153	1.127	0.964	0.978
Capana01g002398	116	K	CB5_ARATH Chlorophyll a-b binding protein CP26, chloroplastic OS=Arabidopsis thaliana GN=LHCB5 PE=2 SV=1	LHCB5	1	1.37176e-154	309.98	PEDFAK(1)YQAYELIHAR	3	-3.5401	113	1.051	1.033	1.004	1.043	1.032	0.937	1.012	0.932	0.908	0.97	1.061	1.027	0.921	0.957	0.952	0.792	0.792	0.76	0.662	0.863	0.744	1.628	1.36	1.558	0.952	0.907	0.872	0.803	0.94	0.841	1.016	1.018	1.037	0.963	0.989	0.96	0.888	0.876
Capana01g002398	229	K	CB5_ARATH Chlorophyll a-b binding protein CP26, chloroplastic OS=Arabidopsis thaliana GN=LHCB5 PE=2 SV=1	LHCB5	1	1.65299e-07	151.22	DPDQAAILK(1)VK	2	-7.5323	23	0.466	0.412	0.424	0.561	0.495	0.953	1.056	1.115	1.287		0.926	0.996	1.307	0.832	0.799	1.151	0.674	0.955	0.838	0.82	0.364	1.927	2.231	2.411	0.952	0.907	0.872	0.803	0.94	0.841	1.016	1.018	1.037	0.963	0.989	0.96	0.888	0.876
Capana01g002398	68	K	CB5_ARATH Chlorophyll a-b binding protein CP26, chloroplastic OS=Arabidopsis thaliana GN=LHCB5 PE=2 SV=1	LHCB5	1	7.3127e-27	126.63	AAAASPLDDELAK(1)WYGPDRR	3	-8.0628	16	1.432			0.837	0.902			1.582	1.379	1.018	0.51		1.07		0.532		0.557	0.437	0.545	0.561		1.55	1.483	1.605	0.952	0.907	0.872	0.803	0.94	0.841	1.016	1.018	1.037	0.963	0.989	0.96	0.888	0.876
Capana01g002411	237	K	RL7A2_ARATH 60S ribosomal protein L7a-2 OS=Arabidopsis thaliana GN=RPL7AB PE=1 SV=1	RPL7AB	1	2.02234e-06	121.8	WGGGIMGSK(1)SQAR	2	-7.9338	18	0.698	0.882	0.816	0.685		0.655	0.992		1.002	0.907		0.835	0.726		0.774	1.284	1.241	1.316	1.406	1.289	1.492				1.121	1.049	1.001	1.018	0.961	1.025	1.148	1.215	1.188	0.959	1.054	1.003	0.898	0.785
Capana01g002411	221	K	RL7A2_ARATH 60S ribosomal protein L7a-2 OS=Arabidopsis thaliana GN=RPL7AB PE=1 SV=1	RPL7AB	1	1.6851e-39	191.25	ANFNDK(1)YEENR	2	0.30037	46	1.16	1.171	1.098	1.116	1.161	1.095	1.165	1.23	1.166	0.904	0.824	0.889	1.119	1.058	1.07	1.056	1.012	0.992	1.188	1.151	1.267	0.382	0.353	0.376	1.121	1.049	1.001	1.018	0.961	1.025	1.148	1.215	1.188	0.959	1.054	1.003	0.898	0.785
Capana01g002411	204	K	RL7A2_ARATH 60S ribosomal protein L7a-2 OS=Arabidopsis thaliana GN=RPL7AB PE=1 SV=1	RPL7AB	1	0.00462513	88.181	NEDK(1)MEFSR	2	-8.8007	5							1.141	1.05	1.094				0.733				0.982								1.121	1.049	1.001	1.018	0.961	1.025	1.148	1.215	1.188	0.959	1.054	1.003	0.898	0.785
Capana01g002411	94	K	RL7A2_ARATH 60S ribosomal protein L7a-2 OS=Arabidopsis thaliana GN=RPL7AB PE=1 SV=1	RPL7AB	1	0.00337749	127.94	MLLK(1)YRPEDK	2	-5.8835	12	1.15	0.94			1.215	1.145		0.91	0.945	0.634					0.903			0.939	0.976	1.198	1.045				1.121	1.049	1.001	1.018	0.961	1.025	1.148	1.215	1.188	0.959	1.054	1.003	0.898	0.785
Capana01g002411	129	K	RL7A2_ARATH 60S ribosomal protein L7a-2 OS=Arabidopsis thaliana GN=RPL7AB PE=1 SV=1	RPL7AB	1	0.00412442	103.8	KPIIVK(1)YGLK	2	-6.867	6	1.027	1.04				1.035			1.07									0.794	1.034						1.121	1.049	1.001	1.018	0.961	1.025	1.148	1.215	1.188	0.959	1.054	1.003	0.898	0.785
Capana01g002411	78	K	RL7A2_ARATH 60S ribosomal protein L7a-2 OS=Arabidopsis thaliana GN=RPL7AB PE=1 SV=1	RPL7AB	1	0.00340502	59.731	VPPALNQFTK(1)TLDK	2	-6.901	8	1.008							1.039	1.361				0.844						0.748						1.121	1.049	1.001	1.018	0.961	1.025	1.148	1.215	1.188	0.959	1.054	1.003	0.898	0.785
Capana01g002411	200	K	RL7A2_ARATH 60S ribosomal protein L7a-2 OS=Arabidopsis thaliana GN=RPL7AB PE=1 SV=1	RPL7AB	1	7.52512e-126	216.04	TASALCLTTVK(1)NEDK	2	0.10578	34	0.939	1.156	1.045	1.195	1.294	1.322	1.084	1.229	1.226	0.913	0.722	1.014		0.962	0.833	0.977	0.985	1.079	1.32	0.864	1.264		0.29	0.287	1.121	1.049	1.001	1.018	0.961	1.025	1.148	1.215	1.188	0.959	1.054	1.003	0.898	0.785
Capana01g002411	133	K	RL7A2_ARATH 60S ribosomal protein L7a-2 OS=Arabidopsis thaliana GN=RPL7AB PE=1 SV=1	RPL7AB	1	2.60696e-133	236.34	YGLK(1)HITYLIEQNK	2	-5.89	31	1.031	1.155	1.185	0.978	1.252			0.82	0.827	0.78	1.065	1.111	1.066		1.153	0.942	0.997	1.092	1.309		1.417	0.577	0.639	0.603	1.121	1.049	1.001	1.018	0.961	1.025	1.148	1.215	1.188	0.959	1.054	1.003	0.898	0.785
Capana01g002433	75	K	Putative transmembrane protein 41B-like	---	1	6.62085e-87	148.22	LLK(1)NDDESDSGSGDTGNDAIK	2	3.8728	16	1.331	1.257		1.547	1.311	1.23	0.347	0.457		0.635	0.602	0.86	1.073	1.178	1.182	1.019	1.004	0.967
Capana01g002433	61	K	Putative transmembrane protein 41B-like	---	1	0.0146047	54.436	QQTLLK(1)TPNK	2	-5.0806	1																1
Capana01g002460	492	K	ODB2_HUMAN Lipoamide acyltransferase component of branched-chain alpha-keto acid dehydrogenase complex, mitochondrial OS=Homo sapiens GN=DBT PE=1 SV=3	DBT	1	2.66358e-41	181.44	K(1)FVEKPDLLLLHTR	3	-8.9959	24	1.198	1.032	1.12	1.392	1.211	1.331	1.064	0.873	0.894	0.676	0.863	0.745	1.236	1.221	1.286	0.889	0.84	0.83	0.792	0.996	0.829	0.874	0.84	0.968	1.058	0.997	0.954	0.938	1.021	0.973	1.007	1.027	1.062	0.894	0.908	0.905	1.011	1.047
Capana01g002514	81	K	IF2G_CHICK Eukaryotic translation initiation factor 2 subunit 3 OS=Gallus gallus GN=EIF2S3 PE=1 SV=1	EIF2S3	1	0.0137709	58.426	IYK(1)CEEER	2	-5.6452	1															1										1.167	1.085	1.123	1.216	1.198	1.192	1.032	1.013	1.068	0.876	0.873	0.88	1.047	1.05
Capana01g002514	183	K	IF2G_CHICK Eukaryotic translation initiation factor 2 subunit 3 OS=Gallus gallus GN=EIF2S3 PE=1 SV=1	EIF2S3	1	8.68681e-11	67.057	LQHIIILQNK(1)VDLVQENVAINQHEAIQK	4	-2.7358	3	1.373	0.836						0.791																	1.167	1.085	1.123	1.216	1.198	1.192	1.032	1.013	1.068	0.876	0.873	0.88	1.047	1.05
Capana01g002514	94	K	IF2G_CHICK Eukaryotic translation initiation factor 2 subunit 3 OS=Gallus gallus GN=EIF2S3 PE=1 SV=1	EIF2S3	1	0.000203792	92.732	PMCYK(1)AYGSGK	2	-6.9389	5	0.849			1.11	1.014	0.996								1.031											1.167	1.085	1.123	1.216	1.198	1.192	1.032	1.013	1.068	0.876	0.873	0.88	1.047	1.05
Capana01g002562	68	K	SUGP1_ARATH SURP and G-patch domain-containing protein 1-like protein OS=Arabidopsis thaliana GN=At3g52120 PE=2 SV=1	At3g52120	1	0.00996977	45.183	ANASGK(1)TATVASGGK	2	-8.1909	1																			1
Capana01g002586	215	K	TL19_ARATH Thylakoid lumenal 19 kDa protein, chloroplastic OS=Arabidopsis thaliana GN=At3g63540 PE=1 SV=2	At3g63540	1	4.73918e-184	249.45	NK(1)LYAHFVNAPVPEWK	3	-0.35667	39	1.19	1.034	1.213	1.312	1.405	1.273	0.958	0.808	1.073	1.078	1.349	1.225	0.901	1.034	1.112	0.543	0.571	0.611	0.78	0.874	0.833	0.936	0.95	0.936	0.859	0.921	0.914	0.91	0.891	0.927	1.084	1.112	1.052	1.333	1.269	1.29	0.785	0.777
Capana01g002586	136	K	TL19_ARATH Thylakoid lumenal 19 kDa protein, chloroplastic OS=Arabidopsis thaliana GN=At3g63540 PE=1 SV=2	At3g63540	1	3.01555e-07	140.57	GTNGTDSEFYNPK(1)K	2	1.6731	26	0.717		0.865		0.695	0.605	0.961	0.87	0.935	1.286	1.055	1.366			1.183	0.613	0.608	0.58	0.827	0.863	0.959	1.607	1.792	1.611	0.859	0.921	0.914	0.91	0.891	0.927	1.084	1.112	1.052	1.333	1.269	1.29	0.785	0.777
Capana01g002586	229	K	TL19_ARATH Thylakoid lumenal 19 kDa protein, chloroplastic OS=Arabidopsis thaliana GN=At3g63540 PE=1 SV=2	At3g63540	1	0.00515077	58.476	LYAHFVNAPVPEWK(1)K	2	3.5037	1																							1		0.859	0.921	0.914	0.91	0.891	0.927	1.084	1.112	1.052	1.333	1.269	1.29	0.785	0.777
Capana01g002586	114	K	TL19_ARATH Thylakoid lumenal 19 kDa protein, chloroplastic OS=Arabidopsis thaliana GN=At3g63540 PE=1 SV=2	At3g63540	1	0.000847184	88.734	ASAEYIYDVPNGWK(1)ER	2	20.606	13					0.828	0.712			1.409	1.617	1.378		0.663			0.266	0.66	0.901						1.565	0.859	0.921	0.914	0.91	0.891	0.927	1.084	1.112	1.052	1.333	1.269	1.29	0.785	0.777
Capana01g002599	147	K	ATPO_IPOBA ATP synthase subunit O, mitochondrial OS=Ipomoea batatas PE=1 SV=1	---	1	0.000504608	138.55	HIDAIAK(1)R	2	-3.7195	17		0.454		0.766	0.652	0.601	0.852	0.912	0.987			0.815	0.807	0.749	0.562				0.997	0.871	0.807	2.238	2.057	1.874	0.551	0.729	0.781	0.74	0.802	0.85	1.017	0.992	0.956	1.165	1.171	1.178	0.893	0.921
Capana01g002599	157	K	ATPO_IPOBA ATP synthase subunit O, mitochondrial OS=Ipomoea batatas PE=1 SV=1	---	1	3.45054e-06	128.57	FAELTMAHK(1)GELK	2	-4.8495	24	0.881	0.806	0.876	0.933	0.892	0.936	0.866	0.799	0.853	0.919	1.015	0.95	0.921	0.775	0.892	0.885	0.847	0.797	0.995	1.119	1.12	1.627	1.629	1.667	0.551	0.729	0.781	0.74	0.802	0.85	1.017	0.992	0.956	1.165	1.171	1.178	0.893	0.921
Capana01g002599	100	K	ATPO_IPOBA ATP synthase subunit O, mitochondrial OS=Ipomoea batatas PE=1 SV=1	---	1	0.000220318	115.05	FSQFMK(1)DLSVPTETR	2	2.9879	39		0.711	0.61		0.927	0.99	1.053	1.26	1.162	1.546	1.034		1.222	0.815	0.291	0.269	1.269	1.401	1.181		1.01	1.172	1.077		0.551	0.729	0.781	0.74	0.802	0.85	1.017	0.992	0.956	1.165	1.171	1.178	0.893	0.921
Capana01g002599	140	K	ATPO_IPOBA ATP synthase subunit O, mitochondrial OS=Ipomoea batatas PE=1 SV=1	---	1	0.00382772	99.855	LK(1)HIDAIAK	2	-4.8122	15		0.662		0.633	0.691	0.663		0.668	0.699	1.093	1.017		0.756			0.668			0.706		0.897	1.882	2.019	1.946	0.551	0.729	0.781	0.74	0.802	0.85	1.017	0.992	0.956	1.165	1.171	1.178	0.893	0.921
Capana01g002599	121	K	ATPO_IPOBA ATP synthase subunit O, mitochondrial OS=Ipomoea batatas PE=1 SV=1	---	1	2.07784e-40	165.09	AMTDISSQAK(1)FGDLTK	2	-3.9637	65	0.737	0.88	0.878	0.913	0.918	0.934	1.063	1.052	1.125	0.876	1.067	1.094	1.066		1.008	0.965	0.938	0.883	1.045	1.071	1.023	1.249		1.213	0.551	0.729	0.781	0.74	0.802	0.85	1.017	0.992	0.956	1.165	1.171	1.178	0.893	0.921
Capana01g002602	67	K	RL6_MESCR 60S ribosomal protein L6 OS=Mesembryanthemum crystallinum GN=RPL6 PE=2 SV=1	RPL6	1	0.00497709	60	FYPADDVAK(1)PLINK	2	-6.6511	1										1
Capana01g002602	72	K	RL6_MESCR 60S ribosomal protein L6 OS=Mesembryanthemum crystallinum GN=RPL6 PE=2 SV=1	RPL6	0.999087	0.00509331	90.142	PLINK(0.999)HK(0.001)PKPTK	3	-2.1829	3	1.112				0.939	0.949
Capana01g002623	323	K	CCD1_PHAVU Carotenoid 9,10(9',10')-cleavage dioxygenase 1 OS=Phaseolus vulgaris GN=CCD1 PE=1 SV=1	CCD1	1	0.00732937	100.84	YAK(1)NESLIK	2	-6.2853	3						1.107	0.844						1.049												1.167	1.072	1.033	0.991	0.99	0.903	1.244	1.27	1.319	0.849	0.898	0.879	1.014	1.006
Capana01g002623	195	K	CCD1_PHAVU Carotenoid 9,10(9',10')-cleavage dioxygenase 1 OS=Phaseolus vulgaris GN=CCD1 PE=1 SV=1	CCD1	1	0.00154039	65.879	LLALHEGDK(1)PYVVK	2	-4.7527	4									1.174										0.663	1.029	1.135				1.167	1.072	1.033	0.991	0.99	0.903	1.244	1.27	1.319	0.849	0.898	0.879	1.014	1.006
Capana01g002634	92	K	FTRV_MAIZE Ferredoxin-thioredoxin reductase, variable chain OS=Zea mays PE=1 SV=1	---	1	0.000138972	76.255	VYHVPK(1)VPELDLNGR	2	-2.4115	10															0.51				0.576	0.86	0.762	1.403	1.449	1.44	0.833	0.834	0.899	0.852	0.814	0.854	1.074	1.061	1.087	1.172	1.177	1.146	0.886	0.92
Capana01g002634	106	K	FTRV_MAIZE Ferredoxin-thioredoxin reductase, variable chain OS=Zea mays PE=1 SV=1	---	1	4.0993e-16	153.33	IGTLK(1)QYVAIYK	2	-8.1924	20	0.622	0.697	0.701		0.733	0.847	0.813	0.813	0.762	1.125	1.2	1.285	0.718	0.884	0.862	0.76	0.832			1.077		1.772	1.767	1.73	0.833	0.834	0.899	0.852	0.814	0.854	1.074	1.061	1.087	1.172	1.177	1.146	0.886	0.92
Capana01g002678	274	K	RK1_ARATH 50S ribosomal protein L1, chloroplastic OS=Arabidopsis thaliana GN=RPL1 PE=1 SV=1	RPL1	1	5.66815e-32	154.94	ADK(1)TGIVHLPFGK	2	-6.685	30	0.901	0.974	0.964	0.999	1.001	0.955	0.949	0.732	0.894	0.945	1.129	1.209	0.829	0.983	1.041	0.953	0.908	0.901	0.867	0.948	1.021	1.339	1.268	1.289	0.852	0.844	0.879	0.928	0.939	0.908	1.033	0.974	1.02	1.232	1.227	1.253	0.882	0.872
Capana01g002678	120	K	RK1_ARATH 50S ribosomal protein L1, chloroplastic OS=Arabidopsis thaliana GN=RPL1 PE=1 SV=1	RPL1	1	0.000855551	78.178	FLEIQK(1)LR	2	-7.1762	11								0.614	0.804	1.19		0.643				0.651	0.723	0.766	1.192		0.61	1.941		1.867	0.852	0.844	0.879	0.928	0.939	0.908	1.033	0.974	1.02	1.232	1.227	1.253	0.882	0.872
Capana01g002678	317	K	RK1_ARATH 50S ribosomal protein L1, chloroplastic OS=Arabidopsis thaliana GN=RPL1 PE=1 SV=1	RPL1	1	3.07761e-41	175.43	GVYWK(1)SAHVCSSMGPSIR	2	-2.2383	32	0.792	1.246	1.448	1.48	1.365	1.448	0.946	0.595	0.681	0.714	1.242		1.165	1.446	1.452	0.813	0.857	0.831	0.733		0.847	0.629	0.747	0.521	0.852	0.844	0.879	0.928	0.939	0.908	1.033	0.974	1.02	1.232	1.227	1.253	0.882	0.872
Capana01g002678	312	K	RK1_ARATH 50S ribosomal protein L1, chloroplastic OS=Arabidopsis thaliana GN=RPL1 PE=1 SV=1	RPL1	0.999998	4.11268e-14	124.24	SVEANKPSGAK(1)GVYWK	2	-2.9428	7	0.701	1.117	1.112			0.937				0.879					1.081							1.172			0.852	0.844	0.879	0.928	0.939	0.908	1.033	0.974	1.02	1.232	1.227	1.253	0.882	0.872
Capana01g002678	144	K	RK1_ARATH 50S ribosomal protein L1, chloroplastic OS=Arabidopsis thaliana GN=RPL1 PE=1 SV=1	RPL1	1	2.057e-74	206.7	QTASSK(1)FVETAEAHFR	2	4.2321	67	0.444	0.523	0.544	0.644	0.68	0.896	0.766	0.631	0.738		1.205	0.952	0.999	1.272	1.211	0.895	0.832	1.005	1.295	1.139	1.113	1.555	1.876	1.786	0.852	0.844	0.879	0.928	0.939	0.908	1.033	0.974	1.02	1.232	1.227	1.253	0.882	0.872
Capana01g002678	264	K	RK1_ARATH 50S ribosomal protein L1, chloroplastic OS=Arabidopsis thaliana GN=RPL1 PE=1 SV=1	RPL1	1	0.00697769	103.76	AGTVTSNIPQAIEEFK(1)K	2	5.5341	5																0.974		0.879				1.128	1.019		0.852	0.844	0.879	0.928	0.939	0.908	1.033	0.974	1.02	1.232	1.227	1.253	0.882	0.872
Capana01g002678	160	K	RK1_ARATH 50S ribosomal protein L1, chloroplastic OS=Arabidopsis thaliana GN=RPL1 PE=1 SV=1	RPL1	1	7.80634e-21	156.57	LNIDPK(1)YNDQQLR	2	15.603	28	1.116	1.248	1.22	1.057				0.955	1.182		1.17	1.103	1.14	1.054		0.865	0.681	0.754		0.815	0.125	1.186	1.214	1.116	0.852	0.844	0.879	0.928	0.939	0.908	1.033	0.974	1.02	1.232	1.227	1.253	0.882	0.872
Capana01g002681	135	K	protein RETICULATA-RELATED 4, chloroplastic-like	---	1	0.00270323	51.872	FLELEK(1)SSVLR	2	-10.588	1							1																		0.69	0.805	0.914	1.075	1.113	1.123	1.136	1.018	1.002	0.848	0.806	0.821	1.02	1.063
Capana01g002684	99	K	NAA11_MOUSE N-alpha-acetyltransferase 11 OS=Mus musculus GN=Naa11 PE=2 SV=1	Naa11	1	0.000291764	69.224	IHDMEAK(1)YYADGEDAYDMR	3	-6.7027	6				1.268	1.044			1.097	1.196							0.844							0.551		1.399	1.192	1.319	1.344	1.266	1.448		0.669	0.672	0.534	0.594		0.983	0.98
Capana01g002705	1095	K	SC31A_CHICK Protein transport protein Sec31A OS=Gallus gallus GN=SEC31A PE=2 SV=1	SEC31A	1	4.77884e-09	115.04	LNCGDISK(1)NAAEK	2	-6.753	16	1.178	1.337	1.171	1.386	1.44			0.968		0.691	0.647		1.185	1.213	1.265			0.483	0.759		0.882		0.655	0.741	1.195	1.14	1.17	1.184	1.116	1.151	1.071	1.049	1.083	0.892	0.877	0.893	1.027	1.031
Capana01g002705	429	K	SC31A_CHICK Protein transport protein Sec31A OS=Gallus gallus GN=SEC31A PE=2 SV=1	SEC31A	1	1.59239e-07	97.277	K(1)FQESESSGER	2	-6.1519	21	1.112	1.184	1.131	1.329	1.537	1.533	0.93	0.917	0.881	0.758	0.798	0.824	1.124	1.083	1.307	0.724	0.813	0.65	0.819	0.756	0.79				1.195	1.14	1.17	1.184	1.116	1.151	1.071	1.049	1.083	0.892	0.877	0.893	1.027	1.031
Capana01g002717	504	K	UBP24_ARATH Ubiquitin carboxyl-terminal hydrolase 24 OS=Arabidopsis thaliana GN=UBP24 PE=1 SV=1	UBP24	1	0.0201399	41.025	HQSGK(1)WLR	2	-6.3551	1					1																				1.302	0.805	1.068	1.525	1.224	1.202	0.541	0.935	0.917	0.759	0.808	0.465	0.746	0.9
Capana01g002750	209	K	TBCA_ARATH Tubulin-specific chaperone A OS=Arabidopsis thaliana GN=At2g30410 PE=1 SV=2	At2g30410	1	0.0191134	51.864	MMVPDCHK(1)R	2	-6.1378	2						1.172						0.828													0.987	0.997	0.773	1.122	1.067	0.967	1.079	0.901	0.916	1.401	1.335	1.253	1.111	0.387
Capana01g002806	572	K	LACS1_ARATH Long chain acyl-CoA synthetase 1 OS=Arabidopsis thaliana GN=LACS1 PE=2 SV=1	LACS1	1	0.0148421	70.195	SMLVAVVVPHEGNIK(1)K	2	2.982	2																		0.893	1.107						1.124	1.165	1.123	1.108	1.025	1.059	0.937	0.915	1.062	0.85	0.911	0.927	1.114	1.14
Capana01g002806	173	K	LACS1_ARATH Long chain acyl-CoA synthetase 1 OS=Arabidopsis thaliana GN=LACS1 PE=2 SV=1	LACS1	1	7.84375e-13	122.51	ELLNSECTHAK(1)R	2	-7.8102	20	1.32	1.216	1.252	1.146	1.026	1.367	0.777	0.834	0.959	0.668		0.594		1.263	1.276	1.056	0.843		1.141	0.894	1.126	0.598		0.645	1.124	1.165	1.123	1.108	1.025	1.059	0.937	0.915	1.062	0.85	0.911	0.927	1.114	1.14
Capana01g002806	485	K	LACS1_ARATH Long chain acyl-CoA synthetase 1 OS=Arabidopsis thaliana GN=LACS1 PE=2 SV=1	LACS1	0.942718	0.00478999	78.043	TTFAGYYK(0.943)K(0.057)PELTR	2	-4.0649	1														1											1.124	1.165	1.123	1.108	1.025	1.059	0.937	0.915	1.062	0.85	0.911	0.927	1.114	1.14
Capana01g002806	649	K	LACS1_ARATH Long chain acyl-CoA synthetase 1 OS=Arabidopsis thaliana GN=LACS1 PE=2 SV=1	LACS1	1	0.000211164	64.064	YK(1)VDIVDLYQR	2	-10.981	5								0.914					1.441	0.844	0.9		0.9								1.124	1.165	1.123	1.108	1.025	1.059	0.937	0.915	1.062	0.85	0.911	0.927	1.114	1.14
Capana01g002810	440	K	DMAP1_HUMAN DNA methyltransferase 1-associated protein 1 OS=Homo sapiens GN=DMAP1 PE=1 SV=1	DMAP1	1	1.14373e-11	125.17	SSEVPSSPAQSK(1)R	2	-7.4574	22	0.633	0.682	0.715		0.78		1.174	1.185	1.066	1.2	1.117	1.113	0.612	0.65	0.678	1.055	1.055	0.945	1.32	1.236	1.45	1.156	1.04	1.138
Capana01g002857	426	K	CEFD_STRCL Isopenicillin N epimerase OS=Streptomyces clavuligerus GN=cefD PE=1 SV=3	cefD	1	2.04528e-17	137.58	ISHQVYNK(1)VDDYIK	2	2.1494	15	1.262	1.087	1.162	1.187		1.131	0.853	0.753	0.709	0.889	0.893	0.766			1.002		1.128			1.128	1.05				1.167	1.1	1.121	1.27	1.214	1.176	0.869	0.812	0.879	0.754	0.76	0.865	1.009	0.988
Capana01g002860	330	K	SECA_SPIOL Protein translocase subunit SecA, chloroplastic OS=Spinacia oleracea GN=secA PE=2 SV=1	secA	1	0.00471819	45.939	MLTK(1)ALDEAQR	2	-5.1768	1									1																1.18	1.255	1.126	1.04	1.034	1.065	1.32	1.332	1.292	1.135	1.169	1.15	0.941	0.946
Capana01g002878	149	K	CGEP_ORYSJ Probable glutamyl endopeptidase, chloroplastic OS=Oryza sativa subsp. japonica GN=GEP PE=2 SV=1	GEP	1	1.05643e-27	162.21	WLQK(1)HCVYSSDVK	2	6.2757	45	1.693	1.676	1.836	1.673	1.709	1.386	1.112	1.054	1.077	0.855	1.055	0.928	0.834	0.897	0.908	0.86	0.875	0.928	0.628	0.68	0.705	0.236	0.187	0.207	1.261	1.209	1.16	1.11	1.129	1.049	1.263	1.243	1.251	1.066	1.036	1.109	1.042	0.832
Capana01g002883	99	K	PRX2B_ARATH Peroxiredoxin-2B OS=Arabidopsis thaliana GN=PRXIIB PE=1 SV=1	PRXIIB	1	1.97102e-07	117.99	HVK(1)FLADGAGK	2	-6.5598	19	1.454	1.189	0.857	1.184	0.369	1.532	0.865	0.841	0.838		0.837	0.933		0.727	0.747	0.97	0.916			0.684	0.59		1.561	1.906	0.586	0.762	0.783	0.748	0.822	0.938	0.953	0.988	0.928	1.24	1.269	1.241	0.797	0.878
Capana01g002883	62	K	PRX2B_ARATH Peroxiredoxin-2B OS=Arabidopsis thaliana GN=PRXIIB PE=1 SV=1	PRXIIB	1	0.01551	58.313	HVPGFIEK(1)ADLLK	2	-6.5536	4										0.71	0.587												1.347	1.355	0.586	0.762	0.783	0.748	0.822	0.938	0.953	0.988	0.928	1.24	1.269	1.241	0.797	0.878
Capana01g002908	471	K	PYRG_DICDI CTP synthase OS=Dictyostelium discoideum GN=ctps PE=3 SV=1	ctps	1	5.16778e-06	72.922	LYNNSK(1)YVDER	2	-6.705	10		1.258	0.977	0.735	1.536	1.322		0.965						1.294		0.75			0.86			0.303			0.587	0.961		1.152	1.312	1.211		1.005	0.796	1.202	0.91	0.906	0.902	1.129
Capana01g002916	164	K	TM205_XENLA Transmembrane protein 205 OS=Xenopus laevis GN=tmem205 PE=2 SV=1	tmem205	1	0.000196142	74.733	EANIGEEVGWTK(1)NQEVAK	2	1.9726	2																	1.076	0.924							0.354		0.209	0.226	0.274	1.859	0.232	1.37		1.506	0.86	0.311	1.121	0.39
Capana01g002934	374	K	GLGL3_SOLTU Glucose-1-phosphate adenylyltransferase large subunit 3, chloroplastic/amyloplastic OS=Solanum tuberosum GN=AGPS3 PE=2 SV=1	AGPS3	1	0.000274566	110.44	FSFYDATK(1)PIYTSR	2	-2.2322	7					0.944			0.889					1.039	0.972	0.825				1.125	1.205					0.902	0.964	0.988	0.973	0.982	0.984	1.104	1.124	1.149	1.045	1.056	1.048	1.006	1.017
Capana01g002939	88	K	PRX2F_ARATH Peroxiredoxin-2F, mitochondrial OS=Arabidopsis thaliana GN=PRXIIF PE=1 SV=2	PRXIIF	1	2.60605e-08	62.804	VVIFGLPGAYTGVCSMQHVPSYK(1)NNIDK	3	1.8005	4								1.274				0.726													0.942	0.697	0.707	0.733	0.731	0.509	0.858	0.803	0.902	1.119	1.312	1.234	0.649	0.746
Capana01g002939	51	K	PRX2F_ARATH Peroxiredoxin-2F, mitochondrial OS=Arabidopsis thaliana GN=PRXIIF PE=1 SV=2	PRXIIF	1	8.71777e-05	141.88	SWDEGVSSK(1)FSTTPLK	2	0.035841	6										1.192						0.615		0.682				1.057	1.454		0.942	0.697	0.707	0.733	0.731	0.509	0.858	0.803	0.902	1.119	1.312	1.234	0.649	0.746
Capana01g002948	202	K	7SB1_SOYBN Basic 7S globulin OS=Glycine max GN=BG PE=1 SV=2	BG	1	0.00876686	65.933	K(1)FAVCLSSSK	2	-9.1828	1																								1	0.886	0.993	1.002	1.172	1.254	1.276	0.61	0.663	0.633	1.459	1.472	1.37	0.839	0.877
Capana01g002957	201	K	7SB1_SOYBN Basic 7S globulin OS=Glycine max GN=BG PE=1 SV=2	BG	1	0.000152526	74.524	K(1)FAICLTSSPTSR	2	-9.9191	9												1.4	0.617	1.635	1.352	0.573		1.227				0.697	0.696	0.802	0.888	0.876	0.804	0.889	0.871	0.846	0.814	0.822	0.777	1.088	1.081	1.118	0.916	0.949
Capana01g002957	83	K	7SB1_SOYBN Basic 7S globulin OS=Glycine max GN=BG PE=1 SV=2	BG	1	2.7265e-05	117.77	GYVSSTYK(1)PVPCGSVTCK	2	-2.1624	7			0.781								0.339						0.483		0.275			1.775	1.495	1.853	0.888	0.876	0.804	0.889	0.871	0.846	0.814	0.822	0.777	1.088	1.081	1.118	0.916	0.949
Capana01g003035	194	K	Tyrosine-protein phosphatase cdc-14	---	1	0.0139016	62.969	HVVFWVEK(1)R	2	-13.777	3									0.376								1.396	1.228							0.769	0.867	0.834	0.846	0.825	0.858	1.164	1.117	1.142	1.147	1.102	1.101	0.863	0.886
Capana01g003035	186	K	Tyrosine-protein phosphatase cdc-14	---	1	8.59254e-11	78.157	ITAK(1)HVVFWVEK	2	-5.5467	16					0.612		0.898	0.931	1.108	0.907	0.882	0.99	0.724			0.658	0.651	0.782	0.896	0.838		1.739	1.667	1.717	0.769	0.867	0.834	0.846	0.825	0.858	1.164	1.117	1.142	1.147	1.102	1.101	0.863	0.886
Capana01g003039	98	K	CBSX3_ARATH CBS domain-containing protein CBSX3, mitochondrial OS=Arabidopsis thaliana GN=CBSX3 PE=1 SV=1	CBSX3	1	0.000649154	93.649	SMTQHNVGALVVVK(1)SGENK	2	-1.7593	14				0.864	0.915		0.76		0.974	0.993	0.78		0.901			0.648						1.34	1.441	1.385	0.752	0.79	0.809	0.883	0.837	0.854	0.884	0.897	0.817	1.178	1.15	1.186	0.888	0.927
Capana01g003039	129	K	CBSX3_ARATH CBS domain-containing protein CBSX3, mitochondrial OS=Arabidopsis thaliana GN=CBSX3 PE=1 SV=1	CBSX3	1	0.0162804	60	STK(1)VGDIMTEENK	2	-6.5043	2					0.907		1.093																		0.752	0.79	0.809	0.883	0.837	0.854	0.884	0.897	0.817	1.178	1.15	1.186	0.888	0.927
Capana01g003039	54	K	CBSX3_ARATH CBS domain-containing protein CBSX3, mitochondrial OS=Arabidopsis thaliana GN=CBSX3 PE=1 SV=1	CBSX3	1	0.000238009	113.86	IEEHGFESTK(1)ISDILK	2	-0.7162	27	0.992		0.974	0.979	1.004	0.785				0.679	0.962	0.889		0.976	0.808		0.713		0.959		0.787	1.521	1.553	1.419	0.752	0.79	0.809	0.883	0.837	0.854	0.884	0.897	0.817	1.178	1.15	1.186	0.888	0.927
Capana01g003044	56	K	GLYR1_AEDAE Putative oxidoreductase GLYR1 homolog OS=Aedes aegypti GN=AAEL006684 PE=3 SV=1	AAEL006684	1	4.79071e-15	108.5	GPAMIK(1)HSYPPAFPLK	2	-1.8106	18	1.14	1.104	1.215				1.002			0.885	1.095	0.902	1.022				0.926	0.904	0.529	1.149				1.129	0.74	0.751	0.774	0.719	0.784	0.788	0.865	0.858	0.877	0.984	0.933	0.917	1.114	1.115
Capana01g003044	70	K	GLYR1_AEDAE Putative oxidoreductase GLYR1 homolog OS=Aedes aegypti GN=AAEL006684 PE=3 SV=1	AAEL006684	1	0.0103563	85.813	HQQK(1)DMR	2	-2.9522	7					0.764		0.854		0.947		1.139	1.126				0.989				1.181					0.74	0.751	0.774	0.719	0.784	0.788	0.865	0.858	0.877	0.984	0.933	0.917	1.114	1.115
Capana01g003049	327	K	GLNA2_DAUCA Glutamine synthetase, chloroplastic OS=Daucus carota GN=GLN2 PE=2 SV=1	GLN2	1	0.000488799	76.572	EEGGFEVIK(1)K	2	-8.4025	9					0.847	0.939		1.017				1.283	1.043				0.735	0.852	0.87				1.414		0.83	0.888	0.853	0.849	0.856	0.892	1.054	1.085	1.088	0.984	0.968	0.907	1.07	1.051
Capana01g003049	112	K	GLNA2_DAUCA Glutamine synthetase, chloroplastic OS=Daucus carota GN=GLN2 PE=2 SV=1	GLN2	0.948008	3.49892e-128	87.721	TISK(0.052)PVQHASELPK(0.948)WNYDGSSTGQAPGEDSEVILYPQAIFK	4	-0.38692	2										1.165						0.835									0.83	0.888	0.853	0.849	0.856	0.892	1.054	1.085	1.088	0.984	0.968	0.907	1.07	1.051
Capana01g003049	169	K	GLNA2_DAUCA Glutamine synthetase, chloroplastic OS=Daucus carota GN=GLN2 PE=2 SV=1	GLN2	1	3.49639e-08	179.31	HK(1)AAQIFSDPK	2	1.9167	28	1.066	1.111	1.064	0.991	1.126	1.094	1.078	1.058	1.035	0.883	0.837	0.843	1.222	1.209	1.19	0.9	0.855	0.854	0.857	0.813	0.878	1.005	1.006	1.024	0.83	0.888	0.853	0.849	0.856	0.892	1.054	1.085	1.088	0.984	0.968	0.907	1.07	1.051
Capana01g003049	338	K	GLNA2_DAUCA Glutamine synthetase, chloroplastic OS=Daucus carota GN=GLN2 PE=2 SV=1	GLN2	1	1.11214e-115	232.35	HK(1)EHISAYGEGNER	2	-5.9938	52	0.988	0.846	1.192	0.854	0.956	0.894	1.185	0.414	1.057	0.291	0.94	0.833	0.505	1.119	1.125	0.93	1.079	1.188	1.191	1.454	1.135	1.394	1.224	1.205	0.83	0.888	0.853	0.849	0.856	0.892	1.054	1.085	1.088	0.984	0.968	0.907	1.07	1.051
Capana01g003049	102	K	GLNA2_DAUCA Glutamine synthetase, chloroplastic OS=Daucus carota GN=GLN2 PE=2 SV=1	GLN2	1	0.0014767	80.623	TISK(1)PVQHASELPK	2	-3.9441	20	0.961		0.963	0.892	0.991		0.976	0.955	0.974	0.868	1.007	0.899			1.041		0.922	0.873	1.041	1.097	1.034	1.252		1.254	0.83	0.888	0.853	0.849	0.856	0.892	1.054	1.085	1.088	0.984	0.968	0.907	1.07	1.051
Capana01g003049	386	K	GLNA2_DAUCA Glutamine synthetase, chloroplastic OS=Daucus carota GN=GLN2 PE=2 SV=1	GLN2	1	0.00277718	130.31	QGK(1)GYLEDR	2	-7.4296	22	0.652	0.757	0.522	0.879	0.809	0.859	1.177	1.286	1.143	0.973		0.949	1.185	1.251	1.19	1.228	0.853	1.154	1.026	1.042	1.252	0.92	0.891		0.83	0.888	0.853	0.849	0.856	0.892	1.054	1.085	1.088	0.984	0.968	0.907	1.07	1.051
Capana01g003049	355	K	GLNA2_DAUCA Glutamine synthetase, chloroplastic OS=Daucus carota GN=GLN2 PE=2 SV=1	GLN2	1	2.66938e-141	227.73	RLTGK(1)HETASIDQFSWGVANR	3	-2.3076	110	0.699	0.665	0.575	1.173	0.862	1.162	0.76	1.439	1.643	0.779		0.955	1.684	0.912	1.04	1.199	1.137	1.116	1.052	0.542	0.668	0.875	1.076	0.987	0.83	0.888	0.853	0.849	0.856	0.892	1.054	1.085	1.088	0.984	0.968	0.907	1.07	1.051
Capana01g003067	362	K	PPDK_MESCR Pyruvate, phosphate dikinase, chloroplastic OS=Mesembryanthemum crystallinum GN=PPD PE=2 SV=1	PPD	1	7.53982e-47	192.95	ELVENCEILEK(1)HYK	2	5.2553	20	1.058	1.02	1.152	0.952	0.999	0.978	1.047	0.984	0.979			0.537	1.088	1.296	1.163	0.87	0.833	0.998	1.006	0.984	1.057				0.832	0.812	0.785	0.632	0.627	0.637	1.333	1.369	1.325	0.857	0.848	0.874	0.955	0.895
Capana01g003067	233	K	PPDK_MESCR Pyruvate, phosphate dikinase, chloroplastic OS=Mesembryanthemum crystallinum GN=PPD PE=2 SV=1	PPD	1	2.26775e-62	181.87	QLVEQYK(1)NVYIEAK	2	4.9817	24	1.06	1.018	1.035	0.769	0.776	0.806	1.995	2.048	1.965	0.717	0.717	0.722	0.93	0.905	0.903	1.11	1.144	0.985	1.19	1.106	1.155	0.301	0.312	0.332	0.832	0.812	0.785	0.632	0.627	0.637	1.333	1.369	1.325	0.857	0.848	0.874	0.955	0.895
Capana01g003096	463	K	SYI_NOSP7 Isoleucine--tRNA ligase OS=Nostoc punctiforme (strain ATCC 29133 / PCC 73102) GN=ileS PE=3 SV=1	ileS	1	0.00237917	96.311	HK(1)YPYDWR	2	-5.8101	7			0.83				0.944		1.419								1.211	0.948	0.818	0.83					1.131	1.12	1.108	1.015	1.003	1	1.438	1.421	1.394	0.963	0.984	0.95	0.936	0.945
Capana01g003096	76	K	SYI_NOSP7 Isoleucine--tRNA ligase OS=Nostoc punctiforme (strain ATCC 29133 / PCC 73102) GN=ileS PE=3 SV=1	ileS	1	0.012093	58.916	IWDDNQVFK(1)R	2	0.69869	2															0.856						1.144				1.131	1.12	1.108	1.015	1.003	1	1.438	1.421	1.394	0.963	0.984	0.95	0.936	0.945
Capana01g003096	168	K	SYI_NOSP7 Isoleucine--tRNA ligase OS=Nostoc punctiforme (strain ATCC 29133 / PCC 73102) GN=ileS PE=3 SV=1	ileS	1	3.21068e-06	110.58	FAK(1)STVQSQMASFK	2	-3.2228	8			1.219	0.902			1.281			0.801							1.011	1.081			1.111			0.595	1.131	1.12	1.108	1.015	1.003	1	1.438	1.421	1.394	0.963	0.984	0.95	0.936	0.945
Capana01g003103	308	K	Putative NAD(P)-binding Rossmann-fold superfamily protein-like	---	1	6.78367e-10	139.61	FEGFTGTNGPLGK(1)K	2	-4.9831	44	0.876	0.954	1.017			0.807		0.808	1.052	1.031					0.887	0.933	0.84	0.892	0.8	1.018	1.061	1.455	1.169	1.401	0.841	0.961	0.932	1.086	1.033	1.089	1.126	1.06	1.08	0.966	0.933	0.903	1.03	1.011
Capana01g003112	64	K	ACP1_CASGL Acyl carrier protein 1, chloroplastic OS=Casuarina glauca GN=ACP1 PE=2 SV=1	ACP1	1	4.93418e-08	63.301	VCEIVK(1)K	2	-2.6619	23	0.689	0.569	0.573	0.763	0.906	1.437	1.502	1.368	1.46	1.017	0.803	1.168	1.037	1.047	0.76	1.086	0.771		1.078		0.503	1.077	1.249	1.138
Capana01g003113	134	K	SODC_CAPAN Superoxide dismutase [Cu-Zn] OS=Capsicum annuum GN=SODCC PE=2 SV=1	SODCC	1	7.61751e-96	217.24	GGHELSK(1)TTGNAGGR	2	-6.7478	21	1.266	1.224	1.29	2.067	1.742	1.77	0.424	0.305	0.388		1.772	1.84	0.49	0.677	0.712	0.304	0.138		0.58		0.594	1.119	1.187	1.112	1.236	1.319	1.128	2.234	2.435	1.726	0.504	0.492	0.458	1.692	2.16	1.64	0.401	0.416
Capana01g003148	152	K	C3H58_ARATH Zinc finger CCCH domain-containing protein 58 OS=Arabidopsis thaliana GN=At5g18550 PE=2 SV=1	At5g18550	1	1.35672e-12	145.75	ECSYYVK(1)TGQCK	2	-7.0705	13		1.968	0.944				0.8	0.888	0.859	0.456			1.47	1.119	0.916	0.961		0.916	0.721	0.982
Capana01g003169	189	K	divinyl chlorophyllide a 8-vinyl-reductase, chloroplastic	---	1	0.00124865	78.043	IDYEATK(1)NSLVAGR	2	-9.0153	6		1.061	0.942	1.14				1.33		0.72						0.807									0.935	0.981	1.091	1.103	1.136	1.13	1.365	1.264	1.227	0.993	1.053	1.039	0.992	0.988
Capana01g003185	66	K	DYL2_RAT Dynein light chain 2, cytoplasmic OS=Rattus norvegicus GN=Dynll2 PE=1 SV=1	Dynll2	1	0.00799434	47.361	CNVEK(1)DVAEQIK	2	-9.0715	1													1
Capana01g003189	333	K	ESD4_ARATH Ubiquitin-like-specific protease ESD4 OS=Arabidopsis thaliana GN=ESD4 PE=1 SV=1	ESD4	1	4.22208e-06	150.17	DHQVLK(1)VLAR	2	-7.8699	23	1.23	1.174	1.124	0.992	1.034	0.992	1.047		1.092	0.765	0.691	0.822	1.093	0.988	0.961	1.166	1.112	1.142	1.129	1.167	1.233	0.62	0.721	0.705
Capana01g003217	99	K	RK2_SOLTU 50S ribosomal protein L2, chloroplastic OS=Solanum tuberosum GN=rpl2-A PE=3 SV=1	rpl2-A	1	9.37811e-05	133.49	NAYICLIHYGDGEK(1)R	2	11.186	15	1.103			1.164		0.995		1.273	1.163						1.178	0.704	0.895	0.873	1.049	1.037	0.892		0.685	0.989	0.792	0.992	1.097	1.052	1.082	1.06	1.282	1.203	1.213	0.821	0.867	0.835	1.123	1.122
Capana01g003217	7	K	RK2_SOLTU 50S ribosomal protein L2, chloroplastic OS=Solanum tuberosum GN=rpl2-A PE=3 SV=1	rpl2-A	1	0.00113735	64.906	AIHLYK(1)TSTPSTR	2	-5.6077	3			0.66										1.324					1.016							0.792	0.992	1.097	1.052	1.082	1.06	1.282	1.203	1.213	0.821	0.867	0.835	1.123	1.122
Capana01g003217	23	K	RK2_SOLTU 50S ribosomal protein L2, chloroplastic OS=Solanum tuberosum GN=rpl2-A PE=3 SV=1	rpl2-A	1	0.0127635	55.578	NGTVDSQVK(1)SNPR	2	-6.6813	1	1																								0.792	0.992	1.097	1.052	1.082	1.06	1.282	1.203	1.213	0.821	0.867	0.835	1.123	1.122
Capana01g003224	416	K	CISY_DAUCA Citrate synthase, mitochondrial OS=Daucus carota GN=CS PE=2 SV=1	CS	1	3.29358e-06	108.93	SVTMEWLENHCK(1)K	2	5.5908	16													1.017	1.066	0.947	1.203		1.193	1.003	1.04		0.794	0.738		0.733	0.849	0.939	1.014	1.038	1.053	0.931	0.908	0.876	0.85	0.838	0.878	1.134	1.095
Capana01g003224	279	K	CISY_DAUCA Citrate synthase, mitochondrial OS=Daucus carota GN=CS PE=2 SV=1	CS	1	3.72556e-15	137.39	SVVEECGENISK(1)EQLK	2	-3.8784	20	1.417	1.013	1.367	1.155		1.76	1.024		0.682	0.696	0.564	0.761	1.479	1.179	1.384	0.911	0.954	1.073	0.661	0.584		0.679	0.655		0.733	0.849	0.939	1.014	1.038	1.053	0.931	0.908	0.876	0.85	0.838	0.878	1.134	1.095
Capana01g003224	404	K	CISY_DAUCA Citrate synthase, mitochondrial OS=Daucus carota GN=CS PE=2 SV=1	CS	1	0.00137886	112.7	PK(1)SVTMEWLENHCK	3	-7.625	6													1.175	1.305	1.23	0.838		0.885				0.566			0.733	0.849	0.939	1.014	1.038	1.053	0.931	0.908	0.876	0.85	0.838	0.878	1.134	1.095
Capana01g003225	239	K	PGMC_SOLTU Phosphoglucomutase, cytoplasmic OS=Solanum tuberosum GN=PGM1 PE=2 SV=1	PGM1	1	7.38205e-08	126.21	FSFCYDALHGVAGVHAK(1)R	3	-8.0033	19			1.206	1.294	1.351	1.294	1.142	0.908		0.766	0.827	0.685	1.107	1.086	1.236	0.751		0.851	0.893	0.99	1.044		0.779	0.79	0.993	1.001	1.009	1.009	0.999	1.035	1.075	1.067	1.079	0.963	0.942	0.935	1.055	1.013
Capana01g003225	222	K	PGMC_SOLTU Phosphoglucomutase, cytoplasmic OS=Solanum tuberosum GN=PGM1 PE=2 SV=1	PGM1	1	4.14782e-06	69.613	LLSSPK(1)FSFCYDALHGVAGVHAK	3	-4.3019	3													1.178						1.006		0.816				0.993	1.001	1.009	1.009	0.999	1.035	1.075	1.067	1.079	0.963	0.942	0.935	1.055	1.013
Capana01g003259	109	K	RS16_FRIAG 40S ribosomal protein S16 OS=Fritillaria agrestis GN=RPS16 PE=2 SV=1	RPS16	1	0.00279502	72.492	FVDEQQK(1)K	2	-5.5099	12	0.963	0.994		1.235		1.211	0.798			0.878					1.097				0.842	0.808		0.936	1.127	1.111	1.207	1.069	1.113	1.154	1.178	1.184	0.842	0.824	0.874	0.844	0.852	0.885	1.129	1.151
Capana01g003292	53	K	GST23_MAIZE Glutathione transferase GST 23 OS=Zea mays PE=2 SV=1	---	1	6.31945e-26	141.29	SPLILQCNPVHK(1)K	2	1.7194	40	0.906	0.904	0.999	0.947	0.939	0.926	0.934	0.843	0.906	0.457	0.521	0.439	1.487	1.57	1.532	1.307	1.237	1.325	1.066	1.263	1.23	0.744	0.731	0.786	0.933	0.902	0.938	0.805	0.842	0.82	0.868	0.889	0.96	0.736	0.768	0.764	1.388	1.261
Capana01g003292	100	K	GST23_MAIZE Glutathione transferase GST 23 OS=Zea mays PE=2 SV=1	---	1	0.00707912	86.205	FWVK(1)FVDDK	2	-7.9138	12	1.092			0.869			0.954		0.933	0.605			1.503	0.939	1.207	1.042	1.071	1.108			0.677				0.933	0.902	0.938	0.805	0.842	0.82	0.868	0.889	0.96	0.736	0.768	0.764	1.388	1.261
Capana01g003296	52	K	GST23_MAIZE Glutathione transferase GST 23 OS=Zea mays PE=2 SV=1	---	1	1.18356e-11	99.174	SPELLQYNPVHK(1)K	2	2.0669	13	1.097			1.05	1.143			0.899		0.955	0.91			1.078					0.774				1.095		1.102	1.244	1.144	1.194	1.097	1.117	1.059	1.076	1.022	1.194	1.178	1.232	0.897	0.901
Capana01g003296	217	K	GST23_MAIZE Glutathione transferase GST 23 OS=Zea mays PE=2 SV=1	---	1	0.0131797	71.066	FQLLHEK(1)YQTGN	2	-0.24143	4												1.217										0.97		0.813	1.102	1.244	1.144	1.194	1.097	1.117	1.059	1.076	1.022	1.194	1.178	1.232	0.897	0.901
Capana01g003296	210	K	GST23_MAIZE Glutathione transferase GST 23 OS=Zea mays PE=2 SV=1	---	1	1.49198e-06	127.93	LVTK(1)FQLLHEK	2	1.9222	29	1.346	1.267	0.941	0.815		0.869	1.05		1.543	1.121	0.721			0.886	0.517		0.749	0.959			0.711		1.505		1.102	1.244	1.144	1.194	1.097	1.117	1.059	1.076	1.022	1.194	1.178	1.232	0.897	0.901
Capana01g003323	195	K	arp2/3 complex-activating protein rickA	---	1	0.000170614	93.772	FDPSDPFQHWYK(1)DER	2	1.4959	13		0.707					1			0.739				0.898		0.477	0.698					1.119	2.192	1.17	0.932	0.946	0.912	0.908	0.899	0.908	0.939	0.957	0.962	1.173	1.205	1.2	0.938	0.876
Capana01g003349	674	K	EIF3B_TOBAC Eukaryotic translation initiation factor 3 subunit B OS=Nicotiana tabacum GN=TIF3B1 PE=2 SV=1	TIF3B1	1	0.019109	59.645	LHEEEK(1)MER	2	-4.8252	2							1.219			0.781															1.081	1.064	1.026	0.923	0.93	0.977	1.263	1.252	1.241	1.306	1.211	1.205	0.865	0.845
Capana01g003385	449	K	DRP1E_ARATH Dynamin-related protein 1E OS=Arabidopsis thaliana GN=DRP1E PE=1 SV=1	DRP1E	1	0.00207218	69.915	SIGECQELK(1)R	2	-7.6069	4				1.299			1.045	1.238							0.419										1.108	1.06	1.065	1.123	1.1	1.143	0.894	0.903	0.915	0.93	0.899	0.877	0.995	1.049
Capana01g003385	290	K	DRP1E_ARATH Dynamin-related protein 1E OS=Arabidopsis thaliana GN=DRP1E PE=1 SV=1	DRP1E	1	0.000685622	96.946	LLSK(1)HLEQFIK	2	-6.5815	17	0.851	0.975	0.998	1.069	1.075	0.936			0.6		0.861			1.023		0.837	0.795	0.795	0.858		0.985	1.402	1.494	1.444	1.108	1.06	1.065	1.123	1.1	1.143	0.894	0.903	0.915	0.93	0.899	0.877	0.995	1.049
Capana01g003385	79	K	DRP1E_ARATH Dynamin-related protein 1E OS=Arabidopsis thaliana GN=DRP1E PE=1 SV=1	DRP1E	1	2.51286e-39	153.56	RPLVLQLHK(1)TDEGQQEYAEFGHLPR	4	-2.0956	25	1.775	1.644	1.451	1.304	1.277	1.253	1.026	0.845	0.92	0.68	0.88	0.798	0.805	0.79	1	0.597	0.796	0.67	0.79	0.814	0.883				1.108	1.06	1.065	1.123	1.1	1.143	0.894	0.903	0.915	0.93	0.899	0.877	0.995	1.049
Capana01g003391	22	K	RAH1B_ARATH Ras-related protein RABH1b OS=Arabidopsis thaliana GN=RABH1B PE=1 SV=1	RABH1B	1	0.00459151	50.641	LVFLGDQSVGK(1)TSIITR	2	-4.8871	1																						1			0.785	0.871	0.9	1.064	1.04	1.104	0.823	0.926	0.711	0.893	0.888	0.892	1.114	1.052
Capana01g003394	127	K	protein TRIGALACTOSYLDIACYLGLYCEROL 4, chloroplastic	---	1	0.0177544	58.889	DIGK(1)HFLEK	2	-6.066	2																0.931							1.069		0.923	1.049	1.01	1.203	1.143	1.159	0.933	0.923	0.936	0.747	0.801	0.806	0.996	0.985
Capana01g003395	75	K	CH10C_ARATH 20 kDa chaperonin, chloroplastic OS=Arabidopsis thaliana GN=CPN21 PE=1 SV=2	CPN21	1	7.31069e-07	126.17	SAGGVLLPK(1)SAVTFER	2	-5.1322	20	0.473	0.588	0.617	1.195	0.96	1.047		0.799	0.577	1.537	0.925	1.256	1.413		0.801	1.03	0.988	0.956			0.692	1.444	1.273	1.429	0.636	0.545	0.581	0.582	0.582	0.571	0.697	0.789	0.789	1.197	1.213	1.161		1.055
Capana01g003407	12	K	IF4G1_ARATH Eukaryotic translation initiation factor 4G OS=Arabidopsis thaliana GN=EIF4G PE=1 SV=2	EIF4G	1	0.0153623	65.156	IMHECIK(1)K	2	-4.1491	5			1.07	0.896	1.049	1.215								0.77											0.877		0.427		0.974	1.284	0.978	0.932	1.014	0.95		1.055	1.002	0.378
Capana01g003417	826	K	GANAB_DICDI Neutral alpha-glucosidase AB OS=Dictyostelium discoideum GN=modA PE=3 SV=1	modA	1	0.0181112	41.796	SFEFK(1)HGAFVHR	3	-6.3916	1		1																							1.185	1.152	1.141	1.098	1.153	1.088	0.915	0.967	0.972	1.136	1.145	1.171	1.063	1.078
Capana01g003521	656	K	SYGM2_ARATH Glycine--tRNA ligase 2, chloroplastic/mitochondrial OS=Arabidopsis thaliana GN=GLYRS-2 PE=1 SV=1	GLYRS-2	1	7.57428e-29	165.39	HQK(1)YFAMTDENGK	2	3.0874	22	1.087	1.162	1.238	1.026	1.106	1.082	1.467	1.451	1.39	0.901		0.906	0.843	0.761	0.611	0.904	0.709	0.931	0.968	0.708	0.749				1.151	1.177	1.147	0.971	0.946	0.934	1.448	1.468	1.47	1.094	1.069	1.121	0.799	0.802
Capana01g003521	243	K	SYGM2_ARATH Glycine--tRNA ligase 2, chloroplastic/mitochondrial OS=Arabidopsis thaliana GN=GLYRS-2 PE=1 SV=1	GLYRS-2	1	5.73565e-05	92.707	ILMSLQGADHFK(1)K	2	-8.5018	12		0.877	1.442	0.696	0.644	0.926		1.402	1.165			1.125		0.738					1.138	1.002			0.844		1.151	1.177	1.147	0.971	0.946	0.934	1.448	1.468	1.47	1.094	1.069	1.121	0.799	0.802
Capana01g003521	653	K	SYGM2_ARATH Glycine--tRNA ligase 2, chloroplastic/mitochondrial OS=Arabidopsis thaliana GN=GLYRS-2 PE=1 SV=1	GLYRS-2	1	0.000760505	103.8	ELLIMVMQK(1)HQK	2	2.2913	11		1.033	0.958	0.804	0.722	0.823	1.433	1.124	1.226			0.754							1.067	1.057					1.151	1.177	1.147	0.971	0.946	0.934	1.448	1.468	1.47	1.094	1.069	1.121	0.799	0.802
Capana01g003524	176	K	RAD2A_ARATH Ras-related protein RABD2a OS=Arabidopsis thaliana GN=RABD2A PE=1 SV=3	RABD2A	1	0.0021484	76.85	ILVGNK(1)SDLVANR	2	-8.5081	12		0.985			1.262	1.01		0.986						0.942				1.177	0.937				0.701		1.18	1.166	0.857	1.09	1.145	1.021	0.585	0.727	0.651	0.629	0.726	1.053	1.086	1.053
Capana01g003544	403	K	TCPA_ARATH T-complex protein 1 subunit alpha OS=Arabidopsis thaliana GN=CCT1 PE=2 SV=1	CCT1	1	5.81816e-78	247.5	ALHDALCIVK(1)R	2	-9.4638	23	1.159	1.159	1.123	0.956	1.042	1.031	1.136	1.019	1.094	0.838	0.83	0.81	0.95	0.965	0.925	1.145	1.154	1.182	1.154	1.243	1.202	0.434	0.45		1.177	1.162	1.189	1.009	1.036	1.044	1.08	1.036	1.046	1.086	1.083	1.028	0.978	0.945
Capana01g003544	156	K	TCPA_ARATH T-complex protein 1 subunit alpha OS=Arabidopsis thaliana GN=CCT1 PE=2 SV=1	CCT1	1	0.000382727	84.999	DSLINCAK(1)TSMSSK	2	-4.6988	4	0.938											1.078			1.108				0.876						1.177	1.162	1.189	1.009	1.036	1.044	1.08	1.036	1.046	1.086	1.083	1.028	0.978	0.945
Capana01g003544	484	K	TCPA_ARATH T-complex protein 1 subunit alpha OS=Arabidopsis thaliana GN=CCT1 PE=2 SV=1	CCT1	1	1.02645e-10	140.57	K(1)HLSSMGLDLAK	2	-5.6986	15		1.25	0.967	0.931	0.739	1.41	0.889	0.652		0.638	0.654		1.564			0.66	1.943		0.836	0.905	0.962				1.177	1.162	1.189	1.009	1.036	1.044	1.08	1.036	1.046	1.086	1.083	1.028	0.978	0.945
Capana01g003544	480	K	TCPA_ARATH T-complex protein 1 subunit alpha OS=Arabidopsis thaliana GN=CCT1 PE=2 SV=1	CCT1	1	0.000161161	108.24	SCHYLAQTK(1)ADK	2	-6.7655	6		1.415			1.16			0.689			0.783					0.832			1.122						1.177	1.162	1.189	1.009	1.036	1.044	1.08	1.036	1.046	1.086	1.083	1.028	0.978	0.945
Capana01g003555	90	K	S6PD_MALDO NADP-dependent D-sorbitol-6-phosphate dehydrogenase OS=Malus domestica GN=S6PDH PE=2 SV=1	S6PDH	1	0.000910923	56.08	LWNSDHGHVLEACK(1)DSLK	3	-8.6535	1																							1		0.994	0.974	0.978	1.038	1.025	1.02	0.89	0.9	0.915	0.995	0.926	0.974	0.966	1.011
Capana01g003564	41	K	VAP12_ARATH Vesicle-associated protein 1-2 OS=Arabidopsis thaliana GN=PVA12 PE=1 SV=1	PVA12	1	0.0188756	52.591	SDDHVAFK(1)VK	2	-6.4506	2	0.958																							1.042	0.946	0.986	0.929	1.225	1.093	1.101	0.794	0.773	0.877	0.837	0.819	0.826	1.008	1.008
Capana01g003589	308	K	AMP2B_ARATH Methionine aminopeptidase 2B OS=Arabidopsis thaliana GN=MAP2B PE=2 SV=2	MAP2B	1	2.30661e-20	162	EDLECSHYMK(1)NFDIGHIPLR	3	-4.6684	9	1.251	1.191	1.136	1.212	1.123	1.107			0.455				0.675	0.85											1.185	1.107	1.056	1.062	1.098	1.063	0.944	0.981	0.979	0.946	0.927	0.994	1.019	0.934
Capana01g003613	40	K	NPC2_ASPOR Phosphatidylglycerol/phosphatidylinositol transfer protein OS=Aspergillus oryzae (strain ATCC 42149 / RIB 40) GN=pltp PE=1 SV=1	pltp	1	0.000220115	76.049	ANYDVK(1)VSEIDITPYPVHGGK	3	-8.5661	3																						0.975	1.047	0.977	0.762	0.832	0.802	0.983	0.891	0.958	0.956	0.824	0.901	1.249	1.211	1.039	0.96	0.939
Capana01g003621	329	K	FABD_MOUSE Malonyl-CoA-acyl carrier protein transacylase, mitochondrial OS=Mus musculus GN=Mcat PE=2 SV=3	Mcat	1	7.74827e-07	75.969	IPVISNVDAQPHADPDTIK(1)K	3	-0.6757	11													0.925	0.831	0.863							1.093	1.088	1.2	1.114	0.99	0.959	1.019	0.987	0.977	0.849	0.9	0.885	0.964	0.972	0.982	0.926	0.965
Capana01g003621	110	K	FABD_MOUSE Malonyl-CoA-acyl carrier protein transacylase, mitochondrial OS=Mus musculus GN=Mcat PE=2 SV=3	Mcat	1	0.000256839	118.06	VPAAAELYK(1)R	2	-6.9964	10						0.98				1.168	0.578	1.484	1.074	0.688	0.974		0.82		1.064		1.17				1.114	0.99	0.959	1.019	0.987	0.977	0.849	0.9	0.885	0.964	0.972	0.982	0.926	0.965
Capana01g003643	188	K	COPB2_ARATH Coatomer subunit beta-2 OS=Arabidopsis thaliana GN=At4g31490 PE=2 SV=2	At4g31490	1	2.19611e-07	137.58	IENVLTTEQDPSAK(1)R	2	-2.7369	18	1.137	1.03	1.099	0.996	1.003	0.866	1.115		1.176	0.799	0.693			0.997		0.994	1.087	0.905	1.01	1.109	1.319		0.664		1.254	1.219	1.202	1.078	1.088	1.119	1.179	1.18	1.197	0.911	0.936	0.879	1.036	1.028
Capana01g003662	261	K	BAS1B_ARATH 2-Cys peroxiredoxin BAS1-like, chloroplastic OS=Arabidopsis thaliana GN=At5g06290 PE=2 SV=3	At5g06290	0.999999	0.0183835	83.775	SMKPDPK(1)GSK	2	-4.2946	2			1																						0.795	0.936	0.915	0.927	0.904	0.933	1.095	1.108	1.061	1.261	1.286	1.225	0.838	0.833
Capana01g003662	185	K	BAS1B_ARATH 2-Cys peroxiredoxin BAS1-like, chloroplastic OS=Arabidopsis thaliana GN=At5g06290 PE=2 SV=3	At5g06290	1	4.81939e-05	80.128	SIAK(1)SYNVLIPDQGIALR	2	-4.341	2										1.578	0.422														0.795	0.936	0.915	0.927	0.904	0.933	1.095	1.108	1.061	1.261	1.286	1.225	0.838	0.833
Capana01g003662	107	K	BAS1B_ARATH 2-Cys peroxiredoxin BAS1-like, chloroplastic OS=Arabidopsis thaliana GN=At5g06290 PE=2 SV=3	At5g06290	1	0.0088952	49.325	LSEYIGK(1)K	2	-3.8254	7		0.557		0.892	0.896				0.915							0.884		0.565						2.29	0.795	0.936	0.915	0.927	0.904	0.933	1.095	1.108	1.061	1.261	1.286	1.225	0.838	0.833
Capana01g003678	69	K	UEV1D_ARATH Ubiquitin-conjugating enzyme E2 variant 1D OS=Arabidopsis thaliana GN=UEV1D PE=1 SV=1	UEV1D	1	1.81478e-43	162	IYQLK(1)LFCDK	2	-6.5159	57	1.616	1.315	1.25	1.361	1.366	1.474	0.811	0.774	0.804	0.951	1.169	1.058	0.966	1.163	1.035	0.658	0.622	0.598	0.918	0.837	0.809	0.769	0.874	0.801	1.028	0.91	0.882	0.939	0.907	0.925	0.792	0.816	0.767	1.094	1.124	1.104	0.895	0.921
Capana01g003678	74	K	UEV1D_ARATH Ubiquitin-conjugating enzyme E2 variant 1D OS=Arabidopsis thaliana GN=UEV1D PE=1 SV=1	UEV1D	1	0.000429089	115.05	LFCDK(1)DYPEKPPSVR	3	-8.6542	19		0.708		0.776	0.802	0.8		0.928	0.777	0.941	0.886	0.994			0.756	0.769		0.652		0.925	0.828	1.692	2.032	1.735	1.028	0.91	0.882	0.939	0.907	0.925	0.792	0.816	0.767	1.094	1.124	1.104	0.895	0.921
Capana01g003678	104	K	UEV1D_ARATH Ubiquitin-conjugating enzyme E2 variant 1D OS=Arabidopsis thaliana GN=UEV1D PE=1 SV=1	UEV1D	1	0.00023659	59.77	VNMTCVNHETGVVEPK(1)K	3	-7.0523	6					1.204				0.98	0.98	1.019	1.134									0.682				1.028	0.91	0.882	0.939	0.907	0.925	0.792	0.816	0.767	1.094	1.124	1.104	0.895	0.921
Capana01g003678	105	K	UEV1D_ARATH Ubiquitin-conjugating enzyme E2 variant 1D OS=Arabidopsis thaliana GN=UEV1D PE=1 SV=1	UEV1D	1	9.86704e-05	113.7	K(1)FGLLANWQR	2	-10.68	13				0.867	0.799	1.203				1.511			1.17	0.553	0.739		0.768	0.694			0.64	1.325	1.398	1.331	1.028	0.91	0.882	0.939	0.907	0.925	0.792	0.816	0.767	1.094	1.124	1.104	0.895	0.921
Capana01g003678	79	K	UEV1D_ARATH Ubiquitin-conjugating enzyme E2 variant 1D OS=Arabidopsis thaliana GN=UEV1D PE=1 SV=1	UEV1D	0.999963	0.00121055	67.887	LFCDKDYPEK(1)PPSVR	2	-2.16	6	1.018	1.24		1.107		1.267							0.515							0.853					1.028	0.91	0.882	0.939	0.907	0.925	0.792	0.816	0.767	1.094	1.124	1.104	0.895	0.921
Capana01g003695	229	K	Putative ovule protein	---	1	7.31069e-07	85.081	NAVQGCNK(1)IIYCATAR	2	-4.9321	11	0.919	1.3	1.126	1.006	1.465	1.23	0.744	0.816					1.002	0.747	0.644										1.18	1.118	1.076	1.139	1.104	1.092	1.317	1.249	1.309	0.909	0.935	0.906	1.069	1.086
Capana01g003725	110	K	RISB_ARATH 6,7-dimethyl-8-ribityllumazine synthase, chloroplastic OS=Arabidopsis thaliana GN=At2g44050 PE=2 SV=1	At2g44050	1	0.00269657	84.999	LLEGALNTFK(1)SYSVR	2	6.2342	8	1.434	0.642		1.102	1.019			1.07	1.188	0.881	0.664														0.705	0.95	0.923	0.998	0.935	1.123	0.926	0.852	0.91	1.097	1.179	1.015	0.903	0.932
Capana01g003736	214	K	Putative ovule protein	---	0.999933	4.64256e-06	80.026	VK(1)NVIEKPHNDHLSLLEASR	3	-6.132	16			1.186	1.311	1.201	1.27	1.148	0.916		0.854		0.878			1.096	0.826		0.579				0.871		0.865	0.872	0.895	0.881	0.909	0.947	0.964	0.979	0.969	0.911	1.053	1.008	1.004	0.927	0.91
Capana01g003736	264	K	Putative ovule protein	---	1	5.63354e-145	241.63	LLMETCQEAK(1)NLR	2	-7.656	43	1.161	1.062	0.873	1.474	1.56	1.631	0.795	0.835	0.798	0.985	0.41	0.954	1.343	1.33	1.122	1.039	0.728	1.017		0.684	0.617	0.829	0.95	0.803	0.872	0.895	0.881	0.909	0.947	0.964	0.979	0.969	0.911	1.053	1.008	1.004	0.927	0.91
Capana01g003755	813	K	BGAL_VIBC3 Beta-galactosidase OS=Vibrio cholerae serotype O1 (strain ATCC 39541 / Ogawa 395 / O395) GN=lacZ PE=3 SV=2	lacZ	1	4.91331e-15	142.08	TAATTGSDIYK(1)SQFSDK	2	3.5344	23	1.236	1.029		1.126		1.113	1.052	1.128	1.174		0.659		1.057	1.105		0.898	0.764			0.659					1.198	1.297	1.165	1.044	0.849	1.125	1.18	1.246	1.371	0.873	0.839	0.842	1.009	1.058
Capana01g003759	39	K	RL91_ARATH 60S ribosomal protein L9-1 OS=Arabidopsis thaliana GN=RPL9B PE=2 SV=3	RPL9B	1	1.50721e-42	175.43	NFK(1)HLNLDFQLIKDEETGK	3	-7.1983	17	1.515	1.279	1.654	1.345	1.142	1.063	0.981	0.998	0.823		0.583	0.692		1.126	1.079					0.595		0.695	0.741	0.688	1.169	1.094	1.116	1.112	1.11	1.097	0.939	0.941	0.934	0.966	0.892	0.918	1.042	1.03
Capana01g003759	177	K	RL91_ARATH 60S ribosomal protein L9-1 OS=Arabidopsis thaliana GN=RPL9B PE=2 SV=3	RPL9B	1	0.000641333	71.066	K(1)FLDGIYVSEK	2	-9.4027	3																	1.584					0.67		0.746	1.169	1.094	1.116	1.112	1.11	1.097	0.939	0.941	0.934	0.966	0.892	0.918	1.042	1.03
Capana01g003759	167	K	RL91_ARATH 60S ribosomal protein L9-1 OS=Arabidopsis thaliana GN=RPL9B PE=2 SV=3	RPL9B	1	0.00125571	90.142	SAALINQK(1)CHVK(1)NK	2	7.1458	6			1.367	1.435		0.958			0.596					0.644											1.169	1.094	1.116	1.112	1.11	1.097	0.939	0.941	0.934	0.966	0.892	0.918	1.042	1.03
Capana01g003759	171	K	RL91_ARATH 60S ribosomal protein L9-1 OS=Arabidopsis thaliana GN=RPL9B PE=2 SV=3	RPL9B	1	0.00125571	90.142	SAALINQK(1)CHVK(1)NK	2	7.1458	6			1.367	1.435		0.958			0.596					0.644											1.169	1.094	1.116	1.112	1.11	1.097	0.939	0.941	0.934	0.966	0.892	0.918	1.042	1.03
Capana01g003771	94	K	YCF1_SOLBU Putative membrane protein ycf1 OS=Solanum bulbocastanum GN=ycf1 PE=3 SV=1	ycf1	1	0.00698204	63.766	GNLGPVFSK(1)HQNDLEK	2	-1.9198	3																			1.255	0.745					0.671	0.715	0.917	0.756	1.053	0.998	1.231	1.278	1.155	0.579	0.737	0.659	0.902	0.698
Capana01g003799	46	K	EIF2A_CHICK Eukaryotic translation initiation factor 2A OS=Gallus gallus GN=EIF2A PE=2 SV=1	EIF2A	1	1.04437e-12	130.99	VPCTSAK(1)FSDDGSK	2	-6.6528	18		1.351	1.353	1.599	1.564	1.525	0.879	0.672	0.898		0.651	0.499	1.364	1.295	1.366	0.67		0.94	0.597			0.471	0.306		0.998	0.967	1.1	1	1.084	1.13	0.991	0.929	1.014	0.885	0.812	0.806	0.987	1.134
Capana01g003816	137	K	Putative ribosomal RNA small subunit methyltransferase G-like	---	1	0.00360026	49.16	IYGLGTGPK(1)VK	2	-7.9604	7							1.191	1.136					0.852			1.069		0.691	0.914					1.148	0.98	0.925	0.953	0.944	0.966	0.992	1.143	1.099	1.109	1.112	1.101	1.095	0.945	0.927
Capana01g003836	87	K	CDC2A_ANTMA Cell division control protein 2 homolog A OS=Antirrhinum majus GN=CDC2A PE=2 SV=2	CDC2A	1	0.014198	53.517	VTNETIALK(1)K	2	-7.7664	1																								1
Capana01g003876	444	K	MAOM_SOLTU NAD-dependent malic enzyme 62 kDa isoform, mitochondrial OS=Solanum tuberosum PE=1 SV=1	---	1	6.13734e-26	153.25	EVLEALK(1)HSTSTR	2	-2.7192	21	0.919	0.858	0.874	0.895		0.908	0.793	1.038	1.062	1.264	1.319	1.256	1.091	0.954	0.927	1.073		0.951		0.978	0.944	0.884	0.805	1.208	0.833	1	1.008	0.855	0.933	0.935	1.156	1.159	1.108	1.107	1.109	1.159	1.004	0.996
Capana01g003927	207	K	TM9S4_PONAB Transmembrane 9 superfamily member 4 OS=Pongo abelii GN=TM9SF4 PE=2 SV=1	TM9SF4	1	4.94092e-13	153.25	HEYDGK(1)WVDNTR	2	-6.7703	19	1.15	1.006	1.143	1.118	1.154	1.113		0.17	0.924	0.931	0.928	0.84	0.955		0.877	0.724	0.575	0.512				1.611	1.634	1.635	0.47	1.32	1.113	1.546	1.369	1.243	0.858	0.623		0.621	1.027	0.622	0.937	0.961
Capana01g003957	128	K	Y464_SYNE7 UPF0133 protein Synpcc7942_0464 OS=Synechococcus elongatus (strain PCC 7942) GN=Synpcc7942_0464 PE=3 SV=2	Synpcc7942_0464	1	3.55933e-16	140.57	LSLLVAEAYK(1)DAHQK	2	3.2774	13				0.337							1.207	0.91			0.193	0.43	0.728	0.399	0.965		1.02	1.958	1.748	2.104	0.501	0.631	0.681	0.772	0.773	0.804	1.116	1.056	1.032	1.347	1.324	1.228	0.778	0.784
Capana01g003958	56	K	ENL1_ARATH Early nodulin-like protein 1 OS=Arabidopsis thaliana GN=At2g25060 PE=1 SV=2	At2g25060	1	0.00389949	89.382	IPSSESDSLNHWAEK(1)R	2	3.5914	9										0.849	0.917								0.632		0.671	1.235	1.351	1.346	0.72	0.624		0.793	0.687	0.691				1.678	1.66	0.974		0.585
Capana01g003981	231	K	GPX7_ARATH Putative glutathione peroxidase 7, chloroplastic OS=Arabidopsis thaliana GN=GPX7 PE=2 SV=2	GPX7	1	3.39332e-41	150.85	YPPTTSPFQIEK(1)DIQK	2	-1.8412	23	0.83	0.714	0.612	1.012	0.987	1.019	0.92	1.41	1.27	1.749	1.508	1.522	0.617	0.465	0.574	0.588	0.569	0.612		0.91	0.961	1.433	1.349	1.369	0.904	0.5	0.76	0.833	0.875	0.834	1.287	1.126	1.149	1.089	1.32	1.394	0.852	0.663
Capana01g003981	166	K	GPX7_ARATH Putative glutathione peroxidase 7, chloroplastic OS=Arabidopsis thaliana GN=GPX7 PE=2 SV=2	GPX7	1	0.000191032	136.84	FK(1)AEFPIFDK	2	-8.3636	26	1.129	0.948	0.684	1.267	1.35	1.17	1.381	1.302	1.283	1.705	1.664	1.51	0.967	0.629	0.537	1.06	0.619	0.511	0.687	0.681	0.89	0.691	0.633	0.703	0.904	0.5	0.76	0.833	0.875	0.834	1.287	1.126	1.149	1.089	1.32	1.394	0.852	0.663
Capana01g003981	93	K	GPX7_ARATH Putative glutathione peroxidase 7, chloroplastic OS=Arabidopsis thaliana GN=GPX7 PE=2 SV=2	GPX7	1	0.000574362	99.589	DIDGK(1)DVPLNTFK	2	-7.7844	9							0.665	0.965		1.082		1.285					0.588		1.089			0.98	1.064	1.28	0.904	0.5	0.76	0.833	0.875	0.834	1.287	1.126	1.149	1.089	1.32	1.394	0.852	0.663
Capana01g003981	80	K	GPX7_ARATH Putative glutathione peroxidase 7, chloroplastic OS=Arabidopsis thaliana GN=GPX7 PE=2 SV=2	GPX7	1	0.00114034	95.138	AATEK(1)TIYDFTVK	2	-7.4796	7			0.497						1.345	1.655			0.867	0.439					1.22		0.976				0.904	0.5	0.76	0.833	0.875	0.834	1.287	1.126	1.149	1.089	1.32	1.394	0.852	0.663
Capana01g004009	279	K	MGDG_TOBAC Probable monogalactosyldiacylglycerol synthase, chloroplastic OS=Nicotiana tabacum GN=MGD A PE=2 SV=1	MGD	1	1.42121e-11	152.23	SYNFLVK(1)HGSLWR	2	-3.0375	12	1.427		1.091	1.393	1.274	1.179					0.596		0.843	0.902	1.045				0.854		0.795	0.601			1.282	1.136	1.046	1.134	1.073	1.034		1.255	1.094	0.764	0.775	0.852	1.06	0.997
Capana01g004028	137	K	FKB13_ARATH Peptidyl-prolyl cis-trans isomerase FKBP13, chloroplastic OS=Arabidopsis thaliana GN=FKBP13 PE=1 SV=2	FKBP13	1	1.22407e-20	148.76	LENGK(1)VFDSSYNR	2	-4.4277	25	0.839	0.818	0.89	0.996	1.077	1.066			0.978	1.173	1.072	1.242	0.724	0.733	0.679		0.533	0.584		0.534	0.822	1.747	1.707	1.786	1.046	1.003	0.939	0.984	0.919	0.862	1.106	1.075	1.09	1.383	1.365	1.349	0.768	0.73
Capana01g004028	132	K	FKB13_ARATH Peptidyl-prolyl cis-trans isomerase FKBP13, chloroplastic OS=Arabidopsis thaliana GN=FKBP13 PE=1 SV=2	FKBP13	1	6.78882e-05	74.849	AHYVGK(1)LENGK	2	-5.4334	4		1.28													0.691							1.028			1.046	1.003	0.939	0.984	0.919	0.862	1.106	1.075	1.09	1.383	1.365	1.349	0.768	0.73
Capana01g004028	121	K	FKB13_ARATH Peptidyl-prolyl cis-trans isomerase FKBP13, chloroplastic OS=Arabidopsis thaliana GN=FKBP13 PE=1 SV=2	FKBP13	1	0.00391568	44.82	VVGYGPEAVK(1)GQLIK	2	-3.6794	1										1															1.046	1.003	0.939	0.984	0.919	0.862	1.106	1.075	1.09	1.383	1.365	1.349	0.768	0.73
Capana01g004056	89	K	SOX_ARATH Probable sarcosine oxidase OS=Arabidopsis thaliana GN=At2g24580 PE=2 SV=1	At2g24580	1	0.00343355	72.327	VYFK(1)TSQFDCGPSDHK	2	-1.916	2						1.37							0.63												0.98	1.039	0.985	1.21	1.278	1.193	1.013	0.962	0.918	1.078	1.219	1.119	1.069	1.015
Capana01g004093	208	K	GDL8_ARATH GDSL esterase/lipase At1g28590 OS=Arabidopsis thaliana GN=At1g28590 PE=2 SV=2	At1g28590	1	0.0115233	43.306	GIK(1)DVIQQGATR	2	-9.9021	1														1											0.707	0.693	0.672	0.798	0.821	0.799	0.567	0.534	0.531	0.608	0.575	0.587	1.238	1.273
Capana01g004115	166	K	AIG2L_ARATH AIG2-like protein OS=Arabidopsis thaliana GN=At5g39720 PE=1 SV=1	At5g39720	1	4.10304e-17	150.21	VATYESFYTQEEK(1)K	2	2.9956	22	1.129	0.957	0.748	0.933			1.156	1.139	1.092	1.06	1.066	1.174	1.07	0.795	0.83	1.065	0.972	0.935	1.224	0.99	0.877	0.764	0.969	1.055	0.745	0.792	0.858	0.879	0.752	0.768	0.977	0.977	0.973	1.24	1.147	1.138	0.972	0.906
Capana01g004118	207	K	RS6_ASPOF 40S ribosomal protein S6 OS=Asparagus officinalis GN=rps6 PE=2 SV=1	rps6	1	0.0132122	69.915	AK(1)SEAADYQK	2	-7.4081	2				1.262		0.738
Capana01g004129	384	K	ATPAM_NICPL ATP synthase subunit alpha, mitochondrial OS=Nicotiana plumbaginifolia GN=ATPA PE=3 SV=1	ATPA	1	2.23318e-07	85.622	VGSAAQLK(1)TMK	2	-7.7666	3																0.256		1.361	1.383						0.738	0.862	0.887	0.87	0.921	0.941	1.006	0.958	0.94	1.074	1.06	1.069	1.056	1.031
Capana01g004129	177	K	ATPAM_NICPL ATP synthase subunit alpha, mitochondrial OS=Nicotiana plumbaginifolia GN=ATPA PE=3 SV=1	ATPA	1	1.34102e-41	190.37	QTGK(1)TAIAIDTILNQK	2	-1.4916	20	1.373	0.837	0.915	1.014	0.89	0.817	1.006	1.223	0.839	1.273		0.519	1.215	0.582		1.043	1.266	1.096			0.559	1.43	0.965	1.137	0.738	0.862	0.887	0.87	0.921	0.941	1.006	0.958	0.94	1.074	1.06	1.069	1.056	1.031
Capana01g004201	141	K	NOTUM_MOUSE Protein notum homolog OS=Mus musculus GN=Notum PE=2 SV=2	Notum	1	0.00523019	40.53	YCDGSSFTGDVEAVDPK(1)TK	2	2.7808	1						1																			1.038	0.968	0.992	1.115	1.138	1.119	0.796	0.821	0.826	0.835	0.824	0.874	1.123	1.14
Capana01g004201	386	K	NOTUM_MOUSE Protein notum homolog OS=Mus musculus GN=Notum PE=2 SV=2	Notum	1	5.15153e-96	190.37	FQEIDCPYPCNK(1)TCK	2	-1.4461	17	1.186	1.287	1.218	1.284		1.447	0.849		0.884		0.728	0.781	1.167	1.181		0.892	0.83	0.769	0.597			0.991	0.909		1.038	0.968	0.992	1.115	1.138	1.119	0.796	0.821	0.826	0.835	0.824	0.874	1.123	1.14
Capana01g004201	110	K	NOTUM_MOUSE Protein notum homolog OS=Mus musculus GN=Notum PE=2 SV=2	Notum	1	7.72851e-05	99.855	AK(1)FNPDFYNWNR	2	-4.3637	22	0.568	0.535		0.905	0.844	0.93		0.784	0.529		0.768	0.791	2.204	0.858	0.956	1.754	1.731	1.828	0.702	0.631	0.678			1.005	1.038	0.968	0.992	1.115	1.138	1.119	0.796	0.821	0.826	0.835	0.824	0.874	1.123	1.14
Capana01g004234	24	K	UAF30_YEAST Upstream activation factor subunit UAF30 OS=Saccharomyces cerevisiae (strain ATCC 204508 / S288c) GN=UAF30 PE=1 SV=1	UAF30	1	1.93762e-07	107.46	SSTEAPATAANATSAAAGK(1)GR	2	-2.9651	2																						0.731		1.269
Capana01g004236	46	K	U420_DICDI UPF0420 protein OS=Dictyostelium discoideum GN=DDB_G0277179 PE=3 SV=1	DDB_G0277179	1	0.0113813	67.507	HFDVNPK(1)SWR	2	2.1366	8	1.065		1.069		1.165						0.526				0.899	1.269		1.091			0.917				0.659	0.887	0.931	0.881	0.876	0.96	0.837	1.07	0.888	0.708	0.69	0.681	1.217	1.299
Capana01g004264	60	K	KIRO_ACTDE Kirola OS=Actinidia deliciosa PE=1 SV=1	---	1	0.000413944	87.727	IGSIVNWK(1)YNDDGSEK	2	-6.0126	17												0.368		0.796	0.788	0.911		0.844		1.019		1.436	1.456	1.381	0.402	0.409	0.353	0.359	0.349	0.327	0.41	0.425	0.417	0.521	0.539	0.516	1.33	1.36
Capana01g004264	68	K	KIRO_ACTDE Kirola OS=Actinidia deliciosa PE=1 SV=1	---	1	0.0013744	68.49	YNDDGSEK(1)DK	2	-5.9891	3																		0.413					1.175	1.412	0.402	0.409	0.353	0.359	0.349	0.327	0.41	0.425	0.417	0.521	0.539	0.516	1.33	1.36
Capana01g004281	133	K	PMTK_ARATH Probable methyltransferase PMT20 OS=Arabidopsis thaliana GN=At1g31850 PE=1 SV=1	At1g31850	1	0.00631254	67.903	SK(1)NECWYR	2	-7.0476	5			0.678		1.415	1.328										0.66							0.92		1.255	1.144	1.166	1.249	1.139	1.141	0.816	0.794	0.81	0.803	0.759	0.731	1.021	0.993
Capana01g004297	316	K	CMT2_ARATH DNA (cytosine-5)-methyltransferase CMT2 OS=Arabidopsis thaliana GN=CMT2 PE=2 SV=3	CMT2	1	1.36756e-17	140.01	ISSESNSVGGK(1)SLR	2	-6.7264	18	0.776		0.796	0.619		0.66	1.126	1.084	1.134			1.512	0.561			0.771	0.731	0.674	1.197	1.151	1.133	1.245	1.418	1.414	1.136	1.144	1.011	1.016	1.002	1.186	0.764	0.681	0.793	0.998	1.042	1.069	0.789	0.72
Capana01g004366	105	K	AB7I_ARATH Protein ABCI7, chloroplastic OS=Arabidopsis thaliana GN=ABCI7 PE=1 SV=1	ABCI7	1	0.00421095	54.584	FTDTSLIK(1)NSR	2	-9.1232	2												1.006				0.994									1.1	1.036	1.008	1.06	1.012	1.055	1.086	1.062	1.108	0.995	0.974	0.942	0.979	1.039
Capana01g004373	125	K	HCT_ARATH Hydroxycinnamoyl-Coenzyme A shikimate/quinate hydroxycinnamoyltransferase OS=Arabidopsis thaliana GN=HCT PE=2 SV=1	HCT	1	0.0142373	51.829	MMEANYPK(1)NMDDFIDYK	2	6.1127	1							1																		1.049	1.064	1.004	0.947	0.969	0.919	0.889	0.874	0.918	0.748	0.698	0.724	1.185	1.204
Capana01g004373	293	K	HCT_ARATH Hydroxycinnamoyl-Coenzyme A shikimate/quinate hydroxycinnamoyltransferase OS=Arabidopsis thaliana GN=HCT PE=2 SV=1	HCT	1	0.00283894	77.157	ENFENIK(1)MENCSR	2	1.3058	4		0.922		1.611	0.395									1.073											1.049	1.064	1.004	0.947	0.969	0.919	0.889	0.874	0.918	0.748	0.698	0.724	1.185	1.204
Capana01g004493	155	K	PSAN_ARATH Photosystem I reaction center subunit N, chloroplastic OS=Arabidopsis thaliana GN=PSAN PE=1 SV=2	PSAN	0.997393	2.00259e-140	218.58	VPFLSDDLDLECEGK(0.003)DK(0.997)YK	3	-6.5316	45	1.341	1.371	1.101	1.42	1.414	1.335	1.038	1.069	0.969	1.073	0.967	1.079	1.115	1.194	1.133	0.563	0.616	0.566	0.774	0.776	0.691	0.714		0.679	0.762	0.701	0.741	0.739	0.747	0.762	0.951	0.896	0.918	1.231	1.205	1.211	0.865	0.88
Capana01g004493	122	K	PSAN_ARATH Photosystem I reaction center subunit N, chloroplastic OS=Arabidopsis thaliana GN=PSAN PE=1 SV=2	PSAN	1	5.90115e-10	129.01	AYTVQFGTCK(1)FPENFTGCQDLAK(1)QK	3	4.5615	27	1.61	0.408	0.51	0.691	0.587		2.431	2.167	1.956	1.888	0.767	0.922	1.24	0.359	0.383	0.679	0.716	0.655	0.927	0.826	0.79	0.862	0.835	0.793	0.762	0.701	0.741	0.739	0.747	0.762	0.951	0.896	0.918	1.231	1.205	1.211	0.865	0.88
Capana01g004493	157	K	PSAN_ARATH Photosystem I reaction center subunit N, chloroplastic OS=Arabidopsis thaliana GN=PSAN PE=1 SV=2	PSAN	1	1.31462e-33	200.76	YK(1)CGSNVFWK	2	-4.719	47	1.097	1.099	0.978	1.077	1.197	1.019	0.948	0.765	0.887	1.082	1.136	1.059	1.001	1.039	1.046	0.719	0.756	0.762	0.796	0.875	0.761	1.302	1.301	1.3	0.762	0.701	0.741	0.739	0.747	0.762	0.951	0.896	0.918	1.231	1.205	1.211	0.865	0.88
Capana01g004493	135	K	PSAN_ARATH Photosystem I reaction center subunit N, chloroplastic OS=Arabidopsis thaliana GN=PSAN PE=1 SV=2	PSAN	1	6.02534e-257	297.53	FPENFTGCQDLAK(1)QK(1)K	2	5.2016	79	1.148	1.098	1.018	1.125	1.174	1.188	0.988	1.011	1.024	1.109	1.035	1.101	1.077	1.055	0.98	0.818	0.838	0.771	0.903	0.789	0.789	0.931	0.98	1.052	0.762	0.701	0.741	0.739	0.747	0.762	0.951	0.896	0.918	1.231	1.205	1.211	0.865	0.88
Capana01g004493	153	K	PSAN_ARATH Photosystem I reaction center subunit N, chloroplastic OS=Arabidopsis thaliana GN=PSAN PE=1 SV=2	PSAN	1	1.85423e-31	153.18	VPFLSDDLDLECEGK(1)DK	2	0.4089	48	0.831	0.234	0.536	0.74	0.508		1.23	1.036		1.128	1.037	0.873	1.239	1.145	0.979	1.102	1.044	0.784	0.901	1.236	0.89	1.477	1.615	1.435	0.762	0.701	0.741	0.739	0.747	0.762	0.951	0.896	0.918	1.231	1.205	1.211	0.865	0.88
Capana02g000008	50	K	RPT2_ARATH Root phototropism protein 2 OS=Arabidopsis thaliana GN=RPT2 PE=1 SV=2	RPT2	1	0.000279208	81.163	FMLVAK(1)SNHIR	2	-6.1717	13	1.137	1.145	1.088	1.242									0.897	0.942	0.909	0.892	0.748								1.247	1.153	1.254	1.119	1.107	1.235	1.167	1.064	1.078	0.555	0.636	0.644	1.308	1.363
Capana02g000014	158	K	ACCO_ACTDE 1-aminocyclopropane-1-carboxylate oxidase OS=Actinidia deliciosa GN=ACO PE=2 SV=1	ACO	0.9999	0.00464885	44.16	GPTFGTK(1)VSNYPPCPKPDLIK	3	-6.7556	1	1																								1.839	1.805	1.553	1.689	1.673	1.549	1.272	1.317	1.323	1.224	1.217	1.29	0.63	0.646
Capana02g000024	466	K	CGEP_ARATH Probable glutamyl endopeptidase, chloroplastic OS=Arabidopsis thaliana GN=GEP PE=2 SV=2	GEP	1	2.44276e-05	63.947	DIIYTQSPAPHENEQPK(1)ILHK	3	-5.2929	4		0.872			0.859	1.119	1.151																		1.155	1.132	1.059	1.017	1.038	1.02	1.197	1.198	1.213	1.072	1.044	1.055	0.951	0.952
Capana02g000024	652	K	CGEP_ARATH Probable glutamyl endopeptidase, chloroplastic OS=Arabidopsis thaliana GN=GEP PE=2 SV=2	GEP	1	0.000286851	77.431	ACQITNFPHPYPQLK(1)SLQK	3	-1.2351	12			0.955	1.121		1.171		1.113	1.141	0.772								0.727							1.155	1.132	1.059	1.017	1.038	1.02	1.197	1.198	1.213	1.072	1.044	1.055	0.951	0.952
Capana02g000024	636	K	CGEP_ARATH Probable glutamyl endopeptidase, chloroplastic OS=Arabidopsis thaliana GN=GEP PE=2 SV=2	GEP	1	2.59456e-230	277.21	TENTQYNLLSWPEK(1)K	2	5.1066	37	0.686	0.729	0.798	1.391	0.949	1.269	1.422	1.354	1.267	1.191	0.627	0.657	1.818	1.011	1.167	1.225	1.164	1.001	0.856	0.967	0.879	0.553	0.522	0.498	1.155	1.132	1.059	1.017	1.038	1.02	1.197	1.198	1.213	1.072	1.044	1.055	0.951	0.952
Capana02g000024	622	K	CGEP_ARATH Probable glutamyl endopeptidase, chloroplastic OS=Arabidopsis thaliana GN=GEP PE=2 SV=2	GEP	1	2.65514e-10	121.39	ESK(1)TENTQYNLLSWPEK	2	-2.1722	2								0.68					1.32												1.155	1.132	1.059	1.017	1.038	1.02	1.197	1.198	1.213	1.072	1.044	1.055	0.951	0.952
Capana02g000031	334	K	AMPP1_SORMK Probable Xaa-Pro aminopeptidase P OS=Sordaria macrospora (strain ATCC MYA-333 / DSM 997 / K(L3346) / K-hell) GN=AMPP PE=3 SV=1	AMPP	1	2.33797e-100	223.96	NPVEMEGLK(1)NAHIR	2	2.2911	50	1.304	1.334	1.38	1.289	1.375	1.264	1.035	1.039	1.038	0.856	0.926	0.897	1.006	1.021	1.003	0.999	0.991	0.984	0.892	1.036	0.985	0.445	0.445	0.456	1.1	0.991	1.026	1.068	1.108	1.036	0.881	0.87	0.898	0.963	0.924	0.953	1.037	1.075
Capana02g000031	503	K	AMPP1_SORMK Probable Xaa-Pro aminopeptidase P OS=Sordaria macrospora (strain ATCC MYA-333 / DSM 997 / K(L3346) / K-hell) GN=AMPP PE=3 SV=1	AMPP	1	1.13508e-08	179.95	TPLWK(1)YGLDYR	2	-7.6884	11	1.244		1.286						0.855	0.799		0.782			1.249		1.089	1.088				0.929	0.79	0.889	1.1	0.991	1.026	1.068	1.108	1.036	0.881	0.87	0.898	0.963	0.924	0.953	1.037	1.075
Capana02g000031	390	K	AMPP1_SORMK Probable Xaa-Pro aminopeptidase P OS=Sordaria macrospora (strain ATCC MYA-333 / DSM 997 / K(L3346) / K-hell) GN=AMPP PE=3 SV=1	AMPP	1	0.000414327	95.138	LTEVSASDK(1)LEEFR	2	-7.3533	3						0.861				0.94							1.199								1.1	0.991	1.026	1.068	1.108	1.036	0.881	0.87	0.898	0.963	0.924	0.953	1.037	1.075
Capana02g000053	97	K	ASPR_CUCPE Aspartic proteinase OS=Cucurbita pepo PE=2 SV=1	---	1	0.00368148	70.389	YK(1)SSQSSTYK	2	-6.7591	1																						1			0.964	0.843		0.736	0.859	0.892		0.36	0.659	0.842	0.745	0.707	0.975	1.096
Capana02g000063	93	K	RS13_SOYBN 40S ribosomal protein S13 OS=Glycine max GN=RPS13 PE=2 SV=1	RPS13	1	0.000328612	112.95	AHGLAPEIPEDLYHLIK(1)K	3	-6.9642	23	1.697	1.557	1.044	1.406	1.451	1.169	1.284	1.225	1.177	0.995	0.892	0.862	1.359	0.78	0.839	1.018	0.666		1.011	0.719	0.812	0.348	0.315	0.374
Capana02g000063	39	K	RS13_SOYBN 40S ribosomal protein S13 OS=Glycine max GN=RPS13 PE=2 SV=1	RPS13	1	9.87395e-05	112.7	ISAPDVEDNICK(1)FAK	2	4.2389	22	1.047	0.801	1.043		1.043	1.129	0.919	0.995	1.024	0.715	0.711	0.642	1.083	1.138	0.847	1.187	1.322	1.218		1.398	1.45	0.289
Capana02g000063	64	K	RS13_SOYBN 40S ribosomal protein S13 OS=Glycine max GN=RPS13 PE=2 SV=1	RPS13	1	5.37041e-110	235.6	DSHGIAQVK(1)SVTGSK	2	-7.7333	19	0.757	0.896	1.435	1.303	1.658	1.451	0.851	0.836	0.811	0.705	0.83			1.643	1.238		0.769	1.059	1.211		0.79	0.381		0.377
Capana02g000066	60	K	TKTC_SOLTU Transketolase, chloroplastic OS=Solanum tuberosum PE=2 SV=1	---	1	2.00414e-295	289.75	PADGNETAGAYK(1)VAVLK	2	2.4572	30	0.929	0.983	0.957	0.917	0.895	0.904	1.131	1.111	1.105	0.924	0.956	0.939	0.955	1.012	1.016	1.04	1.006	0.981	0.994	1.02	1.007	1.083	1.056	1.079	0.898	0.936	0.982	0.952	0.972	0.975	1.223	1.228	1.188	1.055	1.012	1.022	0.993	1.004
Capana02g000067	397	K	TKTC_SOLTU Transketolase, chloroplastic OS=Solanum tuberosum PE=2 SV=1	---	1	0.00074585	99.34	K(1)YPEEAADLK	2	-7.4877	23	0.545	0.766	0.651	0.561	1.073	1.142	1.451	1.423	1.37	1.171	0.784	1.193	1.301	1.101	1.019	1.078		0.899	0.9	0.413	0.888	1.01	1.158	1.102	0.972	0.936	0.967	0.946	1.016	1.021	1.261	1.23	1.24	1.025	1.033	1.03	0.907	0.942
Capana02g000067	294	K	TKTC_SOLTU Transketolase, chloroplastic OS=Solanum tuberosum PE=2 SV=1	---	1	0.0139089	40.372	FESLGWHVIWVK(1)NGNTGYDEIR	3	-2.8978	1								1																	0.972	0.936	0.967	0.946	1.016	1.021	1.261	1.23	1.24	1.025	1.033	1.03	0.907	0.942
Capana02g000067	370	K	TKTC_SOLTU Transketolase, chloroplastic OS=Solanum tuberosum PE=2 SV=1	---	1	1.72657e-11	115.29	NNLGWPYEPFHVPGDVK(1)THWSR	3	-5.8903	10	0.784	0.854	0.874	0.794	0.808		1.268	1.414	1.263	0.941															0.972	0.936	0.967	0.946	1.016	1.021	1.261	1.23	1.24	1.025	1.033	1.03	0.907	0.942
Capana02g000067	83	K	TKTC_SOLTU Transketolase, chloroplastic OS=Solanum tuberosum PE=2 SV=1	---	1	2.9654e-12	129.69	TDAALVEK(1)SVNTIR	2	-4.7313	23	0.836	0.855	0.75	0.892	1.02	0.695	1.389	1.28	1.317		0.782	1.115	0.956	0.957	0.92	1.057	0.902	0.909	1.033	0.973	1.027	1.057	1.206	1.072	0.972	0.936	0.967	0.946	1.016	1.021	1.261	1.23	1.24	1.025	1.033	1.03	0.907	0.942
Capana02g000067	390	K	TKTC_SOLTU Transketolase, chloroplastic OS=Solanum tuberosum PE=2 SV=1	---	1	1.62574e-05	93.026	HTSEGAALETEWNAK(1)FAEYEK	2	8.5679	9	1.111			0.893	0.929	1.011		0.936	1.12																0.972	0.936	0.967	0.946	1.016	1.021	1.261	1.23	1.24	1.025	1.033	1.03	0.907	0.942
Capana02g000067	396	K	TKTC_SOLTU Transketolase, chloroplastic OS=Solanum tuberosum PE=2 SV=1	---	1	0.0186748	51.43	FAEYEK(1)K	2	-4.0905	7					0.602		1.837					0.793			0.689	1.047		0.786				1.246			0.972	0.936	0.967	0.946	1.016	1.021	1.261	1.23	1.24	1.025	1.033	1.03	0.907	0.942
Capana02g000122	162	K	P2SAF_ARATH Photosystem II stability/assembly factor HCF136, chloroplastic OS=Arabidopsis thaliana GN=HCF136 PE=1 SV=1	HCF136	1	0.00178249	78.816	TTNGGK(1)TWIR	2	-7.908	2																							0.959	1.041	0.801	0.841	0.885	0.816	0.848	0.823	1.098	1.063	1.036	1.283	1.291	1.287	0.916	0.906
Capana02g000122	168	K	P2SAF_ARATH Photosystem II stability/assembly factor HCF136, chloroplastic OS=Arabidopsis thaliana GN=HCF136 PE=1 SV=1	HCF136	1	0.00250153	44.571	DK(1)AADNIAANLYSVK	2	-5.0947	1																							1		0.801	0.841	0.885	0.816	0.848	0.823	1.098	1.063	1.036	1.283	1.291	1.287	0.916	0.906
Capana02g000197	164	K	KPYC_SOYBN Pyruvate kinase, cytosolic isozyme OS=Glycine max PE=2 SV=1	---	1	0.00561965	73.637	VLGPHAK(1)R	2	-2.3671	16	0.974				0.764	0.713			1.046	0.627	0.692		0.908	1.051	1.095	0.682			1.213	1.203	1.108	1.453	1.214	1.256	1.021	1.16	0.963	0.969	1.08	1.001	0.97	0.929	0.967	0.933	0.911	0.867	1.084	1.115
Capana02g000204	32	K	VILI4_ARATH Villin-4 OS=Arabidopsis thaliana GN=VLN4 PE=1 SV=1	VLN4	1	0.00236895	67.887	HFSWDSTK(1)SAMHGNSFQR	3	-3.3227	3						1.134		0.939	0.926																0.816	0.903	0.977	0.885	0.964	0.917	1.03	1.108	0.784	1.248	1.15	1.327	0.96	0.891
Capana02g000272	443	K	APR3_ARATH 5'-adenylylsulfate reductase 3, chloroplastic OS=Arabidopsis thaliana GN=APR3 PE=2 SV=2	APR3	1	0.00232781	85.821	HSSQPIK(1)YPSEK	2	1.0958	11	1.445	1.453	1.591				0.685							0.974	1		0.672	0.679	0.753		0.749				1.96	2.002	1.814	1.132	1.121	1.323	0.656	0.679	0.755	0.946	0.616	0.745	1.259	0.907
Capana02g000286	49	K	YHKF_SCHPO Uncharacterized RNA-binding protein C660.15 OS=Schizosaccharomyces pombe (strain 972 / ATCC 24843) GN=SPBC660.15 PE=2 SV=1	SPBC660.15	1	0.00174474	79.235	ILETFTK(1)DQCISVLR	2	1.457	4			1.2	1.545					0.774						0.481										0.887	0.935	0.936	0.985	0.989	1.066	0.757	0.795	0.792	0.942	0.954	0.899	1.01	0.911
Capana02g000286	235	K	YHKF_SCHPO Uncharacterized RNA-binding protein C660.15 OS=Schizosaccharomyces pombe (strain 972 / ATCC 24843) GN=SPBC660.15 PE=2 SV=1	SPBC660.15	1	0.00633217	65.173	ASLLDPVK(1)TIEGHQVLCK	3	-8.5255	1						1																			0.887	0.935	0.936	0.985	0.989	1.066	0.757	0.795	0.792	0.942	0.954	0.899	1.01	0.911
Capana02g000292	39	K	CSGA_MYXXA C-factor OS=Myxococcus xanthus GN=csgA PE=1 SV=1	csgA	1	0.00692524	47.349	LK(1)NEFPER	2	5.1525	4				0.886				1.006								1.188					0.92					0.769	0.931	0.939		0.962	0.842	0.851	0.838		1.034	1.045	0.923
Capana02g000298	423	K	Y1044_ARATH BTB/POZ domain-containing protein At1g30440 OS=Arabidopsis thaliana GN=At1g30440 PE=1 SV=2	At1g30440	1	0.00372868	91.939	LPK(1)FQTLAASVPEYAR	2	2.298	7	1.49	1.051		1.118	1.003				0.91	0.657								0.771
Capana02g000308	49	K	SUCA2_SOLLC Succinyl-CoA ligase [ADP-forming] subunit alpha-2, mitochondrial OS=Solanum lycopersicum PE=1 SV=1	---	1	1.6514e-21	115.78	VICQGITGK(1)NGTFHTEQAIEYGTK	3	-5.0947	25	0.842	1.126	1.127		1.315	1.316		1.031	1.232	0.942			1.16	1.408	1.061	0.554	0.657	0.62	0.606						0.965	0.897	0.933	0.989	0.993	1.026	0.905	0.929	0.911	1.149	1.073	1.094	0.937	0.939
Capana02g000319	547	K	DPE2_ARATH 4-alpha-glucanotransferase DPE2 OS=Arabidopsis thaliana GN=DPE2 PE=1 SV=1	DPE2	1	4.25506e-11	126.29	LTQMGK(1)YFTAYR	2	-3.3811	17	0.711			1.155	0.855	1.109		0.919					1.162		1.05			1.039							1.149	1.149	1.129	1.177	1.135	1.174	1.317	1.311	1.259	0.715	0.769	0.729	1.102	1.12
Capana02g000339	444	K	DIM_PEA Delta(24)-sterol reductase OS=Pisum sativum GN=DIM PE=1 SV=1	DIM	1	0.00160061	112.95	LPLK(1)TMVYPEPGFELHR	3	-10.062	7	1.321		1.371					1.15			1.017			0.702			0.767			0.672					1.313	1.192	1.2	1.133	1.149	1.107	1.096	1.078	1.083	1.116	1.163	1.126	0.882	0.859
Capana02g000339	335	K	DIM_PEA Delta(24)-sterol reductase OS=Pisum sativum GN=DIM PE=1 SV=1	DIM	1	2.01826e-10	127.03	TWFYQHAQTALK(1)R	2	2.6456	20	1.204	1.222	1.224	1.206	1.339	1.216	1.148	1.111	1.089	1.076	1.146	1.023		0.92	0.865		0.932	0.912	0.911			0.494	0.448	0.514	1.313	1.192	1.2	1.133	1.149	1.107	1.096	1.078	1.083	1.116	1.163	1.126	0.882	0.859
Capana02g000437	547	K	ATAD3_XENTR ATPase family AAA domain-containing protein 3 OS=Xenopus tropicalis GN=atad3 PE=2 SV=1	atad3	1	4.65743e-08	127.07	YLAGEGDSNSDSNSK(1)WGHLFK	3	-1.9646	21	1.241	1.275	1.15	1.334	1.421	1.406	1.022	1.059	1.062	0.839	0.691	0.846	0.997	1.014	1.027	0.987		0.924	0.898	0.752	0.8			0.256	1.18	1.05	1.105	1.132	0.851	1.017	1	0.979	0.945	0.999	0.965	0.924	0.907	0.899
Capana02g000489	348	K	ALFC2_ARATH Probable fructose-bisphosphate aldolase 2, chloroplastic OS=Arabidopsis thaliana GN=FBA2 PE=1 SV=2	FBA2	1	1.99452e-14	153.33	YTGEGESEEAK(1)K	2	-4.1806	29	0.98	0.95	0.94	1.067	0.958	0.952	0.829	0.848	0.87	0.889	0.904	0.973	1.189	1.116	1.202	0.891	0.793	0.979	0.871	0.748		1.436	1.211	1.405	0.875	0.896	0.855	0.933	0.907	0.897	0.984	0.94	0.998	0.998	0.972	0.928	1.012	1.041
Capana02g000489	337	K	ALFC2_ARATH Probable fructose-bisphosphate aldolase 2, chloroplastic OS=Arabidopsis thaliana GN=FBA2 PE=1 SV=2	FBA2	1	0	295.61	ASANSLAQLGK(1)YTGEGESEEAK	2	5.5104	116	0.947	1.12	1.145	0.999	1.335	0.929	0.877	0.702	0.69	0.795	1.018	0.971	1.148	1.538	1.264	0.971	0.914	0.899	0.685	0.843	0.658	1.237	1.227	1.09	0.875	0.896	0.855	0.933	0.907	0.897	0.984	0.94	0.998	0.998	0.972	0.928	1.012	1.041
Capana02g000489	307	K	ALFC2_ARATH Probable fructose-bisphosphate aldolase 2, chloroplastic OS=Arabidopsis thaliana GN=FBA2 PE=1 SV=2	FBA2	1	0	362.24	ALQNTCLK(1)TWGGRPENVQAAQEALLTR	3	4.3525	75	0.691	0.766	0.831	1.286	1.155	1.131	0.589	1.155	0.798	1.325	0.804	0.927	1.78	0.891	0.958	1.208	1.203	1.18	0.771	0.715	0.74	0.984	1.074	1.042	0.875	0.896	0.855	0.933	0.907	0.897	0.984	0.94	0.998	0.998	0.972	0.928	1.012	1.041
Capana02g000490	112	K	Putative dnaJ, mitochondrial-like	---	1	0.0152944	41.499	YAGHK(1)PSVDAIEAAHDK	3	-11.844	1													1												0.907	1.059	1.018	1.026	1.003	1.005	0.98	1.123	1.053	0.944	0.992	0.871	1.061	0.985
Capana02g000490	124	K	Putative dnaJ, mitochondrial-like	---	1	0.000119599	70.831	YAGHKPSVDAIEAAHDK(1)IIMQK	4	-8.5154	5					1.125		1.085		1.001	0.831				0.959											0.907	1.059	1.018	1.026	1.003	1.005	0.98	1.123	1.053	0.944	0.992	0.871	1.061	0.985
Capana02g000490	129	K	Putative dnaJ, mitochondrial-like	---	1	0.0166808	67.507	IIMQK(1)FYDR	2	0.99023	2							1.1						0.9												0.907	1.059	1.018	1.026	1.003	1.005	0.98	1.123	1.053	0.944	0.992	0.871	1.061	0.985
Capana02g000541	149	K	RBS_CAPAN Ribulose bisphosphate carboxylase small chain, chloroplastic OS=Capsicum annuum GN=RBCS PE=2 SV=1	RBCS	1	0.00384939	101.41	K(1)AYPQAWIR	2	-7.0193	23	0.637	0.46	0.583	0.828	0.825	0.896	0.793	1.191	1.177	1.143	0.76	1.308	1.249	0.902	0.971	0.973	0.892	0.921	1.017	0.703		1.642	1.584	1.545	0.991	0.952	0.971	1.018	1.005	1.022	1.045	1.05	1.034	1.11	1.148	1.109	0.98	0.969
Capana02g000541	148	K	RBS_CAPAN Ribulose bisphosphate carboxylase small chain, chloroplastic OS=Capsicum annuum GN=RBCS PE=2 SV=1	RBCS	1	2.57312e-28	183.7	LPMFGCTDATQVLNEVQEAK(1)K	3	-3.1666	74	0.841	0.866	0.515	0.877	1.293	1.344	0.922	0.846	1.061	1.451	1.525	1.459	1.636	0.49	0.58	1.596	0.364	0.414	1.421	1.903	0.45	0.581	0.534	1.033	0.991	0.952	0.971	1.018	1.005	1.022	1.045	1.05	1.034	1.11	1.148	1.109	0.98	0.969
Capana02g000557	21	K	MGN_ORYSJ Protein mago nashi homolog OS=Oryza sativa subsp. japonica GN=Os12g0287200 PE=2 SV=2	Os12g0287200	1	0.000512982	104.86	GK(1)FGHEFLEFEFRPDGK	3	-5.7091	6	0.944	1.234		0.925					1.348					0.969							0.581				1.109	1.005	0.906	1.076	0.984	1.018	0.72	0.66	0.753	0.912	0.944	0.792	1.025	0.98
Capana02g000557	46	K	MGN_ORYSJ Protein mago nashi homolog OS=Oryza sativa subsp. japonica GN=Os12g0287200 PE=2 SV=2	Os12g0287200	1	6.01717e-47	168.05	YANNSNYK(1)NDTMIR	2	-5.0339	87	1.398	1.364	1.423	1.401	1.512	1.499	0.953	0.961	0.909	0.947	0.946	0.983	1.113	1.103	1.062	0.909	0.949	0.94	0.746	0.697	0.722	0.478	0.516	0.47	1.109	1.005	0.906	1.076	0.984	1.018	0.72	0.66	0.753	0.912	0.944	0.792	1.025	0.98
Capana02g000564	86	K	TCPZ_CAEEL T-complex protein 1 subunit zeta OS=Caenorhabditis elegans GN=cct-6 PE=1 SV=1	cct-6	1	0.000105102	108.2	GPNDHTIAQIK(1)NAVR	3	-8.4495	14			0.709		0.684		1.064		1.353			0.803			0.787	1.134	0.974	1.218	1.628	1.231	1.15	0.711		0.555
Capana02g000567	54	K	RD23C_ARATH Putative DNA repair protein RAD23-3 OS=Arabidopsis thaliana GN=RAD23-3 PE=2 SV=2	RAD23-3	1	5.99281e-05	85.821	VLK(1)DTTTLEENK	2	-6.4444	4											0.49								0.88		0.985		1.644		1.013	0.908	0.914	0.959	0.966	0.969	0.901	0.939	0.916	1.161	1.146	1.216	0.838	0.813
Capana02g000662	129	K	CSK2A_MAIZE Casein kinase II subunit alpha OS=Zea mays GN=ACK2 PE=1 SV=1	ACK2	1	0.00128045	74.62	GK(1)YSEVFEGIHTTNNEK	2	-1.6861	2														1.298									0.702		1.127	1.088	1.143	1.215	1.162	1.169	0.939	0.86	0.923	0.939	0.888	0.902	0.998	1.038
Capana02g000667	76	K	RL261_ARATH 60S ribosomal protein L26-1 OS=Arabidopsis thaliana GN=RPL26A PE=2 SV=2	RPL26A	1	2.91557e-05	133.98	K(1)WVIHIER	2	-6.5396	27	1.322	1.174	1.415	1.434	1.584	1.346	0.512	0.701	0.701	0.765	0.813	0.785	1.215	1.339	1.295	1.002	1.097	1.055	0.81	0.824	0.814	0.655	0.668	0.674	1.165	1.215	1.157	1.191	1.171	1.246	0.984	0.991	0.99	0.877	0.833	0.93	1.115	1.091
Capana02g000690	443	K	Putative ovule protein (Fragment)	---	1	1.20419e-12	151.66	NPDECEAFFLK(1)K	2	-5.6932	22	1.111	1.124	1.153	1.362	1.427	1.427	0.804	0.771	0.8	0.681	0.647	0.655	1.511	1.41	1.324		1.037	0.984	0.715	0.748	0.757	0.772		0.778	0.86	0.815	0.845	0.81	0.84	0.864	0.918	0.909	0.916	0.774	0.817	0.801	1.103	1.128
Capana02g000690	169	K	Putative ovule protein (Fragment)	---	1	0.0116985	49.058	GFICYK(1)NR	2	6.9693	10									0.873				0.79	0.353		1.935	1.405		0.645						0.86	0.815	0.845	0.81	0.84	0.864	0.918	0.909	0.916	0.774	0.817	0.801	1.103	1.128
Capana02g000690	444	K	Putative ovule protein (Fragment)	---	1	0.00289431	94.806	K(1)FQCPDMK	2	-5.8159	9							0.507	0.499						1.042	1.126				0.808	0.784		1.41	1.277	1.547	0.86	0.815	0.845	0.81	0.84	0.864	0.918	0.909	0.916	0.774	0.817	0.801	1.103	1.128
Capana02g000690	394	K	Putative ovule protein (Fragment)	---	1	0.000881273	92.428	LSHLEK(1)LTLK	2	-7.6959	14				0.872	0.974	0.898		0.781						1.104	1.181	1.179	1.116		0.866	0.823	0.921	1.087	1.058	1.14	0.86	0.815	0.845	0.81	0.84	0.864	0.918	0.909	0.916	0.774	0.817	0.801	1.103	1.128
Capana02g000741	847	K	SYLC_CAEEL Leucine--tRNA ligase OS=Caenorhabditis elegans GN=lrs-1 PE=2 SV=2	lrs-1	1	0.0170692	45.939	ANK(1)YLQDTIVSMR	2	2.6184	1																			1						1.335	1.247	1.249	1.257	1.248	1.06	1.229	1.16	1.25	0.836	0.98	0.93	0.927	1.158
Capana02g000764	149	K	PSBO_SOLLC Oxygen-evolving enhancer protein 1, chloroplastic OS=Solanum lycopersicum GN=PSBO PE=2 SV=2	PSBO	1	1.39976e-73	236.7	AEGVSK(1)NSAPEFQK(1)TK	2	9.5584	47	1.143		0.807	0.814	0.774	1.116	1.152	1.199	0.669	1.173	1.387	1.471	1.165	1.06	1.485		0.564	0.697	0.247	0.835	1.103	1.281	1.029	0.827	0.731	0.796	0.802	0.672	0.737	0.775	1.004	1.014	1.034	1.142	1.141	1.127	0.954	0.957
Capana02g000764	159	K	PSBO_SOLLC Oxygen-evolving enhancer protein 1, chloroplastic OS=Solanum lycopersicum GN=PSBO PE=2 SV=2	PSBO	1	0.00900614	66.619	NSAPEFQK(1)TK(1)LMTR	2	3.1562	3	1.197				0.984									0.819											0.731	0.796	0.802	0.672	0.737	0.775	1.004	1.014	1.034	1.142	1.141	1.127	0.954	0.957
Capana02g000764	124	K	PSBO_SOLLC Oxygen-evolving enhancer protein 1, chloroplastic OS=Solanum lycopersicum GN=PSBO PE=2 SV=2	PSBO	1	2.19898e-111	188.68	GTGTANQCPTIEGGVDSFAFK(1)PGK(1)YTAQK	3	1.7789	15	0.673	0.654	0.593				1.944	1.913	1.721	1.158									0.145			0.199			0.731	0.796	0.802	0.672	0.737	0.775	1.004	1.014	1.034	1.142	1.141	1.127	0.954	0.957
Capana02g000764	127	K	PSBO_SOLLC Oxygen-evolving enhancer protein 1, chloroplastic OS=Solanum lycopersicum GN=PSBO PE=2 SV=2	PSBO	1	0	384.57	PGK(1)YTAQK	2	-1.9281	83	0.839	0.852	0.823	0.714	0.676	0.681	1.117	1.175	1.185	1.166	1.068	1.124	0.843	0.824	0.854	0.879	0.86	0.819	1.186	1.042	1.121	1.37	1.436	1.345	0.731	0.796	0.802	0.672	0.737	0.775	1.004	1.014	1.034	1.142	1.141	1.127	0.954	0.957
Capana02g000764	273	K	PSBO_SOLLC Oxygen-evolving enhancer protein 1, chloroplastic OS=Solanum lycopersicum GN=PSBO PE=2 SV=2	PSBO	1	0	289.22	ENVK(1)NTASSTGK	2	-6.0321	72	0.889	0.714	0.722	0.551	0.649	0.475	0.316	0.419	0.36	1.143	1.248	0.979	0.983	1.441	1.219	0.649	0.862	1	1.054	1.549	0.934	2.044	1.811	1.989	0.731	0.796	0.802	0.672	0.737	0.775	1.004	1.014	1.034	1.142	1.141	1.127	0.954	0.957
Capana02g000764	97	K	PSBO_SOLLC Oxygen-evolving enhancer protein 1, chloroplastic OS=Solanum lycopersicum GN=PSBO PE=2 SV=2	PSBO	1	4.59708e-43	199.51	LTFDEIQSK(1)TYMEVK	2	-0.98433	42	1.31		1.092	1.216	1.173	1.251	0.917	1.108	0.968	0.939	1.007	1.007	1.119	0.946	0.95	0.773	0.532	0.565	0.836		0.679	1.18	1.136	1.296	0.731	0.796	0.802	0.672	0.737	0.775	1.004	1.014	1.034	1.142	1.141	1.127	0.954	0.957
Capana02g000764	143	K	PSBO_SOLLC Oxygen-evolving enhancer protein 1, chloroplastic OS=Solanum lycopersicum GN=PSBO PE=2 SV=2	PSBO	1	4.88967e-11	123.99	FCLEPTSFTVK(1)AEGVSK	2	0.32312	14		0.953		0.823	0.735			1.386		1.237	0.882			0.917		0.693	0.804		0.884	0.824	0.89	1.466	1.505		0.731	0.796	0.802	0.672	0.737	0.775	1.004	1.014	1.034	1.142	1.141	1.127	0.954	0.957
Capana02g000764	269	K	PSBO_SOLLC Oxygen-evolving enhancer protein 1, chloroplastic OS=Solanum lycopersicum GN=PSBO PE=2 SV=2	PSBO	1	8.96175e-13	118.91	GDEEELEK(1)ENVK	2	-7.0743	1																						1			0.731	0.796	0.802	0.672	0.737	0.775	1.004	1.014	1.034	1.142	1.141	1.127	0.954	0.957
Capana02g000764	103	K	PSBO_SOLLC Oxygen-evolving enhancer protein 1, chloroplastic OS=Solanum lycopersicum GN=PSBO PE=2 SV=2	PSBO	0.999954	3.33869e-21	52.288	TYMEVK(1)GTGTANQCPTIEGGVDSFAFK(0.324)PGK(0.677)YTAQK	3	12.977	1								1																	0.731	0.796	0.802	0.672	0.737	0.775	1.004	1.014	1.034	1.142	1.141	1.127	0.954	0.957
Capana02g000764	132	K	PSBO_SOLLC Oxygen-evolving enhancer protein 1, chloroplastic OS=Solanum lycopersicum GN=PSBO PE=2 SV=2	PSBO	1	1.73105e-110	221.63	YTAQK(1)FCLEPTSFTVK	2	8.2845	53	0.635		0.619	0.847	0.713	0.781	1.219	1.127	0.811	1.369	0.807	1.073	1.287	0.693	0.776	1.118	1.127	1.077	1.151	1.076	1.057	1.255	1.166	1.215	0.731	0.796	0.802	0.672	0.737	0.775	1.004	1.014	1.034	1.142	1.141	1.127	0.954	0.957
Capana02g000764	157	K	PSBO_SOLLC Oxygen-evolving enhancer protein 1, chloroplastic OS=Solanum lycopersicum GN=PSBO PE=2 SV=2	PSBO	1	1.23019e-21	161.23	NSAPEFQK(1)TK(1)LMTR	2	3.1562	55	1.069	0.462	0.394	0.454		1.071	1.29	1.236	0.787	1.656	1.318	1.51	0.787	0.433	0.786	0.636	0.541	0.622	1.179	0.79	1.215	1.815	1.623	1.326	0.731	0.796	0.802	0.672	0.737	0.775	1.004	1.014	1.034	1.142	1.141	1.127	0.954	0.957
Capana02g000772	51	K	ST14_SOLTU STS14 protein OS=Solanum tuberosum GN=STS14 PE=2 SV=1	STS14	1	3.55925e-15	117.45	AAQEFLDEHNK(1)AR	2	-6.1474	23	0.68	0.749	0.767	1.17	0.731	0.641	0.675	0.694		0.859	1.047	0.968	0.768	0.772	0.855	0.696	0.667	0.664	0.75	0.839	0.813	2.559	2.367	2.269	0.972	0.879	0.854	0.909	0.934	0.924	0.784	0.78	0.78	1.128	1.169	1.168	0.769	0.755
Capana02g000828	384	K	coilin-like	---	1	0.00398729	73.891	LYK(1)NVASETEGLTNAGK	2	3.2014	2				1.307	0.693
Capana02g000833	199	K	METB_ARATH Cystathionine gamma-synthase, chloroplastic OS=Arabidopsis thaliana GN=CGS1 PE=2 SV=3	CGS1	1	0.00732299	46.033	TSDLIDFK(1)EK	2	-9.3369	1																	1								1.051	1.075	1.069	1.128	1.124	1.142	1.095	1.083	1.093	1.048	1.011	1.011	0.974	1.012
Capana02g000833	435	K	METB_ARATH Cystathionine gamma-synthase, chloroplastic OS=Arabidopsis thaliana GN=CGS1 PE=2 SV=3	CGS1	1	0.00207478	45.654	VK(1)NVYYPGLPSHPEYHLAK	3	-8.2519	2				0.807	1.193																				1.051	1.075	1.069	1.128	1.124	1.142	1.095	1.083	1.093	1.048	1.011	1.011	0.974	1.012
Capana02g000862	127	K	CYF_ATRBE Apocytochrome f OS=Atropa belladonna GN=petA PE=3 SV=1	petA	1	0.00875686	60.589	ISPEMK(1)ER	2	-3.0948	9				0.512		1.118	1.037					1.017		0.867						0.461		1.227	1.302	1.46	0.727	0.823	0.822	0.877	0.902	0.928	1.072	1.052	1.078	1.019	0.965	0.98	0.984	0.999
Capana02g000862	142	K	CYF_ATRBE Apocytochrome f OS=Atropa belladonna GN=petA PE=3 SV=1	petA	1	2.46442e-61	162.21	IGNLSFQSYRPNK(1)K	2	-2.9395	25		0.881	0.783		0.834	0.675	0.71		0.641	0.813	1.085	0.845	0.829	1.044	0.979			0.584	0.767	1.203	1.135	1.669	1.763	1.759	0.727	0.823	0.822	0.877	0.902	0.928	1.072	1.052	1.078	1.019	0.965	0.98	0.984	0.999
Capana02g000862	178	K	CYF_ATRBE Apocytochrome f OS=Atropa belladonna GN=petA PE=3 SV=1	petA	1	1.01803e-72	204.34	DVHFLK(1)YPIYVGGNR	2	8.8779	57	0.69	0.937	0.878	1.187	0.972	0.861	0.574	0.724	0.7	0.751	0.799	0.571	0.907	0.999	1.046	1.363	1.317	1.301	1.147	0.981	0.879	1.469	1.495	1.449	0.727	0.823	0.822	0.877	0.902	0.928	1.072	1.052	1.078	1.019	0.965	0.98	0.984	0.999
Capana02g000862	91	K	CYF_ATRBE Apocytochrome f OS=Atropa belladonna GN=petA PE=3 SV=1	petA	1	3.55337e-05	108.5	IPYDMQLK(1)QVLANGK	2	0.8335	11	1.034									0.87							1.052		0.809	0.943		1.216	0.991	1.086	0.727	0.823	0.822	0.877	0.902	0.928	1.072	1.052	1.078	1.019	0.965	0.98	0.984	0.999
Capana02g000862	220	K	CYF_ATRBE Apocytochrome f OS=Atropa belladonna GN=petA PE=3 SV=1	petA	1	0.00476801	69.201	EK(1)GGYEITITDASEGR	2	-3.8992	2													1.27									0.73			0.727	0.823	0.822	0.877	0.902	0.928	1.072	1.052	1.078	1.019	0.965	0.98	0.984	0.999
Capana02g000868	326	K	AMY1_HORVU Alpha-amylase type A isozyme OS=Hordeum vulgare GN=AMY1.1 PE=1 SV=1	AMY1.1	1	0.000476223	90.689	IDFLMDDNSQK(1)WR	2	0.33608	6							1.017	0.855	1.139							0.989	1.007				0.994				1.096	1.227	0.948	1.098	0.705	0.936	1.473	1.53	1.583	0.624	0.563	0.649	0.935	0.779
Capana02g000894	259	K	Y637_PELLD UPF0301 protein Plut_0637 OS=Pelodictyon luteolum (strain DSM 273) GN=Plut_0637 PE=3 SV=1	Plut_0637	1	0.00345596	81.642	FFDGYCAWK(1)R	2	-7.5688	4				1.126	1.034	1.109				0.73															0.736	0.591	0.644	1.286	1.273	1.074	1.221	0.993	1.084	1.04	1.038	0.943	0.615	0.613
Capana02g000894	229	K	Y637_PELLD UPF0301 protein Plut_0637 OS=Pelodictyon luteolum (strain DSM 273) GN=Plut_0637 PE=3 SV=1	Plut_0637	1	0.00249199	57.279	GLYYGTK(1)ESVGCASEMVK	2	-1.9655	1																								1	0.736	0.591	0.644	1.286	1.273	1.074	1.221	0.993	1.084	1.04	1.038	0.943	0.615	0.613
Capana02g000933	21	K	VDAC1_SOLTU Mitochondrial outer membrane protein porin of 34 kDa OS=Solanum tuberosum PE=1 SV=2	---	1	5.17989e-14	153.33	DLLYK(1)DYQSDHK	2	-5.2418	23	0.852	0.888	0.953	0.859	0.838	0.761	0.951	0.891		0.874	0.934	0.91	0.912	0.929	0.939	0.941	1.003	0.985	1.047	1.113	0.919	1.481	1.525	1.495	0.827	0.793	0.771	0.814	0.862	0.829	0.891	0.911	0.876	1.158	1.102	1.119	0.871	0.87
Capana02g000933	28	K	VDAC1_SOLTU Mitochondrial outer membrane protein porin of 34 kDa OS=Solanum tuberosum PE=1 SV=2	---	1	9.06991e-27	148.89	DYQSDHK(1)FSITTYSPTGVAITSSGSK	3	1.5245	12									0.1								0.453		1.343		0.706	1.604	1.326	1.468	0.827	0.793	0.771	0.814	0.862	0.829	0.891	0.911	0.876	1.158	1.102	1.119	0.871	0.87
Capana02g000933	63	K	VDAC1_SOLTU Mitochondrial outer membrane protein porin of 34 kDa OS=Solanum tuberosum PE=1 SV=2	---	1	0.0199563	69.716	NK(1)NVTTDIK	2	-5.0642	4		0.703												0.822		0.678						1.797			0.827	0.793	0.771	0.814	0.862	0.829	0.891	0.911	0.876	1.158	1.102	1.119	0.871	0.87
Capana02g000933	228	K	VDAC1_SOLTU Mitochondrial outer membrane protein porin of 34 kDa OS=Solanum tuberosum PE=1 SV=2	---	1	0.000300359	98.009	LDPLTSVK(1)SR	2	-7.9637	7								0.772	1.048				0.645					0.727	0.649			1.696	1.463		0.827	0.793	0.771	0.814	0.862	0.829	0.891	0.911	0.876	1.158	1.102	1.119	0.871	0.87
Capana02g000933	13	K	VDAC1_SOLTU Mitochondrial outer membrane protein porin of 34 kDa OS=Solanum tuberosum PE=1 SV=2	---	1	6.19739e-05	110.58	MGK(1)GPGLYTEIGK(1)K(1)AR	2	7.1357	11				1.534				0.366		0.339				2.83						0.488	0.489		0.954		0.827	0.793	0.771	0.814	0.862	0.829	0.891	0.911	0.876	1.158	1.102	1.119	0.871	0.87
Capana02g000933	47	K	VDAC1_SOLTU Mitochondrial outer membrane protein porin of 34 kDa OS=Solanum tuberosum PE=1 SV=2	---	1	2.12626e-101	178.03	FSITTYSPTGVAITSSGSK(1)K	2	-2.6293	12						0.411		0.413	0.228	0.626		0.153	0.555	0.686	0.299		0.543					2.097	2.991	2.998	0.827	0.793	0.771	0.814	0.862	0.829	0.891	0.911	0.876	1.158	1.102	1.119	0.871	0.87
Capana02g001004	32	K	AIM32_DEBHA Altered inheritance of mitochondria protein 32 OS=Debaryomyces hansenii (strain ATCC 36239 / CBS 767 / JCM 1990 / NBRC 0083 / IGC 2968) GN=AIM32 PE=3 SV=2	AIM32	1	0.000683217	88.42	DLK(1)NEVYVTACSHVGGHK	3	-2.4684	10	1.139	1.06	1.212	1.322	1.405	1.336		0.846						0.571			0.577			0.532					1.197	1.054	1.083	1.153	1.121	1.129	1.017	1.026	1.088	0.94	0.923	0.976	0.826	0.828
Capana02g001016	81	K	GPDA_CUPLA Glycerol-3-phosphate dehydrogenase [NAD(+)] OS=Cuphea lanceolata GN=GPDH PE=2 SV=1	GPDH	1	0.000932203	110.58	LPK(1)NVVADPDIEHAVR	3	0.17913	14	1.194	1.313	1.109		1.151	1.152	0.798	0.851		0.529		0.7	1.215		1.197		1.131	0.966			0.695				0.846	1.11	1.053	1.274	1.203	1.185	0.893	0.917	0.717	0.652	0.677	0.858		1.313
Capana02g001130	103	K	SPI1_SOLTU Serine protease inhibitor 1 OS=Solanum tuberosum PE=1 SV=2	---	1	1.7783e-114	185.67	APNSDSPCPDAPFK(1)YNGEGGTSHSAIR	3	-4.1557	37	1.04	1.027	1.024	0.881	0.884	0.915	0.828	0.83	0.796	0.679		0.715	1.347	1.265	1.293	0.835		0.777	0.987		0.914	1.41	1.459	1.093	0.77	0.444	0.712	0.643	0.665	0.6	0.663	0.701	0.698	0.846	0.783	0.857	1.096	1.206
Capana02g001139	117	K	VATF_ARATH V-type proton ATPase subunit F OS=Arabidopsis thaliana GN=VHA-F PE=2 SV=1	VHA-F	1	0.000228504	78.864	VK(1)YLFSTESVASDR	2	-5.1588	8	0.559				0.702					1.008	0.841	1.092		0.654								1.491	1.654		0.965	0.94	0.911	0.971	0.957	0.969	0.833	0.86	0.855	1.222	1.23	1.238	0.895	0.891
Capana02g001146	118	K	TRXO2_ARATH Thioredoxin O2, mitochondrial OS=Arabidopsis thaliana GN=At1g31020 PE=2 SV=1	At1g31020	1	6.18815e-07	125.14	LLSPVIGQLSEK(1)YPHVTTYK	3	-9.1757	19	0.353				0.762		1.403	1.328	1.33		0.889		0.873	0.607		1.03		1.042	1.451		1.266	0.922	0.855	0.89
Capana02g001150	255	K	UAP1_ARATH Probable UDP-N-acetylglucosamine pyrophosphorylase OS=Arabidopsis thaliana GN=At2g35020 PE=2 SV=1	At2g35020	1	0.000317891	80.815	GIK(1)YVDCYGVDNALVR	2	-0.53679	5	0.849			1.124	0.995								0.993		1.038										1.275	1.04	1.04	1.216	1.201	1.075	0.942	0.751	0.897	0.85	0.741	0.852	1.026	1.097
Capana02g001187	98	K	IMPL1_ARATH Phosphatase IMPL1, chloroplastic OS=Arabidopsis thaliana GN=IMPL1 PE=1 SV=2	IMPL1	0.99996	0.00218605	54.261	VVEAAAK(1)TGAQVVMDAVNKPR	3	-3.1346	2																							0.969	1.031	0.934	0.886	0.935	0.861	0.904	0.781	1.004	1	1.023	1.175	1.224	1.129	0.888	0.872
Capana02g001187	110	K	IMPL1_ARATH Phosphatase IMPL1, chloroplastic OS=Arabidopsis thaliana GN=IMPL1 PE=1 SV=2	IMPL1	1	0.00779083	52.863	TGAQVVMDAVNK(1)PR	2	-6.1624	1																				1					0.934	0.886	0.935	0.861	0.904	0.781	1.004	1	1.023	1.175	1.224	1.129	0.888	0.872
Capana02g001195	31	K	GCSH_FLAAN Glycine cleavage system H protein, mitochondrial OS=Flaveria anomala GN=GDCSH PE=2 SV=1	GDCSH	1	0.00839762	78.864	DLK(1)YAESHEWVK	2	-4.496	3	0.892					0.915																		1.193	0.678	0.967	1.032	0.902	0.782	0.903			0.625	1.132	1.093	1.146	0.65
Capana02g001195	153	K	GCSH_FLAAN Glycine cleavage system H protein, mitochondrial OS=Flaveria anomala GN=GDCSH PE=2 SV=1	GDCSH	1	0.00326522	125.98	FCDEEDAK(1)H	2	-6.1709	24	0.995	1.005	0.993	1.175	1.09	1.144	0.77	0.708	0.711	0.99	0.939	0.981	1.007	1.013	1.036	0.813	0.773	0.611	0.91	0.896	0.884	1.443	1.556	1.556	0.678	0.967	1.032	0.902	0.782	0.903			0.625	1.132	1.093	1.146	0.65
Capana02g001258	273	K	CATB_MACFA Cathepsin B OS=Macaca fascicularis GN=CTSB PE=2 SV=1	CTSB	1	0.000113846	91.993	SGVYK(1)HVTGNYIGGHAAK	3	-6.452	4					1.019	0.943					0.955	1.083													1.812	1.702	1.624	1.836	1.761	1.52	1.339	1.415	1.469	1.559	1.867	1.906	0.235	0.244
Capana02g001264	24	K	SYLC_HUMAN Leucine--tRNA ligase, cytoplasmic OS=Homo sapiens GN=LARS PE=1 SV=2	LARS	1	0.0053098	65.879	QVHK(1)WWTEGDVFR	3	-2.3677	10	0.709					1.013				1.235						1.125	1.145				0.948	0.825			1.079	1.133	1.127	1.079	1.084	1.095	1.064	1.072	1.097	0.875	0.879	0.895	1.116	1.111
Capana02g001264	517	K	SYLC_HUMAN Leucine--tRNA ligase, cytoplasmic OS=Homo sapiens GN=LARS PE=1 SV=2	LARS	1	0.0147128	44.571	SNLLEMNQAVVYSEPEK(1)K	2	-29.135	1														1											1.079	1.133	1.127	1.079	1.084	1.095	1.064	1.072	1.097	0.875	0.879	0.895	1.116	1.111
Capana02g001264	144	K	SYLC_HUMAN Leucine--tRNA ligase, cytoplasmic OS=Homo sapiens GN=LARS PE=1 SV=2	LARS	1	0.000763683	86.243	VEAEGNQVVPGGK(1)FK	2	-10.039	9				0.908	1.101	0.917	0.996							1.017	1.06										1.079	1.133	1.127	1.079	1.084	1.095	1.064	1.072	1.097	0.875	0.879	0.895	1.116	1.111
Capana02g001264	720	K	SYLC_HUMAN Leucine--tRNA ligase, cytoplasmic OS=Homo sapiens GN=LARS PE=1 SV=2	LARS	1	0.0136873	50.834	MSK(1)STGNFR	2	-12.792	2							0.748												1.252						1.079	1.133	1.127	1.079	1.084	1.095	1.064	1.072	1.097	0.875	0.879	0.895	1.116	1.111
Capana02g001264	991	K	SYLC_HUMAN Leucine--tRNA ligase, cytoplasmic OS=Homo sapiens GN=LARS PE=1 SV=2	LARS	1	0.000109371	85.821	SDVAQQGNFK(1)QIQK	2	-7.68	4					0.873	1.155									1.031				0.941						1.079	1.133	1.127	1.079	1.084	1.095	1.064	1.072	1.097	0.875	0.879	0.895	1.116	1.111
Capana02g001265	98	K	VA726_ARATH Putative vesicle-associated membrane protein 726 OS=Arabidopsis thaliana GN=VAMP726 PE=2 SV=2	VAMP726	1	2.51161e-10	119.43	VKDDFVSK(1)YGGGK	2	-4.4199	7	0.721	0.609	1.127	1.305						1.391						1.211	0.635								1.2	1.134	1.018	1.167	1.088	1.101	0.974	0.965	0.957	0.699	0.662	0.728	1.058	1.036
Capana02g001265	171	K	VA726_ARATH Putative vesicle-associated membrane protein 726 OS=Arabidopsis thaliana GN=VAMP726 PE=2 SV=2	VAMP726	1	6.47816e-13	76.009	IELLVDK(1)TENLHHQAQDFR	3	-8.0056	6	0.954				1.012	0.89							0.947	1.07	1.126										1.2	1.134	1.018	1.167	1.088	1.101	0.974	0.965	0.957	0.699	0.662	0.728	1.058	1.036
Capana02g001274	99	K	CATB_PONAB Cathepsin B OS=Pongo abelii GN=CTSB PE=2 SV=1	CTSB	1	0.0121917	60.589	LPQK(1)FDAR	2	-4.9447	2													1.188		0.812										0.886	0.881	0.846	0.922	0.907	0.928	0.873	0.877	0.9	0.967	0.965	0.987	0.915	0.938
Capana02g001277	134	K	CATB_PONAB Cathepsin B OS=Pongo abelii GN=CTSB PE=2 SV=1	CTSB	1	0.000139211	144.47	SK(1)HYSVNAYR	2	-7.0131	12		1.102									1.143		0.716		1.922	0.771	0.974	0.676		0.51	0.532	1.364	1.122	1.167
Capana02g001322	191	K	PSAF_ARATH Photosystem I reaction center subunit III, chloroplastic OS=Arabidopsis thaliana GN=PSAF PE=1 SV=1	PSAF	0.999974	1.01204e-08	126.63	KPTMK(1)EIIIDVPLANR	2	-0.20194	14		1.189		0.736	1.339				0.866		0.721		0.873	1.241	1.325	0.78		0.792	0.817	0.901		1.236		1.184
Capana02g001322	132	K	PSAF_ARATH Photosystem I reaction center subunit III, chloroplastic OS=Arabidopsis thaliana GN=PSAF PE=1 SV=1	PSAF	1	1.84842e-40	116.4	FDNYAK(1)QGLLCGSDGLPHLIVSGDQR	3	-3.7858	12	1.399	1.139			1.133	1.364	1.196	0.852	1.293		0.606	0.779	1.333		0.365					0.542
Capana02g001322	17	K	PSAF_ARATH Photosystem I reaction center subunit III, chloroplastic OS=Arabidopsis thaliana GN=PSAF PE=1 SV=1	PSAF	0.999919	0.0138494	66.619	PISSSK(1)FSSQFTTKPR	3	-0.45769	2		0.873													1.127
Capana02g001336	274	K	COPE1_ARATH Coatomer subunit epsilon-1 OS=Arabidopsis thaliana GN=At1g30630 PE=2 SV=1	At1g30630	1	3.01159e-06	118.91	LSNPDHILVK(1)R	2	-6.4336	17	0.876	1.073	0.985	1.107		1.271			0.686		1.05		0.833	1.247	0.992	0.728	0.91		0.785	0.947	0.866		1.313	1.329	1.01	1.016	1.002	1.146	1.102	1.105	0.868	0.882	0.863	1.006	0.981	1.013	0.963	0.957
Capana02g001352	506	K	RETOL_ARATH Reticuline oxidase-like protein OS=Arabidopsis thaliana GN=At4g20830 PE=1 SV=2	At4g20830	1	0.00474501	65.313	YFK(1)NNYDR	2	4.5779	11				0.985	0.858	1.208	1.538	1.499			0.929	1.012		0.883					0.868		0.676		0.543		1.158	1.002	1.182	1.111	1.82	0.808	1.005		1.03	0.702		0.588	0.826
Capana02g001352	277	K	RETOL_ARATH Reticuline oxidase-like protein OS=Arabidopsis thaliana GN=At4g20830 PE=1 SV=2	At4g20830	1	0.00519572	79.059	LLNK(1)WQHVAHK	2	0.82493	7				1.56		1.231				0.623		0.681	1.047		1.222									0.636	1.158	1.002	1.182	1.111	1.82	0.808	1.005		1.03	0.702		0.588	0.826
Capana02g001377	55	K	RS252_ARATH 40S ribosomal protein S25-2 OS=Arabidopsis thaliana GN=RPS25B PE=2 SV=1	RPS25B	1	0.01019	79.889	VNNMVLFDK(1)ATYDK	2	-6.9552	3				1.044		0.943							1.012
Capana02g001384	58	K	RLA0_SOYBN 60S acidic ribosomal protein P0 OS=Glycine max PE=2 SV=1	---	1	7.20504e-05	101.45	GDSVVLMGK(1)NTMMK	2	-8.5448	19	0.64	0.813		0.974	0.998	0.799	0.834	0.933		1.206	0.81	1.333	1.343	0.843	0.948	0.973		0.994	1.193			0.952	1.322	1.091	0.326	0.498	0.811	0.884	0.887	0.995	0.925	0.843	0.778	1.105	1.176	1.038	1.104	0.966
Capana02g001384	107	K	RLA0_SOYBN 60S acidic ribosomal protein P0 OS=Glycine max PE=2 SV=1	---	1	0.000717582	69.716	EVSEEVAK(1)YK	2	-7.4343	17		0.831	0.747	0.984		1.329	0.892		1.279	1.155	0.771	1.328	1.151	0.939	1.138			0.633	1.05		0.739	0.953	1.081		0.326	0.498	0.811	0.884	0.887	0.995	0.925	0.843	0.778	1.105	1.176	1.038	1.104	0.966
Capana02g001438	74	K	RL321_ARATH 60S ribosomal protein L32-1 OS=Arabidopsis thaliana GN=RPL32A PE=2 SV=2	RPL32A	1	1.35789e-16	155.57	K(1)FVVHNASELEVLMMHNR	3	-8.7668	20		1.094		1.051	1.003	0.92	1.061	1.009	0.901					1.072	0.888										0.898	1.142	1.058	1.113	1.289	1.17	1.011	1.078	0.961	0.944	0.559	0.903	1.2	1.131
Capana02g001438	73	K	RL321_ARATH 60S ribosomal protein L32-1 OS=Arabidopsis thaliana GN=RPL32A PE=2 SV=2	RPL32A	1	0.00366053	82.716	HYLPNGFK(1)K	2	-5.4514	22	0.999	0.793	1.175		1.52	1.375	1.198						1.069	1.033	1.241	0.645	0.783	1.073	0.776		0.803		0.817	0.702	0.898	1.142	1.058	1.113	1.289	1.17	1.011	1.078	0.961	0.944	0.559	0.903	1.2	1.131
Capana02g001443	247	K	RS4_SOLTU 40S ribosomal protein S4 OS=Solanum tuberosum GN=RPS4 PE=2 SV=1	RPS4	1	3.05959e-17	146.37	HK(1)GSFETVHIQDALGHEFATR	4	-10.43	34	1.397	1.408		1.281		1.346	1.025	1.013	0.887	0.897	0.815		1.143	1.178	1.344	0.889	0.831	0.784	0.855	1.011	0.923		0.369	0.606	1.565	1.33	1.27	1.342	1.196	1.193	1.087	0.928	0.984	0.825	0.919	1.029	0.846	0.997
Capana02g001487	213	K	GRS17_ARATH Monothiol glutaredoxin-S17 OS=Arabidopsis thaliana GN=GRXS17 PE=2 SV=1	GRXS17	1	0.00566418	51.454	K(1)FSNWPTYPQLYCK	2	2.7776	1													1												1.152	1.068	1.002	0.962	1.03	0.978	0.848	0.842	0.869	0.894	0.934	0.922	1.105	0.962
Capana02g001498	214	K	GPMB_ECOUT Probable phosphoglycerate mutase gpmB OS=Escherichia coli (strain UTI89 / UPEC) GN=gpmB PE=3 SV=1	gpmB	1	0.000409817	101.64	SVDINNGGLCVFK(1)FNK	2	5.7463	7	1.49			1.364			0.918	0.738									0.891					0.598			1.019	1.001	0.992	1.024	1.058	1.073	1.088	1.048	1.112	0.97	0.932	0.953	0.972	0.953
Capana02g001529	4	K	FB131_ARATH F-box protein At2g40925 OS=Arabidopsis thaliana GN=At2g40925 PE=2 SV=1	At2g40925	0.990385	0.0175037	63.397	MAPK(0.99)GK(0.01)GNGK(0.999)K	2	17.164	2				1.213										0.787
Capana02g001529	10	K	FB131_ARATH F-box protein At2g40925 OS=Arabidopsis thaliana GN=At2g40925 PE=2 SV=1	At2g40925	0.999867	0.0175037	63.397	MAPK(0.957)GK(0.043)GNGK(1)K	2	17.166	2				1.213										0.787
Capana02g001555	293	K	Putative ovule protein	---	1	0.000309177	88.24	SIAHSLGLSTK(1)K	2	-7.6149	3																					0.527	1.301		1.172	0.126	0.122	0.163	0.175	0.181	0.234	0.171	0.188	0.213	0.203	0.247	0.225	1.373	1.4
Capana02g001556	387	K	KASC1_ARATH 3-oxoacyl-[acyl-carrier-protein] synthase I, chloroplastic OS=Arabidopsis thaliana GN=KAS1 PE=1 SV=2	KAS1	1	0.0125918	61.194	VFK(1)NTAGIK(1)MNATK	2	7.0557	1			1																						1.004	1.015	0.973	1.034	1.065	1.033	0.967	0.993	0.994	0.918	0.895	0.891	0.999	1.019
Capana02g001556	282	K	KASC1_ARATH 3-oxoacyl-[acyl-carrier-protein] synthase I, chloroplastic OS=Arabidopsis thaliana GN=KAS1 PE=1 SV=2	KAS1	1	0.000513989	65.408	NDDPQTASRPWDK(1)ER	3	-7.7321	15				0.968	1.075	1.36	1.225				0.871	0.884			0.991	0.823			0.953	0.87			0.991	0.99	1.004	1.015	0.973	1.034	1.065	1.033	0.967	0.993	0.994	0.918	0.895	0.891	0.999	1.019
Capana02g001556	381	K	KASC1_ARATH 3-oxoacyl-[acyl-carrier-protein] synthase I, chloroplastic OS=Arabidopsis thaliana GN=KAS1 PE=1 SV=2	KAS1	1	0.0125918	78.932	VFK(1)NTAGIK(1)MNATK	2	7.0557	5			1.435	0.953																0.612					1.004	1.015	0.973	1.034	1.065	1.033	0.967	0.993	0.994	0.918	0.895	0.891	0.999	1.019
Capana02g001558	72	K	NAD(P)-bd_dom domain-containing protein	---	1	4.41868e-06	116.13	IFVAGATGNTGK(1)R	2	-8.3753	8						0.9				0.212			0.682			0.596				0.581		1.649	1.505	1.875	1.009	0.994	0.953	0.945	0.975	0.974	1.067	1.042	1.091	0.985	0.99	0.957	0.9	0.894
Capana02g001558	284	K	NAD(P)-bd_dom domain-containing protein	---	1	0.00141057	54.584	SFK(1)ELFGSIK	2	-11.242	3											1.022					0.905				1.074					1.009	0.994	0.953	0.945	0.975	0.974	1.067	1.042	1.091	0.985	0.99	0.957	0.9	0.894
Capana02g001558	96	K	NAD(P)-bd_dom domain-containing protein	---	1	0.00406507	61.042	AK(1)STLPGQNPHLQIVK	2	-7.9904	1																								1	1.009	0.994	0.953	0.945	0.975	0.974	1.067	1.042	1.091	0.985	0.99	0.957	0.9	0.894
Capana02g001575	67	K	Putative signaling mucin HKR1-like	---	1	0.000419012	110.44	LLTQDTFHEVK(1)SK	2	-6.6794	18	1.21	1.31	1.233	1.143	0.9	1.288	0.661				1.155	1.115	0.92	1.145	0.945	0.552	0.783	0.751	0.842	0.897				1.151	1.264	1.178	1.188	1.06	1.001	0.952	0.684	0.705	0.743	1.11	1.163	1.139	0.96	0.98
Capana02g001624	138	K	PP13_TOBAC Serine/threonine-protein phosphatase PP1 isozyme 3 OS=Nicotiana tabacum GN=NPP3 PE=2 SV=1	NPP3	1	0.000482894	76.605	IYGFYDECK(1)R	2	-5.5595	13	0.911	1.046		1.195		1.585			0.982	0.751	0.687		1.346	1.051	1.005			0.938	0.849				0.653
Capana02g001645	542	K	CIA30_ARATH Probable complex I intermediate-associated protein 30 OS=Arabidopsis thaliana GN=At1g17350 PE=1 SV=2	At1g17350	1	0.000262224	86.243	ICVAALK(1)SPYACDK	2	-6.7515	11			0.817	1.123		1.176		1.117	1.226		0.994		1.113		0.834	0.622	0.912	1.067							0.82	0.897	0.891	0.862	0.897	0.884	1.118	1.147	1.164	1.046	1.023	1.051	0.971	0.944
Capana02g001645	549	K	CIA30_ARATH Probable complex I intermediate-associated protein 30 OS=Arabidopsis thaliana GN=At1g17350 PE=1 SV=2	At1g17350	1	8.08068e-13	138.71	SPYACDK(1)TFEVK	2	-3.0001	24	1.202	1.272	1.125	1.307	1.39	1.719	1.178	1.307	1.226	0.99	0.637	1.013	1.509	1.071	1.067	0.917	0.779	0.878	0.803	0.516	0.46	0.532	0.531	0.571	0.82	0.897	0.891	0.862	0.897	0.884	1.118	1.147	1.164	1.046	1.023	1.051	0.971	0.944
Capana02g001646	264	K	STLP2_ARATH SEC12-like protein 2 OS=Arabidopsis thaliana GN=STL2P PE=1 SV=4	STL2P	1	5.89673e-16	126.17	DQGGSISK(1)WNTTTWK	2	1.6895	24	1.046	0.823	0.875	1.089	1.022	1.216	0.914	0.923	0.859	1.001	0.79	0.966	1.22	1.011	1.167	1.191	1.226	1.144	0.965	0.901	0.797	1.006	0.894	0.953	0.849	0.882	0.897	1.049	1.097	1.02	0.885	0.867	0.866	0.93	0.916	0.883	1.065	1.086
Capana02g001675	433	K	HISX_ARATH Histidinol dehydrogenase, chloroplastic OS=Arabidopsis thaliana GN=HDH PE=2 SV=1	HDH	1	4.31451e-08	114.39	MAEVEGLDAHK(1)R	2	-8.6127	18		1.016	1.145	1.204		1.494	0.986		1.055	0.827			1.25		1.299		0.667	0.626		0.471			0.961		1.048	1.049	1.068	1.097	1.086	0.988	1.095	1.003	1.006	1.026	1.156	1.047	1.017	0.973
Capana02g001694	117	K	DRKD_DICDI Probable serine/threonine-protein kinase drkD OS=Dictyostelium discoideum GN=drkD PE=2 SV=1	drkD	1	0.000321027	108.5	WGSTPLGDAIHYK(1)NHHVIK	3	-1.5859	11			1.228	1.095	1.186			0.958			0.925		0.881	0.871	0.924	0.96		1.029	0.943						1.157	1.191	1.107	1.181	0.967	1.157	0.962	0.927	1.182	1.187	0.678	1.53	1.094	1.037
Capana02g001694	242	K	DRKD_DICDI Probable serine/threonine-protein kinase drkD OS=Dictyostelium discoideum GN=drkD PE=2 SV=1	drkD	1	0.000117014	132.93	GDLHAYLK(1)SEGPLRPTK	3	-7.8184	24	1.437	1.314	1.345	0.997	1.037	1.019	1.254	1.136	1.254	0.947	0.947	1.04	0.983	0.977	0.928	0.868	0.812	0.858	1.028	1.018	0.996	0.616	0.614	0.575	1.157	1.191	1.107	1.181	0.967	1.157	0.962	0.927	1.182	1.187	0.678	1.53	1.094	1.037
Capana02g001694	331	K	DRKD_DICDI Probable serine/threonine-protein kinase drkD OS=Dictyostelium discoideum GN=drkD PE=2 SV=1	drkD	1	9.83668e-05	103.76	YVAPEVFK(1)NEEYDTK	2	5.0432	28	1.918	1.459	1.945	1.434	1.338	1.318		0.91	0.998	1.039	1.025	0.26	1.026		1.001		0.996	0.956	0.921	0.881	0.826	0.288	0.266	0.196	1.157	1.191	1.107	1.181	0.967	1.157	0.962	0.927	1.182	1.187	0.678	1.53	1.094	1.037
Capana02g001753	88	K	PUR4_ARATH Probable phosphoribosylformylglycinamidine synthase, chloroplastic/mitochondrial OS=Arabidopsis thaliana GN=At1g74260 PE=1 SV=2	At1g74260	1	0.0160295	50.297	VQEVAEK(1)VIHLYR	3	-8.3054	1																1									1.154	1.06	1.058	0.945	0.941	0.925	1.258	1.251	1.28	1.125	1.102	1.124	0.896	0.929
Capana02g001753	1133	K	PUR4_ARATH Probable phosphoribosylformylglycinamidine synthase, chloroplastic/mitochondrial OS=Arabidopsis thaliana GN=At1g74260 PE=1 SV=2	At1g74260	1	0.00826436	72.327	VTDDK(1)YMTAISKPK	2	-2.4519	5					1.003			1.047			1.04				0.806					1.104					1.154	1.06	1.058	0.945	0.941	0.925	1.258	1.251	1.28	1.125	1.102	1.124	0.896	0.929
Capana02g001802	93	K	Protein trichome birefringence-like 40	---	0.999999	0.00912852	97.594	QYLK(1)YAWKPDSCNLPR	2	3.39	9	0.963	0.86		1.183				0.943					0.66		0.838	1.232	1.09	1.231							0.91	0.92	0.924	1.033	1.001	0.948	1.015	0.97	0.902	0.687	0.64	0.604	1.139	1.124
Capana02g001802	97	K	Protein trichome birefringence-like 40	---	1	0.0107851	66.664	YAWK(1)PDSCNLPR	2	-4.49	7									0.647				0.775		0.621		0.707					1.52	1.085	1.644	0.91	0.92	0.924	1.033	1.001	0.948	1.015	0.97	0.902	0.687	0.64	0.604	1.139	1.124
Capana02g001833	269	K	DSEL_ARATH Phospholipase A1-IIgamma OS=Arabidopsis thaliana GN=DSEL PE=1 SV=1	DSEL	1	0.00449091	58.916	AYGTLK(1)NLQILR	2	-1.8758	3																						0.969	1.011	1.021		0.322	0.28	0.311		0.284				0.413				0.601
Capana02g001838	333	K	GDL85_ARATH GDSL esterase/lipase At5g45950 OS=Arabidopsis thaliana GN=At5g45950 PE=2 SV=1	At5g45950	1	8.25533e-06	97.594	TK(1)FVYWDAVHPSEK	2	-2.8952	17	1.107	1.286	1.077	1.414	1.366	1.419					0.671		0.971	1.197	1.008	0.739	0.768	0.759	0.614			0.775		0.828	1.02	0.944	0.986	1.185	1.169	1.103	0.461	0.493	0.483	0.805	0.755	0.776	0.772	0.808
Capana02g001858	121	K	HAP28_HUMAN 28 kDa heat- and acid-stable phosphoprotein OS=Homo sapiens GN=PDAP1 PE=1 SV=1	PDAP1	1	2.36897e-07	90.263	LQEQGK(1)TEQAR	2	-7.447	3											1.053	0.914							1.033						1.297	1.142	1.135	1.215	1.098	0.48	0.828	0.879	0.694	1.347	1.332	1.362	0.949	1.094
Capana02g001868	28	K	H32_TOBAC Histone H3.2 OS=Nicotiana tabacum GN=B34 PE=1 SV=1	B34	1	1.87507e-05	115.05	K(1)SAPATGGVK(0.989)K(0.011)PHR	2	-6.7321	17	1.328	1.436	1.509	0.795	0.992	0.861					0.818	0.852		0.366	0.515						0.458	1.517	1.555
Capana02g001868	37	K	H32_TOBAC Histone H3.2 OS=Nicotiana tabacum GN=B34 PE=1 SV=1	B34	0.988637	1.87507e-05	115.05	K(1)SAPATGGVK(0.989)K(0.011)PHR	2	-6.9025	17	1.328	1.436	1.509	0.795	0.992	0.861					0.818	0.852		0.366	0.515						0.458	1.517	1.555
Capana02g001884	673	K	CPSF3_ARATH Cleavage and polyadenylation specificity factor subunit 3-I OS=Arabidopsis thaliana GN=CPSF73-I PE=1 SV=1	CPSF73-I	1	6.4991e-05	95.656	LTGDVECENESLK(1)ER	2	-3.8178	8			1.093		1.17	1.115	0.487		1.436			1.038	1.161						0.5						1.01	1.11	1.096	1.138	1.037	1.301	0.92	1.022	1.068	0.904	0.802	0.832	1.087	1.222
Capana02g001891	199	K	PHS1_DICDI Glycogen phosphorylase 1 OS=Dictyostelium discoideum GN=glpV PE=1 SV=3	glpV	1	0.0124565	52.863	LMDGFLK(1)NDSISLQK	2	4.5937	1																					1				1.145	0.996	0.981	0.769	0.725	0.656	1.615	1.615	1.559	0.873	0.813	0.741	0.731	0.679
Capana02g001928	72	K	RR5_SPIOL 30S ribosomal protein S5, chloroplastic OS=Spinacia oleracea GN=rps5 PE=1 SV=1	rps5	1	0.00247227	97.033	GGK(1)QLHFR	2	-4.7478	22	0.849	0.903	0.843		0.87	1.001	0.873	0.965	0.735	1.061		1.154	1.159	1.169	1.056	0.945	0.993	0.98	0.992	0.993	1.01	1.161	1.164	1.124	0.952	0.962	0.957	0.966	0.963	0.965	1.059	1.123	1.056	1.13	1.2	1.208	1.015	1.05
Capana02g001935	262	K	PEXLP_TOBAC Pistil-specific extensin-like protein OS=Nicotiana tabacum PE=2 SV=1	---	1	0.000995337	85.716	WLTTAGYHK(1)CK	2	-7.0696	14	0.808	0.711	1.158	1.164	1.365	1.27	0.471			0.824	0.888			0.749	0.782			0.771				1.361		1.678	0.937	1.091	1.027	1.018	1.122	1.209	0.719	0.662	0.704	1.262	1.294	1.22	0.849	0.88
Capana02g001944	431	K	EIF3D_ARATH Eukaryotic translation initiation factor 3 subunit D OS=Arabidopsis thaliana GN=TIF3D1 PE=1 SV=1	TIF3D1	1	7.85516e-07	123.42	GAVLATELK(1)NNANK	2	1.0731	22	0.708	0.918	0.882	0.988	0.849	0.918	1.183	1.228	1.218	1.162	0.994	1.277	0.98	0.757	0.855	1.093	1.077	1.06	1.301	1.057	1.005			0.492	1.177	1.136	1.125	1.045	1.014	0.956	1.077	1.04	1.078	1.096	1.123	1.055	0.949	0.923
Capana02g001944	510	K	EIF3D_ARATH Eukaryotic translation initiation factor 3 subunit D OS=Arabidopsis thaliana GN=TIF3D1 PE=1 SV=1	TIF3D1	1	0.00890492	47.561	LNEGK(1)YVLVK	2	-7.9612	2									1.021										0.979						1.177	1.136	1.125	1.045	1.014	0.956	1.077	1.04	1.078	1.096	1.123	1.055	0.949	0.923
Capana02g001973	544	K	SF3B2_HUMAN Splicing factor 3B subunit 2 OS=Homo sapiens GN=SF3B2 PE=1 SV=2	SF3B2	0.999173	0.00347008	58.916	K(0.999)RK(0.001)MQEK(1)DGK	2	2.7119	13				0.868			0.725		1.126	1.181		1.656	1.069			1.379	1.087		1.106	0.742	0.623		0.723	0.715	1.205	1.112	0.941	0.998	0.738	0.698	0.703	0.935	0.81	0.522	0.782	0.472	1.099	1.112
Capana02g001973	550	K	SF3B2_HUMAN Splicing factor 3B subunit 2 OS=Homo sapiens GN=SF3B2 PE=1 SV=2	SF3B2	0.999989	0.00347008	58.916	K(0.999)RK(0.001)MQEK(1)DGK	2	2.7119	13				0.868			0.725		1.126	1.181		1.656	1.069			1.379	1.087		1.106	0.742	0.623		0.723	0.715	1.205	1.112	0.941	0.998	0.738	0.698	0.703	0.935	0.81	0.522	0.782	0.472	1.099	1.112
Capana02g001978	7	K	HYES_HUMAN Epoxide hydrolase 2 OS=Homo sapiens GN=EPHX2 PE=1 SV=2	EPHX2	1	2.31821e-22	102.57	MEGIEHK(1)YVEVNGLK	2	4.0082	15	0.877						0.8	0.896					0.649	0.966	1.021							1.479		1.311	1.189	0.983	0.955	1.03	0.915	1.02	0.899	0.84	0.9	0.852	0.881	0.849	0.954	0.959
Capana02g001981	902	K	CPL1_ARATH RNA polymerase II C-terminal domain phosphatase-like 1 OS=Arabidopsis thaliana GN=CPL1 PE=1 SV=1	CPL1	1	3.00018e-16	90.689	ALVALK(1)SELGQFPHK	2	-3.8239	5	0.836		0.834																1.281	0.991			1.058		1.526	1.055		1.666	0.906				0.733		1.187		0.782
Capana02g001982	170	K	CLC1_ARATH Clathrin light chain 1 OS=Arabidopsis thaliana GN=At2g20760 PE=2 SV=1	At2g20760	1	8.5744e-13	132.44	NLNIETNK(1)TTNR	2	0.39299	22	1.374	1.403	1.286		1.27	1.117	1.057	0.933	0.895	1.244	1.199		1.125	1.13	1.216	0.764	0.279	0.599			0.268	0.871	0.974	0.998	0.978	1.007	1.111	0.783	0.83	0.711	0.89	0.863	0.775	1.559	1.534	1.46	0.849	0.923
Capana02g001982	248	K	CLC1_ARATH Clathrin light chain 1 OS=Arabidopsis thaliana GN=At2g20760 PE=2 SV=1	At2g20760	1	0.0197823	61.494	HILLK(1)LK	2	-3.5722	1																								1	0.978	1.007	1.111	0.783	0.83	0.711	0.89	0.863	0.775	1.559	1.534	1.46	0.849	0.923
Capana02g001982	250	K	CLC1_ARATH Clathrin light chain 1 OS=Arabidopsis thaliana GN=At2g20760 PE=2 SV=1	At2g20760	1	0.00031298	111.38	LK(1)HTPPPHMIPPPPAPAK	3	-8.098	15	1.011	0.863		0.604					0.679	1.318	1.307	1.491		0.617		0.68			0.998	0.801	0.856	1.333	1.213	1.231	0.978	1.007	1.111	0.783	0.83	0.711	0.89	0.863	0.775	1.559	1.534	1.46	0.849	0.923
Capana02g001982	186	K	CLC1_ARATH Clathrin light chain 1 OS=Arabidopsis thaliana GN=At2g20760 PE=2 SV=1	At2g20760	1	1.95679e-07	99.855	LYLTNQEK(1)FHK	2	0.42901	43	1.112	1.181	1.099	0.883	0.817	0.757	0.844	0.837	0.888	1.219	1.357	1.188	0.794		0.861	0.905	0.972	0.948	1.14	1.265	1.229	0.913	0.901	0.891	0.978	1.007	1.111	0.783	0.83	0.711	0.89	0.863	0.775	1.559	1.534	1.46	0.849	0.923
Capana02g002036	183	K	EIF3J_XENLA Eukaryotic translation initiation factor 3 subunit J OS=Xenopus laevis GN=eif3j PE=2 SV=1	eif3j	1	0.001893	75.5	LRPYEK(1)SYHYIGLLK	3	-7.4829	2										1.052		0.948													1.273	1.091	1.108	0.808	0.896	0.794	0.983	0.995	1.016	1.204	1.173	1.2	0.871	0.903
Capana02g002050	350	K	HNRL1_HUMAN Heterogeneous nuclear ribonucleoprotein U-like protein 1 OS=Homo sapiens GN=HNRNPUL1 PE=1 SV=2	HNRNPUL1	1	0.00462383	73.655	NFIIDQTNVYK(1)NAR	2	1.8073	6			0.93	1.165				0.979	0.932				0.778						1.216
Capana02g002093	180	K	MYRS_QUEIL Myrcene synthase, chloroplastic OS=Quercus ilex PE=1 SV=1	---	1	0.00355314	52.201	K(1)K(1)MDENLAEQVSHALEMPLHWR	4	-6.3826	8			1.008								1.127	1.936	1.57					1.022				0.446	0.425	0.466
Capana02g002093	179	K	MYRS_QUEIL Myrcene synthase, chloroplastic OS=Quercus ilex PE=1 SV=1	---	1	0.00355314	52.201	K(1)K(1)MDENLAEQVSHALEMPLHWR	4	-6.3826	8			1.008								1.127	1.936	1.57					1.022				0.446	0.425	0.466
Capana02g002100	66	K	DAG_ANTMA DAG protein, chloroplastic OS=Antirrhinum majus GN=DAG PE=2 SV=1	DAG	1	0.0101106	64.064	AISDGEYSSK(1)R	2	-6.069	2				0.914																		1.086			1.09	1.106	0.965	1.161	1.123	1.066	0.843	0.901	0.836	0.948	1.007	1.106	0.944	0.894
Capana02g002133	191	K	PSBQ2_ARATH Oxygen-evolving enhancer protein 3-2, chloroplastic OS=Arabidopsis thaliana GN=PSBQ2 PE=1 SV=2	PSBQ2	1	0.000185162	123.5	LQDLTGK(1)LFK	2	-9.7992	23	0.445	0.491	0.473	0.705	0.639	0.713	0.516	0.938	0.626	1.669	1.112	1.137	0.911	0.649	0.78	0.829	0.748		1.007	0.964	0.948	2.101	2.3	2.299	0.589	0.673	0.752	0.795	0.795	0.774	1.008	1.092	0.957	1.221	1.224	1.615	0.792	0.829
Capana02g002133	116	K	PSBQ2_ARATH Oxygen-evolving enhancer protein 3-2, chloroplastic OS=Arabidopsis thaliana GN=PSBQ2 PE=1 SV=2	PSBQ2	1	0.00436559	75.243	DFSLPLK(1)NR	2	0.92326	30	0.598	0.551			0.578	0.752	0.66	0.746	1.02				1.281		0.553	0.871	0.79	0.864				2.205	1.868	1.663	0.589	0.673	0.752	0.795	0.795	0.774	1.008	1.092	0.957	1.221	1.224	1.615	0.792	0.829
Capana02g002133	204	K	PSBQ2_ARATH Oxygen-evolving enhancer protein 3-2, chloroplastic OS=Arabidopsis thaliana GN=PSBQ2 PE=1 SV=2	PSBQ2	1	3.92721e-34	219.89	TISDLDHAAK(1)TK	2	-3.2939	24	0.451	0.433	0.424	0.392	0.428	0.401	1.122	1.084	1.093	1.412	1.449	1.417	0.439	0.445	0.474	0.562	0.53	0.58	1.391	1.504	1.424	2.224	2.238	2.086	0.589	0.673	0.752	0.795	0.795	0.774	1.008	1.092	0.957	1.221	1.224	1.615	0.792	0.829
Capana02g002133	194	K	PSBQ2_ARATH Oxygen-evolving enhancer protein 3-2, chloroplastic OS=Arabidopsis thaliana GN=PSBQ2 PE=1 SV=2	PSBQ2	1	6.45745e-29	151.66	LFK(1)TISDLDHAAK	2	-0.76225	48	0.802	0.796	0.759	0.965	0.896	0.928	1.05	1.045	0.949	1.372	1.329	1.206	0.623	0.662	0.765	0.638	0.612	0.482	0.873	0.858	0.904	1.867	1.754	1.864	0.589	0.673	0.752	0.795	0.795	0.774	1.008	1.092	0.957	1.221	1.224	1.615	0.792	0.829
Capana02g002133	144	K	PSBQ2_ARATH Oxygen-evolving enhancer protein 3-2, chloroplastic OS=Arabidopsis thaliana GN=PSBQ2 PE=1 SV=2	PSBQ2	1	0.000653442	108.4	EIVGVK(1)DFIDK	2	-13.175	10	0.536		0.521							1.054	1.031					0.48			0.858				1.786	1.733	0.589	0.673	0.752	0.795	0.795	0.774	1.008	1.092	0.957	1.221	1.224	1.615	0.792	0.829
Capana02g002133	177	K	PSBQ2_ARATH Oxygen-evolving enhancer protein 3-2, chloroplastic OS=Arabidopsis thaliana GN=PSBQ2 PE=1 SV=2	PSBQ2	1	0.0173224	81.642	TVISAK(1)PK	1	-3.864	1																							1		0.589	0.673	0.752	0.795	0.795	0.774	1.008	1.092	0.957	1.221	1.224	1.615	0.792	0.829
Capana02g002133	138	K	PSBQ2_ARATH Oxygen-evolving enhancer protein 3-2, chloroplastic OS=Arabidopsis thaliana GN=PSBQ2 PE=1 SV=2	PSBQ2	0.999952	0.000270361	121.71	VKDSAK(1)EIVGVK	2	-7.8041	8			0.63								1.29				0.639			0.45	0.935		1.003	1.519	1.534		0.589	0.673	0.752	0.795	0.795	0.774	1.008	1.092	0.957	1.221	1.224	1.615	0.792	0.829
Capana02g002133	171	K	PSBQ2_ARATH Oxygen-evolving enhancer protein 3-2, chloroplastic OS=Arabidopsis thaliana GN=PSBQ2 PE=1 SV=2	PSBQ2	1	7.64235e-10	96.946	YDLK(1)TVISAK	2	-7.5364	27	0.408			0.485		0.464	0.699	1.005	1.009	0.947	0.78	1.104				0.611			0.967		0.852	1.874	1.952	1.843	0.589	0.673	0.752	0.795	0.795	0.774	1.008	1.092	0.957	1.221	1.224	1.615	0.792	0.829
Capana02g002149	9	K	CXXS1_ARATH Thioredoxin-like protein CXXS1 OS=Arabidopsis thaliana GN=CXXS1 PE=2 SV=2	CXXS1	1	2.44142e-07	78.816	MEVQEQGTK(1)SR	2	-6.3569	11		0.536			0.682					0.959		1.188	0.839	0.915									1.609	1.273					0.518	0.724		1.235	1.141		1.606
Capana02g002158	431	K	PME1_FICPW Pectinesterase/pectinesterase inhibitor OS=Ficus pumila var. awkeotsang PE=1 SV=1	---	1	1.92662e-05	86.729	TLYYGEYMNK(1)GPGAGTSNR	2	3.8168	5									0.873					1.002						1.034				1.091
Capana02g002161	518	K	PME18_ARATH Pectinesterase/pectinesterase inhibitor 18 OS=Arabidopsis thaliana GN=PME18 PE=1 SV=3	PME18	1	3.74452e-15	117.45	GYHVITK(1)ASEAIK	2	-6.3262	16			0.975		0.678	0.867	0.789		0.682	0.872	1.115		0.913	1.045	1.103		0.845		0.704	0.889		1.507	1.48	1.535	1.094	0.921	0.91	0.808	0.794	0.773	0.931	0.919	0.958	1.23	1.315	1.18	0.906	0.897
Capana02g002161	511	K	PME18_ARATH Pectinesterase/pectinesterase inhibitor 18 OS=Arabidopsis thaliana GN=PME18 PE=1 SV=3	PME18	1	2.53649e-06	83.438	VNWK(1)GYHVITK	2	-8.4907	5											0.951		0.595									1.108	1.132	1.214	1.094	0.921	0.91	0.808	0.794	0.773	0.931	0.919	0.958	1.23	1.315	1.18	0.906	0.897
Capana02g002193	152	K	ATPG_TOBAC ATP synthase gamma chain, chloroplastic OS=Nicotiana tabacum GN=ATPC PE=1 SV=1	ATPC	1	2.46362e-06	123.5	GLCGGFNNYILK(1)K	2	2.138	41	0.594	1.523		0.763	0.743	0.762	0.712	1.194	1.309	1.177	0.763	0.95	1.274	0.887	0.878	1.179	1.283	1.174	1.114	1.083	1.096	0.783	0.759		0.798	0.842	0.883	0.846	0.833	0.849	1.283	1.211	1.274	1.254	1.313	1.356	0.961	0.916
Capana02g002193	72	K	ATPG_TOBAC ATP synthase gamma chain, chloroplastic OS=Nicotiana tabacum GN=ATPC PE=1 SV=1	ATPC	1	0.000573237	82.437	IDSVK(1)NTQK(1)ITEAMK	2	3.3003	18	1.182		1.263	1.234	1.288	1.357		1.005	1.046	1.106	0.715		0.866	0.669	0.868	0.887	0.864	0.879		0.771					0.798	0.842	0.883	0.846	0.833	0.849	1.283	1.211	1.274	1.254	1.313	1.356	0.961	0.916
Capana02g002193	68	K	ATPG_TOBAC ATP synthase gamma chain, chloroplastic OS=Nicotiana tabacum GN=ATPC PE=1 SV=1	ATPC	1	2.44294e-62	208.03	IDSVK(1)NTQK(1)ITEAMK	2	3.3003	65	1.178	0.871	1.107	1.067	1.179	1.162	1.11	1.254	1.286	1.231	1.166	1.027	0.98	0.876	0.918	0.921	0.913	0.888	0.804	0.987	0.803	0.742	0.765	0.766	0.798	0.842	0.883	0.846	0.833	0.849	1.283	1.211	1.274	1.254	1.313	1.356	0.961	0.916
Capana02g002193	347	K	ATPG_TOBAC ATP synthase gamma chain, chloroplastic OS=Nicotiana tabacum GN=ATPC PE=1 SV=1	ATPC	1	1.72749e-231	301.59	MSAMSSATDNASELK(1)K	2	0.55581	180	0.417	0.455	0.549	0.943	0.706	0.989	1.226	1.298	1.368	1.14	0.975	1.194	0.824	0.8	0.749	1.107	0.945	1.045	1.168	1.003	0.974	1.356	1.361	1.409	0.798	0.842	0.883	0.846	0.833	0.849	1.283	1.211	1.274	1.254	1.313	1.356	0.961	0.916
Capana02g002196	548	K	SSY3_SOLTU Soluble starch synthase 3, chloroplastic/amyloplastic OS=Solanum tuberosum GN=SS3 PE=1 SV=1	SS3	1	0.00398805	75.474	LYYNK(1)TSGPLSHAK	2	-5.7728	14	1	1.068		0.923		0.631	1.134	1.076	1.185		0.797	0.696			0.707		1.456				1.326				1.153	1.064	1.017	0.815	0.804	0.771	1.4	1.441	1.416	0.934	0.91	0.931	0.837	0.87
Capana02g002196	949	K	SSY3_SOLTU Soluble starch synthase 3, chloroplastic/amyloplastic OS=Solanum tuberosum GN=SS3 PE=1 SV=1	SS3	1	0.00300901	75.243	HYGLSK(1)SR	2	-3.5643	6	1.084	1.003	1.232											0.888	0.912				0.88						1.153	1.064	1.017	0.815	0.804	0.771	1.4	1.441	1.416	0.934	0.91	0.931	0.837	0.87
Capana02g002196	975	K	SSY3_SOLTU Soluble starch synthase 3, chloroplastic/amyloplastic OS=Solanum tuberosum GN=SS3 PE=1 SV=1	SS3	1	1.30685e-07	94.507	AMTFADK(1)ATTVSPTYSR	2	-0.92918	8		0.954	1.092				1.408		0.76					0.753		0.479			1.41	1.145					1.153	1.064	1.017	0.815	0.804	0.771	1.4	1.441	1.416	0.934	0.91	0.931	0.837	0.87
Capana02g002196	943	K	SSY3_SOLTU Soluble starch synthase 3, chloroplastic/amyloplastic OS=Solanum tuberosum GN=SS3 PE=1 SV=1	SS3	1	0.00306347	87.942	EQYK(1)HYGLSK	2	-6.3708	6		1.079	1.185					1.061				0.681	0.968	1.027											1.153	1.064	1.017	0.815	0.804	0.771	1.4	1.441	1.416	0.934	0.91	0.931	0.837	0.87
Capana02g002196	1033	K	SSY3_SOLTU Soluble starch synthase 3, chloroplastic/amyloplastic OS=Solanum tuberosum GN=SS3 PE=1 SV=1	SS3	1	0.00111064	76.196	FIPISYTSENVVEGK(1)SAAK	2	4.11	10	0.9		0.958	0.776	0.786	0.673	1.26					0.871				1.22		1.141	1.414						1.153	1.064	1.017	0.815	0.804	0.771	1.4	1.441	1.416	0.934	0.91	0.931	0.837	0.87
Capana02g002206	63	K	LGUL_ORYSJ Lactoylglutathione lyase OS=Oryza sativa subsp. japonica GN=GLX-I PE=1 SV=2	GLX-I	1	2.80215e-05	90.306	TIK(1)FYTECFGMK	2	-9.0907	16			0.541		1.016	1.034	0.803			1.297	0.865		1.496	0.835	0.976	0.977	0.915	1.109	0.728		0.555	1.399	1.455		0.844	0.811	0.773	0.837	0.85	0.881	0.835	0.796	0.786	1.051	1.112	1.076	0.896	0.876
Capana02g002206	72	K	LGUL_ORYSJ Lactoylglutathione lyase OS=Oryza sativa subsp. japonica GN=GLX-I PE=1 SV=2	GLX-I	1	0.000643679	76.572	FYTECFGMK(1)VLR	2	-4.8033	10	1.474		1.191		1.223			1.204	1.017	0.553					0.741		0.857					0.95	0.79		0.844	0.811	0.773	0.837	0.85	0.881	0.835	0.796	0.786	1.051	1.112	1.076	0.896	0.876
Capana02g002206	213	K	LGUL_ORYSJ Lactoylglutathione lyase OS=Oryza sativa subsp. japonica GN=GLX-I PE=1 SV=2	GLX-I	0.999575	9.27211e-45	143.25	KVDRPEQK(1)YTIAMMGYAPEK	3	-7.5479	40	0.766	0.763	0.737	0.739	0.864	0.786	0.828	0.848	0.855	1.221			0.779	0.739	0.689	0.759	0.828	0.816	1.301	1.364	1.411	1.607	1.677	1.622	0.844	0.811	0.773	0.837	0.85	0.881	0.835	0.796	0.786	1.051	1.112	1.076	0.896	0.876
Capana02g002207	161	K	APR3_ARATH 5'-adenylylsulfate reductase 3, chloroplastic OS=Arabidopsis thaliana GN=APR3 PE=2 SV=2	APR3	1	9.52399e-05	70.806	LNPETYQLFDAVEK(1)HYGIR	3	-2.7201	10	1.722			1.094		0.95						0.854	0.863			0.679			0.838						1.288	1.274	1.307	0.932	0.906	0.944	0.946	1.015	0.97	0.73	0.71	0.692	1.108	1.029
Capana02g002219	387	K	GCST_SOLTU Aminomethyltransferase, mitochondrial OS=Solanum tuberosum GN=GDCST PE=2 SV=1	GDCST	1	0.00362458	78.932	GK(1)SYDGAVTK	2	-4.2645	10	0.765					1.565	1.575				0.857	0.981		1.43						0.62	1.075	0.428	0.702		1.035	1.013	0.982	0.973	0.987	0.987	1.247	1.193	1.27	0.944	0.943	0.864	0.944	0.947
Capana02g002219	370	K	GCST_SOLTU Aminomethyltransferase, mitochondrial OS=Solanum tuberosum GN=GDCST PE=2 SV=1	GDCST	1	1.78588e-151	244.45	NIAMGYVK(1)SGNHK	2	0.46218	171	1.068	0.935	1.272	1.301	1.098	1.093	1.353	1.333	1.393	0.791	0.874	0.886	1.087	0.996	0.999	0.724	0.851	0.929	1.097	0.969	0.872	0.592	0.754	0.732	1.035	1.013	0.982	0.973	0.987	0.987	1.247	1.193	1.27	0.944	0.943	0.864	0.944	0.947
Capana02g002219	361	K	GCST_SOLTU Aminomethyltransferase, mitochondrial OS=Solanum tuberosum GN=GDCST PE=2 SV=1	GDCST	1	3.16164e-238	275.19	SHSEIQNSNGQSIGEITSGGFSPCLK(1)K	3	-4.6589	54	1.146	0.96	1.256	1.14	1.262	1.211	1.624	1.599	1.542	0.621	0.395	0.56	1.246	1.03	0.896	0.999	0.853	0.883	0.878	0.898	0.676	0.832	0.602	0.893	1.035	1.013	0.982	0.973	0.987	0.987	1.247	1.193	1.27	0.944	0.943	0.864	0.944	0.947
Capana02g002219	168	K	GCST_SOLTU Aminomethyltransferase, mitochondrial OS=Solanum tuberosum GN=GDCST PE=2 SV=1	GDCST	1	8.66842e-18	141.87	SK(1)GGDVSWHIHDER	2	-3.7994	48	1.011	0.957	0.971		0.927	0.963	1.259	1.165	1.089	0.85	0.835	0.859	1.041	0.964	0.975	0.987	0.899	0.94	1.12	1.083	1.04	1.027	1.033	1.006	1.035	1.013	0.982	0.973	0.987	0.987	1.247	1.193	1.27	0.944	0.943	0.864	0.944	0.947
Capana02g002219	153	K	GCST_SOLTU Aminomethyltransferase, mitochondrial OS=Solanum tuberosum GN=GDCST PE=2 SV=1	GDCST	1	3.05076e-20	176.97	DK(1)DLAHIEEHMK	2	-6.267	84	1.022	0.984	0.978	1.356	1.49	1.126	1.196	1.173	1.182	0.815	0.661	0.777	1.25	1.169	1.23	0.953	0.875	0.992	0.95	1.012	1.048	0.564	0.612	0.584	1.035	1.013	0.982	0.973	0.987	0.987	1.247	1.193	1.27	0.944	0.943	0.864	0.944	0.947
Capana02g002219	163	K	GCST_SOLTU Aminomethyltransferase, mitochondrial OS=Solanum tuberosum GN=GDCST PE=2 SV=1	GDCST	1	1.989e-82	200.9	DLAHIEEHMK(1)FFK	3	-7.2553	106	1.254	1.254	1.261	1.323	1.286	1.283	1.11	1.173	1.16	0.691	0.645	0.677	1.171	1.175	1.186	0.901	0.894	0.884	0.896	0.901	0.893	0.645	0.681	0.657	1.035	1.013	0.982	0.973	0.987	0.987	1.247	1.193	1.27	0.944	0.943	0.864	0.944	0.947
Capana02g002219	92	K	GCST_SOLTU Aminomethyltransferase, mitochondrial OS=Solanum tuberosum GN=GDCST PE=2 SV=1	GDCST	1	0.000625867	40.53	ENGSLFDVSHMCGLSLK(1)GK	3	-8.5112	1							1																		1.035	1.013	0.982	0.973	0.987	0.987	1.247	1.193	1.27	0.944	0.943	0.864	0.944	0.947
Capana02g002219	362	K	GCST_SOLTU Aminomethyltransferase, mitochondrial OS=Solanum tuberosum GN=GDCST PE=2 SV=1	GDCST	1	0.000289565	92.707	K(1)NIAMGYVK(1)SGNHK	2	10.328	15		1.124					1.392	1.37	1.233	0.572		0.619	0.787						0.904						1.035	1.013	0.982	0.973	0.987	0.987	1.247	1.193	1.27	0.944	0.943	0.864	0.944	0.947
Capana02g002219	375	K	GCST_SOLTU Aminomethyltransferase, mitochondrial OS=Solanum tuberosum GN=GDCST PE=2 SV=1	GDCST	1	0.00533463	67.548	SGNHK(1)AGTNVK	2	-6.9327	3													1.151										0.799	1.05	1.035	1.013	0.982	0.973	0.987	0.987	1.247	1.193	1.27	0.944	0.943	0.864	0.944	0.947
Capana02g002219	321	K	GCST_SOLTU Aminomethyltransferase, mitochondrial OS=Solanum tuberosum GN=GDCST PE=2 SV=1	GDCST	1	0.0113177	74.486	QIEEGPK(1)IR	2	-4.9019	8									1.482								1.424	0.818	0.926		0.46	1.04	1.007	0.843	1.035	1.013	0.982	0.973	0.987	0.987	1.247	1.193	1.27	0.944	0.943	0.864	0.944	0.947
Capana02g002219	37	K	GCST_SOLTU Aminomethyltransferase, mitochondrial OS=Solanum tuberosum GN=GDCST PE=2 SV=1	GDCST	1	3.66953e-07	137.58	K(1)TVLYDFHVVNGGK	2	-5.424	34			0.536	0.792			1.189	0.928	0.924	0.72	0.793	0.817	1.023	1.199	1.074	0.905	1.008	1.071	0.972	1.093	1.172	1.417		1.366	1.035	1.013	0.982	0.973	0.987	0.987	1.247	1.193	1.27	0.944	0.943	0.864	0.944	0.947
Capana02g002229	132	K	ASPR_CUCPE Aspartic proteinase OS=Cucurbita pepo PE=2 SV=1	---	1	0.00206622	57.293	YK(1)SSQSSTYEK	2	-6.031	2														1.541	0.459										0.707	0.732	0.784	0.756	0.75	0.779	0.976	0.982	0.995	0.624	0.678	0.71	1.176	1.221
Capana02g002246	487	K	SYL_SALRD Leucine--tRNA ligase OS=Salinibacter ruber (strain DSM 13855 / M31) GN=leuS PE=3 SV=1	leuS	1	0.0111142	46.358	FMDPK(1)NSSVLVDK	2	-8.4016	2	1.1	0.9																							1.182	1.122	1.089	1.223	1.125	1.18	1.162	1.184	1.193	0.868	0.883	0.857	1.068	1.085
Capana02g002246	647	K	SYL_SALRD Leucine--tRNA ligase OS=Salinibacter ruber (strain DSM 13855 / M31) GN=leuS PE=3 SV=1	leuS	1	0.00932605	46.768	DSK(1)TWNTSGIDGVHR	2	-1.5166	1					1																				1.182	1.122	1.089	1.223	1.125	1.18	1.162	1.184	1.193	0.868	0.883	0.857	1.068	1.085
Capana02g002247	89	K	SYL_SALRD Leucine--tRNA ligase OS=Salinibacter ruber (strain DSM 13855 / M31) GN=leuS PE=3 SV=1	leuS	1	2.16328e-10	146.34	AYPFHEIEPK(1)WQHYWEENK	3	-2.7214	19	1.349	1.289	1.27	1.316	1.388	1.386	1.113	1.304	1.215	0.721	0.664	0.714	0.999	0.853	0.875	0.603		0.644		0.665	0.634				0.958	0.904	0.979	1.091	1.113	1.066	1.21	1.112	1.107	0.946	0.953	0.933	1.059	0.726
Capana02g002247	78	K	SYL_SALRD Leucine--tRNA ligase OS=Salinibacter ruber (strain DSM 13855 / M31) GN=leuS PE=3 SV=1	leuS	1	1.15594e-34	191.24	TNEQLQQQQVK(1)K	2	0.62988	36	1.275		1.255	1.179	1.263	1.156	1.125	0.803	1.086	0.913	0.724	1.022	1.186	1.162	1.32	0.834	0.937	0.88	0.792	1.038		0.752		0.298	0.958	0.904	0.979	1.091	1.113	1.066	1.21	1.112	1.107	0.946	0.953	0.933	1.059	0.726
Capana02g002252	104	K	Chaperonin-like RBCX protein	---	1	0.00809272	51.829	NSLNDGDK(1)FCADLMR	2	-2.5865	1																						1			0.834	0.682			0.447	0.79	1.278	0.997	1.235	0.819	1.046	0.958	0.841
Capana02g002258	181	K	UBAX1_ARATH UBA and UBX domain-containing protein At4g15410 OS=Arabidopsis thaliana GN=At4g15410 PE=2 SV=1	At4g15410	1	3.41018e-06	108.4	RDENCPEPAK(1)R	2	-7.1529	2							0.733												1.267						1.1	1.057	0.975	1.114	0.948	0.935	0.837	0.831	0.873	1.085	1.164	1.171	0.828	0.851
Capana02g002260	269	K	PFPB_SOLTU Pyrophosphate--fructose 6-phosphate 1-phosphotransferase subunit beta OS=Solanum tuberosum PE=1 SV=2	---	1	0.000164767	131.22	STGK(1)YYHFVR	2	-7.8898	17	1.153	1.179		1.196	1.278	1.279	0.64		0.61	0.691			1.192	1.06	1.264	1.014		0.969	0.732	0.84		0.93		0.972	1.117	1.01	1.028	1.106	1.142	1.081	0.773	0.749	0.773	0.923	0.931	0.914	1.024	1.021
Capana02g002260	229	K	PFPB_SOLTU Pyrophosphate--fructose 6-phosphate 1-phosphotransferase subunit beta OS=Solanum tuberosum PE=1 SV=2	---	1	0.00191317	94.791	VIGCPK(1)TIDGDLK	2	-6.8988	7	0.843	0.875		1.229	0.973	1.133							0.994		0.955										1.117	1.01	1.028	1.106	1.142	1.081	0.773	0.749	0.773	0.923	0.931	0.914	1.024	1.021
Capana02g002260	435	K	PFPB_SOLTU Pyrophosphate--fructose 6-phosphate 1-phosphotransferase subunit beta OS=Solanum tuberosum PE=1 SV=2	---	1	3.77823e-05	101.43	GAYNAQFK(1)GQSHFFGYEGR	3	-6.9494	19	0.937			1.103		1.139	0.822	0.94	0.887	0.828		0.871	1.294	1.055	1.252	1.002	1.001	0.897	0.963	0.747		1.115	1.128	1.019	1.117	1.01	1.028	1.106	1.142	1.081	0.773	0.749	0.773	0.923	0.931	0.914	1.024	1.021
Capana02g002264	231	K	ACCO_ACTDE 1-aminocyclopropane-1-carboxylate oxidase OS=Actinidia deliciosa GN=ACO PE=2 SV=1	ACO	1	9.48679e-05	125.5	YK(1)SVEHR	2	-2.8424	22	1.157	1.308	1.216	0.871	1.107	1.08	0.954	1.099	1.259	0.757	0.912	0.768	1.117	1.098		0.749	0.852	0.925	0.846		0.936	0.837	1.092	1.06	1.036	1.023	1.05	0.9	0.886	0.974	1.089	1.057	1.066	0.933	0.876	0.889	1.136	1.165
Capana02g002264	159	K	ACCO_ACTDE 1-aminocyclopropane-1-carboxylate oxidase OS=Actinidia deliciosa GN=ACO PE=2 SV=1	ACO	1	5.36535e-14	164.28	GPTFGTK(1)VSNYPPCPKPELIK	3	-7.0857	24	1.481	1.463	1.469	1.388	1.321	1.379		1.064	1.006	0.556	0.497	0.561	1.546	1.454	1.396	0.916	0.855	0.817	0.759	0.696	0.73	0.323		0.324	1.036	1.023	1.05	0.9	0.886	0.974	1.089	1.057	1.066	0.933	0.876	0.889	1.136	1.165
Capana02g002264	168	K	ACCO_ACTDE 1-aminocyclopropane-1-carboxylate oxidase OS=Actinidia deliciosa GN=ACO PE=2 SV=1	ACO	1	0.00048417	87.573	VSNYPPCPK(1)PELIK	2	-5.4265	22	1.07	0.886	1.09		0.844	0.975	1.207	1.23	1.272	0.632	0.622		1.338	1.135	1.073	1.092	1.118	1.027	1.045	0.99	1.096	0.806	0.708	0.744	1.036	1.023	1.05	0.9	0.886	0.974	1.089	1.057	1.066	0.933	0.876	0.889	1.136	1.165
Capana02g002265	746	K	TTC1_MOUSE Tetratricopeptide repeat protein 1 OS=Mus musculus GN=Ttc1 PE=2 SV=1	Ttc1	1	1.30916e-14	59.689	LAGASESDISTVLK(1)NHCSNEGAAEGSK	3	2.4564	8	1.254	1.254	1.153	1.1	1.014								0.677		0.549										1.076	1.186	1.159	0.99	1.01	1.038	1.329	1.271	1.156	0.843	0.781	0.833	0.96	0.895
Capana02g002324	445	K	TFC5_YEAST Transcription factor TFIIIB component B'' OS=Saccharomyces cerevisiae (strain ATCC 204508 / S288c) GN=BDP1 PE=1 SV=1	BDP1	0.943939	0.0108646	75.474	SK(0.944)K(0.056)TAEASDQVANKK	2	-27.315	1						1
Capana02g002325	24	K	EPC2_XENTR Enhancer of polycomb homolog 2 OS=Xenopus tropicalis GN=epc2 PE=2 SV=1	epc2	1	0.000382132	49.097	SIK(1)DFEDDDSQTNTR	2	-5.0536	1																1
Capana02g002357	19	K	TOP1_RICFE DNA topoisomerase 1 OS=Rickettsia felis (strain ATCC VR-1525 / URRWXCal2) GN=topA PE=3 SV=1	topA	0.999956	0.00396762	69.224	AIADKGTVGAK(1)IVSDGNK(1)PFFK	3	7.5272	12					1.023	1.045		0.721	0.819		0.714		1.131	1.07			1.154		1.073		0.992	1.182		1.076
Capana02g002357	26	K	TOP1_RICFE DNA topoisomerase 1 OS=Rickettsia felis (strain ATCC VR-1525 / URRWXCal2) GN=topA PE=3 SV=1	topA	0.999996	0.00396762	69.224	AIADKGTVGAK(1)IVSDGNK(1)PFFK	3	7.3068	12					1.023	1.045		0.721	0.819		0.714		1.131	1.07			1.154		1.073		0.992	1.182		1.076
Capana02g002385	225	K	PsbP domain-containing protein	---	1	2.28335e-09	135.13	AFIAGATAPESK(1)WTNEGLK	2	4.0597	7	0.741		0.74							1.227		1.76							0.586			0.855		1.091	1.04	1.194	1.122	0.902	1.03	1.097	1.416	1.406	1.417	1.597	1.741	1.482	0.621	0.541
Capana02g002393	283	K	MCM6_BOVIN DNA replication licensing factor MCM6 OS=Bos taurus GN=MCM6 PE=2 SV=1	MCM6	1	0.00270712	73.655	NASGGQEGVK(1)GLR	2	-6.1694	4		0.907			1.083							1.684					0.326								1.014	1.106	1.08	1.122	1.111	1.154				1.296	1.175	1.149	0.607	0.669
Capana02g002403	104	K	TRXB2_ARATH Thioredoxin reductase 2 OS=Arabidopsis thaliana GN=NTR2 PE=2 SV=2	NTR2	1	0.0161514	48.785	SPFK(1)LVSDDR	2	-6.9436	1													1												0.949	1.045	1.019	1.038	1.04	1.032	0.951	0.972	0.968	1.168	1.099	1.123	0.901	0.864
Capana02g002403	179	K	TRXB2_ARATH Thioredoxin reductase 2 OS=Arabidopsis thaliana GN=NTR2 PE=2 SV=2	NTR2	1	0.000650942	80.175	NKPLAVIGGGDSAMEEANFLTK(1)YGSK	3	-2.3412	1																							1		0.949	1.045	1.019	1.038	1.04	1.032	0.951	0.972	0.968	1.168	1.099	1.123	0.901	0.864
Capana02g002452	127	K	CATA2_SOLLC Catalase isozyme 2 OS=Solanum lycopersicum GN=CAT2 PE=2 SV=1	CAT2	1	0.00130994	110.91	HAENYPIPTTVCSGK(1)R	3	-6.306	15				0.61	0.725		0.57	0.797	0.665						0.508			0.924	0.698		2.285		2.603	0.617	1.126	1.116	1.139	1.03	1.051	1.042	1.085	1.131	1.148	0.754	0.803	0.782	1.133	1.153
Capana02g002463	119	K	SERC_ARATH Phosphoserine aminotransferase, chloroplastic OS=Arabidopsis thaliana GN=At4g35630 PE=2 SV=1	At4g35630	1	0.0187941	75.243	CPVEK(1)SVR	2	-2.3883	1						1																			0.68	0.846	0.969	1.034	1.033	1.041	0.906	0.905	0.912	1.009	0.989	0.972	1.018	0.961
Capana02g002463	153	K	SERC_ARATH Phosphoserine aminotransferase, chloroplastic OS=Arabidopsis thaliana GN=At4g35630 PE=2 SV=1	At4g35630	1	5.6009e-174	228.13	TAAGEEMVQLK(1)GHR	2	-5.964	31	1.006	0.962	1.038	0.905	0.955	0.86	0.842	0.785	0.839	0.892	0.921	0.934	0.84	0.881	0.882	0.952	0.921	0.956	0.886	0.874	0.829	1.709	1.616	1.713	0.68	0.846	0.969	1.034	1.033	1.041	0.906	0.905	0.912	1.009	0.989	0.972	1.018	0.961
Capana02g002513	131	K	Amino_oxidase domain-containing protein	---	1	0.0106279	62.271	K(1)FYSGAQVYYGGR	2	-12.726	1			1																						0.98	1.026	0.975	1.056	0.97	0.983	0.999	1.008	1.032	0.918	0.961	0.94	1.055	1.027
Capana02g002513	428	K	Amino_oxidase domain-containing protein	---	1	0.00415677	66.619	IK(1)FAQPNQCPPTNLK	2	-6.4767	2													1.205										0.795		0.98	1.026	0.975	1.056	0.97	0.983	0.999	1.008	1.032	0.918	0.961	0.94	1.055	1.027
Capana02g002515	124	K	P4HA1_RAT Prolyl 4-hydroxylase subunit alpha-1 OS=Rattus norvegicus GN=P4ha1 PE=2 SV=2	P4ha1	1	0.000839656	45.183	SSVVDSSTGK(1)SMDSR	2	-7.1201	2																						0.911	1.089		1.028	0.974	0.939	1.053	0.983	1	0.888	0.91	0.919	0.907	0.913	0.865	1.04	1.036
Capana02g002522	804	K	PLDD1_ARATH Phospholipase D delta OS=Arabidopsis thaliana GN=PLDDELTA PE=1 SV=2	PLDDELTA	1	1.28733e-48	195.49	YTAENFSQLQGHLLK(1)YPIHVGADGK	3	1.3011	26	1.237	1.508	1.361	1.275	1.404	1.338	1.157		1.317		0.598	0.729	1.029	1.022	1.001	0.898	0.828	0.797	0.767	0.741	0.762	0.231			1.151	1.065	1.055	1.082	1.1	1.058	1.047	1.106	1.08	0.992	0.971	0.947	1.051	1.042
Capana02g002522	788	K	PLDD1_ARATH Phospholipase D delta OS=Arabidopsis thaliana GN=PLDDELTA PE=1 SV=2	PLDDELTA	1	0.00239575	94.804	VNEVAEENWK(1)R	2	-0.07402	3			0.949		1.157																			0.894	1.151	1.065	1.055	1.082	1.1	1.058	1.047	1.106	1.08	0.992	0.971	0.947	1.051	1.042
Capana02g002524	340	K	HT1_ARATH Serine/threonine-protein kinase HT1 OS=Arabidopsis thaliana GN=HT1 PE=1 SV=1	HT1	1	0.0177692	57.032	GSIYTFLHK(1)QR	2	-8.0168	1					1																				1.247	1.099	1.088	0.902	1.091	1.056	1.02	0.968	0.994	1.259	1.111	1.092	1.099	1.003
Capana02g002526	143	K	DIN1_RAPSA Senescence-associated protein DIN1 OS=Raphanus sativus GN=DIN1 PE=2 SV=1	DIN1	1	4.63322e-09	117.3	DDEIIVGCQLGK(1)R	2	-6.3742	24	1.037	0.648	0.675	1.277	1.11	1.203	1.155	1.342	1.282	0.948	0.804	1.276	1.417	1.047	1.127	0.983	0.922	0.807	0.783	0.594	0.52	1.076	0.998	0.968	0.881	0.785	0.787	0.92	0.938	0.957	1.083	1.078	1.114	1.32	1.294	1.309	0.953	0.986
Capana02g002533	33	K	U548_ARATH UPF0548 protein At2g17695 OS=Arabidopsis thaliana GN=At2g17695 PE=2 SV=1	At2g17695	1	0.000151051	95.656	GATEKPAPLLK(1)QDK	2	-6.762	1																							1		0.798	0.858	0.941	0.985	1.034	0.983	1.108	1.16			0.773		1.064	1.031
Capana02g002533	179	K	U548_ARATH UPF0548 protein At2g17695 OS=Arabidopsis thaliana GN=At2g17695 PE=2 SV=1	At2g17695	1	0.00543767	90.306	QK(1)YFAHHSGNAVK	2	-1.14	5									1.367										1.894			0.505	0.64	0.593	0.798	0.858	0.941	0.985	1.034	0.983	1.108	1.16			0.773		1.064	1.031
Capana02g002554	304	K	AROB_THISH 3-dehydroquinate synthase OS=Thioalkalivibrio sp. (strain HL-EbGR7) GN=aroB PE=3 SV=1	aroB	1	1.22562e-152	256.7	SCENK(1)AEVVSQDEK	2	-5.3337	23		1.27	1.251	1.092	1.217	1.024	0.807	0.803	0.867	0.959	0.991	0.996	1.294	1.333	1.411	0.792	0.807	0.901	0.874	0.935	0.889	0.846	0.836	0.806	0.983	0.917	0.871	0.934	0.957	0.928	0.879	0.927	0.911	0.924	0.856	0.872	1.079	1.107
Capana02g002557	65	K	APX3_ARATH L-ascorbate peroxidase 3, peroxisomal OS=Arabidopsis thaliana GN=APX3 PE=1 SV=1	APX3	1	0.000414327	78.864	NEVEYK(1)HAANNGLK	2	-7.2339	4				1.095		1.312																0.637		0.956
Capana02g002564	847	K	MA2B1_CAVPO Lysosomal alpha-mannosidase OS=Cavia porcellus GN=MAN2B1 PE=1 SV=1	MAN2B1	1	4.24329e-05	110.58	GNYYMGIHK(1)NGDGSR	2	0.9557	18	0.651	0.712		0.473			0.549	0.736	0.734				1.15	1.134	0.856	1.318		1.374	1.135	1.379	1.118	1.363		1.318	0.727	0.679	0.631	0.604	0.605	0.604	0.656	0.718	0.724	0.564	0.554	0.581	1.394	1.4
Capana02g002576	64	K	HEXP_LEIMA DNA-binding protein HEXBP OS=Leishmania major GN=HEXBP PE=4 SV=1	HEXBP	1	0.00243505	42.072	GDK(1)YQAIDVTGPDGAPLSNGR	2	2.7126	1																					1				0.86	0.95			0.973	0.893	0.653	0.434		0.971		0.89
Capana02g002576	14	K	HEXP_LEIMA DNA-binding protein HEXBP OS=Leishmania major GN=HEXBP PE=4 SV=1	HEXBP	1	1.29654e-10	139.02	MTGTVSK(1)FNNQK	2	1.7741	35	1.019	0.86	0.857		1.285	1.205	0.77	0.763	0.798	1.081	1.055	1.125	1.073			1.212	1.201			1.108	1.156	1.126	0.105	1.201	0.86	0.95			0.973	0.893	0.653	0.434		0.971		0.89
Capana02g002577	83	K	FENR1_TOBAC Ferredoxin--NADP reductase, leaf-type isozyme, chloroplastic OS=Nicotiana tabacum GN=PETH PE=2 SV=1	PETH	1	0.000287007	174.8	PK(1)EPYIGR	2	-4.6302	28		1.194	1.064	1.296	1.202	1.14	0.806	0.826	0.81	0.911	0.98	0.949	1.096	1.203	1.166		0.871	0.836	0.799	0.847	0.796	1.089	1.078	1.041	0.794	0.819	0.825	0.827	0.867	0.856	1.02	1.035	1.028	1.021	1.022	1.048	0.945	0.929
Capana02g002577	194	K	FENR1_TOBAC Ferredoxin--NADP reductase, leaf-type isozyme, chloroplastic OS=Nicotiana tabacum GN=PETH PE=2 SV=1	PETH	0.998306	3.3768e-06	71.471	GVCSNFLCDLK(0.002)PGADVK(0.998)ITGPVGK	3	-5.6602	6							1.297		1.302		0.73		1.185									0.837		0.649	0.794	0.819	0.825	0.827	0.867	0.856	1.02	1.035	1.028	1.021	1.022	1.048	0.945	0.929
Capana02g002577	70	K	FENR1_TOBAC Ferredoxin--NADP reductase, leaf-type isozyme, chloroplastic OS=Nicotiana tabacum GN=PETH PE=2 SV=1	PETH	1	3.27797e-16	141.44	K(1)QDEGVVVNK(1)FRPK	2	9.1526	32	1.114	1.351	1.363	1.241	1.433	1.388	1.091	0.861	1.027	0.789	1.127	0.934	0.89	1.035	1.055	0.919		0.959	0.75	0.884			0.315	0.476	0.794	0.819	0.825	0.827	0.867	0.856	1.02	1.035	1.028	1.021	1.022	1.048	0.945	0.929
Capana02g002577	139	K	FENR1_TOBAC Ferredoxin--NADP reductase, leaf-type isozyme, chloroplastic OS=Nicotiana tabacum GN=PETH PE=2 SV=1	PETH	0.999871	4.13745e-34	191.98	EGQSIGVIADGVDANGKPHK(1)LR	3	-3.883	50	0.646	0.516	0.485	0.318	0.389	0.37	0.543	0.628	0.839	1.454	1.324	1.497	0.565	1.055	0.707	0.484	0.637	0.656	1.481	1.106	0.87	2.383	2.533	2.514	0.794	0.819	0.825	0.827	0.867	0.856	1.02	1.035	1.028	1.021	1.022	1.048	0.945	0.929
Capana02g002577	188	K	FENR1_TOBAC Ferredoxin--NADP reductase, leaf-type isozyme, chloroplastic OS=Nicotiana tabacum GN=PETH PE=2 SV=1	PETH	1	4.92607e-41	195.36	GVCSNFLCDLK(1)PGADVK	2	2.823	28			0.457	0.532	0.487	0.471	0.979	1.048	0.968	1.31	0.652	0.589	1.017	0.374	0.567	1.061	0.982	0.849	0.79	0.842	0.68	2.719	2.348	2.275	0.794	0.819	0.825	0.827	0.867	0.856	1.02	1.035	1.028	1.021	1.022	1.048	0.945	0.929
Capana02g002577	236	K	FENR1_TOBAC Ferredoxin--NADP reductase, leaf-type isozyme, chloroplastic OS=Nicotiana tabacum GN=PETH PE=2 SV=1	PETH	1	0.000184407	120.65	MFFEK(1)HDDYK	2	-5.8295	53	0.916	0.9	0.886	1.064	1.126	1.091	0.987	0.973	0.951	0.962	0.932	1.02	0.985	0.993	1.052	1.002	0.97	0.888	0.83	0.859	0.809	1.253	1.276	1.275	0.794	0.819	0.825	0.827	0.867	0.856	1.02	1.035	1.028	1.021	1.022	1.048	0.945	0.929
Capana02g002577	79	K	FENR1_TOBAC Ferredoxin--NADP reductase, leaf-type isozyme, chloroplastic OS=Nicotiana tabacum GN=PETH PE=2 SV=1	PETH	1	1.35568e-246	304.18	QDEGVVVNK(1)FRPK	2	1.4083	363	1.024	1.045	0.956	0.894	0.777	0.852	0.986	0.939	0.97	1.041	1.044	1.02	0.963	0.997	0.984	1.149	1.178	1.101	1.036	1.013	0.993	1.059	0.99	0.99	0.794	0.819	0.825	0.827	0.867	0.856	1.02	1.035	1.028	1.021	1.022	1.048	0.945	0.929
Capana02g002577	348	K	FENR1_TOBAC Ferredoxin--NADP reductase, leaf-type isozyme, chloroplastic OS=Nicotiana tabacum GN=PETH PE=2 SV=1	PETH	1	0.000152524	154.35	EGIDWADYK(1)K	2	-8.2644	17	0.539			0.891		1.046	0.77	1.006	1.19	1.168		1.289	1.386			1.064		0.905	0.984	0.793	0.729	1.166	0.995	1.079	0.794	0.819	0.825	0.827	0.867	0.856	1.02	1.035	1.028	1.021	1.022	1.048	0.945	0.929
Capana02g002577	172	K	FENR1_TOBAC Ferredoxin--NADP reductase, leaf-type isozyme, chloroplastic OS=Nicotiana tabacum GN=PETH PE=2 SV=1	PETH	1	1.24387e-07	129.28	LVYTNDK(1)GEEVK	2	-5.9894	19	0.947	0.837		1.047	1.019	1.018	1.014	1.02	0.986		0.383		1.206	1.187		1.006	0.938	0.058	0.955	1.103		1.222	1.427	1.625	0.794	0.819	0.825	0.827	0.867	0.856	1.02	1.035	1.028	1.021	1.022	1.048	0.945	0.929
Capana02g002577	201	K	FENR1_TOBAC Ferredoxin--NADP reductase, leaf-type isozyme, chloroplastic OS=Nicotiana tabacum GN=PETH PE=2 SV=1	PETH	1	0.00678485	71.896	ITGPVGK(1)EMLMPK	2	-7.8541	14			0.654	0.737			1.009	0.917	1.023	0.913	1.11		0.83	0.808		0.972	1.057				1.028	1.438	1.504		0.794	0.819	0.825	0.827	0.867	0.856	1.02	1.035	1.028	1.021	1.022	1.048	0.945	0.929
Capana02g002577	312	K	FENR1_TOBAC Ferredoxin--NADP reductase, leaf-type isozyme, chloroplastic OS=Nicotiana tabacum GN=PETH PE=2 SV=1	PETH	1	4.12572e-07	79.889	K(1)DNTFVYMCGLK	2	-2.1236	5		0.674																		0.776	0.712	1.32	1.518		0.794	0.819	0.825	0.827	0.867	0.856	1.02	1.035	1.028	1.021	1.022	1.048	0.945	0.929
Capana02g002577	136	K	FENR1_TOBAC Ferredoxin--NADP reductase, leaf-type isozyme, chloroplastic OS=Nicotiana tabacum GN=PETH PE=2 SV=1	PETH	0.996012	1.64876e-05	112.68	EGQSIGVIADGVDANGK(0.996)PHK(0.004)LR	3	0.38923	24	0.819	0.83	0.849	0.814	0.719	0.806	1.151	1.112	1.166	1.028	1.035	1.108	1.039	0.961	0.945	0.854	0.812	0.821	1.068	1.11	1.061	1.307	1.286	1.299	0.794	0.819	0.825	0.827	0.867	0.856	1.02	1.035	1.028	1.021	1.022	1.048	0.945	0.929
Capana02g002577	292	K	FENR1_TOBAC Ferredoxin--NADP reductase, leaf-type isozyme, chloroplastic OS=Nicotiana tabacum GN=PETH PE=2 SV=1	PETH	1	0.014894	65.404	GEK(1)MYIQTR	2	16.973	6							0.844	1.823	1.337	1.227			0.485										0.284		0.794	0.819	0.825	0.827	0.867	0.856	1.02	1.035	1.028	1.021	1.022	1.048	0.945	0.929
Capana02g002577	164	K	FENR1_TOBAC Ferredoxin--NADP reductase, leaf-type isozyme, chloroplastic OS=Nicotiana tabacum GN=PETH PE=2 SV=1	PETH	1	0.00460136	82.716	TVSLCVK(1)R	2	-5.2474	14		0.789	0.55	0.904	0.542		0.788	1.057	0.367	1.33		1.124	0.883						0.827		0.393	2.583	1.863		0.794	0.819	0.825	0.827	0.867	0.856	1.02	1.035	1.028	1.021	1.022	1.048	0.945	0.929
Capana02g002621	370	K	ALFC2_ARATH Probable fructose-bisphosphate aldolase 2, chloroplastic OS=Arabidopsis thaliana GN=FBA2 PE=1 SV=2	FBA2	1	0	307.89	ANSLAQLGK(1)YTGEGESDEAK	2	3.4397	180	0.916	0.88	0.89	0.901	0.908	0.933	1.037	1.065	1.088	0.997	0.954	1.032	1.027	0.913	0.968	1.073	1.013	0.992	1.124	1.066	1.029	1.096	1.067	1.033	0.708	0.776	0.899	0.912	0.929	0.919	1.045	1.038	0.96	1.031	1.057	0.972	0.947	1.035
Capana02g002621	276	K	ALFC2_ARATH Probable fructose-bisphosphate aldolase 2, chloroplastic OS=Arabidopsis thaliana GN=FBA2 PE=1 SV=2	FBA2	1	0.000287884	92.707	PSMVTPGAECK(1)EK	2	-12.498	4										0.783			0.867	0.953										1.397	0.708	0.776	0.899	0.912	0.929	0.919	1.045	1.038	0.96	1.031	1.057	0.972	0.947	1.035
Capana02g002621	381	K	ALFC2_ARATH Probable fructose-bisphosphate aldolase 2, chloroplastic OS=Arabidopsis thaliana GN=FBA2 PE=1 SV=2	FBA2	1	3.58375e-20	179.31	YTGEGESDEAK(1)K	2	-5.0141	24	1.138	0.865	1.126	1.207	1.157	1.131	0.945	0.911	0.86	0.86	0.726	0.975	1.064	1.163	1.175	0.942	0.845	0.944	0.936	0.659	0.725	1.257	1.11	1.28	0.708	0.776	0.899	0.912	0.929	0.919	1.045	1.038	0.96	1.031	1.057	0.972	0.947	1.035
Capana02g002621	58	K	ALFC2_ARATH Probable fructose-bisphosphate aldolase 2, chloroplastic OS=Arabidopsis thaliana GN=FBA2 PE=1 SV=2	FBA2	1	0.000248855	115.86	TAK(1)TIASPGR	2	-6.5894	12								0.8	0.809			0.941		0.71		0.737	0.878		0.922	0.8	0.57	1.415	1.687	1.731	0.708	0.776	0.899	0.912	0.929	0.919	1.045	1.038	0.96	1.031	1.057	0.972	0.947	1.035
Capana02g002621	361	K	ALFC2_ARATH Probable fructose-bisphosphate aldolase 2, chloroplastic OS=Arabidopsis thaliana GN=FBA2 PE=1 SV=2	FBA2	1	1.96546e-09	102.1	AK(1)ANSLAQLGK(1)YTGEGESDEAK	2	7.7848	30	0.987			1.088	1.125	0.924		1.176	1.215	1.13	1.324	1.044	0.872		1.117	0.958		1.363		0.963	0.697	0.565	0.452		0.708	0.776	0.899	0.912	0.929	0.919	1.045	1.038	0.96	1.031	1.057	0.972	0.947	1.035
Capana02g002621	79	K	ALFC2_ARATH Probable fructose-bisphosphate aldolase 2, chloroplastic OS=Arabidopsis thaliana GN=FBA2 PE=1 SV=2	FBA2	1	4.29495e-284	273.75	GILAMDESNATCGK(1)R	2	2.1581	114	0.4	0.432	0.503	0.584	0.739	0.701	0.801	1.449	1.388	1.224	0.928	1.32	1.308	1.027	0.722	1.061	0.978	0.922	1.179	1.152	1.103	1.307	1.383	1.386	0.708	0.776	0.899	0.912	0.929	0.919	1.045	1.038	0.96	1.031	1.057	0.972	0.947	1.035
Capana02g002621	340	K	ALFC2_ARATH Probable fructose-bisphosphate aldolase 2, chloroplastic OS=Arabidopsis thaliana GN=FBA2 PE=1 SV=2	FBA2	1	0	275.23	ALQNTCLK(1)TWSGRPENVK	3	-6.0821	61	0.831	0.859	0.788	1.094	1.111		1.03	1.187	1.136	1.048	0.836	1.12	1.137	0.956	0.889	1.156	1.074	1.062	1.039	0.925	0.772	0.965	0.983		0.708	0.776	0.899	0.912	0.929	0.919	1.045	1.038	0.96	1.031	1.057	0.972	0.947	1.035
Capana02g002621	55	K	ALFC2_ARATH Probable fructose-bisphosphate aldolase 2, chloroplastic OS=Arabidopsis thaliana GN=FBA2 PE=1 SV=2	FBA2	1	3.33527e-06	119.94	ASSYADELVK(1)TAK	2	-6.6341	21	0.317	0.399	0.435	0.5	0.651	0.622		1.377	1.262	1.521		1.649	1.197	0.843	0.593	1.29	1.259	1.178	1.112	0.992	0.899	1.492	1.411		0.708	0.776	0.899	0.912	0.929	0.919	1.045	1.038	0.96	1.031	1.057	0.972	0.947	1.035
Capana02g002628	277	K	C3H44_ARATH Zinc finger CCCH domain-containing protein 44 OS=Arabidopsis thaliana GN=At3g51120 PE=2 SV=3	At3g51120	1	0.00903018	55.754	GISGK(1)SFDQSELK	2	-9.133	5								1.374						0.942	0.824							0.888		0.971
Capana02g002642	425	K	AL3F1_ARATH Aldehyde dehydrogenase family 3 member F1 OS=Arabidopsis thaliana GN=ALDH3F1 PE=2 SV=2	ALDH3F1	1	0.000394106	80.623	YHGK(1)YSFDTFSHEK	3	-6.75	3													0.938	1.085	0.977										0.769	0.804	0.663	0.702	0.667	0.693	0.68	0.694	0.762	0.719	0.51	0.434	2.041	1.751
Capana02g002668	224	K	PURA1_CAPFR Adenylosuccinate synthetase 1, chloroplastic OS=Capsicum frutescens GN=PURA1 PE=3 SV=1	PURA1	1	0.00486599	70.389	GIGPCYSSK(1)VIR	2	-6.3621	3				1.187	1.058					0.755															0.972	0.951	0.98	1.066	1.077	1.081	0.972	0.917	0.955	1.018	1.026	1.015	0.858	0.908
Capana02g002686	594	K	DHSA1_ARATH Succinate dehydrogenase [ubiquinone] flavoprotein subunit 1, mitochondrial OS=Arabidopsis thaliana GN=SDH1-1 PE=1 SV=1	SDH1-1	1	0.00138203	48.822	DDENWMK(1)HTLGYWENEK	3	-2.1408	3		0.47				1	1.53																		0.961	0.955	0.926	0.99	0.966	0.975	0.997	0.979	0.991	1.021	1.007	1.029	0.987	0.994
Capana02g002686	539	K	DHSA1_ARATH Succinate dehydrogenase [ubiquinone] flavoprotein subunit 1, mitochondrial OS=Arabidopsis thaliana GN=SDH1-1 PE=1 SV=1	SDH1-1	1	4.4528e-10	115.04	TWESFHDIQLK(1)DR	2	-4.548	11			1.068		0.566	1.267	0.938					0.57		1.06		0.85		1.035			1.302		0.939	1.405	0.961	0.955	0.926	0.99	0.966	0.975	0.997	0.979	0.991	1.021	1.007	1.029	0.987	0.994
Capana02g002686	167	K	DHSA1_ARATH Succinate dehydrogenase [ubiquinone] flavoprotein subunit 1, mitochondrial OS=Arabidopsis thaliana GN=SDH1-1 PE=1 SV=1	SDH1-1	1	9.0033e-11	130.71	AFGGQSLDFGK(1)GGQAYR	2	-5.4944	10						1.293		1.011	1.157	1.117		0.63	0.981			1.839		0.713		0.582	0.677				0.961	0.955	0.926	0.99	0.966	0.975	0.997	0.979	0.991	1.021	1.007	1.029	0.987	0.994
Capana02g002721	344	K	LAC11_ARATH Laccase-11 OS=Arabidopsis thaliana GN=LAC11 PE=2 SV=1	LAC11	1	0.00685926	65.12	SLNTPK(1)YPANVPLNVDR	2	4.4672	3				1.129	0.681								1.191
Capana02g002723	215	K	AAPC_CENCI Putative glucose-6-phosphate 1-epimerase OS=Cenchrus ciliaris PE=2 SV=1	---	1	4.95624e-41	156.73	VPDPTNPVEGK(1)EER	2	-7.2997	21	0.812	0.825	1.119	0.884	1.064	1.016	1.121	1.068	1.037	1.096	1.106		1.121	1.029	1.06	0.847	0.8	0.935	0.77		0.836		1.328	1.125	0.962	0.957	0.952	0.986	0.967	0.994	1.023	1.027	1.016	1.037	1	0.961	0.929	0.925
Capana02g002723	204	K	AAPC_CENCI Putative glucose-6-phosphate 1-epimerase OS=Cenchrus ciliaris PE=2 SV=1	---	1	0.00012869	123.92	TLNK(1)VPDPTNPVEGK	2	-5.3448	22	0.899		0.703	0.959	0.954	1.054	1.047	1.127	1.096	0.931	0.911		0.989	0.871	0.929	0.866	0.747	0.699	0.742	0.704	0.612	1.684	1.808	1.67	0.962	0.957	0.952	0.986	0.967	0.994	1.023	1.027	1.016	1.037	1	0.961	0.929	0.925
Capana02g002768	370	K	TCPZ_MOUSE T-complex protein 1 subunit zeta OS=Mus musculus GN=Cct6a PE=1 SV=3	Cct6a	1	0.00285667	47.27	YTFVENVK(1)NPHSCTILIK	3	-7.178	3								0.854						1.14					1.006						1.111	1.143	1.167	1.127	1.112	1.162	0.971	0.987	0.997	0.916	0.947	0.935	1.022	1.032
Capana02g002768	283	K	TCPZ_MOUSE T-complex protein 1 subunit zeta OS=Mus musculus GN=Cct6a PE=1 SV=3	Cct6a	1	0.00680944	72.038	NK(1)VCSGSDK	2	-4.5063	6		1.254	1.282											1.017	1.091			0.684			0.671				1.111	1.143	1.167	1.127	1.112	1.162	0.971	0.987	0.997	0.916	0.947	0.935	1.022	1.032
Capana02g002768	202	K	TCPZ_MOUSE T-complex protein 1 subunit zeta OS=Mus musculus GN=Cct6a PE=1 SV=3	Cct6a	1	0.000406081	142.04	HK(1)FDVDTR	2	-5.611	19	1.116	1.362	1.348	1.203	1.267	1.184	0.938			0.751			1.071	1.001	1.132	0.603	0.864	0.951	0.964	0.993	0.955		0.629	0.67	1.111	1.143	1.167	1.127	1.112	1.162	0.971	0.987	0.997	0.916	0.947	0.935	1.022	1.032
Capana02g002768	290	K	TCPZ_MOUSE T-complex protein 1 subunit zeta OS=Mus musculus GN=Cct6a PE=1 SV=3	Cct6a	1	3.81115e-06	121.69	VCSGSDK(1)NFVVINQK	2	-2.7308	10	1.157		1.154	1.197	1.195	0.983			1.004				0.822	1.087	0.692			0.71							1.111	1.143	1.167	1.127	1.112	1.162	0.971	0.987	0.997	0.916	0.947	0.935	1.022	1.032
Capana02g002775	97	K	KCS6_ARATH 3-ketoacyl-CoA synthase 6 OS=Arabidopsis thaliana GN=CUT1 PE=1 SV=1	CUT1	1	0.00440877	62.494	SIYLVDYSCYK(1)APVTCR	2	-1.521	1														1											0.916	0.828	0.843	0.78	0.861	0.845	0.906	1.002	1.03	0.524	0.495	0.544	1.373	1.32
Capana02g002775	13	K	KCS6_ARATH 3-ketoacyl-CoA synthase 6 OS=Arabidopsis thaliana GN=CUT1 PE=1 SV=1	CUT1	1	0.0131801	55.578	PEPLPNFSNSVK(1)FK	2	2.487	1																		1							0.916	0.828	0.843	0.78	0.861	0.845	0.906	1.002	1.03	0.524	0.495	0.544	1.373	1.32
Capana02g002790	71	K	AB hydrolase-1 domain-containing protein	---	1	0.00265733	58.916	GLQPDEEEK(1)R	2	-8.0661	1	1																								1.022	1.009	1.04	1.105	1.085	1.226	0.981	1.025	0.948	0.798	0.877	0.893	1.011	1.03
Capana02g002797	244	K	PLST4_ARATH Plastidic glucose transporter 4 OS=Arabidopsis thaliana GN=At5g16150 PE=1 SV=2	At5g16150	1	4.18067e-19	131.22	ISEAETSIK(1)R	2	-5.9991	23	0.803	0.886	0.799	1.082		0.977	1.144	1.132	0.957	0.934	0.831	0.903	0.939	1.057	1.067	0.787	0.807	0.767	0.41	0.442	0.577	1.769	1.965	1.966
Capana02g002800	62	K	GSO2_ARATH LRR receptor-like serine/threonine-protein kinase GSO2 OS=Arabidopsis thaliana GN=GSO2 PE=2 SV=2	GSO2	1	0.000343648	87.727	AGTDCCK(1)WSGVSCGDNNR	2	0.43549	4					1.018	1.015									1.142		0.825								0.971	0.891	0.868	1.001	0.974	0.952	0.692	0.694	0.714	0.787	0.798	0.759	1.062	1.066
Capana02g002837	349	K	HACL_ARATH 2-hydroxyacyl-CoA lyase OS=Arabidopsis thaliana GN=HACL PE=2 SV=1	HACL	0.975138	0.00843278	65.421	EIK(0.025)DDPFCLGK(0.975)SHPWAEALTK	3	-6.5284	2													1.058				0.942								0.931	0.927	0.841	0.9	0.883	0.861	0.705	0.763	0.723	0.732	0.726	0.782	1.093	1.181
Capana02g002845	57	K	IF5_PHAVU Eukaryotic translation initiation factor 5 OS=Phaseolus vulgaris GN=EIF5 PE=2 SV=1	EIF5	1	0.000740629	111.75	PASYTTK(1)HFGCELGAQSK	3	-8.688	12	1.367	1.282	1.442	1.468	1.166	1.246		0.725			0.489		0.934		0.603		0.637		0.642						1.199	1.196	1.224	1.144	1.079	1.059	1.052	0.994	1.051	0.976	0.935	0.99	1.065	0.971
Capana02g002877	311	K	SCRK2_ARATH Probable fructokinase-2 OS=Arabidopsis thaliana GN=At1g06030 PE=2 SV=1	At1g06030	1	0.010103	58.426	YYTK(1)DFSGR	2	-5.6656	2					1.116	0.884																			0.781	0.733	0.773	0.773	0.799	0.835	0.817	0.805	0.807	1.035	0.99	0.995	1.027	1.029
Capana02g002887	159	K	GLYM_SOLTU Serine hydroxymethyltransferase, mitochondrial OS=Solanum tuberosum PE=2 SV=1	---	1	1.26307e-168	242.86	IMALDLPHGGHLSHGYQTDTK(1)K	3	-6.472	71	0.89	0.935	0.945	0.887	0.929	0.901	0.929	0.924	0.936	0.748	0.824	0.84	1.078	1.114	1.045	0.928	0.906	0.91	1.023	1.126	1.115	1.34	1.353	1.375	0.871	0.856	0.873	0.821	0.866	0.874	1.062	1.029	1.021	0.925	0.902	0.901	0.951	0.967
Capana02g002887	458	K	GLYM_SOLTU Serine hydroxymethyltransferase, mitochondrial OS=Solanum tuberosum PE=2 SV=1	---	1	3.14517e-05	105.79	LKDFVATLESSAPIK(1)SEIAK	3	-9.0143	16				0.673		0.752	2.261	1.582	1.689		0.708	1.093		0.511	0.633	0.941	0.648			0.455	0.407	1.197	1.329	1.119	0.871	0.856	0.873	0.821	0.866	0.874	1.062	1.029	1.021	0.925	0.902	0.901	0.951	0.967
Capana02g002887	282	K	GLYM_SOLTU Serine hydroxymethyltransferase, mitochondrial OS=Solanum tuberosum PE=2 SV=1	---	1	0.000266303	62.705	QGK(1)EVLYDFEDK	2	-5.3266	4									0.926											1.117	0.682	1.275			0.871	0.856	0.873	0.821	0.866	0.874	1.062	1.029	1.021	0.925	0.902	0.901	0.951	0.967
Capana02g002887	111	K	GLYM_SOLTU Serine hydroxymethyltransferase, mitochondrial OS=Solanum tuberosum PE=2 SV=1	---	1	1.26765e-14	79.248	LDPAK(1)WGVNVQPLSGSPANFHVYTALLKPHER	4	-5.6757	6	0.6							1.556					0.812							1.032					0.871	0.856	0.873	0.821	0.866	0.874	1.062	1.029	1.021	0.925	0.902	0.901	0.951	0.967
Capana02g002887	12	K	GLYM_SOLTU Serine hydroxymethyltransferase, mitochondrial OS=Solanum tuberosum PE=2 SV=1	---	1	0.00555886	57.003	SSLPNEAVYDK(1)EK	2	-6.7093	3						0.715													0.952			1.333			0.871	0.856	0.873	0.821	0.866	0.874	1.062	1.029	1.021	0.925	0.902	0.901	0.951	0.967
Capana02g002887	99	K	GLYM_SOLTU Serine hydroxymethyltransferase, mitochondrial OS=Solanum tuberosum PE=2 SV=1	---	1	0	368.67	YYGGNEYIDMAETLCQK(1)R	2	5.4184	89	0.997	0.962	0.969	1.004	1.281	0.984	0.62	0.622	0.634	0.817	0.89	1.063	1.297	1.824	1.542	0.811	0.805	0.794	0.872	0.813	0.751	1.169	1.247	1.234	0.871	0.856	0.873	0.821	0.866	0.874	1.062	1.029	1.021	0.925	0.902	0.901	0.951	0.967
Capana02g002887	482	K	GLYM_SOLTU Serine hydroxymethyltransferase, mitochondrial OS=Solanum tuberosum PE=2 SV=1	---	1	0.00678485	50.116	QFPTIGFEK(1)ETMK	2	-11.674	2								1.143					0.857												0.871	0.856	0.873	0.821	0.866	0.874	1.062	1.029	1.021	0.925	0.902	0.901	0.951	0.967
Capana02g002887	375	K	GLYM_SOLTU Serine hydroxymethyltransferase, mitochondrial OS=Solanum tuberosum PE=2 SV=1	---	1	7.57715e-25	130.71	VEK(1)VLEAVHIAANK	2	-5.1245	24	0.571	0.578	0.709	0.603	0.775	0.643	1.064	0.941	0.963	0.829	0.852	0.923	0.874	1.059	1.064	0.989	0.904	1.078	1.133	1.329	1.202	1.613	1.748	1.554	0.871	0.856	0.873	0.821	0.866	0.874	1.062	1.029	1.021	0.925	0.902	0.901	0.951	0.967
Capana02g002887	337	K	GLYM_SOLTU Serine hydroxymethyltransferase, mitochondrial OS=Solanum tuberosum PE=2 SV=1	---	1	0	267.63	AYQEQVLSNSSK(1)FAQALGEK	2	4.5046	25				0.551				0.848	0.184	1.21	0.736	0.628	1.088	0.709		1.713	1.55	1.548	0.839	0.682	0.886	1.4		1.428	0.871	0.856	0.873	0.821	0.866	0.874	1.062	1.029	1.021	0.925	0.902	0.901	0.951	0.967
Capana02g002887	364	K	GLYM_SOLTU Serine hydroxymethyltransferase, mitochondrial OS=Solanum tuberosum PE=2 SV=1	---	1	3.93242e-28	128.28	GYDLVSGGTDNHLVLVNLK(1)NK	2	14.092	25			0.444			0.661	0.648	1.353		0.935			1.653			1.868	1.4	1.34	0.383	0.314					0.871	0.856	0.873	0.821	0.866	0.874	1.062	1.029	1.021	0.925	0.902	0.901	0.951	0.967
Capana02g002890	169	K	OPDA_HAEIN Oligopeptidase A OS=Haemophilus influenzae (strain ATCC 51907 / DSM 11121 / KW20 / Rd) GN=prlC PE=3 SV=1	prlC	1	8.32514e-05	80.623	LSQK(1)FEENVLDSTK	2	-2.4418	15		1.245	1.111		1.11	0.994			0.87	1.08		1.005	1.121	1.141	1.239		0.938	0.936		0.778	0.822			0.609	1.069	1.052	1.05	0.984	0.951	0.987	1.083	1.077	1.08	1.209	1.178	1.191	0.956	0.966
Capana02g002890	322	K	OPDA_HAEIN Oligopeptidase A OS=Haemophilus influenzae (strain ATCC 51907 / DSM 11121 / KW20 / Rd) GN=prlC PE=3 SV=1	prlC	1	0.0002529	93.467	DLEDLK(1)DFCK	2	-5.3365	11					0.397		0.577	1.055	1.352	1.243			1.181			1.123	1	1.034	1.391			0.646			1.069	1.052	1.05	0.984	0.951	0.987	1.083	1.077	1.08	1.209	1.178	1.191	0.956	0.966
Capana02g002890	78	K	OPDA_HAEIN Oligopeptidase A OS=Haemophilus influenzae (strain ATCC 51907 / DSM 11121 / KW20 / Rd) GN=prlC PE=3 SV=1	prlC	1	9.87606e-05	108.5	LTVVWGAVNHLK(1)SVK	2	-1.506	21	1.122	1.016	1.083	1.015	1.067	0.969	1.183	0.737	1.154	0.969	1.052	1.058	0.802		0.936	0.856		0.75	1.032	0.976	1.13		1.049	1.044	1.069	1.052	1.05	0.984	0.951	0.987	1.083	1.077	1.08	1.209	1.178	1.191	0.956	0.966
Capana02g002896	327	K	GTE7_ARATH Transcription factor GTE7 OS=Arabidopsis thaliana GN=GTE7 PE=2 SV=1	GTE7	1	0.0169366	47.561	K(1)VAAIMQVK(1)PQK	2	6.1192	1						1
Capana02g002896	319	K	GTE7_ARATH Transcription factor GTE7 OS=Arabidopsis thaliana GN=GTE7 PE=2 SV=1	GTE7	1	0.0169366	47.561	K(1)VAAIMQVK(1)PQK	2	6.1192	1						1
Capana02g002898	42	K	BXL6_ARATH Probable beta-D-xylosidase 6 OS=Arabidopsis thaliana GN=BXL6 PE=2 SV=1	BXL6	1	0.00398983	55.578	FPCHPPHHK(1)YDFCNK	3	-1.6243	6	1.277		1.217			1.268							0.754	0.756			0.728								1.097	1.164	0.963	1.116	1.205	1.157	1.107	1.011	1.021	1.035	1.099	1.094	0.882	0.942
Capana02g002908	229	K	WDR5_RAT WD repeat-containing protein 5 OS=Rattus norvegicus GN=Wdr5 PE=2 SV=1	Wdr5	1	0.00521041	77.358	VLK(1)TYTGHANSK	2	-7.0664	9		1.2	0.892	0.992	1.028	1.099				0.629			0.98	0.851								1.33			1.521	0.973	0.918	1.171	1.305	1.102		0.507	0.626	0.822	1.325	0.769	0.742	0.796
Capana02g002921	118	K	XTH7_ARATH Probable xyloglucan endotransglucosylase/hydrolase protein 7 OS=Arabidopsis thaliana GN=XTH7 PE=2 SV=2	XTH7	1	1.65429e-08	85.813	MNHMIYDYCTDK(1)SR	2	-2.2763	11				1.355	1.562					0.629			1.048	1.26		0.511	0.635								0.595	0.628	1	0.797	1.117	0.953	1.132	1.16	1.19	1.471	1.131	1.083	0.994	0.909
Capana02g002921	15	K	XTH7_ARATH Probable xyloglucan endotransglucosylase/hydrolase protein 7 OS=Arabidopsis thaliana GN=XTH7 PE=2 SV=2	XTH7	1	0.00285783	91.783	AYK(1)NNEAK	2	-3.5345	17	0.996		1.059	1.274	1.136	1.209		0.721	0.659	1.041		1.208	1.036	1.045	1.03	0.591			0.523	0.509			1.545	1.416	0.595	0.628	1	0.797	1.117	0.953	1.132	1.16	1.19	1.471	1.131	1.083	0.994	0.909
Capana02g002926	57	K	PCP_PONAB Lysosomal Pro-X carboxypeptidase OS=Pongo abelii GN=PRCP PE=2 SV=1	PRCP	1	6.27927e-06	92.732	YNYETK(1)YFQQK	2	0.0065777	27	0.892		1.005	0.934		1.17	1.136	1.09		1.059	1.181		0.905			1.034	1.009			0.883	0.814	1.006		0.884	0.988	0.946	0.936	1.026	0.983	1.026	1.022	1.019	1.028	1.15	1.107	1.108	0.892	0.9
Capana02g002926	142	K	PCP_PONAB Lysosomal Pro-X carboxypeptidase OS=Pongo abelii GN=PRCP PE=2 SV=1	PRCP	1	0.000152992	139.7	YYGESMPYGSK(1)EEAYK	2	-0.97261	20			0.656			0.262	1.759	1.384	1.898	1.105	1.084	1.017		0.558		1.042			0.393	0.842					0.988	0.946	0.936	1.026	0.983	1.026	1.022	1.019	1.028	1.15	1.107	1.108	0.892	0.9
Capana02g002926	399	K	PCP_PONAB Lysosomal Pro-X carboxypeptidase OS=Pongo abelii GN=PRCP PE=2 SV=1	PRCP	1	4.86502e-06	80.623	SNEEQCLK(1)DYHVK	2	-6.6583	12	1.156	1.587		1.278							0.627			0.96	0.812									0.581	0.988	0.946	0.936	1.026	0.983	1.026	1.022	1.019	1.028	1.15	1.107	1.108	0.892	0.9
Capana02g002926	404	K	PCP_PONAB Lysosomal Pro-X carboxypeptidase OS=Pongo abelii GN=PRCP PE=2 SV=1	PRCP	1	0.0103872	54.056	DYHVK(1)PR	2	-2.8743	4										1.111							0.628						0.974	1.287	0.988	0.946	0.936	1.026	0.983	1.026	1.022	1.019	1.028	1.15	1.107	1.108	0.892	0.9
Capana02g002928	294	K	BCAT5_ARATH Branched-chain-amino-acid aminotransferase 5, chloroplastic OS=Arabidopsis thaliana GN=BCAT5 PE=1 SV=1	BCAT5	1	4.43739e-05	124.46	GYSDVLYLDSFQK(1)R	2	5.2897	9																1.503	1.314	0.804	0.821	0.515		0.936	1.108		0.999	0.926	0.933	1.03	1.025	1.018	0.835	0.852	0.813	1.033	1.033	1.11	0.977	0.974
Capana02g002928	145	K	BCAT5_ARATH Branched-chain-amino-acid aminotransferase 5, chloroplastic OS=Arabidopsis thaliana GN=BCAT5 PE=1 SV=1	BCAT5	1	3.9667e-41	181.9	K(1)HDGNILLFRPEENATR	3	-6.6726	23	1.371	1.357	1.37	1.459	1.394	1.481	0.779	0.765	0.755	0.883	0.833	0.79	1.235	1.185	1.195	0.771	0.672		0.667	0.7	0.676	0.873	0.882	0.906	0.999	0.926	0.933	1.03	1.025	1.018	0.835	0.852	0.813	1.033	1.033	1.11	0.977	0.974
Capana02g002959	123	K	NDUS4_ARATH NADH dehydrogenase [ubiquinone] iron-sulfur protein 4, mitochondrial OS=Arabidopsis thaliana GN=FRO1 PE=2 SV=1	FRO1	1	8.04432e-16	126.17	AFAEK(1)HGWEYTVK	2	-3.0677	22	0.946	0.978	1.09	0.995	1.021	1.07	0.885	0.797	0.862	1.136	1.186	1.177	0.822	0.875	0.88	0.758	0.747	0.742	0.838			1.394	1.427	1.373
Capana02g002959	131	K	NDUS4_ARATH NADH dehydrogenase [ubiquinone] iron-sulfur protein 4, mitochondrial OS=Arabidopsis thaliana GN=FRO1 PE=2 SV=1	FRO1	1	0.00258776	108.3	HGWEYTVK(1)K	2	-7.9445	12		0.876		0.707	0.83	0.819		0.973				1.232		0.938	0.94					0.759		1.323	1.284	1.319
Capana02g002977	45	K	VDAC2_ARATH Mitochondrial outer membrane protein porin 2 OS=Arabidopsis thaliana GN=VDAC2 PE=1 SV=1	VDAC2	1	0.00932436	74.269	YK(1)NTLIDVK	2	-7.667	10				0.934					0.808		0.686		1.211		1.147			0.702	0.702			1.096	1.283	1.431	0.95	0.795	0.791	0.987	0.946	0.895	0.9	0.928	0.987	1.103	1.045	1.076	0.798	0.919
Capana02g002977	43	K	VDAC2_ARATH Mitochondrial outer membrane protein porin 2 OS=Arabidopsis thaliana GN=VDAC2 PE=1 SV=1	VDAC2	1	3.68709e-22	169.52	GGLSTGDVGAQYK(1)YK	2	-6.1179	58		0.685	0.784	0.732	0.767	0.661	0.782	0.701	0.743	1.154	1.286	1.374	0.818	0.687	1.012	0.888	0.837	1.005	1.353	1.623	1.469	1.008	1.337	1.294	0.95	0.795	0.791	0.987	0.946	0.895	0.9	0.928	0.987	1.103	1.045	1.076	0.798	0.919
Capana02g002977	176	K	VDAC2_ARATH Mitochondrial outer membrane protein porin 2 OS=Arabidopsis thaliana GN=VDAC2 PE=1 SV=1	VDAC2	1	0.000729706	81.335	ASYIHHLDELK(1)K	2	-9.0127	10					0.867		0.586			0.744					0.859	0.874				1.144		1.55		1.377	0.95	0.795	0.791	0.987	0.946	0.895	0.9	0.928	0.987	1.103	1.045	1.076	0.798	0.919
Capana02g002990	104	K	PER51_ARATH Peroxidase 51 OS=Arabidopsis thaliana GN=PER51 PE=2 SV=1	PER51	1	0.00348841	61.067	NK(1)VSCADILALATR	2	-6.4253	2																	1.126					0.874			0.983	0.895	0.874	0.846	0.815	0.836	1.051	1.103	0.987	1.167	1	1.138	1.161	1.124
Capana02g002990	208	K	PER51_ARATH Peroxidase 51 OS=Arabidopsis thaliana GN=PER51 PE=2 SV=1	PER51	1	1.26237e-13	143.25	IYNFSPQSPIDPTLNK(1)QYAAQLR	3	-2.0046	8							1.274	1.358	1.298	0.809			1.224			0.324	0.713								0.983	0.895	0.874	0.846	0.815	0.836	1.051	1.103	0.987	1.167	1	1.138	1.161	1.124
Capana02g002993	44	K	CSK22_ARATH Casein kinase II subunit alpha-2 OS=Arabidopsis thaliana GN=CKA2 PE=2 SV=2	CKA2	1	0.00919086	69.224	GK(1)YSEVFEGINVNSNEK	2	-1.1821	3													1.422						0.694					0.884	1.129	1.099	1.058	1.109	1.138	1.162	0.803	0.838	0.838	0.877	0.841	0.86	1.02	0.956
Capana02g002996	743	K	SUBL_ARATH Subtilisin-like protease OS=Arabidopsis thaliana GN=ARA12 PE=1 SV=1	ARA12	1	3.55013e-24	146.48	IEWSDGK(1)HVVSSPVAISQT	2	0.17966	12								0.746	0.602	0.95	0.848	0.621	1.013						0.741	0.637	0.688	2.108	1.689	1.357	0.904	0.891	0.875	0.954	0.936	0.896	0.762	0.784	0.774	0.881	0.858	0.857	1.089	1.082
Capana02g003039	147	K	Putative ovule protein (Fragment)	---	1	0.00730214	66.664	TVAEVLGQYK(1)SK	2	-9.5271	2																							0.954	1.046
Capana02g003061	204	K	CBSX1_ARATH CBS domain-containing protein CBSX1, chloroplastic OS=Arabidopsis thaliana GN=CBSX1 PE=1 SV=2	CBSX1	1	0.00339638	151.22	RLPVVDGK(1)GR	2	-6.9268	19	1.03	0.997	0.966	0.959	0.895		1.018	0.99	0.988	1.039	1.12	1.095			0.875	0.886	0.828			1.071	1.092	0.994	1.066	1.09	0.859	0.731	0.815	0.808	0.79	0.805	1.107	1.056	1.064	1.033	1.091	1.087	0.846	0.809
Capana02g003080	475	K	PNCB_DROME Nicotinate phosphoribosyltransferase OS=Drosophila melanogaster GN=CG3714 PE=2 SV=2	CG3714	1	0.00187046	90.308	HPFSESK(1)R	2	-3.5078	9					0.393	0.815		0.708				0.244		1.261		1.49			1.637	0.934	1.519				1.217	1.188	1.119	1.074	1.075	1.012	1.001	1.074	1.077	0.786	0.773	0.812	1.326	1.285
Capana02g003100	54	K	HSF24_SOLPE Heat shock factor protein HSF24 OS=Solanum peruvianum GN=HSF24 PE=2 SV=1	HSF24	1	0.00297461	85.622	YFK(1)HNNFSSFVR	3	0.032813	8			0.864		1.12		0.909		1.187		0.772			0.899		1.087			1.162
Capana02g003115	231	K	AMP1D_ARATH Methionine aminopeptidase 1D, chloroplastic/mitochondrial OS=Arabidopsis thaliana GN=MAP1D PE=2 SV=1	MAP1D	1	0.000855094	103.8	TIHDLADK(1)HR	2	-5.438	8					1.013					0.933	1.251	1.196		0.918	1.03						1.125		0.534		1.154	1.129	1.026	0.945	1.034	1.019	1.038	1.082	1.045	1.051	1.169	1.142	0.931	0.889
Capana02g003115	90	K	AMP1D_ARATH Methionine aminopeptidase 1D, chloroplastic/mitochondrial OS=Arabidopsis thaliana GN=MAP1D PE=2 SV=1	MAP1D	1	1.7234e-05	57.476	LRPGQISPPRPVPEQIQRPPYVK(1)SR	4	-4.8079	4		1.285		1.032							0.927					0.756									1.154	1.129	1.026	0.945	1.034	1.019	1.038	1.082	1.045	1.051	1.169	1.142	0.931	0.889
Capana02g003124	1479	K	WD_REPEATS_REGION domain-containing protein	---	1	8.61944e-05	133.98	HLGSLPLLAK(1)HR	3	-4.9012	15	1.211	1.167	1.202	1.54	1.46	1.382	0.539	0.8	0.776		0.491		1.337	1.218			0.693	0.572			0.611				1.155	1.188	1.179	1.123	1.065	1.068	1.013	1.081	0.975	0.851	0.925	0.958	1.135	1.129
Capana02g003124	911	K	WD_REPEATS_REGION domain-containing protein	---	1	0.00868246	74.524	QLGYACIK(1)YAQFDSAK	2	5.6357	2	1.029					0.971																			1.155	1.188	1.179	1.123	1.065	1.068	1.013	1.081	0.975	0.851	0.925	0.958	1.135	1.129
Capana02g003132	180	K	RL25_EHRCJ 50S ribosomal protein L25 OS=Ehrlichia canis (strain Jake) GN=rplY PE=3 SV=1	rplY	1	0.0112175	54.309	IRPTLK(1)FLCPAEHIR	3	-9.9108	4		0.979		1.173		1.146									0.702
Capana02g003159	206	K	MOCOS_SOLLC Molybdenum cofactor sulfurase OS=Solanum lycopersicum GN=FLACCA PE=2 SV=1	FLACCA	1	0.00183687	76.572	GTVEHDIK(1)AR	2	-5.9078	2																			1.059		0.941				1.202	0.829	0.809				0.89			0.803				0.787
Capana02g003173	159	K	PSBO_SOLTU Oxygen-evolving enhancer protein 1, chloroplastic OS=Solanum tuberosum GN=PSBO PE=2 SV=1	PSBO	1	1.23586e-53	172.92	NSAPEFQK(1)TK(1)LMTR	2	3.1562	69	0.886	0.873	0.831	0.801	0.493	0.881	1.08	1.048	1.07	1.367	1.174	1.249	0.986	0.388	0.711	0.862	0.754	0.829	0.977	0.994	1.013	1.55	1.71	1.475	0.698	0.751	0.806	0.809	0.773	0.789	1.028	1.009	1.039	1.204	1.173	1.161	0.912	0.919
Capana02g003173	271	K	PSBO_SOLTU Oxygen-evolving enhancer protein 1, chloroplastic OS=Solanum tuberosum GN=PSBO PE=2 SV=1	PSBO	1	1.19396e-12	138.23	GDEEELEK(1)ENLK(1)NTASSR	2	10.22	6					1.099				0.802	0.385		1.671						1.024	1.019						0.698	0.751	0.806	0.809	0.773	0.789	1.028	1.009	1.039	1.204	1.173	1.161	0.912	0.919
Capana02g003173	161	K	PSBO_SOLTU Oxygen-evolving enhancer protein 1, chloroplastic OS=Solanum tuberosum GN=PSBO PE=2 SV=1	PSBO	1	0.00900614	66.619	NSAPEFQK(1)TK(1)LMTR	2	3.1562	3	1.197				0.984									0.819											0.698	0.751	0.806	0.809	0.773	0.789	1.028	1.009	1.039	1.204	1.173	1.161	0.912	0.919
Capana02g003173	129	K	PSBO_SOLTU Oxygen-evolving enhancer protein 1, chloroplastic OS=Solanum tuberosum GN=PSBO PE=2 SV=1	PSBO	1	0	396.26	PGK(1)YNAK	2	2.8985	163	0.913	0.866	0.88	0.807	0.836	0.823	1.089	1.16	1.139	1.132	1.071	1.097	0.88	0.775	0.873	0.919	0.903	0.858	1.134	1.108	1.068	1.233	1.223	1.213	0.698	0.751	0.806	0.809	0.773	0.789	1.028	1.009	1.039	1.204	1.173	1.161	0.912	0.919
Capana02g003173	99	K	PSBO_SOLTU Oxygen-evolving enhancer protein 1, chloroplastic OS=Solanum tuberosum GN=PSBO PE=2 SV=1	PSBO	1	2.84515e-125	240.94	RLTYDEIQSK(1)TYMEVK	2	0.66826	83		0.991	1.11	0.896	0.93	1.376	0.948	0.844	0.873	1.235	1.031	1.145	1.213	1.244	1.328	0.887	0.584	0.444	0.665	0.719	0.535	1.462	1.38	1.158	0.698	0.751	0.806	0.809	0.773	0.789	1.028	1.009	1.039	1.204	1.173	1.161	0.912	0.919
Capana02g003173	145	K	PSBO_SOLTU Oxygen-evolving enhancer protein 1, chloroplastic OS=Solanum tuberosum GN=PSBO PE=2 SV=1	PSBO	1	8.94239e-05	114.5	LCLEPTSFTVK(1)AEGVNK(1)NSAPEFQK	3	8.8453	24						0.599	2.998		0.533					0.717	0.583	1.397					0.471	0.702			0.698	0.751	0.806	0.809	0.773	0.789	1.028	1.009	1.039	1.204	1.173	1.161	0.912	0.919
Capana02g003173	151	K	PSBO_SOLTU Oxygen-evolving enhancer protein 1, chloroplastic OS=Solanum tuberosum GN=PSBO PE=2 SV=1	PSBO	1	2.78372e-74	221.56	LCLEPTSFTVK(1)AEGVNK(1)NSAPEFQK	3	8.8453	85	0.972	1.06	0.998	0.927	1.061	1.051	0.934	0.951	0.902	1.148	1.161	1.201	0.989	0.97	0.939	0.793	0.72	0.698	0.819	0.894	0.943	1.267	1.301	1.299	0.698	0.751	0.806	0.809	0.773	0.789	1.028	1.009	1.039	1.204	1.173	1.161	0.912	0.919
Capana02g003173	275	K	PSBO_SOLTU Oxygen-evolving enhancer protein 1, chloroplastic OS=Solanum tuberosum GN=PSBO PE=2 SV=1	PSBO	1	0	293.6	GDEEELEK(1)ENLK(1)NTASSR	2	10.22	132	0.951	0.776	0.814	0.945	0.975	1.204	1.11	1.046	0.864	1.105	0.737	1.017	0.969	0.942	0.85	0.789	0.54	0.553	0.721	0.689	1.067	1.726	1.752	1.858	0.698	0.751	0.806	0.809	0.773	0.789	1.028	1.009	1.039	1.204	1.173	1.161	0.912	0.919
Capana02g003173	133	K	PSBO_SOLTU Oxygen-evolving enhancer protein 1, chloroplastic OS=Solanum tuberosum GN=PSBO PE=2 SV=1	PSBO	0.999037	7.87876e-141	207.23	GTGTANQCPTVDGGVDSFAFK(0.006)PGK(0.995)YNAK(0.999)K	3	-0.39879	29	1.364		1.442	1.536	1.577	1.501	1.033	1.083	1.156	1.21	0.818		1.095	1.04	1.109	0.635	0.68		0.544	0.689	0.629		0.438	0.421	0.698	0.751	0.806	0.809	0.773	0.789	1.028	1.009	1.039	1.204	1.173	1.161	0.912	0.919
Capana02g003173	105	K	PSBO_SOLTU Oxygen-evolving enhancer protein 1, chloroplastic OS=Solanum tuberosum GN=PSBO PE=2 SV=1	PSBO	1	2.53372e-88	158.35	TYMEVK(1)GTGTANQCPTVDGGVDSFAFKPGK	3	0.95178	25	2.086	0.668	1.856	0.453	0.574	1.66	0.788	0.877	2.785	0.384	0.413	1.808	0.561	1.435	0.481				0.372	0.374		0.423			0.698	0.751	0.806	0.809	0.773	0.789	1.028	1.009	1.039	1.204	1.173	1.161	0.912	0.919
Capana02g003173	126	K	PSBO_SOLTU Oxygen-evolving enhancer protein 1, chloroplastic OS=Solanum tuberosum GN=PSBO PE=2 SV=1	PSBO	1	3.19624e-87	209.03	GTGTANQCPTVDGGVDSFAFK(1)PGK(1)YNAK	3	-2.4534	65	1.018	0.144	0.139	0.117	0.694	0.124	2.159	2.088	0.17	0.203	1.593	1.583	1.234	0.169	0.196	0.155	1.259	1.191	2.176	2.021	1.995	0.361	1.616	1.596	0.698	0.751	0.806	0.809	0.773	0.789	1.028	1.009	1.039	1.204	1.173	1.161	0.912	0.919
Capana02g003203	103	K	GAST1_SOLLC Protein GAST1 OS=Solanum lycopersicum GN=GAST1 PE=2 SV=1	GAST1	1	0.00142234	63.212	QTCPCYNNWK(1)TK	2	-1.4717	3				0.905		1.516			0.579
Capana02g003203	68	K	GAST1_SOLLC Protein GAST1 OS=Solanum lycopersicum GN=GAST1 PE=2 SV=1	GAST1	0.999623	4.26001e-10	110.44	TSYK(1)KPCMFFCQK	2	-0.59903	14	1.419			1.515	1.378	1.529		0.806	0.888	0.872				0.684	0.565	0.703			0.878		0.779	0.983
Capana02g003268	79	K	rapid alkalinization factor-like	---	1	0.00379033	67.903	ALQK(1)PQLCR	2	-9.0429	7					1.156		0.737								0.821			0.694	0.776			1.306		1.51
Capana02g003269	298	K	EIF3M_DICDI Eukaryotic translation initiation factor 3 subunit M OS=Dictyostelium discoideum GN=eif3m PE=1 SV=1	eif3m	1	0.00162307	68.108	SYGLVHDDCISK(1)MR	2	-2.2352	3			0.947		1.148	0.905																			1.183	1.225	1.18	1.21	1.186	1.161	1.045	1.046	1.041	0.933	0.922	0.938	0.994	0.991
Capana02g003284	118	K	SCP25_ARATH Serine carboxypeptidase-like 25 OS=Arabidopsis thaliana GN=SCPL25 PE=2 SV=2	SCPL25	1	3.66616e-33	150.44	TASGLYVNK(1)FSWNK	2	2.2066	22	0.85	0.892	0.763	1.198	1.138	1.127	0.461	0.92	1.06	1.089	0.792	0.88	1.596	0.957	1.054	1.325		1.335	0.846	0.812	0.776		1.098	1.033	0.965	1.014	1.027	1.057	1.043	1.049	0.792	0.809	0.769	0.893	0.901	0.901	1.135	1.15
Capana02g003284	30	K	SCP25_ARATH Serine carboxypeptidase-like 25 OS=Arabidopsis thaliana GN=SCPL25 PE=2 SV=2	SCPL25	1	0.00528321	83.438	HQK(1)EEEADR	2	-6.0724	1														1											0.965	1.014	1.027	1.057	1.043	1.049	0.792	0.809	0.769	0.893	0.901	0.901	1.135	1.15
Capana02g003303	296	K	MPPB_ARATH Probable mitochondrial-processing peptidase subunit beta OS=Arabidopsis thaliana GN=At3g02090 PE=1 SV=2	At3g02090	1	0.00167478	74.424	HEEFVEQVK(1)K	2	-7.7992	3		0.886																					1.248	0.865	1.153	1.018	0.866	1.042	0.962	1.003	0.709	0.68	0.78	1.152	1.152	1.147	0.897	0.864
Capana02g003303	266	K	MPPB_ARATH Probable mitochondrial-processing peptidase subunit beta OS=Arabidopsis thaliana GN=At3g02090 PE=1 SV=2	At3g02090	1	0.000318785	45.17	SHLK(1)DYISTHYTAPR	2	-2.601	1																						1			1.153	1.018	0.866	1.042	0.962	1.003	0.709	0.68	0.78	1.152	1.152	1.147	0.897	0.864
Capana02g003310	64	K	UGDH_SOYBN UDP-glucose 6-dehydrogenase OS=Glycine max PE=2 SV=1	---	1	2.3337e-08	124.06	GK(1)NLFFSTDVETHVR	2	-1.554	10	0.749		0.74	0.673		1.258	1.545	1.135	1.168						0.731
Capana02g003310	307	K	UGDH_SOYBN UDP-glucose 6-dehydrogenase OS=Glycine max PE=2 SV=1	---	1	0.00349176	90.308	INDYQK(1)SR	2	-13.988	7		1.339			1.26	1.904			0.592			1.144									0.471	0.292
Capana02g003315	727	K	CLPB3_ARATH Chaperone protein ClpB3, chloroplastic OS=Arabidopsis thaliana GN=CLPB3 PE=1 SV=1	CLPB3	1	2.691e-133	225.1	IDMSEYMEK(1)HAVSR	2	-3.8478	27	1.129	1.105	1.2	1.009	0.966	1.034	1.16	1.103	1.143	1.03		1.082	1.033	1.015	0.995	0.87	0.845	0.855	1.164	1.229	1.095	0.63	0.649	0.658	0.964	0.928	0.993	0.816	0.836	0.83	1.189	1.206	1.199	1.194	1.179	1.194	0.941	0.958
Capana02g003315	240	K	CLPB3_ARATH Chaperone protein ClpB3, chloroplastic OS=Arabidopsis thaliana GN=CLPB3 PE=1 SV=1	CLPB3	1	0.00125805	82.437	QNVIDQDPEGK(1)YESLEK	2	3.9494	11		1.014	0.657			1.113	1.071							1.188	0.957										0.964	0.928	0.993	0.816	0.836	0.83	1.189	1.206	1.199	1.194	1.179	1.194	0.941	0.958
Capana02g003315	246	K	CLPB3_ARATH Chaperone protein ClpB3, chloroplastic OS=Arabidopsis thaliana GN=CLPB3 PE=1 SV=1	CLPB3	1	0.0191487	48.157	YESLEK(1)YGK	2	-4.2967	5	0.992					1.239				0.963					1.082				0.725						0.964	0.928	0.993	0.816	0.836	0.83	1.189	1.206	1.199	1.194	1.179	1.194	0.941	0.958
Capana02g003315	831	K	CLPB3_ARATH Chaperone protein ClpB3, chloroplastic OS=Arabidopsis thaliana GN=CLPB3 PE=1 SV=1	CLPB3	1	0.00247426	63.397	EATYQTIK(1)QR	2	-6.6795	5								0.975															0.927	1.097	0.964	0.928	0.993	0.816	0.836	0.83	1.189	1.206	1.199	1.194	1.179	1.194	0.941	0.958
Capana02g003315	108	K	CLPB3_ARATH Chaperone protein ClpB3, chloroplastic OS=Arabidopsis thaliana GN=CLPB3 PE=1 SV=1	CLPB3	1	2.78453e-07	137.58	ENK(1)HQIVETEHLMK	3	0.39889	48	0.995	1.001	0.961	0.727	1.065	0.984	1.406	1.378	1.287	1.107	0.972	1.14	1.049	1.083	0.978			0.718	0.997	0.871	0.99	0.756	0.816	0.719	0.964	0.928	0.993	0.816	0.836	0.83	1.189	1.206	1.199	1.194	1.179	1.194	0.941	0.958
Capana02g003315	655	K	CLPB3_ARATH Chaperone protein ClpB3, chloroplastic OS=Arabidopsis thaliana GN=CLPB3 PE=1 SV=1	CLPB3	1	4.83208e-08	117.3	LLHLEEELHK(1)R	3	-4.3077	24	1.126		0.926	0.995			1.134	1.059	1.514	1.007		1.161			1.125		0.959	0.741				0.755	0.82	0.678	0.964	0.928	0.993	0.816	0.836	0.83	1.189	1.206	1.199	1.194	1.179	1.194	0.941	0.958
Capana02g003315	585	K	CLPB3_ARATH Chaperone protein ClpB3, chloroplastic OS=Arabidopsis thaliana GN=CLPB3 PE=1 SV=1	CLPB3	1	0.000232655	91.245	AAELK(1)YGSLNTLQR	2	-7.2359	14	0.815		0.817	0.72			0.795	1.138	0.896			1.074	1.323	0.981		0.84	0.942		1.317	1.141	1.201				0.964	0.928	0.993	0.816	0.836	0.83	1.189	1.206	1.199	1.194	1.179	1.194	0.941	0.958
Capana02g003315	404	K	CLPB3_ARATH Chaperone protein ClpB3, chloroplastic OS=Arabidopsis thaliana GN=CLPB3 PE=1 SV=1	CLPB3	1	0.0133837	92.428	K(1)YIEKDPALER	2	-7.1782	3						0.81						1.022		1.168											0.964	0.928	0.993	0.816	0.836	0.83	1.189	1.206	1.199	1.194	1.179	1.194	0.941	0.958
Capana02g003324	401	K	ANGLT_ROSHC Anthocyanidin 5,3-O-glucosyltransferase OS=Rosa hybrid cultivar GN=RhGT1 PE=2 SV=1	RhGT1	1	0.000272407	85.716	LVK(1)SEEIEEK	2	-7.4421	19	0.459				0.816	1.262	1	0.853	1.019	0.859	0.67	0.875		0.912	0.779	1.07	1.257			0.836	0.864	1.402	1.623	1.444	0.997	0.978	0.942	1.039	0.996	1.026	0.747	0.788	0.789	0.707	0.787	0.711	1.019	1.065
Capana02g003324	239	K	ANGLT_ROSHC Anthocyanidin 5,3-O-glucosyltransferase OS=Rosa hybrid cultivar GN=RhGT1 PE=2 SV=1	RhGT1	1	4.04592e-28	162.23	YHK(1)SVCENTSLPK	2	-6.6728	20	1.011	1.139	1.077	1.115	1.313		0.402	0.706	0.818		0.749	0.645	1.123	1.228	1.338		1.056	1.033	0.597		0.757	1.28	1.301	1.31	0.997	0.978	0.942	1.039	0.996	1.026	0.747	0.788	0.789	0.707	0.787	0.711	1.019	1.065
Capana02g003324	417	K	ANGLT_ROSHC Anthocyanidin 5,3-O-glucosyltransferase OS=Rosa hybrid cultivar GN=RhGT1 PE=2 SV=1	RhGT1	1	1.78191e-07	118.91	ITQLMEDHK(1)LR	2	-6.3933	8													0.767	0.868				0.707	0.949		0.887	1.169	1.208	1.446	0.997	0.978	0.942	1.039	0.996	1.026	0.747	0.788	0.789	0.707	0.787	0.711	1.019	1.065
Capana02g003365	367	K	SSY2_SOLTU Granule-bound starch synthase 2, chloroplastic/amyloplastic OS=Solanum tuberosum GN=SS2 PE=1 SV=3	SS2	1	0.000232539	120.33	HMEK(1)NIYGGNR	2	-6.6846	3	1.23														0.873	0.897									1.06	1.043	1.013	0.772	0.762	0.76	1.041	1.041	1.044	0.951	0.941	0.903	1.045	1.015
Capana02g003365	646	K	SSY2_SOLTU Granule-bound starch synthase 2, chloroplastic/amyloplastic OS=Solanum tuberosum GN=SS2 PE=1 SV=3	SS2	1	1.08844e-13	135.63	GWVGFSVK(1)TSHR	2	-5.7751	23	1.258	1.264	1.264	1.023	1.028	0.945	1.201	1.019	0.986	0.752	0.891		0.94	1.091	1.135	0.907	0.903	0.93	0.675	0.851	0.89	0.953	1.009	1.084	1.06	1.043	1.013	0.772	0.762	0.76	1.041	1.041	1.044	0.951	0.941	0.903	1.045	1.015
Capana02g003365	636	K	SSY2_SOLTU Granule-bound starch synthase 2, chloroplastic/amyloplastic OS=Solanum tuberosum GN=SS2 PE=1 SV=3	SS2	1	0.0128703	40.533	QFECQHNDK(1)IR	2	-4.225	1																						1			1.06	1.043	1.013	0.772	0.762	0.76	1.041	1.041	1.044	0.951	0.941	0.903	1.045	1.015
Capana02g003365	239	K	SSY2_SOLTU Granule-bound starch synthase 2, chloroplastic/amyloplastic OS=Solanum tuberosum GN=SS2 PE=1 SV=3	SS2	1	0.00769565	57.888	ESSAQSHVK(1)QK	2	-7.8297	1								1																	1.06	1.043	1.013	0.772	0.762	0.76	1.041	1.041	1.044	0.951	0.941	0.903	1.045	1.015
Capana02g003376	6	K	CUL3A_ARATH Cullin-3A OS=Arabidopsis thaliana GN=CUL3A PE=1 SV=1	CUL3A	1	0.0115539	41.025	MSAQK(1)K(1)R	1	-14.774	2												0.969					1.031
Capana02g003376	450	K	CUL3A_ARATH Cullin-3A OS=Arabidopsis thaliana GN=CUL3A PE=1 SV=1	CUL3A	1	0.00619861	58.476	LK(1)TECGYQFTSK	2	-8.8986	1																1
Capana02g003376	5	K	CUL3A_ARATH Cullin-3A OS=Arabidopsis thaliana GN=CUL3A PE=1 SV=1	CUL3A	1	0.0115539	41.025	MSAQK(1)K(1)R	1	-14.774	2												0.969					1.031
Capana02g003379	311	K	TBA_PRUDU Tubulin alpha chain OS=Prunus dulcis GN=TUBA PE=2 SV=1	TUBA	1	2.07761e-07	104.39	HGK(1)YMACCLMYR	2	-5.2716	6	1.035	1.074	1.397		1.178							0.436									0.88				1.287	1.19	1.318	1.211	1.183	1.311	0.941	0.863	0.909	0.83	0.502	0.755	1.022	1.09
Capana02g003402	21	K	VDAC1_SOLTU Mitochondrial outer membrane protein porin of 34 kDa OS=Solanum tuberosum PE=1 SV=2	---	1	0.00486171	71.066	DLLYK(1)GYHTDHK	2	-8.3003	5						0.684				0.963	1.183					0.855						1.314			0.867	1.185	0.986	1.111	1.005	1.013	0.925	0.932	0.666	1.229	1.185	0.887	0.845	0.79
Capana02g003427	41	K	Y1719_ARATH Probable inactive receptor kinase At1g27190 OS=Arabidopsis thaliana GN=At1g27190 PE=1 SV=1	At1g27190	1	0.00502533	71.066	CLEGFK(1)NSIDDR	2	-0.12688	3					1.057											0.798					1.145				1.094	0.856	1.058	0.966	0.979	0.768	1.102	1.115	1.048	1.129	0.93	0.939	1.105	1.152
Capana02g003442	91	K	Putative B12D-like	---	1	0.00265458	55.782	AAGVLDNFSEGEK(1)YAEHALR	3	-2.35	3							1.077		1.025				0.898												0.865		0.793		0.915	0.646	1.012		1.088	1.3	1.083	1.11	0.888	0.669
Capana02g003444	201	K	SEC13_MOUSE Protein SEC13 homolog OS=Mus musculus GN=Sec13 PE=2 SV=3	Sec13	1	0.000151575	94.791	LASGGCDNTVK(1)VWK	2	-10.57	12					1.053						1.159		0.604			1.104	1.16	1.07	1.011	0.899	0.97	1.035	0.979	0.955	1.04	1.061	1.004	1.081	1.018	1.036	0.863	0.868	0.861	0.991	1.041	0.993	0.986	0.97
Capana02g003444	36	K	SEC13_MOUSE Protein SEC13 homolog OS=Mus musculus GN=Sec13 PE=2 SV=3	Sec13	1	2.2009e-05	72.075	IETGHNDTVHDVTMDYYGK(1)R	3	-0.48256	5	1.09	0.562		1.189																				1.159	1.04	1.061	1.004	1.081	1.018	1.036	0.863	0.868	0.861	0.991	1.041	0.993	0.986	0.97
Capana02g003455	581	K	NDUV1_ARATH NADH dehydrogenase [ubiquinone] flavoprotein 1, mitochondrial OS=Arabidopsis thaliana GN=At5g08530 PE=2 SV=1	At5g08530	1	0.000965907	55.782	LSYFYK(1)HESCGQCTPCR	2	5.8571	5		1.167			1.05												0.921					0.862			1.22	1.138	1.092	1.196	1.128	1.126	1.036	1.052	1.06	0.925	0.92	0.921	0.921	0.887
Capana02g003456	95	K	FTRC_ARATH Ferredoxin-thioredoxin reductase catalytic chain, chloroplastic OS=Arabidopsis thaliana GN=FTRC PE=2 SV=1	FTRC	1	9.01963e-34	146.48	HYDDK(1)AAEAQQGFWNCPCVPMR	3	-5.519	7					0.311				1.474	1.349		0.989	1.208						0.87					0.801		0.863	0.742	0.882	0.911	0.887	1.279	1.169		1.088	1.112	1.122	0.857	0.823
Capana02g003456	73	K	FTRC_ARATH Ferredoxin-thioredoxin reductase catalytic chain, chloroplastic OS=Arabidopsis thaliana GN=FTRC PE=2 SV=1	FTRC	1	3.78056e-06	99.276	GVTSVVIK(1)GLAEHK	2	-6.3801	9				0.886	0.932		1.005		1.158					0.981		0.64				1.097			1.154	1.146		0.863	0.742	0.882	0.911	0.887	1.279	1.169		1.088	1.112	1.122	0.857	0.823
Capana02g003456	79	K	FTRC_ARATH Ferredoxin-thioredoxin reductase catalytic chain, chloroplastic OS=Arabidopsis thaliana GN=FTRC PE=2 SV=1	FTRC	1	1.04623e-06	117.77	GLAEHK(1)DTLGAPLCPCR	2	-1.922	22	0.902	0.875	0.939	0.995	1.055	0.93	1.07	0.974		1.097		0.501	0.357	0.984	0.754		0.749	0.75	0.742	1.324	0.952	1.701	1.697	1.652		0.863	0.742	0.882	0.911	0.887	1.279	1.169		1.088	1.112	1.122	0.857	0.823
Capana02g003456	48	K	FTRC_ARATH Ferredoxin-thioredoxin reductase catalytic chain, chloroplastic OS=Arabidopsis thaliana GN=FTRC PE=2 SV=1	FTRC	1	0.00129942	85.813	K(1)FSEQYAR	2	-3.6588	13	0.96	0.87	0.788		1.059	1.189		1.052		1.071	1.039	1.114		1.149				0.737	0.833			1.14				0.863	0.742	0.882	0.911	0.887	1.279	1.169		1.088	1.112	1.122	0.857	0.823
Capana02g003474	361	K	5NG4_PINTA Auxin-induced protein 5NG4 OS=Pinus taeda PE=2 SV=1	---	1	0.0156989	61.194	FPLLHNYK(1)NESISNK	3	0.020744	1																1
Capana02g003486	354	K	CYP38_ARATH Peptidyl-prolyl cis-trans isomerase CYP38, chloroplastic OS=Arabidopsis thaliana GN=CYP38 PE=1 SV=1	CYP38	1	1.25811e-13	174.23	SK(1)ADHAIELLNK	2	-5.9449	24	0.874	0.907	0.907	0.852	0.828	0.795	1.058	0.968	1.028	1.136	1.13	1.112	0.939	0.96	0.933	0.865	0.834	0.856	0.962	1.103	1.126	1.268	1.298	1.26	0.931	0.897	0.875	0.755	0.745	0.756	1.133	1.112	1.113	1.247	1.259	1.245	0.868	0.853
Capana02g003489	360	K	FDH_SOLTU Formate dehydrogenase, mitochondrial OS=Solanum tuberosum GN=FDH1 PE=1 SV=2	FDH1	1	0.00597408	68.108	YFK(1)GEDFPAENYIVK	2	1.5414	1													1												0.891	0.837	0.806	0.834	0.808	0.779	0.794	0.842	0.849	1.029	1.066	1.08	0.999	0.977
Capana02g003489	352	K	FDH_SOLTU Formate dehydrogenase, mitochondrial OS=Solanum tuberosum GN=FDH1 PE=1 SV=2	FDH1	1	0.009865	57.888	YAAGTK(1)DMLDR	2	-7.3014	7												0.873		1.02	0.964	0.927	0.86	1.123					1.233		0.891	0.837	0.806	0.834	0.808	0.779	0.794	0.842	0.849	1.029	1.066	1.08	0.999	0.977
Capana02g003489	214	K	FDH_SOLTU Formate dehydrogenase, mitochondrial OS=Solanum tuberosum GN=FDH1 PE=1 SV=2	FDH1	1	6.81522e-07	127.03	LK(1)PFNCNLLYHDR	2	-4.3057	57	0.682	0.633	0.63	1.26	0.984	1.115	0.709	0.807	0.939	0.785	0.736	0.856	1.343	0.936	0.979	1.323	1.004	1.01	1.015	0.871	0.867	1.445	1.61	1.461	0.891	0.837	0.806	0.834	0.808	0.779	0.794	0.842	0.849	1.029	1.066	1.08	0.999	0.977
Capana02g003489	195	K	FDH_SOLTU Formate dehydrogenase, mitochondrial OS=Solanum tuberosum GN=FDH1 PE=1 SV=2	FDH1	1	0.00357224	44.571	AYDLEGK(1)TVGTVGAGR	2	-8.3258	2				1.06														0.94							0.891	0.837	0.806	0.834	0.808	0.779	0.794	0.842	0.849	1.029	1.066	1.08	0.999	0.977
Capana02g003498	147	K	CAHC_TOBAC Carbonic anhydrase, chloroplastic OS=Nicotiana tabacum PE=2 SV=1	---	1	1.81715e-32	175.68	GQSPK(1)FMVFACSDSR	2	5.9481	89	0.283	0.358	0.746		0.745	0.609	0.588	1.074	0.833	2.028	0.909	1.22	1.915	0.973	1.008	1.209	1.08	1.552	0.727	0.638		1.1	1.132	1.272	0.787	0.816	0.845	0.823	0.873	0.884	1.047	1.046	1.026	0.966	0.984	0.983	1.012	1.002
Capana02g003498	104	K	CAHC_TOBAC Carbonic anhydrase, chloroplastic OS=Nicotiana tabacum PE=2 SV=1	---	1	2.45195e-05	115.35	VDQITAELK(1)SSDGGK	2	4.7652	7								0.937	0.746			1.383							0.465				1.469		0.787	0.816	0.845	0.823	0.873	0.884	1.047	1.046	1.026	0.966	0.984	0.983	1.012	1.002
Capana02g003498	85	K	CAHC_TOBAC Carbonic anhydrase, chloroplastic OS=Nicotiana tabacum PE=2 SV=1	---	1	0.0179135	72.846	LLSEK(1)GELGPVVAAR	2	-6.6165	3				0.66						0.906														1.434	0.787	0.816	0.845	0.823	0.873	0.884	1.047	1.046	1.026	0.966	0.984	0.983	1.012	1.002
Capana02g003498	291	K	CAHC_TOBAC Carbonic anhydrase, chloroplastic OS=Nicotiana tabacum PE=2 SV=1	---	1	0.0190813	76.85	DGLVNK(1)TLALK	2	-7.5462	1								1																	0.787	0.816	0.845	0.823	0.873	0.884	1.047	1.046	1.026	0.966	0.984	0.983	1.012	1.002
Capana02g003498	142	K	CAHC_TOBAC Carbonic anhydrase, chloroplastic OS=Nicotiana tabacum PE=2 SV=1	---	1	9.39998e-149	193.56	YDK(1)NPELYGELAK(1)GQSPK	2	1.8311	80	1.062	1.036	0.977	0.986	0.894	1.2	1.216	1.018	1.245	1.161	0.93	1.215	0.776	0.865	0.986	1.022	0.995	1.052	1.035	0.882	0.865	0.84	0.869	0.875	0.787	0.816	0.845	0.823	0.873	0.884	1.047	1.046	1.026	0.966	0.984	0.983	1.012	1.002
Capana02g003498	129	K	CAHC_TOBAC Carbonic anhydrase, chloroplastic OS=Nicotiana tabacum PE=2 SV=1	---	1	6.89249e-143	248.76	TEK(1)YDK(1)NPELYGELAK	2	5.1283	99	0.763	0.902	0.446	1.779	0.584	0.966	1.288	1.538	1.498	1.122	0.57	1.203	1.149	0.787	0.961	1.06	0.957	0.947	0.766	0.397	0.416	1.196	1.059	1.646	0.787	0.816	0.845	0.823	0.873	0.884	1.047	1.046	1.026	0.966	0.984	0.983	1.012	1.002
Capana02g003498	249	K	CAHC_TOBAC Carbonic anhydrase, chloroplastic OS=Nicotiana tabacum PE=2 SV=1	---	1	3.9859e-31	126.63	AK(1)VLEEHGDKDFAYQCK	3	-6.7427	27	0.933	0.988	0.968	0.928	0.876	0.921	0.976		0.938	0.828	0.866		0.969	1.018	0.993	0.846		0.815	0.915	0.955	0.988	1.31	1.511	1.457	0.787	0.816	0.845	0.823	0.873	0.884	1.047	1.046	1.026	0.966	0.984	0.983	1.012	1.002
Capana02g003498	119	K	CAHC_TOBAC Carbonic anhydrase, chloroplastic OS=Nicotiana tabacum PE=2 SV=1	---	1	2.79477e-85	191.95	GFDPVEHMK(1)AGFIHFK	3	-6.8406	72	1.072	0.722	0.802	0.85	0.818	0.823	1.243	1.29	1.204	1.104	0.865	0.877	1.052	0.782	0.855	0.963	0.938	0.914	0.981	0.938	0.893	1.427	1.279	1.309	0.787	0.816	0.845	0.823	0.873	0.884	1.047	1.046	1.026	0.966	0.984	0.983	1.012	1.002
Capana02g003498	132	K	CAHC_TOBAC Carbonic anhydrase, chloroplastic OS=Nicotiana tabacum PE=2 SV=1	---	1	3.06511e-21	144.09	YDK(1)NPELYGELAK(1)GQSPK	2	1.8311	125	0.926	1.155	0.974	1.058	0.855	0.899	1.253	0.821	0.345	1.105	1.113	0.954	0.858	0.877	1.067	0.985	1.094	1.005	1.081	1.141	1.076	1.174	1.049	1.136	0.787	0.816	0.845	0.823	0.873	0.884	1.047	1.046	1.026	0.966	0.984	0.983	1.012	1.002
Capana02g003498	264	K	CAHC_TOBAC Carbonic anhydrase, chloroplastic OS=Nicotiana tabacum PE=2 SV=1	---	1	2.90142e-119	207.41	VLEEHGDK(1)DFAYQCK(1)ACEK	3	-1.0291	43	0.998	1.01	0.988	1.023	0.915	1.052	1.025	0.99	1.034	0.859	0.868	0.906	0.975	0.932	0.925	0.864	0.871	0.84	1.081	1.011	1.051	1.239	1.295	1.248	0.787	0.816	0.845	0.823	0.873	0.884	1.047	1.046	1.026	0.966	0.984	0.983	1.012	1.002
Capana02g003498	257	K	CAHC_TOBAC Carbonic anhydrase, chloroplastic OS=Nicotiana tabacum PE=2 SV=1	---	1	1.16299e-142	226.85	VLEEHGDK(1)DFAYQCK(1)ACEK	3	-1.0291	93	0.785	0.817	0.824	0.879	0.891	0.852	0.763	0.908	0.924	0.799	0.957	0.866	0.852	0.918	0.934	0.956	0.993	1.027	0.9	0.934	0.883	1.699	1.829	1.806	0.787	0.816	0.845	0.823	0.873	0.884	1.047	1.046	1.026	0.966	0.984	0.983	1.012	1.002
Capana02g003498	126	K	CAHC_TOBAC Carbonic anhydrase, chloroplastic OS=Nicotiana tabacum PE=2 SV=1	---	1	0.000174951	124.81	AGFIHFK(1)TEK(1)YDK(1)NPELYGELAK	3	0.9085	41	0.79	1.075	0.821	1.17	0.908	0.9	1.105	0.848	1.15	0.937	1.166	1.161	0.893	0.973	1.218	0.866	0.989	0.891	0.871	0.896	0.914	1.119	1.154	1.183	0.787	0.816	0.845	0.823	0.873	0.884	1.047	1.046	1.026	0.966	0.984	0.983	1.012	1.002
Capana02g003498	110	K	CAHC_TOBAC Carbonic anhydrase, chloroplastic OS=Nicotiana tabacum PE=2 SV=1	---	1	1.11081e-109	219.16	SSDGGK(1)GFDPVEHMK	2	-6.6195	30		0.884	0.935	0.81	0.88	0.839	0.926	0.718	0.908	0.936	0.923	0.934	0.901	1.003	0.977	0.798	0.923	0.902	0.99	0.897	0.982	1.672	1.546	1.714	0.787	0.816	0.845	0.823	0.873	0.884	1.047	1.046	1.026	0.966	0.984	0.983	1.012	1.002
Capana02g003506	501	K	ATM_ARATH Serine/threonine-protein kinase ATM OS=Arabidopsis thaliana GN=ATM PE=2 SV=1	ATM	1	0.000214716	82.437	TTIGDSTPSSVETSEK(1)K	2	-4.6921	9	0.991	1.193	1.109						0.514				1.11		1.086	0.976	1.107	0.914										1.154	0.829	0.919	0.832			0.693	1.036		0.864
Capana02g003507	174	K	RK12_NICSY 50S ribosomal protein L12, chloroplastic OS=Nicotiana sylvestris PE=2 SV=1	---	1	3.7649e-145	224.09	EGVSQEEAEEAK(1)K	2	-7.5449	27	0.642	0.576	0.706			0.699	0.774	0.723	0.798	1.289	1.239	1.212	0.777	0.88		0.827	0.832	0.764	1.242	1.104	1.26		1.871	1.789	0.659	0.651	0.638	0.794	0.781	0.785	0.718	0.733	0.732	1.363	1.356	1.355	0.912	0.922
Capana02g003507	162	K	RK12_NICSY 50S ribosomal protein L12, chloroplastic OS=Nicotiana sylvestris PE=2 SV=1	---	1	6.96743e-06	149.02	FK(1)EGVSQEEAEEAK	2	-5.0592	26				0.454	0.59	0.522	0.787	0.689		0.995	1.116	1.102		0.638		0.467				0.876	1.054	2.363	2.347		0.659	0.651	0.638	0.794	0.781	0.785	0.718	0.733	0.732	1.363	1.356	1.355	0.912	0.922
Capana02g003507	160	K	RK12_NICSY 50S ribosomal protein L12, chloroplastic OS=Nicotiana sylvestris PE=2 SV=1	---	0.826862	6.96743e-06	175.68	K(0.827)FK(0.173)EGVSQEEAEEAKK	3	-3.714	17	0.638	0.606	0.616	0.497	0.646	0.572	0.862	0.754		1.09	1.223	1.207				0.512		0.544		0.96	1.155		2.57	2.547	0.659	0.651	0.638	0.794	0.781	0.785	0.718	0.733	0.732	1.363	1.356	1.355	0.912	0.922
Capana02g003509	393	K	MDAR2_ARATH Probable monodehydroascorbate reductase, cytoplasmic isoform 2 OS=Arabidopsis thaliana GN=At3g27820 PE=2 SV=1	At3g27820	1	0.0107646	61.067	GHVVGSFLEGGTK(1)EEYK	2	2.0915	5		1.035				0.999	0.922				1.111			0.933											1.086	1.125	1.103	1.212	1.201	1.117	1.232	1.319	1.298	0.945	0.937	0.975	1.015	0.939
Capana02g003521	432	K	IDHP_MEDSA Isocitrate dehydrogenase [NADP], chloroplastic (Fragment) OS=Medicago sativa PE=2 SV=1	---	1	0.00198584	50.09	MTK(1)DLAILAHGPK	2	-6.537	1																							1		0.794	0.759	0.78	0.867	0.818	0.857	0.89	0.905	0.897	0.981	1.034	0.985	1.076	1.112
Capana02g003546	3430	K	titin isoform X2	---	0.999278	2.14101e-06	104.86	LAIAETFEEK(0.999)PQEPAIEEK(0.001)HK	3	-1.6261	10							1.512	1.432	1.24		0.918	0.97			0.382	0.52		0.486	1.295		1.247				1.068	0.922	0.846	0.773	0.717	0.681	1.711	1.879	1.801	1.156	1.111	1.112	0.809	0.748
Capana02g003546	3439	K	titin isoform X2	---	0.799068	0.00117054	52.201	LAIAETFEEK(0.201)PQEPAIEEK(0.799)HK	3	-1.2189	1																				1					1.068	0.922	0.846	0.773	0.717	0.681	1.711	1.879	1.801	1.156	1.111	1.112	0.809	0.748
Capana02g003553	96	K	AIM32_DEBHA Altered inheritance of mitochondria protein 32 OS=Debaryomyces hansenii (strain ATCC 36239 / CBS 767 / JCM 1990 / NBRC 0083 / IGC 2968) GN=AIM32 PE=3 SV=2	AIM32	1	6.56699e-05	46.276	VTACSHIGGHK(1)YAGNVIIFSSGK	3	-6.0662	1					1																							0.919
Capana02g003559	11	K	GLAK1_ARATH Glucuronokinase 1 OS=Arabidopsis thaliana GN=GLCAK1 PE=1 SV=1	GLCAK1	1	4.86164e-05	101.48	QSMVIEHK(1)SYAR	2	-7.2045	9		1.297	1.133	1.063	1.051	1.12			0.538				1.144					0.602				1.051			0.955	0.959	0.943	1.08	1.114	1.084	0.846	0.773	0.835	0.847	0.858	0.921	0.913	0.867
Capana02g003571	59	K	SURF2_HUMAN Surfeit locus protein 2 OS=Homo sapiens GN=SURF2 PE=1 SV=3	SURF2	1	0.000599906	69.716	ESYAQSK(1)HCR	2	-7.877	1		1
Capana02g003587	240	K	DHSB2_ARATH Succinate dehydrogenase [ubiquinone] iron-sulfur subunit 2, mitochondrial OS=Arabidopsis thaliana GN=SDH2-2 PE=1 SV=2	SDH2-2	1	0.0132261	47.334	LDAINDEFK(1)LYR	2	-5.2355	4													1.289	0.826	1.103								0.782		0.767	0.908	0.866	0.979	0.967	1.024	0.979	0.982	0.935	0.916	0.938	0.89	1.053	1.004
Capana02g003587	83	K	DHSB2_ARATH Succinate dehydrogenase [ubiquinone] iron-sulfur subunit 2, mitochondrial OS=Arabidopsis thaliana GN=SDH2-2 PE=1 SV=2	SDH2-2	1	8.69839e-13	129.69	IK(1)NEIDPSLTFR	2	0.22032	38	0.705	0.765				1.295		0.777		0.878	0.731	0.694	1.272	1.18	1.108	0.939	1.119	0.99	0.855	0.867	0.808	1.523		1.495	0.767	0.908	0.866	0.979	0.967	1.024	0.979	0.982	0.935	0.916	0.938	0.89	1.053	1.004
Capana02g003587	262	K	DHSB2_ARATH Succinate dehydrogenase [ubiquinone] iron-sulfur subunit 2, mitochondrial OS=Arabidopsis thaliana GN=SDH2-2 PE=1 SV=2	SDH2-2	1	6.88864e-13	127.94	GLNPGK(1)HIQNIK	2	-7.7274	22		1.168	1.216	1.302	1.292	1.216	0.862	0.82	0.797	0.825	0.882	0.834	1.179		1.252	0.931	0.9	0.936	0.821	0.974	0.911	0.885	1.007	0.99	0.767	0.908	0.866	0.979	0.967	1.024	0.979	0.982	0.935	0.916	0.938	0.89	1.053	1.004
Capana02g003587	268	K	DHSB2_ARATH Succinate dehydrogenase [ubiquinone] iron-sulfur subunit 2, mitochondrial OS=Arabidopsis thaliana GN=SDH2-2 PE=1 SV=2	SDH2-2	1	0.0122727	76.833	HIQNIK(1)R	2	-3.9409	5			0.993		0.821																	1.073	1.065	1.049	0.767	0.908	0.866	0.979	0.967	1.024	0.979	0.982	0.935	0.916	0.938	0.89	1.053	1.004
Capana02g003611	164	K	G6PD_SOLTU Glucose-6-phosphate 1-dehydrogenase, cytoplasmic isoform OS=Solanum tuberosum GN=G6PDH PE=2 SV=1	G6PDH	1	2.24669e-06	114.93	SYCMNK(1)SDLGGWTR	2	-0.2629	24	1.213	1.023	1.233	1.337	1.366	1.423	1.075	1.185	1.109		0.816	0.923	0.857	0.801	0.85	0.824	1.041	0.985		0.711			0.228		1.308	1.208	1.144	1.26	1.157	1.22	1.137	1.104	1.143	1.109	1.103	1.098	0.838	0.85
Capana02g003637	95	K	RR21_SPIOL 30S ribosomal protein S21, chloroplastic (Fragment) OS=Spinacia oleracea GN=rps21 PE=1 SV=1	rps21	1	0.00373204	74.486	AGVIQECK(1)R	2	-9.6693	8												0.843	1.42		1.058	1.073	0.981	0.987				0.719	0.919		0.517	0.883	0.634		0.477	0.317	0.545	0.634	0.551	0.694	1.049			1.36
Capana02g003641	89	K	SUOX_ARATH Sulfite oxidase OS=Arabidopsis thaliana GN=SOX PE=1 SV=1	SOX	1	0.0014727	81.48	LPK(1)YTVTATLQCAGNR	2	-4.7458	2			0.965												1.035										1.052	1.004	1.029	1.085	1.105	1.035	1.008	0.965	1.02	1.155	1.086	1.035	1.01	0.992
Capana02g003696	161	K	MPCP_MOUSE Phosphate carrier protein, mitochondrial OS=Mus musculus GN=Slc25a3 PE=1 SV=1	Slc25a3	1	3.95249e-98	248.69	YYSDLAGAENAAK(1)YK	2	-6.5036	42	0.95	0.922	0.968	1.102	1.233	1.257	0.818	0.801	0.836	0.796	0.755	0.841	1.286	1.292	1.236	1.246		1.196	0.713	0.679	0.781	1.024	1.068	1.201	0.868	0.891	0.955	1.11	1.138	1.192	0.822	0.745	0.788	0.745	0.777	0.721	1.147	1.163
Capana02g003696	148	K	MPCP_MOUSE Phosphate carrier protein, mitochondrial OS=Mus musculus GN=Slc25a3 PE=1 SV=1	Slc25a3	1	1.27904e-12	166.71	K(1)YYSDLAGAENAAK	2	-3.3941	8	1.09				1.304	1.393						0.491					0.742					1.126	0.967	0.887	0.868	0.891	0.955	1.11	1.138	1.192	0.822	0.745	0.788	0.745	0.777	0.721	1.147	1.163
Capana03g000028	124	K	glutamyl-tRNA reductase-binding protein, chloroplastic isoform X1	---	1	4.81952e-15	92.178	FAVDPHGSPLIFLNHSTSK(1)FAPDSK	3	-1.7022	13	1.324			1.119				1.288	1.293		0.954	0.875	0.932					0.86	1.029	0.993	0.941	0.682		0.711	1.127	1.116	1.098	1.171	1.122	1.175	0.978	1.058	1.063	1.18	1.031	1.137	0.933	0.908
Capana03g000028	163	K	glutamyl-tRNA reductase-binding protein, chloroplastic isoform X1	---	0.999954	3.37919e-06	102.1	TPQCTILGTLQKPLDATALK(1)K	3	-7.02	10			1.211	1.276				1.101	1.075	0.87		0.867								0.873	0.731		1.152	0.843	1.127	1.116	1.098	1.171	1.122	1.175	0.978	1.058	1.063	1.18	1.031	1.137	0.933	0.908
Capana03g000028	171	K	glutamyl-tRNA reductase-binding protein, chloroplastic isoform X1	---	1	0.0175622	56.378	LHSVWEK(1)R	2	-5.3739	1					1																				1.127	1.116	1.098	1.171	1.122	1.175	0.978	1.058	1.063	1.18	1.031	1.137	0.933	0.908
Capana03g000046	133	K	RBPS2_MOUSE RNA-binding protein with multiple splicing 2 OS=Mus musculus GN=Rbpms2 PE=1 SV=1	Rbpms2	1	2.04765e-46	181.87	GIVADSNAHDPSK(1)R	2	-5.5679	19	0.559	0.658	0.861		0.693	0.775	0.978	0.831		0.848	1.498	1.257	0.32				0.423	0.887	0.458	1.602	1.326	1.622	1.538	1.866	0.723	0.824	0.882	1.045	1.132	0.946	0.761	0.769	0.78	1.015	1.036	1.043	1.093	0.847
Capana03g000047	570	K	SERA_ARATH D-3-phosphoglycerate dehydrogenase, chloroplastic OS=Arabidopsis thaliana GN=At1g17745 PE=1 SV=2	At1g17745	1	0.0158609	51.872	VK(1)YGVPHLTR	2	-5.0824	1																						1			1.11	1.15	1.124	1.182	1.193	1.192	0.918	0.946	0.917	1.153	1.169	1.159	0.867	0.86
Capana03g000054	506	K	PDS_CAPAN 15-cis-phytoene desaturase, chloroplastic/chromoplastic OS=Capsicum annuum GN=PDS PE=1 SV=1	PDS	1	0.0201399	41.025	YHVVK(1)TPR	2	-4.7552	1																								1	0.974	0.989	1.015	1.047	1.06	1.074	1.027	1.089	1.055	0.923	0.902	0.973	0.941	0.895
Capana03g000054	542	K	PDS_CAPAN 15-cis-phytoene desaturase, chloroplastic/chromoplastic OS=Capsicum annuum GN=PDS PE=1 SV=1	PDS	1	0.018228	54.309	QK(1)YLASMEGAVLSGK	2	3.6385	2			0.887																1.113						0.974	0.989	1.015	1.047	1.06	1.074	1.027	1.089	1.055	0.923	0.902	0.973	0.941	0.895
Capana03g000067	68	K	NDBAA_ARATH NADH dehydrogenase [ubiquinone] 1 beta subcomplex subunit 10-A OS=Arabidopsis thaliana GN=At1g49140 PE=3 SV=1	At1g49140	1	5.73625e-08	144.47	IEGVNHLQK(1)CR	2	-8.3023	19		0.922	0.975	0.812	0.914	1.058		0.589	0.697		1.154		0.858	0.796	0.923	0.656	0.518		0.838	0.894	0.789	2.033	1.791	1.784	1.372	0.885	0.876	0.902	0.921	0.891	0.742	0.705	0.834	1.239	1.242	1.266	0.723	0.744
Capana03g000068	365	K	PMEU1_SOLLC Pectinesterase/pectinesterase inhibitor U1 OS=Solanum lycopersicum GN=PMEU1 PE=2 SV=1	PMEU1	1	3.85225e-05	53.21	NVQDGSTTFHSATVAAVGEK(1)FLAR	3	-1.4144	4		0.752																				1.179	0.866	1.203	1.146	1.137	1.086	1.149	1.104	1.146	0.916	0.957	0.879	1.171	1.103	1.118	0.851	0.862
Capana03g000068	498	K	PMEU1_SOLLC Pectinesterase/pectinesterase inhibitor U1 OS=Solanum lycopersicum GN=PMEU1 PE=2 SV=1	PMEU1	1	0.0114504	89.123	PWK(1)EYSR	2	-3.22	1														1											1.146	1.137	1.086	1.149	1.104	1.146	0.916	0.957	0.879	1.171	1.103	1.118	0.851	0.862
Capana03g000068	204	K	PMEU1_SOLLC Pectinesterase/pectinesterase inhibitor U1 OS=Solanum lycopersicum GN=PMEU1 PE=2 SV=1	PMEU1	1	1.1609e-48	129.03	TLISSAITNQETCLDGFSHDEADK(1)K	3	0.49002	14	0.718	1.136		1.101	1.096	0.981	0.871	1.16	1.202	1.132	0.884					0.918						1.035	0.888	0.879	1.146	1.137	1.086	1.149	1.104	1.146	0.916	0.957	0.879	1.171	1.103	1.118	0.851	0.862
Capana03g000068	452	K	PMEU1_SOLLC Pectinesterase/pectinesterase inhibitor U1 OS=Solanum lycopersicum GN=PMEU1 PE=2 SV=1	PMEU1	1	2.20287e-11	115.79	RPGSGQK(1)NMVTAQGR	2	-5.3053	4		1.051	1.159			0.933																	0.857		1.146	1.137	1.086	1.149	1.104	1.146	0.916	0.957	0.879	1.171	1.103	1.118	0.851	0.862
Capana03g000068	487	K	PMEU1_SOLLC Pectinesterase/pectinesterase inhibitor U1 OS=Solanum lycopersicum GN=PMEU1 PE=2 SV=1	PMEU1	1	1.86192e-05	78.673	IGATSDLRPVQK(1)SFPTYLGR	3	-9.2546	3						1.301				0.981							0.717								1.146	1.137	1.086	1.149	1.104	1.146	0.916	0.957	0.879	1.171	1.103	1.118	0.851	0.862
Capana03g000068	381	K	PMEU1_SOLLC Pectinesterase/pectinesterase inhibitor U1 OS=Solanum lycopersicum GN=PMEU1 PE=2 SV=1	PMEU1	1	3.31567e-162	202.58	DITFQNTAGAAK(1)HQAVALR	2	-2.1609	34	1.095		1.104	1.379	1.295	1.377		0.544	0.536	0.669	1.318		1.051			1.018	0.984	0.998	0.687	0.626	0.656	0.977	1.303	1.383	1.146	1.137	1.086	1.149	1.104	1.146	0.916	0.957	0.879	1.171	1.103	1.118	0.851	0.862
Capana03g000068	555	K	PMEU1_SOLLC Pectinesterase/pectinesterase inhibitor U1 OS=Solanum lycopersicum GN=PMEU1 PE=2 SV=1	PMEU1	1	2.10339e-05	113.48	GFK(1)VITSATEAQAYTPGR	2	-4.3187	12					0.57	0.961		0.825		0.756	0.471		0.756				0.92	0.787	0.687			1.678	1.992	1.596	1.146	1.137	1.086	1.149	1.104	1.146	0.916	0.957	0.879	1.171	1.103	1.118	0.851	0.862
Capana03g000068	473	K	PMEU1_SOLLC Pectinesterase/pectinesterase inhibitor U1 OS=Solanum lycopersicum GN=PMEU1 PE=2 SV=1	PMEU1	1	7.33783e-73	199.51	TDPNQNTGIVIQK(1)CR	2	-5.7736	24	0.957		1.217	1.215	1.643	1.223	0.73			0.834	0.957		0.936	0.996	0.856	0.191	0.775	0.976	0.895	0.592	0.608	1.461	1.479	1.459	1.146	1.137	1.086	1.149	1.104	1.146	0.916	0.957	0.879	1.171	1.103	1.118	0.851	0.862
Capana03g000079	91	K	HS174_ARATH 17.4 kDa class III heat shock protein OS=Arabidopsis thaliana GN=HSP17.4B PE=2 SV=1	HSP17.4B	1	0.00457922	64.064	EESEEEGCK(1)YLR	2	7.414	2				1.378																		0.622
Capana03g000094	199	K	AB19A_PRUPE Auxin-binding protein ABP19a OS=Prunus persica GN=ABP19A PE=3 SV=1	ABP19A	1	1.26643e-54	197.3	LVGATTFLDEATIK(1)K	2	-4.4184	21	0.802	0.485	0.526	0.839	0.688	0.557		0.604	0.582	0.82	0.565	0.542	1.041		0.61	1.165	1.24	1.071	0.946		0.821	2.524	2.263	2.308	0.78	0.834	0.887	0.921	0.927	0.955	1.056	1.118	1.046	0.897	0.863	0.909	1.017	0.986
Capana03g000109	325	K	AL7A1_MALDO Aldehyde dehydrogenase family 7 member A1 OS=Malus domestica PE=1 SV=3	---	1	0.00167673	103.69	VLKPLADVYK(1)QVK	2	1.9409	11		0.949		1.05						0.896	0.91			1.097	1.131	1.146	1.133	1.123				0.762	0.803		0.949	0.9	0.869	1.031	0.991	1.006	0.891	0.887	0.947	0.923	0.851	0.892	1.111	1.132
Capana03g000118	87	K	TIAR_HUMAN Nucleolysin TIAR OS=Homo sapiens GN=TIAL1 PE=1 SV=1	TIAL1	1	4.13124e-05	93.772	DK(1)SSYGFVHYYDR	2	-2.2551	7			0.964		1.125	0.972								0.939											1.096	1.083	1.008	1.245	1.309	1.212	0.651	0.695	0.701	0.86	0.885	0.91	0.59	0.899
Capana03g000136	498	K	PDAT1_ARATH Phospholipid:diacylglycerol acyltransferase 1 OS=Arabidopsis thaliana GN=PDAT1 PE=2 SV=1	PDAT1	1	0.000382727	92.707	YSHYK(1)YWSNPLETK	2	-2.5502	21	1.314	1.444	1.302	1.403	1.493	1.298		0.932	1.03		0.965				0.964	0.895	0.816		0.761	0.919	0.546	0.436		0.481	1.24	1.132	1.139	1.128	1.073	1.097	1.059	1.112	1.094	0.923	0.943	0.914	1.053	1.037
Capana03g000136	493	K	PDAT1_ARATH Phospholipid:diacylglycerol acyltransferase 1 OS=Arabidopsis thaliana GN=PDAT1 PE=2 SV=1	PDAT1	1	0.00203711	44.16	GSAHFSYGIADDLDDPK(1)YSHYK	3	-7.6833	1			1																						1.24	1.132	1.139	1.128	1.073	1.097	1.059	1.112	1.094	0.923	0.943	0.914	1.053	1.037
Capana03g000142	484	K	THRC_SOLTU Threonine synthase, chloroplastic OS=Solanum tuberosum PE=2 SV=1	---	1	0.0198783	55.604	IDYHSK(1)EINDMECR	2	-1.2183	2			1.488		0.512																				1.187	1.138	1.028	1.095	0.971	0.997	0.985	1.096	1.127	0.99	0.984	0.926	1.012	1.047
Capana03g000142	188	K	THRC_SOLTU Threonine synthase, chloroplastic OS=Solanum tuberosum PE=2 SV=1	---	1	1.68234e-05	52.773	QFLGMSDLWVK(1)HCGISHTGSFK	3	-1.7265	2			0.845	1.155																					1.187	1.138	1.028	1.095	0.971	0.997	0.985	1.096	1.127	0.99	0.984	0.926	1.012	1.047
Capana03g000142	478	K	THRC_SOLTU Threonine synthase, chloroplastic OS=Solanum tuberosum PE=2 SV=1	---	1	3.73271e-06	106.35	FTQSK(1)IDYHSK	2	6.5956	22	1.431	1.479	1.452	1.489	1.559	1.437	0.797	0.791	0.836	0.714	0.805	0.716	1.354		1.454	0.763		0.77	0.717	0.801	0.792		0.414	0.43	1.187	1.138	1.028	1.095	0.971	0.997	0.985	1.096	1.127	0.99	0.984	0.926	1.012	1.047
Capana03g000153	30	K	COPZ3_ARATH Coatomer subunit zeta-3 OS=Arabidopsis thaliana GN=At4g08520 PE=2 SV=1	At4g08520	1	0.000309794	66.485	VAVK(1)YYSDDWPTNSAK	2	-2.755	8							0.461			0.443	0.437			0.511	0.93					4.226	0.509		0.483		1.101	1.071	0.979	0.986	1.045	1.049	0.991	0.859	0.986	0.972	0.996	1.047	1.033	1.028
Capana03g000162	358	K	YHKF_SCHPO Uncharacterized RNA-binding protein C660.15 OS=Schizosaccharomyces pombe (strain 972 / ATCC 24843) GN=SPBC660.15 PE=2 SV=1	SPBC660.15	1	0.00136401	65.421	GYDSGGSTGGAK(1)AYGNGAAAGGR	2	-9.67	1																							1		0.998	0.969	0.877	0.925	0.936	0.94	0.774	0.7	0.787	1.156	1.146	1.207	0.876	0.89
Capana03g000163	254	K	GLYR1_CHICK Putative oxidoreductase GLYR1 OS=Gallus gallus GN=GLYR1 PE=2 SV=1	GLYR1	1	1.24806e-54	183.57	SSYPTAFPLK(1)HQQK(1)DLR	3	3.1613	48	0.907	0.969	1.035	1.193	0.829		0.953	0.742	1.032	0.969	0.516	0.98	1.069	1.1	1.093	0.938	0.9	0.902	0.871	0.928	0.902	1.365	1.479	1.328	0.838	0.853	0.812	0.951	0.945	0.922	1.052	1.058	1.101	0.93	0.974	0.956	0.807	0.876
Capana03g000163	244	K	GLYR1_CHICK Putative oxidoreductase GLYR1 OS=Gallus gallus GN=GLYR1 PE=2 SV=1	GLYR1	1	0.000595735	111.98	GPSMVK(1)SSYPTAFPLK	2	-3.8328	17	1.04	1.214	1.186	1.114		1.099	0.907	0.863			0.846	1.006	1.001	1.188	1.217			0.777	0.728		0.542	1.061	1.212		0.838	0.853	0.812	0.951	0.945	0.922	1.052	1.058	1.101	0.93	0.974	0.956	0.807	0.876
Capana03g000163	65	K	GLYR1_CHICK Putative oxidoreductase GLYR1 OS=Gallus gallus GN=GLYR1 PE=2 SV=1	GLYR1	1	0.00379233	93.649	SKCEPLISLGAK(1)YK	2	-5.7833	6	0.842	1		0.903	1.236									1.08	0.939										0.838	0.853	0.812	0.951	0.945	0.922	1.052	1.058	1.101	0.93	0.974	0.956	0.807	0.876
Capana03g000163	288	K	GLYR1_CHICK Putative oxidoreductase GLYR1 OS=Gallus gallus GN=GLYR1 PE=2 SV=1	GLYR1	1	1.52078e-06	115.29	VAK(1)SHGLSDQDFSAVIEALK	3	-5.9326	27	1.189	1.032	0.503	1.379	1.326	1.278	1.592	1.145	2.155	1.313	1.25	1.163	0.709	0.193	0.267				0.972	0.562	0.754	1.335	0.399	0.486	0.838	0.853	0.812	0.951	0.945	0.922	1.052	1.058	1.101	0.93	0.974	0.956	0.807	0.876
Capana03g000163	258	K	GLYR1_CHICK Putative oxidoreductase GLYR1 OS=Gallus gallus GN=GLYR1 PE=2 SV=1	GLYR1	1	0.0015893	117.39	SSYPTAFPLK(1)HQQK(1)DLR	3	3.1613	22	1.058	0.836	0.96	0.917	1.003	0.946	0.905	0.978	1.425	0.955	1.051	0.969	0.934	0.929		0.794	0.432	0.784	0.98	0.924		1.448		1.77	0.838	0.853	0.812	0.951	0.945	0.922	1.052	1.058	1.101	0.93	0.974	0.956	0.807	0.876
[truncated: 3,321 more rows]
[truncated: 34 more columns]
