# Supplementary material for: Comprehensive Proteome and Lysine Acetylome Analysis Reveals the Widespread Involvement of Acetylation in Cold Resistance of Pepper (Capsicum annuum L.)
Source: Front Plant Sci. 2021 Aug 27;12:730489. doi: 10.3389/fpls.2021.730489 (PMC8429487; doi:10.3389/fpls.2021.730489)
Supplement: Supplementary Table 5 — Statistics of differentially expressed acetylated proteins under cold stress. [file Table_5.XLSX]

## Sheet: Sheet1
Table S5. Statistics of differentially expressed acetylated proteins under cold stress
Protein accession	Position	A2/A1 Ratio	Regulated Type	A2/A1 P value	Amino acid	Protein description	Gene name	Localization probability	PEP	Score	Modified sequence	Charge	Mass error [ppm]	MS/MS Count	A188												A122
															T0_1	T0_2	T0_3	T1_1	T1_2	T1_3	T2_1	T2_2	T2_3	R1_1	R1_2	R1_3	T0_1	T0_2	T0_3	T1_1	T1_2	T1_3	T2_1	T2_2	T2_3	R1_1	R1_2	R1_3	Subcellular localization	Biological Process	Cellular Component	Molecular Function	KEGG KO No.	KEGG Gene	KEGG pathway	Pfam ID	Domain description
Capana00g000428	140	0.628949	Down	0.02216	K	H2A_PETCR Histone H2A OS=Petroselinum crispum PE=2 SV=1	---	1	0.00181036	120.65	SPSK(1)ATK(1)SPK	2	-4.8969	10		0.972533	0.957627	0.649493		0.564479							1.31499	1.1058		1.33022	1.06706	1.09501	0.590708						nucleus		GO:0005622 intracellular; GO:0005623 cell; GO:0005634 nucleus; GO:0005694 chromosome; GO:0043226 organelle; GO:0043227 membrane-bounded organelle; GO:0043228 non-membrane-bounded organelle; GO:0043229 intracellular organelle; GO:0043231 intracellular membrane-bounded organelle; GO:0043232 intracellular non-membrane-bounded organelle; GO:0044424 intracellular part; GO:0044464 cell part;		K11251	H2A; histone H2A		PF00125	Core histone H2A/H2B/H3/H4
Capana00g000428	143		Down	0.02216	K	H2A_PETCR Histone H2A OS=Petroselinum crispum PE=2 SV=1	---	1	0.00181036	120.65	SPSK(1)ATK(1)SPK	2	-4.8969	10		0.972533	0.957627	0.649493		0.564479							1.31499	1.1058		1.33022	1.06706	1.09501	0.590708						nucleus		GO:0005622 intracellular; GO:0005623 cell; GO:0005634 nucleus; GO:0005694 chromosome; GO:0043226 organelle; GO:0043227 membrane-bounded organelle; GO:0043228 non-membrane-bounded organelle; GO:0043229 intracellular organelle; GO:0043231 intracellular membrane-bounded organelle; GO:0043232 intracellular non-membrane-bounded organelle; GO:0044424 intracellular part; GO:0044464 cell part;		K11251	H2A; histone H2A		PF00125	Core histone H2A/H2B/H3/H4
Capana00g002861	109	1.5487	Up	0.00179896	K	PPA26_ARATH Bifunctional purple acid phosphatase 26 OS=Arabidopsis thaliana GN=PAP26 PE=1 SV=1	PAP26	1	6.38076e-13	148.82	YK(1)SGYIHQCLVSGLQYDTK	3	-6.8363	37		1.0642	0.997881	1.51781	1.65657	1.61593	0.807382		0.792265		0.773663	0.676778	1.34673	1.34156	1.36635	0.678999	0.851685	0.731441			0.702479	0.457103	0.542799	0.495035	vacuolar membrane	GO:0006793 phosphorus metabolic process; GO:0006796 phosphate-containing compound metabolic process; GO:0008152 metabolic process; GO:0009987 cellular process; GO:0016311 dephosphorylation; GO:0042592 homeostatic process; GO:0044237 cellular metabolic process; GO:0048878 chemical homeostasis; GO:0050801 ion homeostasis; GO:0055062 phosphate ion homeostasis; GO:0055081 anion homeostasis; GO:005508…	GO:0005618 cell wall; GO:0005622 intracellular; GO:0005623 cell; GO:0005737 cytoplasm; GO:0005773 vacuole; GO:0005829 cytosol; GO:0009505 plant-type cell wall; GO:0030312 external encapsulating structure; GO:0043226 organelle; GO:0043227 membrane-bounded organelle; GO:0043229 intracellular organelle; GO:0043231 intracellular membrane-bounded organelle; GO:0044424 intracellular part; GO:0044444 cy…	GO:0003824 catalytic activity; GO:0003993 acid phosphatase activity; GO:0016787 hydrolase activity; GO:0016788 hydrolase activity, acting on ester bonds; GO:0016791 phosphatase activity; GO:0042578 phosphoric ester hydrolase activity;	K22390			PF00149; PF14008	Calcineurin-like phosphoesterase; Iron/zinc purple acid phosphatase-like protein C
Capana00g003131	204	1.59065	Up	0.0090591	K	HEBP2_HUMAN Heme-binding protein 2 OS=Homo sapiens GN=HEBP2 PE=1 SV=1	HEBP2	1	1.15171e-12	131.22	AAYNSPFEFK(1)NR	2	-13.332	24	0.9843	0.997693	0.892941	1.51254	1.29364	1.76684	1.10711	1.27478		1.05996	0.713998	1.3736	1.25076	1.12358	1.01092	1.05351	0.91745	1.10064	1.01996	0.733132	0.796296		0.431935	0.459592	extracellular
Capana00g003266	251	1.77738	Up	0.0008162	K	PME_ACTDE Pectinesterase OS=Actinidia deliciosa PE=1 SV=1	---	1	2.20469e-24	165.02	GITFENYAGPSK(1)HQAVALR	3	-1.9872	56	0.881764	0.742972	0.818648	1.4511	1.3473	1.54442	0.795818	1.07434	1.11206	0.932712	0.570984	1.06529	1.5667	1.13066	1.29645	1.04278	0.811579	0.976695		0.630919	0.598909	0.809045	0.789038	0.79294	nucleus	GO:0006950 response to stress; GO:0006952 defense response; GO:0009605 response to external stimulus; GO:0009607 response to biotic stimulus; GO:0009617 response to bacterium; GO:0042742 defense response to bacterium; GO:0043086 negative regulation of catalytic activity; GO:0043207 response to external biotic stimulus; GO:0044092 negative regulation of molecular function; GO:0050790 regulation of…	GO:0005623 cell; GO:0044464 cell part; GO:0071944 cell periphery;	GO:0003824 catalytic activity; GO:0004857 enzyme inhibitor activity; GO:0016787 hydrolase activity; GO:0016788 hydrolase activity, acting on ester bonds; GO:0030234 enzyme regulator activity; GO:0030599 pectinesterase activity; GO:0046910 pectinesterase inhibitor activity; GO:0052689 carboxylic ester hydrolase activity; GO:0098772 molecular function regulator;	K01051	E3.1.1.11; pectinesterase [EC:3.1.1.11]	cann00040 Pentose and glucuronate interconversions; cann01100 Metabolic pathways	PF04043	Plant invertase/pectin methylesterase inhibitor
Capana00g003536	53	1.53024	Up	0.0129243	K	14339_SOLLC 14-3-3 protein 9 OS=Solanum lycopersicum GN=TFT9 PE=2 SV=2	TFT9	1	1.88859e-12	150.44	NLLSVGYK(1)NVVGSR	2	3.4006	24	0.607048	0.833026	0.698944	1.16488	1.00538	1.10296	1.00289	1.26013	1.52533	1.16697	0.810811	0.954386	1.57572	0.865705	0.814465	1.16715	1.23241	1.28397	1.07073	0.704785	0.753213	0.738333	0.7	0.791594	cytoplasm				K06630	YWHAE; 14-3-3 protein epsilon		PF00244	14-3-3 protein
Capana00g003542	246	1.76655	Up	0.000143072	K	"ILV5_ARATH Ketol-acid reductoisomerase, chloroplastic OS=Arabidopsis thaliana GN=At3g58610 PE=2 SV=2"	At3g58610	1	6.41831e-53	160.07	NISVIAVCPK(1)GMGPSVR	2	-5.0471	30	0.954206	0.910834	0.869365	1.55382	1.56886	1.70779	0.63313	0.94186	0.949084	0.683511	0.493225	0.80163	1.36754	1.07276	0.728324	1.07692	0.915375	0.761261					0.390311		chloroplast	GO:0010035 response to inorganic substance; GO:0010038 response to metal ion; GO:0042221 response to chemical; GO:0046686 response to cadmium ion; GO:0050896 response to stimulus;	GO:0005576 extracellular region; GO:0005618 cell wall; GO:0005622 intracellular; GO:0005623 cell; GO:0005737 cytoplasm; GO:0005739 mitochondrion; GO:0009507 chloroplast; GO:0009526 plastid envelope; GO:0009532 plastid stroma; GO:0009536 plastid; GO:0009570 chloroplast stroma; GO:0009941 chloroplast envelope; GO:0030312 external encapsulating structure; GO:0031967 organelle envelope; GO:0031975 en…	GO:0000166 nucleotide binding; GO:0000287 magnesium ion binding; GO:0005488 binding; GO:0005507 copper ion binding; GO:0005515 protein binding; GO:0036094 small molecule binding; GO:0042802 identical protein binding; GO:0042803 protein homodimerization activity; GO:0043167 ion binding; GO:0043168 anion binding; GO:0043169 cation binding; GO:0046872 metal ion binding; GO:0046914 transition metal i…	K00053	ilvC; ketol-acid reductoisomerase [EC:1.1.1.86]	cann00290 Valine, leucine and isoleucine biosynthesis; cann00770 Pantothenate and CoA biosynthesis; cann01100 Metabolic pathways; cann01110 Biosynthesis of secondary metabolites; cann01210 2-Oxocarboxylic acid metabolism; cann01230 Biosynthesis of amino acids
Capana01g000243	207	1.8038	Up	0.0128393	K	AMPN_ECOLI Aminopeptidase N OS=Escherichia coli (strain K12) GN=pepN PE=1 SV=2	pepN	1	3.07919e-69	228.55	NTSLEGLYK(1)SSGNFCTQCEAEGFRK	3	4.5015	27	0.385149	0.441667	0.429897	0.643371	0.665285	0.958203	0.787115	2.70189	2.19315	1.73412	0.56746		1.65279	0.462998	0.374307	0.767025	0.851786	0.679396	1.44727	0.701689	0.682331				chloroplast	GO:0006508 proteolysis; GO:0006518 peptide metabolic process; GO:0006807 nitrogen compound metabolic process; GO:0008152 metabolic process; GO:0009056 catabolic process; GO:0009987 cellular process; GO:0019538 protein metabolic process; GO:0034641 cellular nitrogen compound metabolic process; GO:0043170 macromolecule metabolic process; GO:0043171 peptide catabolic process; GO:0043603 cellular ami…	GO:0005622 intracellular; GO:0005623 cell; GO:0005737 cytoplasm; GO:0005886 plasma membrane; GO:0016020 membrane; GO:0044424 intracellular part; GO:0044464 cell part; GO:0071944 cell periphery;	GO:0003824 catalytic activity; GO:0004177 aminopeptidase activity; GO:0005488 binding; GO:0005515 protein binding; GO:0008233 peptidase activity; GO:0008235 metalloexopeptidase activity; GO:0008237 metallopeptidase activity; GO:0008238 exopeptidase activity; GO:0008270 zinc ion binding; GO:0016787 hydrolase activity; GO:0033218 amide binding; GO:0042277 peptide binding; GO:0042802 identical prote…	K01256	pepN; aminopeptidase N [EC:3.4.11.2]	cann00480 Glutathione metabolism; cann01100 Metabolic pathways	PF01433; PF11940	Peptidase family M1; Domain of unknown function (DUF3458)
Capana01g000293	57	0.658146	Down	0.0027178	K	SELH_MACFA Selenoprotein H OS=Macaca fascicularis GN=SELH PE=2 SV=2	SELH	1	9.7156e-183	250.16	ANSEPVSADPEPEK(1)R	2	-6.0776	36	1.37194	1.23119	1.44405	0.959128	0.829938	0.874564	0.490272	0.544516	0.455774	0.939481	1.10048	0.924477	1.67125	1.46667	1.74131	0.652096	0.932859	0.845659	0.524573	0.473684	0.535789	1.33364	1.29612	1.2436	nucleus
Capana01g000509	439	1.8851	Up	0.00048375	K	STIP_SOYBN Heat shock protein STI OS=Glycine max GN=STI PE=2 SV=1	STI	1	1.33208e-42	154.09	AACYTK(1)LAALPEGLK	2	-3.1269	43	0.642292	0.546627	0.565776	1.06567	1.18466	1.05744	0.954904	1.15836	0.895311	1.10387	0.681618	0.639896	1.3673	1.03618		1.54665	1.48655	1.87188	1.31075	0.94707	0.900756	1.00839	0.340245	0.984317	cytoplasm	GO:0006950 response to stress; GO:0006986 response to unfolded protein; GO:0009266 response to temperature stimulus; GO:0009408 response to heat; GO:0009409 response to cold; GO:0009611 response to wounding; GO:0009628 response to abiotic stimulus; GO:0009987 cellular process; GO:0010033 response to organic substance; GO:0016043 cellular component organization; GO:0022607 cellular component assem…		GO:0005488 binding; GO:0005515 protein binding; GO:0031072 heat shock protein binding; GO:0051879 Hsp90 protein binding; GO:0070678 preprotein binding;	K09553	STIP1; stress-induced-phosphoprotein 1
Capana01g000643	66	0.469711	Down	0.0122807	K	"DCL_SOLLC Protein DCL, chloroplastic OS=Solanum lycopersicum GN=DCL PE=2 SV=1"	DCL	1	1.76598e-17	126.21	EEENEPENEDATK(1)K	2	-6.5118	22	1.66708	1.36244	1.96418		0.767621	0.796107	1.00143	0.839607	1.26394	0.731905	0.555864	0.77434	1.16921	1.46709	1.09199	1.03409		1.11676	1.3977	0.70827	1.2597	0.350932	0.804648	0.913844	nucleus	GO:0000003 reproduction; GO:0003006 developmental process involved in reproduction; GO:0006996 organelle organization; GO:0006997 nucleus organization; GO:0007000 nucleolus organization; GO:0007275 multicellular organism development; GO:0009790 embryo development; GO:0009791 post-embryonic development; GO:0009793 embryo development ending in seed dormancy; GO:0009987 cellular process; GO:0010154 …	GO:0005622 intracellular; GO:0005623 cell; GO:0005634 nucleus; GO:0043226 organelle; GO:0043227 membrane-bounded organelle; GO:0043229 intracellular organelle; GO:0043231 intracellular membrane-bounded organelle; GO:0044424 intracellular part; GO:0044464 cell part;
Capana01g001041	217	2.22624	Up	0.0022005	K	"CLPP4_ARATH ATP-dependent Clp protease proteolytic subunit 4, chloroplastic OS=Arabidopsis thaliana GN=CLPP4 PE=1 SV=1"	CLPP4	1	3.86954e-28	159.12	DNVTK(1)IFSNCTGR	2	-7.2192	21	0.390728	0.39916	0.436716	0.827922		0.992553		1.41188	1.4162	0.943772	0.567547	1.0328	1.3384	0.919959	1.03553	1.16284	0.960123	1.11883	1.52614	1.09618		0.997091	1.04257	1.06086	chloroplast	GO:0006996 organelle organization; GO:0009657 plastid organization; GO:0009658 chloroplast organization; GO:0009987 cellular process; GO:0016043 cellular component organization; GO:0040034 regulation of development, heterochronic; GO:0048506 regulation of timing of meristematic phase transition; GO:0048509 regulation of meristem development; GO:0048510 regulation of timing of transition from vege…	GO:0005622 intracellular; GO:0005623 cell; GO:0005737 cytoplasm; GO:0009368 endopeptidase Clp complex; GO:0009507 chloroplast; GO:0009526 plastid envelope; GO:0009532 plastid stroma; GO:0009534 chloroplast thylakoid; GO:0009535 chloroplast thylakoid membrane; GO:0009536 plastid; GO:0009570 chloroplast stroma; GO:0009579 thylakoid; GO:0009840 chloroplastic endopeptidase Clp complex; GO:0009941 chl…		K01358	clpP, CLPP; ATP-dependent Clp protease, protease subunit [EC:3.4.21.92]		PF00574	Clp protease
Capana01g001582	53	1.61386	Up	0.021296	K	IDND_VITVI L-idonate 5-dehydrogenase OS=Vitis vinifera GN=VIT_16s0100g00290 PE=1 SV=2	VIT_16s0100g00290	1	5.52686e-11	151.52	AVGICGSDVHYLK(1)TLR	2	-3.1412	19	0.608466	0.513769	0.766436	1.13979	0.995844	0.912415		0.521354	0.645902	0.528186			1.19593	1.63321	1.41935	1.12317	1.61959	1.53679	1.35945	0.788486	0.991105		0.585194		cytoplasm	GO:0008152 metabolic process; GO:0055114 oxidation-reduction process;	GO:0005622 intracellular; GO:0005623 cell; GO:0005737 cytoplasm; GO:0005829 cytosol; GO:0005911 cell-cell junction; GO:0009506 plasmodesma; GO:0030054 cell junction; GO:0044424 intracellular part; GO:0044444 cytoplasmic part; GO:0044464 cell part; GO:0055044 symplast;	GO:0003824 catalytic activity; GO:0003939 L-iditol 2-dehydrogenase activity; GO:0016491 oxidoreductase activity; GO:0016614 oxidoreductase activity, acting on CH-OH group of donors; GO:0016616 oxidoreductase activity, acting on the CH-OH group of donors, NAD or NADP as acceptor;	K00008	SORD, gutB; L-iditol 2-dehydrogenase [EC:1.1.1.14]	cann00040 Pentose and glucuronate interconversions; cann00051 Fructose and mannose metabolism; cann01100 Metabolic pathways	PF08240	Alcohol dehydrogenase GroES-like domain
Capana01g003049	355	1.62963	Up	0.0142609	K	"GLNA2_DAUCA Glutamine synthetase, chloroplastic OS=Daucus carota GN=GLN2 PE=2 SV=1"	GLN2	1	2.6694e-141	227.73	RLTGK(1)HETASIDQFSWGVANR	3	-2.3076	110	0.842169	0.748874	0.674091	1.38163	1.00701	1.30269	0.721063	1.32627	1.51011	0.791667		1.05292	1.57383	0.867745	0.985782	1.16976	1.12574	1.01918	1.04158	0.539303	0.664016	0.76286	0.972875	0.84721	chloroplast	GO:0006082 organic acid metabolic process; GO:0006520 cellular amino acid metabolic process; GO:0006536 glutamate metabolic process; GO:0006541 glutamine metabolic process; GO:0006807 nitrogen compound metabolic process; GO:0006950 response to stress; GO:0006970 response to osmotic stress; GO:0007568 aging; GO:0008152 metabolic process; GO:0009064 glutamine family amino acid metabolic process; GO…	GO:0005576 extracellular region; GO:0005622 intracellular; GO:0005623 cell; GO:0005737 cytoplasm; GO:0005739 mitochondrion; GO:0005829 cytosol; GO:0005840 ribosome; GO:0009507 chloroplast; GO:0009526 plastid envelope; GO:0009532 plastid stroma; GO:0009534 chloroplast thylakoid; GO:0009535 chloroplast thylakoid membrane; GO:0009536 plastid; GO:0009570 chloroplast stroma; GO:0009579 thylakoid; GO:0…	GO:0003824 catalytic activity; GO:0004356 glutamate-ammonia ligase activity; GO:0016211 ammonia ligase activity; GO:0016874 ligase activity; GO:0016879 ligase activity, forming carbon-nitrogen bonds; GO:0016880 acid-ammonia (or amide) ligase activity;	K01915	glnA, GLUL; glutamine synthetase [EC:6.3.1.2]	cann00220 Arginine biosynthesis; cann00250 Alanine, aspartate and glutamate metabolism; cann00630 Glyoxylate and dicarboxylate metabolism; cann00910 Nitrogen metabolism; cann01100 Metabolic pathways; cann01230 Biosynthesis of amino acids	PF03951; PF00120	Glutamine synthetase, beta-Grasp domain; Glutamine synthetase, catalytic domain
Capana01g003395	75	1.91931	Up	0.0084351	K	"CH10C_ARATH 20 kDa chaperonin, chloroplastic OS=Arabidopsis thaliana GN=CPN21 PE=1 SV=2"	CPN21	1	7.31069e-07	126.17	SAGGVLLPK(1)SAVTFER	2	-5.1322	20	0.743711	1.0789	1.06196	2.05327	1.64949	1.83363		1.01267	0.731305	1.28404	0.762572	1.08183			0.695313		0.925961	0.901037			0.479224	0.963952	0.860717		chloroplast	GO:0006457 protein folding; GO:0006458 'de novo' protein folding; GO:0006950 response to stress; GO:0006986 response to unfolded protein; GO:0009987 cellular process; GO:0010033 response to organic substance; GO:0035966 response to topologically incorrect protein; GO:0042221 response to chemical; GO:0050896 response to stimulus; GO:0051084 'de novo' posttranslational protein folding; GO:0051085 c…	GO:0005622 intracellular; GO:0005623 cell; GO:0005737 cytoplasm; GO:0005739 mitochondrion; GO:0005759 mitochondrial matrix; GO:0009507 chloroplast; GO:0009526 plastid envelope; GO:0009532 plastid stroma; GO:0009536 plastid; GO:0009570 chloroplast stroma; GO:0009941 chloroplast envelope; GO:0031967 organelle envelope; GO:0031974 membrane-enclosed lumen; GO:0031975 envelope; GO:0043226 organelle; G…	GO:0005488 binding; GO:0005515 protein binding; GO:0019904 protein domain specific binding; GO:0043167 ion binding; GO:0043169 cation binding; GO:0046872 metal ion binding; GO:0051082 unfolded protein binding; GO:0051087 chaperone binding;	K04078	groES, HSPE1; chaperonin GroES		PF00166	Chaperonin 10 Kd subunit
Capana02g000024	636	1.77061	Up	0.0160359	K	"CGEP_ARATH Probable glutamyl endopeptidase, chloroplastic OS=Arabidopsis thaliana GN=GEP PE=2 SV=2"	GEP	1	2.5946e-230	277.21	TENTQYNLLSWPEK(1)K	2	5.1066	37	0.593939	0.643993	0.753541	1.36775	0.914258	1.24412	1.18797	1.13022	1.04452	1.11101	0.600575	0.622749	1.91167	1.06197	1.22199	1.15894	1.13894	0.985236	0.882474	1.01151	0.904321	0.85208	0.803077	0.766154	chloroplast		GO:0005622 intracellular; GO:0005623 cell; GO:0005737 cytoplasm; GO:0009507 chloroplast; GO:0009532 plastid stroma; GO:0009536 plastid; GO:0009570 chloroplast stroma; GO:0043226 organelle; GO:0043227 membrane-bounded organelle; GO:0043229 intracellular organelle; GO:0043231 intracellular membrane-bounded organelle; GO:0044422 organelle part; GO:0044424 intracellular part; GO:0044434 chloroplast p…
Capana02g001384	58	0.561773	Down	0.033683	K	RLA0_SOYBN 60S acidic ribosomal protein P0 OS=Glycine max PE=2 SV=1	---	1	7.20504e-05	101.45	GDSVVLMGK(1)NTMMK	2	-8.5448	19	1.96319	1.63253		1.10181	1.12514	0.803015	0.901622	1.10676		1.0914	0.688776	1.2842	1.21649	0.872671	0.944223	0.800164		0.730882	1.04011			0.856886	1.26386	1.03217	cytoplasm	GO:0006950 response to stress; GO:0009628 response to abiotic stimulus; GO:0034059 response to anoxia; GO:0036293 response to decreased oxygen levels; GO:0050896 response to stimulus; GO:0070482 response to oxygen levels;	GO:0005622 intracellular; GO:0005623 cell; GO:0005737 cytoplasm; GO:0005829 cytosol; GO:0005840 ribosome; GO:0015934 large ribosomal subunit; GO:0022625 cytosolic large ribosomal subunit; GO:0022626 cytosolic ribosome; GO:0032991 macromolecular complex; GO:0043226 organelle; GO:0043228 non-membrane-bounded organelle; GO:0043229 intracellular organelle; GO:0043232 intracellular non-membrane-bounde…	GO:0003735 structural constituent of ribosome; GO:0005198 structural molecule activity; GO:0005488 binding; GO:0044877 macromolecular complex binding;	K02941	RP-LP0, RPLP0; large subunit ribosomal protein LP0	cann03010 Ribosome
Capana02g002193	347	1.8562	Up	0.0056039	K	"ATPG_TOBAC ATP synthase gamma chain, chloroplastic OS=Nicotiana tabacum GN=ATPC PE=1 SV=1"	ATPC	1	1.7275e-231	301.59	MSAMSSATDNASELK(1)K	2	0.55581	180	0.522556	0.54038	0.621744	1.11466	0.847539	1.1649	0.955573	1.07184	1.07378	0.909091	0.742574	0.880531	0.85744	0.873362	0.823077	1.31786	1.121	1.05769	1.18219	0.956149	0.911132	1.41841	1.53439	1.66156	chloroplast				K02115	ATPF1G, atpG; F-type H+-transporting ATPase subunit gamma	cann00190 Oxidative phosphorylation; cann00195 Photosynthesis; cann01100 Metabolic pathways	PF00231	ATP synthase
Capana02g002577	139	0.622903	Down	0.0130229	K	"FENR1_TOBAC Ferredoxin--NADP reductase, leaf-type isozyme, chloroplastic OS=Nicotiana tabacum GN=PETH PE=2 SV=1"	PETH	0.999871	4.13745e-34	191.98	EGQSIGVIADGVDANGKPHK(1)LR	3	-3.883	50	0.813602	0.630037	0.587879	0.384522	0.448674	0.432243	0.532353	0.606763	0.816148	1.42409	1.2955	1.42843	0.597884	1.13563	0.740314	0.54566	0.696937	0.751432	1.60281	1.15328	0.88685	1.60148	1.67416	1.71137	chloroplast	GO:0006091 generation of precursor metabolites and energy; GO:0006950 response to stress; GO:0006952 defense response; GO:0008152 metabolic process; GO:0009605 response to external stimulus; GO:0009607 response to biotic stimulus; GO:0009617 response to bacterium; GO:0009767 photosynthetic electron transport chain; GO:0009987 cellular process; GO:0015979 photosynthesis; GO:0019684 photosynthesis,…	GO:0005576 extracellular region; GO:0005622 intracellular; GO:0005623 cell; GO:0005737 cytoplasm; GO:0009507 chloroplast; GO:0009526 plastid envelope; GO:0009532 plastid stroma; GO:0009534 chloroplast thylakoid; GO:0009535 chloroplast thylakoid membrane; GO:0009536 plastid; GO:0009570 chloroplast stroma; GO:0009579 thylakoid; GO:0009941 chloroplast envelope; GO:0016020 membrane; GO:0031967 organe…	GO:0003676 nucleic acid binding; GO:0003723 RNA binding; GO:0003727 single-stranded RNA binding; GO:0003824 catalytic activity; GO:0005488 binding; GO:0005515 protein binding; GO:0008187 poly-pyrimidine tract binding; GO:0008266 poly(U) RNA binding; GO:0009055 electron carrier activity; GO:0016491 oxidoreductase activity; GO:0019904 protein domain specific binding; GO:0045156 electron transporter…	K02641	petH; ferredoxin--NADP+ reductase [EC:1.18.1.2]	cann00195 Photosynthesis; cann01100 Metabolic pathways	PF00175	Oxidoreductase NAD-binding domain
Capana02g003489	214	1.80604	Up	0.012204	K	"FDH_SOLTU Formate dehydrogenase, mitochondrial OS=Solanum tuberosum GN=FDH1 PE=1 SV=2"	FDH1	1	6.81522e-07	127.03	LK(1)PFNCNLLYHDR	2	-4.3057	57	0.765432	0.756272	0.781638	1.51079	1.21782	1.43132	0.892947	0.958432	1.10601	0.762877	0.690432	0.792593	1.34434	0.958035	0.962635	1.12214	0.886926	0.914855	0.966667	0.816307	0.817154	1.19619	1.25389	1.11868	mitochondria	GO:0010035 response to inorganic substance; GO:0010038 response to metal ion; GO:0042221 response to chemical; GO:0046686 response to cadmium ion; GO:0050896 response to stimulus;	GO:0005622 intracellular; GO:0005623 cell; GO:0005737 cytoplasm; GO:0005739 mitochondrion; GO:0009507 chloroplast; GO:0009536 plastid; GO:0009579 thylakoid; GO:0043226 organelle; GO:0043227 membrane-bounded organelle; GO:0043229 intracellular organelle; GO:0043231 intracellular membrane-bounded organelle; GO:0044424 intracellular part; GO:0044444 cytoplasmic part; GO:0044464 cell part;		K00122	FDH; formate dehydrogenase [EC:1.17.1.9]	cann00630 Glyoxylate and dicarboxylate metabolism; cann01100 Metabolic pathways; cann01200 Carbon metabolism	PF00389; PF02826	D-isomer specific 2-hydroxyacid dehydrogenase, catalytic domain; D-isomer specific 2-hydroxyacid dehydrogenase, NAD binding domain
Capana03g000208	47	1.87735	Up	0.043801	K	RL281_ARATH 60S ribosomal protein L28-1 OS=Arabidopsis thaliana GN=RPL28A PE=1 SV=1	RPL28A	1	8.30421e-10	185.57	EPNNLYNLHSYK(1)HSGLANK(1)K	3	4.3664	50	0.933868	0.669476	0.585206	1.24014	1.81929	1.04924	1.04082	1.00874	1.03778	1.34793	0.681871	0.781176	0.75	0.744888	0.722664	0.827387	0.870425	1.08004	1.53016	1.69515	1.44884	0.519305	0.822074	0.791745	cytoplasm	GO:0006412 translation; GO:0006518 peptide metabolic process; GO:0006807 nitrogen compound metabolic process; GO:0008152 metabolic process; GO:0009058 biosynthetic process; GO:0009059 macromolecule biosynthetic process; GO:0009719 response to endogenous stimulus; GO:0009725 response to hormone; GO:0009735 response to cytokinin; GO:0009987 cellular process; GO:0010033 response to organic substance…	GO:0005618 cell wall; GO:0005622 intracellular; GO:0005623 cell; GO:0005737 cytoplasm; GO:0005829 cytosol; GO:0005840 ribosome; GO:0005886 plasma membrane; GO:0005911 cell-cell junction; GO:0009506 plasmodesma; GO:0009507 chloroplast; GO:0009536 plastid; GO:0015934 large ribosomal subunit; GO:0016020 membrane; GO:0022625 cytosolic large ribosomal subunit; GO:0022626 cytosolic ribosome; GO:0030054…	GO:0003735 structural constituent of ribosome; GO:0005198 structural molecule activity;	K02903	RP-L28e, RPL28; large subunit ribosomal protein L28e	cann03010 Ribosome
Capana03g000743	473	0.54827	Down	0.0082006	K	H1_WHEAT Histone H1 OS=Triticum aestivum PE=2 SV=2	---	1	0.000549657	77.157	SYSSPAVSTTVK(1)K(1)AR	2	-8.0562	9	1.32298	1.19439		0.703448		0.676749				0.84522		0.957265		1.04415			0.818449	0.635838							nucleus		GO:0005622 intracellular; GO:0005623 cell; GO:0005634 nucleus; GO:0005694 chromosome; GO:0005730 nucleolus; GO:0005737 cytoplasm; GO:0005739 mitochondrion; GO:0031974 membrane-enclosed lumen; GO:0031981 nuclear lumen; GO:0043226 organelle; GO:0043227 membrane-bounded organelle; GO:0043228 non-membrane-bounded organelle; GO:0043229 intracellular organelle; GO:0043231 intracellular membrane-bounded…					PF00538	linker histone H1 and H5 family
Capana03g000791	286	1.59188	Up	0.0166388	K	"CHLP_TOBAC Geranylgeranyl diphosphate reductase, chloroplastic OS=Nicotiana tabacum GN=CHLP PE=2 SV=1"	CHLP	1	0.0122808	81.32	K(1)FQLATR	2	-5.334	13	0.78744	0.727646	0.805768	1.51571	1.08275	1.09607	0.739927	0.608993	0.676443	0.924171			1.08696					1.13271					1.03528		chloroplast	GO:0006629 lipid metabolic process; GO:0006644 phospholipid metabolic process; GO:0006720 isoprenoid metabolic process; GO:0006721 terpenoid metabolic process; GO:0006725 cellular aromatic compound metabolic process; GO:0006766 vitamin metabolic process; GO:0006775 fat-soluble vitamin metabolic process; GO:0006778 porphyrin-containing compound metabolic process; GO:0006779 porphyrin-containing co…	GO:0005622 intracellular; GO:0005623 cell; GO:0005737 cytoplasm; GO:0009507 chloroplast; GO:0009526 plastid envelope; GO:0009534 chloroplast thylakoid; GO:0009535 chloroplast thylakoid membrane; GO:0009536 plastid; GO:0009579 thylakoid; GO:0009941 chloroplast envelope; GO:0016020 membrane; GO:0031967 organelle envelope; GO:0031975 envelope; GO:0031976 plastid thylakoid; GO:0031984 organelle subco…	GO:0003824 catalytic activity; GO:0016491 oxidoreductase activity; GO:0045550 geranylgeranyl reductase activity;	K10960	chlP, bchP; geranylgeranyl diphosphate/geranylgeranyl-bacteriochlorophyllide a reductase [EC:1.3.1.83 1.3.1.111]	cann00860 Porphyrin and chlorophyll metabolism; cann00900 Terpenoid backbone biosynthesis; cann01100 Metabolic pathways; cann01110 Biosynthesis of secondary metabolites
Capana03g001078	178	1.64569	Up	0.015917	K	TS2_MAIZE Sex determination protein tasselseed-2 OS=Zea mays GN=TS2 PE=2 SV=1	TS2	1	1.78804e-05	85.821	HAVLGLVK(1)SASK	2	-7.4314	17	0.799368	0.740413	0.711621	1.49949	1.00383	1.20179	0.827947		0.875954	0.861259		0.852423		0.840889	0.836364	0.948352				0.760227		2.08772	1.2123	1.67857	cytoplasm							PF13561	Enoyl-(Acyl carrier protein) reductase
Capana03g001353	258	1.62627	Up	0.0111154	K	"MASY_GOSHI Malate synthase, glyoxysomal OS=Gossypium hirsutum PE=2 SV=1"	---	1	0.000318794	93.162	AEK(1)WAGIEEGSIR	2	-6.623	8		0.668023	0.697619	1.16241		1.05849			0.685336				0.9866	0.924167				0.771887							peroxisome	GO:0005975 carbohydrate metabolic process; GO:0006081 cellular aldehyde metabolic process; GO:0006082 organic acid metabolic process; GO:0006097 glyoxylate cycle; GO:0008152 metabolic process; GO:0009987 cellular process; GO:0019752 carboxylic acid metabolic process; GO:0032787 monocarboxylic acid metabolic process; GO:0043436 oxoacid metabolic process; GO:0044237 cellular metabolic process; GO:0…	GO:0005622 intracellular; GO:0005623 cell; GO:0005737 cytoplasm; GO:0005777 peroxisome; GO:0009514 glyoxysome; GO:0042579 microbody; GO:0043226 organelle; GO:0043227 membrane-bounded organelle; GO:0043229 intracellular organelle; GO:0043231 intracellular membrane-bounded organelle; GO:0044424 intracellular part; GO:0044444 cytoplasmic part; GO:0044464 cell part;	GO:0003824 catalytic activity; GO:0004474 malate synthase activity; GO:0016740 transferase activity; GO:0016746 transferase activity, transferring acyl groups; GO:0046912 transferase activity, transferring acyl groups, acyl groups converted into alkyl on transfer;	K01638	aceB, glcB; malate synthase [EC:2.3.3.9]	cann00620 Pyruvate metabolism; cann00630 Glyoxylate and dicarboxylate metabolism; cann01100 Metabolic pathways; cann01110 Biosynthesis of secondary metabolites; cann01200 Carbon metabolism
Capana03g002267	122	1.53898	Up	0.0032191	K	"UCRIA_SOLTU Cytochrome b6-f complex iron-sulfur subunit, chloroplastic OS=Solanum tuberosum GN=petC PE=2 SV=1"	petC	1	2.79289e-37	219.59	DALGNDVVASEWLK(1)THAPGSR	3	-7.425	24	0.521226	0.580411	0.595533	0.779083	0.906091	0.92674	0.759454	1.4249	1.29042	1.68919	0.719547	0.856239	1.80418	0.968822	0.870044	0.969731	0.905742	1.03478	0.918232	0.844995	0.875556	1.08648	1.06273	1.12903	chloroplast		GO:0005622 intracellular; GO:0005623 cell; GO:0005737 cytoplasm; GO:0009507 chloroplast; GO:0009534 chloroplast thylakoid; GO:0009535 chloroplast thylakoid membrane; GO:0009536 plastid; GO:0009579 thylakoid; GO:0016020 membrane; GO:0031976 plastid thylakoid; GO:0031984 organelle subcompartment; GO:0034357 photosynthetic membrane; GO:0042651 thylakoid membrane; GO:0043226 organelle; GO:0043227 mem…		K02636	petC; cytochrome b6-f complex iron-sulfur subunit [EC:1.10.9.1]	cann00195 Photosynthesis; cann01100 Metabolic pathways	PF08802; PF00355	Cytochrome B6-F complex Fe-S subunit ; Rieske [2Fe-2S] domain
Capana03g004084	237	1.58481	Up	0.048924	K	SAHH_TOBAC Adenosylhomocysteinase OS=Nicotiana tabacum GN=SAHH PE=2 SV=1	SAHH	1	1.64343e-05	166.61	SK(1)FDNLYGCR	2	19.353	24	0.856975	0.791967	0.576594	1.4311	0.974865	1.12108	0.926421		1.26588	1.01043	0.814851	1.03693	1.33168	0.928361	0.980843		0.982063	1.05101	0.990773	1.093	0.882831	0.842063	0.959765	0.959133	cytoplasm	GO:0000003 reproduction; GO:0000096 sulfur amino acid metabolic process; GO:0003006 developmental process involved in reproduction; GO:0006082 organic acid metabolic process; GO:0006139 nucleobase-containing compound metabolic process; GO:0006259 DNA metabolic process; GO:0006325 chromatin organization; GO:0006342 chromatin silencing; GO:0006346 methylation-dependent chromatin silencing; GO:00063…	GO:0005576 extracellular region; GO:0005622 intracellular; GO:0005623 cell; GO:0005737 cytoplasm; GO:0005773 vacuole; GO:0005774 vacuolar membrane; GO:0005829 cytosol; GO:0005886 plasma membrane; GO:0005911 cell-cell junction; GO:0009506 plasmodesma; GO:0016020 membrane; GO:0030054 cell junction; GO:0031090 organelle membrane; GO:0043226 organelle; GO:0043227 membrane-bounded organelle; GO:004322…	GO:0003824 catalytic activity; GO:0004013 adenosylhomocysteinase activity; GO:0005488 binding; GO:0005507 copper ion binding; GO:0016787 hydrolase activity; GO:0016801 hydrolase activity, acting on ether bonds; GO:0016802 trialkylsulfonium hydrolase activity; GO:0043167 ion binding; GO:0043169 cation binding; GO:0046872 metal ion binding; GO:0046914 transition metal ion binding;	K01251	E3.3.1.1, ahcY; adenosylhomocysteinase [EC:3.3.1.1]	cann00270 Cysteine and methionine metabolism; cann01100 Metabolic pathways	PF05221; PF00670	S-adenosyl-L-homocysteine hydrolase; S-adenosyl-L-homocysteine hydrolase, NAD binding domain
Capana03g004091	322	1.75554	Up	0.03894	K	HHT1_ARATH Omega-hydroxypalmitate O-feruloyl transferase OS=Arabidopsis thaliana GN=HHT1 PE=1 SV=1	HHT1	1	0.000454319	95.311	LIK(1)NEIIDER	2	-8.2858	19		0.605103	0.753477	1.23581	1.14923		1.24823	1.54649	1.07083	1.07829	1.22245		0.887387	1.07656	0.935507	1.05725	1.10441		0.978206	1.01264	0.861815		0.505814		cytoplasm	GO:0000038 very long-chain fatty acid metabolic process; GO:0006082 organic acid metabolic process; GO:0006629 lipid metabolic process; GO:0006631 fatty acid metabolic process; GO:0006633 fatty acid biosynthetic process; GO:0007275 multicellular organism development; GO:0008152 metabolic process; GO:0008610 lipid biosynthetic process; GO:0009058 biosynthetic process; GO:0009555 pollen development…	GO:0005622 intracellular; GO:0005623 cell; GO:0005737 cytoplasm; GO:0005829 cytosol; GO:0009507 chloroplast; GO:0009534 chloroplast thylakoid; GO:0009535 chloroplast thylakoid membrane; GO:0009536 plastid; GO:0009579 thylakoid; GO:0016020 membrane; GO:0031976 plastid thylakoid; GO:0031984 organelle subcompartment; GO:0034357 photosynthetic membrane; GO:0042651 thylakoid membrane; GO:0043226 organ…
Capana04g000036	500	0.331823	Down	0.011281	K	ARID5_ARATH AT-rich interactive domain-containing protein 5 OS=Arabidopsis thaliana GN=ARID5 PE=2 SV=1	ARID5	1	1.49869e-26	192.95	ANEVEHPSK(1)VAR	2	-7.9404	23	1.77134	2.95076	1.37965	0.641577	0.598165	0.784958	0.272401	0.349817		0.773196	0.809972	0.787142	1.02439	1.70573	1.88259	0.684461	0.779176	0.968011	0.540733	0.436179	0.407514	1.04786	1.17016	1.83009	nucleus	GO:0006082 organic acid metabolic process; GO:0006139 nucleobase-containing compound metabolic process; GO:0006351 transcription, DNA-templated; GO:0006355 regulation of transcription, DNA-templated; GO:0006357 regulation of transcription from RNA polymerase II promoter; GO:0006366 transcription from RNA polymerase II promoter; GO:0006725 cellular aromatic compound metabolic process; GO:0006790 s…	GO:0005622 intracellular; GO:0005623 cell; GO:0005634 nucleus; GO:0043226 organelle; GO:0043227 membrane-bounded organelle; GO:0043229 intracellular organelle; GO:0043231 intracellular membrane-bounded organelle; GO:0044424 intracellular part; GO:0044464 cell part;	GO:0000976 transcription regulatory region sequence-specific DNA binding; GO:0000977 RNA polymerase II regulatory region sequence-specific DNA binding; GO:0000981 RNA polymerase II transcription factor activity, sequence-specific DNA binding; GO:0001012 RNA polymerase II regulatory region DNA binding; GO:0001067 regulatory region nucleic acid binding; GO:0001228 transcriptional activator activity…				PF01388	ARID/BRIGHT DNA binding domain
Capana04g000847	267	1.68693	Up	0.0032017	K	NEP1_NEPGR Aspartic proteinase nepenthesin-1 OS=Nepenthes gracilis GN=nep1 PE=1 SV=1	nep1	1	2.48989e-07	102.46	LGPLGQPK(1)NIR	2	0.62966	30	0.769513	0.687318	0.848261	1.26395	1.18738	1.4372		1.07882	0.806897	1.18825	0.925532	1.43613	1.34081	1.39074	1.21494	0.806452	0.860558	0.976977	0.741655	0.745042	0.73503	0.996797	0.784952	0.695751	extracellular	GO:0002376 immune system process; GO:0006508 proteolysis; GO:0006807 nitrogen compound metabolic process; GO:0006950 response to stress; GO:0006952 defense response; GO:0006955 immune response; GO:0008152 metabolic process; GO:0009056 catabolic process; GO:0009057 macromolecule catabolic process; GO:0009605 response to external stimulus; GO:0009607 response to biotic stimulus; GO:0009627 systemic…	GO:0005576 extracellular region; GO:0005618 cell wall; GO:0005623 cell; GO:0009505 plant-type cell wall; GO:0030312 external encapsulating structure; GO:0044464 cell part; GO:0048046 apoplast; GO:0071944 cell periphery;	GO:0003824 catalytic activity; GO:0004175 endopeptidase activity; GO:0004190 aspartic-type endopeptidase activity; GO:0008233 peptidase activity; GO:0016787 hydrolase activity; GO:0070001 aspartic-type peptidase activity; GO:0070011 peptidase activity, acting on L-amino acid peptides;
Capana04g001114	44	1.98345	Up	0.0150243	K	BXL7_ARATH Probable beta-D-xylosidase 7 OS=Arabidopsis thaliana GN=BXL7 PE=2 SV=2	BXL7	1	2.42745e-55	163.09	SLK(1)FCQTQLPISVR	2	1.664	31	0.64485	0.932331	0.753205	1.55117		1.5303	0.881561			1.04736	0.605405	0.613636	1.72217	1.0037	0.764266	1.00889	1.40044	1.11111						0.500638	chloroplast							PF00933; PF01915	Glycosyl hydrolase family 3 N terminal domain; Glycosyl hydrolase family 3 C-terminal domain
Capana04g001619	17	1.51417	Up	0.041663	K	EIF3I_ARATH Eukaryotic translation initiation factor 3 subunit I OS=Arabidopsis thaliana GN=TIF3I1 PE=2 SV=2	TIF3I1	1	1.42124e-06	84.368	PLTFLK(1)YNR	2	5.3092	38	1.02222	1.21343			1.72737	1.65778	0.613504	0.870773		0.905998				1.28797	1.2282		1.0681	1.04134	0.834101			0.730769	0.521144	0.545196	mitochondria	GO:0006950 response to stress; GO:0006970 response to osmotic stress; GO:0009628 response to abiotic stimulus; GO:0009651 response to salt stress; GO:0010035 response to inorganic substance; GO:0010038 response to metal ion; GO:0042221 response to chemical; GO:0046686 response to cadmium ion; GO:0050896 response to stimulus;	GO:0000151 ubiquitin ligase complex; GO:0005622 intracellular; GO:0005623 cell; GO:0005737 cytoplasm; GO:0005829 cytosol; GO:0031461 cullin-RING ubiquitin ligase complex; GO:0032991 macromolecular complex; GO:0044424 intracellular part; GO:0044444 cytoplasmic part; GO:0044464 cell part; GO:0080008 Cul4-RING E3 ubiquitin ligase complex; GO:1902494 catalytic complex; GO:1990234 transferase complex;		K03246	EIF3I; translation initiation factor 3 subunit I	cann03013 RNA transport
Capana04g001731	383	1.6073	Up	9.6007e-05	K	"PHSL1_SOLTU Alpha-1,4 glucan phosphorylase L-1 isozyme, chloroplastic/amyloplastic OS=Solanum tuberosum PE=1 SV=2"	---	1	0.002511	117.3	IK(1)WEEFPEK	2	-8.7196	21	0.691562	0.630124	0.676301	1.07778	1.04853	1.08506	0.914829	1.19941	1.39436	1.00227	0.653524		1.34134	0.875399	0.830769	1.11872	0.900474	0.959449	1.04061	0.635303	0.589865	0.992167			chloroplast	GO:0000272 polysaccharide catabolic process; GO:0001101 response to acid chemical; GO:0005975 carbohydrate metabolic process; GO:0005976 polysaccharide metabolic process; GO:0005977 glycogen metabolic process; GO:0005980 glycogen catabolic process; GO:0006073 cellular glucan metabolic process; GO:0006091 generation of precursor metabolites and energy; GO:0006112 energy reserve metabolic process; …	GO:0005622 intracellular; GO:0005623 cell; GO:0005737 cytoplasm; GO:0009501 amyloplast; GO:0009507 chloroplast; GO:0009532 plastid stroma; GO:0009536 plastid; GO:0009570 chloroplast stroma; GO:0043226 organelle; GO:0043227 membrane-bounded organelle; GO:0043229 intracellular organelle; GO:0043231 intracellular membrane-bounded organelle; GO:0044422 organelle part; GO:0044424 intracellular part; G…	GO:0003824 catalytic activity; GO:0004645 phosphorylase activity; GO:0005488 binding; GO:0005515 protein binding; GO:0008144 drug binding; GO:0008184 glycogen phosphorylase activity; GO:0016740 transferase activity; GO:0016757 transferase activity, transferring glycosyl groups; GO:0016758 transferase activity, transferring hexosyl groups; GO:0019842 vitamin binding; GO:0030170 pyridoxal phosphate…	K00688	PYG, glgP; glycogen phosphorylase [EC:2.4.1.1]	cann00500 Starch and sucrose metabolism; cann01100 Metabolic pathways; cann01110 Biosynthesis of secondary metabolites
Capana04g002820	43	1.53864	Up	0.00119767	K	"CB2G_SOLLC Chlorophyll a-b binding protein 3C, chloroplastic OS=Solanum lycopersicum GN=CAB3C PE=3 SV=1"	CAB3C	1	1.05364e-54	205.26	AK(1)PVSSGSPWYGPDR	2	-7.4354	24	0.362832	0.395604	0.393562	0.63786	0.587185	0.547468	1.0249	1.23263	1.1697	1.10134	0.798137	1.35684	0.866532	0.661494	0.524378	1.24038	1.1761	1.14596	1.5641	1.33051	1.00843	1.45883	1.50752	1.56637	chloroplast				K08912	LHCB1; light-harvesting complex II chlorophyll a/b binding protein 1	cann00196 Photosynthesis - antenna proteins; cann01100 Metabolic pathways
Capana04g002867	254	1.5085	Up	0.0043022	K	"IN37_SPIOL 37 kDa inner envelope membrane protein, chloroplastic OS=Spinacia oleracea PE=1 SV=1"	---	1	0.0103872	72.355	IGPK(1)WYR	2	-4.8062	16	0.806483	0.763265		1.27195	1.12607	1.15392		0.838394				1.10349	1.09827	1.0852	0.887801			0.085509	0.86758	0.942488		1.27503	1.31584	1.16038	chloroplast	GO:0008152 metabolic process; GO:0032259 methylation;	GO:0005622 intracellular; GO:0005623 cell; GO:0005737 cytoplasm; GO:0044424 intracellular part; GO:0044464 cell part;	GO:0003824 catalytic activity; GO:0008168 methyltransferase activity; GO:0008757 S-adenosylmethionine-dependent methyltransferase activity; GO:0016740 transferase activity; GO:0016741 transferase activity, transferring one-carbon groups;	K12502	VTE3, APG1; MPBQ/MSBQ methyltransferase [EC:2.1.1.295]	cann00130 Ubiquinone and other terpenoid-quinone biosynthesis; cann01100 Metabolic pathways; cann01110 Biosynthesis of secondary metabolites	PF13649	Methyltransferase domain
Capana05g000123	152	0.562108	Down	0.0134373	K	"PXM16_ARATH Zinc-metallopeptidase, peroxisomal OS=Arabidopsis thaliana GN=PXM16 PE=2 SV=1"	PXM16	1	5.60364e-15	95.345	AVDSEHQK(1)NLLSDPWR	2	0.83074	14	0.985037	0.934609	1.22881	0.58756	0.592287		1.75784	1.25861	0.188604	0.909338				0.627615				0.791751	0.673152	0.755224					cytoplasm				K01408	IDE, ide; insulysin [EC:3.4.24.56]		PF05193	Peptidase M16 inactive domain
Capana05g002227	70	1.62763	Up	0.045897	K	"DLDH1_ARATH Dihydrolipoyl dehydrogenase 1, mitochondrial OS=Arabidopsis thaliana GN=LPD1 PE=1 SV=2"	LPD1	1	0.00195248	92.677	TTCIEK(1)R	2	-3.484	15	0.883786	0.82838	0.509841	1.3174	1.14833	1.15087	1.41393		1.01384		0.526316			0.755388	0.846486			0.946302	0.98567			1.30194	1.27476		mitochondria	GO:0008152 metabolic process; GO:0010035 response to inorganic substance; GO:0010038 response to metal ion; GO:0042221 response to chemical; GO:0046686 response to cadmium ion; GO:0050896 response to stimulus; GO:0055114 oxidation-reduction process;	GO:0005576 extracellular region; GO:0005622 intracellular; GO:0005623 cell; GO:0005737 cytoplasm; GO:0005739 mitochondrion; GO:0005740 mitochondrial envelope; GO:0005743 mitochondrial inner membrane; GO:0005746 mitochondrial respiratory chain; GO:0005747 mitochondrial respiratory chain complex I; GO:0005759 mitochondrial matrix; GO:0009507 chloroplast; GO:0009536 plastid; GO:0016020 membrane; GO:…	GO:0000166 nucleotide binding; GO:0003824 catalytic activity; GO:0004148 dihydrolipoyl dehydrogenase activity; GO:0005488 binding; GO:0005507 copper ion binding; GO:0005524 ATP binding; GO:0008144 drug binding; GO:0008270 zinc ion binding; GO:0016491 oxidoreductase activity; GO:0016651 oxidoreductase activity, acting on NAD(P)H; GO:0016667 oxidoreductase activity, acting on a sulfur group of dono…	K00382	DLD, lpd, pdhD; dihydrolipoamide dehydrogenase [EC:1.8.1.4]	cann00010 Glycolysis / Gluconeogenesis; cann00020 Citrate cycle (TCA cycle); cann00260 Glycine, serine and threonine metabolism; cann00280 Valine, leucine and isoleucine degradation; cann00310 Lysine degradation; cann00380 Tryptophan metabolism; cann00620 Pyruvate metabolism; cann00630 Glyoxylate and dicarboxylate metabolism; cann00640 Propanoate metabolism; cann01100 Metabolic pathways; cann0111…	PF07992; PF02852	Pyridine nucleotide-disulphide oxidoreductase; Pyridine nucleotide-disulphide oxidoreductase, dimerisation domain
Capana05g002511	130	1.73562	Up	0.022038	K	"RK2B_COFAR 50S ribosomal protein L2-B, chloroplastic OS=Coffea arabica GN=rpl2-B PE=3 SV=1"	rpl2-B	1	0.000455828	102.46	NK(1)YSDNLILR	2	-7.0431	27		0.386433	0.450326	0.60708	0.7924	0.778966		1.32157	1.09693	1.38677	0.940798	1.53571	1.34848	0.797772	0.879891	1.70436	1.47464	1.37753	1.49581	0.926066	0.897073	0.933333	0.818667	0.718499	cytoplasm	GO:0002181 cytoplasmic translation; GO:0006412 translation; GO:0006518 peptide metabolic process; GO:0006807 nitrogen compound metabolic process; GO:0008152 metabolic process; GO:0009058 biosynthetic process; GO:0009059 macromolecule biosynthetic process; GO:0009987 cellular process; GO:0010467 gene expression; GO:0019538 protein metabolic process; GO:0034641 cellular nitrogen compound metabolic …	GO:0005622 intracellular; GO:0005623 cell; GO:0005737 cytoplasm; GO:0005829 cytosol; GO:0005840 ribosome; GO:0009507 chloroplast; GO:0009526 plastid envelope; GO:0009532 plastid stroma; GO:0009536 plastid; GO:0009570 chloroplast stroma; GO:0009941 chloroplast envelope; GO:0015934 large ribosomal subunit; GO:0016020 membrane; GO:0022625 cytosolic large ribosomal subunit; GO:0022626 cytosolic ribos…	GO:0003676 nucleic acid binding; GO:0003723 RNA binding; GO:0003729 mRNA binding; GO:0003735 structural constituent of ribosome; GO:0005198 structural molecule activity; GO:0005488 binding; GO:0097159 organic cyclic compound binding; GO:1901363 heterocyclic compound binding;	K02886	RP-L2, MRPL2, rplB; large subunit ribosomal protein L2	cann03010 Ribosome	PF03947	Ribosomal Proteins L2, C-terminal domain
Capana06g000659	311	3.53471	Up	0.0100179	K	APMAP_BOVIN Adipocyte plasma membrane-associated protein OS=Bos taurus GN=APMAP PE=2 SV=1	APMAP	1	3.46512e-33	191.55	TTYSIINSK(1)YPQLR	2	2.2105	31	0.54429	0.502703	0.771335	2.77885	1.29179	2.35663		0.544662	0.934283			0.82959	1.14348	0.52436	0.448696	1.43615	1.60136	1.58611	0.582748	0.49632	0.446023	0.314607			cytoplasm		GO:0005622 intracellular; GO:0005623 cell; GO:0005737 cytoplasm; GO:0005773 vacuole; GO:0005774 vacuolar membrane; GO:0005783 endoplasmic reticulum; GO:0012505 endomembrane system; GO:0016020 membrane; GO:0031090 organelle membrane; GO:0043226 organelle; GO:0043227 membrane-bounded organelle; GO:0043229 intracellular organelle; GO:0043231 intracellular membrane-bounded organelle; GO:0044422 organ…	GO:0003824 catalytic activity; GO:0016787 hydrolase activity; GO:0016788 hydrolase activity, acting on ester bonds;	K21407	APMAP; adipocyte plasma membrane-associated protein
Capana06g000891	203	0.389733	Down	0.02958	K	"NDK2_TOBAC Nucleoside diphosphate kinase 2, chloroplastic OS=Nicotiana tabacum GN=NDPK2 PE=1 SV=1"	NDPK2	1	1.16606e-53	179.98	NVVHGSDSPDNGK(1)R	2	0.49848	38	1.65786		1.19834	0.567546		0.54561	0.539801	0.944695	1.20493				0.753731	1.21901	1.30049		1.32401	1.38315	0.854077	1.09227	0.573869	1.64031	1.08631	1.35241	chloroplast	GO:0000302 response to reactive oxygen species; GO:0006139 nucleobase-containing compound metabolic process; GO:0006165 nucleoside diphosphate phosphorylation; GO:0006725 cellular aromatic compound metabolic process; GO:0006753 nucleoside phosphate metabolic process; GO:0006793 phosphorus metabolic process; GO:0006796 phosphate-containing compound metabolic process; GO:0006807 nitrogen compound m…	GO:0005622 intracellular; GO:0005623 cell; GO:0005634 nucleus; GO:0005737 cytoplasm; GO:0009507 chloroplast; GO:0009526 plastid envelope; GO:0009532 plastid stroma; GO:0009536 plastid; GO:0009570 chloroplast stroma; GO:0009579 thylakoid; GO:0009941 chloroplast envelope; GO:0031967 organelle envelope; GO:0031975 envelope; GO:0043226 organelle; GO:0043227 membrane-bounded organelle; GO:0043229 intr…	GO:0003824 catalytic activity; GO:0004550 nucleoside diphosphate kinase activity; GO:0016301 kinase activity; GO:0016740 transferase activity; GO:0016772 transferase activity, transferring phosphorus-containing groups; GO:0016776 phosphotransferase activity, phosphate group as acceptor; GO:0019205 nucleobase-containing compound kinase activity;	K00940	ndk, NME; nucleoside-diphosphate kinase [EC:2.7.4.6]	cann00230 Purine metabolism; cann00240 Pyrimidine metabolism; cann01100 Metabolic pathways; cann01110 Biosynthesis of secondary metabolites; cann04016 MAPK signaling pathway - plant	PF00334	Nucleoside diphosphate kinase
Capana06g000944	78	0.633189	Down	0.044884	K	RL44_GOSHI 60S ribosomal protein L44 OS=Gossypium hirsutum GN=RPL44 PE=3 SV=3	RPL44	1	6.26907e-32	170.22	LQCQGCK(1)HVSQHPIK	3	0.59456	32	1.12339	1.01827	1.61349	0.84934	0.829225	0.699155	0.90261		0.797269			0.898204								1.21277	1.18851				nucleus				K02929	RP-L44e, RPL44; large subunit ribosomal protein L44e	cann03010 Ribosome
Capana06g001915	163	2.88574	Up	0.0119587	K	"PSAD_SOLLC Photosystem I reaction center subunit II, chloroplastic OS=Solanum lycopersicum GN=psaD PE=2 SV=1"	psaD	1	3.98252e-11	137.89	VFPNGEVQYLHPK(1)DGVYPEK	2	1.3612	59	0.424779		0.371005	1.47541	0.913551	1.05568	0.524229	1.46915	1.49621	1.11959		1.35058	1.54171	0.660224	0.755319	1.24657	1.01183	0.894318	1.29437	0.806723	0.731061	0.900484	1.01433		chloroplast		GO:0005622 intracellular; GO:0005623 cell; GO:0005737 cytoplasm; GO:0009507 chloroplast; GO:0009526 plastid envelope; GO:0009532 plastid stroma; GO:0009534 chloroplast thylakoid; GO:0009535 chloroplast thylakoid membrane; GO:0009536 plastid; GO:0009570 chloroplast stroma; GO:0009579 thylakoid; GO:0009941 chloroplast envelope; GO:0010287 plastoglobule; GO:0016020 membrane; GO:0031967 organelle env…	GO:0005488 binding; GO:0005515 protein binding; GO:0019904 protein domain specific binding;	K02692	psaD; photosystem I subunit II	cann00195 Photosynthesis; cann01100 Metabolic pathways
Capana06g002561	30	2.33929	Up	0.0161029	K	"APX1_ARATH L-ascorbate peroxidase 1, cytosolic OS=Arabidopsis thaliana GN=APX1 PE=1 SV=2"	APX1	1	4.48782e-47	164.31	GLIAEK(1)NCAPLMLR	2	-7.0122	22	0.50297	0.570393		1.1441		1.36681		1.034	0.549339		0.743268			0.904153	1.07322			1.20879		1.27264	1.42508	0.990637	1.0905	1.16949	mitochondria	GO:0000003 reproduction; GO:0000302 response to reactive oxygen species; GO:0003006 developmental process involved in reproduction; GO:0006950 response to stress; GO:0006970 response to osmotic stress; GO:0006979 response to oxidative stress; GO:0007275 multicellular organism development; GO:0008152 metabolic process; GO:0009056 catabolic process; GO:0009266 response to temperature stimulus; GO:0…	GO:0005618 cell wall; GO:0005622 intracellular; GO:0005623 cell; GO:0005737 cytoplasm; GO:0005794 Golgi apparatus; GO:0005829 cytosol; GO:0005886 plasma membrane; GO:0005911 cell-cell junction; GO:0009506 plasmodesma; GO:0009507 chloroplast; GO:0009532 plastid stroma; GO:0009536 plastid; GO:0009570 chloroplast stroma; GO:0012505 endomembrane system; GO:0016020 membrane; GO:0030054 cell junction; …	GO:0003824 catalytic activity; GO:0004130 cytochrome-c peroxidase activity; GO:0004601 peroxidase activity; GO:0016209 antioxidant activity; GO:0016491 oxidoreductase activity; GO:0016684 oxidoreductase activity, acting on peroxide as acceptor; GO:0016688 L-ascorbate peroxidase activity;	K00434	E1.11.1.11; L-ascorbate peroxidase [EC:1.11.1.11]	cann00053 Ascorbate and aldarate metabolism; cann00480 Glutathione metabolism; cann01100 Metabolic pathways	PF00141	Peroxidase
Capana07g000032	800	1.51809	Up	0.0130207	K	XYLA_ARATH Xylose isomerase OS=Arabidopsis thaliana GN=XYLA PE=2 SV=2	XYLA	1	0.00644061	76.605	K(1)YGLIGDFK	2	-8.5243	14	0.731092	0.614714		1.00998	0.965278	1.08932		0.966068	1.13434		0.763324	0.761116	1.84299	1.14225		1.04131				0.918172			1.0442		mitochondria		GO:0005622 intracellular; GO:0005623 cell; GO:0005737 cytoplasm; GO:0005773 vacuole; GO:0005774 vacuolar membrane; GO:0005783 endoplasmic reticulum; GO:0005794 Golgi apparatus; GO:0012505 endomembrane system; GO:0016020 membrane; GO:0031090 organelle membrane; GO:0043226 organelle; GO:0043227 membrane-bounded organelle; GO:0043229 intracellular organelle; GO:0043231 intracellular membrane-bounded…		K01805	xylA; xylose isomerase [EC:5.3.1.5]	cann00040 Pentose and glucuronate interconversions; cann00051 Fructose and mannose metabolism; cann01100 Metabolic pathways	PF09118	Domain of unknown function (DUF1929)
Capana07g000048	38	0.596801	Down	0.0046779	K	PSAA_TOBAC Photosystem I P700 chlorophyll a apoprotein A1 OS=Nicotiana tabacum GN=psaA PE=3 SV=2	psaA	1	4.79344e-89	101.98	TIAK(1)GPDTTTWIWNLHADAHDFDSHTSDLEEISR	4	5.6241	13	1.65461	1.39286	1.35689	0.912487	0.94964	0.766402	1.48558	1.65457		1.13155	0.971084		0.917745									0.386364		0.313501	plasma membrane	GO:0008152 metabolic process; GO:0009987 cellular process; GO:0015979 photosynthesis; GO:0044237 cellular metabolic process;	GO:0005622 intracellular; GO:0005623 cell; GO:0005737 cytoplasm; GO:0009507 chloroplast; GO:0009526 plastid envelope; GO:0009532 plastid stroma; GO:0009534 chloroplast thylakoid; GO:0009535 chloroplast thylakoid membrane; GO:0009536 plastid; GO:0009570 chloroplast stroma; GO:0009579 thylakoid; GO:0009941 chloroplast envelope; GO:0010287 plastoglobule; GO:0016020 membrane; GO:0031967 organelle env…		K02689	psaA; photosystem I P700 chlorophyll a apoprotein A1	cann00195 Photosynthesis; cann01100 Metabolic pathways
Capana07g001429	157	1.56123	Up	0.0057154	K	"ACOC_CUCMA Aconitate hydratase, cytoplasmic OS=Cucurbita maxima PE=2 SV=1"	---	1	0.00294491	108.3	NCDNFQVK(1)K	2	4.4161	19	0.87415	1.14302	1.09081	1.61834	1.65422	1.57973				0.617807	0.644796		1.40183	1.2763	1.16667	0.949105	0.818433			0.71135		0.40744	0.529412	0.636445	chloroplast	GO:0001101 response to acid chemical; GO:0006082 organic acid metabolic process; GO:0006101 citrate metabolic process; GO:0006102 isocitrate metabolic process; GO:0006950 response to stress; GO:0006970 response to osmotic stress; GO:0006979 response to oxidative stress; GO:0007275 multicellular organism development; GO:0008152 metabolic process; GO:0009605 response to external stimulus; GO:000962…	GO:0005618 cell wall; GO:0005622 intracellular; GO:0005623 cell; GO:0005737 cytoplasm; GO:0005739 mitochondrion; GO:0005773 vacuole; GO:0005774 vacuolar membrane; GO:0005829 cytosol; GO:0009507 chloroplast; GO:0009532 plastid stroma; GO:0009536 plastid; GO:0009570 chloroplast stroma; GO:0016020 membrane; GO:0030312 external encapsulating structure; GO:0031090 organelle membrane; GO:0043226 organe…	GO:0000166 nucleotide binding; GO:0003824 catalytic activity; GO:0003994 aconitate hydratase activity; GO:0005488 binding; GO:0005507 copper ion binding; GO:0005524 ATP binding; GO:0008144 drug binding; GO:0016829 lyase activity; GO:0016835 carbon-oxygen lyase activity; GO:0016836 hydro-lyase activity; GO:0017076 purine nucleotide binding; GO:0030554 adenyl nucleotide binding; GO:0032553 ribonucl…	K01681	ACO, acnA; aconitate hydratase [EC:4.2.1.3]	cann00020 Citrate cycle (TCA cycle); cann00630 Glyoxylate and dicarboxylate metabolism; cann01100 Metabolic pathways; cann01110 Biosynthesis of secondary metabolites; cann01200 Carbon metabolism; cann01210 2-Oxocarboxylic acid metabolism; cann01230 Biosynthesis of amino acids	PF00694	Aconitase C-terminal domain
Capana07g002194	147	1.55427	Up	0.0108974	K	"TRXM4_ARATH Thioredoxin M4, chloroplastic OS=Arabidopsis thaliana GN=At3g15360 PE=1 SV=2"	At3g15360	1	3.89943e-21	123.42	SIPTVMIFK(1)NGEK	2	-5.6202	50	0.503802	0.68299	0.572067	0.840173	0.90859	0.984979	1.60303	1.21173	1.25464	2.90476	0.481659	2.32897	1.72196	1.21969	0.497273	2.59511	0.254902	1.54987	0.492632			0.473418	0.264403	0.504698	chloroplast				K03671	trxA; thioredoxin 1		PF00085	Thioredoxin
Capana07g002342	187	1.51052	Up	0.0065006	K	Putative lysine decarbxylase	---	1	0.000259783	94.804	K(1)HGLVDAVVR	2	-6.9219	16	0.891892		0.940843	1.41201		1.35638	0.790368			0.955711	0.928493	1.03294	1.4588	1.37338			0.882805	0.898121	0.682701	1.01248	0.907216	0.892473			cytoplasm
Capana08g000545	571	1.70838	Up	0.0025154	K	EF2_BETVU Elongation factor 2 OS=Beta vulgaris PE=2 SV=1	---	1	0.000135312	154.71	ETVLEK(1)SCR	2	-5.8114	23	0.824468	0.930519	0.947186	1.356	1.56072	1.69963	1.1626	1.14778	1.20393	1.01541	0.701463	1.04251	1.33368	0.97732	0.970833	1.10111	0.396462		0.789658	0.593054	0.741573	0.47992	0.756098	0.589041	cytoplasm				K03234	EEF2; elongation factor 2		PF00009; PF03144; PF03764; PF00679	Elongation factor Tu GTP binding domain; Elongation factor Tu domain 2; Elongation factor G, domain IV; Elongation factor G C-terminus
Capana08g000545	291	2.19206	Up	0.021643	K	EF2_BETVU Elongation factor 2 OS=Beta vulgaris PE=2 SV=1	---	1	5.39095e-55	228.13	QIINTCMNDQK(1)DK	2	-5.3997	41	0.513298		0.780952	1.2474	1.59962	1.40858	0.85935		0.988534		0.88878	1.04058	1.0272	0.824742	0.882292	1.35778	1.18834	1.10625	1.00526	1.16029	0.839239	1.0502	0.644309	0.847358	cytoplasm				K03234	EEF2; elongation factor 2		PF00009; PF03144; PF03764; PF00679	Elongation factor Tu GTP binding domain; Elongation factor Tu domain 2; Elongation factor G, domain IV; Elongation factor G C-terminus
Capana08g000545	722	1.52079	Up	0.00114322	K	EF2_BETVU Elongation factor 2 OS=Beta vulgaris PE=2 SV=1	---	1	2.29759e-16	163.43	VIYASQLTAK(1)PR	2	2.1268	42	0.672872	0.725594	0.767965	1.09537	1.037	1.16231	0.78374	0.945813	0.827191	0.819846	0.810732	0.867633	1.11297	1.27216	1.23021	1.12556	1.08845	1.13646	0.940403	0.959038	0.85134	1.62851	1.79675	1.69472	cytoplasm				K03234	EEF2; elongation factor 2		PF00009; PF03144; PF03764; PF00679	Elongation factor Tu GTP binding domain; Elongation factor Tu domain 2; Elongation factor G, domain IV; Elongation factor G C-terminus
Capana08g001094	269	2.19419	Up	0.04568	K	K0664_DICDI Protein KIAA0664 homolog OS=Dictyostelium discoideum GN=cluA PE=1 SV=2	cluA	1	4.14381e-07	118.06	NK(1)FGNLPYGFR	2	-2.4186	15	0.334234		0.378336	0.556136	0.773272	1.01586		1.18173	0.889493	1.12238			1.52838			1.20366	1.40107	1.29604	0.676863		0.464				nucleus				K03255	TIF31, CLU1; protein TIF31
Capana08g001512	218	2.23875	Up	0.020164	K	XTH_TOBAC Probable xyloglucan endotransglucosylase/hydrolase protein OS=Nicotiana tabacum GN=XTH PE=2 SV=1	XTH	1	3.72949e-26	175.64	QK(1)YTVYNYCTDK(1)AR	2	7.2748	43	0.465313	0.669543	0.752932	1.15317	1.19292	1.8802	1.26724	1.47328	1.32302	1.08749	0.895756	1.35589	1.47336	1.11546	1.0599	1.2181	0.847795	1.11576	1.06997	0.839378		0.412096	0.452302	0.448585	extracellular				K08235	E2.4.1.207; xyloglucan:xyloglucosyl transferase [EC:2.4.1.207]		PF00722	Glycosyl hydrolases family 16
Capana08g001525	248	2.57282	Up	0.0040379	K	"CLPR3_ARATH ATP-dependent Clp protease proteolytic subunit-related protein 3, chloroplastic OS=Arabidopsis thaliana GN=CLPR3 PE=1 SV=1"	CLPR3	1	1.82108e-53	251.02	LLAK(1)HTENSEETVANAMR	2	-2.2792	31	0.477509	0.496124	0.566492	1.15155	1.49009			1.41884	1.2076	1.17324		1.03625	1.24259	0.815451	1.29574	0.637331	0.571865	0.82487			1.25437	1.48061			chloroplast							PF00574	Clp protease
Capana08g002681	201	1.65375	Up	0.027204	K	"TPIC_SPIOL Triosephosphate isomerase, chloroplastic OS=Spinacia oleracea GN=TPIP1 PE=1 SV=1"	TPIP1	1	9.00042e-64	186.27	EAGK(1)TFDVCFQQLK	2	-4.2611	23	0.557625	0.520095	0.691854	0.979978	0.978311	0.968146	0.568862	0.96054		1.25405	0.632969	0.871233	1.93846	1.04362	1.0106	1.50517	1.24563	1.26509	0.803383	0.772138	0.941896	1.04003	1.25252	1.11024	chloroplast	GO:0000003 reproduction; GO:0005975 carbohydrate metabolic process; GO:0005996 monosaccharide metabolic process; GO:0006006 glucose metabolic process; GO:0006066 alcohol metabolic process; GO:0006071 glycerol metabolic process; GO:0006081 cellular aldehyde metabolic process; GO:0006082 organic acid metabolic process; GO:0006090 pyruvate metabolic process; GO:0006091 generation of precursor metabo…	GO:0005576 extracellular region; GO:0005622 intracellular; GO:0005623 cell; GO:0005737 cytoplasm; GO:0005739 mitochondrion; GO:0005829 cytosol; GO:0009507 chloroplast; GO:0009526 plastid envelope; GO:0009532 plastid stroma; GO:0009536 plastid; GO:0009570 chloroplast stroma; GO:0009579 thylakoid; GO:0009941 chloroplast envelope; GO:0031967 organelle envelope; GO:0031975 envelope; GO:0043226 organe…	GO:0003824 catalytic activity; GO:0004807 triose-phosphate isomerase activity; GO:0016853 isomerase activity; GO:0016860 intramolecular oxidoreductase activity; GO:0016861 intramolecular oxidoreductase activity, interconverting aldoses and ketoses;	K01803	TPI, tpiA; triosephosphate isomerase (TIM) [EC:5.3.1.1]	cann00010 Glycolysis / Gluconeogenesis; cann00051 Fructose and mannose metabolism; cann00562 Inositol phosphate metabolism; cann00710 Carbon fixation in photosynthetic organisms; cann01100 Metabolic pathways; cann01110 Biosynthesis of secondary metabolites; cann01200 Carbon metabolism; cann01230 Biosynthesis of amino acids	PF00121	Triosephosphate isomerase
Capana08g002743	22	2.46278	Up	0.00199814	K	DHGY_CUCSA Glycerate dehydrogenase OS=Cucumis sativus GN=HPR-A PE=2 SV=1	HPR-A	1	1.17501e-08	159.93	VVSTK(1)SMPGTR	2	-6.7936	23	0.349899	0.496815	0.449389	1.21468	0.956132	1.0212	1.26242	1.2048	1.31612	1.21718	0.674272	1.22232	1.1875	0.764995		1.34893	1.14495	0.75162	1.1936		1.13324	0.874109		1.29138	cytoplasm	GO:0001101 response to acid chemical; GO:0006950 response to stress; GO:0007154 cell communication; GO:0008152 metabolic process; GO:0009314 response to radiation; GO:0009414 response to water deprivation; GO:0009415 response to water; GO:0009416 response to light stimulus; GO:0009605 response to external stimulus; GO:0009628 response to abiotic stimulus; GO:0009853 photorespiration; GO:0009854 o…	GO:0005576 extracellular region; GO:0005622 intracellular; GO:0005623 cell; GO:0005737 cytoplasm; GO:0005777 peroxisome; GO:0005829 cytosol; GO:0009507 chloroplast; GO:0009536 plastid; GO:0042579 microbody; GO:0043226 organelle; GO:0043227 membrane-bounded organelle; GO:0043229 intracellular organelle; GO:0043231 intracellular membrane-bounded organelle; GO:0044424 intracellular part; GO:0044444 …	GO:0003676 nucleic acid binding; GO:0003723 RNA binding; GO:0003727 single-stranded RNA binding; GO:0003824 catalytic activity; GO:0005488 binding; GO:0008187 poly-pyrimidine tract binding; GO:0008266 poly(U) RNA binding; GO:0008465 glycerate dehydrogenase activity; GO:0016491 oxidoreductase activity; GO:0016614 oxidoreductase activity, acting on CH-OH group of donors; GO:0016616 oxidoreductase a…	K15893	HPR1; hydroxypyruvate reductase 1	cann00260 Glycine, serine and threonine metabolism; cann00630 Glyoxylate and dicarboxylate metabolism; cann01100 Metabolic pathways; cann01110 Biosynthesis of secondary metabolites; cann01200 Carbon metabolism	PF00389	D-isomer specific 2-hydroxyacid dehydrogenase, catalytic domain
Capana09g000217	328	1.54847	Up	0.021723	K	ANM11_ARATH Protein arginine N-methyltransferase 1.1 OS=Arabidopsis thaliana GN=PRMT11 PE=1 SV=1	PRMT11	1	1.07006e-06	111.61	LLGFSTGPK(1)SR	2	-9.8083	30	0.739066	0.769891	0.707355	1.3749	0.927116	1.12988	0.903167	1.8835	1.22222	1.15938	0.668332	1.01141	1.96936	0.765727	0.812629	0.965993	1.29353		1.0387	0.674058		1.60042	1.21101		endoplasmic reticulum	GO:0006325 chromatin organization; GO:0006355 regulation of transcription, DNA-templated; GO:0006464 cellular protein modification process; GO:0006479 protein methylation; GO:0006807 nitrogen compound metabolic process; GO:0006996 organelle organization; GO:0008152 metabolic process; GO:0008213 protein alkylation; GO:0009889 regulation of biosynthetic process; GO:0009987 cellular process; GO:0010…	GO:0005622 intracellular; GO:0005623 cell; GO:0005634 nucleus; GO:0005737 cytoplasm; GO:0005829 cytosol; GO:0043226 organelle; GO:0043227 membrane-bounded organelle; GO:0043229 intracellular organelle; GO:0043231 intracellular membrane-bounded organelle; GO:0044424 intracellular part; GO:0044444 cytoplasmic part; GO:0044464 cell part;	GO:0003824 catalytic activity; GO:0008168 methyltransferase activity; GO:0008170 N-methyltransferase activity; GO:0008276 protein methyltransferase activity; GO:0008469 histone-arginine N-methyltransferase activity; GO:0008757 S-adenosylmethionine-dependent methyltransferase activity; GO:0016273 arginine N-methyltransferase activity; GO:0016274 protein-arginine N-methyltransferase activity; GO:00…	K11434	PRMT1; type I protein arginine methyltransferase [EC:2.1.1.319]
Capana09g000691	218	0.466742	Down	0.0027408	K	P1_ARATH NADP-dependent alkenal double bond reductase P1 OS=Arabidopsis thaliana GN=P1 PE=1 SV=1	P1	1	2.19897e-06	112.8	EEHDLNAALK(1)R	2	0.367	20	1.61758	1.73355	1.78242	0.87855		0.718814	0.895735	0.654817	0.724374	0.734848		0.968341	0.974359	1.01827	0.978343	0.694747	0.560852			0.925056		0.951825	1.0102	0.945415	cytoplasm	GO:0006950 response to stress; GO:0006979 response to oxidative stress; GO:0050896 response to stimulus;	GO:0005622 intracellular; GO:0005623 cell; GO:0005737 cytoplasm; GO:0005829 cytosol; GO:0005886 plasma membrane; GO:0016020 membrane; GO:0044424 intracellular part; GO:0044444 cytoplasmic part; GO:0044464 cell part; GO:0071944 cell periphery;
Capana09g001643	256	1.6987	Up	0.0441	K	"F16P1_ARATH Fructose-1,6-bisphosphatase, chloroplastic OS=Arabidopsis thaliana GN=FBP PE=1 SV=2"	FBP	1	7.71841e-16	168.78	YIDDLKDPGPSGK(1)PYSAR	3	-7.0789	36	0.514944	0.589427	0.703941	0.928239	1.34039	0.803157	1.23314	1.31609	1.14388		0.823477	1.09422	0.994357	0.791383	1.10294		0.811681	0.725806	1.03049	1.12919	1.19468	1.12254	1.39522	1.27995	nucleus	GO:0005975 carbohydrate metabolic process; GO:0005984 disaccharide metabolic process; GO:0005985 sucrose metabolic process; GO:0005986 sucrose biosynthetic process; GO:0005996 monosaccharide metabolic process; GO:0006000 fructose metabolic process; GO:0006002 fructose 6-phosphate metabolic process; GO:0006006 glucose metabolic process; GO:0006094 gluconeogenesis; GO:0006793 phosphorus metabolic p…	GO:0005622 intracellular; GO:0005623 cell; GO:0005737 cytoplasm; GO:0005829 cytosol; GO:0009507 chloroplast; GO:0009532 plastid stroma; GO:0009536 plastid; GO:0009570 chloroplast stroma; GO:0043226 organelle; GO:0043227 membrane-bounded organelle; GO:0043229 intracellular organelle; GO:0043231 intracellular membrane-bounded organelle; GO:0044422 organelle part; GO:0044424 intracellular part; GO:0…	GO:0003824 catalytic activity; GO:0016787 hydrolase activity; GO:0016788 hydrolase activity, acting on ester bonds; GO:0016791 phosphatase activity; GO:0019203 carbohydrate phosphatase activity; GO:0042132 fructose 1,6-bisphosphate 1-phosphatase activity; GO:0042578 phosphoric ester hydrolase activity; GO:0050308 sugar-phosphatase activity;	K03841	FBP, fbp; fructose-1,6-bisphosphatase I [EC:3.1.3.11]	cann00010 Glycolysis / Gluconeogenesis; cann00030 Pentose phosphate pathway; cann00051 Fructose and mannose metabolism; cann00710 Carbon fixation in photosynthetic organisms; cann01100 Metabolic pathways; cann01110 Biosynthesis of secondary metabolites; cann01200 Carbon metabolism	PF00316	Fructose-1-6-bisphosphatase
Capana09g001785	409	0.280599	Down	0.0083574	K	"RCA1_TOBAC Ribulose bisphosphate carboxylase/oxygenase activase 1, chloroplastic OS=Nicotiana tabacum PE=1 SV=1"	---	1	0.0124941	73.637	EQENVK(1)R	2	-2.7562	20	2.01918	1.22901	1.32475		0.437243	0.418199	1.0652	0.774976	0.515385		0.695695	0.697987		1.05139	1.52746	1.60949	0.843318	1.12487	0.057235		0.543316	1.49051	1.27774	1.20774	chloroplast		GO:0005622 intracellular; GO:0005623 cell; GO:0005737 cytoplasm; GO:0009507 chloroplast; GO:0009532 plastid stroma; GO:0009536 plastid; GO:0009570 chloroplast stroma; GO:0043226 organelle; GO:0043227 membrane-bounded organelle; GO:0043229 intracellular organelle; GO:0043231 intracellular membrane-bounded organelle; GO:0044422 organelle part; GO:0044424 intracellular part; GO:0044434 chloroplast p…					PF00004	ATPase family associated with various cellular activities (AAA)
Capana09g002021	84	0.606847	Down	0.0098223	K	"DAPF_ARATH Diaminopimelate epimerase, chloroplastic OS=Arabidopsis thaliana GN=DAPF PE=1 SV=1"	DAPF	1	4.22974e-28	175.69	ESGFVHFVK(1)YHGLGNDFILVDNR	3	-2.6025	15	1.2264	1.1332	1.15343	0.692913	0.587065	0.85189	1.84876	2.03039	1.84946	0.681774	0.7862		0.671875								0.543779	0.083395			chloroplast				K01778	dapF; diaminopimelate epimerase [EC:5.1.1.7]	cann00300 Lysine biosynthesis; cann01100 Metabolic pathways; cann01110 Biosynthesis of secondary metabolites; cann01230 Biosynthesis of amino acids	PF01678	Diaminopimelate epimerase
Capana10g001389	337	0.371223	Down	0.0165994	K	"RCA2_TOBAC Ribulose bisphosphate carboxylase/oxygenase activase 2, chloroplastic OS=Nicotiana tabacum GN=RCA PE=2 SV=1"	RCA	1	1.11104e-16	132.93	LLEYGNMLVK(1)EQENVK(1)R	2	8.7685	28	1.72813	1.03524	1.32653		0.46614	0.546039	1.0881	0.749518	0.486486		0.669894	0.81092		1.16236	1.36537	1.64303	0.828107	1.13247	0.055135		0.528908	1.52688	1.26537	1.18095	chloroplast		GO:0005622 intracellular; GO:0005623 cell; GO:0005737 cytoplasm; GO:0009507 chloroplast; GO:0009532 plastid stroma; GO:0009536 plastid; GO:0009570 chloroplast stroma; GO:0043226 organelle; GO:0043227 membrane-bounded organelle; GO:0043229 intracellular organelle; GO:0043231 intracellular membrane-bounded organelle; GO:0044422 organelle part; GO:0044424 intracellular part; GO:0044434 chloroplast p…					PF00004	ATPase family associated with various cellular activities (AAA)
Capana10g001943	127	1.69409	Up	0.029503	K	"PR2E2_ORYSJ Peroxiredoxin-2E-2, chloroplastic OS=Oryza sativa subsp. japonica GN=PRXIIE-2 PE=1 SV=1"	PRXIIE-2	1	0.00123436	85.622	HLPGFVEK(1)SK	2	-7.5133	16		0.826783	0.709838		1.23264	1.37054	0.730144	0.82197		0.899476			0.997831	1.01383	1.08087	0.921516	0.805714	1.07016				0.799043	1.14314	1.18996	chloroplast	GO:0006950 response to stress; GO:0006952 defense response; GO:0009605 response to external stimulus; GO:0009607 response to biotic stimulus; GO:0009617 response to bacterium; GO:0042742 defense response to bacterium; GO:0043207 response to external biotic stimulus; GO:0050896 response to stimulus; GO:0051704 multi-organism process; GO:0051707 response to other organism; GO:0098542 defense respon…	GO:0005618 cell wall; GO:0005622 intracellular; GO:0005623 cell; GO:0005737 cytoplasm; GO:0009505 plant-type cell wall; GO:0009507 chloroplast; GO:0009526 plastid envelope; GO:0009532 plastid stroma; GO:0009536 plastid; GO:0009570 chloroplast stroma; GO:0009579 thylakoid; GO:0009941 chloroplast envelope; GO:0030312 external encapsulating structure; GO:0031967 organelle envelope; GO:0031975 envelo…					PF08534	Redoxin
Capana11g002133	771	2.06751	Up	0.0102775	K	ENPL_HORVU Endoplasmin homolog OS=Hordeum vulgare PE=2 SV=1	---	1	6.20492e-33	170.95	ILEVNPDHPIIK(1)DLNAACK	3	-3.8757	28	0.62014	0.728033	0.567368		1.17403	1.46623	0.607244	1.39281	1.48078	1.08262	0.546779	0.607768	2.15	0.895582	0.901961	0.969436	1.00866	1.02279	1.29087		0.548991	1.01362		0.818182	chloroplast	GO:0001101 response to acid chemical; GO:0006605 protein targeting; GO:0006810 transport; GO:0006886 intracellular protein transport; GO:0006950 response to stress; GO:0006970 response to osmotic stress; GO:0007275 multicellular organism development; GO:0008104 protein localization; GO:0009266 response to temperature stimulus; GO:0009314 response to radiation; GO:0009408 response to heat; GO:0009…	GO:0005622 intracellular; GO:0005623 cell; GO:0005737 cytoplasm; GO:0005739 mitochondrion; GO:0005773 vacuole; GO:0005774 vacuolar membrane; GO:0005783 endoplasmic reticulum; GO:0005788 endoplasmic reticulum lumen; GO:0009507 chloroplast; GO:0009526 plastid envelope; GO:0009532 plastid stroma; GO:0009536 plastid; GO:0009570 chloroplast stroma; GO:0009941 chloroplast envelope; GO:0012505 endomembr…	GO:0000166 nucleotide binding; GO:0005488 binding; GO:0005515 protein binding; GO:0005524 ATP binding; GO:0008144 drug binding; GO:0017076 purine nucleotide binding; GO:0030554 adenyl nucleotide binding; GO:0032553 ribonucleotide binding; GO:0032555 purine ribonucleotide binding; GO:0032559 adenyl ribonucleotide binding; GO:0035639 purine ribonucleoside triphosphate binding; GO:0036094 small mole…	K09487	HSP90B, TRA1; heat shock protein 90kDa beta	cann04141 Protein processing in endoplasmic reticulum; cann04626 Plant-pathogen interaction	PF02518	Histidine kinase-, DNA gyrase B-, and HSP90-like ATPase
Capana12g000287	17	1.59756	Up	0.035498	K	R13A4_ARATH 60S ribosomal protein L13a-4 OS=Arabidopsis thaliana GN=RPL13AD PE=2 SV=1	RPL13AD	1	0.00433203	75.243	APSK(1)ILWR	2	-7.6166	16	0.817298		0.705776	1.15128		1.28193	0.769063	0.718216					1.16698	1.13273		1.14286	1.06458	1.10659	0.944493	0.618076	0.823911				chloroplast	GO:0006412 translation; GO:0006518 peptide metabolic process; GO:0006807 nitrogen compound metabolic process; GO:0008152 metabolic process; GO:0009058 biosynthetic process; GO:0009059 macromolecule biosynthetic process; GO:0009987 cellular process; GO:0010467 gene expression; GO:0019538 protein metabolic process; GO:0034641 cellular nitrogen compound metabolic process; GO:0034645 cellular macromo…	GO:0005622 intracellular; GO:0005623 cell; GO:0005737 cytoplasm; GO:0005829 cytosol; GO:0005840 ribosome; GO:0015934 large ribosomal subunit; GO:0022625 cytosolic large ribosomal subunit; GO:0022626 cytosolic ribosome; GO:0032991 macromolecular complex; GO:0043226 organelle; GO:0043228 non-membrane-bounded organelle; GO:0043229 intracellular organelle; GO:0043232 intracellular non-membrane-bounde…	GO:0003676 nucleic acid binding; GO:0003723 RNA binding; GO:0003729 mRNA binding; GO:0003735 structural constituent of ribosome; GO:0005198 structural molecule activity; GO:0005488 binding; GO:0097159 organic cyclic compound binding; GO:1901363 heterocyclic compound binding;	K02872	RP-L13Ae, RPL13A; large subunit ribosomal protein L13Ae	cann03010 Ribosome
Capana12g000446	14	1.62074	Up	0.0050753	K	RS6_ASPOF 40S ribosomal protein S6 OS=Asparagus officinalis GN=rps6 PE=2 SV=1	rps6	1	4.69395e-33	183.57	FNIANPTTGCQK(1)K	2	2.1514	26	0.735562	0.790468	0.815966	1.08784	1.43353	1.2744	1.17724		1.17421	0.662162	0.646245	0.740913	1.12894	1.08333	1.06863	5.62722	0.677626	0.941837	0.982429	0.917453	1.0583	0.908766	0.954386	0.913732	nucleus				K02991	RP-S6e, RPS6; small subunit ribosomal protein S6e	cann03010 Ribosome
Capana12g000479	161	2.61252	Up	0.0103766	K	"GCSP_SOLTU Glycine dehydrogenase [decarboxylating], mitochondrial OS=Solanum tuberosum GN=GDCSP PE=2 SV=1"	GDCSP	1	2.11681e-24	114.5	TFLIASNCHPQTIDICK(1)TR	3	0.26558	21	0.302691	0.539535	0.549592	1.25297	1.0062	1.37699		1.3836	1.68501	1.18557	0.510671		1.70563	0.972198	1.03965	0.936978	0.952157		0.971308	0.456976	0.603448	1.21771	1.13497		cytoskeleton	GO:0001505 regulation of neurotransmitter levels; GO:0006082 organic acid metabolic process; GO:0006520 cellular amino acid metabolic process; GO:0006544 glycine metabolic process; GO:0006546 glycine catabolic process; GO:0006807 nitrogen compound metabolic process; GO:0008152 metabolic process; GO:0009056 catabolic process; GO:0009063 cellular amino acid catabolic process; GO:0009069 serine fami…	GO:0005576 extracellular region; GO:0005622 intracellular; GO:0005623 cell; GO:0005737 cytoplasm; GO:0005739 mitochondrion; GO:0009507 chloroplast; GO:0009526 plastid envelope; GO:0009532 plastid stroma; GO:0009534 chloroplast thylakoid; GO:0009536 plastid; GO:0009570 chloroplast stroma; GO:0009579 thylakoid; GO:0009941 chloroplast envelope; GO:0031967 organelle envelope; GO:0031975 envelope; GO:…		K00281	GLDC, gcvP; glycine dehydrogenase [EC:1.4.4.2]	cann00260 Glycine, serine and threonine metabolism; cann00630 Glyoxylate and dicarboxylate metabolism; cann01100 Metabolic pathways; cann01110 Biosynthesis of secondary metabolites; cann01200 Carbon metabolism	PF02347	Glycine cleavage system P-protein
Capana12g001353	801	1.85701	Up	0.014938	K	"CLPAB_SOLLC ATP-dependent Clp protease ATP-binding subunit clpA homolog CD4B, chloroplastic OS=Solanum lycopersicum GN=CD4B PE=3 SV=1"	CD4B	1	0.000227419	123.42	IK(1)SLVTEELK	2	-8.1173	20	0.570489	0.632519	0.556914		0.93038	1.24841		1.19447	1.25761		0.643592	1.24954	1.37849	1.06468	0.912953	1.10436		1.1137	1.14767	0.874893	0.784549	1.51829	1.44227	1.29038	chloroplast				K03696	clpC; ATP-dependent Clp protease ATP-binding subunit ClpC		PF00004; PF07724; PF10431	ATPase family associated with various cellular activities (AAA); AAA domain (Cdc48 subfamily); C-terminal, D2-small domain, of ClpB protein
Capana12g002101	57	1.78418	Up	0.026382	K	CP19C_ARATH Peptidyl-prolyl cis-trans isomerase CYP19-3 OS=Arabidopsis thaliana GN=CYP19-3 PE=2 SV=2	CYP19-3	1	8.54733e-08	146.27	PLHYK(1)GSGFHR	3	-2.644	29	0.732212	0.737606		1.36374	1.08333	1.48654	1.20595	1.09335		0.870184	0.8594	0.944	1.18427	1.01259	0.683744	0.935564		0.918618	1.18465	1.0226	1.02873		1.01869	0.90732	cytoplasm	GO:0000413 protein peptidyl-prolyl isomerization; GO:0006464 cellular protein modification process; GO:0006807 nitrogen compound metabolic process; GO:0007154 cell communication; GO:0007165 signal transduction; GO:0008152 metabolic process; GO:0009987 cellular process; GO:0010035 response to inorganic substance; GO:0010038 response to metal ion; GO:0018193 peptidyl-amino acid modification; GO:001…	GO:0005622 intracellular; GO:0005623 cell; GO:0005737 cytoplasm; GO:0005739 mitochondrion; GO:0005794 Golgi apparatus; GO:0005829 cytosol; GO:0012505 endomembrane system; GO:0043226 organelle; GO:0043227 membrane-bounded organelle; GO:0043229 intracellular organelle; GO:0043231 intracellular membrane-bounded organelle; GO:0044424 intracellular part; GO:0044444 cytoplasmic part; GO:0044464 cell pa…	GO:0003755 peptidyl-prolyl cis-trans isomerase activity; GO:0003824 catalytic activity; GO:0005488 binding; GO:0008144 drug binding; GO:0016018 cyclosporin A binding; GO:0016853 isomerase activity; GO:0016859 cis-trans isomerase activity; GO:0033218 amide binding; GO:0042277 peptide binding;	K01802	E5.2.1.8; peptidylprolyl isomerase [EC:5.2.1.8]		PF00160	Cyclophilin type peptidyl-prolyl cis-trans isomerase/CLD
Capana12g002751	58	0.65121	Down	0.030875	K	GEDH1_OCIBA Geraniol dehydrogenase 1 OS=Ocimum basilicum GN=GEDH1 PE=1 SV=1	GEDH1	1	1.43888e-09	117.8	IFYCGICHTDLHFLK(1)NEWGVTR	3	0.37566	13	1.45484		1.73817	1.18191	1.00197	0.935103	1.59589	1.39511	1.56923				0.428		0.830092										cytoplasm				K23232	cann00902 Monoterpenoid biosynthesis; cann01100 Metabolic pathways; cann01110 Biosynthesis of secondary metabolites		PF08240	Alcohol dehydrogenase GroES-like domain
Protein accession	Position	A3/A1 Ratio	Regulated Type	A3/A1 P value	Amino acid	Protein description	Gene name	Localization probability	PEP	Score	Modified sequence	Charge	Mass error [ppm]	MS/MS Count	A1_1	A1_2	A1_3	A2_1	A2_2	A2_3	A3_1	A3_2	A3_3	A4_1	A4_2	A4_3	B1_1	B1_2	B1_3	B2_1	B2_2	B2_3	B3_1	B3_2	B3_3	B4_1	B4_2	B4_3	Subcellular localization	Biological Process	Cellular Component	Molecular Function	KEGG KO No.	KEGG Gene	KEGG pathway	Pfam ID	Domain description
Capana00g000465	187	0.648805	Down	0.0076632	K	OLP1_SOLLC Osmotin-like protein OS=Solanum lycopersicum PE=1 SV=1	---	1	8.60138e-33	182.52	SHGGHGPVVGCK(1)SGCEAYK	2	-1.6361	38	1.19084	1.283	1.39607	1.23386	1.26788	1.28239	0.958435	0.742857	0.809524	0.926659	0.976443	0.971264	1.22162	1.17602	1.17807	0.784156	0.777911	0.822353	0.885551	0.983776	1.07817	0.668481	0.817797	0.707849	chloroplast							PF00314	Thaumatin family
Capana00g000900	128	0.648116	Down	9.9949e-05	K	"ADT1_SOLTU ADP,ATP carrier protein, mitochondrial OS=Solanum tuberosum GN=ANT PE=2 SV=1"	ANT	1	1.52871e-62	216.04	LSEPYK(1)GIGDCFGR	2	-4.7412	24	1.47924	1.4061	1.38444	1.46728	1.57385	1.52498	0.903865	0.958643	0.90481	0.765217	0.671199		1.045	1.11154	1.24022	1.14891	1.08637	1.01414	0.938338	0.787072	0.759662	0.480721	0.504325	0.475867	chloroplast		GO:0005622 intracellular; GO:0005623 cell; GO:0005737 cytoplasm; GO:0005739 mitochondrion; GO:0005740 mitochondrial envelope; GO:0005743 mitochondrial inner membrane; GO:0016020 membrane; GO:0019866 organelle inner membrane; GO:0031090 organelle membrane; GO:0031966 mitochondrial membrane; GO:0031967 organelle envelope; GO:0031975 envelope; GO:0043226 organelle; GO:0043227 membrane-bounded organe…		K05863	SLC25A4S, ANT; solute carrier family 25 (mitochondrial adenine nucleotide translocator), member 4/5/6/31
Capana00g000900	327	0.661832	Down	0.021659	K	"ADT1_SOLTU ADP,ATP carrier protein, mitochondrial OS=Solanum tuberosum GN=ANT PE=2 SV=1"	ANT	1	8.26577e-38	192.14	YK(1)SSLDAFSQIVR	2	-6.1786	20	1.31321	1.16342	1.05073	1.36605	1.2974	1.01225	0.804757	0.885472	0.644289	0.990062	0.92707	0.989424	1.20342	1.10577	0.897579	1.24565	1.34756		1.05362		0.922705	0.770522			chloroplast		GO:0005622 intracellular; GO:0005623 cell; GO:0005737 cytoplasm; GO:0005739 mitochondrion; GO:0005740 mitochondrial envelope; GO:0005743 mitochondrial inner membrane; GO:0016020 membrane; GO:0019866 organelle inner membrane; GO:0031090 organelle membrane; GO:0031966 mitochondrial membrane; GO:0031967 organelle envelope; GO:0031975 envelope; GO:0043226 organelle; GO:0043227 membrane-bounded organe…		K05863	SLC25A4S, ANT; solute carrier family 25 (mitochondrial adenine nucleotide translocator), member 4/5/6/31
Capana00g001018	402	0.639757	Down	0.0192365	K	SIR_SYNY3 Sulfite reductase [ferredoxin] OS=Synechocystis sp. (strain PCC 6803 / Kazusa) GN=sir PE=1 SV=1	sir	1	3.46514e-19	111.98	K(1)FEPCHELPEWEFK	2	-1.4815	32	1.13675	1.05778	1.09991	1.39589	1.31507		0.675042	0.570707	0.861893	0.73913	0.606897		1.38329	0.925164		1.03707	0.895062	0.924925	0.7082	0.698364	0.851606				cytoplasm	GO:0006275 regulation of DNA replication; GO:0006323 DNA packaging; GO:0006355 regulation of transcription, DNA-templated; GO:0006790 sulfur compound metabolic process; GO:0006950 response to stress; GO:0006970 response to osmotic stress; GO:0006996 organelle organization; GO:0008152 metabolic process; GO:0009266 response to temperature stimulus; GO:0009409 response to cold; GO:0009628 response t…	GO:0005576 extracellular region; GO:0005622 intracellular; GO:0005623 cell; GO:0005737 cytoplasm; GO:0009295 nucleoid; GO:0009507 chloroplast; GO:0009526 plastid envelope; GO:0009532 plastid stroma; GO:0009536 plastid; GO:0009570 chloroplast stroma; GO:0009941 chloroplast envelope; GO:0010319 stromule; GO:0016020 membrane; GO:0031967 organelle envelope; GO:0031975 envelope; GO:0042644 chloroplast…	GO:0003676 nucleic acid binding; GO:0003677 DNA binding; GO:0003690 double-stranded DNA binding; GO:0003824 catalytic activity; GO:0005488 binding; GO:0005507 copper ion binding; GO:0016002 sulfite reductase activity; GO:0016491 oxidoreductase activity; GO:0016667 oxidoreductase activity, acting on a sulfur group of donors; GO:0016673 oxidoreductase activity, acting on a sulfur group of donors, i…	K00392	sir; sulfite reductase (ferredoxin) [EC:1.8.7.1]	cann00920 Sulfur metabolism; cann01100 Metabolic pathways
Capana00g001096	137	1.82951	Up	0.0038757	K	"G3PC_PETHY Glyceraldehyde-3-phosphate dehydrogenase, cytosolic OS=Petunia hybrida GN=GAPC PE=2 SV=1"	GAPC	1	1.32835e-07	117.3	TVDGPSMK(1)DWR	2	-5.8949	21	0.719298	0.631634	0.658607	0.96786	0.897032	0.874886	1.07587	1.45427	1.14632	0.797903	0.837234	0.886297		1.07932	0.81492			1.38076	1.13507	1.17245	0.928499	1.13308	1.17659	1.17828	cytoplasm				K00134	GAPDH, gapA; glyceraldehyde 3-phosphate dehydrogenase [EC:1.2.1.12]	cann00010 Glycolysis / Gluconeogenesis; cann00710 Carbon fixation in photosynthetic organisms; cann01100 Metabolic pathways; cann01110 Biosynthesis of secondary metabolites; cann01200 Carbon metabolism; cann01230 Biosynthesis of amino acids	PF00044; PF02800	Glyceraldehyde 3-phosphate dehydrogenase, NAD binding domain; Glyceraldehyde 3-phosphate dehydrogenase, C-terminal domain
Capana00g001096	62	0.431302	Down	0.0098778	K	"G3PC_PETHY Glyceraldehyde-3-phosphate dehydrogenase, cytosolic OS=Petunia hybrida GN=GAPC PE=2 SV=1"	GAPC	1	7.00654e-11	164.3	YDTVHGQWK(1)HHELK(1)VQDEK	3	4.1728	27	1.66338	1.91051	1.43134	1.77594	1.34787	1.34977	0.724708	0.713568	0.720484	0.621544	0.756383	0.725948	0.756991	0.806225	0.779981	0.666667	1.13689	1.05527	1.28036	0.548896		0.552281		0.665984	cytoplasm				K00134	GAPDH, gapA; glyceraldehyde 3-phosphate dehydrogenase [EC:1.2.1.12]	cann00010 Glycolysis / Gluconeogenesis; cann00710 Carbon fixation in photosynthetic organisms; cann01100 Metabolic pathways; cann01110 Biosynthesis of secondary metabolites; cann01200 Carbon metabolism; cann01230 Biosynthesis of amino acids	PF00044; PF02800	Glyceraldehyde 3-phosphate dehydrogenase, NAD binding domain; Glyceraldehyde 3-phosphate dehydrogenase, C-terminal domain
Capana00g001503	345	0.611486	Down	0.00056334	K	RD21A_ARATH Cysteine proteinase RD21a OS=Arabidopsis thaliana GN=RD21A PE=1 SV=1	RD21A	1	9.68147e-18	145.08	NSWGK(1)SWGEHGYLK	2	-3.8438	23	1.50596	1.56472	1.57733	1.60275	1.60089		1.03369	0.879682	0.928817	0.792287	0.914603	0.810767	1.34471	1.41563	1.26635	0.902439	0.902985	0.774857	0.551905	0.778934	0.669323	0.594833	0.537196	0.628319	extracellular	GO:0006508 proteolysis; GO:0006807 nitrogen compound metabolic process; GO:0007275 multicellular organism development; GO:0008152 metabolic process; GO:0009056 catabolic process; GO:0009057 macromolecule catabolic process; GO:0009555 pollen development; GO:0009987 cellular process; GO:0019538 protein metabolic process; GO:0030163 protein catabolic process; GO:0032501 multicellular organismal proc…	GO:0000323 lytic vacuole; GO:0005576 extracellular region; GO:0005615 extracellular space; GO:0005622 intracellular; GO:0005623 cell; GO:0005737 cytoplasm; GO:0005764 lysosome; GO:0005773 vacuole; GO:0043226 organelle; GO:0043227 membrane-bounded organelle; GO:0043229 intracellular organelle; GO:0043231 intracellular membrane-bounded organelle; GO:0044421 extracellular region part; GO:0044424 int…	GO:0003824 catalytic activity; GO:0004175 endopeptidase activity; GO:0004197 cysteine-type endopeptidase activity; GO:0008233 peptidase activity; GO:0008234 cysteine-type peptidase activity; GO:0016787 hydrolase activity; GO:0070011 peptidase activity, acting on L-amino acid peptides;				PF08246; PF00112	Cathepsin propeptide inhibitor domain (I29); Papain family cysteine protease
Capana00g001862	96	2.09475	Up	0.02556	K	CYPH_SOLLC Peptidyl-prolyl cis-trans isomerase OS=Solanum lycopersicum GN=CYP PE=2 SV=1	CYP	1	0.000497095	133.9	FADENFK(1)R	2	5.1672	25	0.431628	0.874747	0.720314	0.447628	1.40654	1.46649	1.42459	1.59096	1.22986	1.29326	0.774686	1.23712	1.61099	1.29969	1.07677	1.07113	0.912449	0.820972	0.825266	0.398034	0.980815	0.674315	0.884848	0.781227	chloroplast	GO:0000413 protein peptidyl-prolyl isomerization; GO:0006464 cellular protein modification process; GO:0006807 nitrogen compound metabolic process; GO:0007154 cell communication; GO:0007165 signal transduction; GO:0008152 metabolic process; GO:0009987 cellular process; GO:0018193 peptidyl-amino acid modification; GO:0018208 peptidyl-proline modification; GO:0019538 protein metabolic process; GO:0…	GO:0005576 extracellular region; GO:0005622 intracellular; GO:0005623 cell; GO:0005737 cytoplasm; GO:0005773 vacuole; GO:0005774 vacuolar membrane; GO:0005794 Golgi apparatus; GO:0005829 cytosol; GO:0005886 plasma membrane; GO:0005911 cell-cell junction; GO:0009506 plasmodesma; GO:0009507 chloroplast; GO:0009536 plastid; GO:0012505 endomembrane system; GO:0016020 membrane; GO:0030054 cell junctio…	GO:0003755 peptidyl-prolyl cis-trans isomerase activity; GO:0003824 catalytic activity; GO:0005488 binding; GO:0008144 drug binding; GO:0016018 cyclosporin A binding; GO:0016853 isomerase activity; GO:0016859 cis-trans isomerase activity; GO:0033218 amide binding; GO:0042277 peptide binding;	K01802	E5.2.1.8; peptidylprolyl isomerase [EC:5.2.1.8]		PF00160	Cyclophilin type peptidyl-prolyl cis-trans isomerase/CLD
Capana00g002110	55	2.13871	Up	0.025643	K	"LACS7_ARATH Long chain acyl-CoA synthetase 7, peroxisomal OS=Arabidopsis thaliana GN=LACS7 PE=1 SV=2"	LACS7	1	0.00398325	93.467	LQTGK(1)WNVYR	2	0.20739	16	0.448947	0.482553	0.562334			0.846734	0.842937		1.28698		0.993311		1.24667	1.16105	0.996265	1.03883	1.05696	1.11343	1.2221	0.927332	0.878363				chloroplast	GO:0000302 response to reactive oxygen species; GO:0001101 response to acid chemical; GO:0001676 long-chain fatty acid metabolic process; GO:0006082 organic acid metabolic process; GO:0006629 lipid metabolic process; GO:0006631 fatty acid metabolic process; GO:0006950 response to stress; GO:0006970 response to osmotic stress; GO:0006979 response to oxidative stress; GO:0008152 metabolic process; …	GO:0005622 intracellular; GO:0005623 cell; GO:0005737 cytoplasm; GO:0005777 peroxisome; GO:0042579 microbody; GO:0043226 organelle; GO:0043227 membrane-bounded organelle; GO:0043229 intracellular organelle; GO:0043231 intracellular membrane-bounded organelle; GO:0044424 intracellular part; GO:0044444 cytoplasmic part; GO:0044464 cell part;	GO:0003824 catalytic activity; GO:0004467 long-chain fatty acid-CoA ligase activity; GO:0015645 fatty acid ligase activity; GO:0016405 CoA-ligase activity; GO:0016874 ligase activity; GO:0016877 ligase activity, forming carbon-sulfur bonds; GO:0016878 acid-thiol ligase activity;	K01897	ACSL, fadD; long-chain acyl-CoA synthetase [EC:6.2.1.3]	cann00061 Fatty acid biosynthesis; cann00071 Fatty acid degradation; cann01100 Metabolic pathways; cann01212 Fatty acid metabolism; cann04146 Peroxisome	PF13193	Domain of unknown function (DUF4009)
Capana00g002241	149	0.588966	Down	0.028421	K	VIPI_SCHPO Protein vip1 OS=Schizosaccharomyces pombe (strain 972 / ATCC 24843) GN=vip1 PE=1 SV=1	vip1	1	1.6396e-32	196.38	SFDEK(1)HQLTSTASAK	2	1.0212	38		1.60939	1.6261	1.27825	1.74839	1.30084	1.04		0.865591		1.29456	1.23436	1.30788		0.861919	0.993541	1.11926	1.61577	1.22864	0.797197	0.777494		0.225564	0.223319	cytoplasm			GO:0003676 nucleic acid binding; GO:0003723 RNA binding; GO:0005488 binding; GO:0097159 organic cyclic compound binding; GO:1901363 heterocyclic compound binding;				PF00076	RNA recognition motif. (a.k.a. RRM, RBD, or RNP domain)
Capana00g002731	337	0.665172	Down	0.004759	K	"6PGD_SYNE7 6-phosphogluconate dehydrogenase, decarboxylating OS=Synechococcus elongatus (strain PCC 7942) GN=gnd PE=1 SV=4"	gnd	1	5.23218e-68	229.44	VFK(1)SCGVSDILVEQSVDKK	3	-7.4669	21	1.17753	1.25841	1.26912	1.52603	1.63024	1.63738	0.937439	0.756422	0.770642	0.619565	0.772778	0.62203	1.13842	1.10994	1.21715	0.58941	0.653668	0.574144	0.610827		0.605042		0.456215		chloroplast	GO:0000003 reproduction; GO:0001101 response to acid chemical; GO:0006950 response to stress; GO:0006970 response to osmotic stress; GO:0008037 cell recognition; GO:0008152 metabolic process; GO:0009266 response to temperature stimulus; GO:0009409 response to cold; GO:0009414 response to water deprivation; GO:0009415 response to water; GO:0009566 fertilization; GO:0009567 double fertilization for…	GO:0005622 intracellular; GO:0005623 cell; GO:0005737 cytoplasm; GO:0005777 peroxisome; GO:0005829 cytosol; GO:0009507 chloroplast; GO:0009532 plastid stroma; GO:0009536 plastid; GO:0009570 chloroplast stroma; GO:0019822 P4 peroxisome; GO:0042579 microbody; GO:0043226 organelle; GO:0043227 membrane-bounded organelle; GO:0043229 intracellular organelle; GO:0043231 intracellular membrane-bounded or…	GO:0003824 catalytic activity; GO:0004616 phosphogluconate dehydrogenase (decarboxylating) activity; GO:0016491 oxidoreductase activity; GO:0016614 oxidoreductase activity, acting on CH-OH group of donors; GO:0016616 oxidoreductase activity, acting on the CH-OH group of donors, NAD or NADP as acceptor;	K00033	PGD, gnd, gntZ; 6-phosphogluconate dehydrogenase [EC:1.1.1.44 1.1.1.343]	cann00030 Pentose phosphate pathway; cann00480 Glutathione metabolism; cann01100 Metabolic pathways; cann01110 Biosynthesis of secondary metabolites; cann01200 Carbon metabolism	PF03446; PF00393	NAD binding domain of 6-phosphogluconate dehydrogenase; 6-phosphogluconate dehydrogenase, C-terminal domain
Capana00g003085	148	0.616342	Down	3.9306e-05	K	ABA2_ARATH Xanthoxin dehydrogenase OS=Arabidopsis thaliana GN=ABA2 PE=1 SV=1	ABA2	1	1.05546e-07	105.81	GIFLGIK(1)HAAR	2	-7.3656	24	1.14504	1.22397	1.22642	1.34791	1.38867	1.19158	0.751659	0.7277	0.736652	0.835417	0.931563	0.87592	0.977549	1.186	1.18537	0.872043	0.884742	0.906951	0.73943	0.98191	0.849206	0.970742	1.03209	1.00418	chloroplast	GO:0001101 response to acid chemical; GO:0006066 alcohol metabolic process; GO:0006082 organic acid metabolic process; GO:0006520 cellular amino acid metabolic process; GO:0006560 proline metabolic process; GO:0006561 proline biosynthetic process; GO:0006629 lipid metabolic process; GO:0006714 sesquiterpenoid metabolic process; GO:0006720 isoprenoid metabolic process; GO:0006721 terpenoid metabol…	GO:0005622 intracellular; GO:0005623 cell; GO:0005737 cytoplasm; GO:0005829 cytosol; GO:0044424 intracellular part; GO:0044444 cytoplasmic part; GO:0044464 cell part;	GO:0003824 catalytic activity; GO:0004022 alcohol dehydrogenase (NAD) activity; GO:0010301 xanthoxin dehydrogenase activity; GO:0016491 oxidoreductase activity; GO:0016614 oxidoreductase activity, acting on CH-OH group of donors; GO:0016616 oxidoreductase activity, acting on the CH-OH group of donors, NAD or NADP as acceptor;	K09841	ABA2; xanthoxin dehydrogenase [EC:1.1.1.288]	cann00906 Carotenoid biosynthesis; cann01100 Metabolic pathways; cann01110 Biosynthesis of secondary metabolites	PF13561	Enoyl-(Acyl carrier protein) reductase
Capana00g003105	101	0.595476	Down	0.0072007	K	GSTX4_TOBAC Probable glutathione S-transferase OS=Nicotiana tabacum PE=2 SV=1	---	1	5.19055e-41	175.54	IWSSK(1)VEVHETANK	2	-2.8406	22	1.14324	1.33397	1.17366	1.18382	0.98832		0.77277	0.67657		0.903044	1.14467	0.82538	1.07173	1.26782	1.28397	0.957406	0.894587	0.872007	0.92246	0.969962	0.88081	1.14676	0.862799	1.01468	cytoplasm	GO:0006518 peptide metabolic process; GO:0006575 cellular modified amino acid metabolic process; GO:0006749 glutathione metabolic process; GO:0006790 sulfur compound metabolic process; GO:0006807 nitrogen compound metabolic process; GO:0008152 metabolic process; GO:0009056 catabolic process; GO:0009404 toxin metabolic process; GO:0009407 toxin catabolic process; GO:0009636 response to toxic subst…	GO:0005622 intracellular; GO:0005623 cell; GO:0005737 cytoplasm; GO:0044424 intracellular part; GO:0044464 cell part;	GO:0003824 catalytic activity; GO:0004364 glutathione transferase activity; GO:0016740 transferase activity; GO:0016765 transferase activity, transferring alkyl or aryl (other than methyl) groups;	K00799	GST, gst; glutathione S-transferase [EC:2.5.1.18]	cann00480 Glutathione metabolism; cann01100 Metabolic pathways	PF02798; PF13410	Glutathione S-transferase, N-terminal domain; Glutathione S-transferase, C-terminal domain
Capana00g003291	557	0.317633	Down	0.0002189	K	"PP178_ARATH Pentatricopeptide repeat-containing protein At2g31400, chloroplastic OS=Arabidopsis thaliana GN=At2g31400 PE=2 SV=1"	At2g31400	1	7.31069e-07	132.9	VEVK(1)NNYPVSSSGQGK	2	2.7265	23	1.33588	1.38677	1.46084	1.3072	1.52119	1.11846	0.418401		0.467475				1.1619		1.19902	0.536511		0.685451	0.451717					0.503636	plasma membrane							PF13620	Carboxypeptidase regulatory-like domain
Capana00g003536	53	1.77107	Up	0.020422	K	14339_SOLLC 14-3-3 protein 9 OS=Solanum lycopersicum GN=TFT9 PE=2 SV=2	TFT9	1	1.88859e-12	150.44	NLLSVGYK(1)NVVGSR	2	3.4006	24	0.607048	0.833026	0.698944	1.16488	1.00538	1.10296	1.00289	1.26013	1.52533	1.16697	0.810811	0.954386	1.57572	0.865705	0.814465	1.16715	1.23241	1.28397	1.07073	0.704785	0.753213	0.738333	0.7	0.791594	cytoplasm				K06630	YWHAE; 14-3-3 protein epsilon		PF00244	14-3-3 protein
Capana00g003563	659	1.71515	Up	0.0088849	K	NUA_ARATH Nuclear-pore anchor OS=Arabidopsis thaliana GN=NUA PE=1 SV=1	NUA	1	0.000226006	117.3	VK(1)SLEEESSR	2	-4.5734	10	0.51671		0.60047				1.05673	0.935192	0.882275				1.42049		1.29006		0.943615				0.80805		1.39552		nucleus	GO:0000003 reproduction; GO:0000075 cell cycle checkpoint; GO:0000278 mitotic cell cycle; GO:0003006 developmental process involved in reproduction; GO:0006403 RNA localization; GO:0006405 RNA export from nucleus; GO:0006406 mRNA export from nucleus; GO:0006611 protein export from nucleus; GO:0006810 transport; GO:0006886 intracellular protein transport; GO:0006913 nucleocytoplasmic transport; GO…	GO:0005622 intracellular; GO:0005623 cell; GO:0005634 nucleus; GO:0005635 nuclear envelope; GO:0005643 nuclear pore; GO:0005730 nucleolus; GO:0005737 cytoplasm; GO:0005829 cytosol; GO:0005911 cell-cell junction; GO:0009506 plasmodesma; GO:0009507 chloroplast; GO:0009536 plastid; GO:0012505 endomembrane system; GO:0030054 cell junction; GO:0031967 organelle envelope; GO:0031974 membrane-enclosed l…		K09291	TPR, MLP1, MLP2; nucleoprotein TPR	cann03013 RNA transport
Capana00g003566	137	0.578628	Down	0.035064	K	TAS_SHIFL Protein tas OS=Shigella flexneri GN=tas PE=3 SV=1	tas	1	5.94421e-54	200.06	VILATK(1)VCGYSER	2	-5.7817	24	1.63338	1.26915	1.16093	1.67126	1.58678	2.04771	0.805802	0.775889	0.769541	0.644426		1.15715	1.09325		1.11343	0.975031	0.956715	0.752941	1.5277	0.503106	0.512169		0.466173	0.493392	chloroplast							PF00248	Aldo/keto reductase family
Capana00g004062	182	0.559848	Down	0.0138785	K	OLA1_CHICK Obg-like ATPase 1 OS=Gallus gallus GN=OLA1 PE=2 SV=1	OLA1	1	1.0595e-07	107.08	QLK(1)IEHELCLR	2	-6.0137	12		1.23002	1.1813	1.4082	1.5678	1.31528		0.719661	0.630314					0.897898		0.625631		0.827902	0.464589		0.65043				cytoskeleton		GO:0005622 intracellular; GO:0005623 cell; GO:0005737 cytoplasm; GO:0044424 intracellular part; GO:0044464 cell part;	GO:0003824 catalytic activity; GO:0016462 pyrophosphatase activity; GO:0016787 hydrolase activity; GO:0016817 hydrolase activity, acting on acid anhydrides; GO:0016818 hydrolase activity, acting on acid anhydrides, in phosphorus-containing anhydrides; GO:0016887 ATPase activity; GO:0017111 nucleoside-triphosphatase activity;	K19788	OLA1; obg-like ATPase 1		PF06071	Protein of unknown function (DUF933)
Capana00g004323	69	0.63502	Down	0.023365	K	"ATPBM_NICPL ATP synthase subunit beta, mitochondrial OS=Nicotiana plumbaginifolia GN=ATPB PE=1 SV=1"	ATPB	1	0.000424719	122.2	PSTPPPK(1)SSGSEPSGK	2	-6.6789	19	1.16409	1.2679	1.2523	1.20768	1.11568	1.27451	0.88634	0.673391		0.683069				1.35595	1.3125	1.00357	1.03973		0.852577	0.956522	0.88899	0.930348	0.857143	0.892885	mitochondria				K02133	ATPeF1B, ATP5B, ATP2; F-type H+-transporting ATPase subunit beta [EC:3.6.3.14]	cann00190 Oxidative phosphorylation; cann01100 Metabolic pathways	PF02874; PF00006	ATP synthase alpha/beta family, beta-barrel domain; ATP synthase alpha/beta family, nucleotide-binding domain
Capana00g004429	80	0.581862	Down	0.020118	K	"ODO2B_ARATH Dihydrolipoyllysine-residue succinyltransferase component of 2-oxoglutarate dehydrogenase complex 2, mitochondrial OS=Arabidopsis thaliana GN=At4g26910 PE=1 SV=2"	At4g26910	1	1.827e-159	193.42	VAIISK(1)SSECVESVDHVAPSEKPSEK	4	-6.6207	39	1.77696	1.65874	1.37583		1.54064	1.5398		1.01656	0.849868	0.756074	0.782468		0.937705	0.95311		1.50526	0.590909		0.569841	0.702658	0.511024	0.220318			cytoplasm	GO:0006950 response to stress; GO:0006979 response to oxidative stress; GO:0050896 response to stimulus;	GO:0005622 intracellular; GO:0005623 cell; GO:0005737 cytoplasm; GO:0005739 mitochondrion; GO:0005829 cytosol; GO:0005840 ribosome; GO:0016020 membrane; GO:0022626 cytosolic ribosome; GO:0032991 macromolecular complex; GO:0043226 organelle; GO:0043227 membrane-bounded organelle; GO:0043228 non-membrane-bounded organelle; GO:0043229 intracellular organelle; GO:0043231 intracellular membrane-bounde…	GO:0005488 binding; GO:0008270 zinc ion binding; GO:0043167 ion binding; GO:0043169 cation binding; GO:0046872 metal ion binding; GO:0046914 transition metal ion binding;	K00658	DLST, sucB; 2-oxoglutarate dehydrogenase E2 component (dihydrolipoamide succinyltransferase) [EC:2.3.1.61]	cann00020 Citrate cycle (TCA cycle); cann00310 Lysine degradation; cann00380 Tryptophan metabolism; cann01100 Metabolic pathways; cann01110 Biosynthesis of secondary metabolites; cann01200 Carbon metabolism	PF00364; PF00198	Biotin-requiring enzyme; 2-oxoacid dehydrogenases acyltransferase (catalytic domain)
Capana00g004560	277	0.558567	Down	0.00142371	K	"POR_DAUCA Protochlorophyllide reductase, chloroplastic OS=Daucus carota GN=POR1 PE=2 SV=1"	POR1	1	1.02396e-54	174.05	DSK(1)VCNMLTMQEFHR	2	1.4305	36	1.16923	1.24762	1.42898	1.1647	1.45091	1.31661	0.698795	0.670551	0.778807		0.77205	0.80023	1.02247	1.13736	1.1436	0.771605	0.838509	0.704092	0.658837	0.879464				0.585519	chloroplast	GO:0008152 metabolic process; GO:0055114 oxidation-reduction process;	GO:0005622 intracellular; GO:0005623 cell; GO:0005737 cytoplasm; GO:0009507 chloroplast; GO:0009526 plastid envelope; GO:0009534 chloroplast thylakoid; GO:0009535 chloroplast thylakoid membrane; GO:0009536 plastid; GO:0009579 thylakoid; GO:0009941 chloroplast envelope; GO:0016020 membrane; GO:0031967 organelle envelope; GO:0031975 envelope; GO:0031976 plastid thylakoid; GO:0031984 organelle subco…	GO:0003824 catalytic activity; GO:0003959 NADPH dehydrogenase activity; GO:0016491 oxidoreductase activity; GO:0016651 oxidoreductase activity, acting on NAD(P)H;	K00218	por; protochlorophyllide reductase [EC:1.3.1.33]	cann00860 Porphyrin and chlorophyll metabolism; cann01100 Metabolic pathways; cann01110 Biosynthesis of secondary metabolites	PF00106	short chain dehydrogenase
Capana00g004663	294	0.585489	Down	0.02022	K	GBLP_NICPL Guanine nucleotide-binding protein subunit beta-like protein OS=Nicotiana plumbaginifolia PE=2 SV=1	---	1	0	295.16	QESEMSAATAEGSTAAK(1)NK	2	-4.6851	22	1.0316	1.01659	1.20403	1.17915	1.26116	1.21351	0.815203	0.51933	0.569604	0.633264		0.819706	1.29275	1.31599	1.55556	0.892518	0.752083	0.979809		0.990071	0.928469	0.800803			chloroplast	GO:0001101 response to acid chemical; GO:0001932 regulation of protein phosphorylation; GO:0001934 positive regulation of protein phosphorylation; GO:0006417 regulation of translation; GO:0006950 response to stress; GO:0006952 defense response; GO:0007275 multicellular organism development; GO:0009605 response to external stimulus; GO:0009607 response to biotic stimulus; GO:0009620 response to fu…	GO:0005622 intracellular; GO:0005623 cell; GO:0005634 nucleus; GO:0005730 nucleolus; GO:0005737 cytoplasm; GO:0005829 cytosol; GO:0005840 ribosome; GO:0005844 polysome; GO:0005886 plasma membrane; GO:0016020 membrane; GO:0022626 cytosolic ribosome; GO:0031974 membrane-enclosed lumen; GO:0031981 nuclear lumen; GO:0032991 macromolecular complex; GO:0042788 polysomal ribosome; GO:0043226 organelle; …	GO:0003735 structural constituent of ribosome; GO:0005078 MAP-kinase scaffold activity; GO:0005198 structural molecule activity; GO:0005488 binding; GO:0005515 protein binding; GO:0019899 enzyme binding; GO:0019900 kinase binding; GO:0032947 protein complex scaffold; GO:0035591 signaling adaptor activity; GO:0060090 binding, bridging;	K14753	RACK1; guanine nucleotide-binding protein subunit beta-2-like 1 protein
Capana00g004765	61	0.648293	Down	0.00136115	K	NCB5R_NEOFI NADH-cytochrome b5 reductase 1 OS=Neosartorya fischeri (strain ATCC 1020 / DSM 3700 / FGSC A1164 / NRRL 181) GN=cbr1 PE=3 SV=2	cbr1	1	1.02855e-07	136.84	TQLSHNVAK(1)FR	2	2.124	45	1.19394	1.26804	1.13783	1.34047	1.31077	1.08356	0.771491	0.720711	0.84153	0.776688	0.954241	0.893054	1.11066	1.23278	1.14599	0.923077	0.688889	0.811523	0.848774	0.966921	0.972149	0.934593	0.955904	0.993343	chloroplast	GO:0006091 generation of precursor metabolites and energy; GO:0008152 metabolic process; GO:0009987 cellular process; GO:0022900 electron transport chain; GO:0044237 cellular metabolic process; GO:0055114 oxidation-reduction process;	GO:0005618 cell wall; GO:0005622 intracellular; GO:0005623 cell; GO:0005737 cytoplasm; GO:0005783 endoplasmic reticulum; GO:0005886 plasma membrane; GO:0009505 plant-type cell wall; GO:0012505 endomembrane system; GO:0016020 membrane; GO:0030312 external encapsulating structure; GO:0043226 organelle; GO:0043227 membrane-bounded organelle; GO:0043229 intracellular organelle; GO:0043231 intracellul…	GO:0003824 catalytic activity; GO:0004128 cytochrome-b5 reductase activity, acting on NAD(P)H; GO:0016491 oxidoreductase activity; GO:0016651 oxidoreductase activity, acting on NAD(P)H; GO:0016653 oxidoreductase activity, acting on NAD(P)H, heme protein as acceptor;	K00326	E1.6.2.2; cytochrome-b5 reductase [EC:1.6.2.2]	cann00520 Amino sugar and nucleotide sugar metabolism	PF00970; PF00175	Oxidoreductase FAD-binding domain; Oxidoreductase NAD-binding domain
Capana00g004910	268	0.638654	Down	0.020997	K	Putative pyridoxamine 5'-phosphate oxidase family protein-like	---	1	8.99151e-08	117.77	QYMAK(1)HQQGPSQQWGNFFYFR	3	-4.3133	12	1.17028	1.16497	1.29491		1.44714	1.33945	0.618285	0.76257	0.937557	0.758889	0.85963	1.3124									0.604585				chloroplast							PF13883	Pyridoxamine 5'-phosphate oxidase
Capana00g005036	887	1.98917	Up	0.0025836	K	"GLTB1_ARATH Ferredoxin-dependent glutamate synthase 1, chloroplastic OS=Arabidopsis thaliana GN=GLU1 PE=1 SV=2"	GLU1	1	0.00056849	113.7	AFSEDTAK(1)R	2	-5.1085	19	0.529818	0.685004	0.736516	0.732394	1.26057	1.323	1.30569	1.35137	1.22449	1.23266				1.03419	0.968097	0.739437	0.769231	0.868313		0.67996		1.35577	1.28941	1.36691	chloroplast	GO:0006082 organic acid metabolic process; GO:0006520 cellular amino acid metabolic process; GO:0006536 glutamate metabolic process; GO:0006537 glutamate biosynthetic process; GO:0006541 glutamine metabolic process; GO:0006807 nitrogen compound metabolic process; GO:0008152 metabolic process; GO:0008652 cellular amino acid biosynthetic process; GO:0009058 biosynthetic process; GO:0009064 glutamin…	GO:0005576 extracellular region; GO:0005622 intracellular; GO:0005623 cell; GO:0005737 cytoplasm; GO:0005739 mitochondrion; GO:0005759 mitochondrial matrix; GO:0009507 chloroplast; GO:0009526 plastid envelope; GO:0009532 plastid stroma; GO:0009536 plastid; GO:0009570 chloroplast stroma; GO:0009941 chloroplast envelope; GO:0016020 membrane; GO:0031967 organelle envelope; GO:0031974 membrane-enclos…	GO:0003824 catalytic activity; GO:0015930 glutamate synthase activity; GO:0016041 glutamate synthase (ferredoxin) activity; GO:0016491 oxidoreductase activity; GO:0016638 oxidoreductase activity, acting on the CH-NH2 group of donors; GO:0016643 oxidoreductase activity, acting on the CH-NH2 group of donors, iron-sulfur protein as acceptor;	K00284	E1.4.7.1; glutamate synthase (ferredoxin) [EC:1.4.7.1]	cann00630 Glyoxylate and dicarboxylate metabolism; cann00910 Nitrogen metabolism	PF00310; PF04898; PF01645	Glutamine amidotransferases class-II; Glutamate synthase central domain; Conserved region in glutamate synthase
Capana00g005036	193	0.61792	Down	0.034237	K	"GLTB1_ARATH Ferredoxin-dependent glutamate synthase 1, chloroplastic OS=Arabidopsis thaliana GN=GLU1 PE=1 SV=2"	GLU1	1	4.52644e-05	151.22	DCNQMNEAK(1)K	2	-7.2329	22	1.53068	1.44721	1.11583	1.56338	1.3353	1.276		0.81799	0.868403	0.67792	0.680619	0.74124	1.01418			0.598592	0.651767	0.634774	0.616397	0.479561	0.560547				chloroplast	GO:0006082 organic acid metabolic process; GO:0006520 cellular amino acid metabolic process; GO:0006536 glutamate metabolic process; GO:0006537 glutamate biosynthetic process; GO:0006541 glutamine metabolic process; GO:0006807 nitrogen compound metabolic process; GO:0008152 metabolic process; GO:0008652 cellular amino acid biosynthetic process; GO:0009058 biosynthetic process; GO:0009064 glutamin…	GO:0005576 extracellular region; GO:0005622 intracellular; GO:0005623 cell; GO:0005737 cytoplasm; GO:0005739 mitochondrion; GO:0005759 mitochondrial matrix; GO:0009507 chloroplast; GO:0009526 plastid envelope; GO:0009532 plastid stroma; GO:0009536 plastid; GO:0009570 chloroplast stroma; GO:0009941 chloroplast envelope; GO:0016020 membrane; GO:0031967 organelle envelope; GO:0031974 membrane-enclos…	GO:0003824 catalytic activity; GO:0015930 glutamate synthase activity; GO:0016041 glutamate synthase (ferredoxin) activity; GO:0016491 oxidoreductase activity; GO:0016638 oxidoreductase activity, acting on the CH-NH2 group of donors; GO:0016643 oxidoreductase activity, acting on the CH-NH2 group of donors, iron-sulfur protein as acceptor;	K00284	E1.4.7.1; glutamate synthase (ferredoxin) [EC:1.4.7.1]	cann00630 Glyoxylate and dicarboxylate metabolism; cann00910 Nitrogen metabolism	PF00310; PF04898; PF01645	Glutamine amidotransferases class-II; Glutamate synthase central domain; Conserved region in glutamate synthase
Capana01g000293	57	0.368297	Down	0.000139223	K	SELH_MACFA Selenoprotein H OS=Macaca fascicularis GN=SELH PE=2 SV=2	SELH	1	9.7156e-183	250.16	ANSEPVSADPEPEK(1)R	2	-6.0776	36	1.37194	1.23119	1.44405	0.959128	0.829938	0.874564	0.490272	0.544516	0.455774	0.939481	1.10048	0.924477	1.67125	1.46667	1.74131	0.652096	0.932859	0.845659	0.524573	0.473684	0.535789	1.33364	1.29612	1.2436	nucleus
Capana01g000496	390	0.631078	Down	0.006936	K	F10AL_ARATH FAM10 family protein At4g22670 OS=Arabidopsis thaliana GN=At4g22670 PE=1 SV=1	At4g22670	1	7.6292e-108	244.81	NPANLAK(1)HQANPK	2	-0.079346	42	1.52011	1.29881	1.30743	1.19729	1.18253	1.11231	0.920904	0.743922	0.939222	0.870968		1.01277	0.823232	1.03139	1.09456	0.800182	0.774062	0.774818	0.747589	0.876501	0.787479	1.40879	1.39286	1.45161	nucleus	GO:0010035 response to inorganic substance; GO:0010038 response to metal ion; GO:0042221 response to chemical; GO:0046686 response to cadmium ion; GO:0050896 response to stimulus;	GO:0005622 intracellular; GO:0005623 cell; GO:0005737 cytoplasm; GO:0005829 cytosol; GO:0044424 intracellular part; GO:0044444 cytoplasmic part; GO:0044464 cell part;		K09560	ST13; suppressor of tumorigenicity protein 13
Capana01g000509	439	1.71459	Up	0.0042764	K	STIP_SOYBN Heat shock protein STI OS=Glycine max GN=STI PE=2 SV=1	STI	1	1.33208e-42	154.09	AACYTK(1)LAALPEGLK	2	-3.1269	43	0.642292	0.546627	0.565776	1.06567	1.18466	1.05744	0.954904	1.15836	0.895311	1.10387	0.681618	0.639896	1.3673	1.03618		1.54665	1.48655	1.87188	1.31075	0.94707	0.900756	1.00839	0.340245	0.984317	cytoplasm	GO:0006950 response to stress; GO:0006986 response to unfolded protein; GO:0009266 response to temperature stimulus; GO:0009408 response to heat; GO:0009409 response to cold; GO:0009611 response to wounding; GO:0009628 response to abiotic stimulus; GO:0009987 cellular process; GO:0010033 response to organic substance; GO:0016043 cellular component organization; GO:0022607 cellular component assem…		GO:0005488 binding; GO:0005515 protein binding; GO:0031072 heat shock protein binding; GO:0051879 Hsp90 protein binding; GO:0070678 preprotein binding;	K09553	STIP1; stress-induced-phosphoprotein 1
Capana01g000523	258	0.564725	Down	0.00064024	K	TAL_HAES2 Transaldolase OS=Haemophilus somnus (strain 2336) GN=tal PE=3 SV=1	tal	1	2.09917e-07	142.56	AYNYIHK(1)YGHK	2	-6.6289	14		1.28773	1.26157			1.05351	0.727169		0.712486	0.934444					0.996377		0.908905	0.996991	0.95221			0.878704	0.91831	0.83052	chloroplast				K00616	E2.2.1.2, talA, talB; transaldolase [EC:2.2.1.2]	cann00030 Pentose phosphate pathway; cann01100 Metabolic pathways; cann01110 Biosynthesis of secondary metabolites; cann01200 Carbon metabolism; cann01230 Biosynthesis of amino acids	PF00923	Transaldolase
Capana01g000643	66	0.621779	Down	0.039517	K	"DCL_SOLLC Protein DCL, chloroplastic OS=Solanum lycopersicum GN=DCL PE=2 SV=1"	DCL	1	1.76598e-17	126.21	EEENEPENEDATK(1)K	2	-6.5118	22	1.66708	1.36244	1.96418		0.767621	0.796107	1.00143	0.839607	1.26394	0.731905	0.555864	0.77434	1.16921	1.46709	1.09199	1.03409		1.11676	1.3977	0.70827	1.2597	0.350932	0.804648	0.913844	nucleus	GO:0000003 reproduction; GO:0003006 developmental process involved in reproduction; GO:0006996 organelle organization; GO:0006997 nucleus organization; GO:0007000 nucleolus organization; GO:0007275 multicellular organism development; GO:0009790 embryo development; GO:0009791 post-embryonic development; GO:0009793 embryo development ending in seed dormancy; GO:0009987 cellular process; GO:0010154 …	GO:0005622 intracellular; GO:0005623 cell; GO:0005634 nucleus; GO:0043226 organelle; GO:0043227 membrane-bounded organelle; GO:0043229 intracellular organelle; GO:0043231 intracellular membrane-bounded organelle; GO:0044424 intracellular part; GO:0044464 cell part;
Capana01g000893	76	2.41606	Up	0.0023571	K	"KPPR_WHEAT Phosphoribulokinase, chloroplastic OS=Triticum aestivum PE=2 SV=1"	---	1	1.0824e-139	212.69	TVVIGLAADSGCGK(1)STFMR	2	-1.6021	35	0.793103	0.905747	0.627138	1.118	1.16125	1.18246	1.71251	2.15005	1.75716		0.57424	0.675952	1.16387	1.10337	1.09905	0.82131	0.672234	0.755165	0.859935	0.84058		0.688164	0.855118	0.660048	chloroplast	GO:0006139 nucleobase-containing compound metabolic process; GO:0006206 pyrimidine nucleobase metabolic process; GO:0006213 pyrimidine nucleoside metabolic process; GO:0006220 pyrimidine nucleotide metabolic process; GO:0006221 pyrimidine nucleotide biosynthetic process; GO:0006222 UMP biosynthetic process; GO:0006725 cellular aromatic compound metabolic process; GO:0006753 nucleoside phosphate m…	GO:0005576 extracellular region; GO:0005622 intracellular; GO:0005623 cell; GO:0005737 cytoplasm; GO:0005829 cytosol; GO:0009507 chloroplast; GO:0009526 plastid envelope; GO:0009532 plastid stroma; GO:0009534 chloroplast thylakoid; GO:0009535 chloroplast thylakoid membrane; GO:0009536 plastid; GO:0009570 chloroplast stroma; GO:0009579 thylakoid; GO:0009941 chloroplast envelope; GO:0010319 stromul…	GO:0003824 catalytic activity; GO:0004849 uridine kinase activity; GO:0005488 binding; GO:0005515 protein binding; GO:0008974 phosphoribulokinase activity; GO:0016301 kinase activity; GO:0016740 transferase activity; GO:0016772 transferase activity, transferring phosphorus-containing groups; GO:0016773 phosphotransferase activity, alcohol group as acceptor; GO:0019205 nucleobase-containing compou…	K00855	PRK, prkB; phosphoribulokinase [EC:2.7.1.19]	cann00710 Carbon fixation in photosynthetic organisms; cann01100 Metabolic pathways; cann01200 Carbon metabolism	PF00485	Phosphoribulokinase / Uridine kinase family
Capana01g000988	505	0.596634	Down	0.00022465	K	PUR9_LISMF Bifunctional purine biosynthesis protein PurH OS=Listeria monocytogenes serotype 4b (strain F2365) GN=purH PE=3 SV=1	purH	1	1.54208e-05	115.41	HVK(1)SNAIVIAK	2	-6.7689	23	1.28889	1.38421	1.33661	1.47515	1.52637	1.41171	0.851083	0.78769	0.753559	0.780944	0.770965	0.740773	1.15589	1.24195	1.30769	0.846827	0.807074	0.75698	0.789848	0.877572	0.737978	0.749723		0.701008	chloroplast				K00602	purH; phosphoribosylaminoimidazolecarboxamide formyltransferase / IMP cyclohydrolase [EC:2.1.2.3 3.5.4.10]	cann00230 Purine metabolism; cann00670 One carbon pool by folate; cann01100 Metabolic pathways; cann01110 Biosynthesis of secondary metabolites	PF02142	MGS-like domain
Capana01g001041	271	0.591167	Down	0.00112094	K	"CLPP4_ARATH ATP-dependent Clp protease proteolytic subunit 4, chloroplastic OS=Arabidopsis thaliana GN=CLPP4 PE=1 SV=1"	CLPP4	1	1.66733e-42	165.72	VK(1)STLNYQEIMADPK	2	3.563	24	1.28609	1.57143	1.35348	1.26515		1.45745	0.818449	0.812689	0.858268		0.829969	1.03561	1.17896	1.04559	1.12183	0.817486	0.591002	0.707956	0.602397	0.88876		0.928	1.09597	1.00676	chloroplast	GO:0006996 organelle organization; GO:0009657 plastid organization; GO:0009658 chloroplast organization; GO:0009987 cellular process; GO:0016043 cellular component organization; GO:0040034 regulation of development, heterochronic; GO:0048506 regulation of timing of meristematic phase transition; GO:0048509 regulation of meristem development; GO:0048510 regulation of timing of transition from vege…	GO:0005622 intracellular; GO:0005623 cell; GO:0005737 cytoplasm; GO:0009368 endopeptidase Clp complex; GO:0009507 chloroplast; GO:0009526 plastid envelope; GO:0009532 plastid stroma; GO:0009534 chloroplast thylakoid; GO:0009535 chloroplast thylakoid membrane; GO:0009536 plastid; GO:0009570 chloroplast stroma; GO:0009579 thylakoid; GO:0009840 chloroplastic endopeptidase Clp complex; GO:0009941 chl…		K01358	clpP, CLPP; ATP-dependent Clp protease, protease subunit [EC:3.4.21.92]		PF00574	Clp protease
Capana01g001041	217	3.45843	Up	9.8906e-05	K	"CLPP4_ARATH ATP-dependent Clp protease proteolytic subunit 4, chloroplastic OS=Arabidopsis thaliana GN=CLPP4 PE=1 SV=1"	CLPP4	1	3.86954e-28	159.12	DNVTK(1)IFSNCTGR	2	-7.2192	21	0.390728	0.39916	0.436716	0.827922		0.992553		1.41188	1.4162	0.943772	0.567547	1.0328	1.3384	0.919959	1.03553	1.16284	0.960123	1.11883	1.52614	1.09618		0.997091	1.04257	1.06086	chloroplast	GO:0006996 organelle organization; GO:0009657 plastid organization; GO:0009658 chloroplast organization; GO:0009987 cellular process; GO:0016043 cellular component organization; GO:0040034 regulation of development, heterochronic; GO:0048506 regulation of timing of meristematic phase transition; GO:0048509 regulation of meristem development; GO:0048510 regulation of timing of transition from vege…	GO:0005622 intracellular; GO:0005623 cell; GO:0005737 cytoplasm; GO:0009368 endopeptidase Clp complex; GO:0009507 chloroplast; GO:0009526 plastid envelope; GO:0009532 plastid stroma; GO:0009534 chloroplast thylakoid; GO:0009535 chloroplast thylakoid membrane; GO:0009536 plastid; GO:0009570 chloroplast stroma; GO:0009579 thylakoid; GO:0009840 chloroplastic endopeptidase Clp complex; GO:0009941 chl…		K01358	clpP, CLPP; ATP-dependent Clp protease, protease subunit [EC:3.4.21.92]		PF00574	Clp protease
Capana01g001047	83	0.565598	Down	0.048895	K	PYR1_ARATH Abscisic acid receptor PYR1 OS=Arabidopsis thaliana GN=PYR1 PE=1 SV=1	PYR1	1	1.15763e-29	135.5	HFIK(1)SCNVDENFR	2	-2.1254	25	1.15358		1.6006	1.64313	2.08026	1.35627	0.698706	0.939294	0.698644		0.871366	0.893839	1.07464	1.21304		0.668657	0.97619	0.814562	0.619772	0.747881	0.89959			0.352876	cytoplasm	GO:0001101 response to acid chemical; GO:0007154 cell communication; GO:0007165 signal transduction; GO:0009719 response to endogenous stimulus; GO:0009725 response to hormone; GO:0009737 response to abscisic acid; GO:0009738 abscisic acid-activated signaling pathway; GO:0009755 hormone-mediated signaling pathway; GO:0009892 negative regulation of metabolic process; GO:0009987 cellular process; G…	GO:0005622 intracellular; GO:0005623 cell; GO:0005634 nucleus; GO:0005737 cytoplasm; GO:0005829 cytosol; GO:0043226 organelle; GO:0043227 membrane-bounded organelle; GO:0043229 intracellular organelle; GO:0043231 intracellular membrane-bounded organelle; GO:0044424 intracellular part; GO:0044444 cytoplasmic part; GO:0044464 cell part;	GO:0004857 enzyme inhibitor activity; GO:0004864 protein phosphatase inhibitor activity; GO:0005488 binding; GO:0005515 protein binding; GO:0008289 lipid binding; GO:0010427 abscisic acid binding; GO:0019208 phosphatase regulator activity; GO:0019212 phosphatase inhibitor activity; GO:0019840 isoprenoid binding; GO:0019888 protein phosphatase regulator activity; GO:0030234 enzyme regulator activi…	K14496	PYL; abscisic acid receptor PYR/PYL family	cann04016 MAPK signaling pathway - plant; cann04075 Plant hormone signal transduction
Capana01g001049	331	0.396863	Down	0.000180817	K	ARGE_DICDI Acetylornithine deacetylase OS=Dictyostelium discoideum GN=argE PE=1 SV=2	argE	1	1.65429e-08	128.57	GPVSK(1)YVLPDENLR	2	-2.0759	17	1.21072	1.39074	1.44356	1.42938	0.905405	1.0697	0.489447	0.555224	0.560652	0.354916	0.59904		1.50388	1.4466	1.4767		0.824742	0.836695	0.498436						cytoplasm				K01438	argE; acetylornithine deacetylase [EC:3.5.1.16]	cann00220 Arginine biosynthesis; cann01100 Metabolic pathways; cann01110 Biosynthesis of secondary metabolites; cann01210 2-Oxocarboxylic acid metabolism; cann01230 Biosynthesis of amino acids	PF07687	Peptidase dimerisation domain
Capana01g002007	129	0.526533	Down	0.00078145	K	"CP20B_ARATH Peptidyl-prolyl cis-trans isomerase CYP20-2, chloroplastic OS=Arabidopsis thaliana GN=CYP20-2 PE=1 SV=1"	CYP20-2	1	2.77136e-08	143.39	GFGFK(1)DSAFHR	2	-3.4217	26	1.74395	1.4717	1.41184	1.4119	1.42936	1.30117	0.837668	0.771532	0.827324	0.8672	0.876946	0.922819	1.15327	1.34397	1.11777	1.25283	1.18146	1.08602	1.05068	1.01841	0.04375	0.716969	0.749517	0.786954	chloroplast	GO:0000413 protein peptidyl-prolyl isomerization; GO:0006464 cellular protein modification process; GO:0006807 nitrogen compound metabolic process; GO:0008152 metabolic process; GO:0009987 cellular process; GO:0010275 NAD(P)H dehydrogenase complex assembly; GO:0016043 cellular component organization; GO:0018193 peptidyl-amino acid modification; GO:0018208 peptidyl-proline modification; GO:0019538…	GO:0005622 intracellular; GO:0005623 cell; GO:0005737 cytoplasm; GO:0009507 chloroplast; GO:0009532 plastid stroma; GO:0009533 chloroplast stromal thylakoid; GO:0009534 chloroplast thylakoid; GO:0009535 chloroplast thylakoid membrane; GO:0009536 plastid; GO:0009570 chloroplast stroma; GO:0009579 thylakoid; GO:0016020 membrane; GO:0031976 plastid thylakoid; GO:0031977 thylakoid lumen; GO:0031984 o…	GO:0003755 peptidyl-prolyl cis-trans isomerase activity; GO:0003824 catalytic activity; GO:0005488 binding; GO:0005515 protein binding; GO:0016853 isomerase activity; GO:0016859 cis-trans isomerase activity; GO:0019899 enzyme binding; GO:0019900 kinase binding; GO:0019901 protein kinase binding; GO:0043424 protein histidine kinase binding;	K03768	PPIB, ppiB; peptidyl-prolyl cis-trans isomerase B (cyclophilin B) [EC:5.2.1.8]		PF00160	Cyclophilin type peptidyl-prolyl cis-trans isomerase/CLD
Capana01g002320	288	0.643441	Down	0.024098	K	ACLB1_ORYSJ ATP-citrate synthase beta chain protein 1 OS=Oryza sativa subsp. japonica GN=ACLB-1 PE=2 SV=1	ACLB-1	1	1.28607e-96	216.04	SGGEMESAQAK(1)NQALR	2	-6.7544	21	1.10478	1.33821	1.20565	1.25335	1.33049	1.34109	0.702674		0.862445	0.606918	0.86859	0.912951	1.26226	1.22	1.41484	0.83822	1.04331	0.725049	0.930736	0.712581		0.574199	0.670973		chloroplast	GO:0006084 acetyl-CoA metabolic process; GO:0006085 acetyl-CoA biosynthetic process; GO:0006139 nucleobase-containing compound metabolic process; GO:0006163 purine nucleotide metabolic process; GO:0006164 purine nucleotide biosynthetic process; GO:0006637 acyl-CoA metabolic process; GO:0006725 cellular aromatic compound metabolic process; GO:0006732 coenzyme metabolic process; GO:0006753 nucleosi…	GO:0005622 intracellular; GO:0005623 cell; GO:0005737 cytoplasm; GO:0005829 cytosol; GO:0005886 plasma membrane; GO:0009346 citrate lyase complex; GO:0016020 membrane; GO:0032991 macromolecular complex; GO:0044424 intracellular part; GO:0044444 cytoplasmic part; GO:0044464 cell part; GO:0071944 cell periphery;	GO:0003824 catalytic activity; GO:0003878 ATP citrate synthase activity; GO:0016740 transferase activity; GO:0016746 transferase activity, transferring acyl groups; GO:0046912 transferase activity, transferring acyl groups, acyl groups converted into alkyl on transfer;	K01648	ACLY; ATP citrate (pro-S)-lyase [EC:2.3.3.8]	cann00020 Citrate cycle (TCA cycle); cann01100 Metabolic pathways; cann01110 Biosynthesis of secondary metabolites	PF00549; PF00285	CoA-ligase; Citrate synthase
Capana01g002397	59	0.57476	Down	0.0152801	K	"RR1_SPIOL 30S ribosomal protein S1, chloroplastic OS=Spinacia oleracea GN=RPS1 PE=1 SV=1"	RPS1	1	8.92089e-05	81.799	LK(1)EIFEDAYER	2	-9.6018	20	0.978698	1.43795	1.05043	1.28164	1.62907	1.42857	0.647635	0.743766	0.601334	0.935931	0.808326	0.978705	1.34751	0.892638		1.09888		0.985714	0.863677		0.874036	0.862983	1.04148		chloroplast	GO:0009719 response to endogenous stimulus; GO:0009725 response to hormone; GO:0009735 response to cytokinin; GO:0010033 response to organic substance; GO:0042221 response to chemical; GO:0050896 response to stimulus;	GO:0005622 intracellular; GO:0005623 cell; GO:0005737 cytoplasm; GO:0009507 chloroplast; GO:0009532 plastid stroma; GO:0009536 plastid; GO:0009570 chloroplast stroma; GO:0009579 thylakoid; GO:0016020 membrane; GO:0043226 organelle; GO:0043227 membrane-bounded organelle; GO:0043229 intracellular organelle; GO:0043231 intracellular membrane-bounded organelle; GO:0044422 organelle part; GO:0044424 i…	GO:0003676 nucleic acid binding; GO:0003723 RNA binding; GO:0003729 mRNA binding; GO:0005488 binding; GO:0097159 organic cyclic compound binding; GO:1901363 heterocyclic compound binding;	K02945	RP-S1, rpsA; small subunit ribosomal protein S1	cann03010 Ribosome	PF00575	S1 RNA binding domain
Capana01g002398	229	2.36069	Up	0.000120214	K	"CB5_ARATH Chlorophyll a-b binding protein CP26, chloroplastic OS=Arabidopsis thaliana GN=LHCB5 PE=2 SV=1"	LHCB5	1	1.65299e-07	151.22	DPDQAAILK(1)VK	2	-7.5323	23	0.489496	0.454245	0.486239	0.69863	0.526596	1.13318	1.03937	1.09529	1.24108		0.936299	1.0375	1.47185	0.949772	0.844609	1.31393	0.678751	1.02799	0.947964	0.860441	0.40221	1.28896	1.49231	1.64911	chloroplast				K08916	LHCB5; light-harvesting complex II chlorophyll a/b binding protein 5	cann00196 Photosynthesis - antenna proteins; cann01100 Metabolic pathways
Capana01g002411	133	0.641749	Down	0.020601	K	RL7A2_ARATH 60S ribosomal protein L7a-2 OS=Arabidopsis thaliana GN=RPL7AB PE=1 SV=1	RPL7AB	1	2.607e-133	236.34	YGLK(1)HITYLIEQNK	2	-5.89	31	0.919715	1.10105	1.18382	0.960707	1.30281			0.674897	0.696128	0.813347	1.01044	1.10768	1.18708		1.31771	0.76152	0.84135	0.942192	0.968195		1.00212	1.94932	1.94225	1.90221	cytoplasm				K02936	RP-L7Ae, RPL7A; large subunit ribosomal protein L7Ae	cann03010 Ribosome	PF01248	Ribosomal protein L7Ae/L30e/S12e/Gadd45 family
Capana01g002599	157	0.66626	Down	0.03436	K	"ATPO_IPOBA ATP synthase subunit O, mitochondrial OS=Ipomoea batatas PE=1 SV=1"	---	1	3.45054e-06	128.57	FAELTMAHK(1)GELK	2	-4.8495	24	1.59891	1.10562	1.12164	1.26081	1.11222	1.10118	0.851524	0.805444	0.892259	0.788841	0.866781	0.806452	1.03136	0.841477	0.971678	1.19756	0.9625	0.864425	0.996994	1.14887	1.11111	0.971924	1.03824	1.06043	chloroplast		GO:0005622 intracellular; GO:0005623 cell; GO:0005737 cytoplasm; GO:0005739 mitochondrion; GO:0005740 mitochondrial envelope; GO:0005743 mitochondrial inner membrane; GO:0005753 mitochondrial proton-transporting ATP synthase complex; GO:0005886 plasma membrane; GO:0009507 chloroplast; GO:0009536 plastid; GO:0016020 membrane; GO:0016469 proton-transporting two-sector ATPase complex; GO:0019866 org…	GO:0005488 binding; GO:0008270 zinc ion binding; GO:0043167 ion binding; GO:0043169 cation binding; GO:0046872 metal ion binding; GO:0046914 transition metal ion binding; GO:0050897 cobalt ion binding;	K02137	ATPeF0O, ATP5O, ATP5; F-type H+-transporting ATPase subunit O	cann00190 Oxidative phosphorylation; cann01100 Metabolic pathways
Capana01g002678	317	0.541376	Down	0.048644	K	"RK1_ARATH 50S ribosomal protein L1, chloroplastic OS=Arabidopsis thaliana GN=RPL1 PE=1 SV=1"	RPL1	1	3.07761e-41	175.43	GVYWK(1)SAHVCSSMGPSIR	2	-2.2383	32	0.929577	1.4763	1.64733	1.59483	1.45367	1.59471	0.915779	0.610883	0.667647	0.579545	1.01222		1.32086	1.65826	1.66705	0.973653	1.0464	0.98227	0.735206		0.802844	0.515152	0.610793	0.39954	chloroplast	GO:0000470 maturation of LSU-rRNA; GO:0006139 nucleobase-containing compound metabolic process; GO:0006364 rRNA processing; GO:0006396 RNA processing; GO:0006412 translation; GO:0006518 peptide metabolic process; GO:0006725 cellular aromatic compound metabolic process; GO:0006807 nitrogen compound metabolic process; GO:0008152 metabolic process; GO:0009058 biosynthetic process; GO:0009059 macromo…	GO:0005622 intracellular; GO:0005623 cell; GO:0005634 nucleus; GO:0005737 cytoplasm; GO:0005829 cytosol; GO:0005840 ribosome; GO:0009507 chloroplast; GO:0009526 plastid envelope; GO:0009532 plastid stroma; GO:0009534 chloroplast thylakoid; GO:0009535 chloroplast thylakoid membrane; GO:0009536 plastid; GO:0009570 chloroplast stroma; GO:0009579 thylakoid; GO:0009941 chloroplast envelope; GO:0015934…	GO:0003676 nucleic acid binding; GO:0003723 RNA binding; GO:0005488 binding; GO:0097159 organic cyclic compound binding; GO:1901363 heterocyclic compound binding;	K02863	RP-L1, MRPL1, rplA; large subunit ribosomal protein L1	cann03010 Ribosome	PF00687	Ribosomal protein L1p/L10e family
Capana01g002878	149	0.600541	Down	0.00059853	K	"CGEP_ORYSJ Probable glutamyl endopeptidase, chloroplastic OS=Oryza sativa subsp. japonica GN=GEP PE=2 SV=1"	GEP	1	1.05643e-27	162.21	WLQK(1)HCVYSSDVK	2	6.2757	45	1.34258	1.38627	1.58276	1.50721	1.51373	1.32126	0.880443	0.847949	0.860911	0.802064	1.01834	0.83679	0.800384	1.07812	1.00554	0.921758	1.01039	1.05215	0.739694	0.818291	0.746822	0.335227	0.280781	0.312689	cytoplasm		GO:0005622 intracellular; GO:0005623 cell; GO:0005737 cytoplasm; GO:0009507 chloroplast; GO:0009532 plastid stroma; GO:0009536 plastid; GO:0009570 chloroplast stroma; GO:0043226 organelle; GO:0043227 membrane-bounded organelle; GO:0043229 intracellular organelle; GO:0043231 intracellular membrane-bounded organelle; GO:0044422 organelle part; GO:0044424 intracellular part; GO:0044434 chloroplast p…					PF00326	Prolyl oligopeptidase family
Capana01g003067	362	0.56143	Down	0.00051972	K	"PPDK_MESCR Pyruvate, phosphate dikinase, chloroplastic OS=Mesembryanthemum crystallinum GN=PPD PE=2 SV=1"	PPD	1	7.53982e-47	192.95	ELVENCEILEK(1)HYK	2	5.2553	20	1.27164	1.25616	1.46752	1.50633	1.5933	1.53532	0.785446	0.718773	0.738868			0.614416	1.13927	1.44805	1.25188	0.648286	0.641263	0.770656	0.701045	0.697378	0.763728				chloroplast		GO:0005622 intracellular; GO:0005623 cell; GO:0005634 nucleus; GO:0005737 cytoplasm; GO:0005829 cytosol; GO:0009507 chloroplast; GO:0009532 plastid stroma; GO:0009536 plastid; GO:0009570 chloroplast stroma; GO:0043226 organelle; GO:0043227 membrane-bounded organelle; GO:0043229 intracellular organelle; GO:0043231 intracellular membrane-bounded organelle; GO:0044422 organelle part; GO:0044424 intr…		K01006	ppdK; pyruvate, orthophosphate dikinase [EC:2.7.9.1]	cann00620 Pyruvate metabolism; cann00710 Carbon fixation in photosynthetic organisms; cann01100 Metabolic pathways; cann01200 Carbon metabolism	PF02896	PEP-utilising enzyme, TIM barrel domain
Capana01g003799	46	0.633383	Down	0.0191399	K	EIF2A_CHICK Eukaryotic translation initiation factor 2A OS=Gallus gallus GN=EIF2A PE=2 SV=1	EIF2A	1	1.04437e-12	130.99	VPCTSAK(1)FSDDGSK	2	-6.6528	18		1.3971	1.23	1.599	1.4428	1.34956	0.886983	0.723358	0.885602		0.801724	0.619107	1.38197	1.14197	1.30095	0.63327		0.939061	0.734317			0.428571	0.247974		nucleus				K15026	EIF2A; translation initiation factor 2A
Capana01g004297	316	2.03822	Up	0.00177716	K	CMT2_ARATH DNA (cytosine-5)-methyltransferase CMT2 OS=Arabidopsis thaliana GN=CMT2 PE=2 SV=3	CMT2	1	1.36756e-17	140.01	ISSESNSVGGK(1)SLR	2	-6.7264	18	0.683099		0.787339	0.609252		0.556492	1.47382	1.59178	1.43001			1.41441	0.711027			0.597674	0.702885	0.637051	1.02395	0.944217	1.02256				nucleus	GO:0006139 nucleobase-containing compound metabolic process; GO:0006259 DNA metabolic process; GO:0006304 DNA modification; GO:0006305 DNA alkylation; GO:0006306 DNA methylation; GO:0006725 cellular aromatic compound metabolic process; GO:0006807 nitrogen compound metabolic process; GO:0006950 response to stress; GO:0008152 metabolic process; GO:0009266 response to temperature stimulus; GO:000940…		GO:0003824 catalytic activity; GO:0003886 DNA (cytosine-5-)-methyltransferase activity; GO:0008168 methyltransferase activity; GO:0008757 S-adenosylmethionine-dependent methyltransferase activity; GO:0009008 DNA-methyltransferase activity; GO:0016740 transferase activity; GO:0016741 transferase activity, transferring one-carbon groups;	K00558	DNMT1, dcm; DNA (cytosine-5)-methyltransferase 1 [EC:2.1.1.37]	cann00270 Cysteine and methionine metabolism; cann01100 Metabolic pathways	PF01426; PF00385; PF00145	BAH domain; Chromo (CHRromatin Organisation MOdifier) domain; C-5 cytosine-specific DNA methylase
Capana01g004493	155	0.642152	Down	0.0076157	K	"PSAN_ARATH Photosystem I reaction center subunit N, chloroplastic OS=Arabidopsis thaliana GN=PSAN PE=1 SV=2"	PSAN	0.997393	2.0026e-140	218.58	VPFLSDDLDLECEGK(0.003)DK(0.997)YK	3	-6.5316	45	1.75984	1.95578	1.48583	1.92152	1.89291	1.75197	1.09148	1.19308	1.05556	0.871649	0.80249	0.890999	1.28902	1.35682	1.31591	0.624169	0.683685	0.605996	0.714681	0.71258	0.612589	0.478873		0.452064	chloroplast			GO:0005488 binding; GO:0005515 protein binding; GO:0019904 protein domain specific binding;	K02701	psaN; photosystem I subunit PsaN	cann00195 Photosynthesis
Capana01g004493	157	0.650964	Down	0.003337	K	"PSAN_ARATH Photosystem I reaction center subunit N, chloroplastic OS=Arabidopsis thaliana GN=PSAN PE=1 SV=2"	PSAN	1	1.31462e-33	200.76	YK(1)CGSNVFWK	2	-4.719	47	1.43963	1.56776	1.31984	1.45738	1.60241	1.33727	0.996845	0.853795	0.966231	0.87896	0.942739	0.874484	1.15722	1.18068	1.21487	0.797118	0.839068	0.815846	0.734995	0.803489	0.674645	0.873239	0.867333	0.865513	chloroplast			GO:0005488 binding; GO:0005515 protein binding; GO:0019904 protein domain specific binding;	K02701	psaN; photosystem I subunit PsaN	cann00195 Photosynthesis
Capana02g000024	636	1.68855	Up	0.0026557	K	"CGEP_ARATH Probable glutamyl endopeptidase, chloroplastic OS=Arabidopsis thaliana GN=GEP PE=2 SV=2"	GEP	1	2.5946e-230	277.21	TENTQYNLLSWPEK(1)K	2	5.1066	37	0.593939	0.643993	0.753541	1.36775	0.914258	1.24412	1.18797	1.13022	1.04452	1.11101	0.600575	0.622749	1.91167	1.06197	1.22199	1.15894	1.13894	0.985236	0.882474	1.01151	0.904321	0.85208	0.803077	0.766154	chloroplast		GO:0005622 intracellular; GO:0005623 cell; GO:0005737 cytoplasm; GO:0009507 chloroplast; GO:0009532 plastid stroma; GO:0009536 plastid; GO:0009570 chloroplast stroma; GO:0043226 organelle; GO:0043227 membrane-bounded organelle; GO:0043229 intracellular organelle; GO:0043231 intracellular membrane-bounded organelle; GO:0044422 organelle part; GO:0044424 intracellular part; GO:0044434 chloroplast p…
Capana02g000067	397	1.66274	Up	0.042024	K	"TKTC_SOLTU Transketolase, chloroplastic OS=Solanum tuberosum PE=2 SV=1"	---	1	0.00074585	99.34	K(1)YPEEAADLK	2	-7.4877	23	0.5607	0.818376	0.673216	0.593023	1.0561	1.11851	1.15067	1.15691	1.10484	1.14244	0.758955	1.15825	1.4344	1.16879	1.10043	1.1288		0.913618	0.985761	0.439362	0.878338	1.01304	1.28953	1.26231	chloroplast		GO:0005622 intracellular; GO:0005623 cell; GO:0005737 cytoplasm; GO:0009507 chloroplast; GO:0009534 chloroplast thylakoid; GO:0009535 chloroplast thylakoid membrane; GO:0009536 plastid; GO:0009579 thylakoid; GO:0016020 membrane; GO:0031976 plastid thylakoid; GO:0031984 organelle subcompartment; GO:0034357 photosynthetic membrane; GO:0042651 thylakoid membrane; GO:0043226 organelle; GO:0043227 mem…	GO:0003824 catalytic activity; GO:0004802 transketolase activity; GO:0016740 transferase activity; GO:0016744 transferase activity, transferring aldehyde or ketonic groups;	K00615	E2.2.1.1, tktA, tktB; transketolase [EC:2.2.1.1]	cann00030 Pentose phosphate pathway; cann00710 Carbon fixation in photosynthetic organisms; cann01100 Metabolic pathways; cann01110 Biosynthesis of secondary metabolites; cann01200 Carbon metabolism; cann01230 Biosynthesis of amino acids	PF00456	Transketolase, thiamine diphosphate binding domain
Capana02g000489	337	0.634474	Down	0.0095557	K	"ALFC2_ARATH Probable fructose-bisphosphate aldolase 2, chloroplastic OS=Arabidopsis thaliana GN=FBA2 PE=1 SV=2"	FBA2	1	0	295.61	ASANSLAQLGK(1)YTGEGESEEAK	2	5.5104	116	1.08229	1.25	1.33918	1.07074	1.47189	1.03567	0.89126	0.746809	0.691383	0.796593	1.04733	1.04634	1.13439	1.47743	1.25646	1.11226	0.98174	1.00223	0.803991	0.932522	0.702991	0.822473	0.838688	0.780802	chloroplast				K01623	ALDO; fructose-bisphosphate aldolase, class I [EC:4.1.2.13]	cann00010 Glycolysis / Gluconeogenesis; cann00030 Pentose phosphate pathway; cann00051 Fructose and mannose metabolism; cann00710 Carbon fixation in photosynthetic organisms; cann01100 Metabolic pathways; cann01110 Biosynthesis of secondary metabolites; cann01200 Carbon metabolism; cann01230 Biosynthesis of amino acids	PF00274	Fructose-bisphosphate aldolase class-I
Capana02g000541	149	1.75594	Up	0.025775	K	"RBS_CAPAN Ribulose bisphosphate carboxylase small chain, chloroplastic OS=Capsicum annuum GN=RBCS PE=2 SV=1"	RBCS	1	0.00384939	101.41	K(1)AYPQAWIR	2	-7.0193	23	0.642785	0.483193	0.600412	0.81336	0.820896	0.876712	0.758852	1.13429	1.1383	1.02973	0.662021	1.17944	1.27449	0.930857	0.966169	1.19386	1.0878	1.06845	1.1867	0.842926		1.39745	1.30909	1.3319	chloroplast		GO:0005622 intracellular; GO:0005623 cell; GO:0005737 cytoplasm; GO:0009507 chloroplast; GO:0009536 plastid; GO:0043226 organelle; GO:0043227 membrane-bounded organelle; GO:0043229 intracellular organelle; GO:0043231 intracellular membrane-bounded organelle; GO:0044424 intracellular part; GO:0044444 cytoplasmic part; GO:0044464 cell part;		K01602	rbcS; ribulose-bisphosphate carboxylase small chain [EC:4.1.1.39]	cann00630 Glyoxylate and dicarboxylate metabolism; cann00710 Carbon fixation in photosynthetic organisms; cann01100 Metabolic pathways; cann01110 Biosynthesis of secondary metabolites; cann01200 Carbon metabolism	PF00101	Ribulose bisphosphate carboxylase, small chain
Capana02g000667	76	0.582361	Down	0.0116194	K	RL261_ARATH 60S ribosomal protein L26-1 OS=Arabidopsis thaliana GN=RPL26A PE=2 SV=2	RPL26A	1	2.91557e-05	133.98	K(1)WVIHIER	2	-6.5396	27	1.13476	0.966255	1.22299	1.20403	1.35269	1.08026	0.520325	0.707366	0.708081	0.872292	0.97599	0.844086	1.08969	1.22731	1.18698	0.96069	1.02908	0.932803	0.788705	0.796135	0.811565	1.11205	1.27725	1.26454	cytoplasm	GO:0002181 cytoplasmic translation; GO:0006412 translation; GO:0006518 peptide metabolic process; GO:0006807 nitrogen compound metabolic process; GO:0006950 response to stress; GO:0008152 metabolic process; GO:0009058 biosynthetic process; GO:0009059 macromolecule biosynthetic process; GO:0009266 response to temperature stimulus; GO:0009409 response to cold; GO:0009628 response to abiotic stimulu…	GO:0005622 intracellular; GO:0005623 cell; GO:0005634 nucleus; GO:0005730 nucleolus; GO:0005737 cytoplasm; GO:0005773 vacuole; GO:0005774 vacuolar membrane; GO:0005829 cytosol; GO:0005840 ribosome; GO:0005844 polysome; GO:0005886 plasma membrane; GO:0009507 chloroplast; GO:0009536 plastid; GO:0015934 large ribosomal subunit; GO:0016020 membrane; GO:0022625 cytosolic large ribosomal subunit; GO:00…	GO:0003676 nucleic acid binding; GO:0003723 RNA binding; GO:0003729 mRNA binding; GO:0003735 structural constituent of ribosome; GO:0005198 structural molecule activity; GO:0005488 binding; GO:0097159 organic cyclic compound binding; GO:1901363 heterocyclic compound binding;	K02898	RP-L26e, RPL26; large subunit ribosomal protein L26e	cann03010 Ribosome
Capana02g000690	443	0.643629	Down	4.0804e-05	K	Putative ovule protein (Fragment)	---	1	1.20419e-12	151.66	NPDECEAFFLK(1)K	2	-5.6932	22	1.29186	1.37914	1.3645	1.68148	1.69881	1.65162	0.875817	0.848185	0.873362	0.879845	0.791922	0.817728	1.3699	1.25	1.18532		0.982008	0.909427	0.796214	0.82835	0.789364	0.503259		0.534341	chloroplast
Capana02g000764	124	2.21112	Up	0.00053934	K	"PSBO_SOLLC Oxygen-evolving enhancer protein 1, chloroplastic OS=Solanum lycopersicum GN=PSBO PE=2 SV=2"	PSBO	1	2.199e-111	188.68	GTGTANQCPTIEGGVDSFAFK(1)PGK(1)YTAQK	3	1.7789	15	0.920657	0.821608	0.739401				1.93626	1.88659	1.66441	1.01401									0.142157			0.122688			chloroplast		GO:0005622 intracellular; GO:0005623 cell; GO:0005737 cytoplasm; GO:0009507 chloroplast; GO:0009534 chloroplast thylakoid; GO:0009535 chloroplast thylakoid membrane; GO:0009536 plastid; GO:0009579 thylakoid; GO:0016020 membrane; GO:0031976 plastid thylakoid; GO:0031984 organelle subcompartment; GO:0034357 photosynthetic membrane; GO:0042651 thylakoid membrane; GO:0043226 organelle; GO:0043227 mem…		K02716	psbO; photosystem II oxygen-evolving enhancer protein 1	cann00195 Photosynthesis
Capana02g000764	273	0.357114	Down	0.00133594	K	"PSBO_SOLLC Oxygen-evolving enhancer protein 1, chloroplastic OS=Solanum lycopersicum GN=PSBO PE=2 SV=2"	PSBO	1	0	289.22	ENVK(1)NTASSTGK	2	-6.0321	72	1.21614	0.896985	0.900249	0.81994	0.880597	0.612903	0.314741	0.413215	0.348162	1.00088	1.09378	0.868678	1.0304	1.50575	1.2751	0.783816	0.997685	1.1236	1.03333	1.59855	0.926587	1.26017	1.21544	1.35214	chloroplast		GO:0005622 intracellular; GO:0005623 cell; GO:0005737 cytoplasm; GO:0009507 chloroplast; GO:0009534 chloroplast thylakoid; GO:0009535 chloroplast thylakoid membrane; GO:0009536 plastid; GO:0009579 thylakoid; GO:0016020 membrane; GO:0031976 plastid thylakoid; GO:0031984 organelle subcompartment; GO:0034357 photosynthetic membrane; GO:0042651 thylakoid membrane; GO:0043226 organelle; GO:0043227 mem…		K02716	psbO; photosystem II oxygen-evolving enhancer protein 1	cann00195 Photosynthesis
Capana02g000764	97	0.621969	Down	0.033416	K	"PSBO_SOLLC Oxygen-evolving enhancer protein 1, chloroplastic OS=Solanum lycopersicum GN=PSBO PE=2 SV=2"	PSBO	1	4.59708e-43	199.51	LTFDEIQSK(1)TYMEVK	2	-0.98433	42	1.79207		1.3616	1.80952	1.59159	1.61419	0.913347	1.0927	0.93617	0.822242	0.882559	0.893523	1.17296	0.988506	0.993724	0.933575	0.615741	0.634831	0.819608		0.673611	0.727497	0.762416	0.881033	chloroplast		GO:0005622 intracellular; GO:0005623 cell; GO:0005737 cytoplasm; GO:0009507 chloroplast; GO:0009534 chloroplast thylakoid; GO:0009535 chloroplast thylakoid membrane; GO:0009536 plastid; GO:0009579 thylakoid; GO:0016020 membrane; GO:0031976 plastid thylakoid; GO:0031984 organelle subcompartment; GO:0034357 photosynthetic membrane; GO:0042651 thylakoid membrane; GO:0043226 organelle; GO:0043227 mem…		K02716	psbO; photosystem II oxygen-evolving enhancer protein 1	cann00195 Photosynthesis
Capana02g000862	142	0.621312	Down	0.026779	K	CYF_ATRBE Apocytochrome f OS=Atropa belladonna GN=petA PE=3 SV=1	petA	1	2.46442e-61	162.21	IGNLSFQSYRPNK(1)K	2	-2.9395	25		1.07047	0.952555		0.924612	0.727371	0.662313		0.59462	0.797841	1.12435	0.862245	0.84248	1.04505	0.977046			0.594705	0.829189	1.26765	1.2152	1.19129	1.28405	1.27371	nucleus	GO:0006091 generation of precursor metabolites and energy; GO:0008152 metabolic process; GO:0009767 photosynthetic electron transport chain; GO:0009987 cellular process; GO:0015979 photosynthesis; GO:0019684 photosynthesis, light reaction; GO:0022900 electron transport chain; GO:0044237 cellular metabolic process; GO:0055114 oxidation-reduction process;	GO:0005622 intracellular; GO:0005623 cell; GO:0005737 cytoplasm; GO:0009507 chloroplast; GO:0009512 cytochrome b6f complex; GO:0009534 chloroplast thylakoid; GO:0009535 chloroplast thylakoid membrane; GO:0009536 plastid; GO:0009579 thylakoid; GO:0016020 membrane; GO:0031976 plastid thylakoid; GO:0031984 organelle subcompartment; GO:0032991 macromolecular complex; GO:0034357 photosynthetic membran…		K02634	petA; apocytochrome f	cann00195 Photosynthesis; cann01100 Metabolic pathways	PF01333	Apocytochrome F, C-terminal
Capana02g000862	178	0.593523	Down	0.0048156	K	CYF_ATRBE Apocytochrome f OS=Atropa belladonna GN=petA PE=3 SV=1	petA	1	1.01803e-72	204.34	DVHFLK(1)YPIYVGGNR	2	8.8779	57	0.949106	1.13852	1.06813	1.35348	1.0776	0.927802	0.535448	0.688213	0.649351	0.736997	0.827979	0.582653	0.921748	1	1.04391	1.52974	1.40856	1.32485	1.24	1.03372	0.941113	1.04854	1.08886	1.04924	nucleus	GO:0006091 generation of precursor metabolites and energy; GO:0008152 metabolic process; GO:0009767 photosynthetic electron transport chain; GO:0009987 cellular process; GO:0015979 photosynthesis; GO:0019684 photosynthesis, light reaction; GO:0022900 electron transport chain; GO:0044237 cellular metabolic process; GO:0055114 oxidation-reduction process;	GO:0005622 intracellular; GO:0005623 cell; GO:0005737 cytoplasm; GO:0009507 chloroplast; GO:0009512 cytochrome b6f complex; GO:0009534 chloroplast thylakoid; GO:0009535 chloroplast thylakoid membrane; GO:0009536 plastid; GO:0009579 thylakoid; GO:0016020 membrane; GO:0031976 plastid thylakoid; GO:0031984 organelle subcompartment; GO:0032991 macromolecular complex; GO:0034357 photosynthetic membran…		K02634	petA; apocytochrome f	cann00195 Photosynthesis; cann01100 Metabolic pathways	PF01333	Apocytochrome F, C-terminal
Capana02g001694	331	0.59033	Down	0.044258	K	DRKD_DICDI Probable serine/threonine-protein kinase drkD OS=Dictyostelium discoideum GN=drkD PE=2 SV=1	drkD	1	9.83668e-05	103.76	YVAPEVFK(1)NEEYDTK	2	5.0432	28	1.65774	1.22502	1.757	1.21423	1.38366	1.13915		0.981661	0.844332	0.875316	1.5118	0.169935	0.937843		0.965284		0.716032	1.38752	1.46423	0.949353	0.669368	0.402797	0.587196	0.427015	cytoplasm	GO:0006464 cellular protein modification process; GO:0006468 protein phosphorylation; GO:0006793 phosphorus metabolic process; GO:0006796 phosphate-containing compound metabolic process; GO:0006807 nitrogen compound metabolic process; GO:0007154 cell communication; GO:0007165 signal transduction; GO:0008152 metabolic process; GO:0009987 cellular process; GO:0016310 phosphorylation; GO:0019538 pro…	GO:0005622 intracellular; GO:0005623 cell; GO:0005737 cytoplasm; GO:0044424 intracellular part; GO:0044464 cell part;	GO:0003824 catalytic activity; GO:0004672 protein kinase activity; GO:0016301 kinase activity; GO:0016740 transferase activity; GO:0016772 transferase activity, transferring phosphorus-containing groups; GO:0016773 phosphotransferase activity, alcohol group as acceptor;				PF07714	Protein tyrosine kinase
Capana02g001944	431	1.55407	Up	0.0095026	K	EIF3D_ARATH Eukaryotic translation initiation factor 3 subunit D OS=Arabidopsis thaliana GN=TIF3D1 PE=1 SV=1	TIF3D1	1	7.85516e-07	123.42	GAVLATELK(1)NNANK	2	1.0731	22	0.601529	0.808099	0.784	0.945455	0.837278	0.960251	1.09842	1.18077	1.12987	1.06022	0.885129	1.21043	1.03267	0.820152	0.858434	1.01486	1.07164	1.04331	1.19358	0.904966	0.881579			0.857143	cytoplasm	GO:0006412 translation; GO:0006413 translational initiation; GO:0006464 cellular protein modification process; GO:0006470 protein dephosphorylation; GO:0006518 peptide metabolic process; GO:0006793 phosphorus metabolic process; GO:0006796 phosphate-containing compound metabolic process; GO:0006807 nitrogen compound metabolic process; GO:0006810 transport; GO:0006913 nucleocytoplasmic transport; G…	GO:0005622 intracellular; GO:0005623 cell; GO:0005634 nucleus; GO:0005635 nuclear envelope; GO:0005654 nucleoplasm; GO:0005737 cytoplasm; GO:0005783 endoplasmic reticulum; GO:0005789 endoplasmic reticulum membrane; GO:0005829 cytosol; GO:0005852 eukaryotic translation initiation factor 3 complex; GO:0005911 cell-cell junction; GO:0009506 plasmodesma; GO:0012505 endomembrane system; GO:0016020 mem…	GO:0003676 nucleic acid binding; GO:0003723 RNA binding; GO:0003743 translation initiation factor activity; GO:0003824 catalytic activity; GO:0004721 phosphoprotein phosphatase activity; GO:0004722 protein serine/threonine phosphatase activity; GO:0005488 binding; GO:0008135 translation factor activity, RNA binding; GO:0016787 hydrolase activity; GO:0016788 hydrolase activity, acting on ester bon…	K03251	EIF3D; translation initiation factor 3 subunit D	cann03013 RNA transport
Capana02g002133	204	1.64623	Up	0.0068837	K	"PSBQ2_ARATH Oxygen-evolving enhancer protein 3-2, chloroplastic OS=Arabidopsis thaliana GN=PSBQ2 PE=1 SV=2"	PSBQ2	1	3.92721e-34	219.89	TISDLDHAAK(1)TK	2	-3.2939	24	0.765705	0.643388	0.56383	0.493082	0.538365	0.518088	1.11309	0.992674	1.14211	1.15643	1.18382	0.877399	0.554293	0.536791	0.632	0.668252	0.80303	0.631121	1.21804	1.2692	1.2969	1.4517	1.58611	1.55093	chloroplast		GO:0005576 extracellular region; GO:0005622 intracellular; GO:0005623 cell; GO:0005737 cytoplasm; GO:0009507 chloroplast; GO:0009532 plastid stroma; GO:0009534 chloroplast thylakoid; GO:0009535 chloroplast thylakoid membrane; GO:0009536 plastid; GO:0009570 chloroplast stroma; GO:0009579 thylakoid; GO:0016020 membrane; GO:0031976 plastid thylakoid; GO:0031977 thylakoid lumen; GO:0031984 organelle …		K08901	psbQ; photosystem II oxygen-evolving enhancer protein 3	cann00195 Photosynthesis
Capana02g002193	72	0.567027	Down	0.0010381	K	"ATPG_TOBAC ATP synthase gamma chain, chloroplastic OS=Nicotiana tabacum GN=ATPC PE=1 SV=1"	ATPC	1	0.000573237	82.437	IDSVK(1)NTQK(1)ITEAMK	2	3.3003	18	1.4812		1.43035	1.45863	1.54622	1.59835		0.829893	0.821036	0.881978	0.544554		0.901145	0.730349	0.953846	1.05595	1.02491	0.889676		0.734986					chloroplast				K02115	ATPF1G, atpG; F-type H+-transporting ATPase subunit gamma	cann00190 Oxidative phosphorylation; cann00195 Photosynthesis; cann01100 Metabolic pathways	PF00231	ATP synthase
Capana02g002193	347	1.84082	Up	0.00074136	K	"ATPG_TOBAC ATP synthase gamma chain, chloroplastic OS=Nicotiana tabacum GN=ATPC PE=1 SV=1"	ATPC	1	1.7275e-231	301.59	MSAMSSATDNASELK(1)K	2	0.55581	180	0.522556	0.54038	0.621744	1.11466	0.847539	1.1649	0.955573	1.07184	1.07378	0.909091	0.742574	0.880531	0.85744	0.873362	0.823077	1.31786	1.121	1.05769	1.18219	0.956149	0.911132	1.41841	1.53439	1.66156	chloroplast				K02115	ATPF1G, atpG; F-type H+-transporting ATPase subunit gamma	cann00190 Oxidative phosphorylation; cann00195 Photosynthesis; cann01100 Metabolic pathways	PF00231	ATP synthase
Capana02g002554	304	0.646532	Down	0.00140164	K	AROB_THISH 3-dehydroquinate synthase OS=Thioalkalivibrio sp. (strain HL-EbGR7) GN=aroB PE=3 SV=1	aroB	1	1.2256e-152	256.7	SCENK(1)AEVVSQDEK	2	-5.3337	23		1.38495	1.43628	1.16917	1.27168	1.10345	0.918089	0.866235	0.951701	1.03788	1.15771	1.1422	1.19926	1.20416	1.24757	0.720655	0.764205	0.855651	0.833969	0.872201	0.887226	0.727429	0.748433	0.72287	chloroplast	GO:0006082 organic acid metabolic process; GO:0008152 metabolic process; GO:0009058 biosynthetic process; GO:0009987 cellular process; GO:0016053 organic acid biosynthetic process; GO:0019632 shikimate metabolic process; GO:0019752 carboxylic acid metabolic process; GO:0032787 monocarboxylic acid metabolic process; GO:0033587 shikimate biosynthetic process; GO:0043436 oxoacid metabolic process; G…		GO:0003824 catalytic activity; GO:0003856 3-dehydroquinate synthase activity; GO:0016829 lyase activity; GO:0016835 carbon-oxygen lyase activity; GO:0016838 carbon-oxygen lyase activity, acting on phosphates;	K01735	aroB; 3-dehydroquinate synthase [EC:4.2.3.4]	cann00400 Phenylalanine, tyrosine and tryptophan biosynthesis; cann01100 Metabolic pathways; cann01110 Biosynthesis of secondary metabolites; cann01230 Biosynthesis of amino acids	PF01761	3-dehydroquinate synthase
Capana02g002577	70	0.616513	Down	0.0062824	K	"FENR1_TOBAC Ferredoxin--NADP reductase, leaf-type isozyme, chloroplastic OS=Nicotiana tabacum GN=PETH PE=2 SV=1"	PETH	1	3.27797e-16	141.44	K(1)QDEGVVVNK(1)FRPK	2	9.1526	32	1.40302	1.64957	1.65212	1.5006	1.65283	1.62149	1.06961	0.831884	0.999027	0.772772	1.10274	0.891221	0.941799	1.1141	1.10471	1.03608		1.09851	0.811688	0.921794			0.208196	0.32403	chloroplast	GO:0006091 generation of precursor metabolites and energy; GO:0006950 response to stress; GO:0006952 defense response; GO:0008152 metabolic process; GO:0009605 response to external stimulus; GO:0009607 response to biotic stimulus; GO:0009617 response to bacterium; GO:0009767 photosynthetic electron transport chain; GO:0009987 cellular process; GO:0015979 photosynthesis; GO:0019684 photosynthesis,…	GO:0005576 extracellular region; GO:0005622 intracellular; GO:0005623 cell; GO:0005737 cytoplasm; GO:0009507 chloroplast; GO:0009526 plastid envelope; GO:0009532 plastid stroma; GO:0009534 chloroplast thylakoid; GO:0009535 chloroplast thylakoid membrane; GO:0009536 plastid; GO:0009570 chloroplast stroma; GO:0009579 thylakoid; GO:0009941 chloroplast envelope; GO:0016020 membrane; GO:0031967 organe…	GO:0003676 nucleic acid binding; GO:0003723 RNA binding; GO:0003727 single-stranded RNA binding; GO:0003824 catalytic activity; GO:0005488 binding; GO:0005515 protein binding; GO:0008187 poly-pyrimidine tract binding; GO:0008266 poly(U) RNA binding; GO:0009055 electron carrier activity; GO:0016491 oxidoreductase activity; GO:0019904 protein domain specific binding; GO:0045156 electron transporter…	K02641	petH; ferredoxin--NADP+ reductase [EC:1.18.1.2]	cann00195 Photosynthesis; cann01100 Metabolic pathways	PF00175	Oxidoreductase NAD-binding domain
Capana02g002621	55	2.74021	Up	0.00029751	K	"ALFC2_ARATH Probable fructose-bisphosphate aldolase 2, chloroplastic OS=Arabidopsis thaliana GN=FBA2 PE=1 SV=2"	FBA2	1	3.33527e-06	119.94	ASSYADELVK(1)TAK	2	-6.6341	21	0.44774	0.514175	0.483871	0.548246	0.700753	0.676823		1.32659	1.31458	1.47527		1.6965	1.26399	0.814493	0.57517	1.31902	1.47079	1.13378	1.22467	1.12344	0.988999	1.12604	0.955315		chloroplast				K01623	ALDO; fructose-bisphosphate aldolase, class I [EC:4.1.2.13]	cann00010 Glycolysis / Gluconeogenesis; cann00030 Pentose phosphate pathway; cann00051 Fructose and mannose metabolism; cann00710 Carbon fixation in photosynthetic organisms; cann01100 Metabolic pathways; cann01110 Biosynthesis of secondary metabolites; cann01200 Carbon metabolism; cann01230 Biosynthesis of amino acids	PF00274	Fructose-bisphosphate aldolase class-I
Capana02g002887	99	0.53552	Down	3.1122e-06	K	"GLYM_SOLTU Serine hydroxymethyltransferase, mitochondrial OS=Solanum tuberosum PE=2 SV=1"	---	1	0	368.67	YYGGNEYIDMAETLCQK(1)R	2	5.4184	89	1.14466	1.12383	1.10997	1.2229	1.47921	1.12586	0.583804	0.60447	0.62096	0.883243	0.986696	1.1798	1.36383	1.88625	1.62316	0.873922	0.817259	0.808554	0.877264	0.80495	0.731256	0.842219	0.897768	0.865358	cytoplasm	GO:0001505 regulation of neurotransmitter levels; GO:0002376 immune system process; GO:0006082 organic acid metabolic process; GO:0006520 cellular amino acid metabolic process; GO:0006544 glycine metabolic process; GO:0006563 L-serine metabolic process; GO:0006807 nitrogen compound metabolic process; GO:0006950 response to stress; GO:0006952 defense response; GO:0006955 immune response; GO:000762…	GO:0005576 extracellular region; GO:0005622 intracellular; GO:0005623 cell; GO:0005634 nucleus; GO:0005737 cytoplasm; GO:0005739 mitochondrion; GO:0005759 mitochondrial matrix; GO:0005829 cytosol; GO:0005840 ribosome; GO:0005886 plasma membrane; GO:0009507 chloroplast; GO:0009526 plastid envelope; GO:0009532 plastid stroma; GO:0009534 chloroplast thylakoid; GO:0009536 plastid; GO:0009570 chloropl…	GO:0003676 nucleic acid binding; GO:0003723 RNA binding; GO:0003727 single-stranded RNA binding; GO:0003824 catalytic activity; GO:0004372 glycine hydroxymethyltransferase activity; GO:0005488 binding; GO:0008187 poly-pyrimidine tract binding; GO:0008266 poly(U) RNA binding; GO:0016740 transferase activity; GO:0016741 transferase activity, transferring one-carbon groups; GO:0016742 hydroxymethyl-…	K00600	glyA, SHMT; glycine hydroxymethyltransferase [EC:2.1.2.1]	cann00260 Glycine, serine and threonine metabolism; cann00460 Cyanoamino acid metabolism; cann00630 Glyoxylate and dicarboxylate metabolism; cann00670 One carbon pool by folate; cann01100 Metabolic pathways; cann01110 Biosynthesis of secondary metabolites; cann01200 Carbon metabolism; cann01230 Biosynthesis of amino acids	PF00464	Serine hydroxymethyltransferase
Capana02g002928	145	0.640816	Down	6.0683e-05	K	"BCAT5_ARATH Branched-chain-amino-acid aminotransferase 5, chloroplastic OS=Arabidopsis thaliana GN=BCAT5 PE=1 SV=1"	BCAT5	1	3.9667e-41	181.9	K(1)HDGNILLFRPEENATR	3	-6.6726	23	1.37237	1.46544	1.46838	1.4165	1.36	1.45481	0.932934	0.897887	0.928659	0.854792	0.806389	0.711712	1.26407	1.21663	1.22942	0.909198	0.747497		0.758817	0.733753	0.713833	0.669992	0.640988	0.676624	chloroplast		GO:0005622 intracellular; GO:0005623 cell; GO:0005737 cytoplasm; GO:0009507 chloroplast; GO:0009532 plastid stroma; GO:0009536 plastid; GO:0009570 chloroplast stroma; GO:0043226 organelle; GO:0043227 membrane-bounded organelle; GO:0043229 intracellular organelle; GO:0043231 intracellular membrane-bounded organelle; GO:0044422 organelle part; GO:0044424 intracellular part; GO:0044434 chloroplast p…		K00826	E2.6.1.42, ilvE; branched-chain amino acid aminotransferase [EC:2.6.1.42]	cann00270 Cysteine and methionine metabolism; cann00280 Valine, leucine and isoleucine degradation; cann00290 Valine, leucine and isoleucine biosynthesis; cann00770 Pantothenate and CoA biosynthesis; cann01100 Metabolic pathways; cann01110 Biosynthesis of secondary metabolites; cann01210 2-Oxocarboxylic acid metabolism; cann01230 Biosynthesis of amino acids	PF01063	Aminotransferase class IV
Capana02g003173	99	0.642474	Down	0.0020835	K	"PSBO_SOLTU Oxygen-evolving enhancer protein 1, chloroplastic OS=Solanum tuberosum GN=PSBO PE=2 SV=1"	PSBO	1	2.8452e-125	240.94	RLTYDEIQSK(1)TYMEVK	2	0.66826	83		1.31957	1.37717	1.10754	1.20311	1.74398	0.922179	0.836472	0.840231	1.02575	0.878943	0.986219	1.33004	1.35364	1.46095	1.10737	0.716564	0.52669	0.665	0.717565	0.535	0.931804	0.919387	0.778749	chloroplast		GO:0005622 intracellular; GO:0005623 cell; GO:0005737 cytoplasm; GO:0009507 chloroplast; GO:0009534 chloroplast thylakoid; GO:0009535 chloroplast thylakoid membrane; GO:0009536 plastid; GO:0009579 thylakoid; GO:0016020 membrane; GO:0031976 plastid thylakoid; GO:0031984 organelle subcompartment; GO:0034357 photosynthetic membrane; GO:0042651 thylakoid membrane; GO:0043226 organelle; GO:0043227 mem…		K02716	psbO; photosystem II oxygen-evolving enhancer protein 1	cann00195 Photosynthesis
Capana02g003173	133	0.56828	Down	0.00154129	K	"PSBO_SOLTU Oxygen-evolving enhancer protein 1, chloroplastic OS=Solanum tuberosum GN=PSBO PE=2 SV=1"	PSBO	0.999037	7.8788e-141	207.23	GTGTANQCPTVDGGVDSFAFK(0.006)PGK(0.995)YNAK(0.999)K	3	-0.39879	29	1.95416		1.78908	1.89864	2.0401	1.90241	1.00486	1.07334	1.11261	1.00498	0.697357		1.20066	1.13166	1.22002	0.792759	0.834356		0.544	0.687625	0.629		0.291805	0.28312	chloroplast		GO:0005622 intracellular; GO:0005623 cell; GO:0005737 cytoplasm; GO:0009507 chloroplast; GO:0009534 chloroplast thylakoid; GO:0009535 chloroplast thylakoid membrane; GO:0009536 plastid; GO:0009579 thylakoid; GO:0016020 membrane; GO:0031976 plastid thylakoid; GO:0031984 organelle subcompartment; GO:0034357 photosynthetic membrane; GO:0042651 thylakoid membrane; GO:0043226 organelle; GO:0043227 mem…		K02716	psbO; photosystem II oxygen-evolving enhancer protein 1	cann00195 Photosynthesis
Capana02g003587	262	0.636295	Down	0.00130425	K	"DHSB2_ARATH Succinate dehydrogenase [ubiquinone] iron-sulfur subunit 2, mitochondrial OS=Arabidopsis thaliana GN=SDH2-2 PE=1 SV=2"	SDH2-2	1	6.88864e-13	127.94	GLNPGK(1)HIQNIK	2	-7.7274	22		1.28634	1.40416	1.32993	1.33609	1.1875	0.88049	0.835031	0.852406	0.900655	0.940299	0.937079	1.11966		1.19352	0.998927	0.952381	0.923988	0.912222	1.0062	0.971215	0.658972	0.742625	0.733877	mitochondria	GO:0006091 generation of precursor metabolites and energy; GO:0006119 oxidative phosphorylation; GO:0006121 mitochondrial electron transport, succinate to ubiquinone; GO:0006139 nucleobase-containing compound metabolic process; GO:0006163 purine nucleotide metabolic process; GO:0006725 cellular aromatic compound metabolic process; GO:0006753 nucleoside phosphate metabolic process; GO:0006793 phos…	GO:0005622 intracellular; GO:0005623 cell; GO:0005737 cytoplasm; GO:0005739 mitochondrion; GO:0005740 mitochondrial envelope; GO:0005743 mitochondrial inner membrane; GO:0005746 mitochondrial respiratory chain; GO:0005749 mitochondrial respiratory chain complex II, succinate dehydrogenase complex (ubiquinone); GO:0016020 membrane; GO:0019866 organelle inner membrane; GO:0031090 organelle membrane…	GO:0000104 succinate dehydrogenase activity; GO:0003824 catalytic activity; GO:0005488 binding; GO:0008270 zinc ion binding; GO:0009055 electron carrier activity; GO:0016491 oxidoreductase activity; GO:0016627 oxidoreductase activity, acting on the CH-CH group of donors; GO:0043167 ion binding; GO:0043169 cation binding; GO:0046872 metal ion binding; GO:0046914 transition metal ion binding;	K00235	SDHB, SDH2; succinate dehydrogenase (ubiquinone) iron-sulfur subunit [EC:1.3.5.1]	cann00020 Citrate cycle (TCA cycle); cann00190 Oxidative phosphorylation; cann01100 Metabolic pathways; cann01110 Biosynthesis of secondary metabolites; cann01200 Carbon metabolism	PF13085; PF13534	2Fe-2S iron-sulfur cluster binding domain; 4Fe-4S dicluster domain
Capana03g000068	381	0.597456	Down	0.0081585	K	PMEU1_SOLLC Pectinesterase/pectinesterase inhibitor U1 OS=Solanum lycopersicum GN=PMEU1 PE=2 SV=1	PMEU1	1	3.3157e-162	202.58	DITFQNTAGAAK(1)HQAVALR	2	-2.1609	34	0.955497		1.01658	1.20017	1.17301	1.20157		0.568443	0.609784	0.571307	1.19492		1.23502			0.918773	0.922212	0.955024	0.839853	0.801536	0.82	1.11657	1.44297	1.23372	cytoplasm,nucleus	GO:0043086 negative regulation of catalytic activity; GO:0044092 negative regulation of molecular function; GO:0050790 regulation of catalytic activity; GO:0065007 biological regulation; GO:0065009 regulation of molecular function;	GO:0005623 cell; GO:0044464 cell part; GO:0071944 cell periphery;	GO:0003824 catalytic activity; GO:0004857 enzyme inhibitor activity; GO:0016787 hydrolase activity; GO:0016788 hydrolase activity, acting on ester bonds; GO:0030234 enzyme regulator activity; GO:0030599 pectinesterase activity; GO:0046910 pectinesterase inhibitor activity; GO:0052689 carboxylic ester hydrolase activity; GO:0098772 molecular function regulator;	K01051	E3.1.1.11; pectinesterase [EC:3.1.1.11]	cann00040 Pentose and glucuronate interconversions; cann01100 Metabolic pathways	PF04043	Plant invertase/pectin methylesterase inhibitor
Capana03g000142	478	0.580102	Down	0.00068362	K	"THRC_SOLTU Threonine synthase, chloroplastic OS=Solanum tuberosum PE=2 SV=1"	---	1	3.73271e-06	106.35	FTQSK(1)IDYHSK	2	6.5956	22	1.20556	1.29965	1.41245	1.35982	1.60556	1.44132	0.809137	0.721715	0.741792	0.721212	0.818089	0.773218	1.33794		1.38873	0.778571		0.727788	0.645946	0.812373	0.805697		0.536269	0.585034	chloroplast		GO:0005622 intracellular; GO:0005623 cell; GO:0005737 cytoplasm; GO:0044424 intracellular part; GO:0044464 cell part;	GO:0003824 catalytic activity; GO:0004795 threonine synthase activity; GO:0005488 binding; GO:0008144 drug binding; GO:0016829 lyase activity; GO:0016835 carbon-oxygen lyase activity; GO:0016838 carbon-oxygen lyase activity, acting on phosphates; GO:0019842 vitamin binding; GO:0030170 pyridoxal phosphate binding; GO:0036094 small molecule binding; GO:0043167 ion binding; GO:0043168 anion binding;…	K01733	thrC; threonine synthase [EC:4.2.3.1]	cann00260 Glycine, serine and threonine metabolism; cann00750 Vitamin B6 metabolism; cann01100 Metabolic pathways; cann01110 Biosynthesis of secondary metabolites; cann01230 Biosynthesis of amino acids
Capana03g000163	244	0.610152	Down	0.0055431	K	GLYR1_CHICK Putative oxidoreductase GLYR1 OS=Gallus gallus GN=GLYR1 PE=2 SV=1	GLYR1	1	0.000595735	111.98	GPSMVK(1)SSYPTAFPLK	2	-3.8328	17	1.24105	1.42321	1.46059	1.1714		1.19197	0.862167	0.81569			0.868583	1.0523	1.2404	1.35616	1.36588			0.729577	0.766316		0.563996	0.761665	0.893147		chloroplast	GO:0008152 metabolic process; GO:0055114 oxidation-reduction process;	GO:0005622 intracellular; GO:0005623 cell; GO:0005737 cytoplasm; GO:0009507 chloroplast; GO:0009532 plastid stroma; GO:0009536 plastid; GO:0009570 chloroplast stroma; GO:0043226 organelle; GO:0043227 membrane-bounded organelle; GO:0043229 intracellular organelle; GO:0043231 intracellular membrane-bounded organelle; GO:0044422 organelle part; GO:0044424 intracellular part; GO:0044434 chloroplast p…	GO:0003824 catalytic activity; GO:0016491 oxidoreductase activity; GO:0016614 oxidoreductase activity, acting on CH-OH group of donors; GO:0016616 oxidoreductase activity, acting on the CH-OH group of donors, NAD or NADP as acceptor; GO:0030267 glyoxylate reductase (NADP) activity;	K18121	GLYR; glyoxylate/succinic semialdehyde reductase [EC:1.1.1.79 1.1.1.-]	cann00630 Glyoxylate and dicarboxylate metabolism; cann00650 Butanoate metabolism; cann01100 Metabolic pathways; cann01200 Carbon metabolism	PF03446	NAD binding domain of 6-phosphogluconate dehydrogenase
Capana03g000245	161	0.650251	Down	0.0135571	K	HXK1_TOBAC Hexokinase-1 OS=Nicotiana tabacum GN=HXK1 PE=2 SV=1	HXK1	1	1.84965e-07	137.58	FVAEEEEK(1)FHQPDGK	2	-1.5532	18	1.13573	1.11636	1.33974	1.22449		0.998028	0.89557	0.666939	0.773083				0.92999	1.19635		0.528112	0.764338	0.833816	1.21639	0.937701	1.23601		1.29838	0.890805	chloroplast				K00844	HK; hexokinase [EC:2.7.1.1]	cann00010 Glycolysis / Gluconeogenesis; cann00051 Fructose and mannose metabolism; cann00052 Galactose metabolism; cann00500 Starch and sucrose metabolism; cann00520 Amino sugar and nucleotide sugar metabolism; cann01100 Metabolic pathways; cann01110 Biosynthesis of secondary metabolites; cann01200 Carbon metabolism	PF00349; PF03727	Hexokinase; Hexokinase
Capana03g000354	222	0.541173	Down	0.000140052	K	STRAP_DICDI Serine-threonine kinase receptor-associated protein OS=Dictyostelium discoideum GN=strap PE=3 SV=1	strap	1	2.0383e-16	124.69	FWDANHFGLVK(1)SHDLPCK	3	-1.0446	34	1.43141	1.41456	1.5	1.38611	1.52578	1.46371	0.792632		0.775316	0.670201	0.73081	0.693219	1.18689	1.14995	1.28721	0.817748	0.743927	0.853955	0.686335	0.734801			0.438031		nucleus				K13137	STRAP, UNRIP; serine-threonine kinase receptor-associated protein	cann03013 RNA transport
Capana03g000388	404	0.377694	Down	0.0128395	K	ERF3A_MOUSE Eukaryotic peptide chain release factor GTP-binding subunit ERF3A OS=Mus musculus GN=Gspt1 PE=1 SV=1	Gspt1	1	0.000976609	116.13	KPLFVK(1)NGAIVLCR	2	3.7249	21		1.62569	1.55261	2.45489			0.769359	0.471074	0.560205					0.989712	0.816573	0.624912			0.72318		0.81592				cytoplasm				K03267	ERF3, GSPT; peptide chain release factor subunit 3	cann03015 mRNA surveillance pathway	PF00009; PF03144; PF03143	Elongation factor Tu GTP binding domain; Elongation factor Tu domain 2; Elongation factor Tu C-terminal domain
Capana03g000487	274	0.563054	Down	0.00085735	K	SDF2_ARATH Stromal cell-derived factor 2-like protein OS=Arabidopsis thaliana GN=At2g25110 PE=1 SV=1	At2g25110	1	5.11154e-05	164.56	FQHVDTGGYLHSHDK(1)K	3	-6.3897	22	1.08961	1.0877	1.17215	1.02669	1.16887	0.987805		0.651961	0.605322	0.895467	0.866102	0.926987		1.05769	1.3	0.756322	0.739274	0.734807	0.929752	1.08018	1.19752	1.07944	1.12771	1.11458	mitochondria							PF02815	MIR domain
Capana03g000613	91	0.429512	Down	0.029525	K	RUBR1_DESDA Rubredoxin-1 OS=Desulfovibrio desulfuricans (strain ATCC 27774 / DSM 6949) GN=rd1 PE=1 SV=1	rd1	1	1.66169e-09	147.72	LPDK(1)YFCPVCGAPK	2	-4.2458	24	2.82103	2.0378	1.67292	1.22496	1.18072	1.17325	0.839861	1.03045		0.824277	0.953107	0.883553	1.09234	1.07523	1.25823	0.862197	0.789908	0.806759	0.791802	0.765708	0.810307	0.589342	0.65	0.725376	chloroplast							PF00301	Rubredoxin
Capana03g000726	140	2.4808	Up	0.0121016	K	GBLP_NICPL Guanine nucleotide-binding protein subunit beta-like protein OS=Nicotiana plumbaginifolia PE=2 SV=1	---	1	1.19832e-77	193.67	LWNTLGECK(1)YTIQDGDSHSDWVSCVR	3	-0.7606	22	0.836422	0.695993	1.11469	0.592413	0.813322		1.60026	2.73014	2.23655	1.56825	1.17076	1.06336	1.63253	1.00897	1.01736		0.381347	0.45645	1.1921	1.00685	1	0.255793		0.236542	nucleus	GO:0001101 response to acid chemical; GO:0001932 regulation of protein phosphorylation; GO:0001934 positive regulation of protein phosphorylation; GO:0006417 regulation of translation; GO:0006950 response to stress; GO:0006952 defense response; GO:0007275 multicellular organism development; GO:0009605 response to external stimulus; GO:0009607 response to biotic stimulus; GO:0009620 response to fu…	GO:0005622 intracellular; GO:0005623 cell; GO:0005634 nucleus; GO:0005730 nucleolus; GO:0005737 cytoplasm; GO:0005829 cytosol; GO:0005840 ribosome; GO:0005844 polysome; GO:0005886 plasma membrane; GO:0016020 membrane; GO:0022626 cytosolic ribosome; GO:0031974 membrane-enclosed lumen; GO:0031981 nuclear lumen; GO:0032991 macromolecular complex; GO:0042788 polysomal ribosome; GO:0043226 organelle; …	GO:0003735 structural constituent of ribosome; GO:0005078 MAP-kinase scaffold activity; GO:0005198 structural molecule activity; GO:0005488 binding; GO:0005515 protein binding; GO:0019899 enzyme binding; GO:0019900 kinase binding; GO:0032947 protein complex scaffold; GO:0035591 signaling adaptor activity; GO:0060090 binding, bridging;	K14753	RACK1; guanine nucleotide-binding protein subunit beta-2-like 1 protein
Capana03g000767	252	0.580104	Down	0.000164665	K	AB hydrolase-1 domain-containing protein	---	1	3.58357e-97	206.14	SIQSQYK(1)SHVYADPEK	2	2.5404	46	1.30334	1.40665	1.39424	1.23782	1.49381	1.36814	0.823587	0.743925	0.81337	0.951265	0.977778	0.956238	1.19689	1.29329	1.30444	0.711656	0.749744	0.813636	0.777892	0.758767	0.702732	0.738997	0.778797	0.668307	chloroplast							PF12697	Alpha/beta hydrolase family
Capana03g000806	243	1.52144	Up	0.0049566	K	"RPE_SOLTU Ribulose-phosphate 3-epimerase, chloroplastic (Fragment) OS=Solanum tuberosum PE=1 SV=1"	---	1	1.5657e-266	293.95	GLNPWIEVDGGVGPK(1)NAYK	2	6.0769	62	1.21555	0.951467	1.05177	1.1713	1.10195	1.03403	1.69882	1.55587	1.64251	0.90449	0.735518	0.778045	1.19467	1.135	1.0424	0.976526	1.01053	0.932636	1.04614	1.12171	1.00238	0.516354	0.555397	0.489303	chloroplast	GO:0005975 carbohydrate metabolic process; GO:0005996 monosaccharide metabolic process; GO:0006081 cellular aldehyde metabolic process; GO:0006098 pentose-phosphate shunt; GO:0006139 nucleobase-containing compound metabolic process; GO:0006725 cellular aromatic compound metabolic process; GO:0006732 coenzyme metabolic process; GO:0006733 oxidoreduction coenzyme metabolic process; GO:0006739 NADP …	GO:0005622 intracellular; GO:0005623 cell; GO:0005737 cytoplasm; GO:0005829 cytosol; GO:0009507 chloroplast; GO:0009534 chloroplast thylakoid; GO:0009535 chloroplast thylakoid membrane; GO:0009536 plastid; GO:0009579 thylakoid; GO:0016020 membrane; GO:0031976 plastid thylakoid; GO:0031984 organelle subcompartment; GO:0034357 photosynthetic membrane; GO:0042651 thylakoid membrane; GO:0043226 organ…	GO:0003824 catalytic activity; GO:0004750 ribulose-phosphate 3-epimerase activity; GO:0005488 binding; GO:0016853 isomerase activity; GO:0016854 racemase and epimerase activity; GO:0016857 racemase and epimerase activity, acting on carbohydrates and derivatives; GO:0043167 ion binding; GO:0043169 cation binding; GO:0046872 metal ion binding;	K01783	rpe, RPE; ribulose-phosphate 3-epimerase [EC:5.1.3.1]	cann00030 Pentose phosphate pathway; cann00040 Pentose and glucuronate interconversions; cann00710 Carbon fixation in photosynthetic organisms; cann01100 Metabolic pathways; cann01110 Biosynthesis of secondary metabolites; cann01200 Carbon metabolism; cann01230 Biosynthesis of amino acids	PF00834	Ribulose-phosphate 3 epimerase family
Capana03g000825	36	0.631248	Down	0.0043435	K	IF5A5_SOLTU Eukaryotic translation initiation factor 5A-5 OS=Solanum tuberosum GN=EIF5A5 PE=2 SV=1	EIF5A5	1	8.75102e-27	146.88	NGHIVIK(1)NRPCK	3	-3.7654	96	1.32255	1.06262	1.34311	1.27128	1.19542	1.25791	0.804948	0.7942	0.754319	1.03923	0.879007	0.878496	1.31813	1.22361	1.19937	0.733598	0.76868	0.631749	1.05814	0.920892	0.868421		0.436364		cytoplasm				K03263	EIF5A; translation initiation factor 5A		PF01287	Eukaryotic elongation factor 5A hypusine, DNA-binding OB fold
Capana03g001207	47	0.660091	Down	0.00070498	K	R27A3_ARATH 60S ribosomal protein L27a-3 OS=Arabidopsis thaliana GN=RPL27AC PE=2 SV=2	RPL27AC	1	3.55289e-05	101.45	ILFDK(1)YHPGYFGK	2	-1.4133	24	1.18173	1.11441	1.15253	1.15385	1.16981	1.15451	0.740084	0.77754		0.996231	1.0111	1.19152	0.96394	1.04964	1.12478	0.861554	0.909091	0.903811	0.868946	0.772856	0.773283	0.854141		0.915082	nucleus				K02900	RP-L27Ae, RPL27A; large subunit ribosomal protein L27Ae	cann03010 Ribosome
Capana03g001353	345	0.450634	Down	0.0082	K	"MASY_GOSHI Malate synthase, glyoxysomal OS=Gossypium hirsutum PE=2 SV=1"	---	1	1.995e-145	245.4	SYSDLLIHTCHK(1)R	2	-4.9161	36	1.32353		1.4754	2.20528	1.71179		0.737113	0.531606	0.623218	0.743743	0.979592	0.650407	0.991625	1.30417	1.22801	0.852086	0.820265	0.872996	0.673195	0.890909	0.624402	0.746528	0.539754	0.750577	peroxisome	GO:0005975 carbohydrate metabolic process; GO:0006081 cellular aldehyde metabolic process; GO:0006082 organic acid metabolic process; GO:0006097 glyoxylate cycle; GO:0008152 metabolic process; GO:0009987 cellular process; GO:0019752 carboxylic acid metabolic process; GO:0032787 monocarboxylic acid metabolic process; GO:0043436 oxoacid metabolic process; GO:0044237 cellular metabolic process; GO:0…	GO:0005622 intracellular; GO:0005623 cell; GO:0005737 cytoplasm; GO:0005777 peroxisome; GO:0009514 glyoxysome; GO:0042579 microbody; GO:0043226 organelle; GO:0043227 membrane-bounded organelle; GO:0043229 intracellular organelle; GO:0043231 intracellular membrane-bounded organelle; GO:0044424 intracellular part; GO:0044444 cytoplasmic part; GO:0044464 cell part;	GO:0003824 catalytic activity; GO:0004474 malate synthase activity; GO:0016740 transferase activity; GO:0016746 transferase activity, transferring acyl groups; GO:0046912 transferase activity, transferring acyl groups, acyl groups converted into alkyl on transfer;	K01638	aceB, glcB; malate synthase [EC:2.3.3.9]	cann00620 Pyruvate metabolism; cann00630 Glyoxylate and dicarboxylate metabolism; cann01100 Metabolic pathways; cann01110 Biosynthesis of secondary metabolites; cann01200 Carbon metabolism
Capana03g001821	182	0.419157	Down	0.0034412	K	SUBL_ARATH Subtilisin-like protease OS=Arabidopsis thaliana GN=ARA12 PE=1 SV=1	ARA12	1	4.9621e-08	155.28	GHCQSGEK(1)FDPAMACNR	2	-0.3592	14	1.00583	0.955469		1.39608	1.16867	0.873437	0.392857	0.429234					0.833481	0.926403	1.09668		0.687082	0.691239							chloroplast							PF05922; PF00082	Peptidase inhibitor I9; Subtilase family
Capana03g001893	56	3.41251	Up	0.0076763	K	"GSA_SOLLC Glutamate-1-semialdehyde 2,1-aminomutase, chloroplastic OS=Solanum lycopersicum PE=2 SV=1"	---	1	8.06494e-06	112.7	TYTLQK(1)SEEAFNK(1)AK	2	11.296	37	0.87177	0.447342	0.390816	0.477028	1.16831	0.913347	2.23132	1.87227	1.73156	1.68568	1.35889	0.347207	0.918	0.970414	0.66075	1.11975	0.88172	1.01728	1.16261		0.187154	0.957724	0.876305		chloroplast		GO:0005576 extracellular region; GO:0005622 intracellular; GO:0005623 cell; GO:0005737 cytoplasm; GO:0009507 chloroplast; GO:0009526 plastid envelope; GO:0009532 plastid stroma; GO:0009536 plastid; GO:0009570 chloroplast stroma; GO:0009941 chloroplast envelope; GO:0031967 organelle envelope; GO:0031975 envelope; GO:0043226 organelle; GO:0043227 membrane-bounded organelle; GO:0043229 intracellular…		K01845	hemL; glutamate-1-semialdehyde 2,1-aminomutase [EC:5.4.3.8]	cann00860 Porphyrin and chlorophyll metabolism; cann01100 Metabolic pathways; cann01110 Biosynthesis of secondary metabolites	PF00202	Aminotransferase class-III
Capana03g001974	124	0.386368	Down	0.0047775	K	"TL17_ARATH Thylakoid lumenal 17.4 kDa protein, chloroplastic OS=Arabidopsis thaliana GN=At5g53490 PE=1 SV=2"	At5g53490	1	1.33321e-16	167.76	FCDYTNEK(1)TNLK(1)GK	2	9.8342	35	2.2126	2.50242	1.93939	1.37679	1.84439	1.22623	0.653456	0.806256	1.11134	0.703101	1.09638	1.05841	1.17694	1.36259	1.03563	1.77111	0.915694	1.08976	0.942794	0.601042	0.586957	0.417629	0.471148	0.418217	chloroplast
Capana03g002084	313	0.630102	Down	0.0056395	K	"KPYG_TOBAC Pyruvate kinase isozyme G, chloroplastic OS=Nicotiana tabacum PE=2 SV=1"	---	1	5.95584e-16	136.06	DAAVVHELK(1)NYLK	2	-0.20023	23	1.1786		1.19617	1.52232	1.51465	1.2011	0.815789	0.685835	0.742898	0.782326	0.730263	0.717536	1.07678	1.38732	1.09333	0.985462	1.08756	1.10202		0.996907	0.92	0.747021	0.744604	0.688509	chloroplast	GO:0000003 reproduction; GO:0003006 developmental process involved in reproduction; GO:0005975 carbohydrate metabolic process; GO:0006082 organic acid metabolic process; GO:0006090 pyruvate metabolic process; GO:0006091 generation of precursor metabolites and energy; GO:0006096 glycolytic process; GO:0006139 nucleobase-containing compound metabolic process; GO:0006163 purine nucleotide metabolic …	GO:0005622 intracellular; GO:0005623 cell; GO:0005737 cytoplasm; GO:0005739 mitochondrion; GO:0009507 chloroplast; GO:0009532 plastid stroma; GO:0009536 plastid; GO:0009570 chloroplast stroma; GO:0043226 organelle; GO:0043227 membrane-bounded organelle; GO:0043229 intracellular organelle; GO:0043231 intracellular membrane-bounded organelle; GO:0044422 organelle part; GO:0044424 intracellular part…	GO:0000287 magnesium ion binding; GO:0003824 catalytic activity; GO:0004743 pyruvate kinase activity; GO:0005488 binding; GO:0016740 transferase activity; GO:0016772 transferase activity, transferring phosphorus-containing groups; GO:0016773 phosphotransferase activity, alcohol group as acceptor; GO:0030955 potassium ion binding; GO:0031420 alkali metal ion binding; GO:0043167 ion binding; GO:004…	K00873	PK, pyk; pyruvate kinase [EC:2.7.1.40]	cann00010 Glycolysis / Gluconeogenesis; cann00230 Purine metabolism; cann00620 Pyruvate metabolism; cann01100 Metabolic pathways; cann01110 Biosynthesis of secondary metabolites; cann01200 Carbon metabolism; cann01230 Biosynthesis of amino acids	PF02887	Pyruvate kinase, alpha/beta domain
Capana03g002267	122	2.04739	Up	0.026763	K	"UCRIA_SOLTU Cytochrome b6-f complex iron-sulfur subunit, chloroplastic OS=Solanum tuberosum GN=petC PE=2 SV=1"	petC	1	2.79289e-37	219.59	DALGNDVVASEWLK(1)THAPGSR	3	-7.425	24	0.521226	0.580411	0.595533	0.779083	0.906091	0.92674	0.759454	1.4249	1.29042	1.68919	0.719547	0.856239	1.80418	0.968822	0.870044	0.969731	0.905742	1.03478	0.918232	0.844995	0.875556	1.08648	1.06273	1.12903	chloroplast		GO:0005622 intracellular; GO:0005623 cell; GO:0005737 cytoplasm; GO:0009507 chloroplast; GO:0009534 chloroplast thylakoid; GO:0009535 chloroplast thylakoid membrane; GO:0009536 plastid; GO:0009579 thylakoid; GO:0016020 membrane; GO:0031976 plastid thylakoid; GO:0031984 organelle subcompartment; GO:0034357 photosynthetic membrane; GO:0042651 thylakoid membrane; GO:0043226 organelle; GO:0043227 mem…		K02636	petC; cytochrome b6-f complex iron-sulfur subunit [EC:1.10.9.1]	cann00195 Photosynthesis; cann01100 Metabolic pathways	PF08802; PF00355	Cytochrome B6-F complex Fe-S subunit ; Rieske [2Fe-2S] domain
Capana03g002682	215	0.503373	Down	0.0119829	K	MSRA_LACSA Peptide methionine sulfoxide reductase OS=Lactuca sativa PE=2 SV=1	---	1	4.28831e-47	163.59	AEEYHQQYLAK(1)GGR	2	-3.0271	32	1.27901	1.69203	1.65074	1.56953	1.74172	1.48939	0.937722	0.596899	0.791855	0.634167	0.845118	0.858678	1.24419	1.32903	0.988134	0.881757	0.726115	0.813778	0.554759	0.760396	0.656731	0.980299		1.04507	nucleus	GO:0006950 response to stress; GO:0006970 response to osmotic stress; GO:0006979 response to oxidative stress; GO:0008152 metabolic process; GO:0009314 response to radiation; GO:0009416 response to light stimulus; GO:0009628 response to abiotic stimulus; GO:0009651 response to salt stress; GO:0009719 response to endogenous stimulus; GO:0009725 response to hormone; GO:0009735 response to cytokinin…	GO:0005622 intracellular; GO:0005623 cell; GO:0005737 cytoplasm; GO:0005739 mitochondrion; GO:0009507 chloroplast; GO:0009526 plastid envelope; GO:0009532 plastid stroma; GO:0009536 plastid; GO:0009570 chloroplast stroma; GO:0009941 chloroplast envelope; GO:0031967 organelle envelope; GO:0031975 envelope; GO:0043226 organelle; GO:0043227 membrane-bounded organelle; GO:0043229 intracellular organe…	GO:0003824 catalytic activity; GO:0008113 peptide-methionine (S)-S-oxide reductase activity; GO:0016491 oxidoreductase activity; GO:0016667 oxidoreductase activity, acting on a sulfur group of donors; GO:0016671 oxidoreductase activity, acting on a sulfur group of donors, disulfide as acceptor;	K07304	msrA; peptide-methionine (S)-S-oxide reductase [EC:1.8.4.11]
Capana03g003115	74	0.449704	Down	0.0142832	K	"Rhodanese-like domain-containing protein 9, chloroplastic"	---	1	4.17832e-90	130	AHIK(1)NCYHVPLFVENTDNDLGTIVK	3	-2.663	26	2.62053	2.46512	1.64553	1.87622	2.0251	1.77262	0.78483	1.05	1.1922	0.537465	0.571689	0.756867	1.06182	1.0614	0.998981	0.773171	0.805861	0.61245	0.83758	0.827309	0.816573				chloroplast		GO:0005622 intracellular; GO:0005623 cell; GO:0005737 cytoplasm; GO:0009507 chloroplast; GO:0009534 chloroplast thylakoid; GO:0009535 chloroplast thylakoid membrane; GO:0009536 plastid; GO:0009579 thylakoid; GO:0016020 membrane; GO:0031976 plastid thylakoid; GO:0031984 organelle subcompartment; GO:0034357 photosynthetic membrane; GO:0042651 thylakoid membrane; GO:0043226 organelle; GO:0043227 mem…					PF00581	Rhodanese-like domain
Capana03g003135	134	0.588564	Down	0.0025648	K	FPPS1_LUPAL Farnesyl pyrophosphate synthase 1 OS=Lupinus albus GN=FPS1 PE=2 SV=1	FPS1	1	0.0103872	61.494	ILK(1)NHFR	2	-2.1579	16	1.29749		1.12207		1.16004	1.15378	0.723386	0.717128	0.695577		0.818281	0.834611	1.10121	1.14577	1.11448	0.853684		0.941526	0.77682	0.797753					cytoplasm				K00787	FDPS; farnesyl diphosphate synthase [EC:2.5.1.1 2.5.1.10]	cann00900 Terpenoid backbone biosynthesis; cann01100 Metabolic pathways; cann01110 Biosynthesis of secondary metabolites	PF00348	Polyprenyl synthetase
Capana03g003222	290	0.611704	Down	0.0081783	K	"CYP37_ARATH Peptidyl-prolyl cis-trans isomerase CYP37, chloroplastic OS=Arabidopsis thaliana GN=CYP37 PE=1 SV=3"	CYP37	1	3.69179e-08	125.14	VDGSAFSPEAAGEAK(1)STAK	2	-2.6837	21	1.58852	1.2531	1.30769	1.34852	1.19886	1.11812	0.900093	0.904849	0.733211	1.00527	0.955397	0.882988		1.2439	1		0.669197	0.686631	0.839653		0.850698	0.772242	0.947098	0.974112	chloroplast	GO:0000413 protein peptidyl-prolyl isomerization; GO:0006464 cellular protein modification process; GO:0006807 nitrogen compound metabolic process; GO:0008152 metabolic process; GO:0009987 cellular process; GO:0018193 peptidyl-amino acid modification; GO:0018208 peptidyl-proline modification; GO:0019538 protein metabolic process; GO:0036211 protein modification process; GO:0043170 macromolecule m…	GO:0005622 intracellular; GO:0005623 cell; GO:0005737 cytoplasm; GO:0009507 chloroplast; GO:0009534 chloroplast thylakoid; GO:0009535 chloroplast thylakoid membrane; GO:0009536 plastid; GO:0009579 thylakoid; GO:0016020 membrane; GO:0031976 plastid thylakoid; GO:0031977 thylakoid lumen; GO:0031984 organelle subcompartment; GO:0034357 photosynthetic membrane; GO:0042651 thylakoid membrane; GO:00432…	GO:0003755 peptidyl-prolyl cis-trans isomerase activity; GO:0003824 catalytic activity; GO:0016853 isomerase activity; GO:0016859 cis-trans isomerase activity;				PF00160	Cyclophilin type peptidyl-prolyl cis-trans isomerase/CLD
Capana03g003441	93	0.560144	Down	0.002897	K	LSM2_MOUSE U6 snRNA-associated Sm-like protein LSm2 OS=Mus musculus GN=Lsm2 PE=2 SV=1	Lsm2	1	1.01705e-06	94.804	VVDEDK(1)YPHMR	2	-7.9788	18	1.14801		1.12651			1.27892	0.618048		0.656009	0.647944		1.00866	1.31676									1.15112	0.989848		cytoplasm	GO:0000375 RNA splicing, via transesterification reactions; GO:0000377 RNA splicing, via transesterification reactions with bulged adenosine as nucleophile; GO:0000398 mRNA splicing, via spliceosome; GO:0006139 nucleobase-containing compound metabolic process; GO:0006396 RNA processing; GO:0006397 mRNA processing; GO:0006725 cellular aromatic compound metabolic process; GO:0006807 nitrogen compou…	GO:0000932 P-body; GO:0005622 intracellular; GO:0005623 cell; GO:0005634 nucleus; GO:0005681 spliceosomal complex; GO:0005688 U6 snRNP; GO:0005737 cytoplasm; GO:0005829 cytosol; GO:0030532 small nuclear ribonucleoprotein complex; GO:0032991 macromolecular complex; GO:0035770 ribonucleoprotein granule; GO:0036464 cytoplasmic ribonucleoprotein granule; GO:0043226 organelle; GO:0043227 membrane-boun…		K12621	LSM2; U6 snRNA-associated Sm-like protein LSm2	cann03018 RNA degradation; cann03040 Spliceosome	PF01423	LSM domain
Capana03g004091	322	1.89686	Up	0.02864	K	HHT1_ARATH Omega-hydroxypalmitate O-feruloyl transferase OS=Arabidopsis thaliana GN=HHT1 PE=1 SV=1	HHT1	1	0.000454319	95.311	LIK(1)NEIIDER	2	-8.2858	19		0.605103	0.753477	1.23581	1.14923		1.24823	1.54649	1.07083	1.07829	1.22245		0.887387	1.07656	0.935507	1.05725	1.10441		0.978206	1.01264	0.861815		0.505814		cytoplasm	GO:0000038 very long-chain fatty acid metabolic process; GO:0006082 organic acid metabolic process; GO:0006629 lipid metabolic process; GO:0006631 fatty acid metabolic process; GO:0006633 fatty acid biosynthetic process; GO:0007275 multicellular organism development; GO:0008152 metabolic process; GO:0008610 lipid biosynthetic process; GO:0009058 biosynthetic process; GO:0009555 pollen development…	GO:0005622 intracellular; GO:0005623 cell; GO:0005737 cytoplasm; GO:0005829 cytosol; GO:0009507 chloroplast; GO:0009534 chloroplast thylakoid; GO:0009535 chloroplast thylakoid membrane; GO:0009536 plastid; GO:0009579 thylakoid; GO:0016020 membrane; GO:0031976 plastid thylakoid; GO:0031984 organelle subcompartment; GO:0034357 photosynthetic membrane; GO:0042651 thylakoid membrane; GO:0043226 organ…
Capana03g004369	413	0.596153	Down	0.00192281	K	"THIK2_ARATH 3-ketoacyl-CoA thiolase 2, peroxisomal OS=Arabidopsis thaliana GN=PED1 PE=1 SV=2"	PED1	1	3.80442e-08	154.81	CVATLLHEMK(1)R	2	-5.7483	24	1.22727	1.30111	1.25557	1.37963	1.45648	1.35394	0.844898	0.663	0.747917	0.854839	1.002	0.902846	1.08412	1.37225	1.23513	0.944444	0.899614	0.929537	0.801318	0.96	1.01448	0.574879	0.639511	0.650051	cytoplasm	GO:0006082 organic acid metabolic process; GO:0006629 lipid metabolic process; GO:0006631 fatty acid metabolic process; GO:0006635 fatty acid beta-oxidation; GO:0006950 response to stress; GO:0006996 organelle organization; GO:0007031 peroxisome organization; GO:0008152 metabolic process; GO:0009056 catabolic process; GO:0009058 biosynthetic process; GO:0009062 fatty acid catabolic process; GO:00…	GO:0005622 intracellular; GO:0005623 cell; GO:0005634 nucleus; GO:0005730 nucleolus; GO:0005737 cytoplasm; GO:0005739 mitochondrion; GO:0005773 vacuole; GO:0005774 vacuolar membrane; GO:0005777 peroxisome; GO:0009507 chloroplast; GO:0009514 glyoxysome; GO:0009536 plastid; GO:0016020 membrane; GO:0031090 organelle membrane; GO:0031974 membrane-enclosed lumen; GO:0031981 nuclear lumen; GO:0042579 m…	GO:0003824 catalytic activity; GO:0003988 acetyl-CoA C-acyltransferase activity; GO:0016408 C-acyltransferase activity; GO:0016740 transferase activity; GO:0016746 transferase activity, transferring acyl groups; GO:0016747 transferase activity, transferring acyl groups other than amino-acyl groups;	K07513	ACAA1; acetyl-CoA acyltransferase 1 [EC:2.3.1.16]	cann00071 Fatty acid degradation; cann00280 Valine, leucine and isoleucine degradation; cann00592 alpha-Linolenic acid metabolism; cann01040 Biosynthesis of unsaturated fatty acids; cann01100 Metabolic pathways; cann01110 Biosynthesis of secondary metabolites; cann01212 Fatty acid metabolism; cann04146 Peroxisome	PF00108; PF02803	Thiolase, N-terminal domain; Thiolase, C-terminal domain
Capana03g004441	112	0.617406	Down	0.0019556	K	PRS2_SOLTU Pathogenesis-related protein STH-2 OS=Solanum tuberosum GN=STH-2 PE=2 SV=1	STH-2	1	8.31173e-20	182.52	FEASGNGGCVCK(1)TTSEYHTK	3	-6.3383	38	1.52465	1.70312	1.6677	1.50866	1.17482	1.46941	1.12681	0.956092	0.939597	0.730594	0.620233	0.784858	1.0117	1.16518		0.684035			0.738462	0.682692	0.93067	0.482224	0.499106	0.631041	cytoplasm							PF00407	Pathogenesis-related protein Bet v I family
Capana03g004582	170	0.622538	Down	0.0079389	K	NDHN_CYAP8 NAD(P)H-quinone oxidoreductase subunit N OS=Cyanothece sp. (strain PCC 8801) GN=ndhN PE=3 SV=1	ndhN	1	0.00172797	64.906	FHPVCPAHVGK(1)QPIAR	3	-7.4905	11	1.0411	1.23026	1.24039	1.2423	1.67909	1.46117		0.719523	0.737937		0.574932						0.524194				0.561237				mitochondria	GO:0002376 immune system process; GO:0006950 response to stress; GO:0006952 defense response; GO:0006955 immune response; GO:0009605 response to external stimulus; GO:0009607 response to biotic stimulus; GO:0009620 response to fungus; GO:0009814 defense response, incompatible interaction; GO:0009817 defense response to fungus, incompatible interaction; GO:0009987 cellular process; GO:0010257 NADH…	GO:0005622 intracellular; GO:0005623 cell; GO:0005737 cytoplasm; GO:0009507 chloroplast; GO:0009526 plastid envelope; GO:0009534 chloroplast thylakoid; GO:0009535 chloroplast thylakoid membrane; GO:0009536 plastid; GO:0009579 thylakoid; GO:0009941 chloroplast envelope; GO:0010598 NAD(P)H dehydrogenase complex (plastoquinone); GO:0016020 membrane; GO:0031967 organelle envelope; GO:0031975 envelope…
Capana03g004607	185	0.545968	Down	7.7386e-05	K	"GME1_ORYSJ GDP-mannose 3,5-epimerase 1 OS=Oryza sativa subsp. japonica GN=GME-1 PE=1 SV=1"	GME-1	1	3.06871e-54	191.24	LATEELCK(1)HYNK	2	2.8806	83	1.23346	1.31212	1.39547	1.51902	1.28439	1.28052	0.716475	0.724806	0.710403	0.756144	0.776316	0.763251	1.34871	1.59803	1.50806	0.784934	1.01371	0.914595	0.791872	0.986129	0.926453	0.554318	0.627907	0.591234	cytoskeleton	GO:0005975 carbohydrate metabolic process; GO:0005996 monosaccharide metabolic process; GO:0006082 organic acid metabolic process; GO:0006732 coenzyme metabolic process; GO:0006766 vitamin metabolic process; GO:0006767 water-soluble vitamin metabolic process; GO:0008152 metabolic process; GO:0009058 biosynthetic process; GO:0009108 coenzyme biosynthetic process; GO:0009110 vitamin biosynthetic pr…	GO:0005622 intracellular; GO:0005623 cell; GO:0005737 cytoplasm; GO:0005829 cytosol; GO:0044424 intracellular part; GO:0044444 cytoplasmic part; GO:0044464 cell part;	GO:0000166 nucleotide binding; GO:0003824 catalytic activity; GO:0005488 binding; GO:0016853 isomerase activity; GO:0016854 racemase and epimerase activity; GO:0016857 racemase and epimerase activity, acting on carbohydrates and derivatives; GO:0036094 small molecule binding; GO:0047918 GDP-mannose 3,5-epimerase activity; GO:0048037 cofactor binding; GO:0050662 coenzyme binding; GO:0051287 NAD bi…	K10046	GME; GDP-D-mannose 3', 5'-epimerase [EC:5.1.3.18 5.1.3.-]	cann00053 Ascorbate and aldarate metabolism; cann00520 Amino sugar and nucleotide sugar metabolism; cann01100 Metabolic pathways; cann01110 Biosynthesis of secondary metabolites
Capana03g004607	48	0.653276	Down	0.0181047	K	"GME1_ORYSJ GDP-mannose 3,5-epimerase 1 OS=Oryza sativa subsp. japonica GN=GME-1 PE=1 SV=1"	GME-1	1	3.7134e-41	179.21	LK(1)TEGHYIIASDWK	2	-3.5186	31		1.38788	1.2379	1.27265	1.39612			0.86531	0.850047	0.889414	0.992481	0.836572	1.11051	1.28039	1.25456	0.800218	0.860571	0.852973	0.847291	0.97604		0.756732	0.834419	0.841682	cytoskeleton	GO:0005975 carbohydrate metabolic process; GO:0005996 monosaccharide metabolic process; GO:0006082 organic acid metabolic process; GO:0006732 coenzyme metabolic process; GO:0006766 vitamin metabolic process; GO:0006767 water-soluble vitamin metabolic process; GO:0008152 metabolic process; GO:0009058 biosynthetic process; GO:0009108 coenzyme biosynthetic process; GO:0009110 vitamin biosynthetic pr…	GO:0005622 intracellular; GO:0005623 cell; GO:0005737 cytoplasm; GO:0005829 cytosol; GO:0044424 intracellular part; GO:0044444 cytoplasmic part; GO:0044464 cell part;	GO:0000166 nucleotide binding; GO:0003824 catalytic activity; GO:0005488 binding; GO:0016853 isomerase activity; GO:0016854 racemase and epimerase activity; GO:0016857 racemase and epimerase activity, acting on carbohydrates and derivatives; GO:0036094 small molecule binding; GO:0047918 GDP-mannose 3,5-epimerase activity; GO:0048037 cofactor binding; GO:0050662 coenzyme binding; GO:0051287 NAD bi…	K10046	GME; GDP-D-mannose 3', 5'-epimerase [EC:5.1.3.18 5.1.3.-]	cann00053 Ascorbate and aldarate metabolism; cann00520 Amino sugar and nucleotide sugar metabolism; cann01100 Metabolic pathways; cann01110 Biosynthesis of secondary metabolites
Capana04g000036	500	0.15296	Down	0.0090839	K	ARID5_ARATH AT-rich interactive domain-containing protein 5 OS=Arabidopsis thaliana GN=ARID5 PE=2 SV=1	ARID5	1	1.49869e-26	192.95	ANEVEHPSK(1)VAR	2	-7.9404	23	1.77134	2.95076	1.37965	0.641577	0.598165	0.784958	0.272401	0.349817		0.773196	0.809972	0.787142	1.02439	1.70573	1.88259	0.684461	0.779176	0.968011	0.540733	0.436179	0.407514	1.04786	1.17016	1.83009	nucleus	GO:0006082 organic acid metabolic process; GO:0006139 nucleobase-containing compound metabolic process; GO:0006351 transcription, DNA-templated; GO:0006355 regulation of transcription, DNA-templated; GO:0006357 regulation of transcription from RNA polymerase II promoter; GO:0006366 transcription from RNA polymerase II promoter; GO:0006725 cellular aromatic compound metabolic process; GO:0006790 s…	GO:0005622 intracellular; GO:0005623 cell; GO:0005634 nucleus; GO:0043226 organelle; GO:0043227 membrane-bounded organelle; GO:0043229 intracellular organelle; GO:0043231 intracellular membrane-bounded organelle; GO:0044424 intracellular part; GO:0044464 cell part;	GO:0000976 transcription regulatory region sequence-specific DNA binding; GO:0000977 RNA polymerase II regulatory region sequence-specific DNA binding; GO:0000981 RNA polymerase II transcription factor activity, sequence-specific DNA binding; GO:0001012 RNA polymerase II regulatory region DNA binding; GO:0001067 regulatory region nucleic acid binding; GO:0001228 transcriptional activator activity…				PF01388	ARID/BRIGHT DNA binding domain
Capana04g000040	30	0.529323	Down	0.0110829	K	DFRA_GERHY Dihydroflavonol-4-reductase OS=Gerbera hybrida GN=DFR PE=2 SV=1	DFR	1	0.000130051	89.382	LLLSK(1)DYIVHGTVR	2	-1.7177	12	1.75818	1.57326	1.38144	1.98605	1.38567			0.755687	0.907407					0.956444	0.761866		0.555368	0.819427	1.07132						chloroplast
Capana04g000213	67	0.563913	Down	0.0075039	K	probable alkaline/neutral invertase B	---	1	5.70278e-05	96.957	QVYK(1)NSENSSR	2	1.7328	17	2.07198	1.9662		1.29054	0.137255		1.28732	1.10526	1.02319	0.815056	0.763178		1.62654	1.12034		0.764933		1.22809	0.834664		1.09848	0.36193		0.166096	chloroplast							PF12899	Alkaline and neutral invertase
Capana04g000276	339	0.599297	Down	0.00090218	K	CYSP1_MAIZE Cysteine proteinase 1 OS=Zea mays GN=CCP1 PE=2 SV=1	CCP1	1	6.83126e-05	153.18	NSWGEHWGEHGYYK(1)ICR	3	-6.5731	15	1.23013	1.30801	1.10103	1.18072	1.43798	1.2845	0.697773	0.716312	0.766864				1.12451	1.06993	1.08127	0.665121	0.771459		0.611173						vacuolar membrane				K01373	CTSF; cathepsin F [EC:3.4.22.41]		PF08246; PF00112	Cathepsin propeptide inhibitor domain (I29); Papain family cysteine protease
Capana04g000783	311	0.56169	Down	2.3187e-05	K	TBA_PRUDU Tubulin alpha chain OS=Prunus dulcis GN=TUBA PE=2 SV=1	TUBA	1	1.07939e-12	132.39	HGK(1)YMACCLMFR	2	-5.5301	20	1.21279	1.19983	1.14674	1.35895	1.31719	1.27543	0.651613	0.654064	0.69358	0.702128	0.836364	0.798206	0.876349	0.944628	0.88664	0.589652	0.549872		0.785595	0.823626					cytoplasm				K07374	TUBA; tubulin alpha	cann04145 Phagosome	PF00091; PF03953	Tubulin/FtsZ family, GTPase domain; Tubulin C-terminal domain
Capana04g001008	62	0.533721	Down	0.000158116	K	protein EXORDIUM-like	---	1	2.08223e-54	232.17	TTEK(1)YYHLANSK	2	-6.1843	24	1.61111	1.65202	1.43337	1.10508	1.37209	1.38372	0.833966	0.820439	0.852217	0.877591	0.964431	0.964583	1.16082	1.37166	1.30405	0.851807	0.912184	0.88961	0.792162	0.720848	0.777526	0.66622	0.650324	0.653655	chloroplast
Capana04g001050	51	1.84993	Up	0.027743	K	14337_SOLLC 14-3-3 protein 7 OS=Solanum lycopersicum GN=TFT7 PE=2 SV=2	TFT7	1	4.01637e-12	145.75	NLVSVGYK(1)NVIGAR	2	1.1393	22	0.542754	0.537465	0.743776	0.936888	0.85461		0.876788	1.06018	1.4373	1.14624	0.9	0.972047	1.30318	0.848089	0.621129	1.31194	1.23568	1.26184	1.02196	0.924103	0.859885		1.06437	1.06667	mitochondria				K06630	YWHAE; 14-3-3 protein epsilon		PF00244	14-3-3 protein
Capana04g001288	6	0.537867	Down	0.0062236	K	ASR1_SOLLC Abscisic stress-ripening protein 1 OS=Solanum lycopersicum GN=ASR1 PE=2 SV=1	ASR1	1	5.59361e-18	130.71	AEEEK(1)HHHHLFHHK	3	-5.2874	31	1.0748	1.10849	1.15286	1.03368	0.995759	1.18783	0.597163	0.477513	0.719728	0.948084	1.02178	0.800246	1.5486	1.33846	1.22581	0.685306	0.880829	0.978428	0.818287	0.966452	0.87931	1.40258	1.1778	0.995475	mitochondria	GO:0001101 response to acid chemical; GO:0006950 response to stress; GO:0009414 response to water deprivation; GO:0009415 response to water; GO:0009628 response to abiotic stimulus; GO:0010035 response to inorganic substance; GO:0042221 response to chemical; GO:0050896 response to stimulus; GO:1901700 response to oxygen-containing compound;	GO:0005622 intracellular; GO:0005623 cell; GO:0005634 nucleus; GO:0032991 macromolecular complex; GO:0043226 organelle; GO:0043227 membrane-bounded organelle; GO:0043229 intracellular organelle; GO:0043231 intracellular membrane-bounded organelle; GO:0044424 intracellular part; GO:0044464 cell part;	GO:0005488 binding; GO:0005515 protein binding; GO:0008270 zinc ion binding; GO:0042802 identical protein binding; GO:0042803 protein homodimerization activity; GO:0043167 ion binding; GO:0043169 cation binding; GO:0046872 metal ion binding; GO:0046914 transition metal ion binding; GO:0046983 protein dimerization activity;
Capana04g001288	54	1.56619	Up	0.0048954	K	ASR1_SOLLC Abscisic stress-ripening protein 1 OS=Solanum lycopersicum GN=ASR1 PE=2 SV=1	ASR1	1	0.000163935	151.08	LGTAAAGAYALHEK(1)HEAK	3	-6.326	21	0.561995	0.624214	0.69684	0.840569	0.833757	0.949735	1.05674	1.00132	0.891156	1.21693	1.09459	1.11985	1.514	1.13539	1.2212	0.819246	0.512953		1.02315		1.12334	1.57629	1.1972		mitochondria	GO:0001101 response to acid chemical; GO:0006950 response to stress; GO:0009414 response to water deprivation; GO:0009415 response to water; GO:0009628 response to abiotic stimulus; GO:0010035 response to inorganic substance; GO:0042221 response to chemical; GO:0050896 response to stimulus; GO:1901700 response to oxygen-containing compound;	GO:0005622 intracellular; GO:0005623 cell; GO:0005634 nucleus; GO:0032991 macromolecular complex; GO:0043226 organelle; GO:0043227 membrane-bounded organelle; GO:0043229 intracellular organelle; GO:0043231 intracellular membrane-bounded organelle; GO:0044424 intracellular part; GO:0044464 cell part;	GO:0005488 binding; GO:0005515 protein binding; GO:0008270 zinc ion binding; GO:0042802 identical protein binding; GO:0042803 protein homodimerization activity; GO:0043167 ion binding; GO:0043169 cation binding; GO:0046872 metal ion binding; GO:0046914 transition metal ion binding; GO:0046983 protein dimerization activity;
Capana04g001289	144	1.55642	Up	0.00058127	K	ASR2_SOLLC Abscisic stress-ripening protein 2 OS=Solanum lycopersicum GN=ASR2 PE=4 SV=1	ASR2	1	3.2204e-126	217.2	YGEK(1)TSTYGENTYGEK	2	-3.5867	23	0.755837		0.761622	0.51927	0.756699	0.436649	1.18587	1.22297	1.13386	1.52888	1.4297	1.68456	0.379541	0.852941	0.796332	0.606029	0.394984	0.545455	1.32166	1.21517	1.29428	1.42222	1.31329	1.19679	nucleus
Capana04g001331	25	0.625993	Down	0.0006625	K	"F16P2_SOLTU Fructose-1,6-bisphosphatase, cytosolic OS=Solanum tuberosum PE=2 SV=1"	---	1	8.83364e-92	232.19	FVLNEQTK(1)HPESR	3	3.7586	78	1.14315	1.32558	1.2444	1.2379	1.30071	1.10345	0.776094	0.743026	0.805272	0.867906	1.00619	0.906475	1.08232	1.23092	1.20888	0.928355	0.963228	0.965482	0.880395	0.879562	0.826291	0.913826	0.89597	0.877495	chloroplast	GO:0000272 polysaccharide catabolic process; GO:0001101 response to acid chemical; GO:0005975 carbohydrate metabolic process; GO:0005976 polysaccharide metabolic process; GO:0005982 starch metabolic process; GO:0005983 starch catabolic process; GO:0005984 disaccharide metabolic process; GO:0005985 sucrose metabolic process; GO:0005986 sucrose biosynthetic process; GO:0005996 monosaccharide metabo…	GO:0005622 intracellular; GO:0005623 cell; GO:0005634 nucleus; GO:0005737 cytoplasm; GO:0005829 cytosol; GO:0043226 organelle; GO:0043227 membrane-bounded organelle; GO:0043229 intracellular organelle; GO:0043231 intracellular membrane-bounded organelle; GO:0044424 intracellular part; GO:0044444 cytoplasmic part; GO:0044464 cell part;	GO:0003824 catalytic activity; GO:0016787 hydrolase activity; GO:0016788 hydrolase activity, acting on ester bonds; GO:0016791 phosphatase activity; GO:0019203 carbohydrate phosphatase activity; GO:0042132 fructose 1,6-bisphosphate 1-phosphatase activity; GO:0042578 phosphoric ester hydrolase activity; GO:0050308 sugar-phosphatase activity;	K03841	FBP, fbp; fructose-1,6-bisphosphatase I [EC:3.1.3.11]	cann00010 Glycolysis / Gluconeogenesis; cann00030 Pentose phosphate pathway; cann00051 Fructose and mannose metabolism; cann00710 Carbon fixation in photosynthetic organisms; cann01100 Metabolic pathways; cann01110 Biosynthesis of secondary metabolites; cann01200 Carbon metabolism	PF00316	Fructose-1-6-bisphosphatase
Capana04g001331	212	0.625897	Down	0.048696	K	"F16P2_SOLTU Fructose-1,6-bisphosphatase, cytosolic OS=Solanum tuberosum PE=2 SV=1"	---	1	1.2316e-152	252.75	NWDGPTTK(1)YVQSCK(1)YPTDGSSPK	3	4.3303	44	1.16155	1.40063	1.278	1.4243	1.35822	1.49797	0.957071	0.56044	0.886054	0.928571	0.767802	0.941418	1.30589	1.17871	1.28759	0.917255	0.88049	0.863959	0.84217	0.716545	0.717136	0.713068	0.812559	0.69873	chloroplast	GO:0000272 polysaccharide catabolic process; GO:0001101 response to acid chemical; GO:0005975 carbohydrate metabolic process; GO:0005976 polysaccharide metabolic process; GO:0005982 starch metabolic process; GO:0005983 starch catabolic process; GO:0005984 disaccharide metabolic process; GO:0005985 sucrose metabolic process; GO:0005986 sucrose biosynthetic process; GO:0005996 monosaccharide metabo…	GO:0005622 intracellular; GO:0005623 cell; GO:0005634 nucleus; GO:0005737 cytoplasm; GO:0005829 cytosol; GO:0043226 organelle; GO:0043227 membrane-bounded organelle; GO:0043229 intracellular organelle; GO:0043231 intracellular membrane-bounded organelle; GO:0044424 intracellular part; GO:0044444 cytoplasmic part; GO:0044464 cell part;	GO:0003824 catalytic activity; GO:0016787 hydrolase activity; GO:0016788 hydrolase activity, acting on ester bonds; GO:0016791 phosphatase activity; GO:0019203 carbohydrate phosphatase activity; GO:0042132 fructose 1,6-bisphosphate 1-phosphatase activity; GO:0042578 phosphoric ester hydrolase activity; GO:0050308 sugar-phosphatase activity;	K03841	FBP, fbp; fructose-1,6-bisphosphatase I [EC:3.1.3.11]	cann00010 Glycolysis / Gluconeogenesis; cann00030 Pentose phosphate pathway; cann00051 Fructose and mannose metabolism; cann00710 Carbon fixation in photosynthetic organisms; cann01100 Metabolic pathways; cann01110 Biosynthesis of secondary metabolites; cann01200 Carbon metabolism	PF00316	Fructose-1-6-bisphosphatase
Capana04g001331	227	0.600051	Down	2.2328e-07	K	"F16P2_SOLTU Fructose-1,6-bisphosphatase, cytosolic OS=Solanum tuberosum PE=2 SV=1"	---	1	3.19382e-26	172.1	YPTDGSSPK(1)SLR	2	-6.2127	24	1.409	1.39746	1.43483	1.67456	1.62462	1.63996	0.843434	0.852916	0.848639	0.758317	0.823529	0.845838	1.29065	1.26707	1.34813	0.861756	0.923391	0.822335	0.762022	0.737226	0.679577	0.430871	0.472352	0.394737	chloroplast	GO:0000272 polysaccharide catabolic process; GO:0001101 response to acid chemical; GO:0005975 carbohydrate metabolic process; GO:0005976 polysaccharide metabolic process; GO:0005982 starch metabolic process; GO:0005983 starch catabolic process; GO:0005984 disaccharide metabolic process; GO:0005985 sucrose metabolic process; GO:0005986 sucrose biosynthetic process; GO:0005996 monosaccharide metabo…	GO:0005622 intracellular; GO:0005623 cell; GO:0005634 nucleus; GO:0005737 cytoplasm; GO:0005829 cytosol; GO:0043226 organelle; GO:0043227 membrane-bounded organelle; GO:0043229 intracellular organelle; GO:0043231 intracellular membrane-bounded organelle; GO:0044424 intracellular part; GO:0044444 cytoplasmic part; GO:0044464 cell part;	GO:0003824 catalytic activity; GO:0016787 hydrolase activity; GO:0016788 hydrolase activity, acting on ester bonds; GO:0016791 phosphatase activity; GO:0019203 carbohydrate phosphatase activity; GO:0042132 fructose 1,6-bisphosphate 1-phosphatase activity; GO:0042578 phosphoric ester hydrolase activity; GO:0050308 sugar-phosphatase activity;	K03841	FBP, fbp; fructose-1,6-bisphosphatase I [EC:3.1.3.11]	cann00010 Glycolysis / Gluconeogenesis; cann00030 Pentose phosphate pathway; cann00051 Fructose and mannose metabolism; cann00710 Carbon fixation in photosynthetic organisms; cann01100 Metabolic pathways; cann01110 Biosynthesis of secondary metabolites; cann01200 Carbon metabolism	PF00316	Fructose-1-6-bisphosphatase
Capana04g001331	218	0.518119	Down	0.00046184	K	"F16P2_SOLTU Fructose-1,6-bisphosphatase, cytosolic OS=Solanum tuberosum PE=2 SV=1"	---	1	1.56089e-16	172.92	YVQSCK(1)YPTDGSSPK	2	3.5713	45	1.53272	1.59408	1.44399	1.62925	1.60545	1.62779	0.73569	0.879121	0.753401	0.739726	0.753354	0.802672	1.3313	1.31827	1.36731	0.864783	0.789581	0.782741	0.688039	0.742092	0.719484	0.495265	0.504217	0.462795	chloroplast	GO:0000272 polysaccharide catabolic process; GO:0001101 response to acid chemical; GO:0005975 carbohydrate metabolic process; GO:0005976 polysaccharide metabolic process; GO:0005982 starch metabolic process; GO:0005983 starch catabolic process; GO:0005984 disaccharide metabolic process; GO:0005985 sucrose metabolic process; GO:0005986 sucrose biosynthetic process; GO:0005996 monosaccharide metabo…	GO:0005622 intracellular; GO:0005623 cell; GO:0005634 nucleus; GO:0005737 cytoplasm; GO:0005829 cytosol; GO:0043226 organelle; GO:0043227 membrane-bounded organelle; GO:0043229 intracellular organelle; GO:0043231 intracellular membrane-bounded organelle; GO:0044424 intracellular part; GO:0044444 cytoplasmic part; GO:0044464 cell part;	GO:0003824 catalytic activity; GO:0016787 hydrolase activity; GO:0016788 hydrolase activity, acting on ester bonds; GO:0016791 phosphatase activity; GO:0019203 carbohydrate phosphatase activity; GO:0042132 fructose 1,6-bisphosphate 1-phosphatase activity; GO:0042578 phosphoric ester hydrolase activity; GO:0050308 sugar-phosphatase activity;	K03841	FBP, fbp; fructose-1,6-bisphosphatase I [EC:3.1.3.11]	cann00010 Glycolysis / Gluconeogenesis; cann00030 Pentose phosphate pathway; cann00051 Fructose and mannose metabolism; cann00710 Carbon fixation in photosynthetic organisms; cann01100 Metabolic pathways; cann01110 Biosynthesis of secondary metabolites; cann01200 Carbon metabolism	PF00316	Fructose-1-6-bisphosphatase
Capana04g001609	433	2.38109	Up	0.00195876	K	ODP2_ZYMMO Dihydrolipoyllysine-residue acetyltransferase component of pyruvate dehydrogenase complex OS=Zymomonas mobilis (strain ATCC 31821 / ZM4 / CP4) GN=pdhC PE=3 SV=2	pdhC	1	0.000267507	126.48	IGVK(1)NQMQVNVTADHR	3	-8.0668	21	0.775728	0.809917	0.883047		0.940439	0.869	1.94898	1.94785	1.98135	1.0628	1.06565	1.1943	0.803785	0.777884	0.819471	0.550978			0.815713	0.824742	0.823814	0.775908	0.842197	0.803433	chloroplast		GO:0005622 intracellular; GO:0005623 cell; GO:0005737 cytoplasm; GO:0005829 cytosol; GO:0005840 ribosome; GO:0005886 plasma membrane; GO:0009507 chloroplast; GO:0009526 plastid envelope; GO:0009536 plastid; GO:0009941 chloroplast envelope; GO:0016020 membrane; GO:0022626 cytosolic ribosome; GO:0031967 organelle envelope; GO:0031975 envelope; GO:0032991 macromolecular complex; GO:0043226 organelle…	GO:0005488 binding; GO:0005515 protein binding; GO:0019904 protein domain specific binding;	K00627	DLAT, aceF, pdhC; pyruvate dehydrogenase E2 component (dihydrolipoamide acetyltransferase) [EC:2.3.1.12]	cann00010 Glycolysis / Gluconeogenesis; cann00020 Citrate cycle (TCA cycle); cann00620 Pyruvate metabolism; cann01100 Metabolic pathways; cann01110 Biosynthesis of secondary metabolites; cann01200 Carbon metabolism	PF00364; PF00198	Biotin-requiring enzyme; 2-oxoacid dehydrogenases acyltransferase (catalytic domain)
Capana04g001638	131	0.549269	Down	0.0041031	K	"TRL4_ARATH Thioredoxin-like 4, chloroplastic OS=Arabidopsis thaliana GN=At1g07700 PE=2 SV=1"	At1g07700	1	1.60276e-06	123.92	TACGSCK(1)YIEQGFAK	2	4.9141	17	1.85854	1.7393		1.08395				1.00741	0.968777			0.82879	0.992813	1.04708	1.06826	0.964894		0.729843	0.768872	0.655665					chloroplast	GO:0006950 response to stress; GO:0006979 response to oxidative stress; GO:0008152 metabolic process; GO:0009636 response to toxic substance; GO:0009987 cellular process; GO:0019725 cellular homeostasis; GO:0033554 cellular response to stress; GO:0034599 cellular response to oxidative stress; GO:0042221 response to chemical; GO:0042592 homeostatic process; GO:0045454 cell redox homeostasis; GO:00…	GO:0005622 intracellular; GO:0005623 cell; GO:0005737 cytoplasm; GO:0009507 chloroplast; GO:0009532 plastid stroma; GO:0009536 plastid; GO:0009570 chloroplast stroma; GO:0043226 organelle; GO:0043227 membrane-bounded organelle; GO:0043229 intracellular organelle; GO:0043231 intracellular membrane-bounded organelle; GO:0044422 organelle part; GO:0044424 intracellular part; GO:0044434 chloroplast p…	GO:0003824 catalytic activity; GO:0004791 thioredoxin-disulfide reductase activity; GO:0015035 protein disulfide oxidoreductase activity; GO:0015036 disulfide oxidoreductase activity; GO:0016209 antioxidant activity; GO:0016491 oxidoreductase activity; GO:0016651 oxidoreductase activity, acting on NAD(P)H; GO:0016667 oxidoreductase activity, acting on a sulfur group of donors; GO:0016668 oxidored…				PF00085	Thioredoxin
Capana04g001731	383	1.75606	Up	0.0122387	K	"PHSL1_SOLTU Alpha-1,4 glucan phosphorylase L-1 isozyme, chloroplastic/amyloplastic OS=Solanum tuberosum PE=1 SV=2"	---	1	0.002511	117.3	IK(1)WEEFPEK	2	-8.7196	21	0.691562	0.630124	0.676301	1.07778	1.04853	1.08506	0.914829	1.19941	1.39436	1.00227	0.653524		1.34134	0.875399	0.830769	1.11872	0.900474	0.959449	1.04061	0.635303	0.589865	0.992167			chloroplast	GO:0000272 polysaccharide catabolic process; GO:0001101 response to acid chemical; GO:0005975 carbohydrate metabolic process; GO:0005976 polysaccharide metabolic process; GO:0005977 glycogen metabolic process; GO:0005980 glycogen catabolic process; GO:0006073 cellular glucan metabolic process; GO:0006091 generation of precursor metabolites and energy; GO:0006112 energy reserve metabolic process; …	GO:0005622 intracellular; GO:0005623 cell; GO:0005737 cytoplasm; GO:0009501 amyloplast; GO:0009507 chloroplast; GO:0009532 plastid stroma; GO:0009536 plastid; GO:0009570 chloroplast stroma; GO:0043226 organelle; GO:0043227 membrane-bounded organelle; GO:0043229 intracellular organelle; GO:0043231 intracellular membrane-bounded organelle; GO:0044422 organelle part; GO:0044424 intracellular part; G…	GO:0003824 catalytic activity; GO:0004645 phosphorylase activity; GO:0005488 binding; GO:0005515 protein binding; GO:0008144 drug binding; GO:0008184 glycogen phosphorylase activity; GO:0016740 transferase activity; GO:0016757 transferase activity, transferring glycosyl groups; GO:0016758 transferase activity, transferring hexosyl groups; GO:0019842 vitamin binding; GO:0030170 pyridoxal phosphate…	K00688	PYG, glgP; glycogen phosphorylase [EC:2.4.1.1]	cann00500 Starch and sucrose metabolism; cann01100 Metabolic pathways; cann01110 Biosynthesis of secondary metabolites
Capana04g002111	95	0.604168	Down	0.00020294	K	"APXT_ARATH L-ascorbate peroxidase T, chloroplastic OS=Arabidopsis thaliana GN=APXT PE=2 SV=2"	APXT	1	1.08519e-46	189.56	EMLK(1)TTFCHPILVR	2	-1.4557	23	1.30255	1.40526	1.36472	1.56541	1.57126	1.64202	0.860396	0.771203	0.828897	0.521191	0.736318	0.722222	1.12739	1.37288	1.42647	0.678428	0.755085	0.884342	0.855341	1.06119	1.048	0.388339	0.345691		chloroplast	GO:0000302 response to reactive oxygen species; GO:0006950 response to stress; GO:0006979 response to oxidative stress; GO:0007154 cell communication; GO:0007165 signal transduction; GO:0008152 metabolic process; GO:0009056 catabolic process; GO:0009266 response to temperature stimulus; GO:0009409 response to cold; GO:0009628 response to abiotic stimulus; GO:0009631 cold acclimation; GO:0009636 r…	GO:0005622 intracellular; GO:0005623 cell; GO:0005737 cytoplasm; GO:0005739 mitochondrion; GO:0009507 chloroplast; GO:0009532 plastid stroma; GO:0009534 chloroplast thylakoid; GO:0009535 chloroplast thylakoid membrane; GO:0009536 plastid; GO:0009570 chloroplast stroma; GO:0009579 thylakoid; GO:0016020 membrane; GO:0031976 plastid thylakoid; GO:0031984 organelle subcompartment; GO:0034357 photosyn…	GO:0003824 catalytic activity; GO:0004130 cytochrome-c peroxidase activity; GO:0004601 peroxidase activity; GO:0016209 antioxidant activity; GO:0016491 oxidoreductase activity; GO:0016684 oxidoreductase activity, acting on peroxide as acceptor;	K00434	E1.11.1.11; L-ascorbate peroxidase [EC:1.11.1.11]	cann00053 Ascorbate and aldarate metabolism; cann00480 Glutathione metabolism; cann01100 Metabolic pathways	PF00141	Peroxidase
Capana04g002111	314	1.84652	Up	0.030458	K	"APXT_ARATH L-ascorbate peroxidase T, chloroplastic OS=Arabidopsis thaliana GN=APXT PE=2 SV=2"	APXT	1	5.30577e-05	117.21	EYAEK(1)YATNQDVFLR	2	2.692	20	0.69057	0.602105		0.685144			1.09208	1.29487			1.34453	1.4154	1.10632		0.803922			1.29715			1.12622	0.836084	1.03206		chloroplast	GO:0000302 response to reactive oxygen species; GO:0006950 response to stress; GO:0006979 response to oxidative stress; GO:0007154 cell communication; GO:0007165 signal transduction; GO:0008152 metabolic process; GO:0009056 catabolic process; GO:0009266 response to temperature stimulus; GO:0009409 response to cold; GO:0009628 response to abiotic stimulus; GO:0009631 cold acclimation; GO:0009636 r…	GO:0005622 intracellular; GO:0005623 cell; GO:0005737 cytoplasm; GO:0005739 mitochondrion; GO:0009507 chloroplast; GO:0009532 plastid stroma; GO:0009534 chloroplast thylakoid; GO:0009535 chloroplast thylakoid membrane; GO:0009536 plastid; GO:0009570 chloroplast stroma; GO:0009579 thylakoid; GO:0016020 membrane; GO:0031976 plastid thylakoid; GO:0031984 organelle subcompartment; GO:0034357 photosyn…	GO:0003824 catalytic activity; GO:0004130 cytochrome-c peroxidase activity; GO:0004601 peroxidase activity; GO:0016209 antioxidant activity; GO:0016491 oxidoreductase activity; GO:0016684 oxidoreductase activity, acting on peroxide as acceptor;	K00434	E1.11.1.11; L-ascorbate peroxidase [EC:1.11.1.11]	cann00053 Ascorbate and aldarate metabolism; cann00480 Glutathione metabolism; cann01100 Metabolic pathways	PF00141	Peroxidase
Capana04g002355	509	0.595373	Down	0.00021755	K	VP35B_ARATH Vacuolar protein sorting-associated protein 35B OS=Arabidopsis thaliana GN=VPS35B PE=1 SV=1	VPS35B	1	6.49034e-05	115.35	IICTVNK(1)HIVTGGPK	2	-3.8715	20	1.40401	1.49786	1.3994	1.33577	1.4271	1.69091	0.905952	0.849522	0.805389	0.912742	0.898053	0.852732	1.00637	1.08684		0.813627	0.74359	0.726325	0.746172	0.76022	0.726437				cytoplasm	GO:0006810 transport; GO:0006886 intracellular protein transport; GO:0008104 protein localization; GO:0015031 protein transport; GO:0015833 peptide transport; GO:0016192 vesicle-mediated transport; GO:0016197 endosomal transport; GO:0016482 cytosolic transport; GO:0033036 macromolecule localization; GO:0034613 cellular protein localization; GO:0042147 retrograde transport, endosome to Golgi; GO:0…	GO:0005622 intracellular; GO:0005623 cell; GO:0005737 cytoplasm; GO:0005768 endosome; GO:0005770 late endosome; GO:0005771 multivesicular body; GO:0010008 endosome membrane; GO:0012505 endomembrane system; GO:0016020 membrane; GO:0030904 retromer complex; GO:0031090 organelle membrane; GO:0031410 cytoplasmic vesicle; GO:0031982 vesicle; GO:0032991 macromolecular complex; GO:0043226 organelle; GO:…	GO:0005215 transporter activity; GO:0008565 protein transporter activity;	K18468	VPS35; vacuolar protein sorting-associated protein 35	cann04144 Endocytosis
Capana04g002820	43	2.97503	Up	6.0248e-05	K	"CB2G_SOLLC Chlorophyll a-b binding protein 3C, chloroplastic OS=Solanum lycopersicum GN=CAB3C PE=3 SV=1"	CAB3C	1	1.05364e-54	205.26	AK(1)PVSSGSPWYGPDR	2	-7.4354	24	0.362832	0.395604	0.393562	0.63786	0.587185	0.547468	1.0249	1.23263	1.1697	1.10134	0.798137	1.35684	0.866532	0.661494	0.524378	1.24038	1.1761	1.14596	1.5641	1.33051	1.00843	1.45883	1.50752	1.56637	chloroplast				K08912	LHCB1; light-harvesting complex II chlorophyll a/b binding protein 1	cann00196 Photosynthesis - antenna proteins; cann01100 Metabolic pathways
Capana04g002829	129	0.489467	Down	0.0025605	K	RB27C_DROME Heterogeneous nuclear ribonucleoprotein 27C OS=Drosophila melanogaster GN=Hrb27C PE=1 SV=2	Hrb27C	1	0.00124865	93.162	EEQGPK(1)SGNVGSAR	2	-0.61453	15		1.39373	1.41134		1.30647	1.36929		0.66199	0.710997	0.727273	0.997543	1.04377			1.37292	0.501767		0.793434				0.674847		0.974599	nucleus	GO:0000003 reproduction; GO:0003006 developmental process involved in reproduction; GO:0006139 nucleobase-containing compound metabolic process; GO:0006378 mRNA polyadenylation; GO:0006379 mRNA cleavage; GO:0006396 RNA processing; GO:0006397 mRNA processing; GO:0006725 cellular aromatic compound metabolic process; GO:0006807 nitrogen compound metabolic process; GO:0007275 multicellular organism d…	GO:0005622 intracellular; GO:0005623 cell; GO:0005634 nucleus; GO:0005654 nucleoplasm; GO:0005737 cytoplasm; GO:0005829 cytosol; GO:0005849 mRNA cleavage factor complex; GO:0031974 membrane-enclosed lumen; GO:0031981 nuclear lumen; GO:0032991 macromolecular complex; GO:0043226 organelle; GO:0043227 membrane-bounded organelle; GO:0043229 intracellular organelle; GO:0043231 intracellular membrane-b…	GO:0003676 nucleic acid binding; GO:0003723 RNA binding; GO:0003729 mRNA binding; GO:0003730 mRNA 3'-UTR binding; GO:0005488 binding; GO:0097159 organic cyclic compound binding; GO:1901363 heterocyclic compound binding;	K14411	MSI; RNA-binding protein Musashi	cann03015 mRNA surveillance pathway	PF00076	RNA recognition motif. (a.k.a. RRM, RBD, or RNP domain)
Capana05g000093	99	1.58037	Up	0.0093989	K	VILI2_ARATH Villin-2 OS=Arabidopsis thaliana GN=VLN2 PE=1 SV=2	VLN2	1	1.03558e-16	70.249	VIQGYETHSFK(1)SNFDSWPSGSAPAPEEGR	3	1.7614	9	0.853333	0.932482		0.830948	0.951287			1.41981	1.40243			0.874749	0.784158			0.395036									nucleus	GO:0001558 regulation of cell growth; GO:0006996 organelle organization; GO:0007010 cytoskeleton organization; GO:0007015 actin filament organization; GO:0008064 regulation of actin polymerization or depolymerization; GO:0009605 response to external stimulus; GO:0009606 tropism; GO:0009628 response to abiotic stimulus; GO:0009629 response to gravity; GO:0009630 gravitropism; GO:0009987 cellular p…	GO:0005622 intracellular; GO:0005623 cell; GO:0005856 cytoskeleton; GO:0015629 actin cytoskeleton; GO:0032432 actin filament bundle; GO:0043226 organelle; GO:0043228 non-membrane-bounded organelle; GO:0043229 intracellular organelle; GO:0043232 intracellular non-membrane-bounded organelle; GO:0044422 organelle part; GO:0044424 intracellular part; GO:0044430 cytoskeletal part; GO:0044446 intracell…	GO:0003779 actin binding; GO:0005488 binding; GO:0005515 protein binding; GO:0008092 cytoskeletal protein binding; GO:0044877 macromolecular complex binding; GO:0051015 actin filament binding;	K05768	GSN; gelsolin		PF00626; PF02209	Gelsolin repeat; Villin headpiece domain
Capana05g000123	926	0.640812	Down	0.0144176	K	"PXM16_ARATH Zinc-metallopeptidase, peroxisomal OS=Arabidopsis thaliana GN=PXM16 PE=2 SV=1"	PXM16	1	0.00126576	76.255	VYGSK(1)HSSEFQAHK	3	-7.6173	11	1.27265	1.24003	1.20412			0.973684	0.884796		0.70305			0.71161	0.866117			0.450304			0.725681		0.60214				cytoplasm				K01408	IDE, ide; insulysin [EC:3.4.24.56]		PF05193	Peptidase M16 inactive domain
Capana05g000543	112	0.662193	Down	2.4623e-05	K	"RK10_TOBAC 50S ribosomal protein L10, chloroplastic OS=Nicotiana tabacum GN=RPL10 PE=2 SV=1"	RPL10	1	8.14276e-63	179.98	AIEGTK(1)WEALRPCMK	2	-3.2261	25	1.52855	1.50911	1.49227	1.65101	1.55161	1.35168	0.989848	0.974464	1.03538	0.924028	0.912968	0.945502			1.12559	0.686517	0.683157	0.701373	0.846239	0.819599	0.836084	0.629734	0.641434		chloroplast				K02864	RP-L10, MRPL10, rplJ; large subunit ribosomal protein L10	cann03010 Ribosome
Capana05g000554	181	0.574547	Down	0.0092997	K	"SYGM1_ARATH Glycine--tRNA ligase 1, mitochondrial OS=Arabidopsis thaliana GN=GLYRS-1 PE=2 SV=1"	GLYRS-1	1	0.000157842	104.39	ADHLLK(1)DYCK	2	-7.3969	11	1.24866	1.41571	1.12929	1.01966			0.691057		0.762035		0.879576	0.925075			0.976908				0.519231		0.710227				cytoplasm				K01880	GARS, glyS1; glycyl-tRNA synthetase [EC:6.1.1.14]	cann00970 Aminoacyl-tRNA biosynthesis	PF00458; PF00587; PF03129	WHEP-TRS domain; tRNA synthetase class II core domain (G, H, P, S and T); Anticodon binding domain
Capana05g000857	283	0.604679	Down	0.00094246	K	GLNA_NICPL Glutamine synthetase OS=Nicotiana plumbaginifolia PE=2 SV=1	---	1	6.5868e-101	256.7	RLTGK(1)HETANINSFK	3	2.0354	93	1.13721	1.375	1.29001	1.65498	1.63987	1.21792	0.753747	0.759582	0.785795	0.874272	0.943936	0.686073	1.02266	1.29634	1.17317		1.23961	0.851126	0.897351		0.775	0.701493	0.742857	0.805292	cytoplasm				K01915	glnA, GLUL; glutamine synthetase [EC:6.3.1.2]	cann00220 Arginine biosynthesis; cann00250 Alanine, aspartate and glutamate metabolism; cann00630 Glyoxylate and dicarboxylate metabolism; cann00910 Nitrogen metabolism; cann01100 Metabolic pathways; cann01230 Biosynthesis of amino acids	PF03951; PF00120	Glutamine synthetase, beta-Grasp domain; Glutamine synthetase, catalytic domain
Capana05g000871	133	0.398056	Down	0.0084043	K	RRAA2_ARATH Regulator of ribonuclease-like protein 2 OS=Arabidopsis thaliana GN=At5g16450 PE=2 SV=1	At5g16450	1	5.45127e-24	177.41	GIGEK(1)HVPITIAGTR	2	-5.0243	31	1.83525		1.46122	1.54	1.27062	1.42112	0.77044	0.555676	0.642151		0.870337	0.779944	0.880457	1.34265	1.16957	1.04033	0.844444	0.928274	0.766019	0.955869	0.929254	0.909591	0.991156	0.861548	cytoplasm
Capana05g000935	82	1.61296	Up	0.00126275	K	HMGYA_SOYBN HMG-Y-related protein A OS=Glycine max PE=2 SV=1	---	0.999999	4.2723e-108	202.52	QTGQLVLVK(1)NNYVKPDPNAPPR	3	-1.9217	24	0.924155	0.996165	1.08159	1.07808	1.26894	1.10252	1.72472	1.6041	1.51314	0.913191	0.890038	0.981447	1.08647	0.96827	0.942639	0.90566	0.945922	1.15592	0.887762	0.891871	0.952932	0.825	0.477707	0.601997	nucleus		GO:0005622 intracellular; GO:0005623 cell; GO:0005634 nucleus; GO:0005730 nucleolus; GO:0031974 membrane-enclosed lumen; GO:0031981 nuclear lumen; GO:0043226 organelle; GO:0043227 membrane-bounded organelle; GO:0043228 non-membrane-bounded organelle; GO:0043229 intracellular organelle; GO:0043231 intracellular membrane-bounded organelle; GO:0043232 intracellular non-membrane-bounded organelle; GO…	GO:0003676 nucleic acid binding; GO:0003677 DNA binding; GO:0005488 binding; GO:0097159 organic cyclic compound binding; GO:1901363 heterocyclic compound binding;				PF00538	linker histone H1 and H5 family
Capana05g001001	400	1.6526	Up	0.0031825	K	"TKTC_SOLTU Transketolase, chloroplastic OS=Solanum tuberosum PE=2 SV=1"	---	1	0.00074585	99.34	K(1)YPEEAADLK	2	-7.4877	23	0.687264	0.892774	0.729821	0.631757	1.12829	1.15353	1.26284	1.3067	1.24772	1.11843	0.777778	1.16732	1.2894	1.07101	0.980751	1.17174		0.894527	0.927835	0.417172	0.879208	0.880558	1.08326	1.02894	mitochondria		GO:0005622 intracellular; GO:0005623 cell; GO:0005737 cytoplasm; GO:0009507 chloroplast; GO:0009534 chloroplast thylakoid; GO:0009535 chloroplast thylakoid membrane; GO:0009536 plastid; GO:0009579 thylakoid; GO:0016020 membrane; GO:0031976 plastid thylakoid; GO:0031984 organelle subcompartment; GO:0034357 photosynthetic membrane; GO:0042651 thylakoid membrane; GO:0043226 organelle; GO:0043227 mem…	GO:0003824 catalytic activity; GO:0004802 transketolase activity; GO:0016740 transferase activity; GO:0016744 transferase activity, transferring aldehyde or ketonic groups;	K00615	E2.2.1.1, tktA, tktB; transketolase [EC:2.2.1.1]	cann00030 Pentose phosphate pathway; cann00710 Carbon fixation in photosynthetic organisms; cann01100 Metabolic pathways; cann01110 Biosynthesis of secondary metabolites; cann01200 Carbon metabolism; cann01230 Biosynthesis of amino acids	PF00456; PF02779; PF02780	Transketolase, thiamine diphosphate binding domain; Transketolase, pyrimidine binding domain; Transketolase, C-terminal domain
Capana05g001718	70	3.00819	Up	0.0072843	K	HMGYA_SOYBN HMG-Y-related protein A OS=Glycine max PE=2 SV=1	---	0.999994	8.91878e-10	134.49	ANGDLIFLK(1)NNYIKPGPDVPAK	3	-2.6678	36	0.455249	0.57721	0.68869		0.868026	0.885384	2.16952	1.82014	1.18788	1.24087	0.878676	1.08566	1.33712		0.985112	0.928339	1.04912	1	1.04753	1.09869	1.0498		0.500444	0.573181	nucleus	GO:0048580 regulation of post-embryonic development; GO:0050789 regulation of biological process; GO:0050793 regulation of developmental process; GO:0051239 regulation of multicellular organismal process; GO:0065007 biological regulation; GO:0080050 regulation of seed development; GO:2000014 regulation of endosperm development; GO:2000026 regulation of multicellular organismal development; GO:200…	GO:0005622 intracellular; GO:0005623 cell; GO:0005634 nucleus; GO:0005730 nucleolus; GO:0031974 membrane-enclosed lumen; GO:0031981 nuclear lumen; GO:0043226 organelle; GO:0043227 membrane-bounded organelle; GO:0043228 non-membrane-bounded organelle; GO:0043229 intracellular organelle; GO:0043231 intracellular membrane-bounded organelle; GO:0043232 intracellular non-membrane-bounded organelle; GO…	GO:0003676 nucleic acid binding; GO:0003677 DNA binding; GO:0005488 binding; GO:0043565 sequence-specific DNA binding; GO:0097159 organic cyclic compound binding; GO:1901363 heterocyclic compound binding;				PF00538	linker histone H1 and H5 family
Capana05g001834	9	0.627696	Down	0.0142409	K	"MSRB2_ARATH Peptide methionine sulfoxide reductase B2, chloroplastic OS=Arabidopsis thaliana GN=MSRB2 PE=1 SV=1"	MSRB2	1	3.15898e-24	123.99	ATPGSVHK(1)SEEEWR	2	-4.9197	42	1.18236	1.38658	1.32005	1.11135	1.3486	1.27803	0.740125	0.88728		0.802456	1.10632	0.988636		1.1635	1.36674	0.717143	0.833962	0.891221		0.891522	0.709302	1.05412	0.879001	0.767829	chloroplast				K07305	msrB; peptide-methionine (R)-S-oxide reductase [EC:1.8.4.12]
Capana05g001871	62	0.574571	Down	0.000141477	K	RBL_DEPGR Ribulose bisphosphate carboxylase large chain (Fragment) OS=Deppea grandiflora GN=rbcL PE=3 SV=1	rbcL	1	3.03968e-69	237.89	PLLGCTIK(1)PK(1)LGLSAK	2	0.0063662	202	1.34067	1.41702	1.38025	1.71058	1.63415	1.58892	0.815584	0.737213	0.824742	0.733075	0.808851	0.811567	1.14876	1.22735	1.25257	1.07948	1.05613	1.01316	0.703176	0.732877	0.739837	0.369697	0.373206	0.346405	chloroplast	GO:0001101 response to acid chemical; GO:0009719 response to endogenous stimulus; GO:0009725 response to hormone; GO:0009737 response to abscisic acid; GO:0010033 response to organic substance; GO:0010035 response to inorganic substance; GO:0010038 response to metal ion; GO:0033993 response to lipid; GO:0042221 response to chemical; GO:0046686 response to cadmium ion; GO:0050896 response to stimu…	GO:0000312 plastid small ribosomal subunit; GO:0000313 organellar ribosome; GO:0000314 organellar small ribosomal subunit; GO:0005576 extracellular region; GO:0005618 cell wall; GO:0005622 intracellular; GO:0005623 cell; GO:0005737 cytoplasm; GO:0005829 cytosol; GO:0005840 ribosome; GO:0009507 chloroplast; GO:0009526 plastid envelope; GO:0009532 plastid stroma; GO:0009534 chloroplast thylakoid; G…		K01601	rbcL; ribulose-bisphosphate carboxylase large chain [EC:4.1.1.39]	cann00630 Glyoxylate and dicarboxylate metabolism; cann00710 Carbon fixation in photosynthetic organisms; cann01100 Metabolic pathways; cann01110 Biosynthesis of secondary metabolites; cann01200 Carbon metabolism	PF02788; PF00016	Ribulose bisphosphate carboxylase large chain, N-terminal domain; Ribulose bisphosphate carboxylase large chain, catalytic domain
Capana05g002269	94	0.604736	Down	0.0027368	K	SYM_ARATH Probable methionine--tRNA ligase OS=Arabidopsis thaliana GN=At4g13780 PE=2 SV=1	At4g13780	1	0.000215996	124.81	YHAIHK(1)DVYK	2	-6.6809	26	1.24199	1.46045	1.43738	1.15702	1.30743	1.39594	0.84855	0.748359	0.906593	0.645756	0.728793	0.845588	1.19628	1.17337	1.24407	0.661221	0.84593	1.00404	0.861254	1.04952	0.875912	0.707746	0.657471	0.544847	chloroplast	GO:0006082 organic acid metabolic process; GO:0006139 nucleobase-containing compound metabolic process; GO:0006399 tRNA metabolic process; GO:0006412 translation; GO:0006418 tRNA aminoacylation for protein translation; GO:0006518 peptide metabolic process; GO:0006520 cellular amino acid metabolic process; GO:0006725 cellular aromatic compound metabolic process; GO:0006807 nitrogen compound metabo…	GO:0005622 intracellular; GO:0005623 cell; GO:0005737 cytoplasm; GO:0005829 cytosol; GO:0044424 intracellular part; GO:0044444 cytoplasmic part; GO:0044464 cell part;		K01874	MARS, metG; methionyl-tRNA synthetase [EC:6.1.1.10]	cann00450 Selenocompound metabolism; cann00970 Aminoacyl-tRNA biosynthesis; cann01100 Metabolic pathways	PF01588	Putative tRNA binding domain
Capana05g002292	164	0.51056	Down	1.60934e-05	K	PSMD1_CHICK 26S proteasome non-ATPase regulatory subunit 1 OS=Gallus gallus GN=PSMD1 PE=2 SV=1	PSMD1	1	4.02811e-06	103.69	RLDK(1)VAEAIVR	2	-7.8004	14	1.15569	1.16995	1.13879	1.40426	1.39055	1.34547		0.584604	0.594595	0.694495			1.19496		1.23514	0.663693	0.632933	0.656425							endoplasmic reticulum	GO:0006508 proteolysis; GO:0006511 ubiquitin-dependent protein catabolic process; GO:0006807 nitrogen compound metabolic process; GO:0008152 metabolic process; GO:0009056 catabolic process; GO:0009057 macromolecule catabolic process; GO:0009987 cellular process; GO:0010498 proteasomal protein catabolic process; GO:0019538 protein metabolic process; GO:0019941 modification-dependent protein catabo…	GO:0000502 proteasome complex; GO:0005622 intracellular; GO:0005623 cell; GO:0005634 nucleus; GO:0005737 cytoplasm; GO:0005829 cytosol; GO:0005838 proteasome regulatory particle; GO:0005886 plasma membrane; GO:0008540 proteasome regulatory particle, base subcomplex; GO:0016020 membrane; GO:0022624 proteasome accessory complex; GO:0031597 cytosolic proteasome complex; GO:0032991 macromolecular com…		K03032	PSMD1, RPN2; 26S proteasome regulatory subunit N2	cann03050 Proteasome
Capana05g002511	130	2.89032	Up	0.0126841	K	"RK2B_COFAR 50S ribosomal protein L2-B, chloroplastic OS=Coffea arabica GN=rpl2-B PE=3 SV=1"	rpl2-B	1	0.000455828	102.46	NK(1)YSDNLILR	2	-7.0431	27		0.386433	0.450326	0.60708	0.7924	0.778966		1.32157	1.09693	1.38677	0.940798	1.53571	1.34848	0.797772	0.879891	1.70436	1.47464	1.37753	1.49581	0.926066	0.897073	0.933333	0.818667	0.718499	cytoplasm	GO:0002181 cytoplasmic translation; GO:0006412 translation; GO:0006518 peptide metabolic process; GO:0006807 nitrogen compound metabolic process; GO:0008152 metabolic process; GO:0009058 biosynthetic process; GO:0009059 macromolecule biosynthetic process; GO:0009987 cellular process; GO:0010467 gene expression; GO:0019538 protein metabolic process; GO:0034641 cellular nitrogen compound metabolic …	GO:0005622 intracellular; GO:0005623 cell; GO:0005737 cytoplasm; GO:0005829 cytosol; GO:0005840 ribosome; GO:0009507 chloroplast; GO:0009526 plastid envelope; GO:0009532 plastid stroma; GO:0009536 plastid; GO:0009570 chloroplast stroma; GO:0009941 chloroplast envelope; GO:0015934 large ribosomal subunit; GO:0016020 membrane; GO:0022625 cytosolic large ribosomal subunit; GO:0022626 cytosolic ribos…	GO:0003676 nucleic acid binding; GO:0003723 RNA binding; GO:0003729 mRNA binding; GO:0003735 structural constituent of ribosome; GO:0005198 structural molecule activity; GO:0005488 binding; GO:0097159 organic cyclic compound binding; GO:1901363 heterocyclic compound binding;	K02886	RP-L2, MRPL2, rplB; large subunit ribosomal protein L2	cann03010 Ribosome	PF03947	Ribosomal Proteins L2, C-terminal domain
Capana06g000586	200	0.435258	Down	0.00034282	K	GPMB_ENT38 Probable phosphoglycerate mutase gpmB OS=Enterobacter sp. (strain 638) GN=gpmB PE=3 SV=1	gpmB	1	1.29056e-12	143.22	SCWDK(1)ILVHESK	2	-4.3021	23	1.47872	1.33058	1.4186	1.72836	1.84623	1.68332	0.630894	0.595925			0.567136	0.544933	1.02063	1.23568		0.743353	0.889503	0.798002	0.485	0.789737			0.561404	0.567433	chloroplast	GO:0006793 phosphorus metabolic process; GO:0006796 phosphate-containing compound metabolic process; GO:0008152 metabolic process; GO:0009987 cellular process; GO:0016311 dephosphorylation; GO:0044237 cellular metabolic process;	GO:0005622 intracellular; GO:0005623 cell; GO:0005737 cytoplasm; GO:0009507 chloroplast; GO:0009532 plastid stroma; GO:0009536 plastid; GO:0009570 chloroplast stroma; GO:0043226 organelle; GO:0043227 membrane-bounded organelle; GO:0043229 intracellular organelle; GO:0043231 intracellular membrane-bounded organelle; GO:0044422 organelle part; GO:0044424 intracellular part; GO:0044434 chloroplast p…	GO:0003824 catalytic activity; GO:0016787 hydrolase activity; GO:0016788 hydrolase activity, acting on ester bonds; GO:0016791 phosphatase activity; GO:0042578 phosphoric ester hydrolase activity; GO:0047538 2-carboxy-D-arabinitol-1-phosphatase activity;	K22200	E3.1.3.63; 2-carboxy-D-arabinitol-1-phosphatase [EC:3.1.3.63]		PF00300	Histidine phosphatase superfamily (branch 1)
Capana06g000596	417	0.542136	Down	0.0052038	K	VPS4_YEAST Vacuolar protein sorting-associated protein 4 OS=Saccharomyces cerevisiae (strain ATCC 204508 / S288c) GN=VPS4 PE=1 SV=1	VPS4	1	0.00215333	119.55	QRPTVSK(1)SDLDVHER	3	-0.68664	19	1.49725	1.55872	1.33434	1.18907	1.20813	1.17194	0.731941		0.854822	0.782313		0.847209	0.945274	0.894839	0.964431	1.13807	0.943645	0.948066	0.762743	0.798701	0.747756				nucleus	GO:0006629 lipid metabolic process; GO:0006810 transport; GO:0006900 membrane budding; GO:0006914 autophagy; GO:0006996 organelle organization; GO:0007032 endosome organization; GO:0007034 vacuolar transport; GO:0008104 protein localization; GO:0008152 metabolic process; GO:0008202 steroid metabolic process; GO:0009056 catabolic process; GO:0009987 cellular process; GO:0010256 endomembrane system…	GO:0005622 intracellular; GO:0005623 cell; GO:0005634 nucleus; GO:0005737 cytoplasm; GO:0005768 endosome; GO:0010008 endosome membrane; GO:0012505 endomembrane system; GO:0016020 membrane; GO:0031090 organelle membrane; GO:0031410 cytoplasmic vesicle; GO:0031982 vesicle; GO:0032991 macromolecular complex; GO:0036452 ESCRT complex; GO:0043226 organelle; GO:0043227 membrane-bounded organelle; GO:00…	GO:0000166 nucleotide binding; GO:0003824 catalytic activity; GO:0005488 binding; GO:0005515 protein binding; GO:0005524 ATP binding; GO:0008144 drug binding; GO:0016462 pyrophosphatase activity; GO:0016787 hydrolase activity; GO:0016817 hydrolase activity, acting on acid anhydrides; GO:0016818 hydrolase activity, acting on acid anhydrides, in phosphorus-containing anhydrides; GO:0016887 ATPase a…	K12196	VPS4; vacuolar protein-sorting-associated protein 4	cann04144 Endocytosis	PF04212; PF00004; PF09336	MIT (microtubule interacting and transport) domain; ATPase family associated with various cellular activities (AAA); Vps4 C terminal oligomerisation domain
Capana06g000675	256	0.536016	Down	0.000136415	K	GLUA_DICDI Lysosomal beta glucosidase OS=Dictyostelium discoideum GN=gluA PE=1 SV=2	gluA	1	3.6202e-53	173.26	SNVAACAK(1)HFVGDGGTVR	2	-2.2052	24	1.6087	1.55532	1.5149	1.67846	1.96568	1.86237	0.89359	0.835196	0.779188	0.792426	0.841398	0.79561	1.22928	1.41104	1.30952	0.651771	0.73327	0.738073	0.694215	0.714435	0.808383	0.418079	0.398243	0.39145	chloroplast,mitochondria				K05349	bglX; beta-glucosidase [EC:3.2.1.21]	cann00460 Cyanoamino acid metabolism; cann00500 Starch and sucrose metabolism; cann00940 Phenylpropanoid biosynthesis; cann01100 Metabolic pathways; cann01110 Biosynthesis of secondary metabolites	PF00933	Glycosyl hydrolase family 3 N terminal domain
Capana06g000728	305	1.99533	Up	0.046337	K	"Chloroplast stem-loop binding protein of 41 kDa b, chloroplastic"	---	1	5.16447e-08	164.22	AGGFPEPELVHYNPK(1)EFDFGK	3	-8.1567	24	1.10356	0.46394	0.764513	0.732558	0.718519	0.784091	1.75852	1.36312	1.53148	1.76862	0.937713	1.39194	1.37286	0.590426	0.711828	1.06412	0.813616	0.810044	0.705946	0.748634	0.659067	0.892502	0.940271	0.915315	chloroplast	GO:0001101 response to acid chemical; GO:0005975 carbohydrate metabolic process; GO:0005996 monosaccharide metabolic process; GO:0006139 nucleobase-containing compound metabolic process; GO:0006355 regulation of transcription, DNA-templated; GO:0006364 rRNA processing; GO:0006396 RNA processing; GO:0006412 translation; GO:0006417 regulation of translation; GO:0006518 peptide metabolic process; GO…	GO:0000427 plastid-encoded plastid RNA polymerase complex; GO:0000428 DNA-directed RNA polymerase complex; GO:0005576 extracellular region; GO:0005622 intracellular; GO:0005623 cell; GO:0005737 cytoplasm; GO:0005773 vacuole; GO:0005777 peroxisome; GO:0005840 ribosome; GO:0005911 cell-cell junction; GO:0009506 plasmodesma; GO:0009507 chloroplast; GO:0009526 plastid envelope; GO:0009532 plastid str…	GO:0001871 pattern binding; GO:0003676 nucleic acid binding; GO:0003677 DNA binding; GO:0003723 RNA binding; GO:0005488 binding; GO:0010297 heteropolysaccharide binding; GO:0030246 carbohydrate binding; GO:0030247 polysaccharide binding; GO:0097159 organic cyclic compound binding; GO:1901363 heterocyclic compound binding;
Capana06g000728	113	2.96333	Up	0.033958	K	"Chloroplast stem-loop binding protein of 41 kDa b, chloroplastic"	---	1	0.0034556	102.46	LLHLK(1)GDR	2	-3.7924	24	0.297071	0.485468	0.613363	0.393235	1.03386	1.19215	1.38249	1.37347	1.38056	0.692375	0.870307	1.01629	1.24573	1.08936	1.03226	0.996625	1.09487	1.1048	1.07459	0.671038	0.86114	1.18789	1.39095	1.29369	chloroplast	GO:0001101 response to acid chemical; GO:0005975 carbohydrate metabolic process; GO:0005996 monosaccharide metabolic process; GO:0006139 nucleobase-containing compound metabolic process; GO:0006355 regulation of transcription, DNA-templated; GO:0006364 rRNA processing; GO:0006396 RNA processing; GO:0006412 translation; GO:0006417 regulation of translation; GO:0006518 peptide metabolic process; GO…	GO:0000427 plastid-encoded plastid RNA polymerase complex; GO:0000428 DNA-directed RNA polymerase complex; GO:0005576 extracellular region; GO:0005622 intracellular; GO:0005623 cell; GO:0005737 cytoplasm; GO:0005773 vacuole; GO:0005777 peroxisome; GO:0005840 ribosome; GO:0005911 cell-cell junction; GO:0009506 plasmodesma; GO:0009507 chloroplast; GO:0009526 plastid envelope; GO:0009532 plastid str…	GO:0001871 pattern binding; GO:0003676 nucleic acid binding; GO:0003677 DNA binding; GO:0003723 RNA binding; GO:0005488 binding; GO:0010297 heteropolysaccharide binding; GO:0030246 carbohydrate binding; GO:0030247 polysaccharide binding; GO:0097159 organic cyclic compound binding; GO:1901363 heterocyclic compound binding;
Capana06g000748	113	0.527332	Down	0.031921	K	"RR30_SPIOL 30S ribosomal protein 1, chloroplastic OS=Spinacia oleracea GN=RPS30 PE=1 SV=2"	RPS30	1	1.18297e-08	170.85	AVQK(1)HSHLVR	2	2.1099	18	1.40018		1.50669	1.25677		0.663008	0.680688		0.852198	0.581435	0.85516	0.786432	0.542697	1.26605				0.616228				1.41268	1.48761	1.34988	chloroplast
Capana06g000900	3	0.604366	Down	0.0176172	K	RL171_ARATH 60S ribosomal protein L17-1 OS=Arabidopsis thaliana GN=RPL17A PE=1 SV=1	RPL17A	1	4.96642e-16	157.77	VK(1)YSNESANPTK(1)SCK	2	7.6964	29	1.11626		1.35377	1.11415	1.23763	1.23399	0.752178	0.666982	0.820039	0.775842	0.704116		1.23657	1.29745	1.31659	0.867495	0.831622	0.735795	0.794788	0.670319	0.771662	0.556465			chloroplast	GO:0042592 homeostatic process; GO:0048872 homeostasis of number of cells; GO:0061484 hematopoietic stem cell homeostasis; GO:0065007 biological regulation; GO:0065008 regulation of biological quality;			K02880	RP-L17e, RPL17; large subunit ribosomal protein L17e	cann03010 Ribosome	PF00237	Ribosomal protein L22p/L17e
Capana06g000900	13	0.572729	Down	0.00073532	K	RL171_ARATH 60S ribosomal protein L17-1 OS=Arabidopsis thaliana GN=RPL17A PE=1 SV=1	RPL17A	1	6.70903e-78	224.49	YSNESANPTK(1)SCK	2	-6.391	34	1.30407	1.36794	1.55341	1.29711	1.34307	1.43103	0.81607	0.763482	0.840467	0.658537	0.611791	0.690078	1.25071	1.322	1.38199	0.759834	0.854209	0.776515	0.843648	0.683267	0.828746	0.420622	0.505102	0.409938	chloroplast	GO:0042592 homeostatic process; GO:0048872 homeostasis of number of cells; GO:0061484 hematopoietic stem cell homeostasis; GO:0065007 biological regulation; GO:0065008 regulation of biological quality;			K02880	RP-L17e, RPL17; large subunit ribosomal protein L17e	cann03010 Ribosome	PF00237	Ribosomal protein L22p/L17e
Capana06g001195	488	0.48534	Down	2.2376e-05	K	"THRC_SOLTU Threonine synthase, chloroplastic OS=Solanum tuberosum PE=2 SV=1"	---	1	6.98345e-07	121.8	FTQSK(1)VDYHSK	2	-1.1105	25	1.30182	1.32509	1.32197	1.51737	1.53568	1.40126	0.658514	0.598322	0.659716	0.890834	0.872385	0.761099	1.40179	1.35827	1.24184	0.684543	0.766416	0.812698		0.837185	0.612371	0.694475	0.660138	0.721839	chloroplast		GO:0005622 intracellular; GO:0005623 cell; GO:0005737 cytoplasm; GO:0044424 intracellular part; GO:0044464 cell part;	GO:0003824 catalytic activity; GO:0004795 threonine synthase activity; GO:0005488 binding; GO:0008144 drug binding; GO:0016829 lyase activity; GO:0016835 carbon-oxygen lyase activity; GO:0016838 carbon-oxygen lyase activity, acting on phosphates; GO:0019842 vitamin binding; GO:0030170 pyridoxal phosphate binding; GO:0036094 small molecule binding; GO:0043167 ion binding; GO:0043168 anion binding;…	K01733	thrC; threonine synthase [EC:4.2.3.1]	cann00260 Glycine, serine and threonine metabolism; cann00750 Vitamin B6 metabolism; cann01100 Metabolic pathways; cann01110 Biosynthesis of secondary metabolites; cann01230 Biosynthesis of amino acids
Capana06g001411	25	0.601406	Down	0.0021351	K	RL18A_CASSA 60S ribosomal protein L18a OS=Castanea sativa GN=RPL18A PE=2 SV=1	RPL18A	1	2.72316e-12	138.71	ALPSETDEHPK(1)IYR	2	-1.045	22	1.42647	1.19238	1.19503	1.24327	1.15996	1.13211	0.815761	0.709613	0.768317	0.902463	0.840909	0.92803	0.933391	1.1744	1.06973	0.774312	0.745325	0.817544	0.863289	0.671258	0.851884		0.980583		cytoplasm				K02882	RP-L18Ae, RPL18A; large subunit ribosomal protein L18Ae	cann03010 Ribosome	PF01775	Ribosomal L18ae/LX protein domain
Capana06g001411	127	0.395648	Down	0.0070641	K	RL18A_CASSA 60S ribosomal protein L18a OS=Castanea sativa GN=RPL18A PE=2 SV=1	RPL18A	1	2.69876e-16	119.52	HHCIQIIK(1)TATIPAK	2	-0.079256	18	1.61642	1.31506	1.26955	1.20984		1.20035	0.629393	0.478692			0.553977	0.524621	0.788927	1.06586	1.0406	0.788073	0.90472	0.891228	0.735182	0.957759	0.924628				cytoplasm				K02882	RP-L18Ae, RPL18A; large subunit ribosomal protein L18Ae	cann03010 Ribosome	PF01775	Ribosomal L18ae/LX protein domain
Capana06g001411	94	0.593712	Down	0.027197	K	RL18A_CASSA 60S ribosomal protein L18a OS=Castanea sativa GN=RPL18A PE=2 SV=1	RPL18A	1	2.96004e-06	99.276	TGYHNMYK(1)EYR	2	-8.1565	23	1.18627		1.02116	1.15135	1.13762	1.05337		0.684836	0.625743	0.876847	0.881629	1.10417	1.12111	1.20408	1.15799	0.837615	0.911843	0.589474			0.907975		1.36311	1.17798	cytoplasm				K02882	RP-L18Ae, RPL18A; large subunit ribosomal protein L18Ae	cann03010 Ribosome	PF01775	Ribosomal L18ae/LX protein domain
Capana06g001736	273	1.64118	Up	0.0059815	K	ALDH_CRAPL Aldehyde dehydrogenase OS=Craterostigma plantagineum GN=ALDH PE=1 SV=1	ALDH	1	0.0032108	102.55	HELEK(1)FYGK	2	-10.526	19	0.630897		0.753321	0.777465		1.12373	1.17488	1.13871	1.09403	0.81338			1.01494	0.980681	0.991469	0.761111	0.897046		1.05307	0.831074	1.05825	1.08476	1.40089	1.36782	cytoskeleton	GO:0001101 response to acid chemical; GO:0006950 response to stress; GO:0006970 response to osmotic stress; GO:0008152 metabolic process; GO:0009269 response to desiccation; GO:0009414 response to water deprivation; GO:0009415 response to water; GO:0009628 response to abiotic stimulus; GO:0009651 response to salt stress; GO:0009719 response to endogenous stimulus; GO:0009725 response to hormone; …	GO:0005622 intracellular; GO:0005623 cell; GO:0005737 cytoplasm; GO:0005773 vacuole; GO:0005783 endoplasmic reticulum; GO:0005794 Golgi apparatus; GO:0005911 cell-cell junction; GO:0009506 plasmodesma; GO:0009536 plastid; GO:0012505 endomembrane system; GO:0016020 membrane; GO:0030054 cell junction; GO:0043226 organelle; GO:0043227 membrane-bounded organelle; GO:0043229 intracellular organelle; G…	GO:0003824 catalytic activity; GO:0004028 3-chloroallyl aldehyde dehydrogenase activity; GO:0004029 aldehyde dehydrogenase (NAD) activity; GO:0016491 oxidoreductase activity; GO:0016620 oxidoreductase activity, acting on the aldehyde or oxo group of donors, NAD or NADP as acceptor; GO:0016903 oxidoreductase activity, acting on the aldehyde or oxo group of donors;	K00128	ALDH; aldehyde dehydrogenase (NAD+) [EC:1.2.1.3]	cann00010 Glycolysis / Gluconeogenesis; cann00053 Ascorbate and aldarate metabolism; cann00071 Fatty acid degradation; cann00280 Valine, leucine and isoleucine degradation; cann00310 Lysine degradation; cann00330 Arginine and proline metabolism; cann00340 Histidine metabolism; cann00380 Tryptophan metabolism; cann00410 beta-Alanine metabolism; cann00561 Glycerolipid metabolism; cann00620 Pyruvate…
Capana06g002224	172	2.23872	Up	0.048865	K	GATA-N domain-containing protein	---	1	9.94944e-08	110.14	YAHVACLEK(1)SNSGNFFAK	2	-4.1843	34	0.810433		0.565934	0.984831	1.21598	1.40972	1.45323		1.62808	0.785235	0.441009		2.49268	0.958042	1.01531	1.15421	1.03328	1.12706	1.13905	0.880884	0.748815	0.488809	0.469531		nucleus
Capana07g000048	320	0.549244	Down	0.003939	K	PSAA_TOBAC Photosystem I P700 chlorophyll a apoprotein A1 OS=Nicotiana tabacum GN=psaA PE=3 SV=2	psaA	1	5.6327e-217	281.56	TNWGIGHGLK(1)DILEAHK	3	-6.2607	49	0.67207	0.637097	0.690614	1.02668	0.813977	0.765408	0.32526	0.331382	0.441725	0.45676	0.736145	0.89801	0.701479	1.63562	1.21763	1.23991	1.31823	1.22434	1.18078	1.23241	1.07532	1.32475	1.2048	1.54062	plasma membrane	GO:0008152 metabolic process; GO:0009987 cellular process; GO:0015979 photosynthesis; GO:0044237 cellular metabolic process;	GO:0005622 intracellular; GO:0005623 cell; GO:0005737 cytoplasm; GO:0009507 chloroplast; GO:0009526 plastid envelope; GO:0009532 plastid stroma; GO:0009534 chloroplast thylakoid; GO:0009535 chloroplast thylakoid membrane; GO:0009536 plastid; GO:0009570 chloroplast stroma; GO:0009579 thylakoid; GO:0009941 chloroplast envelope; GO:0010287 plastoglobule; GO:0016020 membrane; GO:0031967 organelle env…		K02689	psaA; photosystem I P700 chlorophyll a apoprotein A1	cann00195 Photosynthesis; cann01100 Metabolic pathways
Capana07g000069	122	0.306241	Down	0.00044316	K	RNS7_NICAL Ribonuclease S-7 OS=Nicotiana alata PE=1 SV=1	---	1	8.47108e-43	158.59	NEYNK(1)HGVCGGLAAK	2	-4.6071	22	1.54151	1.79107	1.60272	1.83108	1.57998	1.66404	0.61186	0.443312	0.456215	0.750831	0.92381	0.663512	1.32624	1.43857	1.60699	0.760606	1.14059	1.15448	1.12439			0.618782	0.475108	0.499378	vacuolar membrane		GO:0005622 intracellular; GO:0005623 cell; GO:0005737 cytoplasm; GO:0044424 intracellular part; GO:0044464 cell part;		K01166	E3.1.27.1; ribonuclease T2 [EC:3.1.27.1]		PF00445	Ribonuclease T2 family
Capana07g000146	239	2.0672	Up	0.0014779	K	IF3_NOSS1 Translation initiation factor IF-3 OS=Nostoc sp. (strain PCC 7120 / UTEX 2576) GN=infC PE=3 SV=1	infC	1	0.0111095	56.014	IMDYNK(1)YK	2	5.0847	14		0.677346	0.642857	0.888143			1.37806	1.35106		0.982759	0.705288		1.1015	0.905952		1.09766			1.03516			1.03996	1.05482	1.01163	chloroplast	GO:0006412 translation; GO:0006413 translational initiation; GO:0006518 peptide metabolic process; GO:0006807 nitrogen compound metabolic process; GO:0006996 organelle organization; GO:0007275 multicellular organism development; GO:0008152 metabolic process; GO:0009058 biosynthetic process; GO:0009059 macromolecule biosynthetic process; GO:0009657 plastid organization; GO:0009658 chloroplast orga…	GO:0005618 cell wall; GO:0005622 intracellular; GO:0005623 cell; GO:0005737 cytoplasm; GO:0009507 chloroplast; GO:0009536 plastid; GO:0030312 external encapsulating structure; GO:0043226 organelle; GO:0043227 membrane-bounded organelle; GO:0043229 intracellular organelle; GO:0043231 intracellular membrane-bounded organelle; GO:0044424 intracellular part; GO:0044444 cytoplasmic part; GO:0044464 ce…	GO:0003676 nucleic acid binding; GO:0003723 RNA binding; GO:0003743 translation initiation factor activity; GO:0005488 binding; GO:0008135 translation factor activity, RNA binding; GO:0043021 ribonucleoprotein complex binding; GO:0043022 ribosome binding; GO:0044877 macromolecular complex binding; GO:0097159 organic cyclic compound binding; GO:1901363 heterocyclic compound binding;	K02520	infC, MTIF3; translation initiation factor IF-3		PF05198; PF00707	Translation initiation factor IF-3, N-terminal domain; Translation initiation factor IF-3, C-terminal domain
Capana07g000214	72	0.584507	Down	0.0021813	K	PGIP_PYRCO Polygalacturonase inhibitor OS=Pyrus communis GN=PGIP PE=1 SV=1	PGIP	1	1.36239e-07	134.66	VTLSCDDK(1)TNR	2	-7.0498	21	1.4642	1.21067	1.1527	1.4603	1.30759	1.27046	0.743961	0.71949	0.773788	0.689288	0.634091	0.707426	0.83908	0.827922	0.985915		0.564202	0.594378			0.545455	0.386216	0.395181	0.366337	extracellular	GO:0043086 negative regulation of catalytic activity; GO:0044092 negative regulation of molecular function; GO:0050790 regulation of catalytic activity; GO:0065007 biological regulation; GO:0065009 regulation of molecular function;	GO:0005618 cell wall; GO:0005622 intracellular; GO:0005623 cell; GO:0005737 cytoplasm; GO:0005794 Golgi apparatus; GO:0005911 cell-cell junction; GO:0009505 plant-type cell wall; GO:0009506 plasmodesma; GO:0012505 endomembrane system; GO:0016020 membrane; GO:0030054 cell junction; GO:0030312 external encapsulating structure; GO:0043226 organelle; GO:0043227 membrane-bounded organelle; GO:0043229 …	GO:0004857 enzyme inhibitor activity; GO:0030234 enzyme regulator activity; GO:0090353 polygalacturonase inhibitor activity; GO:0098772 molecular function regulator;
Capana07g000220	367	0.628045	Down	0.0063559	K	GAPN_NICPL NADP-dependent glyceraldehyde-3-phosphate dehydrogenase OS=Nicotiana plumbaginifolia GN=GAPN PE=2 SV=1	GAPN	1	7.44587e-25	173.07	EKDATFCQPYK(1)R	2	-6.1901	46	1.319	1.42412		1.38664	1.47047	1.44529	0.936673	0.853612	0.793916	0.754497	0.933624	1.18387	1.25229	1.07817		0.705114		0.732856	1.02822	0.814983	0.738149	0.831234	0.826599	0.552718	cytoplasm		GO:0005622 intracellular; GO:0005623 cell; GO:0005737 cytoplasm; GO:0044424 intracellular part; GO:0044464 cell part;		K00131	gapN; glyceraldehyde-3-phosphate dehydrogenase (NADP+) [EC:1.2.1.9]	cann00010 Glycolysis / Gluconeogenesis; cann00030 Pentose phosphate pathway; cann01100 Metabolic pathways; cann01200 Carbon metabolism
Capana07g000220	46	0.592432	Down	2.4316e-05	K	GAPN_NICPL NADP-dependent glyceraldehyde-3-phosphate dehydrogenase OS=Nicotiana plumbaginifolia GN=GAPN PE=2 SV=1	GAPN	1	8.3024e-143	261.63	TQYK(1)VQACTQEEVNK	2	1.6883	60	1.451	1.50208	1.46897	1.56984	1.61862	1.47954	0.844045	0.865019	0.910697	0.730159	0.717084	0.766667	1.22177	1.21827	1.31968	0.948857	0.929474	0.881269	0.697517	0.683314	0.687359	0.498741	0.55303	0.558484	cytoplasm		GO:0005622 intracellular; GO:0005623 cell; GO:0005737 cytoplasm; GO:0044424 intracellular part; GO:0044464 cell part;		K00131	gapN; glyceraldehyde-3-phosphate dehydrogenase (NADP+) [EC:1.2.1.9]	cann00010 Glycolysis / Gluconeogenesis; cann00030 Pentose phosphate pathway; cann01100 Metabolic pathways; cann01200 Carbon metabolism
Capana07g000220	101	0.601066	Down	0.0120028	K	GAPN_NICPL NADP-dependent glyceraldehyde-3-phosphate dehydrogenase OS=Nicotiana plumbaginifolia GN=GAPN PE=2 SV=1	GAPN	0.998242	0.00793771	58.313	APIAECLIK(0.998)EIAK(0.002)PAK	3	-8.3901	5	1.247	1.35551					0.765595	0.88308	0.697743																cytoplasm		GO:0005622 intracellular; GO:0005623 cell; GO:0005737 cytoplasm; GO:0044424 intracellular part; GO:0044464 cell part;		K00131	gapN; glyceraldehyde-3-phosphate dehydrogenase (NADP+) [EC:1.2.1.9]	cann00010 Glycolysis / Gluconeogenesis; cann00030 Pentose phosphate pathway; cann01100 Metabolic pathways; cann01200 Carbon metabolism
Capana07g000235	57	1.97106	Up	0.00562	K	BLC_CITFR Outer membrane lipoprotein blc OS=Citrobacter freundii PE=3 SV=1	---	1	8.37253e-14	123.92	ATYSLNPDGTIHVLNETWSGGK(1)R	3	-7.3663	26	0.821192	0.926471	0.904506	0.874	1.04942	1.02109	1.39939	2.10059	1.7276	1.60808	1.11898	1.0954	0.468905		0.389527			0.342368	0.365079	0.525405	0.600279	0.531029			peroxisome	GO:0000003 reproduction; GO:0001101 response to acid chemical; GO:0003006 developmental process involved in reproduction; GO:0006873 cellular ion homeostasis; GO:0006875 cellular metal ion homeostasis; GO:0006883 cellular sodium ion homeostasis; GO:0006950 response to stress; GO:0006970 response to osmotic stress; GO:0006972 hyperosmotic response; GO:0007275 multicellular organism development; GO…	GO:0005622 intracellular; GO:0005623 cell; GO:0005737 cytoplasm; GO:0005739 mitochondrion; GO:0005773 vacuole; GO:0005774 vacuolar membrane; GO:0005783 endoplasmic reticulum; GO:0005794 Golgi apparatus; GO:0005886 plasma membrane; GO:0005911 cell-cell junction; GO:0009506 plasmodesma; GO:0009507 chloroplast; GO:0009526 plastid envelope; GO:0009536 plastid; GO:0009898 cytoplasmic side of plasma me…		K03098	APOD; apolipoprotein D and lipocalin family protein		PF08212	Lipocalin-like domain
Capana07g000351	42	0.524455	Down	0.034384	K	AVP_VIGRR Pyrophosphate-energized vacuolar membrane proton pump OS=Vigna radiata var. radiata PE=1 SV=3	---	1	7.19191e-85	216.38	VHVSADK(1)THHHSSVGGGDDK	3	-6.7564	21	1.82734	1.51319	1.37794	1.02183	1.28656	1.24261		0.669978	0.979775			0.853659	1.11774	1.06739	1.18159	1.11529	1.37093	0.889693	0.858503	1.01579	0.914839	0.385228	0.551119	0.585834	plasma membrane				K23025
Capana07g000351	699	0.605477	Down	0.0067434	K	AVP_VIGRR Pyrophosphate-energized vacuolar membrane proton pump OS=Vigna radiata var. radiata PE=1 SV=3	---	1	1.69157e-26	187.33	K(1)YIEAGASEHAR	2	-6.2313	25	1.48345	1.36807	1.10492	1.14956	1.11067	1.12232	0.847059	0.740618	0.807865	0.865806	1.02276	1.0393	1.04742	1.05211	1.04983	1.11654	1.02442	0.844485	0.967347	0.984211	0.994839	0.849097	0.935269	0.905162	plasma membrane				K23025
Capana07g000907	116	1.64498	Up	0.026902	K	"TRL2_ORYSJ Thioredoxin-like 2, chloroplastic OS=Oryza sativa subsp. japonica GN=Os05g0200100 PE=2 SV=1"	Os05g0200100	1	8.2183e-67	189.13	GADGQLESFSCSLAK(1)FQK	2	-1.984	24	0.919153	1.07255		1.22837	1.22016	1.17608		1.58491	1.6914	1.04202	0.922236			0.965898	0.968655	0.887166	0.980018	0.885797		1.18947	0.726228	0.444005	0.308247	0.214437	nucleus	GO:0008152 metabolic process; GO:0009593 detection of chemical stimulus; GO:0010109 regulation of photosynthesis; GO:0019222 regulation of metabolic process; GO:0031323 regulation of cellular metabolic process; GO:0042221 response to chemical; GO:0050789 regulation of biological process; GO:0050794 regulation of cellular process; GO:0050896 response to stimulus; GO:0051606 detection of stimulus; …	GO:0005622 intracellular; GO:0005623 cell; GO:0005737 cytoplasm; GO:0009507 chloroplast; GO:0009532 plastid stroma; GO:0009536 plastid; GO:0009570 chloroplast stroma; GO:0043226 organelle; GO:0043227 membrane-bounded organelle; GO:0043229 intracellular organelle; GO:0043231 intracellular membrane-bounded organelle; GO:0044422 organelle part; GO:0044424 intracellular part; GO:0044434 chloroplast p…	GO:0003824 catalytic activity; GO:0016491 oxidoreductase activity; GO:0016667 oxidoreductase activity, acting on a sulfur group of donors; GO:0016671 oxidoreductase activity, acting on a sulfur group of donors, disulfide as acceptor;				PF00085	Thioredoxin
Capana07g000909	344	0.665425	Down	0.030076	K	PMA4_NICPL Plasma membrane ATPase 4 OS=Nicotiana plumbaginifolia GN=PMA4 PE=2 SV=1	PMA4	1	1.34118e-07	111.61	VHAIIDK(1)YAER	2	-2.9696	22		1.29778	1.15057		1.68146	1.55847	0.782301	0.846894		0.757941		0.512987	1.38087	1.20197	1.2574	0.898999	1.01758	0.811249		0.752066	0.837325	0.577065	0.692491	0.724138	plasma membrane	GO:0001101 response to acid chemical; GO:0006810 transport; GO:0006811 ion transport; GO:0006812 cation transport; GO:0006950 response to stress; GO:0009414 response to water deprivation; GO:0009415 response to water; GO:0009628 response to abiotic stimulus; GO:0009719 response to endogenous stimulus; GO:0009725 response to hormone; GO:0009737 response to abscisic acid; GO:0009987 cellular proces…	GO:0005622 intracellular; GO:0005623 cell; GO:0005634 nucleus; GO:0005737 cytoplasm; GO:0005773 vacuole; GO:0005794 Golgi apparatus; GO:0005886 plasma membrane; GO:0005911 cell-cell junction; GO:0009506 plasmodesma; GO:0012505 endomembrane system; GO:0016020 membrane; GO:0016021 integral component of membrane; GO:0030054 cell junction; GO:0031224 intrinsic component of membrane; GO:0043226 organe…	GO:0000287 magnesium ion binding; GO:0003824 catalytic activity; GO:0005215 transporter activity; GO:0005488 binding; GO:0008324 cation transmembrane transporter activity; GO:0008553 hydrogen-exporting ATPase activity, phosphorylative mechanism; GO:0015075 ion transmembrane transporter activity; GO:0015077 monovalent inorganic cation transmembrane transporter activity; GO:0015078 hydrogen ion tra…	K01535	PMA1, PMA2; H+-transporting ATPase [EC:3.6.3.6]	cann00190 Oxidative phosphorylation; cann01100 Metabolic pathways	PF00702	haloacid dehalogenase-like hydrolase
Capana07g000991	276	1.69765	Up	0.025538	K	"CH10C_ARATH 20 kDa chaperonin, chloroplastic OS=Arabidopsis thaliana GN=CPN21 PE=1 SV=2"	CPN21	1	4.6823e-23	186.56	KPLSVSPGNTVLYSK(1)YAGNEFK	3	-3.4148	81	0.802585	0.693128	0.795314	0.882883	0.906323	1.04711	0.963183	1.49641	1.42976	1.03807	0.675879	1.04149	1.41244	0.822581	0.832363	1.24623	1.07515	1.03537	1.18036	0.827425	0.952195	1.07789	0.918642	0.993069	chloroplast	GO:0006457 protein folding; GO:0006458 'de novo' protein folding; GO:0006950 response to stress; GO:0006986 response to unfolded protein; GO:0009266 response to temperature stimulus; GO:0009409 response to cold; GO:0009628 response to abiotic stimulus; GO:0009787 regulation of abscisic acid-activated signaling pathway; GO:0009788 negative regulation of abscisic acid-activated signaling pathway; G…	GO:0005576 extracellular region; GO:0005622 intracellular; GO:0005623 cell; GO:0005737 cytoplasm; GO:0005739 mitochondrion; GO:0005759 mitochondrial matrix; GO:0009507 chloroplast; GO:0009526 plastid envelope; GO:0009532 plastid stroma; GO:0009534 chloroplast thylakoid; GO:0009535 chloroplast thylakoid membrane; GO:0009536 plastid; GO:0009570 chloroplast stroma; GO:0009579 thylakoid; GO:0009941 c…	GO:0005488 binding; GO:0005507 copper ion binding; GO:0005515 protein binding; GO:0043167 ion binding; GO:0043169 cation binding; GO:0046872 metal ion binding; GO:0046914 transition metal ion binding; GO:0051082 unfolded protein binding; GO:0051087 chaperone binding;	K04078	groES, HSPE1; chaperonin GroES		PF00166	Chaperonin 10 Kd subunit
Capana07g000991	126	1.77463	Up	0.00146163	K	"CH10C_ARATH 20 kDa chaperonin, chloroplastic OS=Arabidopsis thaliana GN=CPN21 PE=1 SV=2"	CPN21	1	1.10014e-30	153.18	VIYSK(1)YAGTEVEFDGSK	2	-2.6734	23	1.17979	1.07938		0.884009	1.06792	0.845701	1.89549	2.09689	2.02143	0.866328	0.819933	0.917027	0.922811	1.12212	1.02677	0.752513	0.732121	0.503659	0.870633	0.876866	0.873171	0.774917	0.754004	0.742911	chloroplast	GO:0006457 protein folding; GO:0006458 'de novo' protein folding; GO:0006950 response to stress; GO:0006986 response to unfolded protein; GO:0009266 response to temperature stimulus; GO:0009409 response to cold; GO:0009628 response to abiotic stimulus; GO:0009787 regulation of abscisic acid-activated signaling pathway; GO:0009788 negative regulation of abscisic acid-activated signaling pathway; G…	GO:0005576 extracellular region; GO:0005622 intracellular; GO:0005623 cell; GO:0005737 cytoplasm; GO:0005739 mitochondrion; GO:0005759 mitochondrial matrix; GO:0009507 chloroplast; GO:0009526 plastid envelope; GO:0009532 plastid stroma; GO:0009534 chloroplast thylakoid; GO:0009535 chloroplast thylakoid membrane; GO:0009536 plastid; GO:0009570 chloroplast stroma; GO:0009579 thylakoid; GO:0009941 c…	GO:0005488 binding; GO:0005507 copper ion binding; GO:0005515 protein binding; GO:0043167 ion binding; GO:0043169 cation binding; GO:0046872 metal ion binding; GO:0046914 transition metal ion binding; GO:0051082 unfolded protein binding; GO:0051087 chaperone binding;	K04078	groES, HSPE1; chaperonin GroES		PF00166	Chaperonin 10 Kd subunit
Capana07g001189	374	0.562615	Down	0.0042786	K	"G6PDC_SOLTU Glucose-6-phosphate 1-dehydrogenase, chloroplastic OS=Solanum tuberosum PE=1 SV=1"	---	1	3.28056e-55	195.58	GPVGAHYLAAK(1)HNVR	3	1.5442	70	1.11849	1.35238	1.46654	1.02095	1.20713	1.07191	0.747573	0.663567	0.804104	0.651718	1.20588	0.899371	0.846154	1.21808	1.17514	0.669584	0.823164	0.978166		1.12896	0.730811	1.14248	0.890306		chloroplast	GO:0005975 carbohydrate metabolic process; GO:0005996 monosaccharide metabolic process; GO:0006006 glucose metabolic process; GO:0006081 cellular aldehyde metabolic process; GO:0006098 pentose-phosphate shunt; GO:0006139 nucleobase-containing compound metabolic process; GO:0006725 cellular aromatic compound metabolic process; GO:0006732 coenzyme metabolic process; GO:0006733 oxidoreduction coenzy…	GO:0005622 intracellular; GO:0005623 cell; GO:0005737 cytoplasm; GO:0009507 chloroplast; GO:0009532 plastid stroma; GO:0009536 plastid; GO:0009570 chloroplast stroma; GO:0043226 organelle; GO:0043227 membrane-bounded organelle; GO:0043229 intracellular organelle; GO:0043231 intracellular membrane-bounded organelle; GO:0044422 organelle part; GO:0044424 intracellular part; GO:0044434 chloroplast p…	GO:0003824 catalytic activity; GO:0004345 glucose-6-phosphate dehydrogenase activity; GO:0016491 oxidoreductase activity; GO:0016614 oxidoreductase activity, acting on CH-OH group of donors; GO:0016616 oxidoreductase activity, acting on the CH-OH group of donors, NAD or NADP as acceptor;	K00036	G6PD, zwf; glucose-6-phosphate 1-dehydrogenase [EC:1.1.1.49 1.1.1.363]	cann00030 Pentose phosphate pathway; cann00480 Glutathione metabolism; cann01100 Metabolic pathways; cann01110 Biosynthesis of secondary metabolites; cann01200 Carbon metabolism	PF00479; PF02781	Glucose-6-phosphate dehydrogenase, NAD binding domain; Glucose-6-phosphate dehydrogenase, C-terminal domain
Capana07g001192	156	0.594225	Down	0.0027774	K	"G6PDC_SOLTU Glucose-6-phosphate 1-dehydrogenase, chloroplastic OS=Solanum tuberosum PE=1 SV=1"	---	1	6.4073e-108	207.12	ENCDAK(1)MEHFLER	2	3.5784	20	1.43388	1.1744	1.19115	1.59105	1.34835	1.24213	0.696062	0.746544	0.815109	0.740365		0.711974	0.934911	1.01522	0.984245	0.918919	0.773029		0.57963	0.688287		1.46125			chloroplast	GO:0005975 carbohydrate metabolic process; GO:0005996 monosaccharide metabolic process; GO:0006006 glucose metabolic process; GO:0006081 cellular aldehyde metabolic process; GO:0006098 pentose-phosphate shunt; GO:0006139 nucleobase-containing compound metabolic process; GO:0006725 cellular aromatic compound metabolic process; GO:0006732 coenzyme metabolic process; GO:0006733 oxidoreduction coenzy…	GO:0005622 intracellular; GO:0005623 cell; GO:0005737 cytoplasm; GO:0009507 chloroplast; GO:0009532 plastid stroma; GO:0009536 plastid; GO:0009570 chloroplast stroma; GO:0043226 organelle; GO:0043227 membrane-bounded organelle; GO:0043229 intracellular organelle; GO:0043231 intracellular membrane-bounded organelle; GO:0044422 organelle part; GO:0044424 intracellular part; GO:0044434 chloroplast p…	GO:0003824 catalytic activity; GO:0004345 glucose-6-phosphate dehydrogenase activity; GO:0016491 oxidoreductase activity; GO:0016614 oxidoreductase activity, acting on CH-OH group of donors; GO:0016616 oxidoreductase activity, acting on the CH-OH group of donors, NAD or NADP as acceptor;	K00036	G6PD, zwf; glucose-6-phosphate 1-dehydrogenase [EC:1.1.1.49 1.1.1.363]	cann00030 Pentose phosphate pathway; cann00480 Glutathione metabolism; cann01100 Metabolic pathways; cann01110 Biosynthesis of secondary metabolites; cann01200 Carbon metabolism	PF00479	Glucose-6-phosphate dehydrogenase, NAD binding domain
Capana07g001429	569	0.660928	Down	0.0096775	K	"ACOC_CUCMA Aconitate hydratase, cytoplasmic OS=Cucurbita maxima PE=2 SV=1"	---	1	2.65429e-33	132.08	PWVK(1)TSLAPGSGVVTK	2	-4.0338	32	1.19274	1.23095	1.15359	1.21748	1.34685	1.29145	0.848731	0.860489	0.655104	0.762215		0.938394	1.36973	1.30009	1.38707	0.886899	0.922581		0.811417	0.773973	0.858283	0.623561	0.737557		chloroplast	GO:0001101 response to acid chemical; GO:0006082 organic acid metabolic process; GO:0006101 citrate metabolic process; GO:0006102 isocitrate metabolic process; GO:0006950 response to stress; GO:0006970 response to osmotic stress; GO:0006979 response to oxidative stress; GO:0007275 multicellular organism development; GO:0008152 metabolic process; GO:0009605 response to external stimulus; GO:000962…	GO:0005618 cell wall; GO:0005622 intracellular; GO:0005623 cell; GO:0005737 cytoplasm; GO:0005739 mitochondrion; GO:0005773 vacuole; GO:0005774 vacuolar membrane; GO:0005829 cytosol; GO:0009507 chloroplast; GO:0009532 plastid stroma; GO:0009536 plastid; GO:0009570 chloroplast stroma; GO:0016020 membrane; GO:0030312 external encapsulating structure; GO:0031090 organelle membrane; GO:0043226 organe…	GO:0000166 nucleotide binding; GO:0003824 catalytic activity; GO:0003994 aconitate hydratase activity; GO:0005488 binding; GO:0005507 copper ion binding; GO:0005524 ATP binding; GO:0008144 drug binding; GO:0016829 lyase activity; GO:0016835 carbon-oxygen lyase activity; GO:0016836 hydro-lyase activity; GO:0017076 purine nucleotide binding; GO:0030554 adenyl nucleotide binding; GO:0032553 ribonucl…	K01681	ACO, acnA; aconitate hydratase [EC:4.2.1.3]	cann00020 Citrate cycle (TCA cycle); cann00630 Glyoxylate and dicarboxylate metabolism; cann01100 Metabolic pathways; cann01110 Biosynthesis of secondary metabolites; cann01200 Carbon metabolism; cann01210 2-Oxocarboxylic acid metabolism; cann01230 Biosynthesis of amino acids	PF00694	Aconitase C-terminal domain
Capana07g001429	487	0.58543	Down	0.00039503	K	"ACOC_CUCMA Aconitate hydratase, cytoplasmic OS=Cucurbita maxima PE=2 SV=1"	---	1	7.85906e-29	161.23	EMK(1)SDWHACLDNK	2	-3.6984	23	1.5839	1.6061		1.54478	1.54642	1.52165	0.970558	0.89613	0.934589	0.625407	0.700226	0.620462	1.31651	1.26898	1.2459	1.02733	1.03318	1.06377	0.924567	0.843444	0.820359	0.396811	0.311312	0.37702	chloroplast	GO:0001101 response to acid chemical; GO:0006082 organic acid metabolic process; GO:0006101 citrate metabolic process; GO:0006102 isocitrate metabolic process; GO:0006950 response to stress; GO:0006970 response to osmotic stress; GO:0006979 response to oxidative stress; GO:0007275 multicellular organism development; GO:0008152 metabolic process; GO:0009605 response to external stimulus; GO:000962…	GO:0005618 cell wall; GO:0005622 intracellular; GO:0005623 cell; GO:0005737 cytoplasm; GO:0005739 mitochondrion; GO:0005773 vacuole; GO:0005774 vacuolar membrane; GO:0005829 cytosol; GO:0009507 chloroplast; GO:0009532 plastid stroma; GO:0009536 plastid; GO:0009570 chloroplast stroma; GO:0016020 membrane; GO:0030312 external encapsulating structure; GO:0031090 organelle membrane; GO:0043226 organe…	GO:0000166 nucleotide binding; GO:0003824 catalytic activity; GO:0003994 aconitate hydratase activity; GO:0005488 binding; GO:0005507 copper ion binding; GO:0005524 ATP binding; GO:0008144 drug binding; GO:0016829 lyase activity; GO:0016835 carbon-oxygen lyase activity; GO:0016836 hydro-lyase activity; GO:0017076 purine nucleotide binding; GO:0030554 adenyl nucleotide binding; GO:0032553 ribonucl…	K01681	ACO, acnA; aconitate hydratase [EC:4.2.1.3]	cann00020 Citrate cycle (TCA cycle); cann00630 Glyoxylate and dicarboxylate metabolism; cann01100 Metabolic pathways; cann01110 Biosynthesis of secondary metabolites; cann01200 Carbon metabolism; cann01210 2-Oxocarboxylic acid metabolism; cann01230 Biosynthesis of amino acids	PF00694	Aconitase C-terminal domain
Capana07g001441	392	0.461905	Down	0.0143164	K	"ACOC_CUCMA Aconitate hydratase, cytoplasmic OS=Cucurbita maxima PE=2 SV=1"	---	1	1.26205e-92	213.77	EMK(1)SDWHSCLENK	2	-4.8496	21	1.4829	1.50674	1.35156	1.4056	1.41429	1.52683	0.537681	0.799133		0.601351	0.765583	0.709581	1.20095	1.36437	1.3123	1.12243	1.06828	0.837772	0.826325	0.898601		0.45215	0.467078		cytoplasm	GO:0001101 response to acid chemical; GO:0006082 organic acid metabolic process; GO:0006101 citrate metabolic process; GO:0006102 isocitrate metabolic process; GO:0006950 response to stress; GO:0006970 response to osmotic stress; GO:0006979 response to oxidative stress; GO:0007275 multicellular organism development; GO:0008152 metabolic process; GO:0009605 response to external stimulus; GO:000962…	GO:0005618 cell wall; GO:0005622 intracellular; GO:0005623 cell; GO:0005737 cytoplasm; GO:0005739 mitochondrion; GO:0005773 vacuole; GO:0005774 vacuolar membrane; GO:0005829 cytosol; GO:0009507 chloroplast; GO:0009532 plastid stroma; GO:0009536 plastid; GO:0009570 chloroplast stroma; GO:0016020 membrane; GO:0030312 external encapsulating structure; GO:0031090 organelle membrane; GO:0043226 organe…	GO:0000166 nucleotide binding; GO:0003824 catalytic activity; GO:0003994 aconitate hydratase activity; GO:0005488 binding; GO:0005507 copper ion binding; GO:0005524 ATP binding; GO:0008144 drug binding; GO:0016829 lyase activity; GO:0016835 carbon-oxygen lyase activity; GO:0016836 hydro-lyase activity; GO:0017076 purine nucleotide binding; GO:0030554 adenyl nucleotide binding; GO:0032553 ribonucl…	K01681	ACO, acnA; aconitate hydratase [EC:4.2.1.3]	cann00020 Citrate cycle (TCA cycle); cann00630 Glyoxylate and dicarboxylate metabolism; cann01100 Metabolic pathways; cann01110 Biosynthesis of secondary metabolites; cann01200 Carbon metabolism; cann01210 2-Oxocarboxylic acid metabolism; cann01230 Biosynthesis of amino acids	PF00694	Aconitase C-terminal domain
Capana07g001803	486	0.628325	Down	0.00093923	K	"FTSH2_ARATH ATP-dependent zinc metalloprotease FTSH 2, chloroplastic OS=Arabidopsis thaliana GN=FTSH2 PE=1 SV=1"	FTSH2	1	1.75588e-24	174.5	SK(1)SLVAYHEVGHAICGTLTPGHDPVQK	3	-1.9227	25	1.60429	1.44304	1.41752	1.4896	1.50361	1.48941	0.991943	0.938662	0.87477	0.769428		0.852473	1.09023	1.08792	1.11582	0.775027	0.816284	0.711917	0.879656	0.767677	0.845096		0.724518	0.655431	chloroplast	GO:0006091 generation of precursor metabolites and energy; GO:0006508 proteolysis; GO:0006807 nitrogen compound metabolic process; GO:0006996 organelle organization; GO:0008152 metabolic process; GO:0009056 catabolic process; GO:0009057 macromolecule catabolic process; GO:0009314 response to radiation; GO:0009416 response to light stimulus; GO:0009628 response to abiotic stimulus; GO:0009642 resp…	GO:0005622 intracellular; GO:0005623 cell; GO:0005737 cytoplasm; GO:0009507 chloroplast; GO:0009526 plastid envelope; GO:0009534 chloroplast thylakoid; GO:0009535 chloroplast thylakoid membrane; GO:0009536 plastid; GO:0009579 thylakoid; GO:0009941 chloroplast envelope; GO:0016020 membrane; GO:0031967 organelle envelope; GO:0031975 envelope; GO:0031976 plastid thylakoid; GO:0031977 thylakoid lumen…	GO:0003824 catalytic activity; GO:0004176 ATP-dependent peptidase activity; GO:0008233 peptidase activity; GO:0008237 metallopeptidase activity; GO:0016462 pyrophosphatase activity; GO:0016787 hydrolase activity; GO:0016817 hydrolase activity, acting on acid anhydrides; GO:0016818 hydrolase activity, acting on acid anhydrides, in phosphorus-containing anhydrides; GO:0016887 ATPase activity; GO:00…	K03798	ftsH, hflB; cell division protease FtsH [EC:3.4.24.-]		PF00004; PF01434	ATPase family associated with various cellular activities (AAA); Peptidase family M41
Capana07g002059	458	0.502587	Down	0.039216	K	RHM1_ARATH Probable rhamnose biosynthetic enzyme 1 OS=Arabidopsis thaliana GN=RHM1 PE=1 SV=1	RHM1	1	2.40743e-17	165.72	PNVDWCESHK(1)TETIR	3	-7.3437	35	1.19059	1.21899		1.43464	1.5234	1.32849		0.520134	0.690889	0.62848	0.811828		1.0729	1.23995	1.27827	0.761006	0.866235		0.780679		0.834615	0.58426	0.721477		chloroplast	GO:0006139 nucleobase-containing compound metabolic process; GO:0006725 cellular aromatic compound metabolic process; GO:0006793 phosphorus metabolic process; GO:0006807 nitrogen compound metabolic process; GO:0006810 transport; GO:0008152 metabolic process; GO:0009058 biosynthetic process; GO:0009225 nucleotide-sugar metabolic process; GO:0009226 nucleotide-sugar biosynthetic process; GO:0009812…	GO:0005622 intracellular; GO:0005623 cell; GO:0005737 cytoplasm; GO:0005829 cytosol; GO:0005911 cell-cell junction; GO:0009506 plasmodesma; GO:0030054 cell junction; GO:0044424 intracellular part; GO:0044444 cytoplasmic part; GO:0044464 cell part; GO:0055044 symplast;	GO:0003824 catalytic activity; GO:0010280 UDP-L-rhamnose synthase activity; GO:0016829 lyase activity; GO:0016835 carbon-oxygen lyase activity; GO:0016836 hydro-lyase activity; GO:0050377 UDP-glucose 4,6-dehydratase activity;	K12450	RHM; UDP-glucose 4,6-dehydratase [EC:4.2.1.76]	cann00520 Amino sugar and nucleotide sugar metabolism; cann01100 Metabolic pathways	PF04321	RmlD substrate binding domain
Capana07g002128	76	0.495319	Down	0.00151783	K	UBC35_ARATH Ubiquitin-conjugating enzyme E2 35 OS=Arabidopsis thaliana GN=UBC35 PE=1 SV=1	UBC35	1	5.49804e-06	124.46	FLTK(1)IYHPNIDK	2	-5.5867	17	1.07967	1.04651	1.12516	1.07692	1.0585	1.09407		0.577546	0.496089	0.590514	0.698826	0.653516		0.973881	0.913148		0.612865	5.54727		0.404318		0.459962			mitochondria							PF00179	Ubiquitin-conjugating enzyme
Capana07g002194	147	2.31366	Up	0.0025412	K	"TRXM4_ARATH Thioredoxin M4, chloroplastic OS=Arabidopsis thaliana GN=At3g15360 PE=1 SV=2"	At3g15360	1	3.89943e-21	123.42	SIPTVMIFK(1)NGEK	2	-5.6202	50	0.503802	0.68299	0.572067	0.840173	0.90859	0.984979	1.60303	1.21173	1.25464	2.90476	0.481659	2.32897	1.72196	1.21969	0.497273	2.59511	0.254902	1.54987	0.492632			0.473418	0.264403	0.504698	chloroplast				K03671	trxA; thioredoxin 1		PF00085	Thioredoxin
Capana07g002347	334	0.287191	Down	0.0151636	K	C2 domain-containing protein	---	1	3.65092e-14	98.328	ECPTGK(1)NNFGNSESNISESK	2	-1.1291	12		1.18052	1.55576	1.2488	1.37355			0.420202	0.365634			0.575026	1.03168	1.00662	1.29266	0.443172					0.621866				nucleus							PF00168	C2 domain
Capana07g002456	151	1.69314	Up	0.00140182	K	"PGKH_TOBAC Phosphoglycerate kinase, chloroplastic OS=Nicotiana tabacum PE=2 SV=1"	---	1	1.97959e-18	166.71	GVTPK(1)YSLSPLVPR	2	-3.9286	23	0.491304	0.520679	0.535677	0.701657	0.720759	0.738911	0.836293		0.910642	1.48497	0.758824	0.849452	1.48024	0.782306	0.792398	1.60706	1.40469	1.65071	0.929322	0.886492	0.783978	1.58121	1.53902	1.66794	chloroplast	GO:0002682 regulation of immune system process; GO:0002697 regulation of immune effector process; GO:0002831 regulation of response to biotic stimulus; GO:0005975 carbohydrate metabolic process; GO:0006082 organic acid metabolic process; GO:0006090 pyruvate metabolic process; GO:0006091 generation of precursor metabolites and energy; GO:0006096 glycolytic process; GO:0006139 nucleobase-containing…	GO:0005576 extracellular region; GO:0005618 cell wall; GO:0005622 intracellular; GO:0005623 cell; GO:0005634 nucleus; GO:0005737 cytoplasm; GO:0005739 mitochondrion; GO:0005829 cytosol; GO:0009507 chloroplast; GO:0009526 plastid envelope; GO:0009532 plastid stroma; GO:0009536 plastid; GO:0009570 chloroplast stroma; GO:0009579 thylakoid; GO:0009941 chloroplast envelope; GO:0010319 stromule; GO:001…	GO:0003824 catalytic activity; GO:0004672 protein kinase activity; GO:0016301 kinase activity; GO:0016740 transferase activity; GO:0016772 transferase activity, transferring phosphorus-containing groups; GO:0016773 phosphotransferase activity, alcohol group as acceptor;	K00927	PGK, pgk; phosphoglycerate kinase [EC:2.7.2.3]	cann00010 Glycolysis / Gluconeogenesis; cann00710 Carbon fixation in photosynthetic organisms; cann01100 Metabolic pathways; cann01110 Biosynthesis of secondary metabolites; cann01200 Carbon metabolism; cann01230 Biosynthesis of amino acids	PF00162	Phosphoglycerate kinase
Capana08g000222	206	1.51626	Up	0.0176444	K	GDIA_BOVIN Rab GDP dissociation inhibitor alpha OS=Bos taurus GN=GDI1 PE=1 SV=1	GDI1	1	0.00106143	94.66	YLDEPALDTVK(1)R	2	-9.0787	8	0.686691		0.767313	0.750733		1.20878	1.11234		1.09231				1.13368	0.926755											cytoplasm				K17255	GDI1_2; Rab GDP dissociation inhibitor
Capana08g000412	125	0.645216	Down	0.00112492	K	"GLYM_ARATH Serine hydroxymethyltransferase, mitochondrial OS=Arabidopsis thaliana GN=SHM1 PE=1 SV=1"	SHM1	1	2.731e-258	222.25	AVMEAVGSCLTNK(1)YSEGLPGK	2	-0.29563	18	1.23199	1.16461		1.31787	1.49898	1.37988	0.768743	0.804746	0.745998		0.867016	0.858586	1.13682	1.34343	1.21506		0.820717	0.807577		0.830753	0.746611		0.725539		chloroplast		GO:0005622 intracellular; GO:0005623 cell; GO:0005737 cytoplasm; GO:0005739 mitochondrion; GO:0009507 chloroplast; GO:0009532 plastid stroma; GO:0009536 plastid; GO:0009570 chloroplast stroma; GO:0043226 organelle; GO:0043227 membrane-bounded organelle; GO:0043229 intracellular organelle; GO:0043231 intracellular membrane-bounded organelle; GO:0044422 organelle part; GO:0044424 intracellular part…	GO:0003824 catalytic activity; GO:0004372 glycine hydroxymethyltransferase activity; GO:0016740 transferase activity; GO:0016741 transferase activity, transferring one-carbon groups; GO:0016742 hydroxymethyl-, formyl- and related transferase activity;	K00600	glyA, SHMT; glycine hydroxymethyltransferase [EC:2.1.2.1]	cann00260 Glycine, serine and threonine metabolism; cann00460 Cyanoamino acid metabolism; cann00630 Glyoxylate and dicarboxylate metabolism; cann00670 One carbon pool by folate; cann01100 Metabolic pathways; cann01110 Biosynthesis of secondary metabolites; cann01200 Carbon metabolism; cann01230 Biosynthesis of amino acids	PF00464	Serine hydroxymethyltransferase
Capana08g000430	426	0.644861	Down	0.00114104	K	"AAT5_ARATH Aspartate aminotransferase, chloroplastic OS=Arabidopsis thaliana GN=ASP5 PE=1 SV=2"	ASP5	1	4.67775e-84	192.68	AQSESITNK(1)WHVYMTK	2	4.0428	65	1.2963	1.50174	1.49944		2.25664	1.53567	0.912243	0.899782	0.959251	0.797959	0.782299	0.880878		1	0.80297	1.1475	1.19639	1.11228	0.878587	0.936334	0.927015	0.49636	0.529986	0.540271	chloroplast	GO:0006082 organic acid metabolic process; GO:0006103 2-oxoglutarate metabolic process; GO:0006520 cellular amino acid metabolic process; GO:0006531 aspartate metabolic process; GO:0006536 glutamate metabolic process; GO:0006807 nitrogen compound metabolic process; GO:0008152 metabolic process; GO:0009064 glutamine family amino acid metabolic process; GO:0009066 aspartate family amino acid metabo…		GO:0003824 catalytic activity; GO:0004069 L-aspartate:2-oxoglutarate aminotransferase activity; GO:0008483 transaminase activity; GO:0016740 transferase activity; GO:0016769 transferase activity, transferring nitrogenous groups;	K00811	ASP5; aspartate aminotransferase, chloroplastic [EC:2.6.1.1]	cann00220 Arginine biosynthesis; cann00250 Alanine, aspartate and glutamate metabolism; cann00270 Cysteine and methionine metabolism; cann00330 Arginine and proline metabolism; cann00350 Tyrosine metabolism; cann00360 Phenylalanine metabolism; cann00400 Phenylalanine, tyrosine and tryptophan biosynthesis; cann00950 Isoquinoline alkaloid biosynthesis; cann00960 Tropane, piperidine and pyridine alk…	PF00155	Aminotransferase class I and II
Capana08g000503	293	0.462161	Down	0.00022206	K	PSA_MOUSE Puromycin-sensitive aminopeptidase OS=Mus musculus GN=Npepps PE=1 SV=2	Npepps	1	1.54392e-06	119.43	ETALLYDDK(1)HSAAANK	2	3.7448	29	1.33793	1.58185	1.35674	1.27281	1.3618	1.1166	0.692369	0.656977	0.627094	0.723077	0.837104	0.7711	0.816585	1.01144	1.01929	0.905579	0.924399	0.88665	0.641997	0.733607	0.699915	0.412541			cytoplasm	GO:0001666 response to hypoxia; GO:0006508 proteolysis; GO:0006518 peptide metabolic process; GO:0006807 nitrogen compound metabolic process; GO:0006810 transport; GO:0006950 response to stress; GO:0008152 metabolic process; GO:0009056 catabolic process; GO:0009628 response to abiotic stimulus; GO:0009914 hormone transport; GO:0009926 auxin polar transport; GO:0009987 cellular process; GO:0010817…	GO:0005622 intracellular; GO:0005623 cell; GO:0005737 cytoplasm; GO:0005829 cytosol; GO:0005886 plasma membrane; GO:0016020 membrane; GO:0031090 organelle membrane; GO:0043226 organelle; GO:0043227 membrane-bounded organelle; GO:0044422 organelle part; GO:0044424 intracellular part; GO:0044444 cytoplasmic part; GO:0044464 cell part; GO:0071944 cell periphery;	GO:0003824 catalytic activity; GO:0004177 aminopeptidase activity; GO:0005488 binding; GO:0008144 drug binding; GO:0008233 peptidase activity; GO:0008235 metalloexopeptidase activity; GO:0008237 metallopeptidase activity; GO:0008238 exopeptidase activity; GO:0008270 zinc ion binding; GO:0010013 N-1-naphthylphthalamic acid binding; GO:0016787 hydrolase activity; GO:0031406 carboxylic acid binding;…	K08776	NPEPPS; puromycin-sensitive aminopeptidase [EC:3.4.11.-]		PF01433; PF11838	Peptidase family M1; Domain of unknown function (DUF3358)
Capana08g000542	260	0.644619	Down	0.0076168	K	EF2_BETVU Elongation factor 2 OS=Beta vulgaris PE=2 SV=1	---	1	7.38907e-12	128.41	WTTK(1)STGTASCK	2	-7.3976	19	1.24653	0.938701	1.04637		1.22412	1.13648	0.668735	0.682692	0.731727	0.558879		0.610568	1.59888	1.53733	1.69405	0.892689		1.32867	0.647059	0.583789		0.408451			cytoplasm				K03234	EEF2; elongation factor 2		PF00009; PF03144; PF03764; PF00679	Elongation factor Tu GTP binding domain; Elongation factor Tu domain 2; Elongation factor G, domain IV; Elongation factor G C-terminus
Capana08g000545	632	0.66458	Down	8.0641e-05	K	EF2_BETVU Elongation factor 2 OS=Beta vulgaris PE=2 SV=1	---	0.999999	1.22632e-22	166.71	ILAEEFGWDKDLAK(1)K	2	-0.63271	29	1.36347	1.35796	1.32468	1.41077	1.33681	1.35261	0.927642	0.857143	0.904177	0.675337	0.660488	0.664734	0.981172	0.894845	0.95625	0.715556	0.66077	0.659375	0.77213		0.769231		0.554878		cytoplasm				K03234	EEF2; elongation factor 2		PF00009; PF03144; PF03764; PF00679	Elongation factor Tu GTP binding domain; Elongation factor Tu domain 2; Elongation factor G, domain IV; Elongation factor G C-terminus
Capana08g000663	218	1.52218	Up	0.045877	K	Galactose-binding domain-like protein	---	1	1.02424e-62	180.81	YLDSDHFSVPHGK(1)R	2	-5.179	70	0.54085	0.577371	0.875392	0.71346	0.892187	1.07	1.00113	1.07684	0.956667	0.856905	1.0638	1.10767	1.15376	1.24327	1.015	1.09408	0.774194	0.842881	1.02647	0.96997	1.19789	1.29386	1.34474	1.41212	cytoskeleton							PF04862	Protein of unknown function, DUF642
Capana08g000936	454	0.379267	Down	0.0054795	K	GPAT4_ARATH Glycerol-3-phosphate acyltransferase 4 OS=Arabidopsis thaliana GN=GPAT4 PE=1 SV=1	GPAT4	1	1.85458e-23	152.23	AGGK(1)TSIEVANHVQK	2	-4.6684	25	1.22658	1.32325	0.999147	1.1658	1.51964	1.17953	0.581921	0.430108	0.333981				1.00089	1.43538	1.19545	0.547023	0.749094	0.771218		0.760046			0.179157		plasma membrane	GO:0006793 phosphorus metabolic process; GO:0006796 phosphate-containing compound metabolic process; GO:0008152 metabolic process; GO:0009058 biosynthetic process; GO:0009059 macromolecule biosynthetic process; GO:0009987 cellular process; GO:0010143 cutin biosynthetic process; GO:0016311 dephosphorylation; GO:0043170 macromolecule metabolic process; GO:0044237 cellular metabolic process; GO:0071…	GO:0005622 intracellular; GO:0005623 cell; GO:0005737 cytoplasm; GO:0005783 endoplasmic reticulum; GO:0012505 endomembrane system; GO:0016020 membrane; GO:0043226 organelle; GO:0043227 membrane-bounded organelle; GO:0043229 intracellular organelle; GO:0043231 intracellular membrane-bounded organelle; GO:0044424 intracellular part; GO:0044444 cytoplasmic part; GO:0044464 cell part;	GO:0003824 catalytic activity; GO:0008374 O-acyltransferase activity; GO:0016740 transferase activity; GO:0016746 transferase activity, transferring acyl groups; GO:0016747 transferase activity, transferring acyl groups other than amino-acyl groups; GO:0016787 hydrolase activity; GO:0016788 hydrolase activity, acting on ester bonds; GO:0016791 phosphatase activity; GO:0042578 phosphoric ester hyd…	K13508	GPAT; glycerol-3-phosphate acyltransferase [EC:2.3.1.15 2.3.1.198]	cann00561 Glycerolipid metabolism; cann00564 Glycerophospholipid metabolism; cann01100 Metabolic pathways; cann01110 Biosynthesis of secondary metabolites
Capana08g001094	269	2.9067	Up	0.020758	K	K0664_DICDI Protein KIAA0664 homolog OS=Dictyostelium discoideum GN=cluA PE=1 SV=2	cluA	1	4.14381e-07	118.06	NK(1)FGNLPYGFR	2	-2.4186	15	0.334234		0.378336	0.556136	0.773272	1.01586		1.18173	0.889493	1.12238			1.52838			1.20366	1.40107	1.29604	0.676863		0.464				nucleus				K03255	TIF31, CLU1; protein TIF31
Capana08g001242	39	0.658776	Down	4.2328e-05	K	PFD4_ARATH Probable prefoldin subunit 4 OS=Arabidopsis thaliana GN=AIP3 PE=1 SV=3	AIP3	1	2.472e-12	154.66	LHELHDEIK(1)TAK	3	-5.5803	34	1.13739	1.10764	1.14286	0.782464	0.752542	0.864989	0.749448	0.765909	0.716501	0.86859		0.893424	1.14373	0.926278	1.31242	0.591611	0.848993	1.08353	1.15427		1.17837	1.42447	1.35703	1.23974	nucleus	GO:0006457 protein folding; GO:0009987 cellular process;	GO:0005622 intracellular; GO:0005623 cell; GO:0005737 cytoplasm; GO:0005829 cytosol; GO:0016272 prefoldin complex; GO:0032991 macromolecular complex; GO:0044424 intracellular part; GO:0044444 cytoplasmic part; GO:0044464 cell part;	GO:0005488 binding; GO:0005515 protein binding; GO:0051087 chaperone binding;	K09550	PFDN4; prefoldin subunit 4
Capana08g001246	230	1.65963	Up	0.0067028	K	"GME1_ORYSJ GDP-mannose 3,5-epimerase 1 OS=Oryza sativa subsp. japonica GN=GME-1 PE=1 SV=1"	GME-1	1	4.6313e-31	129.04	AQTATDK(1)FEMWGDGLQTR	2	4.8048	31	0.586652	0.707527	0.630631	0.810277	0.984267	0.894995	1.17014	1.12269	0.901639	0.990343	0.784424	0.986547	1.02435	0.906191	0.803588	2.00098	1.20865	1.31615			1.49144	1.06866	0.649701	0.713467	cytoskeleton	GO:0005975 carbohydrate metabolic process; GO:0005996 monosaccharide metabolic process; GO:0006082 organic acid metabolic process; GO:0006732 coenzyme metabolic process; GO:0006766 vitamin metabolic process; GO:0006767 water-soluble vitamin metabolic process; GO:0008152 metabolic process; GO:0009058 biosynthetic process; GO:0009108 coenzyme biosynthetic process; GO:0009110 vitamin biosynthetic pr…	GO:0005622 intracellular; GO:0005623 cell; GO:0005737 cytoplasm; GO:0005829 cytosol; GO:0044424 intracellular part; GO:0044444 cytoplasmic part; GO:0044464 cell part;	GO:0000166 nucleotide binding; GO:0003824 catalytic activity; GO:0005488 binding; GO:0016853 isomerase activity; GO:0016854 racemase and epimerase activity; GO:0016857 racemase and epimerase activity, acting on carbohydrates and derivatives; GO:0036094 small molecule binding; GO:0047918 GDP-mannose 3,5-epimerase activity; GO:0048037 cofactor binding; GO:0050662 coenzyme binding; GO:0051287 NAD bi…	K10046	GME; GDP-D-mannose 3', 5'-epimerase [EC:5.1.3.18 5.1.3.-]	cann00053 Ascorbate and aldarate metabolism; cann00520 Amino sugar and nucleotide sugar metabolism; cann01100 Metabolic pathways; cann01110 Biosynthesis of secondary metabolites
Capana08g001246	47	0.645587	Down	0.027762	K	"GME1_ORYSJ GDP-mannose 3,5-epimerase 1 OS=Oryza sativa subsp. japonica GN=GME-1 PE=1 SV=1"	GME-1	1	1.38575e-46	189.13	LK(1)SEGHYIIASDWK	2	-4.1491	43	1.10764	1.43656	1.19219	1.18478	1.40806	1.1845	0.847964	0.760148			0.941309	0.931614	1.01685	1.33771	1.27384	0.922776	0.841346	0.831712	0.760797	0.758134	0.776231	0.771144	0.907186	0.812798	cytoskeleton	GO:0005975 carbohydrate metabolic process; GO:0005996 monosaccharide metabolic process; GO:0006082 organic acid metabolic process; GO:0006732 coenzyme metabolic process; GO:0006766 vitamin metabolic process; GO:0006767 water-soluble vitamin metabolic process; GO:0008152 metabolic process; GO:0009058 biosynthetic process; GO:0009108 coenzyme biosynthetic process; GO:0009110 vitamin biosynthetic pr…	GO:0005622 intracellular; GO:0005623 cell; GO:0005737 cytoplasm; GO:0005829 cytosol; GO:0044424 intracellular part; GO:0044444 cytoplasmic part; GO:0044464 cell part;	GO:0000166 nucleotide binding; GO:0003824 catalytic activity; GO:0005488 binding; GO:0016853 isomerase activity; GO:0016854 racemase and epimerase activity; GO:0016857 racemase and epimerase activity, acting on carbohydrates and derivatives; GO:0036094 small molecule binding; GO:0047918 GDP-mannose 3,5-epimerase activity; GO:0048037 cofactor binding; GO:0050662 coenzyme binding; GO:0051287 NAD bi…	K10046	GME; GDP-D-mannose 3', 5'-epimerase [EC:5.1.3.18 5.1.3.-]	cann00053 Ascorbate and aldarate metabolism; cann00520 Amino sugar and nucleotide sugar metabolism; cann01100 Metabolic pathways; cann01110 Biosynthesis of secondary metabolites
Capana08g001512	218	2.15254	Up	0.0066248	K	XTH_TOBAC Probable xyloglucan endotransglucosylase/hydrolase protein OS=Nicotiana tabacum GN=XTH PE=2 SV=1	XTH	1	3.72949e-26	175.64	QK(1)YTVYNYCTDK(1)AR	2	7.2748	43	0.465313	0.669543	0.752932	1.15317	1.19292	1.8802	1.26724	1.47328	1.32302	1.08749	0.895756	1.35589	1.47336	1.11546	1.0599	1.2181	0.847795	1.11576	1.06997	0.839378		0.412096	0.452302	0.448585	extracellular				K08235	E2.4.1.207; xyloglucan:xyloglucosyl transferase [EC:2.4.1.207]		PF00722	Glycosyl hydrolases family 16
Capana08g001525	248	2.55801	Up	0.0018767	K	"CLPR3_ARATH ATP-dependent Clp protease proteolytic subunit-related protein 3, chloroplastic OS=Arabidopsis thaliana GN=CLPR3 PE=1 SV=1"	CLPR3	1	1.82108e-53	251.02	LLAK(1)HTENSEETVANAMR	2	-2.2792	31	0.477509	0.496124	0.566492	1.15155	1.49009			1.41884	1.2076	1.17324		1.03625	1.24259	0.815451	1.29574	0.637331	0.571865	0.82487			1.25437	1.48061			chloroplast							PF00574	Clp protease
Capana08g001550	56	0.652427	Down	0.026801	K	RL182_ARATH 60S ribosomal protein L18-2 OS=Arabidopsis thaliana GN=RPL18B PE=1 SV=2	RPL18B	1	4.79614e-06	135.21	LFMSK(1)TNKPPLSLSR	2	-1.4131	13		1.19087	0.986653			1.05805	0.792437	0.693772	0.644804					1.16757			0.821399	0.911403		0.881974					nucleus				K02883	RP-L18e, RPL18; large subunit ribosomal protein L18e	cann03010 Ribosome
Capana08g001595	80	0.631971	Down	0.0199356	K	PDIA6_MEDSA Probable protein disulfide-isomerase A6 OS=Medicago sativa PE=2 SV=1	---	1	1.69459e-11	135.28	SILIGK(1)VDCDEHK	2	-5.6526	24	1.26915	1.29128	1.28119	1.51369	1.39061	1.39895	0.909207	0.723714	0.794872	0.912684	0.935194	0.883888	1.11333	1.21616	1.17479	0.805076	0.902305	0.858316	0.792247	0.879293	0.871694	0.727696	0.782756	0.796422	chloroplast	GO:0000003 reproduction; GO:0003006 developmental process involved in reproduction; GO:0006457 protein folding; GO:0006950 response to stress; GO:0007275 multicellular organism development; GO:0009553 embryo sac development; GO:0009566 fertilization; GO:0009567 double fertilization forming a zygote and endosperm; GO:0009790 embryo development; GO:0009791 post-embryonic development; GO:0009793 emb…	GO:0005618 cell wall; GO:0005622 intracellular; GO:0005623 cell; GO:0005737 cytoplasm; GO:0005773 vacuole; GO:0005774 vacuolar membrane; GO:0005783 endoplasmic reticulum; GO:0009505 plant-type cell wall; GO:0012505 endomembrane system; GO:0016020 membrane; GO:0030312 external encapsulating structure; GO:0031090 organelle membrane; GO:0043226 organelle; GO:0043227 membrane-bounded organelle; GO:00…	GO:0003756 protein disulfide isomerase activity; GO:0003824 catalytic activity; GO:0016853 isomerase activity; GO:0016860 intramolecular oxidoreductase activity; GO:0016864 intramolecular oxidoreductase activity, transposing S-S bonds;	K09584	PDIA6, TXNDC7; protein disulfide-isomerase A6 [EC:5.3.4.1]	cann04141 Protein processing in endoplasmic reticulum	PF00085; PF07749	Thioredoxin; Endoplasmic reticulum protein ERp29, C-terminal domain
Capana08g001599	155	1.79221	Up	0.00029816	K	DLDH_SYNY3 Dihydrolipoyl dehydrogenase OS=Synechocystis sp. (strain PCC 6803 / Kazusa) GN=lpdA PE=1 SV=3	lpdA	1	1.5988e-126	208.82	ELQNEHHMK(1)SFGLQVAAAGYDR	3	-6.1541	24	0.876827	0.964013	0.839876	0.971793	0.882248	0.862602	1.5126	1.63858	1.65322	0.8	0.813707	1.00774	0.917722	1.00742	0.852391	0.952756	0.906358	0.893709	0.904875	0.915995	0.933905	0.959696	1.05632	0.990819	chloroplast				K00382	DLD, lpd, pdhD; dihydrolipoamide dehydrogenase [EC:1.8.1.4]	cann00010 Glycolysis / Gluconeogenesis; cann00020 Citrate cycle (TCA cycle); cann00260 Glycine, serine and threonine metabolism; cann00280 Valine, leucine and isoleucine degradation; cann00310 Lysine degradation; cann00380 Tryptophan metabolism; cann00620 Pyruvate metabolism; cann00630 Glyoxylate and dicarboxylate metabolism; cann00640 Propanoate metabolism; cann01100 Metabolic pathways; cann0111…	PF07992; PF02852	Pyridine nucleotide-disulphide oxidoreductase; Pyridine nucleotide-disulphide oxidoreductase, dimerisation domain
Capana08g001658	265	1.55787	Up	0.00036392	K	METK1_SOLTU S-adenosylmethionine synthase 1 OS=Solanum tuberosum GN=METK1 PE=2 SV=1	METK1	1	0.000169295	99.174	EHVIK(1)PVIPEK	2	-7.9472	17	0.726039	0.733453	0.694043	0.719444	0.879412	1.05657	1.13476	1.10185		1.06334	0.942649	1.18805	1.01025			0.836147	0.790763		1.07444				1.67292	1.6235	cytoplasm		GO:0005622 intracellular; GO:0005623 cell; GO:0005737 cytoplasm; GO:0005829 cytosol; GO:0044424 intracellular part; GO:0044444 cytoplasmic part; GO:0044464 cell part;	GO:0003824 catalytic activity; GO:0004478 methionine adenosyltransferase activity; GO:0016740 transferase activity; GO:0016765 transferase activity, transferring alkyl or aryl (other than methyl) groups;	K00789	metK; S-adenosylmethionine synthetase [EC:2.5.1.6]	cann00270 Cysteine and methionine metabolism; cann01100 Metabolic pathways; cann01110 Biosynthesis of secondary metabolites; cann01230 Biosynthesis of amino acids	PF00438; PF02772; PF02773	S-adenosylmethionine synthetase, N-terminal domain; S-adenosylmethionine synthetase, central domain; S-adenosylmethionine synthetase, C-terminal domain
Capana08g001908	66	0.576594	Down	0.0007019	K	Putative ovule protein	---	1	0.000161062	115.86	TSCTSPK(1)STR	2	-7.2012	23	1.58922	1.44743	1.51661	1.44287	1.28476	1.25337	0.892384		0.857868	0.712025	1.13743	1.05427	2.13687	1.33	1.48057	0.885284	0.732394	0.947696	0.835206	0.720102	0.965924	0.468477	0.424059	0.473394	chloroplast							PF06232	Embryo-specific protein 3, (ATS3)
Capana08g001920	472	0.622839	Down	8.2891e-05	K	AKR2_ARATH Ankyrin repeat domain-containing protein 2 OS=Arabidopsis thaliana GN=AKR2 PE=1 SV=2	AKR2	1	1.1777e-247	269.28	NK(1)NTALHYAAGYGR	2	-5.9779	47	1.17867	1.25309	1.28467	1.45554	1.42553	1.18738	0.778404	0.750228	0.786101	0.841683	0.894535	0.829724	1.1891	1.3615	1.26327	0.711614	0.805785	0.843685	0.709787	0.819913	0.821691	1.05627	0.975774	0.894133	chloroplast	GO:0000038 very long-chain fatty acid metabolic process; GO:0006082 organic acid metabolic process; GO:0006629 lipid metabolic process; GO:0006631 fatty acid metabolic process; GO:0006633 fatty acid biosynthetic process; GO:0006643 membrane lipid metabolic process; GO:0006665 sphingolipid metabolic process; GO:0006807 nitrogen compound metabolic process; GO:0008152 metabolic process; GO:0008610 l…	GO:0005622 intracellular; GO:0005623 cell; GO:0005737 cytoplasm; GO:0005783 endoplasmic reticulum; GO:0005789 endoplasmic reticulum membrane; GO:0012505 endomembrane system; GO:0016020 membrane; GO:0016021 integral component of membrane; GO:0030176 integral component of endoplasmic reticulum membrane; GO:0031224 intrinsic component of membrane; GO:0031227 intrinsic component of endoplasmic reticu…	GO:0003824 catalytic activity; GO:0004312 fatty acid synthase activity; GO:0009922 fatty acid elongase activity; GO:0016740 transferase activity; GO:0016746 transferase activity, transferring acyl groups; GO:0016747 transferase activity, transferring acyl groups other than amino-acyl groups;
Capana08g002001	311	0.592991	Down	0.000121662	K	XYL2_MEDSV Beta-xylosidase/alpha-L-arabinofuranosidase 2 OS=Medicago sativa subsp. varia GN=Xyl2 PE=2 SV=1	Xyl2	1	3.55777e-76	173.15	NQLYGNLGPK(1)DVCTQEHQELAR	3	-1.6316	48	1.52126	1.6023	1.4265	1.7699	1.84834	1.77087	0.888087	0.919336	0.890717	0.804688	0.789054	0.748591	1.40408	1.31526	1.34826	0.804928	0.7322	0.740944	0.693151	0.686649	0.659892	0.421687	0.43875	0.395719	cytoplasm	GO:0000272 polysaccharide catabolic process; GO:0002376 immune system process; GO:0005975 carbohydrate metabolic process; GO:0005976 polysaccharide metabolic process; GO:0006950 response to stress; GO:0006952 defense response; GO:0006955 immune response; GO:0008152 metabolic process; GO:0009056 catabolic process; GO:0009057 macromolecule catabolic process; GO:0009605 response to external stimulus…	GO:0005576 extracellular region; GO:0005618 cell wall; GO:0005623 cell; GO:0030312 external encapsulating structure; GO:0044464 cell part; GO:0048046 apoplast; GO:0071944 cell periphery;	GO:0003824 catalytic activity; GO:0004553 hydrolase activity, hydrolyzing O-glycosyl compounds; GO:0009044 xylan 1,4-beta-xylosidase activity; GO:0016787 hydrolase activity; GO:0016798 hydrolase activity, acting on glycosyl bonds; GO:0046556 alpha-L-arabinofuranosidase activity; GO:0097599 xylanase activity;	K15920	XYL4; xylan 1,4-beta-xylosidase [EC:3.2.1.37]	cann00520 Amino sugar and nucleotide sugar metabolism; cann01100 Metabolic pathways	PF00933; PF01915	Glycosyl hydrolase family 3 N terminal domain; Glycosyl hydrolase family 3 C-terminal domain
Capana08g002012	229	1.57822	Up	0.021657	K	"CB4A_SOLLC Chlorophyll a-b binding protein CP24 10A, chloroplastic OS=Solanum lycopersicum GN=CAP10A PE=3 SV=1"	CAP10A	1	0.00046049	106.93	LAEIK(1)HAR	2	-1.9298	60	0.702944	0.745862	0.986747	0.860921	1.00526	1.21595	1.44812	1.13233	1.26338	1.28473	1.56163	0.025278	0.947808	0.942391	0.985792	0.584278	0.677835	0.875248	0.876151	1.10549	1.16057	1.75269		1.43959	chloroplast	GO:0006091 generation of precursor metabolites and energy; GO:0008152 metabolic process; GO:0009314 response to radiation; GO:0009416 response to light stimulus; GO:0009628 response to abiotic stimulus; GO:0009765 photosynthesis, light harvesting; GO:0009768 photosynthesis, light harvesting in photosystem I; GO:0009987 cellular process; GO:0015979 photosynthesis; GO:0019684 photosynthesis, light …	GO:0005622 intracellular; GO:0005623 cell; GO:0005737 cytoplasm; GO:0009507 chloroplast; GO:0009526 plastid envelope; GO:0009532 plastid stroma; GO:0009534 chloroplast thylakoid; GO:0009535 chloroplast thylakoid membrane; GO:0009536 plastid; GO:0009570 chloroplast stroma; GO:0009579 thylakoid; GO:0009941 chloroplast envelope; GO:0010287 plastoglobule; GO:0016020 membrane; GO:0031967 organelle env…	GO:0005488 binding; GO:0016168 chlorophyll binding; GO:0031409 pigment binding; GO:0043167 ion binding; GO:0043168 anion binding; GO:0046906 tetrapyrrole binding; GO:0048037 cofactor binding; GO:0097159 organic cyclic compound binding; GO:1901363 heterocyclic compound binding;	K08917	LHCB6; light-harvesting complex II chlorophyll a/b binding protein 6	cann00196 Photosynthesis - antenna proteins; cann01100 Metabolic pathways
Capana08g002330	260	0.559009	Down	0.00023939	K	UFOG7_FRAAN UDP-glucose flavonoid 3-O-glucosyltransferase 7 OS=Fragaria ananassa GN=GT7 PE=1 SV=1	GT7	1	2.42184e-23	146.34	HECLK(1)WLDSK	2	-12.482	36	1.80523	1.57459	1.68296	2.25307	2.39384	2.34253	0.939645	0.904762	0.98573	0.719388	0.702174	0.739812	1.1185	1.17716	1.00643	0.768067	0.753611	0.713693	0.659836	0.570025	0.634064	0.527856		0.501866	chloroplast				K23260	cann00940 Phenylpropanoid biosynthesis; cann01110 Biosynthesis of secondary metabolites
Capana08g002563	264	0.580517	Down	0.004036	K	"DCDA1_ARATH Diaminopimelate decarboxylase 1, chloroplastic OS=Arabidopsis thaliana GN=LYSA1 PE=1 SV=1"	LYSA1	1	3.265e-101	220.06	LVGAHCHLGSTITK(1)VDIFR	3	-8.5507	22	1.42218	1.22171	1.28015	1.399	1.45404	1.56067	0.723978	0.794669		0.812636	0.795143	0.859358	1.32079	1.19877	1.29958	0.776833	0.889764	0.756952	0.68645		0.595838	0.514381	0.504782	0.459106	chloroplast		GO:0005622 intracellular; GO:0005623 cell; GO:0005737 cytoplasm; GO:0005829 cytosol; GO:0009507 chloroplast; GO:0009532 plastid stroma; GO:0009536 plastid; GO:0009570 chloroplast stroma; GO:0043226 organelle; GO:0043227 membrane-bounded organelle; GO:0043229 intracellular organelle; GO:0043231 intracellular membrane-bounded organelle; GO:0044422 organelle part; GO:0044424 intracellular part; GO:0…		K01586	lysA; diaminopimelate decarboxylase [EC:4.1.1.20]	cann00300 Lysine biosynthesis; cann01100 Metabolic pathways; cann01110 Biosynthesis of secondary metabolites; cann01230 Biosynthesis of amino acids	PF02784	Pyridoxal-dependent decarboxylase, pyridoxal binding domain
Capana08g002624	407	0.637315	Down	0.00138449	K	"ALFC2_ARATH Probable fructose-bisphosphate aldolase 2, chloroplastic OS=Arabidopsis thaliana GN=FBA2 PE=1 SV=2"	FBA2	1	3.1777e-166	279.51	YTGEGESDEAK(1)QK	2	0.17657	60	1.4401	1.26683	1.37948	1.47668	1.39457	1.33007	0.940604	0.849856	0.813865	0.888489	1.02826	0.079444	1.24458	1.2621	1.26096	0.979616	0.848387	0.901656	0.842495	0.762525	0.926108	0.802019	0.807547	0.938373	chloroplast				K01623	ALDO; fructose-bisphosphate aldolase, class I [EC:4.1.2.13]	cann00010 Glycolysis / Gluconeogenesis; cann00030 Pentose phosphate pathway; cann00051 Fructose and mannose metabolism; cann00710 Carbon fixation in photosynthetic organisms; cann01100 Metabolic pathways; cann01110 Biosynthesis of secondary metabolites; cann01200 Carbon metabolism; cann01230 Biosynthesis of amino acids	PF00274	Fructose-bisphosphate aldolase class-I
Capana08g002681	152	0.611261	Down	3.5142e-05	K	"TPIC_SPIOL Triosephosphate isomerase, chloroplastic OS=Spinacia oleracea GN=TPIP1 PE=1 SV=1"	TPIP1	1	2.00278e-73	196.38	DLGCK(1)WVILGHSER	2	-1.5879	29	1.2922	1.30142	1.23495	1.28142	1.34589	1.30831	0.790419	0.795431	0.754403	0.832432	0.891621	0.842009	1.26982	1.21924	1.25206	1.08266	1.04773	1.11124	0.871036	0.906048	0.781855	0.815468	0.834117	0.805118	chloroplast	GO:0000003 reproduction; GO:0005975 carbohydrate metabolic process; GO:0005996 monosaccharide metabolic process; GO:0006006 glucose metabolic process; GO:0006066 alcohol metabolic process; GO:0006071 glycerol metabolic process; GO:0006081 cellular aldehyde metabolic process; GO:0006082 organic acid metabolic process; GO:0006090 pyruvate metabolic process; GO:0006091 generation of precursor metabo…	GO:0005576 extracellular region; GO:0005622 intracellular; GO:0005623 cell; GO:0005737 cytoplasm; GO:0005739 mitochondrion; GO:0005829 cytosol; GO:0009507 chloroplast; GO:0009526 plastid envelope; GO:0009532 plastid stroma; GO:0009536 plastid; GO:0009570 chloroplast stroma; GO:0009579 thylakoid; GO:0009941 chloroplast envelope; GO:0031967 organelle envelope; GO:0031975 envelope; GO:0043226 organe…	GO:0003824 catalytic activity; GO:0004807 triose-phosphate isomerase activity; GO:0016853 isomerase activity; GO:0016860 intramolecular oxidoreductase activity; GO:0016861 intramolecular oxidoreductase activity, interconverting aldoses and ketoses;	K01803	TPI, tpiA; triosephosphate isomerase (TIM) [EC:5.3.1.1]	cann00010 Glycolysis / Gluconeogenesis; cann00051 Fructose and mannose metabolism; cann00562 Inositol phosphate metabolism; cann00710 Carbon fixation in photosynthetic organisms; cann01100 Metabolic pathways; cann01110 Biosynthesis of secondary metabolites; cann01200 Carbon metabolism; cann01230 Biosynthesis of amino acids	PF00121	Triosephosphate isomerase
Capana08g002743	22	2.91901	Up	0.00054306	K	DHGY_CUCSA Glycerate dehydrogenase OS=Cucumis sativus GN=HPR-A PE=2 SV=1	HPR-A	1	1.17501e-08	159.93	VVSTK(1)SMPGTR	2	-6.7936	23	0.349899	0.496815	0.449389	1.21468	0.956132	1.0212	1.26242	1.2048	1.31612	1.21718	0.674272	1.22232	1.1875	0.764995		1.34893	1.14495	0.75162	1.1936		1.13324	0.874109		1.29138	cytoplasm	GO:0001101 response to acid chemical; GO:0006950 response to stress; GO:0007154 cell communication; GO:0008152 metabolic process; GO:0009314 response to radiation; GO:0009414 response to water deprivation; GO:0009415 response to water; GO:0009416 response to light stimulus; GO:0009605 response to external stimulus; GO:0009628 response to abiotic stimulus; GO:0009853 photorespiration; GO:0009854 o…	GO:0005576 extracellular region; GO:0005622 intracellular; GO:0005623 cell; GO:0005737 cytoplasm; GO:0005777 peroxisome; GO:0005829 cytosol; GO:0009507 chloroplast; GO:0009536 plastid; GO:0042579 microbody; GO:0043226 organelle; GO:0043227 membrane-bounded organelle; GO:0043229 intracellular organelle; GO:0043231 intracellular membrane-bounded organelle; GO:0044424 intracellular part; GO:0044444 …	GO:0003676 nucleic acid binding; GO:0003723 RNA binding; GO:0003727 single-stranded RNA binding; GO:0003824 catalytic activity; GO:0005488 binding; GO:0008187 poly-pyrimidine tract binding; GO:0008266 poly(U) RNA binding; GO:0008465 glycerate dehydrogenase activity; GO:0016491 oxidoreductase activity; GO:0016614 oxidoreductase activity, acting on CH-OH group of donors; GO:0016616 oxidoreductase a…	K15893	HPR1; hydroxypyruvate reductase 1	cann00260 Glycine, serine and threonine metabolism; cann00630 Glyoxylate and dicarboxylate metabolism; cann01100 Metabolic pathways; cann01110 Biosynthesis of secondary metabolites; cann01200 Carbon metabolism	PF00389	D-isomer specific 2-hydroxyacid dehydrogenase, catalytic domain
Capana08g002745	62	0.662812	Down	0.0087803	K	SKP1B_ARATH SKP1-like protein 1B OS=Arabidopsis thaliana GN=SKP1B PE=1 SV=1	SKP1B	1	0.00501838	93.467	K(1)HVDAGAK	2	0.63374	18	1.13891	1.20367		1.52717	1.5435	0.607264	0.76878	0.713115	0.84714		0.801184	0.892576	1.3675	1.36889	1.23899	0.588757				0.86824			0.762287		nucleus				K03094	SKP1, CBF3D; S-phase kinase-associated protein 1	cann04120 Ubiquitin mediated proteolysis; cann04141 Protein processing in endoplasmic reticulum	PF03931; PF01466	Skp1 family, tetramerisation domain; Skp1 family, dimerisation domain
Capana08g002809	196	0.490603	Down	0.0021024	K	NmrA domain-containing protein	---	1	1.09693e-07	115.35	HPEVPLMEIK(1)HCTEK	3	-6.5925	14	1.31653	1.18053	1.18975	1.37534	1.17736	1.34414	0.693182	0.5	0.615578				1.14417	0.950506	0.700106		0.638221	0.570792							chloroplast
Capana09g000010	62	0.522791	Down	0.00059894	K	Putative chaperon P13.9	---	1	5.36361e-28	183.57	ATDSDKDTK(1)VR	2	-6.8993	24	1.2859	1.34237	1.51819	1.04388	1.1924	1.04523	0.715168	0.672414	0.780148	0.895349	1.17818	1.18896	1.53532	1.57165	1.82263	0.749179	0.884024	0.872189	0.952423	0.928191	0.923643	0.689913	0.775288	0.906524	chloroplast
Capana09g000217	104	0.546481	Down	0.0029798	K	ANM11_ARATH Protein arginine N-methyltransferase 1.1 OS=Arabidopsis thaliana GN=PRMT11 PE=1 SV=1	PRMT11	1	3.01092e-06	103.76	TYQNVIYK(1)NSFLFK	2	6.2525	13	1.36842	1.31045		1.00799	0.826803	1.03905	0.80724	0.682474	0.706215	0.855191	0.739261	0.69962				0.534926				0.699557					endoplasmic reticulum	GO:0006325 chromatin organization; GO:0006355 regulation of transcription, DNA-templated; GO:0006464 cellular protein modification process; GO:0006479 protein methylation; GO:0006807 nitrogen compound metabolic process; GO:0006996 organelle organization; GO:0008152 metabolic process; GO:0008213 protein alkylation; GO:0009889 regulation of biosynthetic process; GO:0009987 cellular process; GO:0010…	GO:0005622 intracellular; GO:0005623 cell; GO:0005634 nucleus; GO:0005737 cytoplasm; GO:0005829 cytosol; GO:0043226 organelle; GO:0043227 membrane-bounded organelle; GO:0043229 intracellular organelle; GO:0043231 intracellular membrane-bounded organelle; GO:0044424 intracellular part; GO:0044444 cytoplasmic part; GO:0044464 cell part;	GO:0003824 catalytic activity; GO:0008168 methyltransferase activity; GO:0008170 N-methyltransferase activity; GO:0008276 protein methyltransferase activity; GO:0008469 histone-arginine N-methyltransferase activity; GO:0008757 S-adenosylmethionine-dependent methyltransferase activity; GO:0016273 arginine N-methyltransferase activity; GO:0016274 protein-arginine N-methyltransferase activity; GO:00…	K11434	PRMT1; type I protein arginine methyltransferase [EC:2.1.1.319]
Capana09g000691	28	2.53413	Up	0.00079583	K	P1_ARATH NADP-dependent alkenal double bond reductase P1 OS=Arabidopsis thaliana GN=P1 PE=1 SV=1	P1	1	1.10315e-09	164.56	HYVTGYLNESDMELK(1)NSTIK	3	-2.5245	24	0.61978	0.585526	0.58022	0.650343	0.59899	0.634969	1.22749	1.66628	1.63098	1.35823	0.774125	1.45415	1.20228	0.696154	0.877589	1.39841	1.28296	1.36443	1.91499	1.3311	1.17437	0.578102	0.590677	0.598981	cytoplasm	GO:0006950 response to stress; GO:0006979 response to oxidative stress; GO:0050896 response to stimulus;	GO:0005622 intracellular; GO:0005623 cell; GO:0005737 cytoplasm; GO:0005829 cytosol; GO:0005886 plasma membrane; GO:0016020 membrane; GO:0044424 intracellular part; GO:0044444 cytoplasmic part; GO:0044464 cell part; GO:0071944 cell periphery;
Capana09g000691	218	0.443148	Down	0.00105653	K	P1_ARATH NADP-dependent alkenal double bond reductase P1 OS=Arabidopsis thaliana GN=P1 PE=1 SV=1	P1	1	2.19897e-06	112.8	EEHDLNAALK(1)R	2	0.367	20	1.61758	1.73355	1.78242	0.87855		0.718814	0.895735	0.654817	0.724374	0.734848		0.968341	0.974359	1.01827	0.978343	0.694747	0.560852			0.925056		0.951825	1.0102	0.945415	cytoplasm	GO:0006950 response to stress; GO:0006979 response to oxidative stress; GO:0050896 response to stimulus;	GO:0005622 intracellular; GO:0005623 cell; GO:0005737 cytoplasm; GO:0005829 cytosol; GO:0005886 plasma membrane; GO:0016020 membrane; GO:0044424 intracellular part; GO:0044444 cytoplasmic part; GO:0044464 cell part; GO:0071944 cell periphery;
Capana09g000715	188	0.477133	Down	0.0047611	K	RL8_SOLLC 60S ribosomal protein L8 OS=Solanum lycopersicum GN=RPL8 PE=2 SV=1	RPL8	1	0.00267086	117.39	AGNAYHK(1)YR	2	-6.1311	18	1.2372	1.16615			0.832234	0.973418		0.597363	0.549352	1.08992	0.920721	1.02174	1.39607	0.891935	1.21319	0.915014	0.872694		1.22838	0.991054		1.13766		1.21023	cytoplasm	GO:0002181 cytoplasmic translation; GO:0006412 translation; GO:0006518 peptide metabolic process; GO:0006807 nitrogen compound metabolic process; GO:0008152 metabolic process; GO:0009058 biosynthetic process; GO:0009059 macromolecule biosynthetic process; GO:0009987 cellular process; GO:0010467 gene expression; GO:0019538 protein metabolic process; GO:0034641 cellular nitrogen compound metabolic …	GO:0005622 intracellular; GO:0005623 cell; GO:0005737 cytoplasm; GO:0005829 cytosol; GO:0005840 ribosome; GO:0015934 large ribosomal subunit; GO:0022625 cytosolic large ribosomal subunit; GO:0022626 cytosolic ribosome; GO:0032991 macromolecular complex; GO:0043226 organelle; GO:0043228 non-membrane-bounded organelle; GO:0043229 intracellular organelle; GO:0043232 intracellular non-membrane-bounde…	GO:0003676 nucleic acid binding; GO:0003723 RNA binding; GO:0003735 structural constituent of ribosome; GO:0005198 structural molecule activity; GO:0005488 binding; GO:0097159 organic cyclic compound binding; GO:1901363 heterocyclic compound binding;	K02938	RP-L8e, RPL8; large subunit ribosomal protein L8e	cann03010 Ribosome	PF00181; PF03947	Ribosomal Proteins L2, RNA binding domain; Ribosomal Proteins L2, C-terminal domain
Capana09g000887	135	1.58548	Up	0.0074435	K	"TRXM4_ARATH Thioredoxin M4, chloroplastic OS=Arabidopsis thaliana GN=At3g15360 PE=1 SV=2"	At3g15360	1	4.0594e-162	245.18	FFK(1)VNTDESPGIATR	2	-3.9861	24	0.592028		0.560523	0.780992		0.689507	0.826303	0.925862	0.98886	0.055446	1.20914	1.72454		0.533007		0.87395		0.789725	1.10956	0.561203		1.37677	1.44436	1.64024	chloroplast				K03671	trxA; thioredoxin 1		PF00085	Thioredoxin
Capana09g000955	130	0.627401	Down	0.0028556	K	ADHX_ARATH Alcohol dehydrogenase class-3 OS=Arabidopsis thaliana GN=ADH2 PE=1 SV=2	ADH2	1	3.02665e-73	197.3	AATGVGVMMSDHK(1)SR	2	-6.6623	25	1.1819	1.13846	1.38442	1.36221	1.60312	1.33217	0.7875	0.718948	0.817932	0.825677	0.936	0.982885	1.28952	1.26091	1.22922	0.78635	0.708163	0.900724	0.943253	0.348365	0.759681	0.619385	0.907655	0.518913	cytoplasm				K00121	frmA, ADH5, adhC; S-(hydroxymethyl)glutathione dehydrogenase / alcohol dehydrogenase [EC:1.1.1.284 1.1.1.1]	cann00010 Glycolysis / Gluconeogenesis; cann00071 Fatty acid degradation; cann00350 Tyrosine metabolism; cann01100 Metabolic pathways; cann01110 Biosynthesis of secondary metabolites; cann01200 Carbon metabolism	PF08240	Alcohol dehydrogenase GroES-like domain
Capana09g001643	256	2.0423	Up	0.00190268	K	"F16P1_ARATH Fructose-1,6-bisphosphatase, chloroplastic OS=Arabidopsis thaliana GN=FBP PE=1 SV=2"	FBP	1	7.71841e-16	168.78	YIDDLKDPGPSGK(1)PYSAR	3	-7.0789	36	0.514944	0.589427	0.703941	0.928239	1.34039	0.803157	1.23314	1.31609	1.14388		0.823477	1.09422	0.994357	0.791383	1.10294		0.811681	0.725806	1.03049	1.12919	1.19468	1.12254	1.39522	1.27995	nucleus	GO:0005975 carbohydrate metabolic process; GO:0005984 disaccharide metabolic process; GO:0005985 sucrose metabolic process; GO:0005986 sucrose biosynthetic process; GO:0005996 monosaccharide metabolic process; GO:0006000 fructose metabolic process; GO:0006002 fructose 6-phosphate metabolic process; GO:0006006 glucose metabolic process; GO:0006094 gluconeogenesis; GO:0006793 phosphorus metabolic p…	GO:0005622 intracellular; GO:0005623 cell; GO:0005737 cytoplasm; GO:0005829 cytosol; GO:0009507 chloroplast; GO:0009532 plastid stroma; GO:0009536 plastid; GO:0009570 chloroplast stroma; GO:0043226 organelle; GO:0043227 membrane-bounded organelle; GO:0043229 intracellular organelle; GO:0043231 intracellular membrane-bounded organelle; GO:0044422 organelle part; GO:0044424 intracellular part; GO:0…	GO:0003824 catalytic activity; GO:0016787 hydrolase activity; GO:0016788 hydrolase activity, acting on ester bonds; GO:0016791 phosphatase activity; GO:0019203 carbohydrate phosphatase activity; GO:0042132 fructose 1,6-bisphosphate 1-phosphatase activity; GO:0042578 phosphoric ester hydrolase activity; GO:0050308 sugar-phosphatase activity;	K03841	FBP, fbp; fructose-1,6-bisphosphatase I [EC:3.1.3.11]	cann00010 Glycolysis / Gluconeogenesis; cann00030 Pentose phosphate pathway; cann00051 Fructose and mannose metabolism; cann00710 Carbon fixation in photosynthetic organisms; cann01100 Metabolic pathways; cann01110 Biosynthesis of secondary metabolites; cann01200 Carbon metabolism	PF00316	Fructose-1-6-bisphosphatase
Capana09g001701	52	0.52348	Down	0.0042386	K	AKRC9_ARATH Aldo-keto reductase family 4 member C9 OS=Arabidopsis thaliana GN=AKR4C9 PE=1 SV=1	AKR4C9	1	4.94092e-13	160.98	HIDCAHVYK(1)NEK	2	0.2186	56	1.49908	1.50643	1.79106	1.35058	1.33566	1.22464	0.871766		0.802174	0.558074	0.862726	0.82364		0.916667	1.04272	0.380711	0.763617	1.12114	0.673224	1.16965	0.741071	0.819258	0.729064	0.79789	cytoplasm				K00002	AKR1A1, adh; alcohol dehydrogenase (NADP+) [EC:1.1.1.2]	cann00010 Glycolysis / Gluconeogenesis; cann00040 Pentose and glucuronate interconversions; cann00561 Glycerolipid metabolism; cann01100 Metabolic pathways; cann01110 Biosynthesis of secondary metabolites	PF00248	Aldo/keto reductase family
Capana09g001761	193	0.332039	Down	0.023478	K	GSTX1_SOLTU Probable glutathione S-transferase OS=Solanum tuberosum GN=PRP1 PE=2 SV=1	PRP1	1	1.22824e-06	148.76	DEYCSENK(1)EYLPPR	2	5.7916	20	1.54348	2.05627			1.21968	1.32938	0.542092	0.653165		0.441731		0.952542	0.937251	1.52759	0.919574	1.38852	1.12599	0.942529	0.816842		1.56804	0.411361	0.306748	0.689457	chloroplast	GO:0001101 response to acid chemical; GO:0006518 peptide metabolic process; GO:0006575 cellular modified amino acid metabolic process; GO:0006749 glutathione metabolic process; GO:0006790 sulfur compound metabolic process; GO:0006807 nitrogen compound metabolic process; GO:0006950 response to stress; GO:0008152 metabolic process; GO:0009056 catabolic process; GO:0009266 response to temperature st…	GO:0005622 intracellular; GO:0005623 cell; GO:0005737 cytoplasm; GO:0044424 intracellular part; GO:0044464 cell part;	GO:0003824 catalytic activity; GO:0004364 glutathione transferase activity; GO:0016740 transferase activity; GO:0016765 transferase activity, transferring alkyl or aryl (other than methyl) groups;	K00799	GST, gst; glutathione S-transferase [EC:2.5.1.18]	cann00480 Glutathione metabolism; cann01100 Metabolic pathways	PF02798; PF00043	Glutathione S-transferase, N-terminal domain; Glutathione S-transferase, C-terminal domain
Capana09g002021	84	1.63068	Up	0.00024047	K	"DAPF_ARATH Diaminopimelate epimerase, chloroplastic OS=Arabidopsis thaliana GN=DAPF PE=1 SV=1"	DAPF	1	4.22974e-28	175.69	ESGFVHFVK(1)YHGLGNDFILVDNR	3	-2.6025	15	1.2264	1.1332	1.15343	0.692913	0.587065	0.85189	1.84876	2.03039	1.84946	0.681774	0.7862		0.671875								0.543779	0.083395			chloroplast				K01778	dapF; diaminopimelate epimerase [EC:5.1.1.7]	cann00300 Lysine biosynthesis; cann01100 Metabolic pathways; cann01110 Biosynthesis of secondary metabolites; cann01230 Biosynthesis of amino acids	PF01678	Diaminopimelate epimerase
Capana09g002303	136	0.617475	Down	0.00175892	K	"FK164_ARATH Peptidyl-prolyl cis-trans isomerase FKBP16-4, chloroplastic OS=Arabidopsis thaliana GN=FKBP16-4 PE=1 SV=1"	FKBP16-4	1	0.000129222	109.36	VAIHYVAK(1)WR	2	-6.05	23	1.51503	1.39161	1.24024	1.43539	1.21762	1.18668	0.867797	0.806678	0.886121	0.731123	0.887097	0.902572	1.06773	0.926306	1.03475	1.21557	0.801205	0.922811	0.531111	1.08791	0.700658	0.901559	1.0592		chloroplast		GO:0005622 intracellular; GO:0005623 cell; GO:0005737 cytoplasm; GO:0009507 chloroplast; GO:0009534 chloroplast thylakoid; GO:0009535 chloroplast thylakoid membrane; GO:0009536 plastid; GO:0009579 thylakoid; GO:0016020 membrane; GO:0031976 plastid thylakoid; GO:0031984 organelle subcompartment; GO:0034357 photosynthetic membrane; GO:0042651 thylakoid membrane; GO:0043226 organelle; GO:0043227 mem…					PF00254	FKBP-type peptidyl-prolyl cis-trans isomerase
Capana09g002348	198	0.651432	Down	0.00051638	K	ENO_SOLLC Enolase OS=Solanum lycopersicum GN=PGH1 PE=2 SV=1	PGH1	1	7.59369e-07	101.64	MGCEVYHHLK(1)AVIK	2	-2.2816	39	1.21941	1.29368	1.36793	1.56129	1.5064	1.58667	0.885512	0.815261	0.827451		0.738899	0.688638	0.981857	1.12474	1.03239	0.890121	0.965625	1.075	0.918919	1.10704	0.993415	0.553877	0.628803	0.620858	cytoplasm	GO:0001101 response to acid chemical; GO:0006950 response to stress; GO:0006970 response to osmotic stress; GO:0009266 response to temperature stimulus; GO:0009314 response to radiation; GO:0009409 response to cold; GO:0009416 response to light stimulus; GO:0009628 response to abiotic stimulus; GO:0009651 response to salt stress; GO:0009719 response to endogenous stimulus; GO:0009725 response to …	GO:0005576 extracellular region; GO:0005622 intracellular; GO:0005623 cell; GO:0005634 nucleus; GO:0005737 cytoplasm; GO:0005739 mitochondrion; GO:0005740 mitochondrial envelope; GO:0005829 cytosol; GO:0005886 plasma membrane; GO:0005911 cell-cell junction; GO:0009506 plasmodesma; GO:0009507 chloroplast; GO:0009536 plastid; GO:0016020 membrane; GO:0030054 cell junction; GO:0031967 organelle envel…	GO:0003676 nucleic acid binding; GO:0003677 DNA binding; GO:0003824 catalytic activity; GO:0004634 phosphopyruvate hydratase activity; GO:0005488 binding; GO:0005507 copper ion binding; GO:0016829 lyase activity; GO:0016835 carbon-oxygen lyase activity; GO:0016836 hydro-lyase activity; GO:0043167 ion binding; GO:0043169 cation binding; GO:0046872 metal ion binding; GO:0046914 transition metal ion…	K01689	ENO, eno; enolase [EC:4.2.1.11]	cann00010 Glycolysis / Gluconeogenesis; cann01100 Metabolic pathways; cann01110 Biosynthesis of secondary metabolites; cann01200 Carbon metabolism; cann01230 Biosynthesis of amino acids; cann03018 RNA degradation	PF03952; PF00113	Enolase, N-terminal domain; Enolase, C-terminal TIM barrel domain
Capana09g002348	389	1.6339	Up	0.034856	K	ENO_SOLLC Enolase OS=Solanum lycopersicum GN=PGH1 PE=2 SV=1	PGH1	1	0.00227808	150.88	LAK(1)YNQLLR	2	2.9413	25	0.921132	0.642105	0.680294	1.05376	1.04797	1.24	0.985816	1.43675	1.24314	1.0897	0.609236	1.12142	1.6841	0.865751	0.938349	1.25202	1.10729	1.13854	1.18267	0.721311	0.670743	0.800604	0.814402	0.82846	cytoplasm	GO:0001101 response to acid chemical; GO:0006950 response to stress; GO:0006970 response to osmotic stress; GO:0009266 response to temperature stimulus; GO:0009314 response to radiation; GO:0009409 response to cold; GO:0009416 response to light stimulus; GO:0009628 response to abiotic stimulus; GO:0009651 response to salt stress; GO:0009719 response to endogenous stimulus; GO:0009725 response to …	GO:0005576 extracellular region; GO:0005622 intracellular; GO:0005623 cell; GO:0005634 nucleus; GO:0005737 cytoplasm; GO:0005739 mitochondrion; GO:0005740 mitochondrial envelope; GO:0005829 cytosol; GO:0005886 plasma membrane; GO:0005911 cell-cell junction; GO:0009506 plasmodesma; GO:0009507 chloroplast; GO:0009536 plastid; GO:0016020 membrane; GO:0030054 cell junction; GO:0031967 organelle envel…	GO:0003676 nucleic acid binding; GO:0003677 DNA binding; GO:0003824 catalytic activity; GO:0004634 phosphopyruvate hydratase activity; GO:0005488 binding; GO:0005507 copper ion binding; GO:0016829 lyase activity; GO:0016835 carbon-oxygen lyase activity; GO:0016836 hydro-lyase activity; GO:0043167 ion binding; GO:0043169 cation binding; GO:0046872 metal ion binding; GO:0046914 transition metal ion…	K01689	ENO, eno; enolase [EC:4.2.1.11]	cann00010 Glycolysis / Gluconeogenesis; cann01100 Metabolic pathways; cann01110 Biosynthesis of secondary metabolites; cann01200 Carbon metabolism; cann01230 Biosynthesis of amino acids; cann03018 RNA degradation	PF03952; PF00113	Enolase, N-terminal domain; Enolase, C-terminal TIM barrel domain
Capana10g000134	151	2.26123	Up	0.034083	K	GOX_SPIOL Peroxisomal (S)-2-hydroxy-acid oxidase OS=Spinacia oleracea PE=1 SV=1	---	1	1.46826e-07	141.44	AGFK(1)AIALTVDTPR	2	-5.516	34	0.819374	0.374765	0.367908	0.5625	0.449739	0.361152	1.28122	0.974948	1.27598	0.945669	0.62616	0.619917	1.12567	0.69546	0.38964	2.18582	1.79231	1.55476	2.08929	1.79705	1.54007	1.51779	1.54071	1.46819	cytoplasm	GO:0006950 response to stress; GO:0006952 defense response; GO:0008152 metabolic process; GO:0009058 biosynthetic process; GO:0009605 response to external stimulus; GO:0009607 response to biotic stimulus; GO:0009617 response to bacterium; GO:0009719 response to endogenous stimulus; GO:0009725 response to hormone; GO:0009735 response to cytokinin; GO:0009987 cellular process; GO:0010033 response t…	GO:0005576 extracellular region; GO:0005622 intracellular; GO:0005623 cell; GO:0005634 nucleus; GO:0005737 cytoplasm; GO:0005777 peroxisome; GO:0005829 cytosol; GO:0005840 ribosome; GO:0005911 cell-cell junction; GO:0009506 plasmodesma; GO:0009507 chloroplast; GO:0009532 plastid stroma; GO:0009536 plastid; GO:0009570 chloroplast stroma; GO:0016020 membrane; GO:0022626 cytosolic ribosome; GO:00300…	GO:0003824 catalytic activity; GO:0003973 (S)-2-hydroxy-acid oxidase activity; GO:0008891 glycolate oxidase activity; GO:0016491 oxidoreductase activity; GO:0016614 oxidoreductase activity, acting on CH-OH group of donors; GO:0016899 oxidoreductase activity, acting on the CH-OH group of donors, oxygen as acceptor;	K11517	HAO; (S)-2-hydroxy-acid oxidase [EC:1.1.3.15]	cann00630 Glyoxylate and dicarboxylate metabolism; cann01100 Metabolic pathways; cann01110 Biosynthesis of secondary metabolites; cann01200 Carbon metabolism; cann04146 Peroxisome	PF01070	FMN-dependent dehydrogenase
Capana10g000740	267	0.62268	Down	0.00040307	K	"HEM6_TOBAC Coproporphyrinogen-III oxidase, chloroplastic OS=Nicotiana tabacum GN=CPX PE=2 SV=1"	CPX	1	4.89034e-13	179.95	WCDDYFYIK(1)HR	3	-8.4175	62	1.53307	1.4532	1.33459	1.41597	1.32498	1.33884	0.87963	0.925664	0.885217	0.861401	0.905286	0.908209	1.17799	1.17351	1.09284	0.824742	0.984195	0.857741	0.976056	0.959327	0.824176	0.526189	0.534555	0.5775	cytoplasm	GO:0009719 response to endogenous stimulus; GO:0009725 response to hormone; GO:0009735 response to cytokinin; GO:0010033 response to organic substance; GO:0042221 response to chemical; GO:0050896 response to stimulus;	GO:0005576 extracellular region; GO:0005622 intracellular; GO:0005623 cell; GO:0005737 cytoplasm; GO:0009507 chloroplast; GO:0009532 plastid stroma; GO:0009536 plastid; GO:0009570 chloroplast stroma; GO:0043226 organelle; GO:0043227 membrane-bounded organelle; GO:0043229 intracellular organelle; GO:0043231 intracellular membrane-bounded organelle; GO:0044422 organelle part; GO:0044424 intracellul…	GO:0005488 binding; GO:0005515 protein binding; GO:0042802 identical protein binding; GO:0042803 protein homodimerization activity; GO:0046983 protein dimerization activity;	K00228	CPOX, hemF; coproporphyrinogen III oxidase [EC:1.3.3.3]	cann00860 Porphyrin and chlorophyll metabolism; cann01100 Metabolic pathways; cann01110 Biosynthesis of secondary metabolites
Capana10g000740	258	0.627519	Down	0.0057831	K	"HEM6_TOBAC Coproporphyrinogen-III oxidase, chloroplastic OS=Nicotiana tabacum GN=CPX PE=2 SV=1"	CPX	1	0.00209622	81.099	K(1)WCDDYFYIK	2	-5.5785	17	1.2525		1.06503	1.38719	1.25246	1.27089	0.72138	0.753982	0.706087		0.759912	0.805224	1.1481			0.868925				0.814867	0.796703	0.853344	0.847627	0.8625	cytoplasm	GO:0009719 response to endogenous stimulus; GO:0009725 response to hormone; GO:0009735 response to cytokinin; GO:0010033 response to organic substance; GO:0042221 response to chemical; GO:0050896 response to stimulus;	GO:0005576 extracellular region; GO:0005622 intracellular; GO:0005623 cell; GO:0005737 cytoplasm; GO:0009507 chloroplast; GO:0009532 plastid stroma; GO:0009536 plastid; GO:0009570 chloroplast stroma; GO:0043226 organelle; GO:0043227 membrane-bounded organelle; GO:0043229 intracellular organelle; GO:0043231 intracellular membrane-bounded organelle; GO:0044422 organelle part; GO:0044424 intracellul…	GO:0005488 binding; GO:0005515 protein binding; GO:0042802 identical protein binding; GO:0042803 protein homodimerization activity; GO:0046983 protein dimerization activity;	K00228	CPOX, hemF; coproporphyrinogen III oxidase [EC:1.3.3.3]	cann00860 Porphyrin and chlorophyll metabolism; cann01100 Metabolic pathways; cann01110 Biosynthesis of secondary metabolites
Capana10g001075	147	0.563509	Down	0.00188307	K	GRP2B_ARATH Glycine-rich protein 2b OS=Arabidopsis thaliana GN=GRP2B PE=2 SV=1	GRP2B	1	7.95456e-35	151.55	YGGGGGGGGSGCYK(1)CGEEGHFAR	3	-4.6286	23	1.50314	1.63968	1.32295	1.4654	1.32976	1.3946	0.883792	0.761019	0.87169	1.0598	1.03301	0.922835	1.29158	0.940783	1.77068	0.912517		0.838037	0.84396	0.458803	0.83981	0.31003	0.683051	0.607113	mitochondria							PF00313; PF00098	'Cold-shock' DNA-binding domain; Zinc knuckle
Capana10g001668	15	1.68437	Up	0.0002208	K	EF1D_PIMBR Elongation factor 1-delta OS=Pimpinella brachycarpa PE=2 SV=3	---	1	3.88663e-24	140.57	AVAFNNVNSDSGLK(1)K	2	-4.0665	37	0.700456	0.673401	0.664829	1.00243	0.749428	0.950646	1.12406	1.16522		1.01296	0.785444	1.1467	1.0807		0.729437	1.35784	1.06235	1.24594	1.0859	0.78361	0.754402	1.18204	1.40237	1.0687	cytoplasm		GO:0005622 intracellular; GO:0005623 cell; GO:0005737 cytoplasm; GO:0005829 cytosol; GO:0044424 intracellular part; GO:0044444 cytoplasmic part; GO:0044464 cell part;		K03232	EEF1B; elongation factor 1-beta		PF00736	EF-1 guanine nucleotide exchange domain
Capana10g001856	364	0.651889	Down	4.0433e-05	K	METK2_TOBAC S-adenosylmethionine synthase 2 OS=Nicotiana tabacum GN=SAMS2 PE=2 SV=1	SAMS2	1	1.0119e-33	187.1	YQK(1)TAAYGHFGR	2	2.3618	56	1.14337	1.2117	1.13369	1.21305	1.26457	1.17529	0.760814	0.748379	0.765092	0.894482	0.959163	0.886432	1.19608	1.23845	1.22246	0.863057	0.8386	0.89177	0.932297	0.978676	0.998907	0.843411	0.853175	0.847626	cytoskeleton		GO:0005622 intracellular; GO:0005623 cell; GO:0005737 cytoplasm; GO:0005829 cytosol; GO:0044424 intracellular part; GO:0044444 cytoplasmic part; GO:0044464 cell part;	GO:0003824 catalytic activity; GO:0004478 methionine adenosyltransferase activity; GO:0016740 transferase activity; GO:0016765 transferase activity, transferring alkyl or aryl (other than methyl) groups;	K00789	metK; S-adenosylmethionine synthetase [EC:2.5.1.6]	cann00270 Cysteine and methionine metabolism; cann01100 Metabolic pathways; cann01110 Biosynthesis of secondary metabolites; cann01230 Biosynthesis of amino acids	PF00438; PF02772; PF02773	S-adenosylmethionine synthetase, N-terminal domain; S-adenosylmethionine synthetase, central domain; S-adenosylmethionine synthetase, C-terminal domain
Capana10g001865	217	0.630118	Down	0.037141	K	"PSBP_SOLLC Oxygen-evolving enhancer protein 2, chloroplastic OS=Solanum lycopersicum GN=PSBP PE=2 SV=1"	PSBP	1	0	501.38	TADGDEGGK(1)HQLITATVNDGK	2	4.3235	56	1.88069	1.40476	2.07302	1.60656	1.19088	1.08378	0.931034	1.25043	1.19501	0.802416	0.77305	0.767564	1.84477	1.92485	1.67125	1.06849	0.455163	1.14132	0.983501	1.08478	1.05823	0.819788	0.051811	0.748238	chloroplast		GO:0005622 intracellular; GO:0005623 cell; GO:0005737 cytoplasm; GO:0009507 chloroplast; GO:0009534 chloroplast thylakoid; GO:0009535 chloroplast thylakoid membrane; GO:0009536 plastid; GO:0009579 thylakoid; GO:0016020 membrane; GO:0031976 plastid thylakoid; GO:0031984 organelle subcompartment; GO:0034357 photosynthetic membrane; GO:0042651 thylakoid membrane; GO:0043226 organelle; GO:0043227 mem…		K02717	psbP; photosystem II oxygen-evolving enhancer protein 2	cann00195 Photosynthesis	PF01789	PsbP
Capana10g001955	354	0.503167	Down	0.00065866	K	ALF_ORYSJ Fructose-bisphosphate aldolase cytoplasmic isozyme OS=Oryza sativa subsp. japonica GN=FBA PE=1 SV=2	FBA	1	1.76034e-86	266.35	YAGSSHLSEGASESLHVK(1)DYK	3	-5.9691	26	1.32741	1.2655	1.55644	1.26531	1.39123	1.47297	0.742179	0.683761	0.661878	0.815446	0.790448	0.808206	1.50346	1.44068	1.54198	1.00651	0.983759	1.03873	0.812709	0.877817	0.842529	0.5	0.434916	0.514965	cytoplasm				K01623	ALDO; fructose-bisphosphate aldolase, class I [EC:4.1.2.13]	cann00010 Glycolysis / Gluconeogenesis; cann00030 Pentose phosphate pathway; cann00051 Fructose and mannose metabolism; cann00710 Carbon fixation in photosynthetic organisms; cann01100 Metabolic pathways; cann01110 Biosynthesis of secondary metabolites; cann01200 Carbon metabolism; cann01230 Biosynthesis of amino acids	PF00274	Fructose-bisphosphate aldolase class-I
Capana10g001955	336	0.636179	Down	0.0018192	K	ALF_ORYSJ Fructose-bisphosphate aldolase cytoplasmic isozyme OS=Oryza sativa subsp. japonica GN=FBA PE=1 SV=2	FBA	1	7.3322e-100	202.51	ANSEATLGK(1)YAGSSHLSEGASESLHVK	3	0.39761	25	1.35454	1.42248	1.17882	1.48625	1.68246	1.54234	0.878101	0.810897	0.827624	0.764293	0.611111	0.759542	1.68014	1.62034	1.52672	0.876356	0.801624	0.721831	0.591973	0.888493	0.794253	0.48532	0.464012	0.42287	cytoplasm				K01623	ALDO; fructose-bisphosphate aldolase, class I [EC:4.1.2.13]	cann00010 Glycolysis / Gluconeogenesis; cann00030 Pentose phosphate pathway; cann00051 Fructose and mannose metabolism; cann00710 Carbon fixation in photosynthetic organisms; cann01100 Metabolic pathways; cann01110 Biosynthesis of secondary metabolites; cann01200 Carbon metabolism; cann01230 Biosynthesis of amino acids	PF00274	Fructose-bisphosphate aldolase class-I
Capana10g002009	95	0.526524	Down	0.034716	K	RS142_ARATH 40S ribosomal protein S14-2 OS=Arabidopsis thaliana GN=RPS14B PE=1 SV=1	RPS14B	1	1.74711e-21	178.95	ELGINALHIK(1)LR	2	2.8692	31	1.42531	1.13716	0.941489	1.36483	1.23097	1.05096	0.617978	0.618247	0.608696					1.12581		1.08996	1.08403	1.25275	1.07197	1.00248	1.01918	0.77707	0.738589		cytoplasm	GO:0000028 ribosomal small subunit assembly; GO:0000462 maturation of SSU-rRNA from tricistronic rRNA transcript (SSU-rRNA, 5.8S rRNA, LSU-rRNA); GO:0006139 nucleobase-containing compound metabolic process; GO:0006364 rRNA processing; GO:0006396 RNA processing; GO:0006412 translation; GO:0006518 peptide metabolic process; GO:0006725 cellular aromatic compound metabolic process; GO:0006807 nitroge…	GO:0005622 intracellular; GO:0005623 cell; GO:0005634 nucleus; GO:0005730 nucleolus; GO:0005737 cytoplasm; GO:0005829 cytosol; GO:0005840 ribosome; GO:0005844 polysome; GO:0015935 small ribosomal subunit; GO:0022626 cytosolic ribosome; GO:0022627 cytosolic small ribosomal subunit; GO:0031974 membrane-enclosed lumen; GO:0031981 nuclear lumen; GO:0032991 macromolecular complex; GO:0042788 polysomal…	GO:0003676 nucleic acid binding; GO:0003723 RNA binding; GO:0003729 mRNA binding; GO:0003735 structural constituent of ribosome; GO:0005198 structural molecule activity; GO:0005488 binding; GO:0019843 rRNA binding; GO:0048027 mRNA 5'-UTR binding; GO:0070181 small ribosomal subunit rRNA binding; GO:0097159 organic cyclic compound binding; GO:1901363 heterocyclic compound binding;	K02955	RP-S14e, RPS14; small subunit ribosomal protein S14e	cann03010 Ribosome
Capana10g002020	260	1.56692	Up	0.00169626	K	CPR49_ARATH GDSL esterase/lipase CPRD49 OS=Arabidopsis thaliana GN=CPRD49 PE=2 SV=1	CPRD49	1	9.3738e-09	126.63	ETEDETIGITDSNSQELK(1)PQ	2	5.8457	8	0.874601	0.856818	0.891374		0.930373	1.07935	1.29881	1.44099		0.682731															cytoplasm							PF13472	GDSL-like Lipase/Acylhydrolase family
Capana10g002167	145	0.615257	Down	0.00088396	K	MIRA_RICDU Miraculin OS=Richadella dulcifica PE=1 SV=3	---	1	0.0103907	72.355	YK(1)YVVAR	2	-2.492	24	1.66119	1.68201	1.42803	1.36817	1.88057	1.97286	0.970631	0.959877	1.00503	0.971765	0.772358	0.908784	1.53219	1.43196	1.36583	0.948317	0.716336	0.685528	0.515042	0.411765	0.654938	0.533879	0.632823	0.688771	extracellular							PF00197	Trypsin and protease inhibitor
Capana10g002214	442	0.642262	Down	0.0094849	K	TRXB3_ARATH NADPH-dependent thioredoxin reductase 3 OS=Arabidopsis thaliana GN=NTRC PE=1 SV=2	NTRC	1	0.0028381	81.32	HK(1)GQYALR	2	-2.1824	13	1.19915		1.27622	1.18248	1.10208	1.04242	0.87391	0.722178	0.788668					1.07764			0.78023		0.774884	0.781308	0.786434				chloroplast				K00384	trxB, TRR; thioredoxin reductase (NADPH) [EC:1.8.1.9]	cann00450 Selenocompound metabolism	PF07992; PF00085	Pyridine nucleotide-disulphide oxidoreductase; Thioredoxin
Capana10g002385	115	0.616385	Down	0.008321	K	C3H14_ORYSJ Zinc finger CCCH domain-containing protein 14 OS=Oryza sativa subsp. japonica GN=Os02g0194200 PE=2 SV=1	Os02g0194200	1	2.05314e-05	107.6	NAPAPPMANGNAPAVK(1)TK	2	-3.2527	22	1.08016	1.02359	1.21781	0.895833	0.837058	1.02812	0.645882	0.719027		0.7954	0.94	1.11438	1.25076	1.28074	1.18322	1.14421	1.01138	1.19071	1.06622	1.31996	1.21165	0.670073		0.678098	extracellular	GO:0006355 regulation of transcription, DNA-templated; GO:0009889 regulation of biosynthetic process; GO:0010468 regulation of gene expression; GO:0010556 regulation of macromolecule biosynthetic process; GO:0019219 regulation of nucleobase-containing compound metabolic process; GO:0019222 regulation of metabolic process; GO:0031323 regulation of cellular metabolic process; GO:0031326 regulation …	GO:0005622 intracellular; GO:0005623 cell; GO:0005634 nucleus; GO:0043226 organelle; GO:0043227 membrane-bounded organelle; GO:0043229 intracellular organelle; GO:0043231 intracellular membrane-bounded organelle; GO:0044424 intracellular part; GO:0044464 cell part;	GO:0003676 nucleic acid binding; GO:0003700 transcription factor activity, sequence-specific DNA binding; GO:0003723 RNA binding; GO:0005488 binding; GO:0097159 organic cyclic compound binding; GO:1901363 heterocyclic compound binding;				PF00013	KH domain
Capana10g002385	121	0.638138	Down	0.0030556	K	C3H14_ORYSJ Zinc finger CCCH domain-containing protein 14 OS=Oryza sativa subsp. japonica GN=Os02g0194200 PE=2 SV=1	Os02g0194200	1	5.6349e-34	195.8	LCNK(1)FNTAEGCK	2	0.27511	43	1.32682	1.2931	1.50215	1.25379	1.42272	1.33919	0.855294	0.966814	0.808343	0.897094	0.872222	0.944507	1.29137	0.46209	1.25844	0.922201	0.885199	1.35257	0.943709	0.704989	0.826428	0.556204	0.676667		extracellular	GO:0006355 regulation of transcription, DNA-templated; GO:0009889 regulation of biosynthetic process; GO:0010468 regulation of gene expression; GO:0010556 regulation of macromolecule biosynthetic process; GO:0019219 regulation of nucleobase-containing compound metabolic process; GO:0019222 regulation of metabolic process; GO:0031323 regulation of cellular metabolic process; GO:0031326 regulation …	GO:0005622 intracellular; GO:0005623 cell; GO:0005634 nucleus; GO:0043226 organelle; GO:0043227 membrane-bounded organelle; GO:0043229 intracellular organelle; GO:0043231 intracellular membrane-bounded organelle; GO:0044424 intracellular part; GO:0044464 cell part;	GO:0003676 nucleic acid binding; GO:0003700 transcription factor activity, sequence-specific DNA binding; GO:0003723 RNA binding; GO:0005488 binding; GO:0097159 organic cyclic compound binding; GO:1901363 heterocyclic compound binding;				PF00013	KH domain
Capana11g000039	125	0.541492	Down	0.00089535	K	"RUBA_PEA RuBisCO large subunit-binding protein subunit alpha, chloroplastic OS=Pisum sativum PE=1 SV=2"	---	1	0	241.99	EVASK(1)TNDSAGDGTTTASVLAR	2	-1.5144	24	1.22732	1.14391	1.23148	1.05343	1.12935	0.894793	0.737365	0.600753	0.612722	0.758361	0.927169	0.965203	1.25054	1.5397	1.46086	0.777904	1.02841	0.990142	0.922719	0.881711	0.819615	1.04681	1.20502	1.13273	chloroplast	GO:0000003 reproduction; GO:0003006 developmental process involved in reproduction; GO:0006457 protein folding; GO:0006458 'de novo' protein folding; GO:0006996 organelle organization; GO:0007005 mitochondrion organization; GO:0007275 multicellular organism development; GO:0009657 plastid organization; GO:0009658 chloroplast organization; GO:0009790 embryo development; GO:0009791 post-embryonic d…	GO:0005576 extracellular region; GO:0005622 intracellular; GO:0005623 cell; GO:0005737 cytoplasm; GO:0005739 mitochondrion; GO:0005829 cytosol; GO:0005840 ribosome; GO:0009507 chloroplast; GO:0009526 plastid envelope; GO:0009532 plastid stroma; GO:0009536 plastid; GO:0009570 chloroplast stroma; GO:0009579 thylakoid; GO:0009941 chloroplast envelope; GO:0016020 membrane; GO:0022626 cytosolic riboso…	GO:0005488 binding; GO:0005515 protein binding; GO:0044183 protein binding involved in protein folding; GO:0051082 unfolded protein binding;
Capana11g000087	81	0.623124	Down	0.047781	K	ISPG_PARUW 4-hydroxy-3-methylbut-2-en-1-yl diphosphate synthase OS=Protochlamydia amoebophila (strain UWE25) GN=ispG PE=3 SV=1	ispG	1	1.14239e-27	208.6	YCESIHK(1)TVR	2	-7.0737	25	1.32387	1.35484	1.36902	1.5	1.37111	1.03603	0.936461	0.667976	0.917808	0.614699		0.755011	1.32465	1.11961	1.17944	0.949038	0.947469	0.972846	0.844828	0.882241	0.730097	0.505689	0.664132	0.471191	chloroplast	GO:0001101 response to acid chemical; GO:0002376 immune system process; GO:0006081 cellular aldehyde metabolic process; GO:0006082 organic acid metabolic process; GO:0006090 pyruvate metabolic process; GO:0006629 lipid metabolic process; GO:0006644 phospholipid metabolic process; GO:0006720 isoprenoid metabolic process; GO:0006793 phosphorus metabolic process; GO:0006796 phosphate-containing comp…	GO:0005622 intracellular; GO:0005623 cell; GO:0005737 cytoplasm; GO:0009507 chloroplast; GO:0009526 plastid envelope; GO:0009532 plastid stroma; GO:0009536 plastid; GO:0009570 chloroplast stroma; GO:0009941 chloroplast envelope; GO:0031967 organelle envelope; GO:0031975 envelope; GO:0043226 organelle; GO:0043227 membrane-bounded organelle; GO:0043229 intracellular organelle; GO:0043231 intracellu…	GO:0003824 catalytic activity; GO:0005488 binding; GO:0016491 oxidoreductase activity; GO:0016725 oxidoreductase activity, acting on CH or CH2 groups; GO:0046429 4-hydroxy-3-methylbut-2-en-1-yl diphosphate synthase activity; GO:0048037 cofactor binding; GO:0051536 iron-sulfur cluster binding; GO:0051539 4 iron, 4 sulfur cluster binding; GO:0051540 metal cluster binding; GO:0052592 oxidoreductase …	K03526	gcpE, ispG; (E)-4-hydroxy-3-methylbut-2-enyl-diphosphate synthase [EC:1.17.7.1 1.17.7.3]	cann00900 Terpenoid backbone biosynthesis; cann01100 Metabolic pathways; cann01110 Biosynthesis of secondary metabolites
Capana11g000087	569	0.614628	Down	9.2111e-07	K	ISPG_PARUW 4-hydroxy-3-methylbut-2-en-1-yl diphosphate synthase OS=Protochlamydia amoebophila (strain UWE25) GN=ispG PE=3 SV=1	ispG	1	1.88656e-73	217.24	NTK(1)TEYVSCPSCGR	2	-0.24724	35	1.37769	1.36717	1.33939	1.44685	1.45336	1.35054	0.844575	0.841847	0.823875	0.874165	0.91314	0.928731	1.21181	1.27353	1.27439	0.844231	0.917861	0.898876	0.791188	0.795821	0.586408	0.40708	0.490494	0.462228	chloroplast	GO:0001101 response to acid chemical; GO:0002376 immune system process; GO:0006081 cellular aldehyde metabolic process; GO:0006082 organic acid metabolic process; GO:0006090 pyruvate metabolic process; GO:0006629 lipid metabolic process; GO:0006644 phospholipid metabolic process; GO:0006720 isoprenoid metabolic process; GO:0006793 phosphorus metabolic process; GO:0006796 phosphate-containing comp…	GO:0005622 intracellular; GO:0005623 cell; GO:0005737 cytoplasm; GO:0009507 chloroplast; GO:0009526 plastid envelope; GO:0009532 plastid stroma; GO:0009536 plastid; GO:0009570 chloroplast stroma; GO:0009941 chloroplast envelope; GO:0031967 organelle envelope; GO:0031975 envelope; GO:0043226 organelle; GO:0043227 membrane-bounded organelle; GO:0043229 intracellular organelle; GO:0043231 intracellu…	GO:0003824 catalytic activity; GO:0005488 binding; GO:0016491 oxidoreductase activity; GO:0016725 oxidoreductase activity, acting on CH or CH2 groups; GO:0046429 4-hydroxy-3-methylbut-2-en-1-yl diphosphate synthase activity; GO:0048037 cofactor binding; GO:0051536 iron-sulfur cluster binding; GO:0051539 4 iron, 4 sulfur cluster binding; GO:0051540 metal cluster binding; GO:0052592 oxidoreductase …	K03526	gcpE, ispG; (E)-4-hydroxy-3-methylbut-2-enyl-diphosphate synthase [EC:1.17.7.1 1.17.7.3]	cann00900 Terpenoid backbone biosynthesis; cann01100 Metabolic pathways; cann01110 Biosynthesis of secondary metabolites
Capana11g000124	279	0.629343	Down	0.005578	K	EF1G2_ORYSJ Elongation factor 1-gamma 2 OS=Oryza sativa subsp. japonica GN=Os02g0220500 PE=2 SV=2	Os02g0220500	1	7.12934e-19	158.61	LYSNTK(1)TNFR	2	4.1729	21	1.38191	1.36467		1.21178	1.50499	1.56148	0.834728		0.893814			0.962264						0.649538		0.426943	0.603243	0.56544		0.679245	chloroplast	GO:0006412 translation; GO:0006414 translational elongation; GO:0006518 peptide metabolic process; GO:0006575 cellular modified amino acid metabolic process; GO:0006749 glutathione metabolic process; GO:0006790 sulfur compound metabolic process; GO:0006807 nitrogen compound metabolic process; GO:0008152 metabolic process; GO:0009058 biosynthetic process; GO:0009059 macromolecule biosynthetic proc…	GO:0005618 cell wall; GO:0005622 intracellular; GO:0005623 cell; GO:0005634 nucleus; GO:0005737 cytoplasm; GO:0005773 vacuole; GO:0005829 cytosol; GO:0005886 plasma membrane; GO:0005911 cell-cell junction; GO:0009506 plasmodesma; GO:0016020 membrane; GO:0030054 cell junction; GO:0030312 external encapsulating structure; GO:0043226 organelle; GO:0043227 membrane-bounded organelle; GO:0043229 intra…	GO:0003676 nucleic acid binding; GO:0003723 RNA binding; GO:0003746 translation elongation factor activity; GO:0003824 catalytic activity; GO:0004364 glutathione transferase activity; GO:0005488 binding; GO:0005507 copper ion binding; GO:0008135 translation factor activity, RNA binding; GO:0016740 transferase activity; GO:0016765 transferase activity, transferring alkyl or aryl (other than methyl…	K03233	EEF1G; elongation factor 1-gamma		PF02798; PF00043; PF00647	Glutathione S-transferase, N-terminal domain; Glutathione S-transferase, C-terminal domain; Elongation factor 1 gamma, conserved domain
Capana11g000242	246	0.575427	Down	0.0036844	K	Y328_SYNY3 Putative low molecular weight protein-tyrosine-phosphatase slr0328 OS=Synechocystis sp. (strain PCC 6803 / Kazusa) GN=slr0328 PE=3 SV=1	slr0328	1	1.92828e-41	139.7	K(1)HEETEVPDPYYGGAK	2	-1.2611	40	1.2114	1.11121	1.33837	1.33654	2.48462	1.32255	0.767616	0.604031	0.734982	0.867778	0.784416	0.722117	1.16933	1.3192	1.34738	0.691462	0.732546	0.864773	0.863787	0.91465	0.959016		0.394068	0.391509	extracellular				K01104	E3.1.3.48; protein-tyrosine phosphatase [EC:3.1.3.48]		PF01451	Low molecular weight phosphotyrosine protein phosphatase
Capana11g000330	676	0.367058	Down	0.000120276	K	TPLAT_ARATH Protein TPLATE OS=Arabidopsis thaliana GN=TPLATE PE=1 SV=1	TPLATE	1	7.97744e-54	172.51	TNALADSVNK(1)HQCR	2	-4.7506	20	1.35561	1.69615	1.46044	1.97311	1.57026	1.35825	0.549955	0.566234	0.540054		0.751861	1.05736	1.21103	1.27805	1.46974	0.59777	0.493174	0.860825	0.438739	0.76295	0.603528				chloroplast	GO:0006810 transport; GO:0006897 endocytosis; GO:0007275 multicellular organism development; GO:0009555 pollen development; GO:0016192 vesicle-mediated transport; GO:0032501 multicellular organismal process; GO:0032502 developmental process; GO:0048229 gametophyte development; GO:0048856 anatomical structure development; GO:0051179 localization; GO:0051234 establishment of localization; GO:009865…	GO:0005622 intracellular; GO:0005623 cell; GO:0005634 nucleus; GO:0005737 cytoplasm; GO:0005829 cytosol; GO:0005886 plasma membrane; GO:0005911 cell-cell junction; GO:0009504 cell plate; GO:0009506 plasmodesma; GO:0009524 phragmoplast; GO:0016020 membrane; GO:0030054 cell junction; GO:0043226 organelle; GO:0043227 membrane-bounded organelle; GO:0043229 intracellular organelle; GO:0043231 intracel…	GO:0005488 binding; GO:0005515 protein binding; GO:0042802 identical protein binding;
Capana11g000699	32	2.78618	Up	0.042123	K	H4_SOLLC Histone H4 OS=Solanum lycopersicum PE=3 SV=2	---	1	4.13597e-34	203.55	DNIQGITK(1)PAIR	2	3.1722	20	0.661376	0.490159		0.838369	0.861131		1.01926	1.79477	1.99856	1.4224	0.573235		1.95278	0.724863	0.576782	1.67553		1.42525	1.73018	0.837093	0.440887	0.696277		0.66515	nucleus	GO:0006323 DNA packaging; GO:0006325 chromatin organization; GO:0006333 chromatin assembly or disassembly; GO:0006334 nucleosome assembly; GO:0006996 organelle organization; GO:0009987 cellular process; GO:0016043 cellular component organization; GO:0022607 cellular component assembly; GO:0031497 chromatin assembly; GO:0034622 cellular macromolecular complex assembly; GO:0034728 nucleosome organi…	GO:0000228 nuclear chromosome; GO:0000785 chromatin; GO:0000786 nucleosome; GO:0000788 nuclear nucleosome; GO:0000790 nuclear chromatin; GO:0005622 intracellular; GO:0005623 cell; GO:0005634 nucleus; GO:0005694 chromosome; GO:0031974 membrane-enclosed lumen; GO:0031981 nuclear lumen; GO:0032991 macromolecular complex; GO:0032993 protein-DNA complex; GO:0043226 organelle; GO:0043227 membrane-bound…	GO:0003676 nucleic acid binding; GO:0003677 DNA binding; GO:0005488 binding; GO:0005515 protein binding; GO:0042393 histone binding; GO:0097159 organic cyclic compound binding; GO:1901363 heterocyclic compound binding;	K11254	H4; histone H4
Capana11g000862	383	0.544488	Down	0.0024992	K	protein SIEVE ELEMENT OCCLUSION B-like isoform X1	---	1	7.96162e-13	108.24	VLNLCHQK(1)IEER	2	-8.4058	16	1.27892	1.21031	1.08851	1.21324			0.73439	0.651208	0.562439		0.735661		1.09408	1.18857	1.12768	0.818	0.879798	0.803125	0.745562		0.424207				cytoplasm	GO:0009888 tissue development; GO:0010087 phloem or xylem histogenesis; GO:0010088 phloem development; GO:0032502 developmental process; GO:0048856 anatomical structure development;		GO:0005488 binding; GO:0005515 protein binding; GO:0042802 identical protein binding; GO:0042803 protein homodimerization activity; GO:0043621 protein self-association; GO:0046983 protein dimerization activity;
Capana11g001819	529	0.467348	Down	0.00055575	K	Y4837_ARATH KH domain-containing protein At4g18375 OS=Arabidopsis thaliana GN=At4g18375 PE=2 SV=1	At4g18375	1	7.84768e-09	131.06	PNSAGISNHNPSAYGK(1)SYGY	2	4.4052	19	1.05688	1.15764	1.13385	0.821363	0.702519	0.834783		0.544332	0.498904		1.25666	1.32119	1.42424	1.41623	1.49028	1.09099	1.10811	1.09194	0.78578		0.646793	0.466594			nucleus				K21444	PCBP3_4; poly(rC)-binding protein 3/4		PF00013	KH domain
Capana11g002306	74	0.634238	Down	0.004999	K	"RK15_PEA 50S ribosomal protein L15, chloroplastic (Fragment) OS=Pisum sativum GN=RPL15 PE=1 SV=1"	RPL15	1	3.62578e-06	112.93	LNNLGPQPGATK(1)NR	2	-6.3579	18	1.29722	1.22095		1.13398	1.31209	1.14259	0.847733	0.816239	0.731707	0.896386	1.02013	0.95641	1.17485				0.880435	0.758463		0.733214	0.573928				chloroplast	GO:0006412 translation; GO:0006518 peptide metabolic process; GO:0006807 nitrogen compound metabolic process; GO:0008152 metabolic process; GO:0009058 biosynthetic process; GO:0009059 macromolecule biosynthetic process; GO:0009719 response to endogenous stimulus; GO:0009725 response to hormone; GO:0009735 response to cytokinin; GO:0009987 cellular process; GO:0010033 response to organic substance…	GO:0000311 plastid large ribosomal subunit; GO:0000313 organellar ribosome; GO:0000315 organellar large ribosomal subunit; GO:0005622 intracellular; GO:0005623 cell; GO:0005737 cytoplasm; GO:0005840 ribosome; GO:0009507 chloroplast; GO:0009526 plastid envelope; GO:0009532 plastid stroma; GO:0009536 plastid; GO:0009547 plastid ribosome; GO:0009570 chloroplast stroma; GO:0009941 chloroplast envelop…	GO:0003735 structural constituent of ribosome; GO:0005198 structural molecule activity;	K02876	RP-L15, MRPL15, rplO; large subunit ribosomal protein L15	cann03010 Ribosome
Capana11g002318	394	0.66029	Down	0.042257	K	SYC_PELPD Cysteine--tRNA ligase OS=Pelobacter propionicus (strain DSM 2379) GN=cysS PE=3 SV=1	cysS	1	5.08849e-26	169.81	LSSQAQECIK(1)NLR	2	-7.6341	19	0.972769	1.11465	1.31146	1.41124	1.23156	1.36859	0.756757	0.745694	0.741799	0.611241	0.847156		1.20386	1.07102	1.07926	0.640481	0.681474	0.632075	0.600686		0.447396				cytoplasm	GO:0006082 organic acid metabolic process; GO:0006139 nucleobase-containing compound metabolic process; GO:0006399 tRNA metabolic process; GO:0006412 translation; GO:0006418 tRNA aminoacylation for protein translation; GO:0006423 cysteinyl-tRNA aminoacylation; GO:0006518 peptide metabolic process; GO:0006520 cellular amino acid metabolic process; GO:0006725 cellular aromatic compound metabolic pr…	GO:0005622 intracellular; GO:0005623 cell; GO:0005737 cytoplasm; GO:0005829 cytosol; GO:0044424 intracellular part; GO:0044444 cytoplasmic part; GO:0044464 cell part;	GO:0000166 nucleotide binding; GO:0003824 catalytic activity; GO:0004812 aminoacyl-tRNA ligase activity; GO:0004817 cysteine-tRNA ligase activity; GO:0005488 binding; GO:0005524 ATP binding; GO:0008144 drug binding; GO:0016874 ligase activity; GO:0016875 ligase activity, forming carbon-oxygen bonds; GO:0017076 purine nucleotide binding; GO:0030554 adenyl nucleotide binding; GO:0032553 ribonucleot…	K01883	CARS, cysS; cysteinyl-tRNA synthetase [EC:6.1.1.16]	cann00970 Aminoacyl-tRNA biosynthesis
Capana11g002356	232	0.62085	Down	0.0073198	K	K502_ACTDE Fruit protein pKIWI502 OS=Actinidia deliciosa GN=pKIWI502 PE=2 SV=1	pKIWI502	1	9.07226e-11	135.13	AK(1)NIFTPQSTGAVLCGQK	2	1.8039	25	1.23498	1.34463	1.38525	1.54102	1.27329	1.44652	0.68311	0.860749	0.917727	0.874068	0.856303	0.92	1.21077	1.08632	1.29782	0.965229	0.966538	0.869231	0.961026	0.799597	0.789256	0.682657	0.705234	0.717808	chloroplast							PF00175	Oxidoreductase NAD-binding domain
Capana12g000402	86	0.531485	Down	0.00025673	K	"RISB_ARATH 6,7-dimethyl-8-ribityllumazine synthase, chloroplastic OS=Arabidopsis thaliana GN=At2g44050 PE=2 SV=1"	At2g44050	1	2.3169e-21	163.43	ELNGSVVSAK(1)GHR	2	-7.2533	46	1.52813	1.4241	1.42445	1.1619	1.07652	1.20389	0.762525	0.72042	0.843198	1.01721	1.09585		1.13593		1.37778	1.04972	0.910755	1.11425	0.93599	1.02915	1.08333	0.677681	0.829866	0.632606	chloroplast		GO:0005622 intracellular; GO:0005623 cell; GO:0005737 cytoplasm; GO:0009507 chloroplast; GO:0009532 plastid stroma; GO:0009536 plastid; GO:0009570 chloroplast stroma; GO:0043226 organelle; GO:0043227 membrane-bounded organelle; GO:0043229 intracellular organelle; GO:0043231 intracellular membrane-bounded organelle; GO:0044422 organelle part; GO:0044424 intracellular part; GO:0044434 chloroplast p…		K00794	ribH, RIB4; 6,7-dimethyl-8-ribityllumazine synthase [EC:2.5.1.78]	cann00740 Riboflavin metabolism; cann01100 Metabolic pathways; cann01110 Biosynthesis of secondary metabolites	PF00885	6,7-dimethyl-8-ribityllumazine synthase
Capana12g000446	14	1.50606	Up	0.005557	K	RS6_ASPOF 40S ribosomal protein S6 OS=Asparagus officinalis GN=rps6 PE=2 SV=1	rps6	1	4.69395e-33	183.57	FNIANPTTGCQK(1)K	2	2.1514	26	0.735562	0.790468	0.815966	1.08784	1.43353	1.2744	1.17724		1.17421	0.662162	0.646245	0.740913	1.12894	1.08333	1.06863	5.62722	0.677626	0.941837	0.982429	0.917453	1.0583	0.908766	0.954386	0.913732	nucleus				K02991	RP-S6e, RPS6; small subunit ribosomal protein S6e	cann03010 Ribosome
Capana12g000479	161	3.30712	Up	0.018643	K	"GCSP_SOLTU Glycine dehydrogenase [decarboxylating], mitochondrial OS=Solanum tuberosum GN=GDCSP PE=2 SV=1"	GDCSP	1	2.11681e-24	114.5	TFLIASNCHPQTIDICK(1)TR	3	0.26558	21	0.302691	0.539535	0.549592	1.25297	1.0062	1.37699		1.3836	1.68501	1.18557	0.510671		1.70563	0.972198	1.03965	0.936978	0.952157		0.971308	0.456976	0.603448	1.21771	1.13497		cytoskeleton	GO:0001505 regulation of neurotransmitter levels; GO:0006082 organic acid metabolic process; GO:0006520 cellular amino acid metabolic process; GO:0006544 glycine metabolic process; GO:0006546 glycine catabolic process; GO:0006807 nitrogen compound metabolic process; GO:0008152 metabolic process; GO:0009056 catabolic process; GO:0009063 cellular amino acid catabolic process; GO:0009069 serine fami…	GO:0005576 extracellular region; GO:0005622 intracellular; GO:0005623 cell; GO:0005737 cytoplasm; GO:0005739 mitochondrion; GO:0009507 chloroplast; GO:0009526 plastid envelope; GO:0009532 plastid stroma; GO:0009534 chloroplast thylakoid; GO:0009536 plastid; GO:0009570 chloroplast stroma; GO:0009579 thylakoid; GO:0009941 chloroplast envelope; GO:0031967 organelle envelope; GO:0031975 envelope; GO:…		K00281	GLDC, gcvP; glycine dehydrogenase [EC:1.4.4.2]	cann00260 Glycine, serine and threonine metabolism; cann00630 Glyoxylate and dicarboxylate metabolism; cann01100 Metabolic pathways; cann01110 Biosynthesis of secondary metabolites; cann01200 Carbon metabolism	PF02347	Glycine cleavage system P-protein
Capana12g000479	177	1.62173	Up	0.0054161	K	"GCSP_SOLTU Glycine dehydrogenase [decarboxylating], mitochondrial OS=Solanum tuberosum GN=GDCSP PE=2 SV=1"	GDCSP	1	0.00298948	123.5	VHLK(1)DIDYK	2	-5.7637	23	0.660314	0.894186	0.749125	0.43943	0.228005	0.887393	1.2761	1.20358	1.25617	0.994109	1.15244	1.27778	1.05281	0.973936		1.28474	1.31451	1.15118	0.976371	0.869674	0.897414	1.27188	1.15849	0.79799	cytoskeleton	GO:0001505 regulation of neurotransmitter levels; GO:0006082 organic acid metabolic process; GO:0006520 cellular amino acid metabolic process; GO:0006544 glycine metabolic process; GO:0006546 glycine catabolic process; GO:0006807 nitrogen compound metabolic process; GO:0008152 metabolic process; GO:0009056 catabolic process; GO:0009063 cellular amino acid catabolic process; GO:0009069 serine fami…	GO:0005576 extracellular region; GO:0005622 intracellular; GO:0005623 cell; GO:0005737 cytoplasm; GO:0005739 mitochondrion; GO:0009507 chloroplast; GO:0009526 plastid envelope; GO:0009532 plastid stroma; GO:0009534 chloroplast thylakoid; GO:0009536 plastid; GO:0009570 chloroplast stroma; GO:0009579 thylakoid; GO:0009941 chloroplast envelope; GO:0031967 organelle envelope; GO:0031975 envelope; GO:…		K00281	GLDC, gcvP; glycine dehydrogenase [EC:1.4.4.2]	cann00260 Glycine, serine and threonine metabolism; cann00630 Glyoxylate and dicarboxylate metabolism; cann01100 Metabolic pathways; cann01110 Biosynthesis of secondary metabolites; cann01200 Carbon metabolism	PF02347	Glycine cleavage system P-protein
Capana12g000499	70	0.572947	Down	6.4055e-05	K	PYL2_ARATH Abscisic acid receptor PYL2 OS=Arabidopsis thaliana GN=PYL2 PE=1 SV=1	PYL2	1	0.00141708	101.41	HFIK(1)SCK	2	-3.1595	21	1.36495	1.36885	1.4081	1.24321	1.50479	1.66315	0.833091	0.748273	0.791725	0.760614	0.774806	0.7669	1.07288	1.28889	1.44859		0.923833		0.718029	0.812702	0.87949	0.54476		0.442857	cytoskeleton	GO:0001101 response to acid chemical; GO:0006950 response to stress; GO:0007154 cell communication; GO:0007165 signal transduction; GO:0007275 multicellular organism development; GO:0009266 response to temperature stimulus; GO:0009409 response to cold; GO:0009414 response to water deprivation; GO:0009415 response to water; GO:0009628 response to abiotic stimulus; GO:0009719 response to endogenous…	GO:0005622 intracellular; GO:0005623 cell; GO:0005634 nucleus; GO:0005737 cytoplasm; GO:0005829 cytosol; GO:0043226 organelle; GO:0043227 membrane-bounded organelle; GO:0043229 intracellular organelle; GO:0043231 intracellular membrane-bounded organelle; GO:0044424 intracellular part; GO:0044444 cytoplasmic part; GO:0044464 cell part;	GO:0005488 binding; GO:0005515 protein binding; GO:0008289 lipid binding; GO:0010427 abscisic acid binding; GO:0019840 isoprenoid binding; GO:0031406 carboxylic acid binding; GO:0033293 monocarboxylic acid binding; GO:0036094 small molecule binding; GO:0042562 hormone binding; GO:0042802 identical protein binding; GO:0042803 protein homodimerization activity; GO:0043167 ion binding; GO:0043168 an…	K14496	PYL; abscisic acid receptor PYR/PYL family	cann04016 MAPK signaling pathway - plant; cann04075 Plant hormone signal transduction
Capana12g000555	278	7.2794	Up	0.00082106	K	"G3PB_ARATH Glyceraldehyde-3-phosphate dehydrogenase B, chloroplastic OS=Arabidopsis thaliana GN=GAPB PE=1 SV=2"	GAPB	1	0.000291779	87.895	AVSLVLPQLK(1)GK	2	-9.5216	12		0.219258	0.271493	0.347206			1.94983	1.47222	1.93651							1.10183	1.01929		0.552461	0.528986	0.511949			1.28962	cytoplasm				K05298	GAPA; glyceraldehyde-3-phosphate dehydrogenase (NADP+) (phosphorylating) [EC:1.2.1.13]	cann00710 Carbon fixation in photosynthetic organisms; cann01100 Metabolic pathways; cann01200 Carbon metabolism	PF00044; PF02800	Glyceraldehyde 3-phosphate dehydrogenase, NAD binding domain; Glyceraldehyde 3-phosphate dehydrogenase, C-terminal domain
Capana12g000555	415	0.492879	Down	0.0053369	K	"G3PB_ARATH Glyceraldehyde-3-phosphate dehydrogenase B, chloroplastic OS=Arabidopsis thaliana GN=GAPB PE=1 SV=2"	GAPB	0.999997	1.85219e-11	159.12	TNPADKECK(1)VYE	2	-3.7017	19		1.71694	1.58597	1.68133	1.80049	1.55605	0.786789	0.841146		0.792471			1.27186	1.2805	1.29494	0.032587	0.836066	0.816822	0.772516		0.789522	0.512346	0.580851	0.590164	cytoplasm				K05298	GAPA; glyceraldehyde-3-phosphate dehydrogenase (NADP+) (phosphorylating) [EC:1.2.1.13]	cann00710 Carbon fixation in photosynthetic organisms; cann01100 Metabolic pathways; cann01200 Carbon metabolism	PF00044; PF02800	Glyceraldehyde 3-phosphate dehydrogenase, NAD binding domain; Glyceraldehyde 3-phosphate dehydrogenase, C-terminal domain
Capana12g000609	512	0.619392	Down	0.039356	K	MSL8_ARATH Mechanosensitive ion channel protein 8 OS=Arabidopsis thaliana GN=MSL8 PE=2 SV=2	MSL8	1	9.03719e-34	199.4	YICDK(1)YGSQGNK	2	3.7849	42	1.71357		1.42247	1.57716	1.95579	1.40435		0.99814	0.944297	0.900888	0.85037	0.969436	1.22904	2.545	1.25527	1.09404	0.789706	0.931601	0.873057	0.713671	0.816302	0.438404	0.55102	0.55873	cytoplasm				K22048	MSL4S; mechanosensitive ion channel protein 4/5/6/7/8/9/10		PF02798; PF00043	Glutathione S-transferase, N-terminal domain; Glutathione S-transferase, C-terminal domain
Capana12g000742	274	0.610971	Down	0.025463	K	RD21A_ARATH Cysteine proteinase RD21a OS=Arabidopsis thaliana GN=RD21A PE=1 SV=1	RD21A	1	1.91479e-33	175.38	ALVHQPVSIAVEAGGK(1)DFQHYK	3	-0.23174	34	2.03551	1.48638	1.30695	1.47447	1.3118	1.33668	0.914754	0.991402	1.04413	0.791115	0.709834	0.81094	1.15441	1.23944	1.13533	1.00609	0.866249	0.799802	0.784351	0.78626	0.756537	0.744981	0.837459	0.768352	extracellular	GO:0006508 proteolysis; GO:0006807 nitrogen compound metabolic process; GO:0007275 multicellular organism development; GO:0008152 metabolic process; GO:0009056 catabolic process; GO:0009057 macromolecule catabolic process; GO:0009555 pollen development; GO:0009987 cellular process; GO:0019538 protein metabolic process; GO:0030163 protein catabolic process; GO:0032501 multicellular organismal proc…	GO:0000323 lytic vacuole; GO:0005576 extracellular region; GO:0005615 extracellular space; GO:0005622 intracellular; GO:0005623 cell; GO:0005737 cytoplasm; GO:0005764 lysosome; GO:0005773 vacuole; GO:0043226 organelle; GO:0043227 membrane-bounded organelle; GO:0043229 intracellular organelle; GO:0043231 intracellular membrane-bounded organelle; GO:0044421 extracellular region part; GO:0044424 int…	GO:0003824 catalytic activity; GO:0004175 endopeptidase activity; GO:0004197 cysteine-type endopeptidase activity; GO:0008233 peptidase activity; GO:0008234 cysteine-type peptidase activity; GO:0016787 hydrolase activity; GO:0070011 peptidase activity, acting on L-amino acid peptides;				PF08246; PF00112	Cathepsin propeptide inhibitor domain (I29); Papain family cysteine protease
Capana12g000742	280	0.395082	Down	0.0020019	K	RD21A_ARATH Cysteine proteinase RD21a OS=Arabidopsis thaliana GN=RD21A PE=1 SV=1	RD21A	1	1.9404e-189	268.98	DFQHYK(1)SGIFTGR	2	1.6965	51	2.45421	1.80156	1.6247	1.77086	1.65256	1.59086	0.813115	0.733448	0.776699	0.613422	0.848101	0.744722	1.09454	1.26327	1.21694	0.974421	0.895507	0.80773	0.650763	0.772901	0.706943	0.518216	0.626238		extracellular	GO:0006508 proteolysis; GO:0006807 nitrogen compound metabolic process; GO:0007275 multicellular organism development; GO:0008152 metabolic process; GO:0009056 catabolic process; GO:0009057 macromolecule catabolic process; GO:0009555 pollen development; GO:0009987 cellular process; GO:0019538 protein metabolic process; GO:0030163 protein catabolic process; GO:0032501 multicellular organismal proc…	GO:0000323 lytic vacuole; GO:0005576 extracellular region; GO:0005615 extracellular space; GO:0005622 intracellular; GO:0005623 cell; GO:0005737 cytoplasm; GO:0005764 lysosome; GO:0005773 vacuole; GO:0043226 organelle; GO:0043227 membrane-bounded organelle; GO:0043229 intracellular organelle; GO:0043231 intracellular membrane-bounded organelle; GO:0044421 extracellular region part; GO:0044424 int…	GO:0003824 catalytic activity; GO:0004175 endopeptidase activity; GO:0004197 cysteine-type endopeptidase activity; GO:0008233 peptidase activity; GO:0008234 cysteine-type peptidase activity; GO:0016787 hydrolase activity; GO:0070011 peptidase activity, acting on L-amino acid peptides;				PF08246; PF00112	Cathepsin propeptide inhibitor domain (I29); Papain family cysteine protease
Capana12g000742	241	0.544421	Down	0.027544	K	RD21A_ARATH Cysteine proteinase RD21a OS=Arabidopsis thaliana GN=RD21A PE=1 SV=1	RD21A	1	1.34678e-53	169.52	VVK(1)IDSYEDVPENNER	2	-2.4912	24	2.34766	1.52789	1.35132	1.52927	1.39087	1.42698	0.883607	0.968186	0.993822	0.831758	0.762415	0.854127	1.27731	1.23185	1.21074	1.03776	0.910136	0.829534	0.837786	0.756679	0.722272	0.550186	0.655116	0.579119	extracellular	GO:0006508 proteolysis; GO:0006807 nitrogen compound metabolic process; GO:0007275 multicellular organism development; GO:0008152 metabolic process; GO:0009056 catabolic process; GO:0009057 macromolecule catabolic process; GO:0009555 pollen development; GO:0009987 cellular process; GO:0019538 protein metabolic process; GO:0030163 protein catabolic process; GO:0032501 multicellular organismal proc…	GO:0000323 lytic vacuole; GO:0005576 extracellular region; GO:0005615 extracellular space; GO:0005622 intracellular; GO:0005623 cell; GO:0005737 cytoplasm; GO:0005764 lysosome; GO:0005773 vacuole; GO:0043226 organelle; GO:0043227 membrane-bounded organelle; GO:0043229 intracellular organelle; GO:0043231 intracellular membrane-bounded organelle; GO:0044421 extracellular region part; GO:0044424 int…	GO:0003824 catalytic activity; GO:0004175 endopeptidase activity; GO:0004197 cysteine-type endopeptidase activity; GO:0008233 peptidase activity; GO:0008234 cysteine-type peptidase activity; GO:0016787 hydrolase activity; GO:0070011 peptidase activity, acting on L-amino acid peptides;				PF08246; PF00112	Cathepsin propeptide inhibitor domain (I29); Papain family cysteine protease
Capana12g001027	606	2.01264	Up	0.019662	K	VATA_DAUCA V-type proton ATPase catalytic subunit A OS=Daucus carota PE=2 SV=1	---	1	7.1205e-241	281.24	FEDPAEGEDVLVAK(1)FQK	2	0.29477	26	0.802315		0.803074	0.812133		1.11234	1.58065	1.65042		0.928315			0.988482	0.785132	0.784314	0.745813	0.835154	1.4111		0.93865			0.67866		cytoplasm	GO:0006810 transport; GO:0006811 ion transport; GO:0006812 cation transport; GO:0006950 response to stress; GO:0006970 response to osmotic stress; GO:0006996 organelle organization; GO:0007030 Golgi organization; GO:0007275 multicellular organism development; GO:0009555 pollen development; GO:0009628 response to abiotic stimulus; GO:0009651 response to salt stress; GO:0009987 cellular process; GO…	GO:0000325 plant-type vacuole; GO:0005576 extracellular region; GO:0005618 cell wall; GO:0005622 intracellular; GO:0005623 cell; GO:0005737 cytoplasm; GO:0005773 vacuole; GO:0005774 vacuolar membrane; GO:0005794 Golgi apparatus; GO:0005886 plasma membrane; GO:0005911 cell-cell junction; GO:0009506 plasmodesma; GO:0009507 chloroplast; GO:0009526 plastid envelope; GO:0009536 plastid; GO:0009941 chl…	GO:0002020 protease binding; GO:0003824 catalytic activity; GO:0005215 transporter activity; GO:0005488 binding; GO:0005515 protein binding; GO:0008324 cation transmembrane transporter activity; GO:0015075 ion transmembrane transporter activity; GO:0015077 monovalent inorganic cation transmembrane transporter activity; GO:0015078 hydrogen ion transmembrane transporter activity; GO:0015318 inorgan…	K02145	ATPeV1A, ATP6A; V-type H+-transporting ATPase subunit A [EC:3.6.3.14]	cann00190 Oxidative phosphorylation; cann01100 Metabolic pathways; cann04145 Phagosome	PF02874; PF00006	ATP synthase alpha/beta family, beta-barrel domain; ATP synthase alpha/beta family, nucleotide-binding domain
Capana12g001237	199	0.660909	Down	0.02198	K	RH20_ARATH DEAD-box ATP-dependent RNA helicase 20 OS=Arabidopsis thaliana GN=RH20 PE=1 SV=1	RH20	1	3.30545e-07	108.93	IK(1)NTCIYGGVPK	2	-7.2469	20	1.18498	1.05425	1.20796	1.57852	1.85064	1.61319	0.838517	0.680338		0.813373	0.663951	0.827309	1.33402	1.33333	1.1803	0.896956	0.935811	0.765432	0.726244			0.48535		0.503351	cytoplasm	GO:0006139 nucleobase-containing compound metabolic process; GO:0006725 cellular aromatic compound metabolic process; GO:0006807 nitrogen compound metabolic process; GO:0008152 metabolic process; GO:0009987 cellular process; GO:0010501 RNA secondary structure unwinding; GO:0016070 RNA metabolic process; GO:0034641 cellular nitrogen compound metabolic process; GO:0043170 macromolecule metabolic pr…	GO:0005622 intracellular; GO:0005623 cell; GO:0005634 nucleus; GO:0005730 nucleolus; GO:0005737 cytoplasm; GO:0031974 membrane-enclosed lumen; GO:0031981 nuclear lumen; GO:0043226 organelle; GO:0043227 membrane-bounded organelle; GO:0043228 non-membrane-bounded organelle; GO:0043229 intracellular organelle; GO:0043231 intracellular membrane-bounded organelle; GO:0043232 intracellular non-membrane…	GO:0003724 RNA helicase activity; GO:0003824 catalytic activity; GO:0004004 ATP-dependent RNA helicase activity; GO:0004386 helicase activity; GO:0008026 ATP-dependent helicase activity; GO:0008186 RNA-dependent ATPase activity; GO:0016462 pyrophosphatase activity; GO:0016787 hydrolase activity; GO:0016817 hydrolase activity, acting on acid anhydrides; GO:0016818 hydrolase activity, acting on aci…	K12823	DDX5, DBP2; ATP-dependent RNA helicase DDX5/DBP2 [EC:3.6.4.13]	cann03040 Spliceosome	PF00270	DEAD/DEAH box helicase
Capana12g001353	428	0.497493	Down	0.0197049	K	"CLPAB_SOLLC ATP-dependent Clp protease ATP-binding subunit clpA homolog CD4B, chloroplastic OS=Solanum lycopersicum GN=CD4B PE=3 SV=1"	CD4B	1	7.88305e-07	159.12	K(1)HIEKDPALER	2	-6.7689	41	1.31297	1.39662	1.48636		1.15928	1.18287	0.786624	0.460079	0.840749		1.0739	0.93321	1.05171	1.07392	0.780311	0.621074	0.855711	0.866861	0.926598	1.11739	1.02318	1.49797	1.13307	0.878846	chloroplast				K03696	clpC; ATP-dependent Clp protease ATP-binding subunit ClpC		PF00004; PF07724; PF10431	ATPase family associated with various cellular activities (AAA); AAA domain (Cdc48 subfamily); C-terminal, D2-small domain, of ClpB protein
Capana12g001353	801	2.08993	Up	0.00084175	K	"CLPAB_SOLLC ATP-dependent Clp protease ATP-binding subunit clpA homolog CD4B, chloroplastic OS=Solanum lycopersicum GN=CD4B PE=3 SV=1"	CD4B	1	0.000227419	123.42	IK(1)SLVTEELK	2	-8.1173	20	0.570489	0.632519	0.556914		0.93038	1.24841		1.19447	1.25761		0.643592	1.24954	1.37849	1.06468	0.912953	1.10436		1.1137	1.14767	0.874893	0.784549	1.51829	1.44227	1.29038	chloroplast				K03696	clpC; ATP-dependent Clp protease ATP-binding subunit ClpC		PF00004; PF07724; PF10431	ATPase family associated with various cellular activities (AAA); AAA domain (Cdc48 subfamily); C-terminal, D2-small domain, of ClpB protein
Capana12g001880	124	0.644384	Down	0.0055758	K	PSD12_DICDI 26S proteasome non-ATPase regulatory subunit 12 OS=Dictyostelium discoideum GN=psmD12 PE=2 SV=1	psmD12	1	0.000202369	102.55	LCLDHK(1)DYVR	2	-6.5955	17	1.24169	1.25397	1.14326	1.15181	1.14801	1.14322		0.832258	0.730981	0.741419	0.64745		0.849038	1.04267	1.06591		0.730228	0.779817	0.710145			0.735821			nucleus	GO:0006508 proteolysis; GO:0006511 ubiquitin-dependent protein catabolic process; GO:0006807 nitrogen compound metabolic process; GO:0007275 multicellular organism development; GO:0008152 metabolic process; GO:0009056 catabolic process; GO:0009057 macromolecule catabolic process; GO:0009987 cellular process; GO:0010498 proteasomal protein catabolic process; GO:0019538 protein metabolic process; G…	GO:0000502 proteasome complex; GO:0005622 intracellular; GO:0005623 cell; GO:0005634 nucleus; GO:0005737 cytoplasm; GO:0005838 proteasome regulatory particle; GO:0008541 proteasome regulatory particle, lid subcomplex; GO:0022624 proteasome accessory complex; GO:0031595 nuclear proteasome complex; GO:0031974 membrane-enclosed lumen; GO:0031981 nuclear lumen; GO:0032991 macromolecular complex; GO:0…		K03035	PSMD12, RPN5; 26S proteasome regulatory subunit N5	cann03050 Proteasome	PF01399	PCI domain
Capana12g002068	128	2.42741	Up	0.024115	K	Putative ethanolamine utilization eutQ-like	---	1	0	293.43	GMSCTWDVSEEVDK(1)HYK	2	0.23705	153	0.757831	0.40566	0.400839	0.503282	0.518738	0.59005	0.920635	1.4799	1.39674	1.44726	0.849215	1.52802	1.44023	0.658303	0.767251	1.54079	1.32279	1.05738	1.36088	0.720464	0.605593	1.09909	1.09817	1.22002	chloroplast				K06995	K06995; uncharacterized protein		PF05899	Protein of unknown function (DUF861)
Capana12g002101	57	1.56434	Up	0.0119164	K	CP19C_ARATH Peptidyl-prolyl cis-trans isomerase CYP19-3 OS=Arabidopsis thaliana GN=CYP19-3 PE=2 SV=2	CYP19-3	1	8.54733e-08	146.27	PLHYK(1)GSGFHR	3	-2.644	29	0.732212	0.737606		1.36374	1.08333	1.48654	1.20595	1.09335		0.870184	0.8594	0.944	1.18427	1.01259	0.683744	0.935564		0.918618	1.18465	1.0226	1.02873		1.01869	0.90732	cytoplasm	GO:0000413 protein peptidyl-prolyl isomerization; GO:0006464 cellular protein modification process; GO:0006807 nitrogen compound metabolic process; GO:0007154 cell communication; GO:0007165 signal transduction; GO:0008152 metabolic process; GO:0009987 cellular process; GO:0010035 response to inorganic substance; GO:0010038 response to metal ion; GO:0018193 peptidyl-amino acid modification; GO:001…	GO:0005622 intracellular; GO:0005623 cell; GO:0005737 cytoplasm; GO:0005739 mitochondrion; GO:0005794 Golgi apparatus; GO:0005829 cytosol; GO:0012505 endomembrane system; GO:0043226 organelle; GO:0043227 membrane-bounded organelle; GO:0043229 intracellular organelle; GO:0043231 intracellular membrane-bounded organelle; GO:0044424 intracellular part; GO:0044444 cytoplasmic part; GO:0044464 cell pa…	GO:0003755 peptidyl-prolyl cis-trans isomerase activity; GO:0003824 catalytic activity; GO:0005488 binding; GO:0008144 drug binding; GO:0016018 cyclosporin A binding; GO:0016853 isomerase activity; GO:0016859 cis-trans isomerase activity; GO:0033218 amide binding; GO:0042277 peptide binding;	K01802	E5.2.1.8; peptidylprolyl isomerase [EC:5.2.1.8]		PF00160	Cyclophilin type peptidyl-prolyl cis-trans isomerase/CLD
Capana12g002102	372	0.629893	Down	0.0122049	K	"Rubisco accumulation factor 1, chloroplastic"	---	0.999933	4.9619e-27	119.52	K(1)YKEEPVLVVADR	2	-6.6985	18	1.09506	1.11825			1.41837	1.19393	0.790759	0.637916	0.662544	0.768251	0.948718	0.795435	1.07482	1.25204	1.07512		0.744865		0.87312	1.04558	0.914027		1.11942		chloroplast	GO:0009987 cellular process; GO:0016043 cellular component organization; GO:0022607 cellular component assembly; GO:0034622 cellular macromolecular complex assembly; GO:0043933 macromolecular complex subunit organization; GO:0044085 cellular component biogenesis; GO:0065003 macromolecular complex assembly; GO:0071840 cellular component organization or biogenesis;	GO:0005622 intracellular; GO:0005623 cell; GO:0005737 cytoplasm; GO:0009507 chloroplast; GO:0009532 plastid stroma; GO:0009536 plastid; GO:0009570 chloroplast stroma; GO:0043226 organelle; GO:0043227 membrane-bounded organelle; GO:0043229 intracellular organelle; GO:0043231 intracellular membrane-bounded organelle; GO:0044422 organelle part; GO:0044424 intracellular part; GO:0044434 chloroplast p…
Capana12g002501	247	0.660578	Down	0.00049639	K	PGP_BOVIN Phosphoglycolate phosphatase OS=Bos taurus GN=PGP PE=2 SV=1	PGP	1	6.53112e-82	253.1	IQK(1)SQICMVGDR	2	0.13188	51	1.33882	1.44994	1.26936	1.40531	1.51116	1.68233	0.881988	0.887286	0.911439	0.881701	0.870336	0.88303	1.37125	1.29347	1.2751	1.00112	0.972222	0.956337	0.787879	0.759907	0.760844	0.552933	0.535817	0.597275	nucleus				K19269	PGP, PGLP; phosphoglycolate phosphatase [EC:3.1.3.18 3.1.3.48]	cann00630 Glyoxylate and dicarboxylate metabolism; cann01100 Metabolic pathways; cann01110 Biosynthesis of secondary metabolites; cann01200 Carbon metabolism	PF13344; PF13242	Haloacid dehalogenase-like hydrolase; HAD-hyrolase-like
Capana12g002662	87	0.520205	Down	0.0149593	K	14335_SOLTU 14-3-3-like protein 16R OS=Solanum tuberosum PE=2 SV=1	---	1	3.84562e-21	149.02	GNEEHVVSIK(1)EYR	2	-7.7228	20	1.44249	1.36293	1.09811	1.48261	1.3956		0.741617	0.61214		0.904641	0.86526	0.806931	0.491194	1.18237	1.13074	0.63253	0.762195	0.925134	0.93578	0.913744	0.904762			1.18458	plasma membrane				K06630	YWHAE; 14-3-3 protein epsilon		PF00244	14-3-3 protein
Capana12g002755	3	1.55888	Up	0.0016584	K	MTDH_FRAAN Probable mannitol dehydrogenase OS=Fragaria ananassa GN=CAD PE=2 SV=1	CAD	1	5.13022e-07	117.99	AK(1)SYENEHPIK	2	-7.1825	21	0.774142	0.933862	0.901203	1.06495	0.916058	1.31796	1.31736	1.37154	1.37854	1.24144			1.0977	1.17048	1.32262	0.984678	1.29289	1.01631	0.77363	0.825833	0.951292	0.884909		0.84863	cytoplasm				K23232	cann00902 Monoterpenoid biosynthesis; cann01100 Metabolic pathways; cann01110 Biosynthesis of secondary metabolites		PF08240	Alcohol dehydrogenase GroES-like domain
Capana12g002820	156	1.69067	Up	7.8255e-05	K	UGPA_SOLTU UTP--glucose-1-phosphate uridylyltransferase OS=Solanum tuberosum PE=1 SV=3	---	1	3.01422e-51	160.37	IVEK(1)YANSNIDIHTFNQSQYPR	3	-0.10846	48	0.862511	0.86824	0.845168	0.95	0.958293	0.954325	1.36757	1.51449	1.47297	0.964113	0.890196	1.13503		0.893764	0.882759	1.09071	1.08539	1.03483	1.16885	1.16627	1.10576	0.563171	0.643707	0.585654	cytoplasm	GO:0005975 carbohydrate metabolic process; GO:0005976 polysaccharide metabolic process; GO:0005977 glycogen metabolic process; GO:0005984 disaccharide metabolic process; GO:0005985 sucrose metabolic process; GO:0006011 UDP-glucose metabolic process; GO:0006073 cellular glucan metabolic process; GO:0006091 generation of precursor metabolites and energy; GO:0006112 energy reserve metabolic process;…	GO:0005622 intracellular; GO:0005623 cell; GO:0005737 cytoplasm; GO:0005829 cytosol; GO:0005886 plasma membrane; GO:0016020 membrane; GO:0042995 cell projection; GO:0044424 intracellular part; GO:0044444 cytoplasmic part; GO:0044464 cell part; GO:0071944 cell periphery; GO:0090406 pollen tube;	GO:0003824 catalytic activity; GO:0003983 UTP:glucose-1-phosphate uridylyltransferase activity; GO:0016740 transferase activity; GO:0016772 transferase activity, transferring phosphorus-containing groups; GO:0016779 nucleotidyltransferase activity; GO:0051748 UTP-monosaccharide-1-phosphate uridylyltransferase activity; GO:0070569 uridylyltransferase activity;	K00963	UGP2, galU, galF; UTP--glucose-1-phosphate uridylyltransferase [EC:2.7.7.9]	cann00040 Pentose and glucuronate interconversions; cann00052 Galactose metabolism; cann00500 Starch and sucrose metabolism; cann00520 Amino sugar and nucleotide sugar metabolism; cann01100 Metabolic pathways
Capana12g002820	247	2.7801	Up	0.0011232	K	UGPA_SOLTU UTP--glucose-1-phosphate uridylyltransferase OS=Solanum tuberosum PE=1 SV=3	---	1	8.85922e-18	171.51	ILNHLILNK(1)NEYCMEVTPK	3	-7.8133	52	0.537122	0.552606	0.595661	0.830392	0.843841		1.21982	1.7252	1.74054	1.50824	0.864706	0.94227	1.54333	0.699769	0.794253	1.25	1.32135	0.850562	1.92747	1.10843	0.897767	0.563171	0.494898	0.535021	cytoplasm	GO:0005975 carbohydrate metabolic process; GO:0005976 polysaccharide metabolic process; GO:0005977 glycogen metabolic process; GO:0005984 disaccharide metabolic process; GO:0005985 sucrose metabolic process; GO:0006011 UDP-glucose metabolic process; GO:0006073 cellular glucan metabolic process; GO:0006091 generation of precursor metabolites and energy; GO:0006112 energy reserve metabolic process;…	GO:0005622 intracellular; GO:0005623 cell; GO:0005737 cytoplasm; GO:0005829 cytosol; GO:0005886 plasma membrane; GO:0016020 membrane; GO:0042995 cell projection; GO:0044424 intracellular part; GO:0044444 cytoplasmic part; GO:0044464 cell part; GO:0071944 cell periphery; GO:0090406 pollen tube;	GO:0003824 catalytic activity; GO:0003983 UTP:glucose-1-phosphate uridylyltransferase activity; GO:0016740 transferase activity; GO:0016772 transferase activity, transferring phosphorus-containing groups; GO:0016779 nucleotidyltransferase activity; GO:0051748 UTP-monosaccharide-1-phosphate uridylyltransferase activity; GO:0070569 uridylyltransferase activity;	K00963	UGP2, galU, galF; UTP--glucose-1-phosphate uridylyltransferase [EC:2.7.7.9]	cann00040 Pentose and glucuronate interconversions; cann00052 Galactose metabolism; cann00500 Starch and sucrose metabolism; cann00520 Amino sugar and nucleotide sugar metabolism; cann01100 Metabolic pathways
Capana12g002824	240	0.494091	Down	0.0143184	K	DCE_PETHY Glutamate decarboxylase OS=Petunia hybrida GN=GAD PE=1 SV=1	GAD	1	8.95216e-12	136.94	LPLVK(1)SINVSGHK	2	-31.465	24	1.13505	1.24556	1.31395	1.37092	1.48197	1.41676	0.761523	0.426842	0.637089		0.87	0.517791	1.26873	1.56543		1.04471	1.05944	1.12596	0.756303	0.963208	0.874674	0.607673	0.569444	0.655844	cytoplasm				K01580	E4.1.1.15, gadB, gadA, GAD; glutamate decarboxylase [EC:4.1.1.15]	cann00250 Alanine, aspartate and glutamate metabolism; cann00410 beta-Alanine metabolism; cann00430 Taurine and hypotaurine metabolism; cann00650 Butanoate metabolism; cann01100 Metabolic pathways; cann01110 Biosynthesis of secondary metabolites	PF00282	Pyridoxal-dependent decarboxylase conserved domain
Capana12g002824	441	0.501059	Down	0.008763	K	DCE_PETHY Glutamate decarboxylase OS=Petunia hybrida GN=GAD PE=1 SV=1	GAD	1	1.34191e-73	196.38	AAASGVDIVHHK(1)TDR	2	-4.0235	34	1.42371	1.2574	1.27484	1.19178	1.25792	1.11732	0.820641	0.500505	0.661017		1.0425	0.84908	1.33388	1.40388	1.42812	0.386071	0.832168	0.933617	0.616246	1.13113	0.546562	0.868812	0.632576		cytoplasm				K01580	E4.1.1.15, gadB, gadA, GAD; glutamate decarboxylase [EC:4.1.1.15]	cann00250 Alanine, aspartate and glutamate metabolism; cann00410 beta-Alanine metabolism; cann00430 Taurine and hypotaurine metabolism; cann00650 Butanoate metabolism; cann01100 Metabolic pathways; cann01110 Biosynthesis of secondary metabolites	PF00282	Pyridoxal-dependent decarboxylase conserved domain
Protein accession	Position	A4/A1 Ratio	Regulated Type	A4/A1 P value	Amino acid	Protein description	Gene name	Localization probability	PEP	Score	Modified sequence	Charge	Mass error [ppm]	MS/MS Count	A1_1	A1_2	A1_3	A2_1	A2_2	A2_3	A3_1	A3_2	A3_3	A4_1	A4_2	A4_3	B1_1	B1_2	B1_3	B2_1	B2_2	B2_3	B3_1	B3_2	B3_3	B4_1	B4_2	B4_3	Subcellular localization	Biological Process	Cellular Component	Molecular Function	KEGG KO No.	KEGG Gene	KEGG pathway	Pfam ID	Domain description
Capana00g000900	128	0.504621	Down	0.00112389	K	"ADT1_SOLTU ADP,ATP carrier protein, mitochondrial OS=Solanum tuberosum GN=ANT PE=2 SV=1"	ANT	1	1.52871e-62	216.04	LSEPYK(1)GIGDCFGR	2	-4.7412	24	1.47924	1.4061	1.38444	1.46728	1.57385	1.52498	0.903865	0.958643	0.90481	0.765217	0.671199		1.045	1.11154	1.24022	1.14891	1.08637	1.01414	0.938338	0.787072	0.759662	0.480721	0.504325	0.475867	chloroplast		GO:0005622 intracellular; GO:0005623 cell; GO:0005737 cytoplasm; GO:0005739 mitochondrion; GO:0005740 mitochondrial envelope; GO:0005743 mitochondrial inner membrane; GO:0016020 membrane; GO:0019866 organelle inner membrane; GO:0031090 organelle membrane; GO:0031966 mitochondrial membrane; GO:0031967 organelle envelope; GO:0031975 envelope; GO:0043226 organelle; GO:0043227 membrane-bounded organe…		K05863	SLC25A4S, ANT; solute carrier family 25 (mitochondrial adenine nucleotide translocator), member 4/5/6/31
Capana00g001018	402	0.612863	Down	0.008021	K	SIR_SYNY3 Sulfite reductase [ferredoxin] OS=Synechocystis sp. (strain PCC 6803 / Kazusa) GN=sir PE=1 SV=1	sir	1	3.46514e-19	111.98	K(1)FEPCHELPEWEFK	2	-1.4815	32	1.13675	1.05778	1.09991	1.39589	1.31507		0.675042	0.570707	0.861893	0.73913	0.606897		1.38329	0.925164		1.03707	0.895062	0.924925	0.7082	0.698364	0.851606				cytoplasm	GO:0006275 regulation of DNA replication; GO:0006323 DNA packaging; GO:0006355 regulation of transcription, DNA-templated; GO:0006790 sulfur compound metabolic process; GO:0006950 response to stress; GO:0006970 response to osmotic stress; GO:0006996 organelle organization; GO:0008152 metabolic process; GO:0009266 response to temperature stimulus; GO:0009409 response to cold; GO:0009628 response t…	GO:0005576 extracellular region; GO:0005622 intracellular; GO:0005623 cell; GO:0005737 cytoplasm; GO:0009295 nucleoid; GO:0009507 chloroplast; GO:0009526 plastid envelope; GO:0009532 plastid stroma; GO:0009536 plastid; GO:0009570 chloroplast stroma; GO:0009941 chloroplast envelope; GO:0010319 stromule; GO:0016020 membrane; GO:0031967 organelle envelope; GO:0031975 envelope; GO:0042644 chloroplast…	GO:0003676 nucleic acid binding; GO:0003677 DNA binding; GO:0003690 double-stranded DNA binding; GO:0003824 catalytic activity; GO:0005488 binding; GO:0005507 copper ion binding; GO:0016002 sulfite reductase activity; GO:0016491 oxidoreductase activity; GO:0016667 oxidoreductase activity, acting on a sulfur group of donors; GO:0016673 oxidoreductase activity, acting on a sulfur group of donors, i…	K00392	sir; sulfite reductase (ferredoxin) [EC:1.8.7.1]	cann00920 Sulfur metabolism; cann01100 Metabolic pathways
Capana00g001096	62	0.420336	Down	0.00109614	K	"G3PC_PETHY Glyceraldehyde-3-phosphate dehydrogenase, cytosolic OS=Petunia hybrida GN=GAPC PE=2 SV=1"	GAPC	1	7.00654e-11	164.3	YDTVHGQWK(1)HHELK(1)VQDEK	3	4.1728	27	1.66338	1.91051	1.43134	1.77594	1.34787	1.34977	0.724708	0.713568	0.720484	0.621544	0.756383	0.725948	0.756991	0.806225	0.779981	0.666667	1.13689	1.05527	1.28036	0.548896		0.552281		0.665984	cytoplasm				K00134	GAPDH, gapA; glyceraldehyde 3-phosphate dehydrogenase [EC:1.2.1.12]	cann00010 Glycolysis / Gluconeogenesis; cann00710 Carbon fixation in photosynthetic organisms; cann01100 Metabolic pathways; cann01110 Biosynthesis of secondary metabolites; cann01200 Carbon metabolism; cann01230 Biosynthesis of amino acids	PF00044; PF02800	Glyceraldehyde 3-phosphate dehydrogenase, NAD binding domain; Glyceraldehyde 3-phosphate dehydrogenase, C-terminal domain
Capana00g001213	112	1.63446	Up	0.0061836	K	"PSBP_SOLLC Oxygen-evolving enhancer protein 2, chloroplastic OS=Solanum lycopersicum GN=PSBP PE=2 SV=1"	PSBP	1	0	326.21	WNPSK(1)EVEYPGQVLR	2	3.175	36	0.590361	0.571429	0.4561	0.595663	0.505828	0.651877	0.552466	0.897646	0.954686	0.942932	0.80354	0.897903	0.996942	0.730809	0.704637	1.13779	1.16996	1.02827	1.06702	0.923153	1.01802	1.6352	1.80109	1.95209	chloroplast		GO:0005622 intracellular; GO:0005623 cell; GO:0005737 cytoplasm; GO:0009507 chloroplast; GO:0009534 chloroplast thylakoid; GO:0009535 chloroplast thylakoid membrane; GO:0009536 plastid; GO:0009579 thylakoid; GO:0016020 membrane; GO:0031976 plastid thylakoid; GO:0031984 organelle subcompartment; GO:0034357 photosynthetic membrane; GO:0042651 thylakoid membrane; GO:0043226 organelle; GO:0043227 mem…		K02717	psbP; photosystem II oxygen-evolving enhancer protein 2	cann00195 Photosynthesis	PF01789	PsbP
Capana00g001503	345	0.541664	Down	0.000196475	K	RD21A_ARATH Cysteine proteinase RD21a OS=Arabidopsis thaliana GN=RD21A PE=1 SV=1	RD21A	1	9.68147e-18	145.08	NSWGK(1)SWGEHGYLK	2	-3.8438	23	1.50596	1.56472	1.57733	1.60275	1.60089		1.03369	0.879682	0.928817	0.792287	0.914603	0.810767	1.34471	1.41563	1.26635	0.902439	0.902985	0.774857	0.551905	0.778934	0.669323	0.594833	0.537196	0.628319	extracellular	GO:0006508 proteolysis; GO:0006807 nitrogen compound metabolic process; GO:0007275 multicellular organism development; GO:0008152 metabolic process; GO:0009056 catabolic process; GO:0009057 macromolecule catabolic process; GO:0009555 pollen development; GO:0009987 cellular process; GO:0019538 protein metabolic process; GO:0030163 protein catabolic process; GO:0032501 multicellular organismal proc…	GO:0000323 lytic vacuole; GO:0005576 extracellular region; GO:0005615 extracellular space; GO:0005622 intracellular; GO:0005623 cell; GO:0005737 cytoplasm; GO:0005764 lysosome; GO:0005773 vacuole; GO:0043226 organelle; GO:0043227 membrane-bounded organelle; GO:0043229 intracellular organelle; GO:0043231 intracellular membrane-bounded organelle; GO:0044421 extracellular region part; GO:0044424 int…	GO:0003824 catalytic activity; GO:0004175 endopeptidase activity; GO:0004197 cysteine-type endopeptidase activity; GO:0008233 peptidase activity; GO:0008234 cysteine-type peptidase activity; GO:0016787 hydrolase activity; GO:0070011 peptidase activity, acting on L-amino acid peptides;				PF08246; PF00112	Cathepsin propeptide inhibitor domain (I29); Papain family cysteine protease
Capana00g001712	479	0.572295	Down	9.9618e-05	K	PPR3_ARATH Pentatricopeptide repeat-containing protein At1g02150 OS=Arabidopsis thaliana GN=At1g02150 PE=2 SV=2	At1g02150	1	1.85699e-07	114.39	LCEQDEDTK(1)SK	2	-6.4991	13	1.14666	1.13501	1.17427	1.1948	0.982615				0.54028	0.662637	0.618545	0.696629		0.941176	1.13917	0.625123					0.758407				nucleus	GO:0006139 nucleobase-containing compound metabolic process; GO:0006725 cellular aromatic compound metabolic process; GO:0006807 nitrogen compound metabolic process; GO:0008152 metabolic process; GO:0009451 RNA modification; GO:0009987 cellular process; GO:0016070 RNA metabolic process; GO:0034641 cellular nitrogen compound metabolic process; GO:0043170 macromolecule metabolic process; GO:0043412…	GO:0005622 intracellular; GO:0005623 cell; GO:0005737 cytoplasm; GO:0009507 chloroplast; GO:0009536 plastid; GO:0043226 organelle; GO:0043227 membrane-bounded organelle; GO:0043229 intracellular organelle; GO:0043231 intracellular membrane-bounded organelle; GO:0044424 intracellular part; GO:0044444 cytoplasmic part; GO:0044464 cell part;	GO:0003676 nucleic acid binding; GO:0003723 RNA binding; GO:0003729 mRNA binding; GO:0003824 catalytic activity; GO:0004518 nuclease activity; GO:0004519 endonuclease activity; GO:0005488 binding; GO:0016787 hydrolase activity; GO:0016788 hydrolase activity, acting on ester bonds; GO:0097159 organic cyclic compound binding; GO:1901363 heterocyclic compound binding;
Capana00g001862	147	0.584176	Down	0.0134427	K	CYPH_SOLLC Peptidyl-prolyl cis-trans isomerase OS=Solanum lycopersicum GN=CYP PE=2 SV=1	CYP	1	1.08821e-53	155.57	HVVFGQVVEGFDVIK(1)K	2	0.68796	29	1.06419	1.53333	1.49264	1.32319	1.39065	1.36997	1.03202	1.08048	0.932331	0.735093	0.808797	0.845481	0.91704	1.15654	1.14091	1.03487	0.953488	0.911765	0.958678	0.968059	0.842926	0.561066	0.649242	0.564671	chloroplast	GO:0000413 protein peptidyl-prolyl isomerization; GO:0006464 cellular protein modification process; GO:0006807 nitrogen compound metabolic process; GO:0007154 cell communication; GO:0007165 signal transduction; GO:0008152 metabolic process; GO:0009987 cellular process; GO:0018193 peptidyl-amino acid modification; GO:0018208 peptidyl-proline modification; GO:0019538 protein metabolic process; GO:0…	GO:0005576 extracellular region; GO:0005622 intracellular; GO:0005623 cell; GO:0005737 cytoplasm; GO:0005773 vacuole; GO:0005774 vacuolar membrane; GO:0005794 Golgi apparatus; GO:0005829 cytosol; GO:0005886 plasma membrane; GO:0005911 cell-cell junction; GO:0009506 plasmodesma; GO:0009507 chloroplast; GO:0009536 plastid; GO:0012505 endomembrane system; GO:0016020 membrane; GO:0030054 cell junctio…	GO:0003755 peptidyl-prolyl cis-trans isomerase activity; GO:0003824 catalytic activity; GO:0005488 binding; GO:0008144 drug binding; GO:0016018 cyclosporin A binding; GO:0016853 isomerase activity; GO:0016859 cis-trans isomerase activity; GO:0033218 amide binding; GO:0042277 peptide binding;	K01802	E5.2.1.8; peptidylprolyl isomerase [EC:5.2.1.8]		PF00160	Cyclophilin type peptidyl-prolyl cis-trans isomerase/CLD
Capana00g001862	98	0.649835	Down	0.0080021	K	CYPH_SOLLC Peptidyl-prolyl cis-trans isomerase OS=Solanum lycopersicum GN=CYP PE=2 SV=1	CYP	1	0	287.14	K(1)HTGPGVLSMANAGPGTNGSQFFICTAK	3	0.88521	87	1.12372	1.1	1.26889	1.30976	1.38224	1.35567	0.972107	1.17751	1.07948	0.868035	0.667864	0.733722	1.45291	1.19259	1.20797	0.95258	0.978112	0.897698	0.766234	0.708845	0.760192	0.697261	0.748485	0.71323	chloroplast	GO:0000413 protein peptidyl-prolyl isomerization; GO:0006464 cellular protein modification process; GO:0006807 nitrogen compound metabolic process; GO:0007154 cell communication; GO:0007165 signal transduction; GO:0008152 metabolic process; GO:0009987 cellular process; GO:0018193 peptidyl-amino acid modification; GO:0018208 peptidyl-proline modification; GO:0019538 protein metabolic process; GO:0…	GO:0005576 extracellular region; GO:0005622 intracellular; GO:0005623 cell; GO:0005737 cytoplasm; GO:0005773 vacuole; GO:0005774 vacuolar membrane; GO:0005794 Golgi apparatus; GO:0005829 cytosol; GO:0005886 plasma membrane; GO:0005911 cell-cell junction; GO:0009506 plasmodesma; GO:0009507 chloroplast; GO:0009536 plastid; GO:0012505 endomembrane system; GO:0016020 membrane; GO:0030054 cell junctio…	GO:0003755 peptidyl-prolyl cis-trans isomerase activity; GO:0003824 catalytic activity; GO:0005488 binding; GO:0008144 drug binding; GO:0016018 cyclosporin A binding; GO:0016853 isomerase activity; GO:0016859 cis-trans isomerase activity; GO:0033218 amide binding; GO:0042277 peptide binding;	K01802	E5.2.1.8; peptidylprolyl isomerase [EC:5.2.1.8]		PF00160	Cyclophilin type peptidyl-prolyl cis-trans isomerase/CLD
Capana00g002731	337	0.543681	Down	0.00132079	K	"6PGD_SYNE7 6-phosphogluconate dehydrogenase, decarboxylating OS=Synechococcus elongatus (strain PCC 7942) GN=gnd PE=1 SV=4"	gnd	1	5.23218e-68	229.44	VFK(1)SCGVSDILVEQSVDKK	3	-7.4669	21	1.17753	1.25841	1.26912	1.52603	1.63024	1.63738	0.937439	0.756422	0.770642	0.619565	0.772778	0.62203	1.13842	1.10994	1.21715	0.58941	0.653668	0.574144	0.610827		0.605042		0.456215		chloroplast	GO:0000003 reproduction; GO:0001101 response to acid chemical; GO:0006950 response to stress; GO:0006970 response to osmotic stress; GO:0008037 cell recognition; GO:0008152 metabolic process; GO:0009266 response to temperature stimulus; GO:0009409 response to cold; GO:0009414 response to water deprivation; GO:0009415 response to water; GO:0009566 fertilization; GO:0009567 double fertilization for…	GO:0005622 intracellular; GO:0005623 cell; GO:0005737 cytoplasm; GO:0005777 peroxisome; GO:0005829 cytosol; GO:0009507 chloroplast; GO:0009532 plastid stroma; GO:0009536 plastid; GO:0009570 chloroplast stroma; GO:0019822 P4 peroxisome; GO:0042579 microbody; GO:0043226 organelle; GO:0043227 membrane-bounded organelle; GO:0043229 intracellular organelle; GO:0043231 intracellular membrane-bounded or…	GO:0003824 catalytic activity; GO:0004616 phosphogluconate dehydrogenase (decarboxylating) activity; GO:0016491 oxidoreductase activity; GO:0016614 oxidoreductase activity, acting on CH-OH group of donors; GO:0016616 oxidoreductase activity, acting on the CH-OH group of donors, NAD or NADP as acceptor;	K00033	PGD, gnd, gntZ; 6-phosphogluconate dehydrogenase [EC:1.1.1.44 1.1.1.343]	cann00030 Pentose phosphate pathway; cann00480 Glutathione metabolism; cann01100 Metabolic pathways; cann01110 Biosynthesis of secondary metabolites; cann01200 Carbon metabolism	PF03446; PF00393	NAD binding domain of 6-phosphogluconate dehydrogenase; 6-phosphogluconate dehydrogenase, C-terminal domain
Capana00g003043	65	1.64699	Up	0.045595	K	"CYSZ_CUCMA Citrate synthase, glyoxysomal OS=Cucurbita maxima PE=1 SV=1"	---	1	0.00100299	94.791	K(1)YPVQVSEEGTIK	2	-8.5093	14	0.75	0.733902		0.874598	0.893878			0.996618	1.20642	1.15349	1.01655	1.49592		1.17423		1.03901			0.972509	0.951913			1.3196		chloroplast	GO:0006082 organic acid metabolic process; GO:0006629 lipid metabolic process; GO:0006631 fatty acid metabolic process; GO:0006635 fatty acid beta-oxidation; GO:0008152 metabolic process; GO:0009056 catabolic process; GO:0009062 fatty acid catabolic process; GO:0009987 cellular process; GO:0016042 lipid catabolic process; GO:0016054 organic acid catabolic process; GO:0019395 fatty acid oxidation;…	GO:0005622 intracellular; GO:0005623 cell; GO:0005737 cytoplasm; GO:0005777 peroxisome; GO:0005911 cell-cell junction; GO:0009506 plasmodesma; GO:0009514 glyoxysome; GO:0030054 cell junction; GO:0042579 microbody; GO:0043226 organelle; GO:0043227 membrane-bounded organelle; GO:0043229 intracellular organelle; GO:0043231 intracellular membrane-bounded organelle; GO:0044424 intracellular part; GO:0…	GO:0003824 catalytic activity; GO:0004108 citrate (Si)-synthase activity; GO:0016740 transferase activity; GO:0016746 transferase activity, transferring acyl groups; GO:0036440 citrate synthase activity; GO:0046912 transferase activity, transferring acyl groups, acyl groups converted into alkyl on transfer;	K01647	CS, gltA; citrate synthase [EC:2.3.3.1]	cann00020 Citrate cycle (TCA cycle); cann00630 Glyoxylate and dicarboxylate metabolism; cann01100 Metabolic pathways; cann01110 Biosynthesis of secondary metabolites; cann01200 Carbon metabolism; cann01210 2-Oxocarboxylic acid metabolism; cann01230 Biosynthesis of amino acids	PF00285	Citrate synthase
Capana00g003547	100	0.641446	Down	0.00034442	K	NECP1_HUMAN Adaptin ear-binding coat-associated protein 1 OS=Homo sapiens GN=NECAP1 PE=1 SV=2	NECAP1	1	2.26727e-07	124.69	ERPEAYDFQAALHDHQK(1)YLNK	4	-8.5616	24	1.18652	1.30496	1.20729	0.985685	1.05465	0.901865	1.43196	1.20231	1.42452	0.793578	0.753832	0.825153	1.07426	1.15651	1.01702	0.926876	0.839749	0.818833	1.05272	0.908526	1.02524	0.749538	0.882519	0.811992	nucleus	GO:0006810 transport; GO:0051179 localization; GO:0051234 establishment of localization; GO:0055085 transmembrane transport;		GO:0003824 catalytic activity; GO:0005215 transporter activity; GO:0015399 primary active transmembrane transporter activity; GO:0015405 P-P-bond-hydrolysis-driven transmembrane transporter activity; GO:0016462 pyrophosphatase activity; GO:0016787 hydrolase activity; GO:0016817 hydrolase activity, acting on acid anhydrides; GO:0016818 hydrolase activity, acting on acid anhydrides, in phosphorus-c…	K20069	NECAP1_2; adaptin ear-binding coat-associated protein 1/2
Capana00g004152	409	0.647446	Down	0.031815	K	PME22_SOLLC Pectinesterase 2.2 OS=Solanum lycopersicum GN=PME2.2 PE=3 SV=1	PME2.2	1	1.18962e-07	146.88	NQK(1)NMVTAQGR	2	-7.1926	15	1.37763		1.17733	1.14303	1.52994			0.938002	0.966157	0.833013		0.821186	1.08801	1.16062			0.928983		1.08647	1.044	0.951648				chloroplast	GO:0009605 response to external stimulus; GO:0009607 response to biotic stimulus; GO:0009617 response to bacterium; GO:0043086 negative regulation of catalytic activity; GO:0043207 response to external biotic stimulus; GO:0044092 negative regulation of molecular function; GO:0050790 regulation of catalytic activity; GO:0050896 response to stimulus; GO:0051704 multi-organism process; GO:0051707 re…	GO:0005618 cell wall; GO:0005622 intracellular; GO:0005623 cell; GO:0005737 cytoplasm; GO:0005773 vacuole; GO:0005774 vacuolar membrane; GO:0005829 cytosol; GO:0016020 membrane; GO:0030312 external encapsulating structure; GO:0031090 organelle membrane; GO:0043226 organelle; GO:0043227 membrane-bounded organelle; GO:0043229 intracellular organelle; GO:0043231 intracellular membrane-bounded organe…	GO:0003824 catalytic activity; GO:0004857 enzyme inhibitor activity; GO:0016787 hydrolase activity; GO:0016788 hydrolase activity, acting on ester bonds; GO:0030234 enzyme regulator activity; GO:0030599 pectinesterase activity; GO:0046910 pectinesterase inhibitor activity; GO:0052689 carboxylic ester hydrolase activity; GO:0098772 molecular function regulator;	K01051	E3.1.1.11; pectinesterase [EC:3.1.1.11]	cann00040 Pentose and glucuronate interconversions; cann01100 Metabolic pathways	PF04043	Plant invertase/pectin methylesterase inhibitor
[truncated: 3,204 more rows]
