# Supplementary material for: Comprehensive Proteome and Lysine Acetylome Analysis Reveals the Widespread Involvement of Acetylation in Cold Resistance of Pepper (Capsicum annuum L.)
Source: Front Plant Sci. 2021 Aug 27;12:730489. doi: 10.3389/fpls.2021.730489 (PMC8429487; doi:10.3389/fpls.2021.730489)
Supplement: Supplementary Table 6 — A list of co-identified proteins in proteome and acetylome. [file Table_6.XLSX]

## Sheet: Common
Table S6. List of co-identified proteins in Proteome and acetylome
Protein accession	Protein description	Gene name	Subcellular localization	Biological Process	Cellular Component	Molecular Function	KEGG KO No.	KEGG Gene	KEGG pathway	Pfam ID	Domain description	KOG category	KOG NO.	KOG description
Capana00g000308	IF4E2_WHEAT Eukaryotic translation initiation factor 4E-2 OS=Triticum aestivum PE=1 SV=1	---	plasma membrane	GO:0002682 regulation of immune system process; GO:0002683 negative regulation of immune system process; GO:0002697 regulation of immune effector process; GO:0002698 negative regulation of immune effector process; GO:0002831 regulation of response to biotic stimulus; GO:0002832 negative regulation of response to biotic stimulus; GO:0006412 translation; GO:0006413 translational initiation; GO:0006…	GO:0005622 intracellular; GO:0005623 cell; GO:0005634 nucleus; GO:0005737 cytoplasm; GO:0005829 cytosol; GO:0005845 mRNA cap binding complex; GO:0032991 macromolecular complex; GO:0034518 RNA cap binding complex; GO:0043226 organelle; GO:0043227 membrane-bounded organelle; GO:0043229 intracellular organelle; GO:0043231 intracellular membrane-bounded organelle; GO:0044424 intracellular part; GO:00…	GO:0000339 RNA cap binding; GO:0000340 RNA 7-methylguanosine cap binding; GO:0003676 nucleic acid binding; GO:0003723 RNA binding; GO:0003743 translation initiation factor activity; GO:0005488 binding; GO:0008135 translation factor activity, RNA binding; GO:0097159 organic cyclic compound binding; GO:1901363 heterocyclic compound binding;	K03259	EIF4E; translation initiation factor 4E	cann03013 RNA transport	PF01652	Eukaryotic initiation factor 4E	J	KOG1670	Translation initiation factor 4F, cap-binding subunit (eIF-4E) and related cap-binding proteins
Capana00g000314	NIT2_HUMAN Omega-amidase NIT2 OS=Homo sapiens GN=NIT2 PE=1 SV=1	NIT2	chloroplast	GO:0006082 organic acid metabolic process; GO:0006107 oxaloacetate metabolic process; GO:0006108 malate metabolic process; GO:0008152 metabolic process; GO:0009987 cellular process; GO:0019752 carboxylic acid metabolic process; GO:0043436 oxoacid metabolic process; GO:0043648 dicarboxylic acid metabolic process; GO:0044237 cellular metabolic process; GO:0044281 small molecule metabolic process; G…	GO:0005622 intracellular; GO:0005623 cell; GO:0005737 cytoplasm; GO:0005829 cytosol; GO:0009507 chloroplast; GO:0009532 plastid stroma; GO:0009536 plastid; GO:0009570 chloroplast stroma; GO:0043226 organelle; GO:0043227 membrane-bounded organelle; GO:0043229 intracellular organelle; GO:0043231 intracellular membrane-bounded organelle; GO:0044422 organelle part; GO:0044424 intracellular part; GO:0…	GO:0003824 catalytic activity; GO:0005488 binding; GO:0008270 zinc ion binding; GO:0016787 hydrolase activity; GO:0016810 hydrolase activity, acting on carbon-nitrogen (but not peptide) bonds; GO:0016811 hydrolase activity, acting on carbon-nitrogen (but not peptide) bonds, in linear amides; GO:0043167 ion binding; GO:0043169 cation binding; GO:0046872 metal ion binding; GO:0046914 transition met…	K13566	NIT2; omega-amidase [EC:3.5.1.3]	cann00250 Alanine, aspartate and glutamate metabolism; cann01100 Metabolic pathways			E	KOG0806	Carbon-nitrogen hydrolase
Capana00g000428	H2A_PETCR Histone H2A OS=Petroselinum crispum PE=2 SV=1	---	nucleus		GO:0005622 intracellular; GO:0005623 cell; GO:0005634 nucleus; GO:0005694 chromosome; GO:0043226 organelle; GO:0043227 membrane-bounded organelle; GO:0043228 non-membrane-bounded organelle; GO:0043229 intracellular organelle; GO:0043231 intracellular membrane-bounded organelle; GO:0043232 intracellular non-membrane-bounded organelle; GO:0044424 intracellular part; GO:0044464 cell part;		K11251	H2A; histone H2A		PF00125	Core histone H2A/H2B/H3/H4	B	KOG1756	Histone 2A
Capana00g000453	"GCSH_FLAAN Glycine cleavage system H protein, mitochondrial OS=Flaveria anomala GN=GDCSH PE=2 SV=1"	GDCSH	cytoplasm		GO:0005622 intracellular; GO:0005623 cell; GO:0005634 nucleus; GO:0005737 cytoplasm; GO:0005739 mitochondrion; GO:0009507 chloroplast; GO:0009536 plastid; GO:0009579 thylakoid; GO:0043226 organelle; GO:0043227 membrane-bounded organelle; GO:0043229 intracellular organelle; GO:0043231 intracellular membrane-bounded organelle; GO:0044424 intracellular part; GO:0044444 cytoplasmic part; GO:0044464 c…		K02437	gcvH, GCSH; glycine cleavage system H protein	cann00260 Glycine, serine and threonine metabolism; cann00630 Glyoxylate and dicarboxylate metabolism; cann01100 Metabolic pathways; cann01110 Biosynthesis of secondary metabolites; cann01200 Carbon metabolism	PF01597	Glycine cleavage H-protein	E	KOG3373	Glycine cleavage system H protein (lipoate-binding)
Capana00g000465	OLP1_SOLLC Osmotin-like protein OS=Solanum lycopersicum PE=1 SV=1	---	chloroplast							PF00314	Thaumatin family	O	KOG0800	FOG: Predicted E3 ubiquitin ligase
Capana00g000559	VATE_CITLI V-type proton ATPase subunit E OS=Citrus limon GN=VATE PE=2 SV=1	VATE	cytoplasm	GO:0000003 reproduction; GO:0003006 developmental process involved in reproduction; GO:0006810 transport; GO:0006811 ion transport; GO:0006812 cation transport; GO:0006950 response to stress; GO:0006952 defense response; GO:0006970 response to osmotic stress; GO:0006996 organelle organization; GO:0007030 Golgi organization; GO:0007275 multicellular organism development; GO:0009266 response to tem…	GO:0000325 plant-type vacuole; GO:0005622 intracellular; GO:0005623 cell; GO:0005737 cytoplasm; GO:0005773 vacuole; GO:0005774 vacuolar membrane; GO:0005794 Golgi apparatus; GO:0005829 cytosol; GO:0005840 ribosome; GO:0005844 polysome; GO:0009705 plant-type vacuole membrane; GO:0012505 endomembrane system; GO:0016020 membrane; GO:0022626 cytosolic ribosome; GO:0031090 organelle membrane; GO:00329…	GO:0003735 structural constituent of ribosome; GO:0003824 catalytic activity; GO:0005198 structural molecule activity; GO:0005215 transporter activity; GO:0008324 cation transmembrane transporter activity; GO:0015075 ion transmembrane transporter activity; GO:0015077 monovalent inorganic cation transmembrane transporter activity; GO:0015078 hydrogen ion transmembrane transporter activity; GO:0015…	K02150	ATPeV1E, ATP6E; V-type H+-transporting ATPase subunit E	cann00190 Oxidative phosphorylation; cann01100 Metabolic pathways; cann04145 Phagosome			C	KOG1664	Vacuolar H+-ATPase V1 sector, subunit E
Capana00g000606	"ODO1_DICDI 2-oxoglutarate dehydrogenase, mitochondrial OS=Dictyostelium discoideum GN=ogdh PE=3 SV=1"	ogdh	cytoplasm	GO:0006082 organic acid metabolic process; GO:0006091 generation of precursor metabolites and energy; GO:0006099 tricarboxylic acid cycle; GO:0006101 citrate metabolic process; GO:0008152 metabolic process; GO:0009060 aerobic respiration; GO:0009987 cellular process; GO:0015980 energy derivation by oxidation of organic compounds; GO:0016999 antibiotic metabolic process; GO:0017144 drug metabolic …	GO:0005622 intracellular; GO:0005623 cell; GO:0005737 cytoplasm; GO:0005739 mitochondrion; GO:0005759 mitochondrial matrix; GO:0005947 mitochondrial alpha-ketoglutarate dehydrogenase complex; GO:0009353 mitochondrial oxoglutarate dehydrogenase complex; GO:0030062 mitochondrial tricarboxylic acid cycle enzyme complex; GO:0031974 membrane-enclosed lumen; GO:0032991 macromolecular complex; GO:004322…	GO:0003824 catalytic activity; GO:0004591 oxoglutarate dehydrogenase (succinyl-transferring) activity; GO:0016491 oxidoreductase activity; GO:0016624 oxidoreductase activity, acting on the aldehyde or oxo group of donors, disulfide as acceptor; GO:0016903 oxidoreductase activity, acting on the aldehyde or oxo group of donors;	K00164	OGDH, sucA; 2-oxoglutarate dehydrogenase E1 component [EC:1.2.4.2]	cann00020 Citrate cycle (TCA cycle); cann01100 Metabolic pathways; cann01110 Biosynthesis of secondary metabolites; cann01200 Carbon metabolism	PF02779	Transketolase, pyrimidine binding domain	C	KOG0450	2-oxoglutarate dehydrogenase, E1 subunit
Capana00g000627	"QORH_ARATH Putative quinone-oxidoreductase homolog, chloroplastic OS=Arabidopsis thaliana GN=At4g13010 PE=2 SV=1"	At4g13010	cytoplasm		GO:0005622 intracellular; GO:0005623 cell; GO:0005737 cytoplasm; GO:0005773 vacuole; GO:0005886 plasma membrane; GO:0009507 chloroplast; GO:0009526 plastid envelope; GO:0009534 chloroplast thylakoid; GO:0009535 chloroplast thylakoid membrane; GO:0009536 plastid; GO:0009579 thylakoid; GO:0009941 chloroplast envelope; GO:0016020 membrane; GO:0031967 organelle envelope; GO:0031975 envelope; GO:00319…		K00224	cann00592 alpha-Linolenic acid metabolism; cann01110 Biosynthesis of secondary metabolites		PF08240; PF13602	Alcohol dehydrogenase GroES-like domain; Zinc-binding dehydrogenase	C	KOG1198	Zinc-binding oxidoreductase
Capana00g000816	AP1M1_HUMAN AP-1 complex subunit mu-1 OS=Homo sapiens GN=AP1M1 PE=1 SV=3	AP1M1	chloroplast				K12393	AP1M; AP-1 complex subunit mu		PF01217	Clathrin adaptor complex small chain	U	KOG0937	Adaptor complexes medium subunit family
Capana00g000843	REFP2_MOUSE RNA and export factor-binding protein 2 OS=Mus musculus GN=Refbp2 PE=1 SV=1	Refbp2	chloroplast				K12881	THOC4, ALY; THO complex subunit 4	cann03013 RNA transport; cann03015 mRNA surveillance pathway; cann03040 Spliceosome	PF00076	RNA recognition motif. (a.k.a. RRM, RBD, or RNP domain)	A	KOG0533	RRM motif-containing protein
Capana00g000867	GDL46_ARATH GDSL esterase/lipase At2g38180 OS=Arabidopsis thaliana GN=At2g38180 PE=2 SV=1	At2g38180	chloroplast							PF13472	GDSL-like Lipase/Acylhydrolase family	I	KOG3035	Isoamyl acetate-hydrolyzing esterase
Capana00g000871	PSB6_TOBAC Proteasome subunit beta type-6 OS=Nicotiana tabacum PE=2 SV=1	---	cytoplasm				K02738	PSMB6; 20S proteasome subunit beta 1 [EC:3.4.25.1]	cann03050 Proteasome	PF00227	Proteasome subunit	O	KOG0174	20S proteasome, regulatory subunit beta type PSMB6/PSMB9/PRE3
Capana00g000875	"GLGB2_ARATH 1,4-alpha-glucan-branching enzyme 2-2, chloroplastic/amyloplastic OS=Arabidopsis thaliana GN=SBE2.2 PE=1 SV=1"	SBE2.2	nucleus	GO:0001678 cellular glucose homeostasis; GO:0005975 carbohydrate metabolic process; GO:0005976 polysaccharide metabolic process; GO:0005982 starch metabolic process; GO:0006073 cellular glucan metabolic process; GO:0008152 metabolic process; GO:0009058 biosynthetic process; GO:0009059 macromolecule biosynthetic process; GO:0009314 response to radiation; GO:0009416 response to light stimulus; GO:0…	GO:0005622 intracellular; GO:0005623 cell; GO:0005737 cytoplasm; GO:0009507 chloroplast; GO:0009532 plastid stroma; GO:0009536 plastid; GO:0009570 chloroplast stroma; GO:0043226 organelle; GO:0043227 membrane-bounded organelle; GO:0043229 intracellular organelle; GO:0043231 intracellular membrane-bounded organelle; GO:0044422 organelle part; GO:0044424 intracellular part; GO:0044434 chloroplast p…	GO:0003824 catalytic activity; GO:0003844 1,4-alpha-glucan branching enzyme activity; GO:0016740 transferase activity; GO:0016757 transferase activity, transferring glycosyl groups; GO:0016758 transferase activity, transferring hexosyl groups;	K00700	GBE1, glgB; 1,4-alpha-glucan branching enzyme [EC:2.4.1.18]	cann00500 Starch and sucrose metabolism; cann01100 Metabolic pathways; cann01110 Biosynthesis of secondary metabolites	PF02922; PF00128	Carbohydrate-binding module 48 (Isoamylase N-terminal domain); Alpha amylase, catalytic domain	G	KOG0470	1,4-alpha-glucan branching enzyme/starch branching enzyme II
Capana00g000900	"ADT1_SOLTU ADP,ATP carrier protein, mitochondrial OS=Solanum tuberosum GN=ANT PE=2 SV=1"	ANT	chloroplast		GO:0005622 intracellular; GO:0005623 cell; GO:0005737 cytoplasm; GO:0005739 mitochondrion; GO:0005740 mitochondrial envelope; GO:0005743 mitochondrial inner membrane; GO:0016020 membrane; GO:0019866 organelle inner membrane; GO:0031090 organelle membrane; GO:0031966 mitochondrial membrane; GO:0031967 organelle envelope; GO:0031975 envelope; GO:0043226 organelle; GO:0043227 membrane-bounded organe…		K05863	SLC25A4S, ANT; solute carrier family 25 (mitochondrial adenine nucleotide translocator), member 4/5/6/31				C	KOG0749	Mitochondrial ADP/ATP carrier proteins
Capana00g001018	SIR_SYNY3 Sulfite reductase [ferredoxin] OS=Synechocystis sp. (strain PCC 6803 / Kazusa) GN=sir PE=1 SV=1	sir	cytoplasm	GO:0006275 regulation of DNA replication; GO:0006323 DNA packaging; GO:0006355 regulation of transcription, DNA-templated; GO:0006790 sulfur compound metabolic process; GO:0006950 response to stress; GO:0006970 response to osmotic stress; GO:0006996 organelle organization; GO:0008152 metabolic process; GO:0009266 response to temperature stimulus; GO:0009409 response to cold; GO:0009628 response t…	GO:0005576 extracellular region; GO:0005622 intracellular; GO:0005623 cell; GO:0005737 cytoplasm; GO:0009295 nucleoid; GO:0009507 chloroplast; GO:0009526 plastid envelope; GO:0009532 plastid stroma; GO:0009536 plastid; GO:0009570 chloroplast stroma; GO:0009941 chloroplast envelope; GO:0010319 stromule; GO:0016020 membrane; GO:0031967 organelle envelope; GO:0031975 envelope; GO:0042644 chloroplast…	GO:0003676 nucleic acid binding; GO:0003677 DNA binding; GO:0003690 double-stranded DNA binding; GO:0003824 catalytic activity; GO:0005488 binding; GO:0005507 copper ion binding; GO:0016002 sulfite reductase activity; GO:0016491 oxidoreductase activity; GO:0016667 oxidoreductase activity, acting on a sulfur group of donors; GO:0016673 oxidoreductase activity, acting on a sulfur group of donors, i…	K00392	sir; sulfite reductase (ferredoxin) [EC:1.8.7.1]	cann00920 Sulfur metabolism; cann01100 Metabolic pathways			P	KOG0560	Sulfite reductase (ferredoxin)
Capana00g001032	Usp domain-containing protein	---	cytoplasm							PF00582	Universal stress protein family
Capana00g001096	"G3PC_PETHY Glyceraldehyde-3-phosphate dehydrogenase, cytosolic OS=Petunia hybrida GN=GAPC PE=2 SV=1"	GAPC	cytoplasm				K00134	GAPDH, gapA; glyceraldehyde 3-phosphate dehydrogenase [EC:1.2.1.12]	cann00010 Glycolysis / Gluconeogenesis; cann00710 Carbon fixation in photosynthetic organisms; cann01100 Metabolic pathways; cann01110 Biosynthesis of secondary metabolites; cann01200 Carbon metabolism; cann01230 Biosynthesis of amino acids	PF00044; PF02800	Glyceraldehyde 3-phosphate dehydrogenase, NAD binding domain; Glyceraldehyde 3-phosphate dehydrogenase, C-terminal domain	G	KOG0657	Glyceraldehyde 3-phosphate dehydrogenase
Capana00g001154	PSBB_TOBAC Photosystem II CP47 chlorophyll apoprotein OS=Nicotiana tabacum GN=psbB PE=3 SV=1	psbB	plasma membrane	GO:0006091 generation of precursor metabolites and energy; GO:0008152 metabolic process; GO:0009987 cellular process; GO:0010207 photosystem II assembly; GO:0015979 photosynthesis; GO:0016043 cellular component organization; GO:0019684 photosynthesis, light reaction; GO:0022607 cellular component assembly; GO:0034622 cellular macromolecular complex assembly; GO:0043933 macromolecular complex subu…	GO:0005622 intracellular; GO:0005623 cell; GO:0005737 cytoplasm; GO:0009507 chloroplast; GO:0009532 plastid stroma; GO:0009534 chloroplast thylakoid; GO:0009535 chloroplast thylakoid membrane; GO:0009536 plastid; GO:0009570 chloroplast stroma; GO:0009579 thylakoid; GO:0010287 plastoglobule; GO:0016020 membrane; GO:0031976 plastid thylakoid; GO:0031984 organelle subcompartment; GO:0034357 photosyn…		K02704	psbB; photosystem II CP47 chlorophyll apoprotein	cann00195 Photosynthesis; cann01100 Metabolic pathways
Capana00g001213	"PSBP_SOLLC Oxygen-evolving enhancer protein 2, chloroplastic OS=Solanum lycopersicum GN=PSBP PE=2 SV=1"	PSBP	chloroplast		GO:0005622 intracellular; GO:0005623 cell; GO:0005737 cytoplasm; GO:0009507 chloroplast; GO:0009534 chloroplast thylakoid; GO:0009535 chloroplast thylakoid membrane; GO:0009536 plastid; GO:0009579 thylakoid; GO:0016020 membrane; GO:0031976 plastid thylakoid; GO:0031984 organelle subcompartment; GO:0034357 photosynthetic membrane; GO:0042651 thylakoid membrane; GO:0043226 organelle; GO:0043227 mem…		K02717	psbP; photosystem II oxygen-evolving enhancer protein 2	cann00195 Photosynthesis	PF01789	PsbP
Capana00g001216	WIT2_ARATH WPP domain-interacting tail-anchored protein 2 OS=Arabidopsis thaliana GN=WIT2 PE=1 SV=1	WIT2	nucleus				K20283	GOLGA4; golgin subfamily A member 4
Capana00g001263	"RK27_TOBAC 50S ribosomal protein L27, chloroplastic OS=Nicotiana tabacum GN=RPL27 PE=1 SV=1"	RPL27	chloroplast	GO:0009719 response to endogenous stimulus; GO:0009725 response to hormone; GO:0009735 response to cytokinin; GO:0010033 response to organic substance; GO:0042221 response to chemical; GO:0050896 response to stimulus;	GO:0005622 intracellular; GO:0005623 cell; GO:0005737 cytoplasm; GO:0009507 chloroplast; GO:0009526 plastid envelope; GO:0009532 plastid stroma; GO:0009536 plastid; GO:0009570 chloroplast stroma; GO:0009579 thylakoid; GO:0009941 chloroplast envelope; GO:0031967 organelle envelope; GO:0031975 envelope; GO:0043226 organelle; GO:0043227 membrane-bounded organelle; GO:0043229 intracellular organelle;…	GO:0003735 structural constituent of ribosome; GO:0005198 structural molecule activity;	K02899	RP-L27, MRPL27, rpmA; large subunit ribosomal protein L27	cann03010 Ribosome			J	KOG4600	Mitochondrial ribosomal protein MRP7 (L2)
Capana00g001306	GLMM_THEPX Phosphoglucosamine mutase OS=Thermoanaerobacter sp. (strain X514) GN=glmM PE=3 SV=1	glmM	chloroplast	GO:0005975 carbohydrate metabolic process; GO:0008152 metabolic process; GO:0044238 primary metabolic process; GO:0071704 organic substance metabolic process;		GO:0003824 catalytic activity; GO:0004615 phosphomannomutase activity; GO:0016853 isomerase activity; GO:0016866 intramolecular transferase activity; GO:0016868 intramolecular transferase activity, phosphotransferases;				PF02878	Phosphoglucomutase/phosphomannomutase, alpha/beta/alpha domain I	G	KOG1220	Phosphoglucomutase/phosphomannomutase
Capana00g001358	VOC domain-containing protein	---	cytoplasm				K08234	yaeR; glyoxylase I family protein		PF00903	Glyoxalase/Bleomycin resistance protein/Dioxygenase superfamily
Capana00g001365	"CAS_ARATH Calcium sensing receptor, chloroplastic OS=Arabidopsis thaliana GN=CAS PE=1 SV=1"	CAS	chloroplast	GO:0007275 multicellular organism development; GO:0009314 response to radiation; GO:0009416 response to light stimulus; GO:0009628 response to abiotic stimulus; GO:0009639 response to red or far red light; GO:0009640 photomorphogenesis; GO:0009704 de-etiolation; GO:0009791 post-embryonic development; GO:0009987 cellular process; GO:0010035 response to inorganic substance; GO:0010038 response to m…	GO:0005622 intracellular; GO:0005623 cell; GO:0005737 cytoplasm; GO:0005739 mitochondrion; GO:0009507 chloroplast; GO:0009534 chloroplast thylakoid; GO:0009535 chloroplast thylakoid membrane; GO:0009536 plastid; GO:0009579 thylakoid; GO:0016020 membrane; GO:0031976 plastid thylakoid; GO:0031984 organelle subcompartment; GO:0034357 photosynthetic membrane; GO:0042651 thylakoid membrane; GO:0043226…
Capana00g001388	"COQ9_XENTR Ubiquinone biosynthesis protein COQ9, mitochondrial OS=Xenopus tropicalis GN=coq9 PE=2 SV=1"	coq9	mitochondria				K18587	COQ9; ubiquinone biosynthesis protein COQ9		PF08511	COQ9	S	KOG2969	Uncharacterized conserved protein
Capana00g001433	RBL_LAVLA Ribulose bisphosphate carboxylase large chain (Fragment) OS=Lavandula lanata GN=rbcL PE=3 SV=1	rbcL	cytoplasm	GO:0001101 response to acid chemical; GO:0009719 response to endogenous stimulus; GO:0009725 response to hormone; GO:0009737 response to abscisic acid; GO:0010033 response to organic substance; GO:0010035 response to inorganic substance; GO:0010038 response to metal ion; GO:0033993 response to lipid; GO:0042221 response to chemical; GO:0046686 response to cadmium ion; GO:0050896 response to stimu…	GO:0000312 plastid small ribosomal subunit; GO:0000313 organellar ribosome; GO:0000314 organellar small ribosomal subunit; GO:0005576 extracellular region; GO:0005618 cell wall; GO:0005622 intracellular; GO:0005623 cell; GO:0005737 cytoplasm; GO:0005829 cytosol; GO:0005840 ribosome; GO:0009507 chloroplast; GO:0009526 plastid envelope; GO:0009532 plastid stroma; GO:0009534 chloroplast thylakoid; G…		K01601	rbcL; ribulose-bisphosphate carboxylase large chain [EC:4.1.1.39]	cann00630 Glyoxylate and dicarboxylate metabolism; cann00710 Carbon fixation in photosynthetic organisms; cann01100 Metabolic pathways; cann01110 Biosynthesis of secondary metabolites; cann01200 Carbon metabolism	PF02788	Ribulose bisphosphate carboxylase large chain, N-terminal domain
Capana00g001441	NCS_THLFG S-norcoclaurine synthase OS=Thalictrum flavum subsp. glaucum PE=1 SV=1	---	extracellular							PF00407	Pathogenesis-related protein Bet v I family
Capana00g001453	"RK22_NICTO 50S ribosomal protein L22, chloroplastic OS=Nicotiana tomentosiformis GN=rpl22 PE=3 SV=1"	rpl22	nucleus	GO:0002181 cytoplasmic translation; GO:0006412 translation; GO:0006518 peptide metabolic process; GO:0006807 nitrogen compound metabolic process; GO:0008152 metabolic process; GO:0009058 biosynthetic process; GO:0009059 macromolecule biosynthetic process; GO:0009987 cellular process; GO:0010467 gene expression; GO:0019538 protein metabolic process; GO:0034641 cellular nitrogen compound metabolic …	GO:0000313 organellar ribosome; GO:0000315 organellar large ribosomal subunit; GO:0005622 intracellular; GO:0005623 cell; GO:0005737 cytoplasm; GO:0005739 mitochondrion; GO:0005759 mitochondrial matrix; GO:0005761 mitochondrial ribosome; GO:0005762 mitochondrial large ribosomal subunit; GO:0005829 cytosol; GO:0005840 ribosome; GO:0009507 chloroplast; GO:0009536 plastid; GO:0015934 large ribosomal…	GO:0003735 structural constituent of ribosome; GO:0005198 structural molecule activity;	K02890	RP-L22, MRPL22, rplV; large subunit ribosomal protein L22	cann03010 Ribosome	PF00237	Ribosomal protein L22p/L17e	J	KOG1711	Mitochondrial/chloroplast ribosomal protein L22
Capana00g001461	"CYSKP_CAPAN Cysteine synthase, chloroplastic/chromoplastic OS=Capsicum annuum PE=2 SV=1"	---	chloroplast	GO:0000003 reproduction; GO:0000096 sulfur amino acid metabolic process; GO:0000097 sulfur amino acid biosynthetic process; GO:0000902 cell morphogenesis; GO:0000904 cell morphogenesis involved in differentiation; GO:0003006 developmental process involved in reproduction; GO:0006082 organic acid metabolic process; GO:0006520 cellular amino acid metabolic process; GO:0006534 cysteine metabolic pro…	GO:0005576 extracellular region; GO:0005622 intracellular; GO:0005623 cell; GO:0005737 cytoplasm; GO:0005739 mitochondrion; GO:0005768 endosome; GO:0005794 Golgi apparatus; GO:0005802 trans-Golgi network; GO:0009507 chloroplast; GO:0009509 chromoplast; GO:0009526 plastid envelope; GO:0009532 plastid stroma; GO:0009536 plastid; GO:0009570 chloroplast stroma; GO:0009941 chloroplast envelope; GO:001…	GO:0003824 catalytic activity; GO:0004124 cysteine synthase activity; GO:0005488 binding; GO:0005515 protein binding; GO:0008144 drug binding; GO:0016740 transferase activity; GO:0016765 transferase activity, transferring alkyl or aryl (other than methyl) groups; GO:0019842 vitamin binding; GO:0030170 pyridoxal phosphate binding; GO:0036094 small molecule binding; GO:0042802 identical protein bin…	K01738	cysK; cysteine synthase A [EC:2.5.1.47]	cann00270 Cysteine and methionine metabolism; cann00920 Sulfur metabolism; cann01100 Metabolic pathways; cann01110 Biosynthesis of secondary metabolites; cann01200 Carbon metabolism; cann01230 Biosynthesis of amino acids			E	KOG1252	Cystathionine beta-synthase and related enzymes
Capana00g001503	RD21A_ARATH Cysteine proteinase RD21a OS=Arabidopsis thaliana GN=RD21A PE=1 SV=1	RD21A	extracellular	GO:0006508 proteolysis; GO:0006807 nitrogen compound metabolic process; GO:0007275 multicellular organism development; GO:0008152 metabolic process; GO:0009056 catabolic process; GO:0009057 macromolecule catabolic process; GO:0009555 pollen development; GO:0009987 cellular process; GO:0019538 protein metabolic process; GO:0030163 protein catabolic process; GO:0032501 multicellular organismal proc…	GO:0000323 lytic vacuole; GO:0005576 extracellular region; GO:0005615 extracellular space; GO:0005622 intracellular; GO:0005623 cell; GO:0005737 cytoplasm; GO:0005764 lysosome; GO:0005773 vacuole; GO:0043226 organelle; GO:0043227 membrane-bounded organelle; GO:0043229 intracellular organelle; GO:0043231 intracellular membrane-bounded organelle; GO:0044421 extracellular region part; GO:0044424 int…	GO:0003824 catalytic activity; GO:0004175 endopeptidase activity; GO:0004197 cysteine-type endopeptidase activity; GO:0008233 peptidase activity; GO:0008234 cysteine-type peptidase activity; GO:0016787 hydrolase activity; GO:0070011 peptidase activity, acting on L-amino acid peptides;				PF08246; PF00112	Cathepsin propeptide inhibitor domain (I29); Papain family cysteine protease	O	KOG4296	Epithelin/granulin
Capana00g001529	RL72_ARATH 60S ribosomal protein L7-2 OS=Arabidopsis thaliana GN=RPL7B PE=1 SV=1	RPL7B	cytoplasm	GO:0000463 maturation of LSU-rRNA from tricistronic rRNA transcript (SSU-rRNA, 5.8S rRNA, LSU-rRNA); GO:0000470 maturation of LSU-rRNA; GO:0002181 cytoplasmic translation; GO:0006139 nucleobase-containing compound metabolic process; GO:0006364 rRNA processing; GO:0006396 RNA processing; GO:0006412 translation; GO:0006518 peptide metabolic process; GO:0006725 cellular aromatic compound metabolic p…	GO:0005618 cell wall; GO:0005622 intracellular; GO:0005623 cell; GO:0005737 cytoplasm; GO:0005773 vacuole; GO:0005774 vacuolar membrane; GO:0005829 cytosol; GO:0005840 ribosome; GO:0005844 polysome; GO:0005886 plasma membrane; GO:0009507 chloroplast; GO:0009536 plastid; GO:0015934 large ribosomal subunit; GO:0016020 membrane; GO:0022625 cytosolic large ribosomal subunit; GO:0022626 cytosolic ribo…	GO:0003676 nucleic acid binding; GO:0003723 RNA binding; GO:0003729 mRNA binding; GO:0003735 structural constituent of ribosome; GO:0005198 structural molecule activity; GO:0005488 binding; GO:0097159 organic cyclic compound binding; GO:1901363 heterocyclic compound binding;	K02937	RP-L7e, RPL7; large subunit ribosomal protein L7e	cann03010 Ribosome	PF08079; PF00327	Ribosomal L30 N-terminal domain; Ribosomal protein L30p/L7e	J	KOG3184	60S ribosomal protein L7
Capana00g001653	SUBL_ARATH Subtilisin-like protease OS=Arabidopsis thaliana GN=ARA12 PE=1 SV=1	ARA12	nucleus							PF05922; PF00082	Peptidase inhibitor I9; Subtilase family
Capana00g001661	"ATPBM_NICPL ATP synthase subunit beta, mitochondrial OS=Nicotiana plumbaginifolia GN=ATPB PE=1 SV=1"	ATPB	mitochondria				K02133	ATPeF1B, ATP5B, ATP2; F-type H+-transporting ATPase subunit beta [EC:3.6.3.14]	cann00190 Oxidative phosphorylation; cann01100 Metabolic pathways	PF02874; PF00006	ATP synthase alpha/beta family, beta-barrel domain; ATP synthase alpha/beta family, nucleotide-binding domain	C	KOG1350	F0F1-type ATP synthase, beta subunit
Capana00g001712	PPR3_ARATH Pentatricopeptide repeat-containing protein At1g02150 OS=Arabidopsis thaliana GN=At1g02150 PE=2 SV=2	At1g02150	nucleus	GO:0006139 nucleobase-containing compound metabolic process; GO:0006725 cellular aromatic compound metabolic process; GO:0006807 nitrogen compound metabolic process; GO:0008152 metabolic process; GO:0009451 RNA modification; GO:0009987 cellular process; GO:0016070 RNA metabolic process; GO:0034641 cellular nitrogen compound metabolic process; GO:0043170 macromolecule metabolic process; GO:0043412…	GO:0005622 intracellular; GO:0005623 cell; GO:0005737 cytoplasm; GO:0009507 chloroplast; GO:0009536 plastid; GO:0043226 organelle; GO:0043227 membrane-bounded organelle; GO:0043229 intracellular organelle; GO:0043231 intracellular membrane-bounded organelle; GO:0044424 intracellular part; GO:0044444 cytoplasmic part; GO:0044464 cell part;	GO:0003676 nucleic acid binding; GO:0003723 RNA binding; GO:0003729 mRNA binding; GO:0003824 catalytic activity; GO:0004518 nuclease activity; GO:0004519 endonuclease activity; GO:0005488 binding; GO:0016787 hydrolase activity; GO:0016788 hydrolase activity, acting on ester bonds; GO:0097159 organic cyclic compound binding; GO:1901363 heterocyclic compound binding;						S	KOG4197	FOG: PPR repeat
Capana00g001727	RHIE_DICD3 Rhamnogalacturonate lyase OS=Dickeya dadantii (strain 3937) GN=rhiE PE=1 SV=1	rhiE	nucleus				K18195	RGL4, rhiE; rhamnogalacturonan endolyase [EC:4.2.2.23]
Capana00g001858	TNKS1_HUMAN Tankyrase-1 OS=Homo sapiens GN=TNKS PE=1 SV=2	TNKS	mitochondria									S	KOG0504	FOG: Ankyrin repeat
Capana00g001862	CYPH_SOLLC Peptidyl-prolyl cis-trans isomerase OS=Solanum lycopersicum GN=CYP PE=2 SV=1	CYP	chloroplast	GO:0000413 protein peptidyl-prolyl isomerization; GO:0006464 cellular protein modification process; GO:0006807 nitrogen compound metabolic process; GO:0007154 cell communication; GO:0007165 signal transduction; GO:0008152 metabolic process; GO:0009987 cellular process; GO:0018193 peptidyl-amino acid modification; GO:0018208 peptidyl-proline modification; GO:0019538 protein metabolic process; GO:0…	GO:0005576 extracellular region; GO:0005622 intracellular; GO:0005623 cell; GO:0005737 cytoplasm; GO:0005773 vacuole; GO:0005774 vacuolar membrane; GO:0005794 Golgi apparatus; GO:0005829 cytosol; GO:0005886 plasma membrane; GO:0005911 cell-cell junction; GO:0009506 plasmodesma; GO:0009507 chloroplast; GO:0009536 plastid; GO:0012505 endomembrane system; GO:0016020 membrane; GO:0030054 cell junctio…	GO:0003755 peptidyl-prolyl cis-trans isomerase activity; GO:0003824 catalytic activity; GO:0005488 binding; GO:0008144 drug binding; GO:0016018 cyclosporin A binding; GO:0016853 isomerase activity; GO:0016859 cis-trans isomerase activity; GO:0033218 amide binding; GO:0042277 peptide binding;	K01802	E5.2.1.8; peptidylprolyl isomerase [EC:5.2.1.8]		PF00160	Cyclophilin type peptidyl-prolyl cis-trans isomerase/CLD	O	KOG0865	Cyclophilin type peptidyl-prolyl cis-trans isomerase
Capana00g001880	Y1223_SYNY3 Epimerase family protein slr1223 OS=Synechocystis sp. (strain PCC 6803 / Kazusa) GN=slr1223 PE=3 SV=2	slr1223	cytoplasm	GO:0006996 organelle organization; GO:0009657 plastid organization; GO:0009658 chloroplast organization; GO:0009987 cellular process; GO:0010020 chloroplast fission; GO:0016043 cellular component organization; GO:0043572 plastid fission; GO:0048285 organelle fission; GO:0071840 cellular component organization or biogenesis;	GO:0005622 intracellular; GO:0005623 cell; GO:0005737 cytoplasm; GO:0009507 chloroplast; GO:0009526 plastid envelope; GO:0009536 plastid; GO:0009941 chloroplast envelope; GO:0031967 organelle envelope; GO:0031975 envelope; GO:0043226 organelle; GO:0043227 membrane-bounded organelle; GO:0043229 intracellular organelle; GO:0043231 intracellular membrane-bounded organelle; GO:0044422 organelle part;…	GO:0005488 binding; GO:0005515 protein binding; GO:0042802 identical protein binding; GO:0042803 protein homodimerization activity; GO:0046983 protein dimerization activity;	K07071	K07071; uncharacterized protein				F	KOG3019	Predicted nucleoside-diphosphate sugar epimerase
Capana00g001921	Y4967_ARATH Uncharacterized oxidoreductase At4g09670 OS=Arabidopsis thaliana GN=At4g09670 PE=1 SV=1	At4g09670	chloroplast									GQ	KOG2741	Dimeric dihydrodiol dehydrogenase
Capana00g002001	BLC_CITFR Outer membrane lipoprotein blc OS=Citrobacter freundii PE=3 SV=1	---	cytoplasm				K03098	APOD; apolipoprotein D and lipocalin family protein		PF08212	Lipocalin-like domain	M	KOG4824	Apolipoprotein D/Lipocalin
Capana00g002007	ACCH3_SOLLC 1-aminocyclopropane-1-carboxylate oxidase homolog OS=Solanum lycopersicum GN=ACO3 PE=2 SV=1	ACO3	nucleus							PF03171	2OG-Fe(II) oxygenase superfamily	Q	KOG0143	Iron/ascorbate family oxidoreductases
Capana00g002110	"LACS7_ARATH Long chain acyl-CoA synthetase 7, peroxisomal OS=Arabidopsis thaliana GN=LACS7 PE=1 SV=2"	LACS7	chloroplast	GO:0000302 response to reactive oxygen species; GO:0001101 response to acid chemical; GO:0001676 long-chain fatty acid metabolic process; GO:0006082 organic acid metabolic process; GO:0006629 lipid metabolic process; GO:0006631 fatty acid metabolic process; GO:0006950 response to stress; GO:0006970 response to osmotic stress; GO:0006979 response to oxidative stress; GO:0008152 metabolic process; …	GO:0005622 intracellular; GO:0005623 cell; GO:0005737 cytoplasm; GO:0005777 peroxisome; GO:0042579 microbody; GO:0043226 organelle; GO:0043227 membrane-bounded organelle; GO:0043229 intracellular organelle; GO:0043231 intracellular membrane-bounded organelle; GO:0044424 intracellular part; GO:0044444 cytoplasmic part; GO:0044464 cell part;	GO:0003824 catalytic activity; GO:0004467 long-chain fatty acid-CoA ligase activity; GO:0015645 fatty acid ligase activity; GO:0016405 CoA-ligase activity; GO:0016874 ligase activity; GO:0016877 ligase activity, forming carbon-sulfur bonds; GO:0016878 acid-thiol ligase activity;	K01897	ACSL, fadD; long-chain acyl-CoA synthetase [EC:6.2.1.3]	cann00061 Fatty acid biosynthesis; cann00071 Fatty acid degradation; cann01100 Metabolic pathways; cann01212 Fatty acid metabolism; cann04146 Peroxisome	PF13193	Domain of unknown function (DUF4009)	I	KOG1256	Long-chain acyl-CoA synthetases (AMP-forming)
Capana00g002111	AMPP1_SORMK Probable Xaa-Pro aminopeptidase P OS=Sordaria macrospora (strain ATCC MYA-333 / DSM 997 / K(L3346) / K-hell) GN=AMPP PE=3 SV=1	AMPP	chloroplast		GO:0005622 intracellular; GO:0005623 cell; GO:0005737 cytoplasm; GO:0009507 chloroplast; GO:0009532 plastid stroma; GO:0009536 plastid; GO:0009570 chloroplast stroma; GO:0043226 organelle; GO:0043227 membrane-bounded organelle; GO:0043229 intracellular organelle; GO:0043231 intracellular membrane-bounded organelle; GO:0044422 organelle part; GO:0044424 intracellular part; GO:0044434 chloroplast p…		K01262	pepP; Xaa-Pro aminopeptidase [EC:3.4.11.9]		PF01321; PF00557	Creatinase/Prolidase N-terminal domain; Metallopeptidase family M24	E	KOG2413	Xaa-Pro aminopeptidase
Capana00g002157	FURH_VIBFR Furcatin hydrolase OS=Viburnum furcatum PE=1 SV=1	---	cytoskeleton				K01188	E3.2.1.21; beta-glucosidase [EC:3.2.1.21]	cann00460 Cyanoamino acid metabolism; cann00500 Starch and sucrose metabolism; cann00940 Phenylpropanoid biosynthesis; cann01100 Metabolic pathways; cann01110 Biosynthesis of secondary metabolites	PF00232	Glycosyl hydrolase family 1	G	KOG0626	Beta-glucosidase, lactase phlorizinhydrolase, and related proteins
Capana00g002241	VIPI_SCHPO Protein vip1 OS=Schizosaccharomyces pombe (strain 972 / ATCC 24843) GN=vip1 PE=1 SV=1	vip1	cytoplasm			GO:0003676 nucleic acid binding; GO:0003723 RNA binding; GO:0005488 binding; GO:0097159 organic cyclic compound binding; GO:1901363 heterocyclic compound binding;				PF00076	RNA recognition motif. (a.k.a. RRM, RBD, or RNP domain)
Capana00g002249	AGD14_ARATH Probable ADP-ribosylation factor GTPase-activating protein AGD14 OS=Arabidopsis thaliana GN=AGD14 PE=1 SV=2	AGD14	nucleus							PF01412	Putative GTPase activating protein for Arf	T	KOG0702	Predicted GTPase-activating protein
Capana00g002259	"IDH1_ARATH Isocitrate dehydrogenase [NAD] regulatory subunit 1, mitochondrial OS=Arabidopsis thaliana GN=IDH1 PE=1 SV=2"	IDH1	chloroplast	GO:0006082 organic acid metabolic process; GO:0006091 generation of precursor metabolites and energy; GO:0006099 tricarboxylic acid cycle; GO:0006101 citrate metabolic process; GO:0006102 isocitrate metabolic process; GO:0008152 metabolic process; GO:0009060 aerobic respiration; GO:0009987 cellular process; GO:0015980 energy derivation by oxidation of organic compounds; GO:0016999 antibiotic meta…	GO:0005622 intracellular; GO:0005623 cell; GO:0005737 cytoplasm; GO:0005739 mitochondrion; GO:0043226 organelle; GO:0043227 membrane-bounded organelle; GO:0043229 intracellular organelle; GO:0043231 intracellular membrane-bounded organelle; GO:0044424 intracellular part; GO:0044444 cytoplasmic part; GO:0044464 cell part;	GO:0005488 binding; GO:0008270 zinc ion binding; GO:0043167 ion binding; GO:0043169 cation binding; GO:0046872 metal ion binding; GO:0046914 transition metal ion binding;	K00030	IDH3; isocitrate dehydrogenase (NAD+) [EC:1.1.1.41]	cann00020 Citrate cycle (TCA cycle); cann01100 Metabolic pathways; cann01110 Biosynthesis of secondary metabolites; cann01200 Carbon metabolism; cann01210 2-Oxocarboxylic acid metabolism; cann01230 Biosynthesis of amino acids	PF00180	Isocitrate/isopropylmalate dehydrogenase	E	KOG0784	Isocitrate dehydrogenase, gamma subunit
Capana00g002264	AB hydrolase-1 domain-containing protein	---	chloroplast							PF12697	Alpha/beta hydrolase family
Capana00g002266	AB hydrolase-1 domain-containing protein	---	chloroplast							PF12697	Alpha/beta hydrolase family
Capana00g002379	MBD10_ARATH Methyl-CpG-binding domain-containing protein 10 OS=Arabidopsis thaliana GN=MBD10 PE=1 SV=1	MBD10	nucleus
Capana00g002390	SUCD_METS5 Succinate-semialdehyde dehydrogenase (acetylating) OS=Metallosphaera sedula (strain ATCC 51363 / DSM 5348) GN=Msed_1424 PE=1 SV=1	Msed_1424	cytoplasm							PF08240	Alcohol dehydrogenase GroES-like domain	Q	KOG0022	Alcohol dehydrogenase, class III
Capana00g002436	PSMD1_MOUSE 26S proteasome non-ATPase regulatory subunit 1 OS=Mus musculus GN=Psmd1 PE=1 SV=1	Psmd1	endoplasmic reticulum	GO:0006508 proteolysis; GO:0006511 ubiquitin-dependent protein catabolic process; GO:0006807 nitrogen compound metabolic process; GO:0008152 metabolic process; GO:0009056 catabolic process; GO:0009057 macromolecule catabolic process; GO:0009987 cellular process; GO:0010498 proteasomal protein catabolic process; GO:0019538 protein metabolic process; GO:0019941 modification-dependent protein catabo…	GO:0000502 proteasome complex; GO:0005622 intracellular; GO:0005623 cell; GO:0005634 nucleus; GO:0005737 cytoplasm; GO:0005829 cytosol; GO:0005838 proteasome regulatory particle; GO:0005886 plasma membrane; GO:0008540 proteasome regulatory particle, base subcomplex; GO:0016020 membrane; GO:0022624 proteasome accessory complex; GO:0031597 cytosolic proteasome complex; GO:0032991 macromolecular com…		K03032	PSMD1, RPN2; 26S proteasome regulatory subunit N2	cann03050 Proteasome			O	KOG2062	26S proteasome regulatory complex, subunit RPN2/PSMD1
Capana00g002459	SYST_SOLLC Systemin OS=Solanum lycopersicum PE=1 SV=1	---	cytoplasm
Capana00g002479	RL141_ARATH 60S ribosomal protein L14-1 OS=Arabidopsis thaliana GN=RPL14A PE=2 SV=1	RPL14A	cytoplasm	GO:0006412 translation; GO:0006518 peptide metabolic process; GO:0006807 nitrogen compound metabolic process; GO:0008152 metabolic process; GO:0009058 biosynthetic process; GO:0009059 macromolecule biosynthetic process; GO:0009987 cellular process; GO:0010467 gene expression; GO:0019538 protein metabolic process; GO:0022613 ribonucleoprotein complex biogenesis; GO:0034641 cellular nitrogen compou…	GO:0005622 intracellular; GO:0005623 cell; GO:0005634 nucleus; GO:0005730 nucleolus; GO:0005737 cytoplasm; GO:0005773 vacuole; GO:0005774 vacuolar membrane; GO:0005783 endoplasmic reticulum; GO:0005829 cytosol; GO:0005840 ribosome; GO:0005844 polysome; GO:0005911 cell-cell junction; GO:0009506 plasmodesma; GO:0009507 chloroplast; GO:0009536 plastid; GO:0012505 endomembrane system; GO:0015934 larg…	GO:0003676 nucleic acid binding; GO:0003723 RNA binding; GO:0003729 mRNA binding; GO:0003735 structural constituent of ribosome; GO:0005198 structural molecule activity; GO:0005488 binding; GO:0097159 organic cyclic compound binding; GO:1901363 heterocyclic compound binding;	K02875	RP-L14e, RPL14; large subunit ribosomal protein L14e	cann03010 Ribosome			J	KOG3421	60S ribosomal protein L14
Capana00g002500	COTA_BACSU Spore coat protein A OS=Bacillus subtilis GN=cotA PE=1 SV=4	cotA	cytoplasm	GO:0006950 response to stress; GO:0007154 cell communication; GO:0008152 metabolic process; GO:0009267 cellular response to starvation; GO:0009605 response to external stimulus; GO:0009628 response to abiotic stimulus; GO:0009888 tissue development; GO:0009987 cellular process; GO:0009991 response to extracellular stimulus; GO:0010073 meristem maintenance; GO:0016036 cellular response to phosphat…	GO:0005618 cell wall; GO:0005622 intracellular; GO:0005623 cell; GO:0005737 cytoplasm; GO:0005783 endoplasmic reticulum; GO:0005794 Golgi apparatus; GO:0005829 cytosol; GO:0012505 endomembrane system; GO:0016020 membrane; GO:0030312 external encapsulating structure; GO:0043226 organelle; GO:0043227 membrane-bounded organelle; GO:0043229 intracellular organelle; GO:0043231 intracellular membrane-b…	GO:0003824 catalytic activity; GO:0016491 oxidoreductase activity; GO:0016679 oxidoreductase activity, acting on diphenols and related substances as donors; GO:0016682 oxidoreductase activity, acting on diphenols and related substances as donors, oxygen as acceptor; GO:0016722 oxidoreductase activity, oxidizing metal ions; GO:0052716 hydroquinone:oxygen oxidoreductase activity;				PF07732; PF00394; PF07731	Multicopper oxidase; Multicopper oxidase; Multicopper oxidase
Capana00g002515	Y1926_ARATH UPF0678 fatty acid-binding protein-like protein At1g79260 OS=Arabidopsis thaliana GN=At1g79260 PE=1 SV=1	At1g79260	nucleus		GO:0005622 intracellular; GO:0005623 cell; GO:0005737 cytoplasm; GO:0005829 cytosol; GO:0044424 intracellular part; GO:0044444 cytoplasmic part; GO:0044464 cell part;					PF08768	Domain of unknown function (DUF1794)	S	KOG3371	Uncharacterized conserved protein
Capana00g002531	CYPR1_CYNCA Cyprosin (Fragment) OS=Cynara cardunculus GN=CYPRO1 PE=1 SV=2	CYPRO1	chloroplast	GO:0006508 proteolysis; GO:0006807 nitrogen compound metabolic process; GO:0008152 metabolic process; GO:0009056 catabolic process; GO:0009057 macromolecule catabolic process; GO:0019538 protein metabolic process; GO:0030163 protein catabolic process; GO:0043170 macromolecule metabolic process; GO:0044238 primary metabolic process; GO:0071704 organic substance metabolic process; GO:1901564 organo…		GO:0003824 catalytic activity; GO:0004175 endopeptidase activity; GO:0004190 aspartic-type endopeptidase activity; GO:0008233 peptidase activity; GO:0016787 hydrolase activity; GO:0070001 aspartic-type peptidase activity; GO:0070011 peptidase activity, acting on L-amino acid peptides;	K08245	E3.4.23.40; phytepsin [EC:3.4.23.40]		PF05184	Saposin-like type B, region 1	O	KOG1339	Aspartyl protease
Capana00g002602	APBLA_ARATH Beta-adaptin-like protein A OS=Arabidopsis thaliana GN=BETAA-AD PE=1 SV=1	BETAA-AD	chloroplast			GO:0005488 binding; GO:0005515 protein binding; GO:0019899 enzyme binding; GO:0019900 kinase binding; GO:0019901 protein kinase binding; GO:0043424 protein histidine kinase binding;				PF09066	Beta2-adaptin appendage, C-terminal sub-domain	U	KOG1061	Vesicle coat complex AP-1/AP-2/AP-4, beta subunit
Capana00g002624	"LEU32_ARATH 3-isopropylmalate dehydrogenase 2, chloroplastic OS=Arabidopsis thaliana GN=IMDH2 PE=1 SV=1"	IMDH2	chloroplast	GO:0006082 organic acid metabolic process; GO:0006790 sulfur compound metabolic process; GO:0006807 nitrogen compound metabolic process; GO:0006950 response to stress; GO:0006970 response to osmotic stress; GO:0008152 metabolic process; GO:0009058 biosynthetic process; GO:0009628 response to abiotic stimulus; GO:0009651 response to salt stress; GO:0009987 cellular process; GO:0016143 S-glycoside …	GO:0005622 intracellular; GO:0005623 cell; GO:0005737 cytoplasm; GO:0009507 chloroplast; GO:0009526 plastid envelope; GO:0009532 plastid stroma; GO:0009536 plastid; GO:0009570 chloroplast stroma; GO:0009579 thylakoid; GO:0009941 chloroplast envelope; GO:0031967 organelle envelope; GO:0031975 envelope; GO:0043226 organelle; GO:0043227 membrane-bounded organelle; GO:0043229 intracellular organelle;…		K00052	leuB, IMDH; 3-isopropylmalate dehydrogenase [EC:1.1.1.85]	cann00290 Valine, leucine and isoleucine biosynthesis; cann00660 C5-Branched dibasic acid metabolism; cann01100 Metabolic pathways; cann01110 Biosynthesis of secondary metabolites; cann01210 2-Oxocarboxylic acid metabolism; cann01230 Biosynthesis of amino acids	PF00180	Isocitrate/isopropylmalate dehydrogenase	E	KOG0786	3-isopropylmalate dehydrogenase
Capana00g002646	integrator complex subunit 3 homolog	---	nucleus							PF00564	PB1 domain
Capana00g002729	"CPNB4_ARATH Chaperonin 60 subunit beta 4, chloroplastic OS=Arabidopsis thaliana GN=CPN60B4 PE=1 SV=1"	CPN60B4	chloroplast	GO:0006457 protein folding; GO:0006458 'de novo' protein folding; GO:0009987 cellular process; GO:0061077 chaperone-mediated protein folding;	GO:0005622 intracellular; GO:0005623 cell; GO:0005737 cytoplasm; GO:0005829 cytosol; GO:0009507 chloroplast; GO:0009526 plastid envelope; GO:0009532 plastid stroma; GO:0009536 plastid; GO:0009570 chloroplast stroma; GO:0009941 chloroplast envelope; GO:0031967 organelle envelope; GO:0031975 envelope; GO:0043226 organelle; GO:0043227 membrane-bounded organelle; GO:0043229 intracellular organelle; G…	GO:0005488 binding; GO:0005515 protein binding; GO:0044183 protein binding involved in protein folding; GO:0051082 unfolded protein binding;	K04077	groEL, HSPD1; chaperonin GroEL	cann03018 RNA degradation			O	KOG0356	Mitochondrial chaperonin, Cpn60/Hsp60p
Capana00g002731	"6PGD_SYNE7 6-phosphogluconate dehydrogenase, decarboxylating OS=Synechococcus elongatus (strain PCC 7942) GN=gnd PE=1 SV=4"	gnd	chloroplast	GO:0000003 reproduction; GO:0001101 response to acid chemical; GO:0006950 response to stress; GO:0006970 response to osmotic stress; GO:0008037 cell recognition; GO:0008152 metabolic process; GO:0009266 response to temperature stimulus; GO:0009409 response to cold; GO:0009414 response to water deprivation; GO:0009415 response to water; GO:0009566 fertilization; GO:0009567 double fertilization for…	GO:0005622 intracellular; GO:0005623 cell; GO:0005737 cytoplasm; GO:0005777 peroxisome; GO:0005829 cytosol; GO:0009507 chloroplast; GO:0009532 plastid stroma; GO:0009536 plastid; GO:0009570 chloroplast stroma; GO:0019822 P4 peroxisome; GO:0042579 microbody; GO:0043226 organelle; GO:0043227 membrane-bounded organelle; GO:0043229 intracellular organelle; GO:0043231 intracellular membrane-bounded or…	GO:0003824 catalytic activity; GO:0004616 phosphogluconate dehydrogenase (decarboxylating) activity; GO:0016491 oxidoreductase activity; GO:0016614 oxidoreductase activity, acting on CH-OH group of donors; GO:0016616 oxidoreductase activity, acting on the CH-OH group of donors, NAD or NADP as acceptor;	K00033	PGD, gnd, gntZ; 6-phosphogluconate dehydrogenase [EC:1.1.1.44 1.1.1.343]	cann00030 Pentose phosphate pathway; cann00480 Glutathione metabolism; cann01100 Metabolic pathways; cann01110 Biosynthesis of secondary metabolites; cann01200 Carbon metabolism	PF03446; PF00393	NAD binding domain of 6-phosphogluconate dehydrogenase; 6-phosphogluconate dehydrogenase, C-terminal domain	G	KOG2653	6-phosphogluconate dehydrogenase
Capana00g002792	GLGA_PARUW Glycogen synthase OS=Protochlamydia amoebophila (strain UWE25) GN=glgA PE=3 SV=1	glgA	chloroplast	GO:0000271 polysaccharide biosynthetic process; GO:0005975 carbohydrate metabolic process; GO:0005976 polysaccharide metabolic process; GO:0005982 starch metabolic process; GO:0006073 cellular glucan metabolic process; GO:0008152 metabolic process; GO:0009058 biosynthetic process; GO:0009059 macromolecule biosynthetic process; GO:0009250 glucan biosynthetic process; GO:0009987 cellular process; G…	GO:0005622 intracellular; GO:0005623 cell; GO:0005737 cytoplasm; GO:0009507 chloroplast; GO:0009536 plastid; GO:0043226 organelle; GO:0043227 membrane-bounded organelle; GO:0043229 intracellular organelle; GO:0043231 intracellular membrane-bounded organelle; GO:0044424 intracellular part; GO:0044444 cytoplasmic part; GO:0044464 cell part;	GO:0003824 catalytic activity; GO:0009011 starch synthase activity; GO:0016740 transferase activity; GO:0016757 transferase activity, transferring glycosyl groups; GO:0016758 transferase activity, transferring hexosyl groups; GO:0046527 glucosyltransferase activity;	K00703	glgA; starch synthase [EC:2.4.1.21]	cann00500 Starch and sucrose metabolism; cann01100 Metabolic pathways; cann01110 Biosynthesis of secondary metabolites	PF08323	Starch synthase catalytic domain
Capana00g002793	"CB2B_SOLLC Chlorophyll a-b binding protein 1B, chloroplastic OS=Solanum lycopersicum GN=CAB1B PE=3 SV=1"	CAB1B	chloroplast				K08912	LHCB1; light-harvesting complex II chlorophyll a/b binding protein 1	cann00196 Photosynthesis - antenna proteins; cann01100 Metabolic pathways
Capana00g002796	"CB2B_SOLLC Chlorophyll a-b binding protein 1B, chloroplastic OS=Solanum lycopersicum GN=CAB1B PE=3 SV=1"	CAB1B	chloroplast				K08912	LHCB1; light-harvesting complex II chlorophyll a/b binding protein 1	cann00196 Photosynthesis - antenna proteins; cann01100 Metabolic pathways
Capana00g002799	"CB22_TOBAC Chlorophyll a-b binding protein 21, chloroplastic OS=Nicotiana tabacum GN=CAB21 PE=2 SV=1"	CAB21	chloroplast	GO:0006091 generation of precursor metabolites and energy; GO:0008152 metabolic process; GO:0009314 response to radiation; GO:0009416 response to light stimulus; GO:0009628 response to abiotic stimulus; GO:0009765 photosynthesis, light harvesting; GO:0009768 photosynthesis, light harvesting in photosystem I; GO:0009987 cellular process; GO:0015979 photosynthesis; GO:0019684 photosynthesis, light …	GO:0005622 intracellular; GO:0005623 cell; GO:0005737 cytoplasm; GO:0009507 chloroplast; GO:0009526 plastid envelope; GO:0009532 plastid stroma; GO:0009534 chloroplast thylakoid; GO:0009535 chloroplast thylakoid membrane; GO:0009536 plastid; GO:0009570 chloroplast stroma; GO:0009579 thylakoid; GO:0009941 chloroplast envelope; GO:0010287 plastoglobule; GO:0016020 membrane; GO:0031967 organelle env…	GO:0005488 binding; GO:0016168 chlorophyll binding; GO:0031409 pigment binding; GO:0043167 ion binding; GO:0043168 anion binding; GO:0046906 tetrapyrrole binding; GO:0048037 cofactor binding; GO:0097159 organic cyclic compound binding; GO:1901363 heterocyclic compound binding;	K08912	LHCB1; light-harvesting complex II chlorophyll a/b binding protein 1	cann00196 Photosynthesis - antenna proteins; cann01100 Metabolic pathways
Capana00g002800	"CB2B_SOLLC Chlorophyll a-b binding protein 1B, chloroplastic OS=Solanum lycopersicum GN=CAB1B PE=3 SV=1"	CAB1B	chloroplast				K08912	LHCB1; light-harvesting complex II chlorophyll a/b binding protein 1	cann00196 Photosynthesis - antenna proteins; cann01100 Metabolic pathways
Capana00g002801	"CB22_TOBAC Chlorophyll a-b binding protein 21, chloroplastic OS=Nicotiana tabacum GN=CAB21 PE=2 SV=1"	CAB21	chloroplast				K08912	LHCB1; light-harvesting complex II chlorophyll a/b binding protein 1	cann00196 Photosynthesis - antenna proteins; cann01100 Metabolic pathways
Capana00g002802	"CB22_TOBAC Chlorophyll a-b binding protein 21, chloroplastic OS=Nicotiana tabacum GN=CAB21 PE=2 SV=1"	CAB21	chloroplast				K08912	LHCB1; light-harvesting complex II chlorophyll a/b binding protein 1	cann00196 Photosynthesis - antenna proteins; cann01100 Metabolic pathways
Capana00g002830	"HEM2_ARATH Delta-aminolevulinic acid dehydratase, chloroplastic OS=Arabidopsis thaliana GN=HEMB PE=1 SV=1"	HEMB	chloroplast	GO:0006725 cellular aromatic compound metabolic process; GO:0006778 porphyrin-containing compound metabolic process; GO:0006779 porphyrin-containing compound biosynthetic process; GO:0006783 heme biosynthetic process; GO:0006807 nitrogen compound metabolic process; GO:0008152 metabolic process; GO:0009058 biosynthetic process; GO:0009987 cellular process; GO:0018130 heterocycle biosynthetic proce…	GO:0005622 intracellular; GO:0005623 cell; GO:0005737 cytoplasm; GO:0005829 cytosol; GO:0009507 chloroplast; GO:0009532 plastid stroma; GO:0009536 plastid; GO:0009570 chloroplast stroma; GO:0043226 organelle; GO:0043227 membrane-bounded organelle; GO:0043229 intracellular organelle; GO:0043231 intracellular membrane-bounded organelle; GO:0044422 organelle part; GO:0044424 intracellular part; GO:0…	GO:0003824 catalytic activity; GO:0004655 porphobilinogen synthase activity; GO:0005488 binding; GO:0008270 zinc ion binding; GO:0016829 lyase activity; GO:0016835 carbon-oxygen lyase activity; GO:0016836 hydro-lyase activity; GO:0043167 ion binding; GO:0043169 cation binding; GO:0046872 metal ion binding; GO:0046914 transition metal ion binding;	K01698	hemB, ALAD; porphobilinogen synthase [EC:4.2.1.24]	cann00860 Porphyrin and chlorophyll metabolism; cann01100 Metabolic pathways; cann01110 Biosynthesis of secondary metabolites	PF00490	Delta-aminolevulinic acid dehydratase	H	KOG2794	Delta-aminolevulinic acid dehydratase
Capana00g002855	NEP1_NEPGR Aspartic proteinase nepenthesin-1 OS=Nepenthes gracilis GN=nep1 PE=1 SV=1	nep1	endoplasmic reticulum									O	KOG1339	Aspartyl protease
Capana00g002861	PPA26_ARATH Bifunctional purple acid phosphatase 26 OS=Arabidopsis thaliana GN=PAP26 PE=1 SV=1	PAP26	vacuolar membrane	GO:0006793 phosphorus metabolic process; GO:0006796 phosphate-containing compound metabolic process; GO:0008152 metabolic process; GO:0009987 cellular process; GO:0016311 dephosphorylation; GO:0042592 homeostatic process; GO:0044237 cellular metabolic process; GO:0048878 chemical homeostasis; GO:0050801 ion homeostasis; GO:0055062 phosphate ion homeostasis; GO:0055081 anion homeostasis; GO:005508…	GO:0005618 cell wall; GO:0005622 intracellular; GO:0005623 cell; GO:0005737 cytoplasm; GO:0005773 vacuole; GO:0005829 cytosol; GO:0009505 plant-type cell wall; GO:0030312 external encapsulating structure; GO:0043226 organelle; GO:0043227 membrane-bounded organelle; GO:0043229 intracellular organelle; GO:0043231 intracellular membrane-bounded organelle; GO:0044424 intracellular part; GO:0044444 cy…	GO:0003824 catalytic activity; GO:0003993 acid phosphatase activity; GO:0016787 hydrolase activity; GO:0016788 hydrolase activity, acting on ester bonds; GO:0016791 phosphatase activity; GO:0042578 phosphoric ester hydrolase activity;	K22390			PF00149; PF14008	Calcineurin-like phosphoesterase; Iron/zinc purple acid phosphatase-like protein C	G	KOG1378	Purple acid phosphatase
Capana00g002879	NMCP_ARATH Putative nuclear matrix constituent protein 1-like protein OS=Arabidopsis thaliana GN=At5g65770 PE=2 SV=1	At5g65770	cytoplasm	GO:0006996 organelle organization; GO:0006997 nucleus organization; GO:0009987 cellular process; GO:0016043 cellular component organization; GO:0032535 regulation of cellular component size; GO:0065007 biological regulation; GO:0065008 regulation of biological quality; GO:0071840 cellular component organization or biogenesis; GO:0090066 regulation of anatomical structure size; GO:0097298 regulati…	GO:0000229 cytoplasmic chromosome; GO:0000785 chromatin; GO:0000789 cytoplasmic chromatin; GO:0005622 intracellular; GO:0005623 cell; GO:0005634 nucleus; GO:0005635 nuclear envelope; GO:0005652 nuclear lamina; GO:0005654 nucleoplasm; GO:0005694 chromosome; GO:0005737 cytoplasm; GO:0005829 cytosol; GO:0012505 endomembrane system; GO:0031967 organelle envelope; GO:0031974 membrane-enclosed lumen; G…
Capana00g002925	TCPH_CHICK T-complex protein 1 subunit eta OS=Gallus gallus GN=CCT7 PE=1 SV=1	CCT7	cytoplasm	GO:0000003 reproduction; GO:0006457 protein folding; GO:0006458 'de novo' protein folding; GO:0006810 transport; GO:0007338 single fertilization; GO:0007339 binding of sperm to zona pellucida; GO:0008037 cell recognition; GO:0009566 fertilization; GO:0009889 regulation of biosynthetic process; GO:0009891 positive regulation of biosynthetic process; GO:0009893 positive regulation of metabolic proc…	GO:0002199 zona pellucida receptor complex; GO:0005622 intracellular; GO:0005623 cell; GO:0005737 cytoplasm; GO:0005829 cytosol; GO:0005832 chaperonin-containing T-complex; GO:0005856 cytoskeleton; GO:0005874 microtubule; GO:0015630 microtubule cytoskeleton; GO:0032991 macromolecular complex; GO:0043226 organelle; GO:0043228 non-membrane-bounded organelle; GO:0043229 intracellular organelle; GO:0…	GO:0005488 binding; GO:0005515 protein binding; GO:0042802 identical protein binding; GO:0044183 protein binding involved in protein folding; GO:0051082 unfolded protein binding;	K09499	CCT7; T-complex protein 1 subunit eta				O	KOG0361	Chaperonin complex component, TCP-1 eta subunit (CCT7)
Capana00g002943	URIC1_SOYBN Uricase-2 isozyme 1 OS=Glycine max PE=1 SV=2	---	peroxisome	GO:0006996 organelle organization; GO:0007031 peroxisome organization; GO:0008152 metabolic process; GO:0009987 cellular process; GO:0016043 cellular component organization; GO:0055114 oxidation-reduction process; GO:0071840 cellular component organization or biogenesis;	GO:0005622 intracellular; GO:0005623 cell; GO:0005737 cytoplasm; GO:0005777 peroxisome; GO:0042579 microbody; GO:0043226 organelle; GO:0043227 membrane-bounded organelle; GO:0043229 intracellular organelle; GO:0043231 intracellular membrane-bounded organelle; GO:0044424 intracellular part; GO:0044444 cytoplasmic part; GO:0044464 cell part;	GO:0003824 catalytic activity; GO:0004846 urate oxidase activity; GO:0016491 oxidoreductase activity; GO:0016661 oxidoreductase activity, acting on other nitrogenous compounds as donors; GO:0016663 oxidoreductase activity, acting on other nitrogenous compounds as donors, oxygen as acceptor;	K00365	uaZ; urate oxidase [EC:1.7.3.3]	cann00230 Purine metabolism; cann00232 Caffeine metabolism; cann01100 Metabolic pathways	PF01014	Uricase	Q	KOG1599	Uricase (urate oxidase)
Capana00g002959	"GLO2D_ARATH Probable hydroxyacylglutathione hydrolase 2, chloroplast OS=Arabidopsis thaliana GN=GLX2-4 PE=2 SV=1"	GLX2-4	chloroplast	GO:0001101 response to acid chemical; GO:0006950 response to stress; GO:0006970 response to osmotic stress; GO:0009628 response to abiotic stimulus; GO:0009651 response to salt stress; GO:0010033 response to organic substance; GO:0010243 response to organonitrogen compound; GO:0034059 response to anoxia; GO:0036293 response to decreased oxygen levels; GO:0042221 response to chemical; GO:0043200 r…	GO:0005622 intracellular; GO:0005623 cell; GO:0005737 cytoplasm; GO:0005739 mitochondrion; GO:0009507 chloroplast; GO:0009536 plastid; GO:0043226 organelle; GO:0043227 membrane-bounded organelle; GO:0043229 intracellular organelle; GO:0043231 intracellular membrane-bounded organelle; GO:0044424 intracellular part; GO:0044444 cytoplasmic part; GO:0044464 cell part;	GO:0003824 catalytic activity; GO:0004416 hydroxyacylglutathione hydrolase activity; GO:0005488 binding; GO:0005506 iron ion binding; GO:0008270 zinc ion binding; GO:0008800 beta-lactamase activity; GO:0016787 hydrolase activity; GO:0016788 hydrolase activity, acting on ester bonds; GO:0016790 thiolester hydrolase activity; GO:0016810 hydrolase activity, acting on carbon-nitrogen (but not peptide…	K01069	gloB, HAGH; hydroxyacylglutathione hydrolase [EC:3.1.2.6]	cann00620 Pyruvate metabolism; cann01100 Metabolic pathways	PF00753	Metallo-beta-lactamase superfamily	S	KOG0813	Glyoxylase
Capana00g003007	PME34_ARATH Probable pectinesterase/pectinesterase inhibitor 34 OS=Arabidopsis thaliana GN=PME34 PE=2 SV=1	PME34	chloroplast	GO:0010119 regulation of stomatal movement; GO:0043086 negative regulation of catalytic activity; GO:0044092 negative regulation of molecular function; GO:0050789 regulation of biological process; GO:0050790 regulation of catalytic activity; GO:0050794 regulation of cellular process; GO:0065007 biological regulation; GO:0065009 regulation of molecular function;	GO:0005618 cell wall; GO:0005623 cell; GO:0005886 plasma membrane; GO:0009505 plant-type cell wall; GO:0016020 membrane; GO:0030312 external encapsulating structure; GO:0044464 cell part; GO:0071944 cell periphery;	GO:0003824 catalytic activity; GO:0004857 enzyme inhibitor activity; GO:0016787 hydrolase activity; GO:0016788 hydrolase activity, acting on ester bonds; GO:0030234 enzyme regulator activity; GO:0030599 pectinesterase activity; GO:0046910 pectinesterase inhibitor activity; GO:0052689 carboxylic ester hydrolase activity; GO:0098772 molecular function regulator;				PF04043	Plant invertase/pectin methylesterase inhibitor
Capana00g003039	GLUA_DICDI Lysosomal beta glucosidase OS=Dictyostelium discoideum GN=gluA PE=1 SV=2	gluA	cytoplasm	GO:0000272 polysaccharide catabolic process; GO:0005975 carbohydrate metabolic process; GO:0005976 polysaccharide metabolic process; GO:0008152 metabolic process; GO:0009056 catabolic process; GO:0009057 macromolecule catabolic process; GO:0009251 glucan catabolic process; GO:0016052 carbohydrate catabolic process; GO:0043170 macromolecule metabolic process; GO:0044042 glucan metabolic process; G…	GO:0000323 lytic vacuole; GO:0005622 intracellular; GO:0005623 cell; GO:0005737 cytoplasm; GO:0005764 lysosome; GO:0005773 vacuole; GO:0005886 plasma membrane; GO:0016020 membrane; GO:0043226 organelle; GO:0043227 membrane-bounded organelle; GO:0043229 intracellular organelle; GO:0043231 intracellular membrane-bounded organelle; GO:0044424 intracellular part; GO:0044444 cytoplasmic part; GO:00444…	GO:0003824 catalytic activity; GO:0004553 hydrolase activity, hydrolyzing O-glycosyl compounds; GO:0008422 beta-glucosidase activity; GO:0015926 glucosidase activity; GO:0016787 hydrolase activity; GO:0016798 hydrolase activity, acting on glycosyl bonds;	K05349	bglX; beta-glucosidase [EC:3.2.1.21]	cann00460 Cyanoamino acid metabolism; cann00500 Starch and sucrose metabolism; cann00940 Phenylpropanoid biosynthesis; cann01100 Metabolic pathways; cann01110 Biosynthesis of secondary metabolites	PF00933; PF01915	Glycosyl hydrolase family 3 N terminal domain; Glycosyl hydrolase family 3 C-terminal domain
Capana00g003043	"CYSZ_CUCMA Citrate synthase, glyoxysomal OS=Cucurbita maxima PE=1 SV=1"	---	chloroplast	GO:0006082 organic acid metabolic process; GO:0006629 lipid metabolic process; GO:0006631 fatty acid metabolic process; GO:0006635 fatty acid beta-oxidation; GO:0008152 metabolic process; GO:0009056 catabolic process; GO:0009062 fatty acid catabolic process; GO:0009987 cellular process; GO:0016042 lipid catabolic process; GO:0016054 organic acid catabolic process; GO:0019395 fatty acid oxidation;…	GO:0005622 intracellular; GO:0005623 cell; GO:0005737 cytoplasm; GO:0005777 peroxisome; GO:0005911 cell-cell junction; GO:0009506 plasmodesma; GO:0009514 glyoxysome; GO:0030054 cell junction; GO:0042579 microbody; GO:0043226 organelle; GO:0043227 membrane-bounded organelle; GO:0043229 intracellular organelle; GO:0043231 intracellular membrane-bounded organelle; GO:0044424 intracellular part; GO:0…	GO:0003824 catalytic activity; GO:0004108 citrate (Si)-synthase activity; GO:0016740 transferase activity; GO:0016746 transferase activity, transferring acyl groups; GO:0036440 citrate synthase activity; GO:0046912 transferase activity, transferring acyl groups, acyl groups converted into alkyl on transfer;	K01647	CS, gltA; citrate synthase [EC:2.3.3.1]	cann00020 Citrate cycle (TCA cycle); cann00630 Glyoxylate and dicarboxylate metabolism; cann01100 Metabolic pathways; cann01110 Biosynthesis of secondary metabolites; cann01200 Carbon metabolism; cann01210 2-Oxocarboxylic acid metabolism; cann01230 Biosynthesis of amino acids	PF00285	Citrate synthase	H	KOG2617	Citrate synthase
Capana00g003058	"GYRB_NICBE DNA gyrase subunit B, chloroplastic/mitochondrial OS=Nicotiana benthamiana GN=GYRB PE=2 SV=1"	GYRB	chloroplast	GO:0006139 nucleobase-containing compound metabolic process; GO:0006259 DNA metabolic process; GO:0006265 DNA topological change; GO:0006725 cellular aromatic compound metabolic process; GO:0006807 nitrogen compound metabolic process; GO:0006996 organelle organization; GO:0007059 chromosome segregation; GO:0008152 metabolic process; GO:0009987 cellular process; GO:0016043 cellular component organ…	GO:0005622 intracellular; GO:0005623 cell; GO:0005737 cytoplasm; GO:0005739 mitochondrion; GO:0009295 nucleoid; GO:0043226 organelle; GO:0043227 membrane-bounded organelle; GO:0043229 intracellular organelle; GO:0043231 intracellular membrane-bounded organelle; GO:0044424 intracellular part; GO:0044444 cytoplasmic part; GO:0044464 cell part;	GO:0003824 catalytic activity; GO:0003916 DNA topoisomerase activity; GO:0003918 DNA topoisomerase type II (ATP-hydrolyzing) activity; GO:0008094 DNA-dependent ATPase activity; GO:0016462 pyrophosphatase activity; GO:0016787 hydrolase activity; GO:0016817 hydrolase activity, acting on acid anhydrides; GO:0016818 hydrolase activity, acting on acid anhydrides, in phosphorus-containing anhydrides; G…	K02470	gyrB; DNA gyrase subunit B [EC:5.99.1.3]				B	KOG0355	DNA topoisomerase type II
Capana00g003075	TPK1_MOUSE Thiamin pyrophosphokinase 1 OS=Mus musculus GN=Tpk1 PE=1 SV=1	Tpk1	cytoplasm	GO:0006725 cellular aromatic compound metabolic process; GO:0006732 coenzyme metabolic process; GO:0006766 vitamin metabolic process; GO:0006767 water-soluble vitamin metabolic process; GO:0006772 thiamine metabolic process; GO:0006790 sulfur compound metabolic process; GO:0006793 phosphorus metabolic process; GO:0006796 phosphate-containing compound metabolic process; GO:0006807 nitrogen compoun…	GO:0005622 intracellular; GO:0005623 cell; GO:0005737 cytoplasm; GO:0005829 cytosol; GO:0044424 intracellular part; GO:0044444 cytoplasmic part; GO:0044464 cell part;	GO:0003824 catalytic activity; GO:0004788 thiamine diphosphokinase activity; GO:0016740 transferase activity; GO:0016772 transferase activity, transferring phosphorus-containing groups; GO:0016778 diphosphotransferase activity;	K00949	thiN, TPK1, THI80; thiamine pyrophosphokinase [EC:2.7.6.2]	cann00730 Thiamine metabolism; cann01100 Metabolic pathways	PF04263; PF04265	Thiamin pyrophosphokinase, catalytic domain; Thiamin pyrophosphokinase, vitamin B1 binding domain	H	KOG3153	Thiamine pyrophosphokinase
Capana00g003078	CS domain-containing protein (Fragment)	---	cytoplasm	GO:0007275 multicellular organism development; GO:0009888 tissue development; GO:0009893 positive regulation of metabolic process; GO:0009966 regulation of signal transduction; GO:0009968 negative regulation of signal transduction; GO:0010449 root meristem growth; GO:0010468 regulation of gene expression; GO:0010604 positive regulation of macromolecule metabolic process; GO:0010628 positive regul…	GO:0005622 intracellular; GO:0005623 cell; GO:0005634 nucleus; GO:0005737 cytoplasm; GO:0005829 cytosol; GO:0005886 plasma membrane; GO:0005911 cell-cell junction; GO:0009506 plasmodesma; GO:0016020 membrane; GO:0030054 cell junction; GO:0043226 organelle; GO:0043227 membrane-bounded organelle; GO:0043229 intracellular organelle; GO:0043231 intracellular membrane-bounded organelle; GO:0044424 int…					PF04969	CS domain	O	KOG3158	HSP90 co-chaperone p23
Capana00g003079	AB4C_ARATH ABC transporter C family member 4 OS=Arabidopsis thaliana GN=ABCC4 PE=1 SV=2	ABCC4	plasma membrane	GO:0001101 response to acid chemical; GO:0006810 transport; GO:0006855 drug transmembrane transport; GO:0006950 response to stress; GO:0009414 response to water deprivation; GO:0009415 response to water; GO:0009605 response to external stimulus; GO:0009607 response to biotic stimulus; GO:0009611 response to wounding; GO:0009624 response to nematode; GO:0009628 response to abiotic stimulus; GO:000…	GO:0000325 plant-type vacuole; GO:0005622 intracellular; GO:0005623 cell; GO:0005737 cytoplasm; GO:0005773 vacuole; GO:0005774 vacuolar membrane; GO:0005794 Golgi apparatus; GO:0005886 plasma membrane; GO:0005911 cell-cell junction; GO:0009506 plasmodesma; GO:0012505 endomembrane system; GO:0016020 membrane; GO:0030054 cell junction; GO:0031090 organelle membrane; GO:0043226 organelle; GO:0043227…	GO:0003824 catalytic activity; GO:0005215 transporter activity; GO:0015399 primary active transmembrane transporter activity; GO:0015405 P-P-bond-hydrolysis-driven transmembrane transporter activity; GO:0016462 pyrophosphatase activity; GO:0016787 hydrolase activity; GO:0016817 hydrolase activity, acting on acid anhydrides; GO:0016818 hydrolase activity, acting on acid anhydrides, in phosphorus-c…				PF00005	ABC transporter	Q	KOG0054	Multidrug resistance-associated protein/mitoxantrone resistance protein, ABC superfamily
Capana00g003084	ABA2_ARATH Xanthoxin dehydrogenase OS=Arabidopsis thaliana GN=ABA2 PE=1 SV=1	ABA2	cytoplasm	GO:0001101 response to acid chemical; GO:0006066 alcohol metabolic process; GO:0006082 organic acid metabolic process; GO:0006520 cellular amino acid metabolic process; GO:0006560 proline metabolic process; GO:0006561 proline biosynthetic process; GO:0006629 lipid metabolic process; GO:0006714 sesquiterpenoid metabolic process; GO:0006720 isoprenoid metabolic process; GO:0006721 terpenoid metabol…	GO:0005622 intracellular; GO:0005623 cell; GO:0005737 cytoplasm; GO:0005829 cytosol; GO:0044424 intracellular part; GO:0044444 cytoplasmic part; GO:0044464 cell part;	GO:0003824 catalytic activity; GO:0004022 alcohol dehydrogenase (NAD) activity; GO:0010301 xanthoxin dehydrogenase activity; GO:0016491 oxidoreductase activity; GO:0016614 oxidoreductase activity, acting on CH-OH group of donors; GO:0016616 oxidoreductase activity, acting on the CH-OH group of donors, NAD or NADP as acceptor;	K09841	ABA2; xanthoxin dehydrogenase [EC:1.1.1.288]	cann00906 Carotenoid biosynthesis; cann01100 Metabolic pathways; cann01110 Biosynthesis of secondary metabolites	PF13561	Enoyl-(Acyl carrier protein) reductase	Q	KOG0725	Reductases with broad range of substrate specificities
Capana00g003085	ABA2_ARATH Xanthoxin dehydrogenase OS=Arabidopsis thaliana GN=ABA2 PE=1 SV=1	ABA2	chloroplast	GO:0001101 response to acid chemical; GO:0006066 alcohol metabolic process; GO:0006082 organic acid metabolic process; GO:0006520 cellular amino acid metabolic process; GO:0006560 proline metabolic process; GO:0006561 proline biosynthetic process; GO:0006629 lipid metabolic process; GO:0006714 sesquiterpenoid metabolic process; GO:0006720 isoprenoid metabolic process; GO:0006721 terpenoid metabol…	GO:0005622 intracellular; GO:0005623 cell; GO:0005737 cytoplasm; GO:0005829 cytosol; GO:0044424 intracellular part; GO:0044444 cytoplasmic part; GO:0044464 cell part;	GO:0003824 catalytic activity; GO:0004022 alcohol dehydrogenase (NAD) activity; GO:0010301 xanthoxin dehydrogenase activity; GO:0016491 oxidoreductase activity; GO:0016614 oxidoreductase activity, acting on CH-OH group of donors; GO:0016616 oxidoreductase activity, acting on the CH-OH group of donors, NAD or NADP as acceptor;	K09841	ABA2; xanthoxin dehydrogenase [EC:1.1.1.288]	cann00906 Carotenoid biosynthesis; cann01100 Metabolic pathways; cann01110 Biosynthesis of secondary metabolites	PF13561	Enoyl-(Acyl carrier protein) reductase	Q	KOG0725	Reductases with broad range of substrate specificities
Capana00g003105	GSTX4_TOBAC Probable glutathione S-transferase OS=Nicotiana tabacum PE=2 SV=1	---	cytoplasm	GO:0006518 peptide metabolic process; GO:0006575 cellular modified amino acid metabolic process; GO:0006749 glutathione metabolic process; GO:0006790 sulfur compound metabolic process; GO:0006807 nitrogen compound metabolic process; GO:0008152 metabolic process; GO:0009056 catabolic process; GO:0009404 toxin metabolic process; GO:0009407 toxin catabolic process; GO:0009636 response to toxic subst…	GO:0005622 intracellular; GO:0005623 cell; GO:0005737 cytoplasm; GO:0044424 intracellular part; GO:0044464 cell part;	GO:0003824 catalytic activity; GO:0004364 glutathione transferase activity; GO:0016740 transferase activity; GO:0016765 transferase activity, transferring alkyl or aryl (other than methyl) groups;	K00799	GST, gst; glutathione S-transferase [EC:2.5.1.18]	cann00480 Glutathione metabolism; cann01100 Metabolic pathways	PF02798; PF13410	Glutathione S-transferase, N-terminal domain; Glutathione S-transferase, C-terminal domain	O	KOG0406	Glutathione S-transferase
Capana00g003111	GLO1_ARATH Peroxisomal (S)-2-hydroxy-acid oxidase GLO1 OS=Arabidopsis thaliana GN=GLO1 PE=1 SV=1	GLO1	cytoplasm	GO:0006950 response to stress; GO:0006952 defense response; GO:0008152 metabolic process; GO:0009058 biosynthetic process; GO:0009605 response to external stimulus; GO:0009607 response to biotic stimulus; GO:0009617 response to bacterium; GO:0009719 response to endogenous stimulus; GO:0009725 response to hormone; GO:0009735 response to cytokinin; GO:0009987 cellular process; GO:0010033 response t…	GO:0005576 extracellular region; GO:0005622 intracellular; GO:0005623 cell; GO:0005634 nucleus; GO:0005737 cytoplasm; GO:0005777 peroxisome; GO:0005829 cytosol; GO:0005840 ribosome; GO:0005911 cell-cell junction; GO:0009506 plasmodesma; GO:0009507 chloroplast; GO:0009532 plastid stroma; GO:0009536 plastid; GO:0009570 chloroplast stroma; GO:0016020 membrane; GO:0022626 cytosolic ribosome; GO:00300…	GO:0003824 catalytic activity; GO:0003973 (S)-2-hydroxy-acid oxidase activity; GO:0008891 glycolate oxidase activity; GO:0016491 oxidoreductase activity; GO:0016614 oxidoreductase activity, acting on CH-OH group of donors; GO:0016899 oxidoreductase activity, acting on the CH-OH group of donors, oxygen as acceptor;	K11517	HAO; (S)-2-hydroxy-acid oxidase [EC:1.1.3.15]	cann00630 Glyoxylate and dicarboxylate metabolism; cann01100 Metabolic pathways; cann01110 Biosynthesis of secondary metabolites; cann01200 Carbon metabolism; cann04146 Peroxisome	PF01070	FMN-dependent dehydrogenase	C	KOG0538	Glycolate oxidase
Capana00g003129	HEBP2_HUMAN Heme-binding protein 2 OS=Homo sapiens GN=HEBP2 PE=1 SV=1	HEBP2	extracellular
Capana00g003130	HEBP2_HUMAN Heme-binding protein 2 OS=Homo sapiens GN=HEBP2 PE=1 SV=1	HEBP2	extracellular
Capana00g003131	HEBP2_HUMAN Heme-binding protein 2 OS=Homo sapiens GN=HEBP2 PE=1 SV=1	HEBP2	extracellular
Capana00g003194	"DXS_CAPAN Probable 1-deoxy-D-xylulose-5-phosphate synthase, chloroplastic OS=Capsicum annuum GN=TKT2 PE=2 SV=1"	TKT2	chloroplast	GO:0006081 cellular aldehyde metabolic process; GO:0006082 organic acid metabolic process; GO:0006090 pyruvate metabolic process; GO:0006629 lipid metabolic process; GO:0006644 phospholipid metabolic process; GO:0006720 isoprenoid metabolic process; GO:0006725 cellular aromatic compound metabolic process; GO:0006778 porphyrin-containing compound metabolic process; GO:0006779 porphyrin-containing …	GO:0005622 intracellular; GO:0005623 cell; GO:0005737 cytoplasm; GO:0009507 chloroplast; GO:0009536 plastid; GO:0043226 organelle; GO:0043227 membrane-bounded organelle; GO:0043229 intracellular organelle; GO:0043231 intracellular membrane-bounded organelle; GO:0044424 intracellular part; GO:0044444 cytoplasmic part; GO:0044464 cell part;	GO:0003824 catalytic activity; GO:0008661 1-deoxy-D-xylulose-5-phosphate synthase activity; GO:0016740 transferase activity; GO:0016744 transferase activity, transferring aldehyde or ketonic groups;	K01662	dxs; 1-deoxy-D-xylulose-5-phosphate synthase [EC:2.2.1.7]	cann00730 Thiamine metabolism; cann00900 Terpenoid backbone biosynthesis; cann01100 Metabolic pathways; cann01110 Biosynthesis of secondary metabolites	PF02779; PF02780	Transketolase, pyrimidine binding domain; Transketolase, C-terminal domain	G	KOG0523	Transketolase
Capana00g003212	"ATP7_ARATH Probable ATP synthase 24 kDa subunit, mitochondrial OS=Arabidopsis thaliana GN=At2g21870 PE=1 SV=1"	At2g21870	mitochondria	GO:0007275 multicellular organism development; GO:0009555 pollen development; GO:0032501 multicellular organismal process; GO:0032502 developmental process; GO:0048229 gametophyte development; GO:0048856 anatomical structure development;	GO:0005622 intracellular; GO:0005623 cell; GO:0005634 nucleus; GO:0005730 nucleolus; GO:0005737 cytoplasm; GO:0005739 mitochondrion; GO:0005740 mitochondrial envelope; GO:0005743 mitochondrial inner membrane; GO:0005753 mitochondrial proton-transporting ATP synthase complex; GO:0009507 chloroplast; GO:0009536 plastid; GO:0016020 membrane; GO:0016469 proton-transporting two-sector ATPase complex; …	GO:0005488 binding; GO:0005507 copper ion binding; GO:0008270 zinc ion binding; GO:0043167 ion binding; GO:0043169 cation binding; GO:0046872 metal ion binding; GO:0046914 transition metal ion binding; GO:0050897 cobalt ion binding;
Capana00g003222	CHI5_ORYSJ Chitinase 5 OS=Oryza sativa subsp. japonica GN=Cht5 PE=2 SV=1	Cht5	extracellular	GO:0002376 immune system process; GO:0006950 response to stress; GO:0006952 defense response; GO:0006955 immune response; GO:0007275 multicellular organism development; GO:0007568 aging; GO:0009605 response to external stimulus; GO:0009607 response to biotic stimulus; GO:0009615 response to virus; GO:0009620 response to fungus; GO:0009627 systemic acquired resistance; GO:0009635 response to herbi…	GO:0005576 extracellular region; GO:0005618 cell wall; GO:0005623 cell; GO:0005886 plasma membrane; GO:0009505 plant-type cell wall; GO:0016020 membrane; GO:0030312 external encapsulating structure; GO:0044464 cell part; GO:0048046 apoplast; GO:0071944 cell periphery;		K01183	E3.2.1.14; chitinase [EC:3.2.1.14]	cann00520 Amino sugar and nucleotide sugar metabolism; cann01100 Metabolic pathways	PF00187; PF00182	Chitin recognition protein; Chitinase class I	S	KOG4742	Predicted chitinase
Capana00g003266	PME_ACTDE Pectinesterase OS=Actinidia deliciosa PE=1 SV=1	---	nucleus	GO:0006950 response to stress; GO:0006952 defense response; GO:0009605 response to external stimulus; GO:0009607 response to biotic stimulus; GO:0009617 response to bacterium; GO:0042742 defense response to bacterium; GO:0043086 negative regulation of catalytic activity; GO:0043207 response to external biotic stimulus; GO:0044092 negative regulation of molecular function; GO:0050790 regulation of…	GO:0005623 cell; GO:0044464 cell part; GO:0071944 cell periphery;	GO:0003824 catalytic activity; GO:0004857 enzyme inhibitor activity; GO:0016787 hydrolase activity; GO:0016788 hydrolase activity, acting on ester bonds; GO:0030234 enzyme regulator activity; GO:0030599 pectinesterase activity; GO:0046910 pectinesterase inhibitor activity; GO:0052689 carboxylic ester hydrolase activity; GO:0098772 molecular function regulator;	K01051	E3.1.1.11; pectinesterase [EC:3.1.1.11]	cann00040 Pentose and glucuronate interconversions; cann01100 Metabolic pathways	PF04043	Plant invertase/pectin methylesterase inhibitor
Capana00g003268	RL192_ARATH 60S ribosomal protein L19-2 OS=Arabidopsis thaliana GN=RPL19B PE=2 SV=1	RPL19B	cytoplasm	GO:0006412 translation; GO:0006518 peptide metabolic process; GO:0006807 nitrogen compound metabolic process; GO:0008152 metabolic process; GO:0009058 biosynthetic process; GO:0009059 macromolecule biosynthetic process; GO:0009987 cellular process; GO:0010467 gene expression; GO:0019538 protein metabolic process; GO:0034641 cellular nitrogen compound metabolic process; GO:0034645 cellular macromo…	GO:0005622 intracellular; GO:0005623 cell; GO:0005634 nucleus; GO:0005730 nucleolus; GO:0005737 cytoplasm; GO:0005829 cytosol; GO:0005840 ribosome; GO:0005844 polysome; GO:0005886 plasma membrane; GO:0005911 cell-cell junction; GO:0009506 plasmodesma; GO:0015934 large ribosomal subunit; GO:0016020 membrane; GO:0022625 cytosolic large ribosomal subunit; GO:0022626 cytosolic ribosome; GO:0030054 ce…	GO:0003676 nucleic acid binding; GO:0003723 RNA binding; GO:0003729 mRNA binding; GO:0003735 structural constituent of ribosome; GO:0005198 structural molecule activity; GO:0005488 binding; GO:0097159 organic cyclic compound binding; GO:1901363 heterocyclic compound binding;	K02885	RP-L19e, RPL19; large subunit ribosomal protein L19e	cann03010 Ribosome			J	KOG1696	60s ribosomal protein L19
Capana00g003269	"FUM2_ARATH Fumarate hydratase 2, chloroplastic OS=Arabidopsis thaliana GN=FUM2 PE=2 SV=1"	FUM2	cytoplasm	GO:0000003 reproduction; GO:0003006 developmental process involved in reproduction; GO:0006082 organic acid metabolic process; GO:0006091 generation of precursor metabolites and energy; GO:0006099 tricarboxylic acid cycle; GO:0006101 citrate metabolic process; GO:0006106 fumarate metabolic process; GO:0006108 malate metabolic process; GO:0006950 response to stress; GO:0006970 response to osmotic …	GO:0005622 intracellular; GO:0005623 cell; GO:0005737 cytoplasm; GO:0005739 mitochondrion; GO:0043226 organelle; GO:0043227 membrane-bounded organelle; GO:0043229 intracellular organelle; GO:0043231 intracellular membrane-bounded organelle; GO:0044424 intracellular part; GO:0044444 cytoplasmic part; GO:0044464 cell part;	GO:0003824 catalytic activity; GO:0004333 fumarate hydratase activity; GO:0016829 lyase activity; GO:0016835 carbon-oxygen lyase activity; GO:0016836 hydro-lyase activity;	K01679	E4.2.1.2B, fumC; fumarate hydratase, class II [EC:4.2.1.2]	cann00020 Citrate cycle (TCA cycle); cann00620 Pyruvate metabolism; cann01100 Metabolic pathways; cann01110 Biosynthesis of secondary metabolites; cann01200 Carbon metabolism	PF00206; PF10415	Lyase; Fumarase C C-terminus	C	KOG1317	Fumarase
Capana00g003275	DJB11_MOUSE DnaJ homolog subfamily B member 11 OS=Mus musculus GN=Dnajb11 PE=1 SV=1	Dnajb11	cytoplasm	GO:0002682 regulation of immune system process; GO:0002684 positive regulation of immune system process; GO:0009605 response to external stimulus; GO:0009607 response to biotic stimulus; GO:0031347 regulation of defense response; GO:0031349 positive regulation of defense response; GO:0035821 modification of morphology or physiology of other organism; GO:0043207 response to external biotic stimulu…	GO:0005622 intracellular; GO:0005623 cell; GO:0005737 cytoplasm; GO:0005783 endoplasmic reticulum; GO:0005788 endoplasmic reticulum lumen; GO:0005886 plasma membrane; GO:0012505 endomembrane system; GO:0016020 membrane; GO:0031974 membrane-enclosed lumen; GO:0032991 macromolecular complex; GO:0034663 endoplasmic reticulum chaperone complex; GO:0043226 organelle; GO:0043227 membrane-bounded organe…		K09517	DNAJB11; DnaJ homolog subfamily B member 11	cann04141 Protein processing in endoplasmic reticulum	PF00226; PF01556	DnaJ domain; DnaJ C terminal domain	O	KOG0713	Molecular chaperone (DnaJ superfamily)
Capana00g003291	"PP178_ARATH Pentatricopeptide repeat-containing protein At2g31400, chloroplastic OS=Arabidopsis thaliana GN=At2g31400 PE=2 SV=1"	At2g31400	plasma membrane							PF13620	Carboxypeptidase regulatory-like domain	O	KOG1948	Metalloproteinase-related collagenase pM5
Capana00g003295	GLNB_ARATH Nitrogen regulatory protein P-II homolog OS=Arabidopsis thaliana GN=GLB1 PE=1 SV=1	GLB1	chloroplast	GO:0000820 regulation of glutamine family amino acid metabolic process; GO:0000821 regulation of arginine metabolic process; GO:0006521 regulation of cellular amino acid metabolic process; GO:0006807 nitrogen compound metabolic process; GO:0008152 metabolic process; GO:0009058 biosynthetic process; GO:0009314 response to radiation; GO:0009416 response to light stimulus; GO:0009628 response to abi…	GO:0005622 intracellular; GO:0005623 cell; GO:0005737 cytoplasm; GO:0005829 cytosol; GO:0009507 chloroplast; GO:0009534 chloroplast thylakoid; GO:0009536 plastid; GO:0009579 thylakoid; GO:0031976 plastid thylakoid; GO:0031984 organelle subcompartment; GO:0043226 organelle; GO:0043227 membrane-bounded organelle; GO:0043229 intracellular organelle; GO:0043231 intracellular membrane-bounded organell…	GO:0000166 nucleotide binding; GO:0000287 magnesium ion binding; GO:0005488 binding; GO:0005524 ATP binding; GO:0008144 drug binding; GO:0010307 acetylglutamate kinase regulator activity; GO:0017076 purine nucleotide binding; GO:0019207 kinase regulator activity; GO:0030234 enzyme regulator activity; GO:0030554 adenyl nucleotide binding; GO:0032553 ribonucleotide binding; GO:0032555 purine ribonu…				PF00543	Nitrogen regulatory protein P-II
Capana00g003324	WHI3_YEAST Protein WHI3 OS=Saccharomyces cerevisiae (strain ATCC 204508 / S288c) GN=WHI3 PE=1 SV=1	WHI3	chloroplast	GO:0000375 RNA splicing, via transesterification reactions; GO:0000377 RNA splicing, via transesterification reactions with bulged adenosine as nucleophile; GO:0000398 mRNA splicing, via spliceosome; GO:0001932 regulation of protein phosphorylation; GO:0001934 positive regulation of protein phosphorylation; GO:0006139 nucleobase-containing compound metabolic process; GO:0006396 RNA processing; GO…	GO:0005622 intracellular; GO:0005623 cell; GO:0005634 nucleus; GO:0005654 nucleoplasm; GO:0005685 U1 snRNP; GO:0005737 cytoplasm; GO:0005829 cytosol; GO:0010494 cytoplasmic stress granule; GO:0030532 small nuclear ribonucleoprotein complex; GO:0031974 membrane-enclosed lumen; GO:0031981 nuclear lumen; GO:0032991 macromolecular complex; GO:0035770 ribonucleoprotein granule; GO:0036464 cytoplasmic …	GO:0003676 nucleic acid binding; GO:0003712 transcription cofactor activity; GO:0003713 transcription coactivator activity; GO:0003723 RNA binding; GO:0003727 single-stranded RNA binding; GO:0005488 binding; GO:0005515 protein binding; GO:0008143 poly(A) binding; GO:0017069 snRNA binding; GO:0030619 U1 snRNA binding; GO:0035613 RNA stem-loop binding; GO:0035614 snRNA stem-loop binding; GO:0042802…				PF00076	RNA recognition motif. (a.k.a. RRM, RBD, or RNP domain)
Capana00g003367	"THF1_SOLTU Protein THYLAKOID FORMATION1, chloroplastic OS=Solanum tuberosum GN=THF1 PE=2 SV=1"	THF1	chloroplast	GO:0006091 generation of precursor metabolites and energy; GO:0006605 protein targeting; GO:0006612 protein targeting to membrane; GO:0006725 cellular aromatic compound metabolic process; GO:0006778 porphyrin-containing compound metabolic process; GO:0006787 porphyrin-containing compound catabolic process; GO:0006807 nitrogen compound metabolic process; GO:0006810 transport; GO:0006886 intracellu…	GO:0005622 intracellular; GO:0005623 cell; GO:0005737 cytoplasm; GO:0009507 chloroplast; GO:0009526 plastid envelope; GO:0009527 plastid outer membrane; GO:0009528 plastid inner membrane; GO:0009532 plastid stroma; GO:0009534 chloroplast thylakoid; GO:0009535 chloroplast thylakoid membrane; GO:0009536 plastid; GO:0009570 chloroplast stroma; GO:0009579 thylakoid; GO:0009707 chloroplast outer membr…
Capana00g003379	"NDK4_ARATH Nucleoside diphosphate kinase IV, chloroplastic/mitochondrial OS=Arabidopsis thaliana GN=NDK4 PE=1 SV=2"	NDK4	mitochondria	GO:0006139 nucleobase-containing compound metabolic process; GO:0006165 nucleoside diphosphate phosphorylation; GO:0006725 cellular aromatic compound metabolic process; GO:0006753 nucleoside phosphate metabolic process; GO:0006793 phosphorus metabolic process; GO:0006796 phosphate-containing compound metabolic process; GO:0006807 nitrogen compound metabolic process; GO:0006950 response to stress;…	GO:0005622 intracellular; GO:0005623 cell; GO:0005737 cytoplasm; GO:0005739 mitochondrion; GO:0005740 mitochondrial envelope; GO:0005743 mitochondrial inner membrane; GO:0005758 mitochondrial intermembrane space; GO:0009507 chloroplast; GO:0009534 chloroplast thylakoid; GO:0009536 plastid; GO:0009543 chloroplast thylakoid lumen; GO:0009579 thylakoid; GO:0016020 membrane; GO:0019866 organelle inne…	GO:0003824 catalytic activity; GO:0004550 nucleoside diphosphate kinase activity; GO:0005488 binding; GO:0008270 zinc ion binding; GO:0016301 kinase activity; GO:0016740 transferase activity; GO:0016772 transferase activity, transferring phosphorus-containing groups; GO:0016776 phosphotransferase activity, phosphate group as acceptor; GO:0019205 nucleobase-containing compound kinase activity; GO:…	K00940	ndk, NME; nucleoside-diphosphate kinase [EC:2.7.4.6]	cann00230 Purine metabolism; cann00240 Pyrimidine metabolism; cann01100 Metabolic pathways; cann01110 Biosynthesis of secondary metabolites; cann04016 MAPK signaling pathway - plant	PF00334	Nucleoside diphosphate kinase	F	KOG0888	Nucleoside diphosphate kinase
Capana00g003382	"NAD(P)H-quinone oxidoreductase subunit S, chloroplastic"	---	nucleus	GO:0006091 generation of precursor metabolites and energy; GO:0008152 metabolic process; GO:0009767 photosynthetic electron transport chain; GO:0009987 cellular process; GO:0015979 photosynthesis; GO:0019684 photosynthesis, light reaction; GO:0022900 electron transport chain; GO:0044237 cellular metabolic process; GO:0055114 oxidation-reduction process;	GO:0005622 intracellular; GO:0005623 cell; GO:0005737 cytoplasm; GO:0009507 chloroplast; GO:0009534 chloroplast thylakoid; GO:0009535 chloroplast thylakoid membrane; GO:0009536 plastid; GO:0009579 thylakoid; GO:0010598 NAD(P)H dehydrogenase complex (plastoquinone); GO:0016020 membrane; GO:0031976 plastid thylakoid; GO:0031984 organelle subcompartment; GO:0032991 macromolecular complex; GO:0034357…		K00345
Capana00g003394	LACS4_ARATH Long chain acyl-CoA synthetase 4 OS=Arabidopsis thaliana GN=LACS4 PE=2 SV=1	LACS4	cytoplasm	GO:0001676 long-chain fatty acid metabolic process; GO:0006082 organic acid metabolic process; GO:0006629 lipid metabolic process; GO:0006631 fatty acid metabolic process; GO:0008152 metabolic process; GO:0009987 cellular process; GO:0019752 carboxylic acid metabolic process; GO:0032787 monocarboxylic acid metabolic process; GO:0043436 oxoacid metabolic process; GO:0044237 cellular metabolic proc…	GO:0005622 intracellular; GO:0005623 cell; GO:0005737 cytoplasm; GO:0005783 endoplasmic reticulum; GO:0005794 Golgi apparatus; GO:0005886 plasma membrane; GO:0012505 endomembrane system; GO:0016020 membrane; GO:0043226 organelle; GO:0043227 membrane-bounded organelle; GO:0043229 intracellular organelle; GO:0043231 intracellular membrane-bounded organelle; GO:0044424 intracellular part; GO:0044444…	GO:0003824 catalytic activity; GO:0004467 long-chain fatty acid-CoA ligase activity; GO:0015645 fatty acid ligase activity; GO:0016405 CoA-ligase activity; GO:0016874 ligase activity; GO:0016877 ligase activity, forming carbon-sulfur bonds; GO:0016878 acid-thiol ligase activity;	K01897	ACSL, fadD; long-chain acyl-CoA synthetase [EC:6.2.1.3]	cann00061 Fatty acid biosynthesis; cann00071 Fatty acid degradation; cann01100 Metabolic pathways; cann01212 Fatty acid metabolism; cann04146 Peroxisome			I	KOG1256	Long-chain acyl-CoA synthetases (AMP-forming)
Capana00g003486	URT1_FRAAN Putative UDP-rhamnose:rhamnosyltransferase 1 OS=Fragaria ananassa GN=GT4 PE=2 SV=1	GT4	chloroplast									CG	KOG1192	UDP-glucuronosyl and UDP-glucosyl transferase
Capana00g003500	ADK2_ARATH Adenosine kinase 2 OS=Arabidopsis thaliana GN=ADK2 PE=1 SV=1	ADK2	cytoplasm	GO:0006139 nucleobase-containing compound metabolic process; GO:0006163 purine nucleotide metabolic process; GO:0006164 purine nucleotide biosynthetic process; GO:0006166 purine ribonucleoside salvage; GO:0006167 AMP biosynthetic process; GO:0006169 adenosine salvage; GO:0006725 cellular aromatic compound metabolic process; GO:0006753 nucleoside phosphate metabolic process; GO:0006793 phosphorus …	GO:0005576 extracellular region; GO:0005622 intracellular; GO:0005623 cell; GO:0005634 nucleus; GO:0005737 cytoplasm; GO:0005829 cytosol; GO:0005886 plasma membrane; GO:0005911 cell-cell junction; GO:0009506 plasmodesma; GO:0009507 chloroplast; GO:0009536 plastid; GO:0016020 membrane; GO:0030054 cell junction; GO:0043226 organelle; GO:0043227 membrane-bounded organelle; GO:0043229 intracellular o…	GO:0003824 catalytic activity; GO:0004001 adenosine kinase activity; GO:0005488 binding; GO:0005507 copper ion binding; GO:0016301 kinase activity; GO:0016740 transferase activity; GO:0016772 transferase activity, transferring phosphorus-containing groups; GO:0016773 phosphotransferase activity, alcohol group as acceptor; GO:0019205 nucleobase-containing compound kinase activity; GO:0019206 nucle…	K00856	E2.7.1.20, ADK; adenosine kinase [EC:2.7.1.20]	cann00230 Purine metabolism; cann01100 Metabolic pathways			G	KOG2854	Possible pfkB family carbohydrate kinase
Capana00g003501	TSN_PONAB Translin OS=Pongo abelii GN=TSN PE=2 SV=1	TSN	cytoplasm		GO:0005622 intracellular; GO:0005623 cell; GO:0005634 nucleus; GO:0043226 organelle; GO:0043227 membrane-bounded organelle; GO:0043229 intracellular organelle; GO:0043231 intracellular membrane-bounded organelle; GO:0044424 intracellular part; GO:0044464 cell part;							S	KOG3067	Translin family protein
Capana00g003506	OPR1_SOLLC 12-oxophytodienoate reductase 1 OS=Solanum lycopersicum GN=OPR1 PE=1 SV=1	OPR1	cytoskeleton	GO:0006950 response to stress; GO:0008152 metabolic process; GO:0009611 response to wounding; GO:0050896 response to stimulus; GO:0055114 oxidation-reduction process;	GO:0005622 intracellular; GO:0005623 cell; GO:0044464 cell part;	GO:0003824 catalytic activity; GO:0016491 oxidoreductase activity; GO:0016627 oxidoreductase activity, acting on the CH-CH group of donors; GO:0016628 oxidoreductase activity, acting on the CH-CH group of donors, NAD or NADP as acceptor; GO:0016629 12-oxophytodienoate reductase activity;	K05894	OPR; 12-oxophytodienoic acid reductase [EC:1.3.1.42]	cann00592 alpha-Linolenic acid metabolism; cann01100 Metabolic pathways; cann01110 Biosynthesis of secondary metabolites	PF00724	NADH:flavin oxidoreductase / NADH oxidase family	C	KOG0134	NADH:flavin oxidoreductase/12-oxophytodienoate reductase
Capana00g003516	NH2L1_XENLA NHP2-like protein 1 OS=Xenopus laevis GN=nhp2l1 PE=2 SV=1	nhp2l1	chloroplast	GO:0000375 RNA splicing, via transesterification reactions; GO:0000377 RNA splicing, via transesterification reactions with bulged adenosine as nucleophile; GO:0000398 mRNA splicing, via spliceosome; GO:0006139 nucleobase-containing compound metabolic process; GO:0006396 RNA processing; GO:0006397 mRNA processing; GO:0006725 cellular aromatic compound metabolic process; GO:0006807 nitrogen compou…	GO:0005622 intracellular; GO:0005623 cell; GO:0005634 nucleus; GO:0005681 spliceosomal complex; GO:0005684 U2-type spliceosomal complex; GO:0005690 U4atac snRNP; GO:0030532 small nuclear ribonucleoprotein complex; GO:0032991 macromolecular complex; GO:0043226 organelle; GO:0043227 membrane-bounded organelle; GO:0043229 intracellular organelle; GO:0043231 intracellular membrane-bounded organelle; …	GO:0003676 nucleic acid binding; GO:0003723 RNA binding; GO:0005488 binding; GO:0017069 snRNA binding; GO:0030622 U4atac snRNA binding; GO:0097159 organic cyclic compound binding; GO:1901363 heterocyclic compound binding;	K12845	SNU13, NHP2L; U4/U6 small nuclear ribonucleoprotein SNU13	cann03008 Ribosome biogenesis in eukaryotes; cann03040 Spliceosome	PF01248	Ribosomal protein L7Ae/L30e/S12e/Gadd45 family	AJ	KOG3387	60S ribosomal protein 15.5kD/SNU13, NHP2/L7A family (includes ribonuclease P subunit p38), involved in splicing
Capana00g003527	SR542_SOLLC Signal recognition particle 54 kDa protein 2 OS=Solanum lycopersicum PE=2 SV=1	---	cytoplasm		GO:0005622 intracellular; GO:0005623 cell; GO:0005737 cytoplasm; GO:0005786 signal recognition particle, endoplasmic reticulum targeting; GO:0005829 cytosol; GO:0032991 macromolecular complex; GO:0044424 intracellular part; GO:0044444 cytoplasmic part; GO:0044464 cell part; GO:0048500 signal recognition particle; GO:1990904 ribonucleoprotein complex;		K03106	SRP54, ffh; signal recognition particle subunit SRP54 [EC:3.6.5.4]	cann03060 Protein export	PF02881; PF00448; PF02978	SRP54-type protein, helical bundle domain; SRP54-type protein, GTPase domain; Signal peptide binding domain	U	KOG0780	Signal recognition particle, subunit Srp54
Capana00g003536	14339_SOLLC 14-3-3 protein 9 OS=Solanum lycopersicum GN=TFT9 PE=2 SV=2	TFT9	cytoplasm				K06630	YWHAE; 14-3-3 protein epsilon		PF00244	14-3-3 protein	O	KOG0841	Multifunctional chaperone (14-3-3 family)
Capana00g003542	"ILV5_ARATH Ketol-acid reductoisomerase, chloroplastic OS=Arabidopsis thaliana GN=At3g58610 PE=2 SV=2"	At3g58610	chloroplast	GO:0010035 response to inorganic substance; GO:0010038 response to metal ion; GO:0042221 response to chemical; GO:0046686 response to cadmium ion; GO:0050896 response to stimulus;	GO:0005576 extracellular region; GO:0005618 cell wall; GO:0005622 intracellular; GO:0005623 cell; GO:0005737 cytoplasm; GO:0005739 mitochondrion; GO:0009507 chloroplast; GO:0009526 plastid envelope; GO:0009532 plastid stroma; GO:0009536 plastid; GO:0009570 chloroplast stroma; GO:0009941 chloroplast envelope; GO:0030312 external encapsulating structure; GO:0031967 organelle envelope; GO:0031975 en…	GO:0000166 nucleotide binding; GO:0000287 magnesium ion binding; GO:0005488 binding; GO:0005507 copper ion binding; GO:0005515 protein binding; GO:0036094 small molecule binding; GO:0042802 identical protein binding; GO:0042803 protein homodimerization activity; GO:0043167 ion binding; GO:0043168 anion binding; GO:0043169 cation binding; GO:0046872 metal ion binding; GO:0046914 transition metal i…	K00053	ilvC; ketol-acid reductoisomerase [EC:1.1.1.86]	cann00290 Valine, leucine and isoleucine biosynthesis; cann00770 Pantothenate and CoA biosynthesis; cann01100 Metabolic pathways; cann01110 Biosynthesis of secondary metabolites; cann01210 2-Oxocarboxylic acid metabolism; cann01230 Biosynthesis of amino acids
Capana00g003547	NECP1_HUMAN Adaptin ear-binding coat-associated protein 1 OS=Homo sapiens GN=NECAP1 PE=1 SV=2	NECAP1	nucleus	GO:0006810 transport; GO:0051179 localization; GO:0051234 establishment of localization; GO:0055085 transmembrane transport;		GO:0003824 catalytic activity; GO:0005215 transporter activity; GO:0015399 primary active transmembrane transporter activity; GO:0015405 P-P-bond-hydrolysis-driven transmembrane transporter activity; GO:0016462 pyrophosphatase activity; GO:0016787 hydrolase activity; GO:0016817 hydrolase activity, acting on acid anhydrides; GO:0016818 hydrolase activity, acting on acid anhydrides, in phosphorus-c…	K20069	NECAP1_2; adaptin ear-binding coat-associated protein 1/2				S	KOG2500	Uncharacterized conserved protein
Capana00g003557	BUP1_DICDI Beta-ureidopropionase OS=Dictyostelium discoideum GN=pyd3 PE=1 SV=1	pyd3	nucleus	GO:0006139 nucleobase-containing compound metabolic process; GO:0006206 pyrimidine nucleobase metabolic process; GO:0006208 pyrimidine nucleobase catabolic process; GO:0006212 uracil catabolic process; GO:0006725 cellular aromatic compound metabolic process; GO:0006807 nitrogen compound metabolic process; GO:0007154 cell communication; GO:0008152 metabolic process; GO:0009056 catabolic process; G…	GO:0005622 intracellular; GO:0005623 cell; GO:0005737 cytoplasm; GO:0005829 cytosol; GO:0044424 intracellular part; GO:0044444 cytoplasmic part; GO:0044464 cell part;	GO:0003824 catalytic activity; GO:0003837 beta-ureidopropionase activity; GO:0016787 hydrolase activity; GO:0016810 hydrolase activity, acting on carbon-nitrogen (but not peptide) bonds; GO:0016811 hydrolase activity, acting on carbon-nitrogen (but not peptide) bonds, in linear amides;	K01431	UPB1, pydC; beta-ureidopropionase [EC:3.5.1.6]	cann00240 Pyrimidine metabolism; cann00410 beta-Alanine metabolism; cann00770 Pantothenate and CoA biosynthesis; cann01100 Metabolic pathways			E	KOG0808	Carbon-nitrogen hydrolase
Capana00g003563	NUA_ARATH Nuclear-pore anchor OS=Arabidopsis thaliana GN=NUA PE=1 SV=1	NUA	nucleus	GO:0000003 reproduction; GO:0000075 cell cycle checkpoint; GO:0000278 mitotic cell cycle; GO:0003006 developmental process involved in reproduction; GO:0006403 RNA localization; GO:0006405 RNA export from nucleus; GO:0006406 mRNA export from nucleus; GO:0006611 protein export from nucleus; GO:0006810 transport; GO:0006886 intracellular protein transport; GO:0006913 nucleocytoplasmic transport; GO…	GO:0005622 intracellular; GO:0005623 cell; GO:0005634 nucleus; GO:0005635 nuclear envelope; GO:0005643 nuclear pore; GO:0005730 nucleolus; GO:0005737 cytoplasm; GO:0005829 cytosol; GO:0005911 cell-cell junction; GO:0009506 plasmodesma; GO:0009507 chloroplast; GO:0009536 plastid; GO:0012505 endomembrane system; GO:0030054 cell junction; GO:0031967 organelle envelope; GO:0031974 membrane-enclosed l…		K09291	TPR, MLP1, MLP2; nucleoprotein TPR	cann03013 RNA transport			S	KOG4674	Uncharacterized conserved coiled-coil protein
Capana00g003566	TAS_SHIFL Protein tas OS=Shigella flexneri GN=tas PE=3 SV=1	tas	chloroplast							PF00248	Aldo/keto reductase family	C	KOG1575	Voltage-gated shaker-like K+ channel, subunit beta/KCNAB
Capana00g003569	Y575_SYNY3 Thylakoid membrane protein slr0575 OS=Synechocystis sp. (strain PCC 6803 / Kazusa) GN=slr0575 PE=4 SV=1	slr0575	chloroplast
Capana00g003656	RL30_LUPLU 60S ribosomal protein L30 OS=Lupinus luteus GN=RPL30 PE=3 SV=1	RPL30	chloroplast	GO:0002181 cytoplasmic translation; GO:0006412 translation; GO:0006518 peptide metabolic process; GO:0006807 nitrogen compound metabolic process; GO:0008152 metabolic process; GO:0009058 biosynthetic process; GO:0009059 macromolecule biosynthetic process; GO:0009987 cellular process; GO:0010467 gene expression; GO:0019538 protein metabolic process; GO:0034641 cellular nitrogen compound metabolic …	GO:0005622 intracellular; GO:0005623 cell; GO:0005737 cytoplasm; GO:0005829 cytosol; GO:0005840 ribosome; GO:0015934 large ribosomal subunit; GO:0022625 cytosolic large ribosomal subunit; GO:0022626 cytosolic ribosome; GO:0032991 macromolecular complex; GO:0043226 organelle; GO:0043228 non-membrane-bounded organelle; GO:0043229 intracellular organelle; GO:0043232 intracellular non-membrane-bounde…	GO:0003676 nucleic acid binding; GO:0003723 RNA binding; GO:0003735 structural constituent of ribosome; GO:0005198 structural molecule activity; GO:0005488 binding; GO:0097159 organic cyclic compound binding; GO:1901363 heterocyclic compound binding;	K02908	RP-L30e, RPL30; large subunit ribosomal protein L30e	cann03010 Ribosome	PF01248	Ribosomal protein L7Ae/L30e/S12e/Gadd45 family	J	KOG2988	60S ribosomal protein L30
Capana00g003675	K0664_DROWI Protein KIAA0664 homolog OS=Drosophila willistoni GN=GK22132 PE=3 SV=1	GK22132	nucleus				K03255	TIF31, CLU1; protein TIF31				S	KOG1839	Uncharacterized protein CLU1/cluA/TIF31 involved in mitochondrial morphology/distribution, also found associated with eIF-3
Capana00g003691	Tetraspanin-8	---	plasma membrane
Capana00g003720	N-acetyltransferase domain-containing protein	---	chloroplast
Capana00g003764	ANM13_ARATH Probable histone-arginine methyltransferase 1.3 OS=Arabidopsis thaliana GN=PRMT13 PE=2 SV=3	PRMT13	endoplasmic reticulum	GO:0000003 reproduction; GO:0003006 developmental process involved in reproduction; GO:0006325 chromatin organization; GO:0006355 regulation of transcription, DNA-templated; GO:0006464 cellular protein modification process; GO:0006479 protein methylation; GO:0006807 nitrogen compound metabolic process; GO:0006950 response to stress; GO:0006970 response to osmotic stress; GO:0006996 organelle orga…	GO:0005622 intracellular; GO:0005623 cell; GO:0005634 nucleus; GO:0005737 cytoplasm; GO:0005829 cytosol; GO:0043226 organelle; GO:0043227 membrane-bounded organelle; GO:0043229 intracellular organelle; GO:0043231 intracellular membrane-bounded organelle; GO:0044424 intracellular part; GO:0044444 cytoplasmic part; GO:0044464 cell part;	GO:0003824 catalytic activity; GO:0005488 binding; GO:0005515 protein binding; GO:0008168 methyltransferase activity; GO:0008170 N-methyltransferase activity; GO:0008276 protein methyltransferase activity; GO:0008469 histone-arginine N-methyltransferase activity; GO:0008757 S-adenosylmethionine-dependent methyltransferase activity; GO:0016273 arginine N-methyltransferase activity; GO:0016274 prot…	K05931	CARM1, PRMT4; type I protein arginine methyltransferase [EC:2.1.1.319]				KO	KOG1500	Protein arginine N-methyltransferase CARM1
Capana00g003768	proteoglycan 4-like	---	chloroplast
Capana00g003783	RL6_MESCR 60S ribosomal protein L6 OS=Mesembryanthemum crystallinum GN=RPL6 PE=2 SV=1	RPL6	peroxisome				K02934	RP-L6e, RPL6; large subunit ribosomal protein L6e	cann03010 Ribosome	PF03868	Ribosomal protein L6, N-terminal domain	J	KOG1694	60s ribosomal protein L6
Capana00g003785	UGPA_SOLTU UTP--glucose-1-phosphate uridylyltransferase OS=Solanum tuberosum PE=1 SV=3	---	endoplasmic reticulum	GO:0005975 carbohydrate metabolic process; GO:0005976 polysaccharide metabolic process; GO:0005977 glycogen metabolic process; GO:0005984 disaccharide metabolic process; GO:0005985 sucrose metabolic process; GO:0006011 UDP-glucose metabolic process; GO:0006073 cellular glucan metabolic process; GO:0006091 generation of precursor metabolites and energy; GO:0006112 energy reserve metabolic process;…	GO:0005622 intracellular; GO:0005623 cell; GO:0005737 cytoplasm; GO:0005829 cytosol; GO:0005886 plasma membrane; GO:0016020 membrane; GO:0042995 cell projection; GO:0044424 intracellular part; GO:0044444 cytoplasmic part; GO:0044464 cell part; GO:0071944 cell periphery; GO:0090406 pollen tube;	GO:0003824 catalytic activity; GO:0003983 UTP:glucose-1-phosphate uridylyltransferase activity; GO:0016740 transferase activity; GO:0016772 transferase activity, transferring phosphorus-containing groups; GO:0016779 nucleotidyltransferase activity; GO:0051748 UTP-monosaccharide-1-phosphate uridylyltransferase activity; GO:0070569 uridylyltransferase activity;	K00963	UGP2, galU, galF; UTP--glucose-1-phosphate uridylyltransferase [EC:2.7.7.9]	cann00040 Pentose and glucuronate interconversions; cann00052 Galactose metabolism; cann00500 Starch and sucrose metabolism; cann00520 Amino sugar and nucleotide sugar metabolism; cann01100 Metabolic pathways			G	KOG2638	UDP-glucose pyrophosphorylase
Capana00g003818	TCPQ_DICDI T-complex protein 1 subunit theta OS=Dictyostelium discoideum GN=cct8 PE=3 SV=1	cct8	cytoplasm	GO:0006457 protein folding; GO:0006458 'de novo' protein folding; GO:0009987 cellular process; GO:0061077 chaperone-mediated protein folding;	GO:0005622 intracellular; GO:0005623 cell; GO:0005737 cytoplasm; GO:0005829 cytosol; GO:0005832 chaperonin-containing T-complex; GO:0032991 macromolecular complex; GO:0044424 intracellular part; GO:0044444 cytoplasmic part; GO:0044445 cytosolic part; GO:0044464 cell part; GO:0101031 chaperone complex;	GO:0005488 binding; GO:0005515 protein binding; GO:0044183 protein binding involved in protein folding; GO:0051082 unfolded protein binding;	K09500	CCT8; T-complex protein 1 subunit theta				O	KOG0362	Chaperonin complex component, TCP-1 theta subunit (CCT8)
Capana00g003850	"FK202_ARATH Peptidyl-prolyl cis-trans isomerase FKBP20-2, chloroplastic OS=Arabidopsis thaliana GN=FKBP20-2 PE=1 SV=1"	FKBP20-2	nucleus	GO:0000413 protein peptidyl-prolyl isomerization; GO:0006091 generation of precursor metabolites and energy; GO:0006457 protein folding; GO:0006464 cellular protein modification process; GO:0006807 nitrogen compound metabolic process; GO:0008152 metabolic process; GO:0009987 cellular process; GO:0010207 photosystem II assembly; GO:0015979 photosynthesis; GO:0016043 cellular component organization…	GO:0005622 intracellular; GO:0005623 cell; GO:0005737 cytoplasm; GO:0009507 chloroplast; GO:0009536 plastid; GO:0009579 thylakoid; GO:0031977 thylakoid lumen; GO:0043226 organelle; GO:0043227 membrane-bounded organelle; GO:0043229 intracellular organelle; GO:0043231 intracellular membrane-bounded organelle; GO:0044424 intracellular part; GO:0044436 thylakoid part; GO:0044444 cytoplasmic part; GO:…	GO:0003755 peptidyl-prolyl cis-trans isomerase activity; GO:0003824 catalytic activity; GO:0005488 binding; GO:0005527 macrolide binding; GO:0005528 FK506 binding; GO:0008144 drug binding; GO:0016491 oxidoreductase activity; GO:0016853 isomerase activity; GO:0016859 cis-trans isomerase activity; GO:0097159 organic cyclic compound binding; GO:1901363 heterocyclic compound binding;				PF00254	FKBP-type peptidyl-prolyl cis-trans isomerase
Capana00g003863	"GLUT1_ARATH Glutamate synthase 1 [NADH], chloroplastic OS=Arabidopsis thaliana GN=GLT1 PE=1 SV=2"	GLT1	chloroplast	GO:0006082 organic acid metabolic process; GO:0006520 cellular amino acid metabolic process; GO:0006536 glutamate metabolic process; GO:0006537 glutamate biosynthetic process; GO:0006541 glutamine metabolic process; GO:0006807 nitrogen compound metabolic process; GO:0008152 metabolic process; GO:0008652 cellular amino acid biosynthetic process; GO:0009058 biosynthetic process; GO:0009064 glutamin…	GO:0005622 intracellular; GO:0005623 cell; GO:0005737 cytoplasm; GO:0009507 chloroplast; GO:0009532 plastid stroma; GO:0009536 plastid; GO:0009570 chloroplast stroma; GO:0043226 organelle; GO:0043227 membrane-bounded organelle; GO:0043229 intracellular organelle; GO:0043231 intracellular membrane-bounded organelle; GO:0044422 organelle part; GO:0044424 intracellular part; GO:0044434 chloroplast p…	GO:0003824 catalytic activity; GO:0015930 glutamate synthase activity; GO:0016040 glutamate synthase (NADH) activity; GO:0016491 oxidoreductase activity; GO:0016638 oxidoreductase activity, acting on the CH-NH2 group of donors; GO:0016639 oxidoreductase activity, acting on the CH-NH2 group of donors, NAD or NADP as acceptor; GO:0045181 glutamate synthase activity, NAD(P)H as acceptor;	K00264	GLT1; glutamate synthase (NADPH/NADH) [EC:1.4.1.13 1.4.1.14]	cann00250 Alanine, aspartate and glutamate metabolism; cann00910 Nitrogen metabolism; cann01100 Metabolic pathways; cann01110 Biosynthesis of secondary metabolites; cann01230 Biosynthesis of amino acids	PF00310; PF04898; PF01645; PF07992	Glutamine amidotransferases class-II; Glutamate synthase central domain; Conserved region in glutamate synthase; Pyridine nucleotide-disulphide oxidoreductase	E	KOG0399	Glutamate synthase
Capana00g003958	EKIA_DICDI Probable ethanolamine kinase A OS=Dictyostelium discoideum GN=etnkA PE=3 SV=1	etnkA	cytoplasm	GO:0006629 lipid metabolic process; GO:0006644 phospholipid metabolic process; GO:0006793 phosphorus metabolic process; GO:0006796 phosphate-containing compound metabolic process; GO:0008152 metabolic process; GO:0008610 lipid biosynthetic process; GO:0008654 phospholipid biosynthetic process; GO:0009058 biosynthetic process; GO:0009987 cellular process; GO:0019637 organophosphate metabolic proce…	GO:0005623 cell; GO:0005886 plasma membrane; GO:0016020 membrane; GO:0044464 cell part; GO:0071944 cell periphery;		K00894	ETNK, EKI; ethanolamine kinase [EC:2.7.1.82]	cann00564 Glycerophospholipid metabolism; cann01100 Metabolic pathways			I	KOG4720	Ethanolamine kinase
Capana00g003977	"RR13_ARATH 30S ribosomal protein S13, chloroplastic OS=Arabidopsis thaliana GN=RPS13 PE=2 SV=1"	RPS13	chloroplast	GO:0006412 translation; GO:0006518 peptide metabolic process; GO:0006807 nitrogen compound metabolic process; GO:0008152 metabolic process; GO:0009058 biosynthetic process; GO:0009059 macromolecule biosynthetic process; GO:0009987 cellular process; GO:0010467 gene expression; GO:0019538 protein metabolic process; GO:0022613 ribonucleoprotein complex biogenesis; GO:0034641 cellular nitrogen compou…	GO:0005622 intracellular; GO:0005623 cell; GO:0005737 cytoplasm; GO:0005840 ribosome; GO:0009507 chloroplast; GO:0009526 plastid envelope; GO:0009532 plastid stroma; GO:0009536 plastid; GO:0009570 chloroplast stroma; GO:0009941 chloroplast envelope; GO:0015935 small ribosomal subunit; GO:0031967 organelle envelope; GO:0031975 envelope; GO:0032991 macromolecular complex; GO:0043226 organelle; GO:0…	GO:0003735 structural constituent of ribosome; GO:0005198 structural molecule activity;	K02952	RP-S13, rpsM; small subunit ribosomal protein S13	cann03010 Ribosome			J	KOG3311	Ribosomal protein S18
Capana00g004062	OLA1_CHICK Obg-like ATPase 1 OS=Gallus gallus GN=OLA1 PE=2 SV=1	OLA1	cytoskeleton		GO:0005622 intracellular; GO:0005623 cell; GO:0005737 cytoplasm; GO:0044424 intracellular part; GO:0044464 cell part;	GO:0003824 catalytic activity; GO:0016462 pyrophosphatase activity; GO:0016787 hydrolase activity; GO:0016817 hydrolase activity, acting on acid anhydrides; GO:0016818 hydrolase activity, acting on acid anhydrides, in phosphorus-containing anhydrides; GO:0016887 ATPase activity; GO:0017111 nucleoside-triphosphatase activity;	K19788	OLA1; obg-like ATPase 1		PF06071	Protein of unknown function (DUF933)	J	KOG1491	Predicted GTP-binding protein (ODN superfamily)
Capana00g004102	DHR12_BOVIN Dehydrogenase/reductase SDR family member 12 OS=Bos taurus GN=DHRS12 PE=2 SV=1	DHRS12	chloroplast				K11168	DHRS12; dehydrogenase/reductase SDR family member 12 [EC:1.1.-.-]		PF00106	short chain dehydrogenase	Q	KOG1208	Dehydrogenases with different specificities (related to short-chain alcohol dehydrogenases)
Capana00g004151	"THI41_VITVI Thiamine thiazole synthase 1, chloroplastic OS=Vitis vinifera GN=THI1-1 PE=3 SV=1"	THI1-1	chloroplast	GO:0006725 cellular aromatic compound metabolic process; GO:0006766 vitamin metabolic process; GO:0006767 water-soluble vitamin metabolic process; GO:0006772 thiamine metabolic process; GO:0006790 sulfur compound metabolic process; GO:0006807 nitrogen compound metabolic process; GO:0008152 metabolic process; GO:0009058 biosynthetic process; GO:0009110 vitamin biosynthetic process; GO:0009228 thia…	GO:0005622 intracellular; GO:0005623 cell; GO:0005737 cytoplasm; GO:0005829 cytosol; GO:0044424 intracellular part; GO:0044444 cytoplasmic part; GO:0044464 cell part;	GO:0005488 binding; GO:0005506 iron ion binding; GO:0043167 ion binding; GO:0043169 cation binding; GO:0046872 metal ion binding; GO:0046914 transition metal ion binding;	K03146	THI4, THI1; thiamine thiazole synthase	cann00730 Thiamine metabolism; cann01100 Metabolic pathways			H	KOG2960	Protein involved in thiamine biosynthesis and DNA damage tolerance
Capana00g004152	PME22_SOLLC Pectinesterase 2.2 OS=Solanum lycopersicum GN=PME2.2 PE=3 SV=1	PME2.2	chloroplast	GO:0009605 response to external stimulus; GO:0009607 response to biotic stimulus; GO:0009617 response to bacterium; GO:0043086 negative regulation of catalytic activity; GO:0043207 response to external biotic stimulus; GO:0044092 negative regulation of molecular function; GO:0050790 regulation of catalytic activity; GO:0050896 response to stimulus; GO:0051704 multi-organism process; GO:0051707 re…	GO:0005618 cell wall; GO:0005622 intracellular; GO:0005623 cell; GO:0005737 cytoplasm; GO:0005773 vacuole; GO:0005774 vacuolar membrane; GO:0005829 cytosol; GO:0016020 membrane; GO:0030312 external encapsulating structure; GO:0031090 organelle membrane; GO:0043226 organelle; GO:0043227 membrane-bounded organelle; GO:0043229 intracellular organelle; GO:0043231 intracellular membrane-bounded organe…	GO:0003824 catalytic activity; GO:0004857 enzyme inhibitor activity; GO:0016787 hydrolase activity; GO:0016788 hydrolase activity, acting on ester bonds; GO:0030234 enzyme regulator activity; GO:0030599 pectinesterase activity; GO:0046910 pectinesterase inhibitor activity; GO:0052689 carboxylic ester hydrolase activity; GO:0098772 molecular function regulator;	K01051	E3.1.1.11; pectinesterase [EC:3.1.1.11]	cann00040 Pentose and glucuronate interconversions; cann01100 Metabolic pathways	PF04043	Plant invertase/pectin methylesterase inhibitor
Capana00g004162	P2C55_ARATH Probable protein phosphatase 2C 55 OS=Arabidopsis thaliana GN=At4g16580 PE=2 SV=2	At4g16580	chloroplast				K17508	PTC7, PPTC7; protein phosphatase PTC7 [EC:3.1.3.16]				T	KOG1379	Serine/threonine protein phosphatase
Capana00g004285	IF4A3_NICPL Eukaryotic initiation factor 4A-3 OS=Nicotiana plumbaginifolia PE=2 SV=1	---	cytoplasm	GO:0001666 response to hypoxia; GO:0006139 nucleobase-containing compound metabolic process; GO:0006396 RNA processing; GO:0006725 cellular aromatic compound metabolic process; GO:0006807 nitrogen compound metabolic process; GO:0006950 response to stress; GO:0008152 metabolic process; GO:0008380 RNA splicing; GO:0009628 response to abiotic stimulus; GO:0009987 cellular process; GO:0010467 gene ex…	GO:0005622 intracellular; GO:0005623 cell; GO:0005634 nucleus; GO:0005654 nucleoplasm; GO:0005681 spliceosomal complex; GO:0005730 nucleolus; GO:0005737 cytoplasm; GO:0016020 membrane; GO:0016604 nuclear body; GO:0016607 nuclear speck; GO:0031974 membrane-enclosed lumen; GO:0031981 nuclear lumen; GO:0032991 macromolecular complex; GO:0035145 exon-exon junction complex; GO:0043226 organelle; GO:00…	GO:0003676 nucleic acid binding; GO:0003723 RNA binding; GO:0003724 RNA helicase activity; GO:0003729 mRNA binding; GO:0003824 catalytic activity; GO:0004004 ATP-dependent RNA helicase activity; GO:0004386 helicase activity; GO:0005488 binding; GO:0008026 ATP-dependent helicase activity; GO:0008186 RNA-dependent ATPase activity; GO:0016462 pyrophosphatase activity; GO:0016787 hydrolase activity; …	K13025	EIF4A3, FAL1; ATP-dependent RNA helicase [EC:3.6.4.13]	cann03013 RNA transport; cann03015 mRNA surveillance pathway; cann03040 Spliceosome	PF00270	DEAD/DEAH box helicase	A	KOG0328	Predicted ATP-dependent RNA helicase FAL1, involved in rRNA maturation, DEAD-box superfamily
Capana00g004292	"HIS8_TOBAC Histidinol-phosphate aminotransferase, chloroplastic OS=Nicotiana tabacum GN=HPA PE=2 SV=1"	HPA	cytoplasm	GO:0000105 histidine biosynthetic process; GO:0006082 organic acid metabolic process; GO:0006520 cellular amino acid metabolic process; GO:0006547 histidine metabolic process; GO:0006725 cellular aromatic compound metabolic process; GO:0006807 nitrogen compound metabolic process; GO:0008152 metabolic process; GO:0008652 cellular amino acid biosynthetic process; GO:0009058 biosynthetic process; GO…	GO:0005622 intracellular; GO:0005623 cell; GO:0005737 cytoplasm; GO:0009507 chloroplast; GO:0009532 plastid stroma; GO:0009536 plastid; GO:0009570 chloroplast stroma; GO:0043226 organelle; GO:0043227 membrane-bounded organelle; GO:0043229 intracellular organelle; GO:0043231 intracellular membrane-bounded organelle; GO:0044422 organelle part; GO:0044424 intracellular part; GO:0044434 chloroplast p…	GO:0003824 catalytic activity; GO:0004400 histidinol-phosphate transaminase activity; GO:0008483 transaminase activity; GO:0016740 transferase activity; GO:0016769 transferase activity, transferring nitrogenous groups;	K00817	hisC; histidinol-phosphate aminotransferase [EC:2.6.1.9]	cann00340 Histidine metabolism; cann00350 Tyrosine metabolism; cann00360 Phenylalanine metabolism; cann00400 Phenylalanine, tyrosine and tryptophan biosynthesis; cann00960 Tropane, piperidine and pyridine alkaloid biosynthesis; cann01100 Metabolic pathways; cann01110 Biosynthesis of secondary metabolites; cann01230 Biosynthesis of amino acids	PF00155	Aminotransferase class I and II	E	KOG0633	Histidinol phosphate aminotransferase
Capana00g004313	"FKB19_ARATH Peptidyl-prolyl cis-trans isomerase FKBP19, chloroplastic OS=Arabidopsis thaliana GN=FKBP19 PE=1 SV=1"	FKBP19	chloroplast				K00616	E2.2.1.2, talA, talB; transaldolase [EC:2.2.1.2]	cann00030 Pentose phosphate pathway; cann01100 Metabolic pathways; cann01110 Biosynthesis of secondary metabolites; cann01200 Carbon metabolism; cann01230 Biosynthesis of amino acids	PF00923; PF00254	Transaldolase; FKBP-type peptidyl-prolyl cis-trans isomerase	G	KOG2772	Transaldolase
Capana00g004323	"ATPBM_NICPL ATP synthase subunit beta, mitochondrial OS=Nicotiana plumbaginifolia GN=ATPB PE=1 SV=1"	ATPB	mitochondria				K02133	ATPeF1B, ATP5B, ATP2; F-type H+-transporting ATPase subunit beta [EC:3.6.3.14]	cann00190 Oxidative phosphorylation; cann01100 Metabolic pathways	PF02874; PF00006	ATP synthase alpha/beta family, beta-barrel domain; ATP synthase alpha/beta family, nucleotide-binding domain	C	KOG1350	F0F1-type ATP synthase, beta subunit
Capana00g004374	ARNA_SERP5 Bifunctional polymyxin resistance protein ArnA OS=Serratia proteamaculans (strain 568) GN=arnA PE=3 SV=1	arnA	cytoplasm	GO:0006139 nucleobase-containing compound metabolic process; GO:0006725 cellular aromatic compound metabolic process; GO:0006807 nitrogen compound metabolic process; GO:0008152 metabolic process; GO:0009058 biosynthetic process; GO:0009225 nucleotide-sugar metabolic process; GO:0009226 nucleotide-sugar biosynthetic process; GO:0009987 cellular process; GO:0018130 heterocycle biosynthetic process;…	GO:0005576 extracellular region; GO:0005622 intracellular; GO:0005623 cell; GO:0005737 cytoplasm; GO:0005829 cytosol; GO:0044424 intracellular part; GO:0044444 cytoplasmic part; GO:0044464 cell part; GO:0048046 apoplast;	GO:0000166 nucleotide binding; GO:0003824 catalytic activity; GO:0005488 binding; GO:0016829 lyase activity; GO:0016830 carbon-carbon lyase activity; GO:0016831 carboxy-lyase activity; GO:0036094 small molecule binding; GO:0048037 cofactor binding; GO:0048040 UDP-glucuronate decarboxylase activity; GO:0050662 coenzyme binding; GO:0051287 NAD binding; GO:0097159 organic cyclic compound binding; GO…	K12449	AXS; UDP-apiose/xylose synthase	cann00520 Amino sugar and nucleotide sugar metabolism; cann01100 Metabolic pathways			GM	KOG1429	dTDP-glucose 4-6-dehydratase/UDP-glucuronic acid decarboxylase
Capana00g004429	"ODO2B_ARATH Dihydrolipoyllysine-residue succinyltransferase component of 2-oxoglutarate dehydrogenase complex 2, mitochondrial OS=Arabidopsis thaliana GN=At4g26910 PE=1 SV=2"	At4g26910	cytoplasm	GO:0006950 response to stress; GO:0006979 response to oxidative stress; GO:0050896 response to stimulus;	GO:0005622 intracellular; GO:0005623 cell; GO:0005737 cytoplasm; GO:0005739 mitochondrion; GO:0005829 cytosol; GO:0005840 ribosome; GO:0016020 membrane; GO:0022626 cytosolic ribosome; GO:0032991 macromolecular complex; GO:0043226 organelle; GO:0043227 membrane-bounded organelle; GO:0043228 non-membrane-bounded organelle; GO:0043229 intracellular organelle; GO:0043231 intracellular membrane-bounde…	GO:0005488 binding; GO:0008270 zinc ion binding; GO:0043167 ion binding; GO:0043169 cation binding; GO:0046872 metal ion binding; GO:0046914 transition metal ion binding;	K00658	DLST, sucB; 2-oxoglutarate dehydrogenase E2 component (dihydrolipoamide succinyltransferase) [EC:2.3.1.61]	cann00020 Citrate cycle (TCA cycle); cann00310 Lysine degradation; cann00380 Tryptophan metabolism; cann01100 Metabolic pathways; cann01110 Biosynthesis of secondary metabolites; cann01200 Carbon metabolism	PF00364; PF00198	Biotin-requiring enzyme; 2-oxoacid dehydrogenases acyltransferase (catalytic domain)	C	KOG0559	Dihydrolipoamide succinyltransferase (2-oxoglutarate dehydrogenase, E2 subunit)
Capana00g004435	FBK67_ARATH F-box/kelch-repeat protein At3g23880 OS=Arabidopsis thaliana GN=At3g23880 PE=2 SV=1	At3g23880	cytoplasm							PF00646	F-box domain
Capana00g004496	PSA4_PETHY Proteasome subunit alpha type-4 OS=Petunia hybrida GN=PAC1 PE=2 SV=1	PAC1	chloroplast	GO:0010035 response to inorganic substance; GO:0010038 response to metal ion; GO:0042221 response to chemical; GO:0046686 response to cadmium ion; GO:0050896 response to stimulus;	GO:0000502 proteasome complex; GO:0005622 intracellular; GO:0005623 cell; GO:0005737 cytoplasm; GO:0005773 vacuole; GO:0005829 cytosol; GO:0005839 proteasome core complex; GO:0005840 ribosome; GO:0019773 proteasome core complex, alpha-subunit complex; GO:0022626 cytosolic ribosome; GO:0032991 macromolecular complex; GO:0043226 organelle; GO:0043227 membrane-bounded organelle; GO:0043228 non-membr…		K02728	PSMA4; 20S proteasome subunit alpha 3 [EC:3.4.25.1]	cann03050 Proteasome	PF10584; PF00227	Proteasome subunit A N-terminal signature; Proteasome subunit	O	KOG0178	20S proteasome, regulatory subunit alpha type PSMA4/PRE9
Capana00g004516	"ADT2_SOLTU ADP,ATP carrier protein, mitochondrial (Fragment) OS=Solanum tuberosum GN=ANT1 PE=2 SV=1"	ANT1	chloroplast		GO:0005622 intracellular; GO:0005623 cell; GO:0005737 cytoplasm; GO:0005739 mitochondrion; GO:0005740 mitochondrial envelope; GO:0005743 mitochondrial inner membrane; GO:0016020 membrane; GO:0019866 organelle inner membrane; GO:0031090 organelle membrane; GO:0031966 mitochondrial membrane; GO:0031967 organelle envelope; GO:0031975 envelope; GO:0043226 organelle; GO:0043227 membrane-bounded organe…		K05863	SLC25A4S, ANT; solute carrier family 25 (mitochondrial adenine nucleotide translocator), member 4/5/6/31				C	KOG0749	Mitochondrial ADP/ATP carrier proteins
Capana00g004559	PRP6_MOUSE Pre-mRNA-processing factor 6 OS=Mus musculus GN=Prpf6 PE=2 SV=1	Prpf6	cytoplasm	GO:0000244 spliceosomal tri-snRNP complex assembly; GO:0000375 RNA splicing, via transesterification reactions; GO:0000377 RNA splicing, via transesterification reactions with bulged adenosine as nucleophile; GO:0000387 spliceosomal snRNP assembly; GO:0000398 mRNA splicing, via spliceosome; GO:0006139 nucleobase-containing compound metabolic process; GO:0006259 DNA metabolic process; GO:0006304 D…	GO:0005622 intracellular; GO:0005623 cell; GO:0005634 nucleus; GO:0005654 nucleoplasm; GO:0005681 spliceosomal complex; GO:0005682 U5 snRNP; GO:0005684 U2-type spliceosomal complex; GO:0015030 Cajal body; GO:0016604 nuclear body; GO:0016607 nuclear speck; GO:0030532 small nuclear ribonucleoprotein complex; GO:0031974 membrane-enclosed lumen; GO:0031981 nuclear lumen; GO:0032991 macromolecular com…	GO:0003676 nucleic acid binding; GO:0003712 transcription cofactor activity; GO:0003713 transcription coactivator activity; GO:0003723 RNA binding; GO:0005102 receptor binding; GO:0005488 binding; GO:0005515 protein binding; GO:0008134 transcription factor binding; GO:0035257 nuclear hormone receptor binding; GO:0035258 steroid hormone receptor binding; GO:0043021 ribonucleoprotein complex bindin…	K12855	PRPF6, PRP6; pre-mRNA-processing factor 6	cann03040 Spliceosome	PF00240; PF06424	Ubiquitin family; PRP1 splicing factor, N-terminal	A	KOG0495	HAT repeat protein
Capana00g004560	"POR_DAUCA Protochlorophyllide reductase, chloroplastic OS=Daucus carota GN=POR1 PE=2 SV=1"	POR1	chloroplast	GO:0008152 metabolic process; GO:0055114 oxidation-reduction process;	GO:0005622 intracellular; GO:0005623 cell; GO:0005737 cytoplasm; GO:0009507 chloroplast; GO:0009526 plastid envelope; GO:0009534 chloroplast thylakoid; GO:0009535 chloroplast thylakoid membrane; GO:0009536 plastid; GO:0009579 thylakoid; GO:0009941 chloroplast envelope; GO:0016020 membrane; GO:0031967 organelle envelope; GO:0031975 envelope; GO:0031976 plastid thylakoid; GO:0031984 organelle subco…	GO:0003824 catalytic activity; GO:0003959 NADPH dehydrogenase activity; GO:0016491 oxidoreductase activity; GO:0016651 oxidoreductase activity, acting on NAD(P)H;	K00218	por; protochlorophyllide reductase [EC:1.3.1.33]	cann00860 Porphyrin and chlorophyll metabolism; cann01100 Metabolic pathways; cann01110 Biosynthesis of secondary metabolites	PF00106	short chain dehydrogenase	Q	KOG1208	Dehydrogenases with different specificities (related to short-chain alcohol dehydrogenases)
Capana00g004571	"Y1360_ARATH Thylakoid lumenal protein At1g03610, chloroplastic OS=Arabidopsis thaliana GN=At1g03600 PE=1 SV=1"	At1g03600	chloroplast	GO:0006091 generation of precursor metabolites and energy; GO:0006807 nitrogen compound metabolic process; GO:0008152 metabolic process; GO:0009314 response to radiation; GO:0009416 response to light stimulus; GO:0009628 response to abiotic stimulus; GO:0009642 response to light intensity; GO:0009765 photosynthesis, light harvesting; GO:0009987 cellular process; GO:0010206 photosystem II repair; …	GO:0005622 intracellular; GO:0005623 cell; GO:0005737 cytoplasm; GO:0009507 chloroplast; GO:0009534 chloroplast thylakoid; GO:0009535 chloroplast thylakoid membrane; GO:0009536 plastid; GO:0009543 chloroplast thylakoid lumen; GO:0009579 thylakoid; GO:0016020 membrane; GO:0031976 plastid thylakoid; GO:0031977 thylakoid lumen; GO:0031978 plastid thylakoid lumen; GO:0031984 organelle subcompartment;…		K08902	psb27; photosystem II Psb27 protein	cann00195 Photosynthesis
Capana00g004656	PEAM1_ARATH Phosphoethanolamine N-methyltransferase 1 OS=Arabidopsis thaliana GN=NMT1 PE=2 SV=1	NMT1	nucleus	GO:0000003 reproduction; GO:0000902 cell morphogenesis; GO:0000904 cell morphogenesis involved in differentiation; GO:0001505 regulation of neurotransmitter levels; GO:0003006 developmental process involved in reproduction; GO:0006576 cellular biogenic amine metabolic process; GO:0006629 lipid metabolic process; GO:0006644 phospholipid metabolic process; GO:0006650 glycerophospholipid metabolic p…	GO:0005622 intracellular; GO:0005623 cell; GO:0005737 cytoplasm; GO:0005829 cytosol; GO:0044424 intracellular part; GO:0044444 cytoplasmic part; GO:0044464 cell part;	GO:0003824 catalytic activity; GO:0008168 methyltransferase activity; GO:0008170 N-methyltransferase activity; GO:0008757 S-adenosylmethionine-dependent methyltransferase activity; GO:0016740 transferase activity; GO:0016741 transferase activity, transferring one-carbon groups; GO:0052667 phosphomethylethanolamine N-methyltransferase activity;	K05929	E2.1.1.103, NMT; phosphoethanolamine N-methyltransferase [EC:2.1.1.103]	cann00564 Glycerophospholipid metabolism	PF08241; PF13649	Methyltransferase domain; Methyltransferase domain	I	KOG1269	SAM-dependent methyltransferases
Capana00g004663	GBLP_NICPL Guanine nucleotide-binding protein subunit beta-like protein OS=Nicotiana plumbaginifolia PE=2 SV=1	---	chloroplast	GO:0001101 response to acid chemical; GO:0001932 regulation of protein phosphorylation; GO:0001934 positive regulation of protein phosphorylation; GO:0006417 regulation of translation; GO:0006950 response to stress; GO:0006952 defense response; GO:0007275 multicellular organism development; GO:0009605 response to external stimulus; GO:0009607 response to biotic stimulus; GO:0009620 response to fu…	GO:0005622 intracellular; GO:0005623 cell; GO:0005634 nucleus; GO:0005730 nucleolus; GO:0005737 cytoplasm; GO:0005829 cytosol; GO:0005840 ribosome; GO:0005844 polysome; GO:0005886 plasma membrane; GO:0016020 membrane; GO:0022626 cytosolic ribosome; GO:0031974 membrane-enclosed lumen; GO:0031981 nuclear lumen; GO:0032991 macromolecular complex; GO:0042788 polysomal ribosome; GO:0043226 organelle; …	GO:0003735 structural constituent of ribosome; GO:0005078 MAP-kinase scaffold activity; GO:0005198 structural molecule activity; GO:0005488 binding; GO:0005515 protein binding; GO:0019899 enzyme binding; GO:0019900 kinase binding; GO:0032947 protein complex scaffold; GO:0035591 signaling adaptor activity; GO:0060090 binding, bridging;	K14753	RACK1; guanine nucleotide-binding protein subunit beta-2-like 1 protein				T	KOG0279	G protein beta subunit-like protein
Capana00g004678	2AAB_ARATH Serine/threonine-protein phosphatase 2A 65 kDa regulatory subunit A beta isoform OS=Arabidopsis thaliana GN=PP2AA2 PE=1 SV=2	PP2AA2	chloroplast				K03456	PPP2R1; serine/threonine-protein phosphatase 2A regulatory subunit A	cann03015 mRNA surveillance pathway			T	KOG0211	Protein phosphatase 2A regulatory subunit A and related proteins
Capana00g004704	GEK1_ARATH D-aminoacyl-tRNA deacylase OS=Arabidopsis thaliana GN=GEK1 PE=1 SV=2	GEK1	cytoplasm				K09716	dtdA, GEK1; D-aminoacyl-tRNA deacylase [EC:3.1.1.96]
Capana00g004716	GLPQ_ECOLI Glycerophosphoryl diester phosphodiesterase OS=Escherichia coli (strain K12) GN=glpQ PE=1 SV=2	glpQ	chloroplast		GO:0005622 intracellular; GO:0005623 cell; GO:0005737 cytoplasm; GO:0005773 vacuole; GO:0042597 periplasmic space; GO:0043226 organelle; GO:0043227 membrane-bounded organelle; GO:0043229 intracellular organelle; GO:0043231 intracellular membrane-bounded organelle; GO:0044424 intracellular part; GO:0044444 cytoplasmic part; GO:0044464 cell part;	GO:0003824 catalytic activity; GO:0005488 binding; GO:0005509 calcium ion binding; GO:0008081 phosphoric diester hydrolase activity; GO:0008889 glycerophosphodiester phosphodiesterase activity; GO:0016787 hydrolase activity; GO:0016788 hydrolase activity, acting on ester bonds; GO:0042578 phosphoric ester hydrolase activity; GO:0043167 ion binding; GO:0043169 cation binding; GO:0046872 metal ion …	K01126	E3.1.4.46, glpQ, ugpQ; glycerophosphoryl diester phosphodiesterase [EC:3.1.4.46]	cann00564 Glycerophospholipid metabolism			C	KOG2258	Glycerophosphoryl diester phosphodiesterase
Capana00g004749	ZB14_MAIZE 14 kDa zinc-binding protein OS=Zea mays GN=ZBP14 PE=1 SV=1	ZBP14	cytoplasm	GO:0006139 nucleobase-containing compound metabolic process; GO:0006163 purine nucleotide metabolic process; GO:0006725 cellular aromatic compound metabolic process; GO:0006753 nucleoside phosphate metabolic process; GO:0006790 sulfur compound metabolic process; GO:0006793 phosphorus metabolic process; GO:0006796 phosphate-containing compound metabolic process; GO:0006807 nitrogen compound metabo…	GO:0005622 intracellular; GO:0005623 cell; GO:0005737 cytoplasm; GO:0005777 peroxisome; GO:0005886 plasma membrane; GO:0016020 membrane; GO:0042579 microbody; GO:0043226 organelle; GO:0043227 membrane-bounded organelle; GO:0043229 intracellular organelle; GO:0043231 intracellular membrane-bounded organelle; GO:0044424 intracellular part; GO:0044444 cytoplasmic part; GO:0044464 cell part; GO:00719…	GO:0003824 catalytic activity; GO:0016787 hydrolase activity; GO:0016817 hydrolase activity, acting on acid anhydrides; GO:0016819 hydrolase activity, acting on acid anhydrides, in sulfonyl-containing anhydrides; GO:0047627 adenylylsulfatase activity;				PF01230	HIT domain	T	KOG3275	Zinc-binding protein of the histidine triad (HIT) family
Capana00g004765	NCB5R_NEOFI NADH-cytochrome b5 reductase 1 OS=Neosartorya fischeri (strain ATCC 1020 / DSM 3700 / FGSC A1164 / NRRL 181) GN=cbr1 PE=3 SV=2	cbr1	chloroplast	GO:0006091 generation of precursor metabolites and energy; GO:0008152 metabolic process; GO:0009987 cellular process; GO:0022900 electron transport chain; GO:0044237 cellular metabolic process; GO:0055114 oxidation-reduction process;	GO:0005618 cell wall; GO:0005622 intracellular; GO:0005623 cell; GO:0005737 cytoplasm; GO:0005783 endoplasmic reticulum; GO:0005886 plasma membrane; GO:0009505 plant-type cell wall; GO:0012505 endomembrane system; GO:0016020 membrane; GO:0030312 external encapsulating structure; GO:0043226 organelle; GO:0043227 membrane-bounded organelle; GO:0043229 intracellular organelle; GO:0043231 intracellul…	GO:0003824 catalytic activity; GO:0004128 cytochrome-b5 reductase activity, acting on NAD(P)H; GO:0016491 oxidoreductase activity; GO:0016651 oxidoreductase activity, acting on NAD(P)H; GO:0016653 oxidoreductase activity, acting on NAD(P)H, heme protein as acceptor;	K00326	E1.6.2.2; cytochrome-b5 reductase [EC:1.6.2.2]	cann00520 Amino sugar and nucleotide sugar metabolism	PF00970; PF00175	Oxidoreductase FAD-binding domain; Oxidoreductase NAD-binding domain	CH	KOG0534	NADH-cytochrome b-5 reductase
Capana00g004772	METE_CATRO 5-methyltetrahydropteroyltriglutamate--homocysteine methyltransferase OS=Catharanthus roseus GN=METE PE=2 SV=1	METE	cytoplasm				K00549	metE; 5-methyltetrahydropteroyltriglutamate--homocysteine methyltransferase [EC:2.1.1.14]	cann00270 Cysteine and methionine metabolism; cann00450 Selenocompound metabolism; cann01100 Metabolic pathways; cann01110 Biosynthesis of secondary metabolites; cann01230 Biosynthesis of amino acids	PF08267; PF01717	Cobalamin-independent synthase, N-terminal domain; Cobalamin-independent synthase, Catalytic domain	E	KOG2263	Methionine synthase II (cobalamin-independent)
Capana00g004785	UBP12_ARATH Ubiquitin carboxyl-terminal hydrolase 12 OS=Arabidopsis thaliana GN=UBP12 PE=1 SV=2	UBP12	cytoplasm	GO:0001101 response to acid chemical; GO:0006508 proteolysis; GO:0006807 nitrogen compound metabolic process; GO:0007154 cell communication; GO:0007165 signal transduction; GO:0008152 metabolic process; GO:0009719 response to endogenous stimulus; GO:0009725 response to hormone; GO:0009753 response to jasmonic acid; GO:0009755 hormone-mediated signaling pathway; GO:0009867 jasmonic acid mediated s…	GO:0005622 intracellular; GO:0005623 cell; GO:0005634 nucleus; GO:0005737 cytoplasm; GO:0005829 cytosol; GO:0005911 cell-cell junction; GO:0009506 plasmodesma; GO:0030054 cell junction; GO:0043226 organelle; GO:0043227 membrane-bounded organelle; GO:0043229 intracellular organelle; GO:0043231 intracellular membrane-bounded organelle; GO:0044424 intracellular part; GO:0044444 cytoplasmic part; GO:…	GO:0003824 catalytic activity; GO:0004843 thiol-dependent ubiquitin-specific protease activity; GO:0008233 peptidase activity; GO:0008234 cysteine-type peptidase activity; GO:0016787 hydrolase activity; GO:0019783 ubiquitin-like protein-specific protease activity; GO:0036459 thiol-dependent ubiquitinyl hydrolase activity; GO:0070011 peptidase activity, acting on L-amino acid peptides; GO:0101005 …	K11838	USP7, UBP15; ubiquitin carboxyl-terminal hydrolase 7 [EC:3.4.19.12]				O	KOG1863	Ubiquitin carboxyl-terminal hydrolase
Capana00g004800	CDPK3_ARATH Calcium-dependent protein kinase 3 OS=Arabidopsis thaliana GN=CPK3 PE=1 SV=1	CPK3	chloroplast	GO:0001101 response to acid chemical; GO:0006464 cellular protein modification process; GO:0006468 protein phosphorylation; GO:0006793 phosphorus metabolic process; GO:0006796 phosphate-containing compound metabolic process; GO:0006807 nitrogen compound metabolic process; GO:0007154 cell communication; GO:0007165 signal transduction; GO:0008152 metabolic process; GO:0009719 response to endogenous…	GO:0005622 intracellular; GO:0005623 cell; GO:0005634 nucleus; GO:0005737 cytoplasm; GO:0043226 organelle; GO:0043227 membrane-bounded organelle; GO:0043229 intracellular organelle; GO:0043231 intracellular membrane-bounded organelle; GO:0044424 intracellular part; GO:0044464 cell part;	GO:0003824 catalytic activity; GO:0004672 protein kinase activity; GO:0004674 protein serine/threonine kinase activity; GO:0004683 calmodulin-dependent protein kinase activity; GO:0005488 binding; GO:0005515 protein binding; GO:0005516 calmodulin binding; GO:0009931 calcium-dependent protein serine/threonine kinase activity; GO:0010857 calcium-dependent protein kinase activity; GO:0016301 kinase …	K13412	CPK; calcium-dependent protein kinase [EC:2.7.11.1]	cann04626 Plant-pathogen interaction	PF00069	Protein kinase domain	T	KOG0032	Ca2+/calmodulin-dependent protein kinase, EF-Hand protein superfamily
Capana00g004805	"CRTSO_SOLLC Prolycopene isomerase, chloroplastic OS=Solanum lycopersicum GN=CRTISO PE=1 SV=1"	CRTISO	chloroplast	GO:0006996 organelle organization; GO:0008152 metabolic process; GO:0009657 plastid organization; GO:0009662 etioplast organization; GO:0009987 cellular process; GO:0016043 cellular component organization; GO:0055114 oxidation-reduction process; GO:0071840 cellular component organization or biogenesis;	GO:0005622 intracellular; GO:0005623 cell; GO:0044464 cell part;	GO:0003824 catalytic activity; GO:0016491 oxidoreductase activity; GO:0016853 isomerase activity; GO:0016859 cis-trans isomerase activity; GO:0046608 carotenoid isomerase activity;	K09835	crtISO, crtH; prolycopene isomerase [EC:5.2.1.13]	cann00906 Carotenoid biosynthesis; cann01100 Metabolic pathways; cann01110 Biosynthesis of secondary metabolites			H	KOG4254	Phytoene desaturase
Capana00g004833	Expp1 protein	---	chloroplast
Capana00g004910	Putative pyridoxamine 5'-phosphate oxidase family protein-like	---	chloroplast							PF13883	Pyridoxamine 5'-phosphate oxidase
Capana00g004931	PRS7A_ARATH 26S protease regulatory subunit 7 homolog A OS=Arabidopsis thaliana GN=RPT1A PE=2 SV=1	RPT1A	cytoskeleton	GO:0006355 regulation of transcription, DNA-templated; GO:0006357 regulation of transcription from RNA polymerase II promoter; GO:0006508 proteolysis; GO:0006511 ubiquitin-dependent protein catabolic process; GO:0006807 nitrogen compound metabolic process; GO:0006950 response to stress; GO:0008152 metabolic process; GO:0009056 catabolic process; GO:0009057 macromolecule catabolic process; GO:0009…	GO:0000502 proteasome complex; GO:0005622 intracellular; GO:0005623 cell; GO:0005634 nucleus; GO:0005737 cytoplasm; GO:0005829 cytosol; GO:0005886 plasma membrane; GO:0016020 membrane; GO:0031595 nuclear proteasome complex; GO:0031597 cytosolic proteasome complex; GO:0031974 membrane-enclosed lumen; GO:0031981 nuclear lumen; GO:0032991 macromolecular complex; GO:0043226 organelle; GO:0043227 memb…	GO:0003824 catalytic activity; GO:0005488 binding; GO:0005515 protein binding; GO:0008134 transcription factor binding; GO:0016462 pyrophosphatase activity; GO:0016787 hydrolase activity; GO:0016817 hydrolase activity, acting on acid anhydrides; GO:0016818 hydrolase activity, acting on acid anhydrides, in phosphorus-containing anhydrides; GO:0016887 ATPase activity; GO:0017025 TBP-class protein b…	K03061	PSMC2, RPT1; 26S proteasome regulatory subunit T1	cann03050 Proteasome	PF00004	ATPase family associated with various cellular activities (AAA)	O	KOG0729	26S proteasome regulatory complex, ATPase RPT1
Capana00g004936	CLAH1_ARATH Clathrin heavy chain 1 OS=Arabidopsis thaliana GN=CHC1 PE=1 SV=1	CHC1	cytoplasm	GO:0006810 transport; GO:0006897 endocytosis; GO:0006898 receptor-mediated endocytosis; GO:0009987 cellular process; GO:0010118 stomatal movement; GO:0016192 vesicle-mediated transport; GO:0051179 localization; GO:0051234 establishment of localization; GO:0072583 clathrin-dependent endocytosis; GO:0098657 import into cell;	GO:0005622 intracellular; GO:0005623 cell; GO:0005737 cytoplasm; GO:0005773 vacuole; GO:0005774 vacuolar membrane; GO:0005794 Golgi apparatus; GO:0005829 cytosol; GO:0005886 plasma membrane; GO:0005911 cell-cell junction; GO:0009506 plasmodesma; GO:0009507 chloroplast; GO:0009536 plastid; GO:0012505 endomembrane system; GO:0016020 membrane; GO:0030054 cell junction; GO:0031090 organelle membrane;…	GO:0005488 binding; GO:0005515 protein binding; GO:0042802 identical protein binding;	K04646	CLTC; clathrin heavy chain	cann04144 Endocytosis	PF13838	Clathrin-H-link	U	KOG0985	Vesicle coat protein clathrin, heavy chain
Capana00g004947	"CLPR1_ARATH ATP-dependent Clp protease proteolytic subunit-related protein 1, chloroplastic OS=Arabidopsis thaliana GN=CLPR1 PE=1 SV=1"	CLPR1	nucleus	GO:0006139 nucleobase-containing compound metabolic process; GO:0006364 rRNA processing; GO:0006396 RNA processing; GO:0006725 cellular aromatic compound metabolic process; GO:0006807 nitrogen compound metabolic process; GO:0006996 organelle organization; GO:0008152 metabolic process; GO:0009657 plastid organization; GO:0009658 chloroplast organization; GO:0009987 cellular process; GO:0010467 gen…	GO:0005622 intracellular; GO:0005623 cell; GO:0005737 cytoplasm; GO:0009368 endopeptidase Clp complex; GO:0009507 chloroplast; GO:0009526 plastid envelope; GO:0009532 plastid stroma; GO:0009534 chloroplast thylakoid; GO:0009536 plastid; GO:0009570 chloroplast stroma; GO:0009579 thylakoid; GO:0009840 chloroplastic endopeptidase Clp complex; GO:0009941 chloroplast envelope; GO:0031967 organelle env…	GO:0003676 nucleic acid binding; GO:0003723 RNA binding; GO:0005488 binding; GO:0097159 organic cyclic compound binding; GO:1901363 heterocyclic compound binding;	K01358	clpP, CLPP; ATP-dependent Clp protease, protease subunit [EC:3.4.21.92]		PF00574	Clp protease	O	KOG0840	ATP-dependent Clp protease, proteolytic subunit
Capana00g004955	KIRO_ACTDE Kirola OS=Actinidia deliciosa PE=1 SV=1	---	cytoplasm		GO:0005622 intracellular; GO:0005623 cell; GO:0005737 cytoplasm; GO:0009507 chloroplast; GO:0009536 plastid; GO:0043226 organelle; GO:0043227 membrane-bounded organelle; GO:0043229 intracellular organelle; GO:0043231 intracellular membrane-bounded organelle; GO:0044424 intracellular part; GO:0044444 cytoplasmic part; GO:0044464 cell part;					PF00407	Pathogenesis-related protein Bet v I family
Capana00g004977	"NDHM_POPJC NAD(P)H-quinone oxidoreductase subunit M, chloroplastic OS=Populus jackii GN=ndhM PE=2 SV=1"	ndhM	chloroplast	GO:0009987 cellular process; GO:0010257 NADH dehydrogenase complex assembly; GO:0010258 NADH dehydrogenase complex (plastoquinone) assembly; GO:0016043 cellular component organization; GO:0022607 cellular component assembly; GO:0034622 cellular macromolecular complex assembly; GO:0043933 macromolecular complex subunit organization; GO:0044085 cellular component biogenesis; GO:0065003 macromolecul…	GO:0005622 intracellular; GO:0005623 cell; GO:0005737 cytoplasm; GO:0009507 chloroplast; GO:0009534 chloroplast thylakoid; GO:0009535 chloroplast thylakoid membrane; GO:0009536 plastid; GO:0009579 thylakoid; GO:0010598 NAD(P)H dehydrogenase complex (plastoquinone); GO:0016020 membrane; GO:0031976 plastid thylakoid; GO:0031984 organelle subcompartment; GO:0032991 macromolecular complex; GO:0034357…
Capana00g005022	"AGT21_ARATH Alanine--glyoxylate aminotransferase 2 homolog 1, mitochondrial OS=Arabidopsis thaliana GN=AGT2 PE=1 SV=1"	AGT2	mitochondria	GO:0010035 response to inorganic substance; GO:0010038 response to metal ion; GO:0042221 response to chemical; GO:0046686 response to cadmium ion; GO:0050896 response to stimulus;	GO:0005622 intracellular; GO:0005623 cell; GO:0005737 cytoplasm; GO:0005739 mitochondrion; GO:0005773 vacuole; GO:0005774 vacuolar membrane; GO:0016020 membrane; GO:0031090 organelle membrane; GO:0043226 organelle; GO:0043227 membrane-bounded organelle; GO:0043229 intracellular organelle; GO:0043231 intracellular membrane-bounded organelle; GO:0044422 organelle part; GO:0044424 intracellular part…	GO:0005488 binding; GO:0005515 protein binding; GO:0008144 drug binding; GO:0008270 zinc ion binding; GO:0019842 vitamin binding; GO:0030170 pyridoxal phosphate binding; GO:0036094 small molecule binding; GO:0042802 identical protein binding; GO:0043167 ion binding; GO:0043168 anion binding; GO:0043169 cation binding; GO:0046872 metal ion binding; GO:0046914 transition metal ion binding; GO:00480…	K00827	AGXT2; alanine-glyoxylate transaminase / (R)-3-amino-2-methylpropionate-pyruvate transaminase [EC:2.6.1.44 2.6.1.40]	cann00250 Alanine, aspartate and glutamate metabolism; cann00260 Glycine, serine and threonine metabolism; cann00270 Cysteine and methionine metabolism; cann00280 Valine, leucine and isoleucine degradation; cann01100 Metabolic pathways; cann01110 Biosynthesis of secondary metabolites	PF00202	Aminotransferase class-III	E	KOG1404	Alanine-glyoxylate aminotransferase AGT2
Capana00g005036	"GLTB1_ARATH Ferredoxin-dependent glutamate synthase 1, chloroplastic OS=Arabidopsis thaliana GN=GLU1 PE=1 SV=2"	GLU1	chloroplast	GO:0006082 organic acid metabolic process; GO:0006520 cellular amino acid metabolic process; GO:0006536 glutamate metabolic process; GO:0006537 glutamate biosynthetic process; GO:0006541 glutamine metabolic process; GO:0006807 nitrogen compound metabolic process; GO:0008152 metabolic process; GO:0008652 cellular amino acid biosynthetic process; GO:0009058 biosynthetic process; GO:0009064 glutamin…	GO:0005576 extracellular region; GO:0005622 intracellular; GO:0005623 cell; GO:0005737 cytoplasm; GO:0005739 mitochondrion; GO:0005759 mitochondrial matrix; GO:0009507 chloroplast; GO:0009526 plastid envelope; GO:0009532 plastid stroma; GO:0009536 plastid; GO:0009570 chloroplast stroma; GO:0009941 chloroplast envelope; GO:0016020 membrane; GO:0031967 organelle envelope; GO:0031974 membrane-enclos…	GO:0003824 catalytic activity; GO:0015930 glutamate synthase activity; GO:0016041 glutamate synthase (ferredoxin) activity; GO:0016491 oxidoreductase activity; GO:0016638 oxidoreductase activity, acting on the CH-NH2 group of donors; GO:0016643 oxidoreductase activity, acting on the CH-NH2 group of donors, iron-sulfur protein as acceptor;	K00284	E1.4.7.1; glutamate synthase (ferredoxin) [EC:1.4.7.1]	cann00630 Glyoxylate and dicarboxylate metabolism; cann00910 Nitrogen metabolism	PF00310; PF04898; PF01645	Glutamine amidotransferases class-II; Glutamate synthase central domain; Conserved region in glutamate synthase	E	KOG0399	Glutamate synthase
Capana00g005037	"GLTB_SPIOL Ferredoxin-dependent glutamate synthase, chloroplastic OS=Spinacia oleracea PE=1 SV=3"	---	cytoplasm	GO:0006082 organic acid metabolic process; GO:0006520 cellular amino acid metabolic process; GO:0006536 glutamate metabolic process; GO:0006537 glutamate biosynthetic process; GO:0006541 glutamine metabolic process; GO:0006807 nitrogen compound metabolic process; GO:0008152 metabolic process; GO:0008652 cellular amino acid biosynthetic process; GO:0009058 biosynthetic process; GO:0009064 glutamin…	GO:0005576 extracellular region; GO:0005622 intracellular; GO:0005623 cell; GO:0005737 cytoplasm; GO:0005739 mitochondrion; GO:0005759 mitochondrial matrix; GO:0009507 chloroplast; GO:0009526 plastid envelope; GO:0009532 plastid stroma; GO:0009536 plastid; GO:0009570 chloroplast stroma; GO:0009941 chloroplast envelope; GO:0016020 membrane; GO:0031967 organelle envelope; GO:0031974 membrane-enclos…	GO:0003824 catalytic activity; GO:0015930 glutamate synthase activity; GO:0016041 glutamate synthase (ferredoxin) activity; GO:0016491 oxidoreductase activity; GO:0016638 oxidoreductase activity, acting on the CH-NH2 group of donors; GO:0016643 oxidoreductase activity, acting on the CH-NH2 group of donors, iron-sulfur protein as acceptor;	K00284	E1.4.7.1; glutamate synthase (ferredoxin) [EC:1.4.7.1]	cann00630 Glyoxylate and dicarboxylate metabolism; cann00910 Nitrogen metabolism	PF01645	Conserved region in glutamate synthase	E	KOG0399	Glutamate synthase
Capana00g005041	"RK14_NICTO 50S ribosomal protein L14, chloroplastic OS=Nicotiana tomentosiformis GN=rpl14 PE=3 SV=1"	rpl14	cytoplasm	GO:0009719 response to endogenous stimulus; GO:0009725 response to hormone; GO:0009735 response to cytokinin; GO:0010033 response to organic substance; GO:0042221 response to chemical; GO:0050896 response to stimulus;	GO:0000313 organellar ribosome; GO:0000315 organellar large ribosomal subunit; GO:0005622 intracellular; GO:0005623 cell; GO:0005737 cytoplasm; GO:0005739 mitochondrion; GO:0005759 mitochondrial matrix; GO:0005761 mitochondrial ribosome; GO:0005762 mitochondrial large ribosomal subunit; GO:0005829 cytosol; GO:0005840 ribosome; GO:0009507 chloroplast; GO:0009532 plastid stroma; GO:0009534 chloropl…	GO:0003676 nucleic acid binding; GO:0003723 RNA binding; GO:0003735 structural constituent of ribosome; GO:0005198 structural molecule activity; GO:0005488 binding; GO:0019843 rRNA binding; GO:0070180 large ribosomal subunit rRNA binding; GO:0097159 organic cyclic compound binding; GO:1901363 heterocyclic compound binding;	K02874	RP-L14, MRPL14, rplN; large subunit ribosomal protein L14	cann03010 Ribosome	PF00238	Ribosomal protein L14p/L23e	J	KOG0901	60S ribosomal protein L14/L17/L23
Capana00g005060	RL18A_CASSA 60S ribosomal protein L18a OS=Castanea sativa GN=RPL18A PE=2 SV=1	RPL18A	cytoplasm				K02882	RP-L18Ae, RPL18A; large subunit ribosomal protein L18Ae	cann03010 Ribosome	PF01775	Ribosomal L18ae/LX protein domain	J	KOG0829	60S ribosomal protein L18A
Capana01g000037	PPA27_ARATH Probable inactive purple acid phosphatase 27 OS=Arabidopsis thaliana GN=PAP27 PE=2 SV=1	PAP27	vacuolar membrane				K22390			PF00149; PF14008	Calcineurin-like phosphoesterase; Iron/zinc purple acid phosphatase-like protein C	G	KOG1378	Purple acid phosphatase
Capana01g000056	FRAY2_DICDI Serine/threonine-protein kinase fray2 OS=Dictyostelium discoideum GN=fray2 PE=3 SV=1	fray2	nucleus	GO:0001932 regulation of protein phosphorylation; GO:0001934 positive regulation of protein phosphorylation; GO:0006464 cellular protein modification process; GO:0006468 protein phosphorylation; GO:0006793 phosphorus metabolic process; GO:0006796 phosphate-containing compound metabolic process; GO:0006807 nitrogen compound metabolic process; GO:0006950 response to stress; GO:0007154 cell communic…	GO:0005622 intracellular; GO:0005623 cell; GO:0005737 cytoplasm; GO:0044424 intracellular part; GO:0044464 cell part;	GO:0003824 catalytic activity; GO:0004672 protein kinase activity; GO:0004674 protein serine/threonine kinase activity; GO:0016301 kinase activity; GO:0016740 transferase activity; GO:0016772 transferase activity, transferring phosphorus-containing groups; GO:0016773 phosphotransferase activity, alcohol group as acceptor;				PF00069	Protein kinase domain	T	KOG0582	Ste20-like serine/threonine protein kinase
Capana01g000061	Putative ovule protein	---	plasma membrane
Capana01g000075	AB3F_ARATH ABC transporter F family member 3 OS=Arabidopsis thaliana GN=ABCF3 PE=2 SV=1	ABCF3	cytoplasm	GO:0006950 response to stress; GO:0006952 defense response; GO:0009605 response to external stimulus; GO:0009607 response to biotic stimulus; GO:0009617 response to bacterium; GO:0010035 response to inorganic substance; GO:0010038 response to metal ion; GO:0042221 response to chemical; GO:0042742 defense response to bacterium; GO:0043207 response to external biotic stimulus; GO:0046686 response t…	GO:0005622 intracellular; GO:0005623 cell; GO:0005737 cytoplasm; GO:0005829 cytosol; GO:0044424 intracellular part; GO:0044444 cytoplasmic part; GO:0044464 cell part;	GO:0005215 transporter activity;	K06158	ABCF3; ATP-binding cassette, subfamily F, member 3		PF00005; PF12848	ABC transporter; ABC transporter	EJ	KOG0062	ATPase component of ABC transporters with duplicated ATPase domains/Translation elongation factor EF-3b
Capana01g000078	BIP_SOLLC Luminal-binding protein OS=Solanum lycopersicum PE=2 SV=1	---	endoplasmic reticulum	GO:0006508 proteolysis; GO:0006511 ubiquitin-dependent protein catabolic process; GO:0006807 nitrogen compound metabolic process; GO:0006950 response to stress; GO:0008152 metabolic process; GO:0009056 catabolic process; GO:0009057 macromolecule catabolic process; GO:0009719 response to endogenous stimulus; GO:0009725 response to hormone; GO:0009735 response to cytokinin; GO:0009987 cellular proc…	GO:0005618 cell wall; GO:0005622 intracellular; GO:0005623 cell; GO:0005634 nucleus; GO:0005654 nucleoplasm; GO:0005730 nucleolus; GO:0005737 cytoplasm; GO:0005773 vacuole; GO:0005774 vacuolar membrane; GO:0005783 endoplasmic reticulum; GO:0005788 endoplasmic reticulum lumen; GO:0005794 Golgi apparatus; GO:0005829 cytosol; GO:0005886 plasma membrane; GO:0005911 cell-cell junction; GO:0009506 plas…		K09490	HSPA5, BIP; heat shock 70kDa protein 5	cann03060 Protein export; cann04141 Protein processing in endoplasmic reticulum			O	KOG0100	Molecular chaperones GRP78/BiP/KAR2, HSP70 superfamily
Capana01g000095	BR44L_HUMAN Brain protein 44-like protein OS=Homo sapiens GN=BRP44L PE=1 SV=1	BRP44L	mitochondria				K22138	MPC1; mitochondrial pyruvate carrier 1				C	KOG1590	Uncharacterized conserved protein
Capana01g000144	RTNLB_ARATH Reticulon-like protein B2 OS=Arabidopsis thaliana GN=RTNLB2 PE=1 SV=1	RTNLB2	plasma membrane	GO:0006996 organelle organization; GO:0007029 endoplasmic reticulum organization; GO:0009987 cellular process; GO:0010256 endomembrane system organization; GO:0016043 cellular component organization; GO:0071786 endoplasmic reticulum tubular network organization; GO:0071840 cellular component organization or biogenesis;	GO:0005622 intracellular; GO:0005623 cell; GO:0005737 cytoplasm; GO:0005773 vacuole; GO:0005783 endoplasmic reticulum; GO:0005789 endoplasmic reticulum membrane; GO:0005794 Golgi apparatus; GO:0005886 plasma membrane; GO:0005911 cell-cell junction; GO:0009506 plasmodesma; GO:0012505 endomembrane system; GO:0016020 membrane; GO:0016021 integral component of membrane; GO:0030054 cell junction; GO:0…							U	KOG1792	Reticulon
Capana01g000156	VATE_CITLI V-type proton ATPase subunit E OS=Citrus limon GN=VATE PE=2 SV=1	VATE	cytoplasm	GO:0000003 reproduction; GO:0003006 developmental process involved in reproduction; GO:0006810 transport; GO:0006811 ion transport; GO:0006812 cation transport; GO:0006950 response to stress; GO:0006952 defense response; GO:0006970 response to osmotic stress; GO:0006996 organelle organization; GO:0007030 Golgi organization; GO:0007275 multicellular organism development; GO:0009266 response to tem…	GO:0000325 plant-type vacuole; GO:0005622 intracellular; GO:0005623 cell; GO:0005737 cytoplasm; GO:0005773 vacuole; GO:0005774 vacuolar membrane; GO:0005794 Golgi apparatus; GO:0005829 cytosol; GO:0005840 ribosome; GO:0005844 polysome; GO:0009705 plant-type vacuole membrane; GO:0012505 endomembrane system; GO:0016020 membrane; GO:0022626 cytosolic ribosome; GO:0031090 organelle membrane; GO:00329…	GO:0003735 structural constituent of ribosome; GO:0003824 catalytic activity; GO:0005198 structural molecule activity; GO:0005215 transporter activity; GO:0008324 cation transmembrane transporter activity; GO:0015075 ion transmembrane transporter activity; GO:0015077 monovalent inorganic cation transmembrane transporter activity; GO:0015078 hydrogen ion transmembrane transporter activity; GO:0015…	K02150	ATPeV1E, ATP6E; V-type H+-transporting ATPase subunit E	cann00190 Oxidative phosphorylation; cann01100 Metabolic pathways; cann04145 Phagosome			C	KOG1664	Vacuolar H+-ATPase V1 sector, subunit E
Capana01g000174	"ISPF_CATRO 2-C-methyl-D-erythritol 2,4-cyclodiphosphate synthase, chloroplastic OS=Catharanthus roseus GN=ISPF PE=2 SV=1"	ISPF	chloroplast	GO:0006629 lipid metabolic process; GO:0006720 isoprenoid metabolic process; GO:0006721 terpenoid metabolic process; GO:0006725 cellular aromatic compound metabolic process; GO:0006778 porphyrin-containing compound metabolic process; GO:0006779 porphyrin-containing compound biosynthetic process; GO:0006807 nitrogen compound metabolic process; GO:0008152 metabolic process; GO:0008299 isoprenoid bi…	GO:0005622 intracellular; GO:0005623 cell; GO:0005737 cytoplasm; GO:0009507 chloroplast; GO:0009532 plastid stroma; GO:0009536 plastid; GO:0009570 chloroplast stroma; GO:0043226 organelle; GO:0043227 membrane-bounded organelle; GO:0043229 intracellular organelle; GO:0043231 intracellular membrane-bounded organelle; GO:0044422 organelle part; GO:0044424 intracellular part; GO:0044434 chloroplast p…		K01770	ispF; 2-C-methyl-D-erythritol 2,4-cyclodiphosphate synthase [EC:4.6.1.12]	cann00900 Terpenoid backbone biosynthesis; cann01100 Metabolic pathways; cann01110 Biosynthesis of secondary metabolites
Capana01g000177	"MDARP_ARATH Monodehydroascorbate reductase, chloroplastic OS=Arabidopsis thaliana GN=At1g63940 PE=2 SV=3"	At1g63940	chloroplast	GO:0006950 response to stress; GO:0009266 response to temperature stimulus; GO:0009409 response to cold; GO:0009628 response to abiotic stimulus; GO:0010035 response to inorganic substance; GO:0010038 response to metal ion; GO:0042221 response to chemical; GO:0046686 response to cadmium ion; GO:0050896 response to stimulus;	GO:0005622 intracellular; GO:0005623 cell; GO:0005737 cytoplasm; GO:0005739 mitochondrion; GO:0009507 chloroplast; GO:0009526 plastid envelope; GO:0009532 plastid stroma; GO:0009536 plastid; GO:0009570 chloroplast stroma; GO:0010319 stromule; GO:0031967 organelle envelope; GO:0031975 envelope; GO:0043226 organelle; GO:0043227 membrane-bounded organelle; GO:0043229 intracellular organelle; GO:0043…	GO:0000166 nucleotide binding; GO:0005488 binding; GO:0005524 ATP binding; GO:0008144 drug binding; GO:0017076 purine nucleotide binding; GO:0030554 adenyl nucleotide binding; GO:0032553 ribonucleotide binding; GO:0032555 purine ribonucleotide binding; GO:0032559 adenyl ribonucleotide binding; GO:0035639 purine ribonucleoside triphosphate binding; GO:0036094 small molecule binding; GO:0043167 ion…	K08232	E1.6.5.4; monodehydroascorbate reductase (NADH) [EC:1.6.5.4]	cann00053 Ascorbate and aldarate metabolism; cann01100 Metabolic pathways	PF07992	Pyridine nucleotide-disulphide oxidoreductase	S	KOG1336	Monodehydroascorbate/ferredoxin reductase
Capana01g000182	"PYRB2_PEA Aspartate carbamoyltransferase 2, chloroplastic OS=Pisum sativum GN=PYRB2 PE=2 SV=1"	PYRB2	cytoplasm	GO:0006139 nucleobase-containing compound metabolic process; GO:0006220 pyrimidine nucleotide metabolic process; GO:0006221 pyrimidine nucleotide biosynthetic process; GO:0006725 cellular aromatic compound metabolic process; GO:0006753 nucleoside phosphate metabolic process; GO:0006793 phosphorus metabolic process; GO:0006796 phosphate-containing compound metabolic process; GO:0006807 nitrogen co…	GO:0005622 intracellular; GO:0005623 cell; GO:0005737 cytoplasm; GO:0005829 cytosol; GO:0009507 chloroplast; GO:0009532 plastid stroma; GO:0009536 plastid; GO:0009570 chloroplast stroma; GO:0043226 organelle; GO:0043227 membrane-bounded organelle; GO:0043229 intracellular organelle; GO:0043231 intracellular membrane-bounded organelle; GO:0044422 organelle part; GO:0044424 intracellular part; GO:0…	GO:0003824 catalytic activity; GO:0004070 aspartate carbamoyltransferase activity; GO:0016740 transferase activity; GO:0016741 transferase activity, transferring one-carbon groups; GO:0016743 carboxyl- or carbamoyltransferase activity;	K00609	pyrB, PYR2; aspartate carbamoyltransferase catalytic subunit [EC:2.1.3.2]	cann00240 Pyrimidine metabolism; cann00250 Alanine, aspartate and glutamate metabolism; cann01100 Metabolic pathways	PF02729; PF00185	Aspartate/ornithine carbamoyltransferase, carbamoyl-P binding domain; Aspartate/ornithine carbamoyltransferase, Asp/Orn binding domain	EF	KOG0370	Multifunctional pyrimidine synthesis protein CAD (includes carbamoyl-phophate synthetase, aspartate transcarbamylase, and glutamine amidotransferase)
Capana01g000202	APBLC_ARATH Beta-adaptin-like protein C OS=Arabidopsis thaliana GN=BETAC-AD PE=1 SV=2	BETAC-AD	cytoplasm		GO:0005623 cell; GO:0005886 plasma membrane; GO:0005911 cell-cell junction; GO:0009506 plasmodesma; GO:0016020 membrane; GO:0030054 cell junction; GO:0044464 cell part; GO:0055044 symplast; GO:0071944 cell periphery;		K12392	AP1B1; AP-1 complex subunit beta-1		PF09066	Beta2-adaptin appendage, C-terminal sub-domain	U	KOG1061	Vesicle coat complex AP-1/AP-2/AP-4, beta subunit
Capana01g000221	GSTT1_ARATH Glutathione S-transferase T1 OS=Arabidopsis thaliana GN=GSTT1 PE=2 SV=1	GSTT1	cytoplasm	GO:0006518 peptide metabolic process; GO:0006575 cellular modified amino acid metabolic process; GO:0006749 glutathione metabolic process; GO:0006790 sulfur compound metabolic process; GO:0006807 nitrogen compound metabolic process; GO:0008152 metabolic process; GO:0009056 catabolic process; GO:0009404 toxin metabolic process; GO:0009407 toxin catabolic process; GO:0009636 response to toxic subst…	GO:0005622 intracellular; GO:0005623 cell; GO:0005737 cytoplasm; GO:0005777 peroxisome; GO:0042579 microbody; GO:0043226 organelle; GO:0043227 membrane-bounded organelle; GO:0043229 intracellular organelle; GO:0043231 intracellular membrane-bounded organelle; GO:0044424 intracellular part; GO:0044444 cytoplasmic part; GO:0044464 cell part;	GO:0003824 catalytic activity; GO:0004364 glutathione transferase activity; GO:0016740 transferase activity; GO:0016765 transferase activity, transferring alkyl or aryl (other than methyl) groups;	K00799	GST, gst; glutathione S-transferase [EC:2.5.1.18]	cann00480 Glutathione metabolism; cann01100 Metabolic pathways	PF02798	Glutathione S-transferase, N-terminal domain	O	KOG0867	Glutathione S-transferase
Capana01g000239	"GSH1_SOLLC Glutamate--cysteine ligase, chloroplastic OS=Solanum lycopersicum GN=GSH1 PE=2 SV=1"	GSH1	cytoplasm	GO:0000003 reproduction; GO:0000302 response to reactive oxygen species; GO:0001101 response to acid chemical; GO:0002213 defense response to insect; GO:0002376 immune system process; GO:0003006 developmental process involved in reproduction; GO:0006082 organic acid metabolic process; GO:0006518 peptide metabolic process; GO:0006575 cellular modified amino acid metabolic process; GO:0006725 cellu…	GO:0005622 intracellular; GO:0005623 cell; GO:0005737 cytoplasm; GO:0009507 chloroplast; GO:0009532 plastid stroma; GO:0009536 plastid; GO:0009570 chloroplast stroma; GO:0043226 organelle; GO:0043227 membrane-bounded organelle; GO:0043229 intracellular organelle; GO:0043231 intracellular membrane-bounded organelle; GO:0044422 organelle part; GO:0044424 intracellular part; GO:0044434 chloroplast p…	GO:0003824 catalytic activity; GO:0004357 glutamate-cysteine ligase activity; GO:0016874 ligase activity; GO:0016879 ligase activity, forming carbon-nitrogen bonds; GO:0016881 acid-amino acid ligase activity;	K01919	gshA; glutamate--cysteine ligase [EC:6.3.2.2]	cann00270 Cysteine and methionine metabolism; cann00480 Glutathione metabolism; cann01100 Metabolic pathways
Capana01g000243	AMPN_ECOLI Aminopeptidase N OS=Escherichia coli (strain K12) GN=pepN PE=1 SV=2	pepN	chloroplast	GO:0006508 proteolysis; GO:0006518 peptide metabolic process; GO:0006807 nitrogen compound metabolic process; GO:0008152 metabolic process; GO:0009056 catabolic process; GO:0009987 cellular process; GO:0019538 protein metabolic process; GO:0034641 cellular nitrogen compound metabolic process; GO:0043170 macromolecule metabolic process; GO:0043171 peptide catabolic process; GO:0043603 cellular ami…	GO:0005622 intracellular; GO:0005623 cell; GO:0005737 cytoplasm; GO:0005886 plasma membrane; GO:0016020 membrane; GO:0044424 intracellular part; GO:0044464 cell part; GO:0071944 cell periphery;	GO:0003824 catalytic activity; GO:0004177 aminopeptidase activity; GO:0005488 binding; GO:0005515 protein binding; GO:0008233 peptidase activity; GO:0008235 metalloexopeptidase activity; GO:0008237 metallopeptidase activity; GO:0008238 exopeptidase activity; GO:0008270 zinc ion binding; GO:0016787 hydrolase activity; GO:0033218 amide binding; GO:0042277 peptide binding; GO:0042802 identical prote…	K01256	pepN; aminopeptidase N [EC:3.4.11.2]	cann00480 Glutathione metabolism; cann01100 Metabolic pathways	PF01433; PF11940	Peptidase family M1; Domain of unknown function (DUF3458)	EO	KOG1046	Puromycin-sensitive aminopeptidase and related aminopeptidases
Capana01g000250	PIP1_SOLLC Probable aquaporin PIP-type pTOM75 OS=Solanum lycopersicum PE=2 SV=1	---	plasma membrane	GO:0006810 transport; GO:0006811 ion transport; GO:0006833 water transport; GO:0034220 ion transmembrane transport; GO:0042044 fluid transport; GO:0051179 localization; GO:0051234 establishment of localization; GO:0055085 transmembrane transport;	GO:0005623 cell; GO:0005886 plasma membrane; GO:0005887 integral component of plasma membrane; GO:0016020 membrane; GO:0016021 integral component of membrane; GO:0031224 intrinsic component of membrane; GO:0031226 intrinsic component of plasma membrane; GO:0044425 membrane part; GO:0044459 plasma membrane part; GO:0044464 cell part; GO:0071944 cell periphery;	GO:0005215 transporter activity; GO:0005372 water transmembrane transporter activity; GO:0015250 water channel activity; GO:0015267 channel activity; GO:0015318 inorganic solute uptake transmembrane transporter activity; GO:0022803 passive transmembrane transporter activity; GO:0022838 substrate-specific channel activity; GO:0022857 transmembrane transporter activity;	K09872	PIP; aquaporin PIP				P	KOG0223	Aquaporin (major intrinsic protein family)
Capana01g000279	TLP_ACTDE Thaumatin-like protein OS=Actinidia deliciosa GN=tlp PE=1 SV=2	tlp	extracellular							PF00314	Thaumatin family
Capana01g000289	ERG3_ORYSJ Elicitor-responsive protein 3 OS=Oryza sativa subsp. japonica GN=ERG3 PE=2 SV=1	ERG3	nucleus							PF00168	C2 domain	S	KOG1030	Predicted Ca2+-dependent phospholipid-binding protein
Capana01g000290	MBD6_ARATH Methyl-CpG-binding domain-containing protein 6 OS=Arabidopsis thaliana GN=MBD6 PE=1 SV=1	MBD6	nucleus							PF01429	Methyl-CpG binding domain
Capana01g000293	SELH_MACFA Selenoprotein H OS=Macaca fascicularis GN=SELH PE=2 SV=2	SELH	nucleus
Capana01g000304	RFC2_BOVIN Replication factor C subunit 2 OS=Bos taurus GN=RFC2 PE=2 SV=1	RFC2	cytoplasm	GO:0000723 telomere maintenance; GO:0000731 DNA synthesis involved in DNA repair; GO:0006139 nucleobase-containing compound metabolic process; GO:0006259 DNA metabolic process; GO:0006260 DNA replication; GO:0006261 DNA-dependent DNA replication; GO:0006275 regulation of DNA replication; GO:0006281 DNA repair; GO:0006283 transcription-coupled nucleotide-excision repair; GO:0006289 nucleotide-exci…	GO:0005622 intracellular; GO:0005623 cell; GO:0005634 nucleus; GO:0005654 nucleoplasm; GO:0005657 replication fork; GO:0005663 DNA replication factor C complex; GO:0005694 chromosome; GO:0031390 Ctf18 RFC-like complex; GO:0031974 membrane-enclosed lumen; GO:0031981 nuclear lumen; GO:0032991 macromolecular complex; GO:0043226 organelle; GO:0043227 membrane-bounded organelle; GO:0043228 non-membran…	GO:0000166 nucleotide binding; GO:0005488 binding; GO:0005524 ATP binding; GO:0008144 drug binding; GO:0017076 purine nucleotide binding; GO:0030554 adenyl nucleotide binding; GO:0032553 ribonucleotide binding; GO:0032555 purine ribonucleotide binding; GO:0032559 adenyl ribonucleotide binding; GO:0035639 purine ribonucleoside triphosphate binding; GO:0036094 small molecule binding; GO:0043167 ion…	K10755	RFC2_4; replication factor C subunit 2/4	cann03030 DNA replication; cann03420 Nucleotide excision repair; cann03430 Mismatch repair	PF00004; PF08542	ATPase family associated with various cellular activities (AAA); Replication factor C C-terminal domain	L	KOG0991	Replication factor C, subunit RFC2
Capana01g000323	"ARGD_ALNGL Acetylornithine aminotransferase, mitochondrial OS=Alnus glutinosa GN=AG118 PE=2 SV=1"	AG118	chloroplast	GO:0006082 organic acid metabolic process; GO:0006520 cellular amino acid metabolic process; GO:0006525 arginine metabolic process; GO:0006526 arginine biosynthetic process; GO:0006807 nitrogen compound metabolic process; GO:0006950 response to stress; GO:0006952 defense response; GO:0007275 multicellular organism development; GO:0008152 metabolic process; GO:0008652 cellular amino acid biosynthe…	GO:0005622 intracellular; GO:0005623 cell; GO:0005737 cytoplasm; GO:0009507 chloroplast; GO:0009532 plastid stroma; GO:0009536 plastid; GO:0009570 chloroplast stroma; GO:0043226 organelle; GO:0043227 membrane-bounded organelle; GO:0043229 intracellular organelle; GO:0043231 intracellular membrane-bounded organelle; GO:0044422 organelle part; GO:0044424 intracellular part; GO:0044434 chloroplast p…	GO:0003824 catalytic activity; GO:0003992 N2-acetyl-L-ornithine:2-oxoglutarate 5-aminotransferase activity; GO:0005488 binding; GO:0005507 copper ion binding; GO:0005515 protein binding; GO:0008144 drug binding; GO:0008483 transaminase activity; GO:0016740 transferase activity; GO:0016769 transferase activity, transferring nitrogenous groups; GO:0019842 vitamin binding; GO:0030170 pyridoxal phosp…	K00818	E2.6.1.11, argD; acetylornithine aminotransferase [EC:2.6.1.11]	cann00220 Arginine biosynthesis; cann01100 Metabolic pathways; cann01110 Biosynthesis of secondary metabolites; cann01210 2-Oxocarboxylic acid metabolism; cann01230 Biosynthesis of amino acids	PF00202	Aminotransferase class-III	E	KOG1401	Acetylornithine aminotransferase
Capana01g000335	NUP50_HUMAN Nuclear pore complex protein Nup50 OS=Homo sapiens GN=NUP50 PE=1 SV=2	NUP50	nucleus	GO:0001838 embryonic epithelial tube formation; GO:0001841 neural tube formation; GO:0002009 morphogenesis of an epithelium; GO:0006606 protein import into nucleus; GO:0006810 transport; GO:0006886 intracellular protein transport; GO:0006913 nucleocytoplasmic transport; GO:0007275 multicellular organism development; GO:0007399 nervous system development; GO:0008104 protein localization; GO:000965…	GO:0005622 intracellular; GO:0005623 cell; GO:0005634 nucleus; GO:0005635 nuclear envelope; GO:0005643 nuclear pore; GO:0005654 nucleoplasm; GO:0012505 endomembrane system; GO:0016020 membrane; GO:0031090 organelle membrane; GO:0031965 nuclear membrane; GO:0031967 organelle envelope; GO:0031974 membrane-enclosed lumen; GO:0031975 envelope; GO:0031981 nuclear lumen; GO:0032991 macromolecular compl…	GO:0005488 binding; GO:0005515 protein binding; GO:0008536 Ran GTPase binding; GO:0017016 Ras GTPase binding; GO:0019899 enzyme binding; GO:0031267 small GTPase binding; GO:0051020 GTPase binding;	K14295	NUP50, NPAP60; nuclear pore complex protein Nup50	cann03013 RNA transport			U	KOG2724	Nuclear pore complex component NPAP60L/NUP50
Capana01g000349	HTH_ARATH Protein HOTHEAD OS=Arabidopsis thaliana GN=HTH PE=1 SV=1	HTH	chloroplast	GO:0006082 organic acid metabolic process; GO:0006629 lipid metabolic process; GO:0006631 fatty acid metabolic process; GO:0007154 cell communication; GO:0007267 cell-cell signaling; GO:0007275 multicellular organism development; GO:0008152 metabolic process; GO:0009553 embryo sac development; GO:0009987 cellular process; GO:0010430 fatty acid omega-oxidation; GO:0019395 fatty acid oxidation; GO:…	GO:0005576 extracellular region;	GO:0000166 nucleotide binding; GO:0003824 catalytic activity; GO:0005488 binding; GO:0016829 lyase activity; GO:0016830 carbon-carbon lyase activity; GO:0016832 aldehyde-lyase activity; GO:0036094 small molecule binding; GO:0043167 ion binding; GO:0043168 anion binding; GO:0046593 mandelonitrile lyase activity; GO:0048037 cofactor binding; GO:0050660 flavin adenine dinucleotide binding; GO:005066…				PF00732; PF05199	GMC oxidoreductase; GMC oxidoreductase	E	KOG1238	Glucose dehydrogenase/choline dehydrogenase/mandelonitrile lyase (GMC oxidoreductase family)
Capana01g000354	RHM1_ARATH Probable rhamnose biosynthetic enzyme 1 OS=Arabidopsis thaliana GN=RHM1 PE=1 SV=1	RHM1	cytoplasm	GO:0006139 nucleobase-containing compound metabolic process; GO:0006725 cellular aromatic compound metabolic process; GO:0006793 phosphorus metabolic process; GO:0006807 nitrogen compound metabolic process; GO:0006810 transport; GO:0008152 metabolic process; GO:0009058 biosynthetic process; GO:0009225 nucleotide-sugar metabolic process; GO:0009226 nucleotide-sugar biosynthetic process; GO:0009812…	GO:0005622 intracellular; GO:0005623 cell; GO:0005737 cytoplasm; GO:0005829 cytosol; GO:0005911 cell-cell junction; GO:0009506 plasmodesma; GO:0030054 cell junction; GO:0044424 intracellular part; GO:0044444 cytoplasmic part; GO:0044464 cell part; GO:0055044 symplast;	GO:0003824 catalytic activity; GO:0010280 UDP-L-rhamnose synthase activity; GO:0016829 lyase activity; GO:0016835 carbon-oxygen lyase activity; GO:0016836 hydro-lyase activity; GO:0050377 UDP-glucose 4,6-dehydratase activity;	K12451	UER1; 3,5-epimerase/4-reductase [EC:5.1.3.- 1.1.1.-]	cann00520 Amino sugar and nucleotide sugar metabolism; cann01100 Metabolic pathways	PF04321	RmlD substrate binding domain	G	KOG0747	Putative NAD+-dependent epimerases
Capana01g000355	PLDB1_ARATH Phospholipase D beta 1 OS=Arabidopsis thaliana GN=PLDBETA1 PE=2 SV=4	PLDBETA1	chloroplast	GO:0000003 reproduction; GO:0002376 immune system process; GO:0003006 developmental process involved in reproduction; GO:0006629 lipid metabolic process; GO:0006643 membrane lipid metabolic process; GO:0006950 response to stress; GO:0006952 defense response; GO:0006955 immune response; GO:0006979 response to oxidative stress; GO:0007275 multicellular organism development; GO:0008152 metabolic pro…	GO:0005622 intracellular; GO:0005623 cell; GO:0005737 cytoplasm; GO:0005829 cytosol; GO:0005840 ribosome; GO:0005886 plasma membrane; GO:0005911 cell-cell junction; GO:0009506 plasmodesma; GO:0009507 chloroplast; GO:0009536 plastid; GO:0016020 membrane; GO:0022626 cytosolic ribosome; GO:0030054 cell junction; GO:0032991 macromolecular complex; GO:0043226 organelle; GO:0043227 membrane-bounded org…	GO:0003824 catalytic activity; GO:0004620 phospholipase activity; GO:0004630 phospholipase D activity; GO:0005488 binding; GO:0005543 phospholipid binding; GO:0005546 phosphatidylinositol-4,5-bisphosphate binding; GO:0008081 phosphoric diester hydrolase activity; GO:0008289 lipid binding; GO:0016298 lipase activity; GO:0016787 hydrolase activity; GO:0016788 hydrolase activity, acting on ester bon…	K01115	PLD1_2; phospholipase D1/2 [EC:3.1.4.4]	cann00564 Glycerophospholipid metabolism; cann00565 Ether lipid metabolism; cann01100 Metabolic pathways; cann01110 Biosynthesis of secondary metabolites; cann04144 Endocytosis	PF00168	C2 domain	I	KOG1329	Phospholipase D1
Capana01g000378	Putative metallo-hydrolase/oxidoreductase superfamily protein-like (Fragment)	---	chloroplast							PF13483	Beta-lactamase superfamily domain
Capana01g000496	F10AL_ARATH FAM10 family protein At4g22670 OS=Arabidopsis thaliana GN=At4g22670 PE=1 SV=1	At4g22670	nucleus	GO:0010035 response to inorganic substance; GO:0010038 response to metal ion; GO:0042221 response to chemical; GO:0046686 response to cadmium ion; GO:0050896 response to stimulus;	GO:0005622 intracellular; GO:0005623 cell; GO:0005737 cytoplasm; GO:0005829 cytosol; GO:0044424 intracellular part; GO:0044444 cytoplasmic part; GO:0044464 cell part;		K09560	ST13; suppressor of tumorigenicity protein 13				OT	KOG1308	Hsp70-interacting protein Hip/Transient component of progesterone receptor complexes and an Hsp70-binding protein
Capana01g000497	VAS_ARATH Lipid transfer-like protein VAS OS=Arabidopsis thaliana GN=VAS PE=2 SV=1	VAS	vacuolar membrane
Capana01g000498	Putative spindle assembly checkpoint component MAD1-like	---	chloroplast
Capana01g000505	"EFGC_SOYBN Elongation factor G, chloroplastic OS=Glycine max GN=FUSA PE=3 SV=1"	FUSA	chloroplast				K02355	fusA, GFM, EFG; elongation factor G		PF00009; PF03144; PF03764; PF00679	Elongation factor Tu GTP binding domain; Elongation factor Tu domain 2; Elongation factor G, domain IV; Elongation factor G C-terminus	J	KOG0465	Mitochondrial elongation factor
Capana01g000509	STIP_SOYBN Heat shock protein STI OS=Glycine max GN=STI PE=2 SV=1	STI	cytoplasm	GO:0006950 response to stress; GO:0006986 response to unfolded protein; GO:0009266 response to temperature stimulus; GO:0009408 response to heat; GO:0009409 response to cold; GO:0009611 response to wounding; GO:0009628 response to abiotic stimulus; GO:0009987 cellular process; GO:0010033 response to organic substance; GO:0016043 cellular component organization; GO:0022607 cellular component assem…		GO:0005488 binding; GO:0005515 protein binding; GO:0031072 heat shock protein binding; GO:0051879 Hsp90 protein binding; GO:0070678 preprotein binding;	K09553	STIP1; stress-induced-phosphoprotein 1				O	KOG0548	Molecular co-chaperone STI1
Capana01g000516	"TL225_ARATH Thylakoid lumenal protein At1g12250, chloroplastic OS=Arabidopsis thaliana GN=At1g12250 PE=1 SV=1"	At1g12250	chloroplast		GO:0005622 intracellular; GO:0005623 cell; GO:0005737 cytoplasm; GO:0009507 chloroplast; GO:0009534 chloroplast thylakoid; GO:0009535 chloroplast thylakoid membrane; GO:0009536 plastid; GO:0009579 thylakoid; GO:0016020 membrane; GO:0031976 plastid thylakoid; GO:0031984 organelle subcompartment; GO:0034357 photosynthetic membrane; GO:0042651 thylakoid membrane; GO:0043226 organelle; GO:0043227 mem…
Capana01g000521	SKU5_ARATH Monocopper oxidase-like protein SKU5 OS=Arabidopsis thaliana GN=SKU5 PE=1 SV=1	SKU5	cytoplasm	GO:0000902 cell morphogenesis; GO:0008152 metabolic process; GO:0009653 anatomical structure morphogenesis; GO:0009826 unidimensional cell growth; GO:0009932 cell tip growth; GO:0009987 cellular process; GO:0016043 cellular component organization; GO:0016049 cell growth; GO:0032502 developmental process; GO:0032989 cellular component morphogenesis; GO:0040007 growth; GO:0048589 developmental grow…	GO:0005576 extracellular region; GO:0005618 cell wall; GO:0005622 intracellular; GO:0005623 cell; GO:0005737 cytoplasm; GO:0005773 vacuole; GO:0005774 vacuolar membrane; GO:0005886 plasma membrane; GO:0005911 cell-cell junction; GO:0009505 plant-type cell wall; GO:0009506 plasmodesma; GO:0016020 membrane; GO:0030054 cell junction; GO:0030312 external encapsulating structure; GO:0031090 organelle …	GO:0003824 catalytic activity; GO:0016491 oxidoreductase activity; GO:0016722 oxidoreductase activity, oxidizing metal ions;				PF07732; PF00394; PF07731	Multicopper oxidase; Multicopper oxidase; Multicopper oxidase	Q	KOG1263	Multicopper oxidases
Capana01g000523	TAL_HAES2 Transaldolase OS=Haemophilus somnus (strain 2336) GN=tal PE=3 SV=1	tal	chloroplast				K00616	E2.2.1.2, talA, talB; transaldolase [EC:2.2.1.2]	cann00030 Pentose phosphate pathway; cann01100 Metabolic pathways; cann01110 Biosynthesis of secondary metabolites; cann01200 Carbon metabolism; cann01230 Biosynthesis of amino acids	PF00923	Transaldolase	G	KOG2772	Transaldolase
Capana01g000530	XYL1_ARATH Alpha-xylosidase OS=Arabidopsis thaliana GN=XYL1 PE=1 SV=1	XYL1	endoplasmic reticulum				K15925	XYL1; alpha-D-xyloside xylohydrolase [EC:3.2.1.177]		PF13802	Galactose mutarotase-like	G	KOG1065	Maltase glucoamylase and related hydrolases, glycosyl hydrolase family 31
Capana01g000550	14KD_DAUCA 14 kDa proline-rich protein DC2.15 OS=Daucus carota PE=2 SV=1	---	extracellular
Capana01g000571	HS147_ARATH 14.7 kDa heat shock protein OS=Arabidopsis thaliana GN=HSP14.7 PE=2 SV=1	HSP14.7	chloroplast
Capana01g000612	Putative mucin-19-like	---	nucleus							PF05641	Agenet domain	S	KOG1181	FOG: Low-complexity
Capana01g000625	CCHC-type domain-containing protein	---	nucleus
Capana01g000629	PE191_ARATH Peroxisome biogenesis protein 19-1 OS=Arabidopsis thaliana GN=PEX19-1 PE=1 SV=1	PEX19-1	nucleus	GO:0006605 protein targeting; GO:0006625 protein targeting to peroxisome; GO:0006810 transport; GO:0006886 intracellular protein transport; GO:0006996 organelle organization; GO:0007031 peroxisome organization; GO:0008104 protein localization; GO:0009987 cellular process; GO:0015031 protein transport; GO:0015833 peptide transport; GO:0016043 cellular component organization; GO:0033036 macromolecu…	GO:0005622 intracellular; GO:0005623 cell; GO:0005737 cytoplasm; GO:0005777 peroxisome; GO:0005778 peroxisomal membrane; GO:0005829 cytosol; GO:0016020 membrane; GO:0031090 organelle membrane; GO:0031903 microbody membrane; GO:0042579 microbody; GO:0043226 organelle; GO:0043227 membrane-bounded organelle; GO:0043229 intracellular organelle; GO:0043231 intracellular membrane-bounded organelle; GO:…	GO:0000268 peroxisome targeting sequence binding; GO:0005048 signal sequence binding; GO:0005488 binding; GO:0005515 protein binding; GO:0033218 amide binding; GO:0033328 peroxisome membrane targeting sequence binding; GO:0042277 peptide binding; GO:0042802 identical protein binding;	K13337	PEX19; peroxin-19	cann04146 Peroxisome			U	KOG3133	40 kDa farnesylated protein associated with peroxisomes
Capana01g000643	"DCL_SOLLC Protein DCL, chloroplastic OS=Solanum lycopersicum GN=DCL PE=2 SV=1"	DCL	nucleus	GO:0000003 reproduction; GO:0003006 developmental process involved in reproduction; GO:0006996 organelle organization; GO:0006997 nucleus organization; GO:0007000 nucleolus organization; GO:0007275 multicellular organism development; GO:0009790 embryo development; GO:0009791 post-embryonic development; GO:0009793 embryo development ending in seed dormancy; GO:0009987 cellular process; GO:0010154 …	GO:0005622 intracellular; GO:0005623 cell; GO:0005634 nucleus; GO:0043226 organelle; GO:0043227 membrane-bounded organelle; GO:0043229 intracellular organelle; GO:0043231 intracellular membrane-bounded organelle; GO:0044424 intracellular part; GO:0044464 cell part;
Capana01g000687	HABP4_PAI-RBP1 domain-containing protein	---	nucleus	GO:0001101 response to acid chemical; GO:0006950 response to stress; GO:0006970 response to osmotic stress; GO:0009628 response to abiotic stimulus; GO:0009651 response to salt stress; GO:0009719 response to endogenous stimulus; GO:0009725 response to hormone; GO:0009735 response to cytokinin; GO:0009737 response to abscisic acid; GO:0009787 regulation of abscisic acid-activated signaling pathway…	GO:0005622 intracellular; GO:0005623 cell; GO:0005634 nucleus; GO:0005737 cytoplasm; GO:0005777 peroxisome; GO:0005829 cytosol; GO:0005886 plasma membrane; GO:0016020 membrane; GO:0042579 microbody; GO:0043226 organelle; GO:0043227 membrane-bounded organelle; GO:0043229 intracellular organelle; GO:0043231 intracellular membrane-bounded organelle; GO:0044424 intracellular part; GO:0044444 cytoplas…	GO:0003676 nucleic acid binding; GO:0003723 RNA binding; GO:0003729 mRNA binding; GO:0005488 binding; GO:0097159 organic cyclic compound binding; GO:1901363 heterocyclic compound binding;	K13199	SERBP1; plasminogen activator inhibitor 1 RNA-binding protein				S	KOG2945	Predicted RNA-binding protein
Capana01g000694	"RK19_SPIOL 50S ribosomal protein L19, chloroplastic OS=Spinacia oleracea GN=RPL19 PE=1 SV=2"	RPL19	chloroplast		GO:0005622 intracellular; GO:0005623 cell; GO:0005737 cytoplasm; GO:0009507 chloroplast; GO:0009526 plastid envelope; GO:0009532 plastid stroma; GO:0009536 plastid; GO:0009570 chloroplast stroma; GO:0009941 chloroplast envelope; GO:0016020 membrane; GO:0031967 organelle envelope; GO:0031975 envelope; GO:0043226 organelle; GO:0043227 membrane-bounded organelle; GO:0043229 intracellular organelle; …	GO:0003735 structural constituent of ribosome; GO:0005198 structural molecule activity;	K02884	RP-L19, MRPL19, rplS; large subunit ribosomal protein L19	cann03010 Ribosome			J	KOG1698	Mitochondrial/chloroplast ribosomal protein L19
Capana01g000717	"CLPR4_ARATH ATP-dependent Clp protease proteolytic subunit-related protein 4, chloroplastic OS=Arabidopsis thaliana GN=CLPR4 PE=1 SV=1"	CLPR4	nucleus	GO:0000302 response to reactive oxygen species; GO:0006950 response to stress; GO:0006979 response to oxidative stress; GO:0010468 regulation of gene expression; GO:0019222 regulation of metabolic process; GO:0042221 response to chemical; GO:0050789 regulation of biological process; GO:0050896 response to stimulus; GO:0060255 regulation of macromolecule metabolic process; GO:0065007 biological re…	GO:0005622 intracellular; GO:0005623 cell; GO:0005737 cytoplasm; GO:0009507 chloroplast; GO:0009526 plastid envelope; GO:0009532 plastid stroma; GO:0009536 plastid; GO:0009570 chloroplast stroma; GO:0009941 chloroplast envelope; GO:0031967 organelle envelope; GO:0031975 envelope; GO:0043226 organelle; GO:0043227 membrane-bounded organelle; GO:0043229 intracellular organelle; GO:0043231 intracellu…		K01358	clpP, CLPP; ATP-dependent Clp protease, protease subunit [EC:3.4.21.92]		PF00574	Clp protease	O	KOG0840	ATP-dependent Clp protease, proteolytic subunit
Capana01g000721	Putative lil3 family protein-like	---	nucleus	GO:0006355 regulation of transcription, DNA-templated; GO:0006810 transport; GO:0009889 regulation of biosynthetic process; GO:0009891 positive regulation of biosynthetic process; GO:0009893 positive regulation of metabolic process; GO:0010380 regulation of chlorophyll biosynthetic process; GO:0010468 regulation of gene expression; GO:0010556 regulation of macromolecule biosynthetic process; GO:0…	GO:0005622 intracellular; GO:0005623 cell; GO:0005737 cytoplasm; GO:0009507 chloroplast; GO:0009534 chloroplast thylakoid; GO:0009535 chloroplast thylakoid membrane; GO:0009536 plastid; GO:0009579 thylakoid; GO:0016020 membrane; GO:0031976 plastid thylakoid; GO:0031984 organelle subcompartment; GO:0034357 photosynthetic membrane; GO:0042651 thylakoid membrane; GO:0043226 organelle; GO:0043227 mem…	GO:0003700 transcription factor activity, sequence-specific DNA binding; GO:0005488 binding; GO:0005515 protein binding; GO:0019899 enzyme binding; GO:0042802 identical protein binding; GO:0043495 protein anchor;
Capana01g000791	ENDUA_XENLA Poly(U)-specific endoribonuclease-A OS=Xenopus laevis GN=endou-a PE=1 SV=1	endou-a	nucleus				K14648	ENDOU, PP11; poly(U)-specific endoribonuclease [EC:3.1.-.-]				S	KOG2849	Placental protein 11
Capana01g000808	PMTE_ARATH Probable methyltransferase PMT14 OS=Arabidopsis thaliana GN=At4g18030 PE=1 SV=1	At4g18030	cytoplasm	GO:0008152 metabolic process; GO:0032259 methylation;	GO:0005618 cell wall; GO:0005622 intracellular; GO:0005623 cell; GO:0005737 cytoplasm; GO:0005768 endosome; GO:0005773 vacuole; GO:0005774 vacuolar membrane; GO:0005794 Golgi apparatus; GO:0005802 trans-Golgi network; GO:0009505 plant-type cell wall; GO:0012505 endomembrane system; GO:0016020 membrane; GO:0030312 external encapsulating structure; GO:0031090 organelle membrane; GO:0031410 cytoplas…	GO:0003824 catalytic activity; GO:0008168 methyltransferase activity; GO:0008757 S-adenosylmethionine-dependent methyltransferase activity; GO:0016740 transferase activity; GO:0016741 transferase activity, transferring one-carbon groups;
Capana01g000812	tobamovirus multiplication protein 2A	---	vacuolar membrane	GO:0016032 viral process; GO:0019058 viral life cycle; GO:0019079 viral genome replication; GO:0044403 symbiosis, encompassing mutualism through parasitism; GO:0044419 interspecies interaction between organisms; GO:0046786 viral replication complex formation and maintenance; GO:0051704 multi-organism process;	GO:0000325 plant-type vacuole; GO:0005622 intracellular; GO:0005623 cell; GO:0005737 cytoplasm; GO:0005773 vacuole; GO:0005774 vacuolar membrane; GO:0005794 Golgi apparatus; GO:0005911 cell-cell junction; GO:0009506 plasmodesma; GO:0009705 plant-type vacuole membrane; GO:0012505 endomembrane system; GO:0016020 membrane; GO:0030054 cell junction; GO:0031090 organelle membrane; GO:0043226 organelle…	GO:0005488 binding; GO:0005515 protein binding; GO:0043621 protein self-association;
Capana01g000823	"KPYG_TOBAC Pyruvate kinase isozyme G, chloroplastic OS=Nicotiana tabacum PE=2 SV=1"	---	chloroplast				K00873	PK, pyk; pyruvate kinase [EC:2.7.1.40]	cann00010 Glycolysis / Gluconeogenesis; cann00230 Purine metabolism; cann00620 Pyruvate metabolism; cann01100 Metabolic pathways; cann01110 Biosynthesis of secondary metabolites; cann01200 Carbon metabolism; cann01230 Biosynthesis of amino acids	PF02887	Pyruvate kinase, alpha/beta domain	G	KOG2323	Pyruvate kinase
Capana01g000839	PDI13_ARATH Protein disulfide isomerase-like 1-3 OS=Arabidopsis thaliana GN=PDIL1-3 PE=2 SV=1	PDIL1-3	endoplasmic reticulum				K09580	PDIA1, P4HB; protein disulfide-isomerase A1 [EC:5.3.4.1]	cann04141 Protein processing in endoplasmic reticulum	PF00085; PF13848	Thioredoxin; Thioredoxin-like domain	O	KOG0190	Protein disulfide isomerase (prolyl 4-hydroxylase beta subunit)
Capana01g000865	DUF1995 domain-containing protein	---	chloroplast							PF09353	Domain of unknown function (DUF1995)
Capana01g000893	"KPPR_WHEAT Phosphoribulokinase, chloroplastic OS=Triticum aestivum PE=2 SV=1"	---	chloroplast	GO:0006139 nucleobase-containing compound metabolic process; GO:0006206 pyrimidine nucleobase metabolic process; GO:0006213 pyrimidine nucleoside metabolic process; GO:0006220 pyrimidine nucleotide metabolic process; GO:0006221 pyrimidine nucleotide biosynthetic process; GO:0006222 UMP biosynthetic process; GO:0006725 cellular aromatic compound metabolic process; GO:0006753 nucleoside phosphate m…	GO:0005576 extracellular region; GO:0005622 intracellular; GO:0005623 cell; GO:0005737 cytoplasm; GO:0005829 cytosol; GO:0009507 chloroplast; GO:0009526 plastid envelope; GO:0009532 plastid stroma; GO:0009534 chloroplast thylakoid; GO:0009535 chloroplast thylakoid membrane; GO:0009536 plastid; GO:0009570 chloroplast stroma; GO:0009579 thylakoid; GO:0009941 chloroplast envelope; GO:0010319 stromul…	GO:0003824 catalytic activity; GO:0004849 uridine kinase activity; GO:0005488 binding; GO:0005515 protein binding; GO:0008974 phosphoribulokinase activity; GO:0016301 kinase activity; GO:0016740 transferase activity; GO:0016772 transferase activity, transferring phosphorus-containing groups; GO:0016773 phosphotransferase activity, alcohol group as acceptor; GO:0019205 nucleobase-containing compou…	K00855	PRK, prkB; phosphoribulokinase [EC:2.7.1.19]	cann00710 Carbon fixation in photosynthetic organisms; cann01100 Metabolic pathways; cann01200 Carbon metabolism	PF00485	Phosphoribulokinase / Uridine kinase family	TZ	KOG4203	Armadillo/beta-Catenin/plakoglobin
Capana01g000961	AB2E_ARATH ABC transporter E family member 2 OS=Arabidopsis thaliana GN=ABCE2 PE=2 SV=1	ABCE2	cytoplasm	GO:0000054 ribosomal subunit export from nucleus; GO:0006403 RNA localization; GO:0006405 RNA export from nucleus; GO:0006412 translation; GO:0006413 translational initiation; GO:0006415 translational termination; GO:0006518 peptide metabolic process; GO:0006611 protein export from nucleus; GO:0006807 nitrogen compound metabolic process; GO:0006810 transport; GO:0006886 intracellular protein tran…		GO:0000166 nucleotide binding; GO:0005215 transporter activity; GO:0005488 binding; GO:0005506 iron ion binding; GO:0005524 ATP binding; GO:0008144 drug binding; GO:0017076 purine nucleotide binding; GO:0030554 adenyl nucleotide binding; GO:0032553 ribonucleotide binding; GO:0032555 purine ribonucleotide binding; GO:0032559 adenyl ribonucleotide binding; GO:0035639 purine ribonucleoside triphosph…	K06174	ABCE1, Rli1; ATP-binding cassette, sub-family E, member 1		PF00037; PF00005	4Fe-4S binding domain; ABC transporter	A	KOG0063	RNAse L inhibitor, ABC superfamily
Capana01g000975	NUDT3_ARATH Nudix hydrolase 3 OS=Arabidopsis thaliana GN=NUDT3 PE=1 SV=1	NUDT3	cytoplasm	GO:0006508 proteolysis; GO:0006807 nitrogen compound metabolic process; GO:0008152 metabolic process; GO:0019538 protein metabolic process; GO:0043170 macromolecule metabolic process; GO:0044238 primary metabolic process; GO:0071704 organic substance metabolic process; GO:1901564 organonitrogen compound metabolic process;	GO:0005622 intracellular; GO:0005623 cell; GO:0005737 cytoplasm; GO:0005773 vacuole; GO:0005829 cytosol; GO:0043226 organelle; GO:0043227 membrane-bounded organelle; GO:0043229 intracellular organelle; GO:0043231 intracellular membrane-bounded organelle; GO:0044424 intracellular part; GO:0044444 cytoplasmic part; GO:0044464 cell part;	GO:0003824 catalytic activity; GO:0004177 aminopeptidase activity; GO:0008233 peptidase activity; GO:0008238 exopeptidase activity; GO:0008239 dipeptidyl-peptidase activity; GO:0016787 hydrolase activity; GO:0070011 peptidase activity, acting on L-amino acid peptides;
Capana01g000983	AP4E_ARATH AP-4 complex subunit epsilon OS=Arabidopsis thaliana GN=At1g31730 PE=1 SV=1	At1g31730	nucleus		GO:0005622 intracellular; GO:0005623 cell; GO:0005737 cytoplasm; GO:0005829 cytosol; GO:0005911 cell-cell junction; GO:0009506 plasmodesma; GO:0016020 membrane; GO:0030054 cell junction; GO:0030117 membrane coat; GO:0030119 AP-type membrane coat adaptor complex; GO:0030124 AP-4 adaptor complex; GO:0032991 macromolecular complex; GO:0044424 intracellular part; GO:0044425 membrane part; GO:0044444 …		K12400	AP4E1; AP-4 complex subunit epsilon-1				U	KOG1062	Vesicle coat complex AP-1, gamma subunit
Capana01g000988	PUR9_LISMF Bifunctional purine biosynthesis protein PurH OS=Listeria monocytogenes serotype 4b (strain F2365) GN=purH PE=3 SV=1	purH	chloroplast				K00602	purH; phosphoribosylaminoimidazolecarboxamide formyltransferase / IMP cyclohydrolase [EC:2.1.2.3 3.5.4.10]	cann00230 Purine metabolism; cann00670 One carbon pool by folate; cann01100 Metabolic pathways; cann01110 Biosynthesis of secondary metabolites	PF02142	MGS-like domain	F	KOG2555	AICAR transformylase/IMP cyclohydrolase/methylglyoxal synthase
Capana01g001001	RL132_BRANA 60S ribosomal protein L13-2 OS=Brassica napus PE=2 SV=1	---	chloroplast	GO:0006412 translation; GO:0006518 peptide metabolic process; GO:0006807 nitrogen compound metabolic process; GO:0008152 metabolic process; GO:0009058 biosynthetic process; GO:0009059 macromolecule biosynthetic process; GO:0009719 response to endogenous stimulus; GO:0009725 response to hormone; GO:0009735 response to cytokinin; GO:0009987 cellular process; GO:0010033 response to organic substance…	GO:0005618 cell wall; GO:0005622 intracellular; GO:0005623 cell; GO:0005634 nucleus; GO:0005730 nucleolus; GO:0005737 cytoplasm; GO:0005773 vacuole; GO:0005774 vacuolar membrane; GO:0005829 cytosol; GO:0005840 ribosome; GO:0005844 polysome; GO:0005886 plasma membrane; GO:0005911 cell-cell junction; GO:0009506 plasmodesma; GO:0015934 large ribosomal subunit; GO:0016020 membrane; GO:0022625 cytosol…	GO:0003676 nucleic acid binding; GO:0003723 RNA binding; GO:0003729 mRNA binding; GO:0003735 structural constituent of ribosome; GO:0005198 structural molecule activity; GO:0005488 binding; GO:0097159 organic cyclic compound binding; GO:1901363 heterocyclic compound binding;	K02873	RP-L13e, RPL13; large subunit ribosomal protein L13e	cann03010 Ribosome			J	KOG3295	60S Ribosomal protein L13
Capana01g001028	Lon N-terminal domain-containing protein	---	chloroplast
Capana01g001041	"CLPP4_ARATH ATP-dependent Clp protease proteolytic subunit 4, chloroplastic OS=Arabidopsis thaliana GN=CLPP4 PE=1 SV=1"	CLPP4	chloroplast	GO:0006996 organelle organization; GO:0009657 plastid organization; GO:0009658 chloroplast organization; GO:0009987 cellular process; GO:0016043 cellular component organization; GO:0040034 regulation of development, heterochronic; GO:0048506 regulation of timing of meristematic phase transition; GO:0048509 regulation of meristem development; GO:0048510 regulation of timing of transition from vege…	GO:0005622 intracellular; GO:0005623 cell; GO:0005737 cytoplasm; GO:0009368 endopeptidase Clp complex; GO:0009507 chloroplast; GO:0009526 plastid envelope; GO:0009532 plastid stroma; GO:0009534 chloroplast thylakoid; GO:0009535 chloroplast thylakoid membrane; GO:0009536 plastid; GO:0009570 chloroplast stroma; GO:0009579 thylakoid; GO:0009840 chloroplastic endopeptidase Clp complex; GO:0009941 chl…		K01358	clpP, CLPP; ATP-dependent Clp protease, protease subunit [EC:3.4.21.92]		PF00574	Clp protease	O	KOG0840	ATP-dependent Clp protease, proteolytic subunit
Capana01g001047	PYR1_ARATH Abscisic acid receptor PYR1 OS=Arabidopsis thaliana GN=PYR1 PE=1 SV=1	PYR1	cytoplasm	GO:0001101 response to acid chemical; GO:0007154 cell communication; GO:0007165 signal transduction; GO:0009719 response to endogenous stimulus; GO:0009725 response to hormone; GO:0009737 response to abscisic acid; GO:0009738 abscisic acid-activated signaling pathway; GO:0009755 hormone-mediated signaling pathway; GO:0009892 negative regulation of metabolic process; GO:0009987 cellular process; G…	GO:0005622 intracellular; GO:0005623 cell; GO:0005634 nucleus; GO:0005737 cytoplasm; GO:0005829 cytosol; GO:0043226 organelle; GO:0043227 membrane-bounded organelle; GO:0043229 intracellular organelle; GO:0043231 intracellular membrane-bounded organelle; GO:0044424 intracellular part; GO:0044444 cytoplasmic part; GO:0044464 cell part;	GO:0004857 enzyme inhibitor activity; GO:0004864 protein phosphatase inhibitor activity; GO:0005488 binding; GO:0005515 protein binding; GO:0008289 lipid binding; GO:0010427 abscisic acid binding; GO:0019208 phosphatase regulator activity; GO:0019212 phosphatase inhibitor activity; GO:0019840 isoprenoid binding; GO:0019888 protein phosphatase regulator activity; GO:0030234 enzyme regulator activi…	K14496	PYL; abscisic acid receptor PYR/PYL family	cann04016 MAPK signaling pathway - plant; cann04075 Plant hormone signal transduction
Capana01g001049	ARGE_DICDI Acetylornithine deacetylase OS=Dictyostelium discoideum GN=argE PE=1 SV=2	argE	cytoplasm				K01438	argE; acetylornithine deacetylase [EC:3.5.1.16]	cann00220 Arginine biosynthesis; cann01100 Metabolic pathways; cann01110 Biosynthesis of secondary metabolites; cann01210 2-Oxocarboxylic acid metabolism; cann01230 Biosynthesis of amino acids	PF07687	Peptidase dimerisation domain	E	KOG2276	Metalloexopeptidases
Capana01g001079	"ROC3_NICSY 28 kDa ribonucleoprotein, chloroplastic OS=Nicotiana sylvestris PE=1 SV=1"	---	chloroplast		GO:0005622 intracellular; GO:0005623 cell; GO:0005737 cytoplasm; GO:0009507 chloroplast; GO:0009536 plastid; GO:0043226 organelle; GO:0043227 membrane-bounded organelle; GO:0043229 intracellular organelle; GO:0043231 intracellular membrane-bounded organelle; GO:0044424 intracellular part; GO:0044444 cytoplasmic part; GO:0044464 cell part;					PF00076	RNA recognition motif. (a.k.a. RRM, RBD, or RNP domain)	A	KOG0118	FOG: RRM domain
Capana01g001085	"Succinate dehydrogenase [ubiquinone] iron-sulfur subunit, mitochondrial"	---	chloroplast
Capana01g001119	NAD(P)-bd_dom domain-containing protein	---	chloroplast	GO:0006732 coenzyme metabolic process; GO:0006733 oxidoreduction coenzyme metabolic process; GO:0006743 ubiquinone metabolic process; GO:0006744 ubiquinone biosynthetic process; GO:0006950 response to stress; GO:0006979 response to oxidative stress; GO:0008152 metabolic process; GO:0009058 biosynthetic process; GO:0009108 coenzyme biosynthetic process; GO:0009987 cellular process; GO:0042180 cell…	GO:0005622 intracellular; GO:0005623 cell; GO:0005737 cytoplasm; GO:0009507 chloroplast; GO:0009532 plastid stroma; GO:0009536 plastid; GO:0009570 chloroplast stroma; GO:0009579 thylakoid; GO:0010287 plastoglobule; GO:0043226 organelle; GO:0043227 membrane-bounded organelle; GO:0043229 intracellular organelle; GO:0043231 intracellular membrane-bounded organelle; GO:0044422 organelle part; GO:0044…	GO:0003824 catalytic activity; GO:0003954 NADH dehydrogenase activity; GO:0016491 oxidoreductase activity; GO:0016651 oxidoreductase activity, acting on NAD(P)H;						GM	KOG4288	Predicted oxidoreductase
Capana01g001121	"PLSB_CARTI Glycerol-3-phosphate acyltransferase, chloroplastic OS=Carthamus tinctorius PE=2 SV=1"	---	chloroplast		GO:0005622 intracellular; GO:0005623 cell; GO:0005737 cytoplasm; GO:0009507 chloroplast; GO:0009532 plastid stroma; GO:0009536 plastid; GO:0009570 chloroplast stroma; GO:0043226 organelle; GO:0043227 membrane-bounded organelle; GO:0043229 intracellular organelle; GO:0043231 intracellular membrane-bounded organelle; GO:0044422 organelle part; GO:0044424 intracellular part; GO:0044434 chloroplast p…		K00630	ATS1; glycerol-3-phosphate O-acyltransferase [EC:2.3.1.15]	cann00561 Glycerolipid metabolism; cann00564 Glycerophospholipid metabolism; cann01100 Metabolic pathways
Capana01g001148	EIF3G_XENTR Eukaryotic translation initiation factor 3 subunit G OS=Xenopus tropicalis GN=eif3g PE=2 SV=1	eif3g	cytoplasm				K03248	EIF3G; translation initiation factor 3 subunit G	cann03013 RNA transport	PF00076	RNA recognition motif. (a.k.a. RRM, RBD, or RNP domain)	J	KOG0122	Translation initiation factor 3, subunit g (eIF-3g)
Capana01g001179	"PPOF_SOLLC Polyphenol oxidase F, chloroplastic OS=Solanum lycopersicum PE=3 SV=1"	---	chloroplast		GO:0005622 intracellular; GO:0005623 cell; GO:0005737 cytoplasm; GO:0009507 chloroplast; GO:0009534 chloroplast thylakoid; GO:0009536 plastid; GO:0009543 chloroplast thylakoid lumen; GO:0009579 thylakoid; GO:0031976 plastid thylakoid; GO:0031977 thylakoid lumen; GO:0031978 plastid thylakoid lumen; GO:0031984 organelle subcompartment; GO:0043226 organelle; GO:0043227 membrane-bounded organelle; GO…		K00422	E1.10.3.1; polyphenol oxidase [EC:1.10.3.1]	cann00350 Tyrosine metabolism; cann00950 Isoquinoline alkaloid biosynthesis; cann01100 Metabolic pathways; cann01110 Biosynthesis of secondary metabolites	PF00264; PF12142; PF12143	Common central domain of tyrosinase; Polyphenol oxidase middle domain; Protein of unknown function (DUF_B2219)
Capana01g001190	"Y4139_ARATH Uncharacterized aarF domain-containing protein kinase At4g31390, chloroplastic OS=Arabidopsis thaliana GN=At4g31390 PE=1 SV=1"	At4g31390	cytoplasm,nucleus	GO:0001101 response to acid chemical; GO:0006091 generation of precursor metabolites and energy; GO:0006464 cellular protein modification process; GO:0006468 protein phosphorylation; GO:0006725 cellular aromatic compound metabolic process; GO:0006778 porphyrin-containing compound metabolic process; GO:0006787 porphyrin-containing compound catabolic process; GO:0006793 phosphorus metabolic process…	GO:0005622 intracellular; GO:0005623 cell; GO:0005737 cytoplasm; GO:0009507 chloroplast; GO:0009532 plastid stroma; GO:0009536 plastid; GO:0009570 chloroplast stroma; GO:0010287 plastoglobule; GO:0043226 organelle; GO:0043227 membrane-bounded organelle; GO:0043229 intracellular organelle; GO:0043231 intracellular membrane-bounded organelle; GO:0044422 organelle part; GO:0044424 intracellular part…	GO:0003824 catalytic activity; GO:0004672 protein kinase activity; GO:0016301 kinase activity; GO:0016740 transferase activity; GO:0016772 transferase activity, transferring phosphorus-containing groups; GO:0016773 phosphotransferase activity, alcohol group as acceptor;						S	KOG1235	Predicted unusual protein kinase
Capana01g001202	"SYWC_HUMAN Tryptophan--tRNA ligase, cytoplasmic OS=Homo sapiens GN=WARS PE=1 SV=2"	WARS	cytoskeleton	GO:0006082 organic acid metabolic process; GO:0006139 nucleobase-containing compound metabolic process; GO:0006399 tRNA metabolic process; GO:0006412 translation; GO:0006418 tRNA aminoacylation for protein translation; GO:0006436 tryptophanyl-tRNA aminoacylation; GO:0006518 peptide metabolic process; GO:0006520 cellular amino acid metabolic process; GO:0006725 cellular aromatic compound metabolic…	GO:0005622 intracellular; GO:0005623 cell; GO:0005737 cytoplasm; GO:0005829 cytosol; GO:0044424 intracellular part; GO:0044444 cytoplasmic part; GO:0044464 cell part;	GO:0003824 catalytic activity; GO:0004812 aminoacyl-tRNA ligase activity; GO:0004830 tryptophan-tRNA ligase activity; GO:0016874 ligase activity; GO:0016875 ligase activity, forming carbon-oxygen bonds;	K01867	WARS, trpS; tryptophanyl-tRNA synthetase [EC:6.1.1.2]	cann00970 Aminoacyl-tRNA biosynthesis			J	KOG2145	Cytoplasmic tryptophanyl-tRNA synthetase
Capana01g001210	"E135_ARATH Glucan endo-1,3-beta-glucosidase 5 OS=Arabidopsis thaliana GN=At4g31140 PE=1 SV=1"	At4g31140	endoplasmic reticulum		GO:0005618 cell wall; GO:0005622 intracellular; GO:0005623 cell; GO:0005737 cytoplasm; GO:0005773 vacuole; GO:0005886 plasma membrane; GO:0005911 cell-cell junction; GO:0009505 plant-type cell wall; GO:0009506 plasmodesma; GO:0016020 membrane; GO:0030054 cell junction; GO:0030312 external encapsulating structure; GO:0031224 intrinsic component of membrane; GO:0031225 anchored component of membran…	GO:0001871 pattern binding; GO:0003824 catalytic activity; GO:0004553 hydrolase activity, hydrolyzing O-glycosyl compounds; GO:0005488 binding; GO:0016787 hydrolase activity; GO:0016798 hydrolase activity, acting on glycosyl bonds; GO:0030246 carbohydrate binding; GO:0030247 polysaccharide binding;	K19893	GN5_6; glucan endo-1,3-beta-glucosidase 5/6 [EC:3.2.1.39]	cann00500 Starch and sucrose metabolism; cann01100 Metabolic pathways	PF00332; PF07983	Glycosyl hydrolases family 17; X8 domain
Capana01g001216	P2C60_ARATH Probable protein phosphatase 2C 60 OS=Arabidopsis thaliana GN=At4g31860 PE=2 SV=1	At4g31860	cytoplasm	GO:0001101 response to acid chemical; GO:0009719 response to endogenous stimulus; GO:0009725 response to hormone; GO:0009737 response to abscisic acid; GO:0010033 response to organic substance; GO:0033993 response to lipid; GO:0042221 response to chemical; GO:0050896 response to stimulus; GO:0097305 response to alcohol; GO:1901700 response to oxygen-containing compound;	GO:0005623 cell; GO:0005886 plasma membrane; GO:0016020 membrane; GO:0044464 cell part; GO:0071944 cell periphery;		K17499	PPM1G, PP2CG; protein phosphatase 1G [EC:3.1.3.16]				T	KOG0698	Serine/threonine protein phosphatase
Capana01g001226	inner centromere protein	---	plasma membrane
Capana01g001230	ARAK_ARATH L-arabinokinase OS=Arabidopsis thaliana GN=ARA1 PE=1 SV=1	ARA1	cytoplasm	GO:0005975 carbohydrate metabolic process; GO:0006793 phosphorus metabolic process; GO:0006796 phosphate-containing compound metabolic process; GO:0008152 metabolic process; GO:0009987 cellular process; GO:0016310 phosphorylation; GO:0044237 cellular metabolic process; GO:0044238 primary metabolic process; GO:0044262 cellular carbohydrate metabolic process; GO:0046835 carbohydrate phosphorylation…	GO:0005622 intracellular; GO:0005623 cell; GO:0005737 cytoplasm; GO:0005829 cytosol; GO:0005911 cell-cell junction; GO:0009506 plasmodesma; GO:0030054 cell junction; GO:0044424 intracellular part; GO:0044444 cytoplasmic part; GO:0044464 cell part; GO:0055044 symplast;	GO:0003824 catalytic activity; GO:0009702 L-arabinokinase activity; GO:0016301 kinase activity; GO:0016740 transferase activity; GO:0016772 transferase activity, transferring phosphorus-containing groups; GO:0016773 phosphotransferase activity, alcohol group as acceptor; GO:0019200 carbohydrate kinase activity;	K12446	E2.7.1.46; L-arabinokinase [EC:2.7.1.46]	cann00520 Amino sugar and nucleotide sugar metabolism; cann01100 Metabolic pathways	PF13528; PF10509	Glycosyl transferase family 1; Galactokinase galactose-binding signature	G	KOG0631	Galactokinase
Capana01g001326	CXE8_ARATH Probable carboxylesterase 8 OS=Arabidopsis thaliana GN=CXE8 PE=2 SV=1	CXE8	cytoplasm	GO:0008152 metabolic process; GO:0009056 catabolic process;		GO:0003824 catalytic activity; GO:0016787 hydrolase activity;				PF07859	alpha/beta hydrolase fold	V	KOG1515	Arylacetamide deacetylase
Capana01g001333	"GAUT1_ARATH Alpha-1,4-galacturonosyltransferase 1 OS=Arabidopsis thaliana GN=GAUT1 PE=1 SV=1"	GAUT1	chloroplast	GO:0000271 polysaccharide biosynthetic process; GO:0005975 carbohydrate metabolic process; GO:0005976 polysaccharide metabolic process; GO:0008152 metabolic process; GO:0009058 biosynthetic process; GO:0009059 macromolecule biosynthetic process; GO:0009664 plant-type cell wall organization; GO:0009832 plant-type cell wall biogenesis; GO:0009987 cellular process; GO:0010289 homogalacturonan biosyn…	GO:0005622 intracellular; GO:0005623 cell; GO:0005737 cytoplasm; GO:0005768 endosome; GO:0005794 Golgi apparatus; GO:0005802 trans-Golgi network; GO:0012505 endomembrane system; GO:0031410 cytoplasmic vesicle; GO:0031982 vesicle; GO:0031984 organelle subcompartment; GO:0043226 organelle; GO:0043227 membrane-bounded organelle; GO:0043229 intracellular organelle; GO:0043231 intracellular membrane-b…	GO:0003824 catalytic activity; GO:0008194 UDP-glycosyltransferase activity; GO:0016740 transferase activity; GO:0016757 transferase activity, transferring glycosyl groups; GO:0016758 transferase activity, transferring hexosyl groups; GO:0047262 polygalacturonate 4-alpha-galacturonosyltransferase activity;	K13648	GAUT; alpha-1,4-galacturonosyltransferase [EC:2.4.1.43]	cann00520 Amino sugar and nucleotide sugar metabolism; cann01100 Metabolic pathways
Capana01g001358	"FN3KR_ARATH Protein-ribulosamine 3-kinase, chloroplastic OS=Arabidopsis thaliana GN=At3g61080 PE=1 SV=2"	At3g61080	cytoplasm	GO:0006793 phosphorus metabolic process; GO:0006796 phosphate-containing compound metabolic process; GO:0008152 metabolic process; GO:0009987 cellular process; GO:0016310 phosphorylation; GO:0044237 cellular metabolic process;	GO:0005622 intracellular; GO:0005623 cell; GO:0005737 cytoplasm; GO:0005739 mitochondrion; GO:0009507 chloroplast; GO:0009536 plastid; GO:0043226 organelle; GO:0043227 membrane-bounded organelle; GO:0043229 intracellular organelle; GO:0043231 intracellular membrane-bounded organelle; GO:0044424 intracellular part; GO:0044444 cytoplasmic part; GO:0044464 cell part;	GO:0003824 catalytic activity; GO:0016301 kinase activity; GO:0016740 transferase activity; GO:0016772 transferase activity, transferring phosphorus-containing groups;	K15523	FN3KRP; protein-ribulosamine 3-kinase [EC:2.7.1.172]				G	KOG3021	Predicted kinase
Capana01g001363	PX115_ORYSJ Peroxisomal membrane protein 11-5 OS=Oryza sativa subsp. japonica GN=PEX11-5 PE=2 SV=1	PEX11-5	nucleus	GO:0006996 organelle organization; GO:0007031 peroxisome organization; GO:0009987 cellular process; GO:0016043 cellular component organization; GO:0016559 peroxisome fission; GO:0032535 regulation of cellular component size; GO:0044375 regulation of peroxisome size; GO:0048285 organelle fission; GO:0065007 biological regulation; GO:0065008 regulation of biological quality; GO:0071840 cellular com…	GO:0005622 intracellular; GO:0005623 cell; GO:0005737 cytoplasm; GO:0005777 peroxisome; GO:0005778 peroxisomal membrane; GO:0005779 integral component of peroxisomal membrane; GO:0005911 cell-cell junction; GO:0009506 plasmodesma; GO:0016020 membrane; GO:0016021 integral component of membrane; GO:0030054 cell junction; GO:0031090 organelle membrane; GO:0031224 intrinsic component of membrane; GO:…	GO:0005488 binding; GO:0005515 protein binding; GO:0042802 identical protein binding;						U	KOG4186	Peroxisomal biogenesis protein (peroxin)
Capana01g001375	Nitroreductase domain-containing protein	---	chloroplast							PF00881	Nitroreductase family
Capana01g001378	"AROA1_TOBAC 3-phosphoshikimate 1-carboxyvinyltransferase 1, chloroplastic OS=Nicotiana tabacum GN=EPSPS-1 PE=2 SV=1"	EPSPS-1	chloroplast				K00800	aroA; 3-phosphoshikimate 1-carboxyvinyltransferase [EC:2.5.1.19]	cann00400 Phenylalanine, tyrosine and tryptophan biosynthesis; cann01100 Metabolic pathways; cann01110 Biosynthesis of secondary metabolites; cann01230 Biosynthesis of amino acids			E	KOG0692	Pentafunctional AROM protein
Capana01g001392	TBL2_MOUSE Transducin beta-like protein 2 OS=Mus musculus GN=Tbl2 PE=2 SV=2	Tbl2	chloroplast	GO:0001666 response to hypoxia; GO:0006950 response to stress; GO:0006986 response to unfolded protein; GO:0007154 cell communication; GO:0007165 signal transduction; GO:0009267 cellular response to starvation; GO:0009605 response to external stimulus; GO:0009628 response to abiotic stimulus; GO:0009987 cellular process; GO:0009991 response to extracellular stimulus; GO:0010033 response to organi…	GO:0005622 intracellular; GO:0005623 cell; GO:0005737 cytoplasm; GO:0005783 endoplasmic reticulum; GO:0012505 endomembrane system; GO:0043226 organelle; GO:0043227 membrane-bounded organelle; GO:0043229 intracellular organelle; GO:0043231 intracellular membrane-bounded organelle; GO:0044424 intracellular part; GO:0044444 cytoplasmic part; GO:0044464 cell part;	GO:0005488 binding; GO:0005515 protein binding; GO:0019899 enzyme binding; GO:0019900 kinase binding; GO:0019901 protein kinase binding; GO:0031369 translation initiation factor binding; GO:0051219 phosphoprotein binding;	K23325					S	KOG2096	WD40 repeat protein
Capana01g001409	BIG2_HUMAN Brefeldin A-inhibited guanine nucleotide-exchange protein 2 OS=Homo sapiens GN=ARFGEF2 PE=1 SV=3	ARFGEF2	plasma membrane	GO:0001817 regulation of cytokine production; GO:0001819 positive regulation of cytokine production; GO:0001881 receptor recycling; GO:0006810 transport; GO:0006887 exocytosis; GO:0006892 post-Golgi vesicle-mediated transport; GO:0006893 Golgi to plasma membrane transport; GO:0006996 organelle organization; GO:0007032 endosome organization; GO:0007154 cell communication; GO:0007165 signal transdu…	GO:0000139 Golgi membrane; GO:0005622 intracellular; GO:0005623 cell; GO:0005634 nucleus; GO:0005737 cytoplasm; GO:0005768 endosome; GO:0005794 Golgi apparatus; GO:0005802 trans-Golgi network; GO:0005815 microtubule organizing center; GO:0005829 cytosol; GO:0005856 cytoskeleton; GO:0005874 microtubule; GO:0005879 axonemal microtubule; GO:0005881 cytoplasmic microtubule; GO:0005929 cilium; GO:0005…	GO:0005085 guanyl-nucleotide exchange factor activity; GO:0005086 ARF guanyl-nucleotide exchange factor activity; GO:0005102 receptor binding; GO:0005488 binding; GO:0005515 protein binding; GO:0019899 enzyme binding; GO:0034237 protein kinase A regulatory subunit binding; GO:0050811 GABA receptor binding; GO:0051018 protein kinase A binding; GO:0051020 GTPase binding; GO:0098772 molecular functi…	K18442	ARFGEF, BIG; brefeldin A-inhibited guanine nucleotide-exchange protein	cann04144 Endocytosis	PF12783; PF01369	Guanine nucleotide exchange factor in Golgi transport N-terminal; Sec7 domain	U	KOG0929	Guanine nucleotide exchange factor
Capana01g001419	FLA10_ARATH Fasciclin-like arabinogalactan protein 10 OS=Arabidopsis thaliana GN=FLA10 PE=1 SV=1	FLA10	plasma membrane		GO:0005576 extracellular region; GO:0005618 cell wall; GO:0005623 cell; GO:0005886 plasma membrane; GO:0009505 plant-type cell wall; GO:0016020 membrane; GO:0030312 external encapsulating structure; GO:0031224 intrinsic component of membrane; GO:0031225 anchored component of membrane; GO:0031226 intrinsic component of plasma membrane; GO:0044425 membrane part; GO:0044459 plasma membrane part; GO:…					PF02469	Fasciclin domain
Capana01g001469	SOT16_ARATH Sulfotransferase 16 OS=Arabidopsis thaliana GN=SOT16 PE=1 SV=1	SOT16	nucleus	GO:0001101 response to acid chemical; GO:0002376 immune system process; GO:0006082 organic acid metabolic process; GO:0006790 sulfur compound metabolic process; GO:0006807 nitrogen compound metabolic process; GO:0006950 response to stress; GO:0006952 defense response; GO:0006955 immune response; GO:0008152 metabolic process; GO:0009058 biosynthetic process; GO:0009605 response to external stimulu…		GO:0003824 catalytic activity; GO:0008146 sulfotransferase activity; GO:0016740 transferase activity; GO:0016782 transferase activity, transferring sulfur-containing groups; GO:0047364 desulfoglucosinolate sulfotransferase activity; GO:0080066 3-methylthiopropyl-desulfoglucosinolate sulfotransferase activity; GO:0080067 4-methylthiobutyl-desulfoglucosinolate sulfotransferase activity; GO:0080068 …				PF00685	Sulfotransferase domain	S	KOG1584	Sulfotransferase
Capana01g001480	"FABI_BRANA Enoyl-[acyl-carrier-protein] reductase [NADH], chloroplastic OS=Brassica napus PE=1 SV=2"	---	chloroplast	GO:0006082 organic acid metabolic process; GO:0006629 lipid metabolic process; GO:0006631 fatty acid metabolic process; GO:0006633 fatty acid biosynthetic process; GO:0008152 metabolic process; GO:0008610 lipid biosynthetic process; GO:0009058 biosynthetic process; GO:0009987 cellular process; GO:0016053 organic acid biosynthetic process; GO:0019752 carboxylic acid metabolic process; GO:0032787 m…	GO:0005622 intracellular; GO:0005623 cell; GO:0005737 cytoplasm; GO:0005829 cytosol; GO:0005835 fatty acid synthase complex; GO:0009507 chloroplast; GO:0009526 plastid envelope; GO:0009532 plastid stroma; GO:0009536 plastid; GO:0009570 chloroplast stroma; GO:0009579 thylakoid; GO:0009941 chloroplast envelope; GO:0031967 organelle envelope; GO:0031975 envelope; GO:0032991 macromolecular complex; G…	GO:0003824 catalytic activity; GO:0005488 binding; GO:0005507 copper ion binding; GO:0016491 oxidoreductase activity; GO:0016627 oxidoreductase activity, acting on the CH-CH group of donors; GO:0016628 oxidoreductase activity, acting on the CH-CH group of donors, NAD or NADP as acceptor; GO:0016631 enoyl-[acyl-carrier-protein] reductase activity; GO:0043167 ion binding; GO:0043169 cation binding;…	K00208	fabI; enoyl-[acyl-carrier protein] reductase I [EC:1.3.1.9 1.3.1.10]	cann00061 Fatty acid biosynthesis; cann00780 Biotin metabolism; cann01100 Metabolic pathways; cann01212 Fatty acid metabolism	PF13561	Enoyl-(Acyl carrier protein) reductase	Q	KOG0725	Reductases with broad range of substrate specificities
Capana01g001486	"3-oxo-Delta(4,5)-steroid 5-beta-reductase-like"	---	cytoplasm				K22419
Capana01g001487	"FD6E2_SOYBN Omega-6 fatty acid desaturase, endoplasmic reticulum isozyme 2 OS=Glycine max GN=FAD2-2 PE=2 SV=1"	FAD2-2	cytoplasm	GO:0008152 metabolic process; GO:0055114 oxidation-reduction process;	GO:0005622 intracellular; GO:0005623 cell; GO:0005737 cytoplasm; GO:0005783 endoplasmic reticulum; GO:0005789 endoplasmic reticulum membrane; GO:0012505 endomembrane system; GO:0016020 membrane; GO:0016021 integral component of membrane; GO:0030176 integral component of endoplasmic reticulum membrane; GO:0031224 intrinsic component of membrane; GO:0031227 intrinsic component of endoplasmic reticu…	GO:0003824 catalytic activity; GO:0004497 monooxygenase activity; GO:0016491 oxidoreductase activity; GO:0016705 oxidoreductase activity, acting on paired donors, with incorporation or reduction of molecular oxygen; GO:0016709 oxidoreductase activity, acting on paired donors, with incorporation or reduction of molecular oxygen, NAD(P)H as one donor, and incorporation of one atom of oxygen; GO:005…	K10256	FAD2; omega-6 fatty acid desaturase / acyl-lipid omega-6 desaturase (Delta-12 desaturase) [EC:1.14.19.6 1.14.19.22]	cann01040 Biosynthesis of unsaturated fatty acids; cann01100 Metabolic pathways; cann01212 Fatty acid metabolism	PF00487	Fatty acid desaturase
Capana01g001516	UGPI5_ARATH Uncharacterized GPI-anchored protein At1g27950 OS=Arabidopsis thaliana GN=At1g27950 PE=1 SV=1	At1g27950	extracellular
Capana01g001519	"Putative 6,7-dimethyl-8-ribityllumazine synthase-like"	---	chloroplast
Capana01g001551	FTHS_SPIOL Formate--tetrahydrofolate ligase OS=Spinacia oleracea PE=1 SV=3	---	cytoplasm	GO:0006082 organic acid metabolic process; GO:0006139 nucleobase-containing compound metabolic process; GO:0006144 purine nucleobase metabolic process; GO:0006575 cellular modified amino acid metabolic process; GO:0006725 cellular aromatic compound metabolic process; GO:0006732 coenzyme metabolic process; GO:0006760 folic acid-containing compound metabolic process; GO:0006807 nitrogen compound me…	GO:0005576 extracellular region; GO:0005622 intracellular; GO:0005623 cell; GO:0005737 cytoplasm; GO:0005829 cytosol; GO:0005886 plasma membrane; GO:0009507 chloroplast; GO:0009536 plastid; GO:0016020 membrane; GO:0043226 organelle; GO:0043227 membrane-bounded organelle; GO:0043229 intracellular organelle; GO:0043231 intracellular membrane-bounded organelle; GO:0044424 intracellular part; GO:0044…	GO:0003824 catalytic activity; GO:0004329 formate-tetrahydrofolate ligase activity; GO:0004477 methenyltetrahydrofolate cyclohydrolase activity; GO:0004488 methylenetetrahydrofolate dehydrogenase (NADP+) activity; GO:0005488 binding; GO:0005507 copper ion binding; GO:0016491 oxidoreductase activity; GO:0016645 oxidoreductase activity, acting on the CH-NH group of donors; GO:0016646 oxidoreductase…	K01938	fhs; formate--tetrahydrofolate ligase [EC:6.3.4.3]	cann00670 One carbon pool by folate; cann01100 Metabolic pathways; cann01200 Carbon metabolism
Capana01g001553	PERX_TOBAC Lignin-forming anionic peroxidase OS=Nicotiana tabacum PE=2 SV=1	---	plasma membrane				K00430	E1.11.1.7; peroxidase [EC:1.11.1.7]	cann00940 Phenylpropanoid biosynthesis; cann01100 Metabolic pathways; cann01110 Biosynthesis of secondary metabolites	PF00141	Peroxidase
Capana01g001574	"LOX21_SOLTU Linoleate 13S-lipoxygenase 2-1, chloroplastic OS=Solanum tuberosum GN=LOX2.1 PE=1 SV=1"	LOX2.1	chloroplast	GO:0006082 organic acid metabolic process; GO:0006629 lipid metabolic process; GO:0006631 fatty acid metabolic process; GO:0006690 icosanoid metabolic process; GO:0008152 metabolic process; GO:0009987 cellular process; GO:0010597 green leaf volatile biosynthetic process; GO:0019372 lipoxygenase pathway; GO:0019752 carboxylic acid metabolic process; GO:0032787 monocarboxylic acid metabolic process…	GO:0005622 intracellular; GO:0005623 cell; GO:0005737 cytoplasm; GO:0009507 chloroplast; GO:0009532 plastid stroma; GO:0009534 chloroplast thylakoid; GO:0009536 plastid; GO:0009570 chloroplast stroma; GO:0009579 thylakoid; GO:0031976 plastid thylakoid; GO:0031984 organelle subcompartment; GO:0043226 organelle; GO:0043227 membrane-bounded organelle; GO:0043229 intracellular organelle; GO:0043231 i…	GO:0003824 catalytic activity; GO:0016165 linoleate 13S-lipoxygenase activity; GO:0016491 oxidoreductase activity; GO:0016701 oxidoreductase activity, acting on single donors with incorporation of molecular oxygen; GO:0016702 oxidoreductase activity, acting on single donors with incorporation of molecular oxygen, incorporation of two atoms of oxygen; GO:0051213 dioxygenase activity;	K00454	LOX2S; lipoxygenase [EC:1.13.11.12]	cann00591 Linoleic acid metabolism; cann00592 alpha-Linolenic acid metabolism; cann01100 Metabolic pathways; cann01110 Biosynthesis of secondary metabolites	PF01477; PF00305	PLAT/LH2 domain; Lipoxygenase
Capana01g001578	"LOX21_SOLTU Linoleate 13S-lipoxygenase 2-1, chloroplastic OS=Solanum tuberosum GN=LOX2.1 PE=1 SV=1"	LOX2.1	chloroplast	GO:0006082 organic acid metabolic process; GO:0006629 lipid metabolic process; GO:0006631 fatty acid metabolic process; GO:0006690 icosanoid metabolic process; GO:0008152 metabolic process; GO:0009987 cellular process; GO:0010597 green leaf volatile biosynthetic process; GO:0019372 lipoxygenase pathway; GO:0019752 carboxylic acid metabolic process; GO:0032787 monocarboxylic acid metabolic process…	GO:0005622 intracellular; GO:0005623 cell; GO:0005737 cytoplasm; GO:0009507 chloroplast; GO:0009532 plastid stroma; GO:0009534 chloroplast thylakoid; GO:0009536 plastid; GO:0009570 chloroplast stroma; GO:0009579 thylakoid; GO:0031976 plastid thylakoid; GO:0031984 organelle subcompartment; GO:0043226 organelle; GO:0043227 membrane-bounded organelle; GO:0043229 intracellular organelle; GO:0043231 i…	GO:0003824 catalytic activity; GO:0016165 linoleate 13S-lipoxygenase activity; GO:0016491 oxidoreductase activity; GO:0016701 oxidoreductase activity, acting on single donors with incorporation of molecular oxygen; GO:0016702 oxidoreductase activity, acting on single donors with incorporation of molecular oxygen, incorporation of two atoms of oxygen; GO:0051213 dioxygenase activity;	K00454	LOX2S; lipoxygenase [EC:1.13.11.12]	cann00591 Linoleic acid metabolism; cann00592 alpha-Linolenic acid metabolism; cann01100 Metabolic pathways; cann01110 Biosynthesis of secondary metabolites	PF01477; PF00305	PLAT/LH2 domain; Lipoxygenase
Capana01g001582	IDND_VITVI L-idonate 5-dehydrogenase OS=Vitis vinifera GN=VIT_16s0100g00290 PE=1 SV=2	VIT_16s0100g00290	cytoplasm	GO:0008152 metabolic process; GO:0055114 oxidation-reduction process;	GO:0005622 intracellular; GO:0005623 cell; GO:0005737 cytoplasm; GO:0005829 cytosol; GO:0005911 cell-cell junction; GO:0009506 plasmodesma; GO:0030054 cell junction; GO:0044424 intracellular part; GO:0044444 cytoplasmic part; GO:0044464 cell part; GO:0055044 symplast;	GO:0003824 catalytic activity; GO:0003939 L-iditol 2-dehydrogenase activity; GO:0016491 oxidoreductase activity; GO:0016614 oxidoreductase activity, acting on CH-OH group of donors; GO:0016616 oxidoreductase activity, acting on the CH-OH group of donors, NAD or NADP as acceptor;	K00008	SORD, gutB; L-iditol 2-dehydrogenase [EC:1.1.1.14]	cann00040 Pentose and glucuronate interconversions; cann00051 Fructose and mannose metabolism; cann01100 Metabolic pathways	PF08240	Alcohol dehydrogenase GroES-like domain	Q	KOG0024	Sorbitol dehydrogenase
Capana01g001616	D-xylose dehydrogenase	---	chloroplast	GO:0006139 nucleobase-containing compound metabolic process; GO:0006725 cellular aromatic compound metabolic process; GO:0006732 coenzyme metabolic process; GO:0006733 oxidoreduction coenzyme metabolic process; GO:0006739 NADP metabolic process; GO:0006740 NADPH regeneration; GO:0006753 nucleoside phosphate metabolic process; GO:0006793 phosphorus metabolic process; GO:0006796 phosphate-containin…		GO:0003824 catalytic activity; GO:0016491 oxidoreductase activity;						S	KOG2742	Predicted oxidoreductase
Capana01g001648	"PAP12_ARATH Probable plastid-lipid-associated protein 12, chloroplastic OS=Arabidopsis thaliana GN=PAP12 PE=2 SV=1"	PAP12	nucleus		GO:0005622 intracellular; GO:0005623 cell; GO:0005737 cytoplasm; GO:0009507 chloroplast; GO:0009526 plastid envelope; GO:0009534 chloroplast thylakoid; GO:0009535 chloroplast thylakoid membrane; GO:0009536 plastid; GO:0009579 thylakoid; GO:0009941 chloroplast envelope; GO:0016020 membrane; GO:0031967 organelle envelope; GO:0031975 envelope; GO:0031976 plastid thylakoid; GO:0031984 organelle subco…
Capana01g001681	DFRA_DIACA Dihydroflavonol-4-reductase OS=Dianthus caryophyllus GN=A PE=2 SV=1	A	chloroplast									V	KOG1502	Flavonol reductase/cinnamoyl-CoA reductase
Capana01g001682	DFRA_DIACA Dihydroflavonol-4-reductase OS=Dianthus caryophyllus GN=A PE=2 SV=1	A	chloroplast									V	KOG1502	Flavonol reductase/cinnamoyl-CoA reductase
Capana01g001716	"protein EMBRYO SAC DEVELOPMENT ARREST 3, chloroplastic-like"	---	chloroplast	GO:0006091 generation of precursor metabolites and energy; GO:0006996 organelle organization; GO:0007275 multicellular organism development; GO:0008152 metabolic process; GO:0009553 embryo sac development; GO:0009561 megagametogenesis; GO:0009657 plastid organization; GO:0009668 plastid membrane organization; GO:0009987 cellular process; GO:0010027 thylakoid membrane organization; GO:0015979 phot…	GO:0005622 intracellular; GO:0005623 cell; GO:0005737 cytoplasm; GO:0009507 chloroplast; GO:0009534 chloroplast thylakoid; GO:0009535 chloroplast thylakoid membrane; GO:0009536 plastid; GO:0009579 thylakoid; GO:0016020 membrane; GO:0031976 plastid thylakoid; GO:0031977 thylakoid lumen; GO:0031984 organelle subcompartment; GO:0034357 photosynthetic membrane; GO:0042651 thylakoid membrane; GO:00432…	GO:0003824 catalytic activity; GO:0015036 disulfide oxidoreductase activity; GO:0016491 oxidoreductase activity; GO:0016651 oxidoreductase activity, acting on NAD(P)H; GO:0016667 oxidoreductase activity, acting on a sulfur group of donors; GO:0016668 oxidoreductase activity, acting on a sulfur group of donors, NAD(P) as acceptor; GO:0047134 protein-disulfide reductase activity;
Capana01g001805	AGO4_ARATH Protein argonaute 4 OS=Arabidopsis thaliana GN=AGO4 PE=1 SV=2	AGO4	nucleus	GO:0000003 reproduction; GO:0002252 immune effector process; GO:0002376 immune system process; GO:0003006 developmental process involved in reproduction; GO:0006139 nucleobase-containing compound metabolic process; GO:0006259 DNA metabolic process; GO:0006304 DNA modification; GO:0006305 DNA alkylation; GO:0006306 DNA methylation; GO:0006325 chromatin organization; GO:0006342 chromatin silencing;…	GO:0000228 nuclear chromosome; GO:0000785 chromatin; GO:0000790 nuclear chromatin; GO:0000791 euchromatin; GO:0005622 intracellular; GO:0005623 cell; GO:0005634 nucleus; GO:0005654 nucleoplasm; GO:0005694 chromosome; GO:0005719 nuclear euchromatin; GO:0005730 nucleolus; GO:0005737 cytoplasm; GO:0015030 Cajal body; GO:0016604 nuclear body; GO:0031974 membrane-enclosed lumen; GO:0031981 nuclear lum…	GO:0003676 nucleic acid binding; GO:0003682 chromatin binding; GO:0003723 RNA binding; GO:0003824 catalytic activity; GO:0004518 nuclease activity; GO:0004519 endonuclease activity; GO:0004521 endoribonuclease activity; GO:0004540 ribonuclease activity; GO:0005488 binding; GO:0016787 hydrolase activity; GO:0016788 hydrolase activity, acting on ester bonds; GO:0035197 siRNA binding; GO:0035198 miR…	K11593	ELF2C, AGO; eukaryotic translation initiation factor 2C		PF08699; PF02170	Domain of unknown function (DUF1785); PAZ domain	J	KOG1041	Translation initiation factor 2C (eIF-2C) and related proteins
Capana01g001814	"ISPE_SOLLC 4-diphosphocytidyl-2-C-methyl-D-erythritol kinase, chloroplastic/chromoplastic (Fragment) OS=Solanum lycopersicum GN=ISPE PE=1 SV=1"	ISPE	chloroplast	GO:0006793 phosphorus metabolic process; GO:0006796 phosphate-containing compound metabolic process; GO:0008152 metabolic process; GO:0009987 cellular process; GO:0016310 phosphorylation; GO:0044237 cellular metabolic process;	GO:0005622 intracellular; GO:0005623 cell; GO:0005737 cytoplasm; GO:0009507 chloroplast; GO:0009509 chromoplast; GO:0009536 plastid; GO:0043226 organelle; GO:0043227 membrane-bounded organelle; GO:0043229 intracellular organelle; GO:0043231 intracellular membrane-bounded organelle; GO:0044424 intracellular part; GO:0044444 cytoplasmic part; GO:0044464 cell part;	GO:0003824 catalytic activity; GO:0016301 kinase activity; GO:0016740 transferase activity; GO:0016772 transferase activity, transferring phosphorus-containing groups; GO:0016773 phosphotransferase activity, alcohol group as acceptor; GO:0050515 4-(cytidine 5'-diphospho)-2-C-methyl-D-erythritol kinase activity;	K00919	ispE; 4-diphosphocytidyl-2-C-methyl-D-erythritol kinase [EC:2.7.1.148]	cann00900 Terpenoid backbone biosynthesis; cann01100 Metabolic pathways; cann01110 Biosynthesis of secondary metabolites
Capana01g001826	CNX1_ARATH Molybdopterin biosynthesis protein CNX1 OS=Arabidopsis thaliana GN=CNX1 PE=1 SV=2	CNX1	chloroplast	GO:0006139 nucleobase-containing compound metabolic process; GO:0006163 purine nucleotide metabolic process; GO:0006464 cellular protein modification process; GO:0006725 cellular aromatic compound metabolic process; GO:0006732 coenzyme metabolic process; GO:0006753 nucleoside phosphate metabolic process; GO:0006793 phosphorus metabolic process; GO:0006796 phosphate-containing compound metabolic p…	GO:0005622 intracellular; GO:0005623 cell; GO:0005737 cytoplasm; GO:0005829 cytosol; GO:0044424 intracellular part; GO:0044444 cytoplasmic part; GO:0044464 cell part;	GO:0003824 catalytic activity; GO:0005488 binding; GO:0008940 nitrate reductase activity; GO:0016491 oxidoreductase activity; GO:0016661 oxidoreductase activity, acting on other nitrogenous compounds as donors; GO:0016740 transferase activity; GO:0016772 transferase activity, transferring phosphorus-containing groups; GO:0016779 nucleotidyltransferase activity; GO:0030151 molybdenum ion binding; …	K15376	GPHN; gephyrin [EC:2.10.1.1 2.7.7.75]	cann00790 Folate biosynthesis; cann01100 Metabolic pathways	PF00994; PF03454	Probable molybdopterin binding domain; MoeA C-terminal region (domain IV)	H	KOG2371	Molybdopterin biosynthesis protein
Capana01g001833	SRRT_ARATH Serrate RNA effector molecule OS=Arabidopsis thaliana GN=SE PE=1 SV=2	SE	nucleus	GO:0000381 regulation of alternative mRNA splicing, via spliceosome; GO:0006139 nucleobase-containing compound metabolic process; GO:0006355 regulation of transcription, DNA-templated; GO:0006396 RNA processing; GO:0006725 cellular aromatic compound metabolic process; GO:0006807 nitrogen compound metabolic process; GO:0007275 multicellular organism development; GO:0008152 metabolic process; GO:00…	GO:0005622 intracellular; GO:0005623 cell; GO:0005634 nucleus; GO:0005654 nucleoplasm; GO:0005730 nucleolus; GO:0005737 cytoplasm; GO:0005829 cytosol; GO:0005846 nuclear cap binding complex; GO:0009507 chloroplast; GO:0009536 plastid; GO:0010445 nuclear dicing body; GO:0016604 nuclear body; GO:0016607 nuclear speck; GO:0031974 membrane-enclosed lumen; GO:0031981 nuclear lumen; GO:0032991 macromol…	GO:0003676 nucleic acid binding; GO:0003677 DNA binding; GO:0003700 transcription factor activity, sequence-specific DNA binding; GO:0005488 binding; GO:0097159 organic cyclic compound binding; GO:1901363 heterocyclic compound binding;						A	KOG2295	C2H2 Zn-finger protein
Capana01g001835	METE_CATRO 5-methyltetrahydropteroyltriglutamate--homocysteine methyltransferase OS=Catharanthus roseus GN=METE PE=2 SV=1	METE	cytoplasm	GO:0000096 sulfur amino acid metabolic process; GO:0000097 sulfur amino acid biosynthetic process; GO:0006082 organic acid metabolic process; GO:0006520 cellular amino acid metabolic process; GO:0006555 methionine metabolic process; GO:0006790 sulfur compound metabolic process; GO:0006807 nitrogen compound metabolic process; GO:0008152 metabolic process; GO:0008652 cellular amino acid biosyntheti…	GO:0005576 extracellular region; GO:0005622 intracellular; GO:0005623 cell; GO:0005737 cytoplasm; GO:0005829 cytosol; GO:0009507 chloroplast; GO:0009536 plastid; GO:0043226 organelle; GO:0043227 membrane-bounded organelle; GO:0043229 intracellular organelle; GO:0043231 intracellular membrane-bounded organelle; GO:0044424 intracellular part; GO:0044444 cytoplasmic part; GO:0044464 cell part;	GO:0003824 catalytic activity; GO:0003871 5-methyltetrahydropteroyltriglutamate-homocysteine S-methyltransferase activity; GO:0008168 methyltransferase activity; GO:0008172 S-methyltransferase activity; GO:0008705 methionine synthase activity; GO:0016740 transferase activity; GO:0016741 transferase activity, transferring one-carbon groups; GO:0042084 5-methyltetrahydrofolate-dependent methyltrans…	K00549	metE; 5-methyltetrahydropteroyltriglutamate--homocysteine methyltransferase [EC:2.1.1.14]	cann00270 Cysteine and methionine metabolism; cann00450 Selenocompound metabolism; cann01100 Metabolic pathways; cann01110 Biosynthesis of secondary metabolites; cann01230 Biosynthesis of amino acids	PF08267; PF01717	Cobalamin-independent synthase, N-terminal domain; Cobalamin-independent synthase, Catalytic domain	E	KOG2263	Methionine synthase II (cobalamin-independent)
Capana01g001952	IF5A4_SOLTU Eukaryotic translation initiation factor 5A-4 OS=Solanum tuberosum GN=EIF5A4 PE=2 SV=1	EIF5A4	cytoplasm				K03263	EIF5A; translation initiation factor 5A		PF01287	Eukaryotic elongation factor 5A hypusine, DNA-binding OB fold	J	KOG3271	Translation initiation factor 5A (eIF-5A)
Capana01g001997	Amidohydro-rel domain-containing protein	---	chloroplast							PF04909	Amidohydrolase
Capana01g002007	"CP20B_ARATH Peptidyl-prolyl cis-trans isomerase CYP20-2, chloroplastic OS=Arabidopsis thaliana GN=CYP20-2 PE=1 SV=1"	CYP20-2	chloroplast	GO:0000413 protein peptidyl-prolyl isomerization; GO:0006464 cellular protein modification process; GO:0006807 nitrogen compound metabolic process; GO:0008152 metabolic process; GO:0009987 cellular process; GO:0010275 NAD(P)H dehydrogenase complex assembly; GO:0016043 cellular component organization; GO:0018193 peptidyl-amino acid modification; GO:0018208 peptidyl-proline modification; GO:0019538…	GO:0005622 intracellular; GO:0005623 cell; GO:0005737 cytoplasm; GO:0009507 chloroplast; GO:0009532 plastid stroma; GO:0009533 chloroplast stromal thylakoid; GO:0009534 chloroplast thylakoid; GO:0009535 chloroplast thylakoid membrane; GO:0009536 plastid; GO:0009570 chloroplast stroma; GO:0009579 thylakoid; GO:0016020 membrane; GO:0031976 plastid thylakoid; GO:0031977 thylakoid lumen; GO:0031984 o…	GO:0003755 peptidyl-prolyl cis-trans isomerase activity; GO:0003824 catalytic activity; GO:0005488 binding; GO:0005515 protein binding; GO:0016853 isomerase activity; GO:0016859 cis-trans isomerase activity; GO:0019899 enzyme binding; GO:0019900 kinase binding; GO:0019901 protein kinase binding; GO:0043424 protein histidine kinase binding;	K03768	PPIB, ppiB; peptidyl-prolyl cis-trans isomerase B (cyclophilin B) [EC:5.2.1.8]		PF00160	Cyclophilin type peptidyl-prolyl cis-trans isomerase/CLD	O	KOG0880	Peptidyl-prolyl cis-trans isomerase
Capana01g002025	"RUBB_PEA RuBisCO large subunit-binding protein subunit beta, chloroplastic OS=Pisum sativum PE=1 SV=2"	---	chloroplast	GO:0002376 immune system process; GO:0006457 protein folding; GO:0006458 'de novo' protein folding; GO:0006950 response to stress; GO:0006952 defense response; GO:0006955 immune response; GO:0006996 organelle organization; GO:0007005 mitochondrion organization; GO:0008219 cell death; GO:0009266 response to temperature stimulus; GO:0009409 response to cold; GO:0009605 response to external stimulus…	GO:0005576 extracellular region; GO:0005622 intracellular; GO:0005623 cell; GO:0005634 nucleus; GO:0005730 nucleolus; GO:0005737 cytoplasm; GO:0005739 mitochondrion; GO:0005829 cytosol; GO:0005840 ribosome; GO:0005886 plasma membrane; GO:0009507 chloroplast; GO:0009526 plastid envelope; GO:0009532 plastid stroma; GO:0009536 plastid; GO:0009570 chloroplast stroma; GO:0009941 chloroplast envelope; …	GO:0005488 binding; GO:0005515 protein binding; GO:0019904 protein domain specific binding; GO:0044183 protein binding involved in protein folding; GO:0051082 unfolded protein binding;	K04077	groEL, HSPD1; chaperonin GroEL	cann03018 RNA degradation			O	KOG0356	Mitochondrial chaperonin, Cpn60/Hsp60p
Capana01g002050	YTHD2_HUMAN YTH domain family protein 2 OS=Homo sapiens GN=YTHDF2 PE=1 SV=2	YTHDF2	nucleus				K20102	YTHDF; YTH domain-containing family protein		PF04146	YT521-B-like domain	S	KOG1901	Uncharacterized high-glucose-regulated protein
Capana01g002077	"KPYC_TOBAC Pyruvate kinase, cytosolic isozyme OS=Nicotiana tabacum PE=2 SV=1"	---	cytoplasm	GO:0005975 carbohydrate metabolic process; GO:0006082 organic acid metabolic process; GO:0006090 pyruvate metabolic process; GO:0006091 generation of precursor metabolites and energy; GO:0006096 glycolytic process; GO:0006139 nucleobase-containing compound metabolic process; GO:0006163 purine nucleotide metabolic process; GO:0006164 purine nucleotide biosynthetic process; GO:0006165 nucleoside di…	GO:0005622 intracellular; GO:0005623 cell; GO:0005737 cytoplasm; GO:0044424 intracellular part; GO:0044464 cell part;	GO:0003824 catalytic activity; GO:0004743 pyruvate kinase activity; GO:0016740 transferase activity; GO:0016772 transferase activity, transferring phosphorus-containing groups; GO:0016773 phosphotransferase activity, alcohol group as acceptor;	K00873	PK, pyk; pyruvate kinase [EC:2.7.1.40]	cann00010 Glycolysis / Gluconeogenesis; cann00230 Purine metabolism; cann00620 Pyruvate metabolism; cann01100 Metabolic pathways; cann01110 Biosynthesis of secondary metabolites; cann01200 Carbon metabolism; cann01230 Biosynthesis of amino acids	PF02887	Pyruvate kinase, alpha/beta domain	G	KOG2323	Pyruvate kinase
Capana01g002103	Putative ATP-dependent RNA helicase A-like	---	nucleus
Capana01g002147	PRS8A_ARATH 26S protease regulatory subunit 8 homolog A OS=Arabidopsis thaliana GN=RPT6A PE=2 SV=1	RPT6A	cytoplasm				K03066	PSMC5, RPT6; 26S proteasome regulatory subunit T6	cann03050 Proteasome	PF00004	ATPase family associated with various cellular activities (AAA)	O	KOG0728	26S proteasome regulatory complex, ATPase RPT6
Capana01g002187	RS92_ARATH 40S ribosomal protein S9-2 OS=Arabidopsis thaliana GN=RPS9C PE=2 SV=1	RPS9C	cytoplasm				K02997	RP-S9e, RPS9; small subunit ribosomal protein S9e	cann03010 Ribosome	PF01479	S4 domain	J	KOG3301	Ribosomal protein S4
Capana01g002192	VDAC2_SOLTU Mitochondrial outer membrane protein porin of 36 kDa OS=Solanum tuberosum PE=1 SV=2	---	cytoplasm	GO:0006810 transport; GO:0006811 ion transport; GO:0006820 anion transport; GO:0015698 inorganic anion transport; GO:0034220 ion transmembrane transport; GO:0051179 localization; GO:0051234 establishment of localization; GO:0055085 transmembrane transport; GO:0098656 anion transmembrane transport;	GO:0005622 intracellular; GO:0005623 cell; GO:0005737 cytoplasm; GO:0005739 mitochondrion; GO:0005740 mitochondrial envelope; GO:0005741 mitochondrial outer membrane; GO:0009526 plastid envelope; GO:0009527 plastid outer membrane; GO:0009536 plastid; GO:0016020 membrane; GO:0016021 integral component of membrane; GO:0019867 outer membrane; GO:0031090 organelle membrane; GO:0031224 intrinsic compo…	GO:0005215 transporter activity; GO:0005216 ion channel activity; GO:0005244 voltage-gated ion channel activity; GO:0005253 anion channel activity; GO:0008308 voltage-gated anion channel activity; GO:0008509 anion transmembrane transporter activity; GO:0015075 ion transmembrane transporter activity; GO:0015103 inorganic anion transmembrane transporter activity; GO:0015267 channel activity; GO:001…	K15040	VDAC2; voltage-dependent anion channel protein 2				P	KOG3126	Porin/voltage-dependent anion-selective channel protein
Capana01g002258	GALK1_ARATH Galactokinase OS=Arabidopsis thaliana GN=GAL1 PE=1 SV=2	GAL1	cytoskeleton	GO:0005975 carbohydrate metabolic process; GO:0005996 monosaccharide metabolic process; GO:0006012 galactose metabolic process; GO:0006793 phosphorus metabolic process; GO:0006796 phosphate-containing compound metabolic process; GO:0008152 metabolic process; GO:0009987 cellular process; GO:0016310 phosphorylation; GO:0019318 hexose metabolic process; GO:0044237 cellular metabolic process; GO:0044…	GO:0005622 intracellular; GO:0005623 cell; GO:0005737 cytoplasm; GO:0005829 cytosol; GO:0044424 intracellular part; GO:0044444 cytoplasmic part; GO:0044464 cell part;	GO:0003824 catalytic activity; GO:0004335 galactokinase activity; GO:0016301 kinase activity; GO:0016740 transferase activity; GO:0016772 transferase activity, transferring phosphorus-containing groups; GO:0016773 phosphotransferase activity, alcohol group as acceptor; GO:0019200 carbohydrate kinase activity;	K18674	GALK2; N-acetylgalactosamine kinase [EC:2.7.1.157]		PF10509	Galactokinase galactose-binding signature	G	KOG0631	Galactokinase
Capana01g002263	"AEE7_ARATH Acetate/butyrate--CoA ligase AAE7, peroxisomal OS=Arabidopsis thaliana GN=AAE7 PE=1 SV=1"	AAE7	chloroplast	GO:0005975 carbohydrate metabolic process; GO:0006081 cellular aldehyde metabolic process; GO:0006082 organic acid metabolic process; GO:0006083 acetate metabolic process; GO:0006097 glyoxylate cycle; GO:0006629 lipid metabolic process; GO:0006631 fatty acid metabolic process; GO:0008152 metabolic process; GO:0009987 cellular process; GO:0016999 antibiotic metabolic process; GO:0017144 drug metab…	GO:0005622 intracellular; GO:0005623 cell; GO:0005737 cytoplasm; GO:0005777 peroxisome; GO:0042579 microbody; GO:0043226 organelle; GO:0043227 membrane-bounded organelle; GO:0043229 intracellular organelle; GO:0043231 intracellular membrane-bounded organelle; GO:0044424 intracellular part; GO:0044444 cytoplasmic part; GO:0044464 cell part;	GO:0003824 catalytic activity; GO:0003987 acetate-CoA ligase activity; GO:0016405 CoA-ligase activity; GO:0016874 ligase activity; GO:0016877 ligase activity, forming carbon-sulfur bonds; GO:0016878 acid-thiol ligase activity; GO:0047760 butyrate-CoA ligase activity;	K01913	cann00010 Glycolysis / Gluconeogenesis; cann00620 Pyruvate metabolism; cann00630 Glyoxylate and dicarboxylate metabolism; cann00650 Butanoate metabolism; cann01100 Metabolic pathways; cann01110 Biosynthesis of secondary metabolites; cann01200 Carbon metabolism		PF13193	Domain of unknown function (DUF4009)	I	KOG1176	Acyl-CoA synthetase
Capana01g002320	ACLB1_ORYSJ ATP-citrate synthase beta chain protein 1 OS=Oryza sativa subsp. japonica GN=ACLB-1 PE=2 SV=1	ACLB-1	chloroplast	GO:0006084 acetyl-CoA metabolic process; GO:0006085 acetyl-CoA biosynthetic process; GO:0006139 nucleobase-containing compound metabolic process; GO:0006163 purine nucleotide metabolic process; GO:0006164 purine nucleotide biosynthetic process; GO:0006637 acyl-CoA metabolic process; GO:0006725 cellular aromatic compound metabolic process; GO:0006732 coenzyme metabolic process; GO:0006753 nucleosi…	GO:0005622 intracellular; GO:0005623 cell; GO:0005737 cytoplasm; GO:0005829 cytosol; GO:0005886 plasma membrane; GO:0009346 citrate lyase complex; GO:0016020 membrane; GO:0032991 macromolecular complex; GO:0044424 intracellular part; GO:0044444 cytoplasmic part; GO:0044464 cell part; GO:0071944 cell periphery;	GO:0003824 catalytic activity; GO:0003878 ATP citrate synthase activity; GO:0016740 transferase activity; GO:0016746 transferase activity, transferring acyl groups; GO:0046912 transferase activity, transferring acyl groups, acyl groups converted into alkyl on transfer;	K01648	ACLY; ATP citrate (pro-S)-lyase [EC:2.3.3.8]	cann00020 Citrate cycle (TCA cycle); cann01100 Metabolic pathways; cann01110 Biosynthesis of secondary metabolites	PF00549; PF00285	CoA-ligase; Citrate synthase	C	KOG1254	ATP-citrate lyase
Capana01g002363	TPR_REGION domain-containing protein	---	nucleus	GO:0000226 microtubule cytoskeleton organization; GO:0001578 microtubule bundle formation; GO:0006996 organelle organization; GO:0007010 cytoskeleton organization; GO:0007017 microtubule-based process; GO:0009987 cellular process; GO:0016043 cellular component organization; GO:0022607 cellular component assembly; GO:0030030 cell projection organization; GO:0030031 cell projection assembly; GO:003…	GO:0005622 intracellular; GO:0005623 cell; GO:0005737 cytoplasm; GO:0005829 cytosol; GO:0044424 intracellular part; GO:0044444 cytoplasmic part; GO:0044464 cell part;							S	KOG1124	FOG: TPR repeat
Capana01g002397	"RR1_SPIOL 30S ribosomal protein S1, chloroplastic OS=Spinacia oleracea GN=RPS1 PE=1 SV=1"	RPS1	chloroplast	GO:0009719 response to endogenous stimulus; GO:0009725 response to hormone; GO:0009735 response to cytokinin; GO:0010033 response to organic substance; GO:0042221 response to chemical; GO:0050896 response to stimulus;	GO:0005622 intracellular; GO:0005623 cell; GO:0005737 cytoplasm; GO:0009507 chloroplast; GO:0009532 plastid stroma; GO:0009536 plastid; GO:0009570 chloroplast stroma; GO:0009579 thylakoid; GO:0016020 membrane; GO:0043226 organelle; GO:0043227 membrane-bounded organelle; GO:0043229 intracellular organelle; GO:0043231 intracellular membrane-bounded organelle; GO:0044422 organelle part; GO:0044424 i…	GO:0003676 nucleic acid binding; GO:0003723 RNA binding; GO:0003729 mRNA binding; GO:0005488 binding; GO:0097159 organic cyclic compound binding; GO:1901363 heterocyclic compound binding;	K02945	RP-S1, rpsA; small subunit ribosomal protein S1	cann03010 Ribosome	PF00575	S1 RNA binding domain
Capana01g002398	"CB5_ARATH Chlorophyll a-b binding protein CP26, chloroplastic OS=Arabidopsis thaliana GN=LHCB5 PE=2 SV=1"	LHCB5	chloroplast				K08916	LHCB5; light-harvesting complex II chlorophyll a/b binding protein 5	cann00196 Photosynthesis - antenna proteins; cann01100 Metabolic pathways
Capana01g002411	RL7A2_ARATH 60S ribosomal protein L7a-2 OS=Arabidopsis thaliana GN=RPL7AB PE=1 SV=1	RPL7AB	cytoplasm				K02936	RP-L7Ae, RPL7A; large subunit ribosomal protein L7Ae	cann03010 Ribosome	PF01248	Ribosomal protein L7Ae/L30e/S12e/Gadd45 family	J	KOG3166	60S ribosomal protein L7A
Capana01g002433	Putative transmembrane protein 41B-like	---	chloroplast									S	KOG3140	Predicted membrane protein
Capana01g002460	"ODB2_HUMAN Lipoamide acyltransferase component of branched-chain alpha-keto acid dehydrogenase complex, mitochondrial OS=Homo sapiens GN=DBT PE=1 SV=3"	DBT	chloroplast	GO:0006950 response to stress; GO:0007154 cell communication; GO:0009267 cellular response to starvation; GO:0009314 response to radiation; GO:0009416 response to light stimulus; GO:0009605 response to external stimulus; GO:0009628 response to abiotic stimulus; GO:0009642 response to light intensity; GO:0009646 response to absence of light; GO:0009743 response to carbohydrate; GO:0009744 response…	GO:0005622 intracellular; GO:0005623 cell; GO:0005737 cytoplasm; GO:0005739 mitochondrion; GO:0005759 mitochondrial matrix; GO:0005947 mitochondrial alpha-ketoglutarate dehydrogenase complex; GO:0009295 nucleoid; GO:0030062 mitochondrial tricarboxylic acid cycle enzyme complex; GO:0031974 membrane-enclosed lumen; GO:0032991 macromolecular complex; GO:0042645 mitochondrial nucleoid; GO:0043226 org…	GO:0003824 catalytic activity; GO:0004147 dihydrolipoamide branched chain acyltransferase activity; GO:0005488 binding; GO:0005515 protein binding; GO:0008270 zinc ion binding; GO:0016407 acetyltransferase activity; GO:0016417 S-acyltransferase activity; GO:0016740 transferase activity; GO:0016746 transferase activity, transferring acyl groups; GO:0016747 transferase activity, transferring acyl g…	K09699	DBT, bkdB; 2-oxoisovalerate dehydrogenase E2 component (dihydrolipoyl transacylase) [EC:2.3.1.168]	cann00280 Valine, leucine and isoleucine degradation; cann00640 Propanoate metabolism; cann01100 Metabolic pathways; cann01110 Biosynthesis of secondary metabolites	PF00364; PF00198	Biotin-requiring enzyme; 2-oxoacid dehydrogenases acyltransferase (catalytic domain)	I	KOG0558	Dihydrolipoamide transacylase (alpha-keto acid dehydrogenase E2 subunit)
Capana01g002514	IF2G_CHICK Eukaryotic translation initiation factor 2 subunit 3 OS=Gallus gallus GN=EIF2S3 PE=1 SV=1	EIF2S3	cytoplasm	GO:0006412 translation; GO:0006413 translational initiation; GO:0006518 peptide metabolic process; GO:0006807 nitrogen compound metabolic process; GO:0006810 transport; GO:0008152 metabolic process; GO:0009058 biosynthetic process; GO:0009059 macromolecule biosynthetic process; GO:0009987 cellular process; GO:0010467 gene expression; GO:0019538 protein metabolic process; GO:0034641 cellular nitro…	GO:0005622 intracellular; GO:0005623 cell; GO:0005737 cytoplasm; GO:0005829 cytosol; GO:0005850 eukaryotic translation initiation factor 2 complex; GO:0032991 macromolecular complex; GO:0044424 intracellular part; GO:0044444 cytoplasmic part; GO:0044464 cell part;	GO:0003676 nucleic acid binding; GO:0003723 RNA binding; GO:0003743 translation initiation factor activity; GO:0003824 catalytic activity; GO:0003924 GTPase activity; GO:0005488 binding; GO:0008135 translation factor activity, RNA binding; GO:0016462 pyrophosphatase activity; GO:0016787 hydrolase activity; GO:0016817 hydrolase activity, acting on acid anhydrides; GO:0016818 hydrolase activity, ac…	K03242	EIF2S3; translation initiation factor 2 subunit 3	cann03013 RNA transport	PF00009; PF03144; PF09173	Elongation factor Tu GTP binding domain; Elongation factor Tu domain 2; Initiation factor eIF2 gamma, C terminal	J	KOG0466	Translation initiation factor 2, gamma subunit (eIF-2gamma; GTPase)
Capana01g002562	SUGP1_ARATH SURP and G-patch domain-containing protein 1-like protein OS=Arabidopsis thaliana GN=At3g52120 PE=2 SV=1	At3g52120	nucleus				K13096	SF4; splicing factor 4				S	KOG0965	Predicted RNA-binding protein, contains SWAP and G-patch domains
Capana01g002586	"TL19_ARATH Thylakoid lumenal 19 kDa protein, chloroplastic OS=Arabidopsis thaliana GN=At3g63540 PE=1 SV=2"	At3g63540	chloroplast							PF01789	PsbP
Capana01g002599	"ATPO_IPOBA ATP synthase subunit O, mitochondrial OS=Ipomoea batatas PE=1 SV=1"	---	chloroplast		GO:0005622 intracellular; GO:0005623 cell; GO:0005737 cytoplasm; GO:0005739 mitochondrion; GO:0005740 mitochondrial envelope; GO:0005743 mitochondrial inner membrane; GO:0005753 mitochondrial proton-transporting ATP synthase complex; GO:0005886 plasma membrane; GO:0009507 chloroplast; GO:0009536 plastid; GO:0016020 membrane; GO:0016469 proton-transporting two-sector ATPase complex; GO:0019866 org…	GO:0005488 binding; GO:0008270 zinc ion binding; GO:0043167 ion binding; GO:0043169 cation binding; GO:0046872 metal ion binding; GO:0046914 transition metal ion binding; GO:0050897 cobalt ion binding;	K02137	ATPeF0O, ATP5O, ATP5; F-type H+-transporting ATPase subunit O	cann00190 Oxidative phosphorylation; cann01100 Metabolic pathways			C	KOG1662	Mitochondrial F1F0-ATP synthase, subunit OSCP/ATP5
Capana01g002602	RL6_MESCR 60S ribosomal protein L6 OS=Mesembryanthemum crystallinum GN=RPL6 PE=2 SV=1	RPL6	cytoplasm				K02934	RP-L6e, RPL6; large subunit ribosomal protein L6e	cann03010 Ribosome	PF03868	Ribosomal protein L6, N-terminal domain	J	KOG1694	60s ribosomal protein L6
Capana01g002623	"CCD1_PHAVU Carotenoid 9,10(9',10')-cleavage dioxygenase 1 OS=Phaseolus vulgaris GN=CCD1 PE=1 SV=1"	CCD1	nucleus	GO:0006629 lipid metabolic process; GO:0006720 isoprenoid metabolic process; GO:0006721 terpenoid metabolic process; GO:0008152 metabolic process; GO:0008300 isoprenoid catabolic process; GO:0009056 catabolic process; GO:0009987 cellular process; GO:0016042 lipid catabolic process; GO:0016108 tetraterpenoid metabolic process; GO:0016110 tetraterpenoid catabolic process; GO:0016115 terpenoid catab…	GO:0005622 intracellular; GO:0005623 cell; GO:0005737 cytoplasm; GO:0005773 vacuole; GO:0005774 vacuolar membrane; GO:0005794 Golgi apparatus; GO:0005886 plasma membrane; GO:0005911 cell-cell junction; GO:0009506 plasmodesma; GO:0012505 endomembrane system; GO:0016020 membrane; GO:0030054 cell junction; GO:0031090 organelle membrane; GO:0043226 organelle; GO:0043227 membrane-bounded organelle; GO…	GO:0003824 catalytic activity; GO:0010436 carotenoid dioxygenase activity; GO:0016491 oxidoreductase activity; GO:0016701 oxidoreductase activity, acting on single donors with incorporation of molecular oxygen; GO:0016702 oxidoreductase activity, acting on single donors with incorporation of molecular oxygen, incorporation of two atoms of oxygen; GO:0045549 9-cis-epoxycarotenoid dioxygenase activ…	K00465					Q	KOG1285	Beta, beta-carotene 15,15'-dioxygenase and related enzymes
Capana01g002634	"FTRV_MAIZE Ferredoxin-thioredoxin reductase, variable chain OS=Zea mays PE=1 SV=1"	---	chloroplast	GO:0008152 metabolic process; GO:0055114 oxidation-reduction process;	GO:0005622 intracellular; GO:0005623 cell; GO:0005737 cytoplasm; GO:0009507 chloroplast; GO:0009536 plastid; GO:0043226 organelle; GO:0043227 membrane-bounded organelle; GO:0043229 intracellular organelle; GO:0043231 intracellular membrane-bounded organelle; GO:0044424 intracellular part; GO:0044444 cytoplasmic part; GO:0044464 cell part;					PF02941	Ferredoxin thioredoxin reductase variable alpha chain	H	KOG2672	Lipoate synthase
Capana01g002678	"RK1_ARATH 50S ribosomal protein L1, chloroplastic OS=Arabidopsis thaliana GN=RPL1 PE=1 SV=1"	RPL1	chloroplast	GO:0000470 maturation of LSU-rRNA; GO:0006139 nucleobase-containing compound metabolic process; GO:0006364 rRNA processing; GO:0006396 RNA processing; GO:0006412 translation; GO:0006518 peptide metabolic process; GO:0006725 cellular aromatic compound metabolic process; GO:0006807 nitrogen compound metabolic process; GO:0008152 metabolic process; GO:0009058 biosynthetic process; GO:0009059 macromo…	GO:0005622 intracellular; GO:0005623 cell; GO:0005634 nucleus; GO:0005737 cytoplasm; GO:0005829 cytosol; GO:0005840 ribosome; GO:0009507 chloroplast; GO:0009526 plastid envelope; GO:0009532 plastid stroma; GO:0009534 chloroplast thylakoid; GO:0009535 chloroplast thylakoid membrane; GO:0009536 plastid; GO:0009570 chloroplast stroma; GO:0009579 thylakoid; GO:0009941 chloroplast envelope; GO:0015934…	GO:0003676 nucleic acid binding; GO:0003723 RNA binding; GO:0005488 binding; GO:0097159 organic cyclic compound binding; GO:1901363 heterocyclic compound binding;	K02863	RP-L1, MRPL1, rplA; large subunit ribosomal protein L1	cann03010 Ribosome	PF00687	Ribosomal protein L1p/L10e family	J	KOG1569	50S ribosomal protein L1
Capana01g002681	"protein RETICULATA-RELATED 4, chloroplastic-like"	---	chloroplast
Capana01g002684	NAA11_MOUSE N-alpha-acetyltransferase 11 OS=Mus musculus GN=Naa11 PE=2 SV=1	Naa11	cytoplasm	GO:0000003 reproduction; GO:0001101 response to acid chemical; GO:0003006 developmental process involved in reproduction; GO:0006464 cellular protein modification process; GO:0006473 protein acetylation; GO:0006474 N-terminal protein amino acid acetylation; GO:0006475 internal protein amino acid acetylation; GO:0006807 nitrogen compound metabolic process; GO:0006950 response to stress; GO:0007275…	GO:0005622 intracellular; GO:0005623 cell; GO:0005737 cytoplasm; GO:0005829 cytosol; GO:0005840 ribosome; GO:0022626 cytosolic ribosome; GO:0031248 protein acetyltransferase complex; GO:0031414 N-terminal protein acetyltransferase complex; GO:0031415 NatA complex; GO:0032991 macromolecular complex; GO:0043226 organelle; GO:0043228 non-membrane-bounded organelle; GO:0043229 intracellular organelle…	GO:0003824 catalytic activity; GO:0004596 peptide alpha-N-acetyltransferase activity; GO:0008080 N-acetyltransferase activity; GO:0016407 acetyltransferase activity; GO:0016410 N-acyltransferase activity; GO:0016740 transferase activity; GO:0016746 transferase activity, transferring acyl groups; GO:0016747 transferase activity, transferring acyl groups other than amino-acyl groups; GO:0034212 pep…	K20791	NAA10_11, ARD1_2; N-alpha-acetyltransferase 10/11 [EC:2.3.1.255]				S	KOG3235	Subunit of the major N alpha-acetyltransferase
Capana01g002705	SC31A_CHICK Protein transport protein Sec31A OS=Gallus gallus GN=SEC31A PE=2 SV=1	SEC31A	chloroplast		GO:0005622 intracellular; GO:0005623 cell; GO:0005737 cytoplasm; GO:0005829 cytosol; GO:0005911 cell-cell junction; GO:0009506 plasmodesma; GO:0016020 membrane; GO:0030054 cell junction; GO:0044424 intracellular part; GO:0044444 cytoplasmic part; GO:0044464 cell part; GO:0055044 symplast;		K14005	SEC31; protein transport protein SEC31	cann04141 Protein processing in endoplasmic reticulum	PF12931	Sec23-binding domain of Sec16	U	KOG0307	Vesicle coat complex COPII, subunit SEC31
Capana01g002717	UBP24_ARATH Ubiquitin carboxyl-terminal hydrolase 24 OS=Arabidopsis thaliana GN=UBP24 PE=1 SV=1	UBP24	cytoplasm				K11841	USP10, UBP3; ubiquitin carboxyl-terminal hydrolase 10 [EC:3.4.19.12]				O	KOG1871	Ubiquitin-specific protease
Capana01g002750	TBCA_ARATH Tubulin-specific chaperone A OS=Arabidopsis thaliana GN=At2g30410 PE=1 SV=2	At2g30410	plasma membrane		GO:0005622 intracellular; GO:0005623 cell; GO:0005737 cytoplasm; GO:0005829 cytosol; GO:0044424 intracellular part; GO:0044444 cytoplasmic part; GO:0044464 cell part;		K17292	TBCA; tubulin-specific chaperone A		PF02970	Tubulin binding cofactor A	Z	KOG3470	Beta-tubulin folding cofactor A
Capana01g002806	LACS1_ARATH Long chain acyl-CoA synthetase 1 OS=Arabidopsis thaliana GN=LACS1 PE=2 SV=1	LACS1	cytoplasm	GO:0001676 long-chain fatty acid metabolic process; GO:0006082 organic acid metabolic process; GO:0006629 lipid metabolic process; GO:0006631 fatty acid metabolic process; GO:0008152 metabolic process; GO:0009058 biosynthetic process; GO:0009059 macromolecule biosynthetic process; GO:0009987 cellular process; GO:0010025 wax biosynthetic process; GO:0010143 cutin biosynthetic process; GO:0010166 w…	GO:0005622 intracellular; GO:0005623 cell; GO:0005737 cytoplasm; GO:0005783 endoplasmic reticulum; GO:0012505 endomembrane system; GO:0043226 organelle; GO:0043227 membrane-bounded organelle; GO:0043229 intracellular organelle; GO:0043231 intracellular membrane-bounded organelle; GO:0044424 intracellular part; GO:0044444 cytoplasmic part; GO:0044464 cell part;	GO:0003824 catalytic activity; GO:0004467 long-chain fatty acid-CoA ligase activity; GO:0015645 fatty acid ligase activity; GO:0016405 CoA-ligase activity; GO:0016874 ligase activity; GO:0016877 ligase activity, forming carbon-sulfur bonds; GO:0016878 acid-thiol ligase activity; GO:0031957 very long-chain fatty acid-CoA ligase activity;	K01897	ACSL, fadD; long-chain acyl-CoA synthetase [EC:6.2.1.3]	cann00061 Fatty acid biosynthesis; cann00071 Fatty acid degradation; cann01100 Metabolic pathways; cann01212 Fatty acid metabolism; cann04146 Peroxisome			I	KOG1256	Long-chain acyl-CoA synthetases (AMP-forming)
Capana01g002857	CEFD_STRCL Isopenicillin N epimerase OS=Streptomyces clavuligerus GN=cefD PE=1 SV=3	cefD	cytoskeleton	GO:0000096 sulfur amino acid metabolic process; GO:0000098 sulfur amino acid catabolic process; GO:0006082 organic acid metabolic process; GO:0006090 pyruvate metabolic process; GO:0006520 cellular amino acid metabolic process; GO:0006534 cysteine metabolic process; GO:0006790 sulfur compound metabolic process; GO:0006807 nitrogen compound metabolic process; GO:0008152 metabolic process; GO:00090…	GO:0005622 intracellular; GO:0005623 cell; GO:0005737 cytoplasm; GO:0005829 cytosol; GO:0044424 intracellular part; GO:0044444 cytoplasmic part; GO:0044464 cell part;	GO:0003824 catalytic activity; GO:0016829 lyase activity; GO:0016846 carbon-sulfur lyase activity; GO:0080146 L-cysteine desulfhydrase activity;	K22207	LCD; L-cysteine desulfhydrase [EC:4.4.1.28]	cann00270 Cysteine and methionine metabolism; cann01100 Metabolic pathways	PF00266	Aminotransferase class-V	E	KOG1549	Cysteine desulfurase NFS1
Capana01g002860	"SECA_SPIOL Protein translocase subunit SecA, chloroplastic OS=Spinacia oleracea GN=secA PE=2 SV=1"	secA	chloroplast	GO:0006810 transport; GO:0008104 protein localization; GO:0015031 protein transport; GO:0015833 peptide transport; GO:0033036 macromolecule localization; GO:0042886 amide transport; GO:0045184 establishment of protein localization; GO:0051179 localization; GO:0051234 establishment of localization; GO:0055085 transmembrane transport; GO:0071702 organic substance transport; GO:0071705 nitrogen comp…		GO:0000166 nucleotide binding; GO:0003824 catalytic activity; GO:0005215 transporter activity; GO:0005488 binding; GO:0005524 ATP binding; GO:0008144 drug binding; GO:0008320 protein transmembrane transporter activity; GO:0008565 protein transporter activity; GO:0015399 primary active transmembrane transporter activity; GO:0015405 P-P-bond-hydrolysis-driven transmembrane transporter activity; GO:…	K03070	secA; preprotein translocase subunit SecA	cann03060 Protein export
Capana01g002878	"CGEP_ORYSJ Probable glutamyl endopeptidase, chloroplastic OS=Oryza sativa subsp. japonica GN=GEP PE=2 SV=1"	GEP	cytoplasm		GO:0005622 intracellular; GO:0005623 cell; GO:0005737 cytoplasm; GO:0009507 chloroplast; GO:0009532 plastid stroma; GO:0009536 plastid; GO:0009570 chloroplast stroma; GO:0043226 organelle; GO:0043227 membrane-bounded organelle; GO:0043229 intracellular organelle; GO:0043231 intracellular membrane-bounded organelle; GO:0044422 organelle part; GO:0044424 intracellular part; GO:0044434 chloroplast p…					PF00326	Prolyl oligopeptidase family	O	KOG2100	Dipeptidyl aminopeptidase
Capana01g002883	PRX2B_ARATH Peroxiredoxin-2B OS=Arabidopsis thaliana GN=PRXIIB PE=1 SV=1	PRXIIB	cytoplasm	GO:0010035 response to inorganic substance; GO:0010038 response to metal ion; GO:0042221 response to chemical; GO:0046686 response to cadmium ion; GO:0050896 response to stimulus;	GO:0005622 intracellular; GO:0005623 cell; GO:0005737 cytoplasm; GO:0005829 cytosol; GO:0005886 plasma membrane; GO:0009507 chloroplast; GO:0009536 plastid; GO:0016020 membrane; GO:0043226 organelle; GO:0043227 membrane-bounded organelle; GO:0043229 intracellular organelle; GO:0043231 intracellular membrane-bounded organelle; GO:0044424 intracellular part; GO:0044444 cytoplasmic part; GO:0044464 …					PF08534	Redoxin	O	KOG0541	Alkyl hydroperoxide reductase/peroxiredoxin
Capana01g002908	PYRG_DICDI CTP synthase OS=Dictyostelium discoideum GN=ctps PE=3 SV=1	ctps	chloroplast	GO:0006139 nucleobase-containing compound metabolic process; GO:0006206 pyrimidine nucleobase metabolic process; GO:0006213 pyrimidine nucleoside metabolic process; GO:0006220 pyrimidine nucleotide metabolic process; GO:0006221 pyrimidine nucleotide biosynthetic process; GO:0006241 CTP biosynthetic process; GO:0006629 lipid metabolic process; GO:0006644 phospholipid metabolic process; GO:0006725 …		GO:0003824 catalytic activity; GO:0003883 CTP synthase activity; GO:0016874 ligase activity; GO:0016879 ligase activity, forming carbon-nitrogen bonds;	K01937	pyrG, CTPS; CTP synthase [EC:6.3.4.2]	cann00240 Pyrimidine metabolism; cann01100 Metabolic pathways	PF06418; PF00117	CTP synthase N-terminus; Glutamine amidotransferase class-I	F	KOG2387	CTP synthase (UTP-ammonia lyase)
Capana01g002916	TM205_XENLA Transmembrane protein 205 OS=Xenopus laevis GN=tmem205 PE=2 SV=1	tmem205	plasma membrane							PF13664	Domain of unknown function (DUF4149)	S	KOG2886	Uncharacterized conserved protein
Capana01g002934	"GLGL3_SOLTU Glucose-1-phosphate adenylyltransferase large subunit 3, chloroplastic/amyloplastic OS=Solanum tuberosum GN=AGPS3 PE=2 SV=1"	AGPS3	chloroplast		GO:0005622 intracellular; GO:0005623 cell; GO:0005737 cytoplasm; GO:0009501 amyloplast; GO:0009507 chloroplast; GO:0009526 plastid envelope; GO:0009532 plastid stroma; GO:0009536 plastid; GO:0009570 chloroplast stroma; GO:0009941 chloroplast envelope; GO:0031967 organelle envelope; GO:0031975 envelope; GO:0043226 organelle; GO:0043227 membrane-bounded organelle; GO:0043229 intracellular organelle…	GO:0003824 catalytic activity; GO:0008878 glucose-1-phosphate adenylyltransferase activity; GO:0016740 transferase activity; GO:0016772 transferase activity, transferring phosphorus-containing groups; GO:0016779 nucleotidyltransferase activity; GO:0070566 adenylyltransferase activity;	K00975	glgC; glucose-1-phosphate adenylyltransferase [EC:2.7.7.27]	cann00500 Starch and sucrose metabolism; cann00520 Amino sugar and nucleotide sugar metabolism; cann01100 Metabolic pathways; cann01110 Biosynthesis of secondary metabolites			H	KOG1322	GDP-mannose pyrophosphorylase/mannose-1-phosphate guanylyltransferase
Capana01g002939	"PRX2F_ARATH Peroxiredoxin-2F, mitochondrial OS=Arabidopsis thaliana GN=PRXIIF PE=1 SV=2"	PRXIIF	mitochondria	GO:0006950 response to stress; GO:0006979 response to oxidative stress; GO:0008152 metabolic process; GO:0009636 response to toxic substance; GO:0009987 cellular process; GO:0010035 response to inorganic substance; GO:0010038 response to metal ion; GO:0042221 response to chemical; GO:0046686 response to cadmium ion; GO:0050896 response to stimulus; GO:0051716 cellular response to stimulus; GO:005…	GO:0005622 intracellular; GO:0005623 cell; GO:0005737 cytoplasm; GO:0005739 mitochondrion; GO:0005759 mitochondrial matrix; GO:0031974 membrane-enclosed lumen; GO:0043226 organelle; GO:0043227 membrane-bounded organelle; GO:0043229 intracellular organelle; GO:0043231 intracellular membrane-bounded organelle; GO:0043233 organelle lumen; GO:0044422 organelle part; GO:0044424 intracellular part; GO:…	GO:0003824 catalytic activity; GO:0004601 peroxidase activity; GO:0016209 antioxidant activity; GO:0016491 oxidoreductase activity; GO:0016684 oxidoreductase activity, acting on peroxide as acceptor;				PF08534	Redoxin	O	KOG0541	Alkyl hydroperoxide reductase/peroxiredoxin
Capana01g002948	7SB1_SOYBN Basic 7S globulin OS=Glycine max GN=BG PE=1 SV=2	BG	chloroplast									O	KOG1339	Aspartyl protease
Capana01g002957	7SB1_SOYBN Basic 7S globulin OS=Glycine max GN=BG PE=1 SV=2	BG	chloroplast									O	KOG1339	Aspartyl protease
Capana01g003035	Tyrosine-protein phosphatase cdc-14	---	chloroplast
Capana01g003039	"CBSX3_ARATH CBS domain-containing protein CBSX3, mitochondrial OS=Arabidopsis thaliana GN=CBSX3 PE=1 SV=1"	CBSX3	mitochondria	GO:0006950 response to stress; GO:0006970 response to osmotic stress; GO:0009628 response to abiotic stimulus; GO:0009651 response to salt stress; GO:0009987 cellular process; GO:0019725 cellular homeostasis; GO:0042592 homeostatic process; GO:0045454 cell redox homeostasis; GO:0050789 regulation of biological process; GO:0050794 regulation of cellular process; GO:0050896 response to stimulus; GO…	GO:0005622 intracellular; GO:0005623 cell; GO:0005737 cytoplasm; GO:0005739 mitochondrion; GO:0043226 organelle; GO:0043227 membrane-bounded organelle; GO:0043229 intracellular organelle; GO:0043231 intracellular membrane-bounded organelle; GO:0044424 intracellular part; GO:0044444 cytoplasmic part; GO:0044464 cell part;	GO:0005488 binding; GO:0043167 ion binding; GO:0043169 cation binding; GO:0046872 metal ion binding; GO:0046914 transition metal ion binding; GO:0050897 cobalt ion binding;				PF00571	CBS domain
Capana01g003044	GLYR1_AEDAE Putative oxidoreductase GLYR1 homolog OS=Aedes aegypti GN=AAEL006684 PE=3 SV=1	AAEL006684	chloroplast	GO:0006950 response to stress; GO:0006979 response to oxidative stress; GO:0008152 metabolic process; GO:0050896 response to stimulus; GO:0055114 oxidation-reduction process;	GO:0005622 intracellular; GO:0005623 cell; GO:0005737 cytoplasm; GO:0005829 cytosol; GO:0044424 intracellular part; GO:0044444 cytoplasmic part; GO:0044464 cell part;	GO:0003824 catalytic activity; GO:0003858 3-hydroxybutyrate dehydrogenase activity; GO:0005488 binding; GO:0005515 protein binding; GO:0016491 oxidoreductase activity; GO:0016614 oxidoreductase activity, acting on CH-OH group of donors; GO:0016616 oxidoreductase activity, acting on the CH-OH group of donors, NAD or NADP as acceptor; GO:0035064 methylated histone binding; GO:0042393 histone bindin…	K18121	GLYR; glyoxylate/succinic semialdehyde reductase [EC:1.1.1.79 1.1.1.-]	cann00630 Glyoxylate and dicarboxylate metabolism; cann00650 Butanoate metabolism; cann01100 Metabolic pathways; cann01200 Carbon metabolism			I	KOG0409	Predicted dehydrogenase
Capana01g003049	"GLNA2_DAUCA Glutamine synthetase, chloroplastic OS=Daucus carota GN=GLN2 PE=2 SV=1"	GLN2	chloroplast	GO:0006082 organic acid metabolic process; GO:0006520 cellular amino acid metabolic process; GO:0006536 glutamate metabolic process; GO:0006541 glutamine metabolic process; GO:0006807 nitrogen compound metabolic process; GO:0006950 response to stress; GO:0006970 response to osmotic stress; GO:0007568 aging; GO:0008152 metabolic process; GO:0009064 glutamine family amino acid metabolic process; GO…	GO:0005576 extracellular region; GO:0005622 intracellular; GO:0005623 cell; GO:0005737 cytoplasm; GO:0005739 mitochondrion; GO:0005829 cytosol; GO:0005840 ribosome; GO:0009507 chloroplast; GO:0009526 plastid envelope; GO:0009532 plastid stroma; GO:0009534 chloroplast thylakoid; GO:0009535 chloroplast thylakoid membrane; GO:0009536 plastid; GO:0009570 chloroplast stroma; GO:0009579 thylakoid; GO:0…	GO:0003824 catalytic activity; GO:0004356 glutamate-ammonia ligase activity; GO:0016211 ammonia ligase activity; GO:0016874 ligase activity; GO:0016879 ligase activity, forming carbon-nitrogen bonds; GO:0016880 acid-ammonia (or amide) ligase activity;	K01915	glnA, GLUL; glutamine synthetase [EC:6.3.1.2]	cann00220 Arginine biosynthesis; cann00250 Alanine, aspartate and glutamate metabolism; cann00630 Glyoxylate and dicarboxylate metabolism; cann00910 Nitrogen metabolism; cann01100 Metabolic pathways; cann01230 Biosynthesis of amino acids	PF03951; PF00120	Glutamine synthetase, beta-Grasp domain; Glutamine synthetase, catalytic domain	E	KOG0683	Glutamine synthetase
Capana01g003067	"PPDK_MESCR Pyruvate, phosphate dikinase, chloroplastic OS=Mesembryanthemum crystallinum GN=PPD PE=2 SV=1"	PPD	chloroplast		GO:0005622 intracellular; GO:0005623 cell; GO:0005634 nucleus; GO:0005737 cytoplasm; GO:0005829 cytosol; GO:0009507 chloroplast; GO:0009532 plastid stroma; GO:0009536 plastid; GO:0009570 chloroplast stroma; GO:0043226 organelle; GO:0043227 membrane-bounded organelle; GO:0043229 intracellular organelle; GO:0043231 intracellular membrane-bounded organelle; GO:0044422 organelle part; GO:0044424 intr…		K01006	ppdK; pyruvate, orthophosphate dikinase [EC:2.7.9.1]	cann00620 Pyruvate metabolism; cann00710 Carbon fixation in photosynthetic organisms; cann01100 Metabolic pathways; cann01200 Carbon metabolism	PF02896	PEP-utilising enzyme, TIM barrel domain
Capana01g003096	SYI_NOSP7 Isoleucine--tRNA ligase OS=Nostoc punctiforme (strain ATCC 29133 / PCC 73102) GN=ileS PE=3 SV=1	ileS	nucleus	GO:0000003 reproduction; GO:0003006 developmental process involved in reproduction; GO:0007275 multicellular organism development; GO:0009791 post-embryonic development; GO:0009908 flower development; GO:0022414 reproductive process; GO:0032501 multicellular organismal process; GO:0032502 developmental process; GO:0035670 plant-type ovary development; GO:0048367 shoot system development; GO:00484…	GO:0005622 intracellular; GO:0005623 cell; GO:0005737 cytoplasm; GO:0009507 chloroplast; GO:0009532 plastid stroma; GO:0009536 plastid; GO:0009570 chloroplast stroma; GO:0043226 organelle; GO:0043227 membrane-bounded organelle; GO:0043229 intracellular organelle; GO:0043231 intracellular membrane-bounded organelle; GO:0044422 organelle part; GO:0044424 intracellular part; GO:0044434 chloroplast p…		K01870	IARS, ileS; isoleucyl-tRNA synthetase [EC:6.1.1.5]	cann00970 Aminoacyl-tRNA biosynthesis	PF08264	Anticodon-binding domain of tRNA	J	KOG0433	Isoleucyl-tRNA synthetase
Capana01g003103	Putative NAD(P)-binding Rossmann-fold superfamily protein-like	---	chloroplast
Capana01g003112	"ACP1_CASGL Acyl carrier protein 1, chloroplastic OS=Casuarina glauca GN=ACP1 PE=2 SV=1"	ACP1	chloroplast		GO:0005622 intracellular; GO:0005623 cell; GO:0005737 cytoplasm; GO:0009507 chloroplast; GO:0009536 plastid; GO:0043226 organelle; GO:0043227 membrane-bounded organelle; GO:0043229 intracellular organelle; GO:0043231 intracellular membrane-bounded organelle; GO:0044424 intracellular part; GO:0044444 cytoplasmic part; GO:0044464 cell part;					PF00550	Phosphopantetheine attachment site	I	KOG1748	Acyl carrier protein/NADH-ubiquinone oxidoreductase, NDUFAB1/SDAP subunit
Capana01g003113	SODC_CAPAN Superoxide dismutase [Cu-Zn] OS=Capsicum annuum GN=SODCC PE=2 SV=1	SODCC	cytoplasm	GO:0000302 response to reactive oxygen species; GO:0000303 response to superoxide; GO:0000305 response to oxygen radical; GO:0001101 response to acid chemical; GO:0006801 superoxide metabolic process; GO:0006950 response to stress; GO:0006952 defense response; GO:0006970 response to osmotic stress; GO:0006979 response to oxidative stress; GO:0008152 metabolic process; GO:0009314 response to radia…	GO:0005576 extracellular region; GO:0005615 extracellular space; GO:0005622 intracellular; GO:0005623 cell; GO:0005634 nucleus; GO:0005737 cytoplasm; GO:0005829 cytosol; GO:0043226 organelle; GO:0043227 membrane-bounded organelle; GO:0043229 intracellular organelle; GO:0043231 intracellular membrane-bounded organelle; GO:0044421 extracellular region part; GO:0044424 intracellular part; GO:0044444…	GO:0003824 catalytic activity; GO:0004784 superoxide dismutase activity; GO:0005488 binding; GO:0005507 copper ion binding; GO:0008270 zinc ion binding; GO:0016209 antioxidant activity; GO:0016491 oxidoreductase activity; GO:0016721 oxidoreductase activity, acting on superoxide radicals as acceptor; GO:0043167 ion binding; GO:0043169 cation binding; GO:0046872 metal ion binding; GO:0046914 transi…	K04565	SOD1; superoxide dismutase, Cu-Zn family [EC:1.15.1.1]	cann04146 Peroxisome	PF00080	Copper/zinc superoxide dismutase (SODC)	P	KOG0441	Cu2+/Zn2+ superoxide dismutase SOD1
Capana01g003169	"divinyl chlorophyllide a 8-vinyl-reductase, chloroplastic"	---	chloroplast	GO:0006725 cellular aromatic compound metabolic process; GO:0006778 porphyrin-containing compound metabolic process; GO:0006779 porphyrin-containing compound biosynthetic process; GO:0006807 nitrogen compound metabolic process; GO:0008152 metabolic process; GO:0009058 biosynthetic process; GO:0009987 cellular process; GO:0015994 chlorophyll metabolic process; GO:0015995 chlorophyll biosynthetic p…	GO:0005622 intracellular; GO:0005623 cell; GO:0005737 cytoplasm; GO:0009507 chloroplast; GO:0009526 plastid envelope; GO:0009534 chloroplast thylakoid; GO:0009536 plastid; GO:0009579 thylakoid; GO:0009941 chloroplast envelope; GO:0016020 membrane; GO:0031967 organelle envelope; GO:0031975 envelope; GO:0031976 plastid thylakoid; GO:0031984 organelle subcompartment; GO:0043226 organelle; GO:0043227…	GO:0003824 catalytic activity; GO:0016491 oxidoreductase activity; GO:0051744 3,8-divinyl protochlorophyllide a 8-vinyl reductase activity;	K19073	DVR; divinyl chlorophyllide a 8-vinyl-reductase [EC:1.3.1.75]	cann00860 Porphyrin and chlorophyll metabolism; cann01100 Metabolic pathways; cann01110 Biosynthesis of secondary metabolites	PF13460	NADH(P)-binding	G	KOG1203	Predicted dehydrogenase
Capana01g003217	"RK2_SOLTU 50S ribosomal protein L2, chloroplastic OS=Solanum tuberosum GN=rpl2-A PE=3 SV=1"	rpl2-A	cytoplasm	GO:0002181 cytoplasmic translation; GO:0006412 translation; GO:0006518 peptide metabolic process; GO:0006807 nitrogen compound metabolic process; GO:0008152 metabolic process; GO:0009058 biosynthetic process; GO:0009059 macromolecule biosynthetic process; GO:0009987 cellular process; GO:0010467 gene expression; GO:0019538 protein metabolic process; GO:0034641 cellular nitrogen compound metabolic …	GO:0005622 intracellular; GO:0005623 cell; GO:0005737 cytoplasm; GO:0005829 cytosol; GO:0005840 ribosome; GO:0009507 chloroplast; GO:0009526 plastid envelope; GO:0009532 plastid stroma; GO:0009536 plastid; GO:0009570 chloroplast stroma; GO:0009941 chloroplast envelope; GO:0015934 large ribosomal subunit; GO:0016020 membrane; GO:0022625 cytosolic large ribosomal subunit; GO:0022626 cytosolic ribos…	GO:0003676 nucleic acid binding; GO:0003723 RNA binding; GO:0003729 mRNA binding; GO:0003735 structural constituent of ribosome; GO:0005198 structural molecule activity; GO:0005488 binding; GO:0097159 organic cyclic compound binding; GO:1901363 heterocyclic compound binding;	K02886	RP-L2, MRPL2, rplB; large subunit ribosomal protein L2	cann03010 Ribosome	PF00181	Ribosomal Proteins L2, RNA binding domain	J	KOG0438	Mitochondrial/chloroplast ribosomal protein L2
Capana01g003224	"CISY_DAUCA Citrate synthase, mitochondrial OS=Daucus carota GN=CS PE=2 SV=1"	CS	cytoplasm	GO:0006082 organic acid metabolic process; GO:0006091 generation of precursor metabolites and energy; GO:0006099 tricarboxylic acid cycle; GO:0006101 citrate metabolic process; GO:0008152 metabolic process; GO:0009060 aerobic respiration; GO:0009987 cellular process; GO:0010035 response to inorganic substance; GO:0010038 response to metal ion; GO:0015980 energy derivation by oxidation of organic …	GO:0005618 cell wall; GO:0005622 intracellular; GO:0005623 cell; GO:0005737 cytoplasm; GO:0005739 mitochondrion; GO:0005759 mitochondrial matrix; GO:0009507 chloroplast; GO:0009536 plastid; GO:0030312 external encapsulating structure; GO:0031974 membrane-enclosed lumen; GO:0043226 organelle; GO:0043227 membrane-bounded organelle; GO:0043229 intracellular organelle; GO:0043231 intracellular membra…	GO:0000166 nucleotide binding; GO:0003824 catalytic activity; GO:0004108 citrate (Si)-synthase activity; GO:0005488 binding; GO:0005524 ATP binding; GO:0008144 drug binding; GO:0008270 zinc ion binding; GO:0016740 transferase activity; GO:0016746 transferase activity, transferring acyl groups; GO:0017076 purine nucleotide binding; GO:0030554 adenyl nucleotide binding; GO:0032553 ribonucleotide bi…	K01647	CS, gltA; citrate synthase [EC:2.3.3.1]	cann00020 Citrate cycle (TCA cycle); cann00630 Glyoxylate and dicarboxylate metabolism; cann01100 Metabolic pathways; cann01110 Biosynthesis of secondary metabolites; cann01200 Carbon metabolism; cann01210 2-Oxocarboxylic acid metabolism; cann01230 Biosynthesis of amino acids	PF00285	Citrate synthase	C	KOG2617	Citrate synthase
Capana01g003225	"PGMC_SOLTU Phosphoglucomutase, cytoplasmic OS=Solanum tuberosum GN=PGM1 PE=2 SV=1"	PGM1	chloroplast	GO:0000271 polysaccharide biosynthetic process; GO:0005975 carbohydrate metabolic process; GO:0005976 polysaccharide metabolic process; GO:0005977 glycogen metabolic process; GO:0005978 glycogen biosynthetic process; GO:0005982 starch metabolic process; GO:0005996 monosaccharide metabolic process; GO:0006006 glucose metabolic process; GO:0006012 galactose metabolic process; GO:0006073 cellular gl…	GO:0005622 intracellular; GO:0005623 cell; GO:0005634 nucleus; GO:0005737 cytoplasm; GO:0005829 cytosol; GO:0005886 plasma membrane; GO:0009507 chloroplast; GO:0009526 plastid envelope; GO:0009532 plastid stroma; GO:0009536 plastid; GO:0009570 chloroplast stroma; GO:0010319 stromule; GO:0016020 membrane; GO:0031967 organelle envelope; GO:0031975 envelope; GO:0043226 organelle; GO:0043227 membrane…	GO:0003824 catalytic activity; GO:0004614 phosphoglucomutase activity; GO:0016853 isomerase activity; GO:0016866 intramolecular transferase activity; GO:0016868 intramolecular transferase activity, phosphotransferases;	K01835	pgm; phosphoglucomutase [EC:5.4.2.2]	cann00010 Glycolysis / Gluconeogenesis; cann00030 Pentose phosphate pathway; cann00052 Galactose metabolism; cann00230 Purine metabolism; cann00500 Starch and sucrose metabolism; cann00520 Amino sugar and nucleotide sugar metabolism; cann01100 Metabolic pathways; cann01110 Biosynthesis of secondary metabolites	PF02878; PF02879; PF02880	Phosphoglucomutase/phosphomannomutase, alpha/beta/alpha domain I; Phosphoglucomutase/phosphomannomutase, alpha/beta/alpha domain II; Phosphoglucomutase/phosphomannomutase, alpha/beta/alpha domain III	G	KOG0625	Phosphoglucomutase
Capana01g003259	RS16_FRIAG 40S ribosomal protein S16 OS=Fritillaria agrestis GN=RPS16 PE=2 SV=1	RPS16	cytoplasm	GO:0000462 maturation of SSU-rRNA from tricistronic rRNA transcript (SSU-rRNA, 5.8S rRNA, LSU-rRNA); GO:0006139 nucleobase-containing compound metabolic process; GO:0006364 rRNA processing; GO:0006396 RNA processing; GO:0006412 translation; GO:0006518 peptide metabolic process; GO:0006725 cellular aromatic compound metabolic process; GO:0006807 nitrogen compound metabolic process; GO:0008152 meta…	GO:0005618 cell wall; GO:0005622 intracellular; GO:0005623 cell; GO:0005634 nucleus; GO:0005730 nucleolus; GO:0005737 cytoplasm; GO:0005829 cytosol; GO:0005840 ribosome; GO:0005844 polysome; GO:0005911 cell-cell junction; GO:0009506 plasmodesma; GO:0009507 chloroplast; GO:0009536 plastid; GO:0015935 small ribosomal subunit; GO:0016020 membrane; GO:0022626 cytosolic ribosome; GO:0022627 cytosolic …	GO:0003676 nucleic acid binding; GO:0003723 RNA binding; GO:0003729 mRNA binding; GO:0003735 structural constituent of ribosome; GO:0005198 structural molecule activity; GO:0005488 binding; GO:0097159 organic cyclic compound binding; GO:1901363 heterocyclic compound binding;	K02960	RP-S16e, RPS16; small subunit ribosomal protein S16e	cann03010 Ribosome			J	KOG1753	40S ribosomal protein S16
Capana01g003292	GST23_MAIZE Glutathione transferase GST 23 OS=Zea mays PE=2 SV=1	---	cytoplasm				K00799	GST, gst; glutathione S-transferase [EC:2.5.1.18]	cann00480 Glutathione metabolism; cann01100 Metabolic pathways	PF02798; PF00043	Glutathione S-transferase, N-terminal domain; Glutathione S-transferase, C-terminal domain	O	KOG0406	Glutathione S-transferase
Capana01g003296	GST23_MAIZE Glutathione transferase GST 23 OS=Zea mays PE=2 SV=1	---	cytoplasm	GO:0001101 response to acid chemical; GO:0006518 peptide metabolic process; GO:0006575 cellular modified amino acid metabolic process; GO:0006749 glutathione metabolic process; GO:0006790 sulfur compound metabolic process; GO:0006807 nitrogen compound metabolic process; GO:0006950 response to stress; GO:0008152 metabolic process; GO:0009056 catabolic process; GO:0009266 response to temperature st…	GO:0005622 intracellular; GO:0005623 cell; GO:0005737 cytoplasm; GO:0044424 intracellular part; GO:0044464 cell part;	GO:0003824 catalytic activity; GO:0004364 glutathione transferase activity; GO:0016740 transferase activity; GO:0016765 transferase activity, transferring alkyl or aryl (other than methyl) groups;	K00799	GST, gst; glutathione S-transferase [EC:2.5.1.18]	cann00480 Glutathione metabolism; cann01100 Metabolic pathways	PF02798; PF00043	Glutathione S-transferase, N-terminal domain; Glutathione S-transferase, C-terminal domain	O	KOG0406	Glutathione S-transferase
Capana01g003323	arp2/3 complex-activating protein rickA	---	cytoplasm	GO:0006950 response to stress; GO:0006952 defense response; GO:0009605 response to external stimulus; GO:0009607 response to biotic stimulus; GO:0009617 response to bacterium; GO:0009987 cellular process; GO:0010118 stomatal movement; GO:0042742 defense response to bacterium; GO:0043207 response to external biotic stimulus; GO:0050896 response to stimulus; GO:0051704 multi-organism process; GO:00…	GO:0005622 intracellular; GO:0005623 cell; GO:0005634 nucleus; GO:0005737 cytoplasm; GO:0043226 organelle; GO:0043227 membrane-bounded organelle; GO:0043229 intracellular organelle; GO:0043231 intracellular membrane-bounded organelle; GO:0044424 intracellular part; GO:0044464 cell part;	GO:0005488 binding; GO:0030246 carbohydrate binding;
Capana01g003349	EIF3B_TOBAC Eukaryotic translation initiation factor 3 subunit B OS=Nicotiana tabacum GN=TIF3B1 PE=2 SV=1	TIF3B1	cytoplasm				K03253	EIF3B; translation initiation factor 3 subunit B	cann03013 RNA transport	PF00076	RNA recognition motif. (a.k.a. RRM, RBD, or RNP domain)	J	KOG2314	Translation initiation factor 3, subunit b (eIF-3b)
Capana01g003385	DRP1E_ARATH Dynamin-related protein 1E OS=Arabidopsis thaliana GN=DRP1E PE=1 SV=1	DRP1E	cytoplasm	GO:0000266 mitochondrial fission; GO:0006810 transport; GO:0006950 response to stress; GO:0006952 defense response; GO:0006996 organelle organization; GO:0007005 mitochondrion organization; GO:0009605 response to external stimulus; GO:0009607 response to biotic stimulus; GO:0009620 response to fungus; GO:0009987 cellular process; GO:0010035 response to inorganic substance; GO:0010038 response to …	GO:0005622 intracellular; GO:0005623 cell; GO:0005737 cytoplasm; GO:0005739 mitochondrion; GO:0005773 vacuole; GO:0005774 vacuolar membrane; GO:0005856 cytoskeleton; GO:0005886 plasma membrane; GO:0005911 cell-cell junction; GO:0009506 plasmodesma; GO:0009524 phragmoplast; GO:0016020 membrane; GO:0030054 cell junction; GO:0031090 organelle membrane; GO:0043226 organelle; GO:0043227 membrane-bound…	GO:0003824 catalytic activity; GO:0003924 GTPase activity; GO:0005488 binding; GO:0005515 protein binding; GO:0008017 microtubule binding; GO:0008092 cytoskeletal protein binding; GO:0015631 tubulin binding; GO:0016462 pyrophosphatase activity; GO:0016787 hydrolase activity; GO:0016817 hydrolase activity, acting on acid anhydrides; GO:0016818 hydrolase activity, acting on acid anhydrides, in phos…				PF00350	Dynamin family	U	KOG0446	Vacuolar sorting protein VPS1, dynamin, and related proteins
Capana01g003391	RAH1B_ARATH Ras-related protein RABH1b OS=Arabidopsis thaliana GN=RABH1B PE=1 SV=1	RABH1B	chloroplast	GO:0006810 transport; GO:0006890 retrograde vesicle-mediated transport, Golgi to ER; GO:0006891 intra-Golgi vesicle-mediated transport; GO:0016192 vesicle-mediated transport; GO:0016197 endosomal transport; GO:0016482 cytosolic transport; GO:0042147 retrograde transport, endosome to Golgi; GO:0046907 intracellular transport; GO:0048193 Golgi vesicle transport; GO:0051179 localization; GO:0051234 …	GO:0000139 Golgi membrane; GO:0005622 intracellular; GO:0005623 cell; GO:0005737 cytoplasm; GO:0005768 endosome; GO:0005773 vacuole; GO:0005774 vacuolar membrane; GO:0005794 Golgi apparatus; GO:0005802 trans-Golgi network; GO:0005829 cytosol; GO:0005886 plasma membrane; GO:0005911 cell-cell junction; GO:0009506 plasmodesma; GO:0012505 endomembrane system; GO:0016020 membrane; GO:0030054 cell junc…	GO:0000166 nucleotide binding; GO:0001882 nucleoside binding; GO:0001883 purine nucleoside binding; GO:0005488 binding; GO:0005525 GTP binding; GO:0017076 purine nucleotide binding; GO:0019001 guanyl nucleotide binding; GO:0032549 ribonucleoside binding; GO:0032550 purine ribonucleoside binding; GO:0032553 ribonucleotide binding; GO:0032555 purine ribonucleotide binding; GO:0032561 guanyl ribonuc…	K07893	RAB6A; Ras-related protein Rab-6A		PF00071	Ras family	U	KOG0094	GTPase Rab6/YPT6/Ryh1, small G protein superfamily
Capana01g003394	"protein TRIGALACTOSYLDIACYLGLYCEROL 4, chloroplastic"	---	cytoplasm
Capana01g003395	"CH10C_ARATH 20 kDa chaperonin, chloroplastic OS=Arabidopsis thaliana GN=CPN21 PE=1 SV=2"	CPN21	chloroplast	GO:0006457 protein folding; GO:0006458 'de novo' protein folding; GO:0006950 response to stress; GO:0006986 response to unfolded protein; GO:0009987 cellular process; GO:0010033 response to organic substance; GO:0035966 response to topologically incorrect protein; GO:0042221 response to chemical; GO:0050896 response to stimulus; GO:0051084 'de novo' posttranslational protein folding; GO:0051085 c…	GO:0005622 intracellular; GO:0005623 cell; GO:0005737 cytoplasm; GO:0005739 mitochondrion; GO:0005759 mitochondrial matrix; GO:0009507 chloroplast; GO:0009526 plastid envelope; GO:0009532 plastid stroma; GO:0009536 plastid; GO:0009570 chloroplast stroma; GO:0009941 chloroplast envelope; GO:0031967 organelle envelope; GO:0031974 membrane-enclosed lumen; GO:0031975 envelope; GO:0043226 organelle; G…	GO:0005488 binding; GO:0005515 protein binding; GO:0019904 protein domain specific binding; GO:0043167 ion binding; GO:0043169 cation binding; GO:0046872 metal ion binding; GO:0051082 unfolded protein binding; GO:0051087 chaperone binding;	K04078	groES, HSPE1; chaperonin GroES		PF00166	Chaperonin 10 Kd subunit	O	KOG1641	Mitochondrial chaperonin
Capana01g003407	IF4G1_ARATH Eukaryotic translation initiation factor 4G OS=Arabidopsis thaliana GN=EIF4G PE=1 SV=2	EIF4G	cytoplasm	GO:0001101 response to acid chemical; GO:0009605 response to external stimulus; GO:0009607 response to biotic stimulus; GO:0009615 response to virus; GO:0009719 response to endogenous stimulus; GO:0009725 response to hormone; GO:0009737 response to abscisic acid; GO:0010033 response to organic substance; GO:0033993 response to lipid; GO:0042221 response to chemical; GO:0043207 response to externa…	GO:0005622 intracellular; GO:0005623 cell; GO:0005634 nucleus; GO:0005737 cytoplasm; GO:0005829 cytosol; GO:0043226 organelle; GO:0043227 membrane-bounded organelle; GO:0043229 intracellular organelle; GO:0043231 intracellular membrane-bounded organelle; GO:0044424 intracellular part; GO:0044444 cytoplasmic part; GO:0044464 cell part;	GO:0003676 nucleic acid binding; GO:0003723 RNA binding; GO:0003729 mRNA binding; GO:0005488 binding; GO:0097159 organic cyclic compound binding; GO:1901363 heterocyclic compound binding;	K03260	EIF4G; translation initiation factor 4G	cann03013 RNA transport			J	KOG0401	Translation initiation factor 4F, ribosome/mRNA-bridging subunit (eIF-4G)
Capana01g003417	GANAB_DICDI Neutral alpha-glucosidase AB OS=Dictyostelium discoideum GN=modA PE=3 SV=1	modA	plasma membrane	GO:0000271 polysaccharide biosynthetic process; GO:0000902 cell morphogenesis; GO:0005975 carbohydrate metabolic process; GO:0005976 polysaccharide metabolic process; GO:0006073 cellular glucan metabolic process; GO:0006464 cellular protein modification process; GO:0006491 N-glycan processing; GO:0006807 nitrogen compound metabolic process; GO:0006950 response to stress; GO:0006952 defense respon…	GO:0005622 intracellular; GO:0005623 cell; GO:0005737 cytoplasm; GO:0005783 endoplasmic reticulum; GO:0009507 chloroplast; GO:0009536 plastid; GO:0012505 endomembrane system; GO:0043226 organelle; GO:0043227 membrane-bounded organelle; GO:0043229 intracellular organelle; GO:0043231 intracellular membrane-bounded organelle; GO:0044424 intracellular part; GO:0044444 cytoplasmic part; GO:0044464 cel…	GO:0003824 catalytic activity; GO:0004553 hydrolase activity, hydrolyzing O-glycosyl compounds; GO:0015926 glucosidase activity; GO:0016787 hydrolase activity; GO:0016798 hydrolase activity, acting on glycosyl bonds; GO:0033919 glucan 1,3-alpha-glucosidase activity; GO:0090599 alpha-glucosidase activity; GO:0090600 alpha-1,3-glucosidase activity;	K05546	GANAB; alpha 1,3-glucosidase [EC:3.2.1.84]	cann00510 N-Glycan biosynthesis; cann01100 Metabolic pathways; cann04141 Protein processing in endoplasmic reticulum	PF13802	Galactose mutarotase-like	G	KOG1066	Glucosidase II catalytic (alpha) subunit and related enzymes, glycosyl hydrolase family 31
Capana01g003521	"SYGM2_ARATH Glycine--tRNA ligase 2, chloroplastic/mitochondrial OS=Arabidopsis thaliana GN=GLYRS-2 PE=1 SV=1"	GLYRS-2	chloroplast	GO:0000003 reproduction; GO:0003006 developmental process involved in reproduction; GO:0006082 organic acid metabolic process; GO:0006139 nucleobase-containing compound metabolic process; GO:0006399 tRNA metabolic process; GO:0006412 translation; GO:0006418 tRNA aminoacylation for protein translation; GO:0006426 glycyl-tRNA aminoacylation; GO:0006518 peptide metabolic process; GO:0006520 cellular…	GO:0005622 intracellular; GO:0005623 cell; GO:0005737 cytoplasm; GO:0005739 mitochondrion; GO:0009507 chloroplast; GO:0009532 plastid stroma; GO:0009536 plastid; GO:0009570 chloroplast stroma; GO:0043226 organelle; GO:0043227 membrane-bounded organelle; GO:0043229 intracellular organelle; GO:0043231 intracellular membrane-bounded organelle; GO:0044422 organelle part; GO:0044424 intracellular part…	GO:0003824 catalytic activity; GO:0004812 aminoacyl-tRNA ligase activity; GO:0004820 glycine-tRNA ligase activity; GO:0005488 binding; GO:0005515 protein binding; GO:0016874 ligase activity; GO:0016875 ligase activity, forming carbon-oxygen bonds; GO:0046983 protein dimerization activity;	K14164	glyQS; glycyl-tRNA synthetase [EC:6.1.1.14]	cann00970 Aminoacyl-tRNA biosynthesis	PF02091	Glycyl-tRNA synthetase alpha subunit
Capana01g003524	RAD2A_ARATH Ras-related protein RABD2a OS=Arabidopsis thaliana GN=RABD2A PE=1 SV=3	RABD2A	extracellular				K07874	RAB1A; Ras-related protein Rab-1A		PF00071	Ras family	U	KOG0084	GTPase Rab1/YPT1, small G protein superfamily, and related GTP-binding proteins
Capana01g003544	TCPA_ARATH T-complex protein 1 subunit alpha OS=Arabidopsis thaliana GN=CCT1 PE=2 SV=1	CCT1	cytoplasm	GO:0006457 protein folding; GO:0006458 'de novo' protein folding; GO:0009987 cellular process; GO:0061077 chaperone-mediated protein folding;	GO:0005622 intracellular; GO:0005623 cell; GO:0005737 cytoplasm; GO:0005829 cytosol; GO:0005832 chaperonin-containing T-complex; GO:0032991 macromolecular complex; GO:0044424 intracellular part; GO:0044444 cytoplasmic part; GO:0044445 cytosolic part; GO:0044464 cell part; GO:0101031 chaperone complex;	GO:0005488 binding; GO:0005515 protein binding; GO:0044183 protein binding involved in protein folding; GO:0051082 unfolded protein binding;	K09493	CCT1, TCP1; T-complex protein 1 subunit alpha				O	KOG0360	Chaperonin complex component, TCP-1 alpha subunit (CCT1)
Capana01g003555	S6PD_MALDO NADP-dependent D-sorbitol-6-phosphate dehydrogenase OS=Malus domestica GN=S6PDH PE=2 SV=1	S6PDH	cytoplasm				K00011	AKR1B; aldehyde reductase [EC:1.1.1.21]	cann00040 Pentose and glucuronate interconversions; cann00051 Fructose and mannose metabolism; cann00052 Galactose metabolism; cann00561 Glycerolipid metabolism; cann00790 Folate biosynthesis; cann01100 Metabolic pathways	PF00248	Aldo/keto reductase family	S	KOG1577	Aldo/keto reductase family proteins
Capana01g003564	VAP12_ARATH Vesicle-associated protein 1-2 OS=Arabidopsis thaliana GN=PVA12 PE=1 SV=1	PVA12	nucleus	GO:0006605 protein targeting; GO:0006810 transport; GO:0006886 intracellular protein transport; GO:0008104 protein localization; GO:0015031 protein transport; GO:0015833 peptide transport; GO:0033036 macromolecule localization; GO:0034613 cellular protein localization; GO:0042886 amide transport; GO:0045184 establishment of protein localization; GO:0046907 intracellular transport; GO:0051179 loca…	GO:0000322 storage vacuole; GO:0000325 plant-type vacuole; GO:0000326 protein storage vacuole; GO:0005622 intracellular; GO:0005623 cell; GO:0005634 nucleus; GO:0005737 cytoplasm; GO:0005773 vacuole; GO:0005783 endoplasmic reticulum; GO:0005789 endoplasmic reticulum membrane; GO:0005829 cytosol; GO:0005886 plasma membrane; GO:0012505 endomembrane system; GO:0016020 membrane; GO:0016021 integral c…					PF00635	MSP (Major sperm protein) domain	U	KOG0439	VAMP-associated protein involved in inositol metabolism
Capana01g003589	AMP2B_ARATH Methionine aminopeptidase 2B OS=Arabidopsis thaliana GN=MAP2B PE=2 SV=2	MAP2B	cytoplasm				K01265	map; methionyl aminopeptidase [EC:3.4.11.18]		PF00557	Metallopeptidase family M24	J	KOG2775	Metallopeptidase
Capana01g003613	NPC2_ASPOR Phosphatidylglycerol/phosphatidylinositol transfer protein OS=Aspergillus oryzae (strain ATCC 42149 / RIB 40) GN=pltp PE=1 SV=1	pltp	extracellular							PF02221	ML domain	S	KOG4680	Uncharacterized conserved protein, contains ML domain
Capana01g003621	"FABD_MOUSE Malonyl-CoA-acyl carrier protein transacylase, mitochondrial OS=Mus musculus GN=Mcat PE=2 SV=3"	Mcat	chloroplast				K00645	fabD; [acyl-carrier-protein] S-malonyltransferase [EC:2.3.1.39]	cann00061 Fatty acid biosynthesis; cann01100 Metabolic pathways; cann01212 Fatty acid metabolism	PF00698	Acyl transferase domain	I	KOG2926	Malonyl-CoA:ACP transacylase
Capana01g003643	COPB2_ARATH Coatomer subunit beta-2 OS=Arabidopsis thaliana GN=At4g31490 PE=2 SV=2	At4g31490	plasma membrane				K17301	COPB1, SEC26; coatomer subunit beta		PF07718	Coatamer beta C-terminal region	U	KOG1058	Vesicle coat complex COPI, beta subunit
Capana01g003662	"BAS1B_ARATH 2-Cys peroxiredoxin BAS1-like, chloroplastic OS=Arabidopsis thaliana GN=At5g06290 PE=2 SV=3"	At5g06290	chloroplast				K03386	PRDX2_4, ahpC; peroxiredoxin (alkyl hydroperoxide reductase subunit C) [EC:1.11.1.15]		PF00578; PF10417	AhpC/TSA family; C-terminal domain of 1-Cys peroxiredoxin	O	KOG0852	Alkyl hydroperoxide reductase, thiol specific antioxidant and related enzymes
Capana01g003678	UEV1D_ARATH Ubiquitin-conjugating enzyme E2 variant 1D OS=Arabidopsis thaliana GN=UEV1D PE=1 SV=1	UEV1D	cytoplasm	GO:0000209 protein polyubiquitination; GO:0006139 nucleobase-containing compound metabolic process; GO:0006259 DNA metabolic process; GO:0006281 DNA repair; GO:0006301 postreplication repair; GO:0006464 cellular protein modification process; GO:0006725 cellular aromatic compound metabolic process; GO:0006807 nitrogen compound metabolic process; GO:0006950 response to stress; GO:0006974 cellular r…	GO:0005622 intracellular; GO:0005623 cell; GO:0005634 nucleus; GO:0005737 cytoplasm; GO:0005829 cytosol; GO:0043226 organelle; GO:0043227 membrane-bounded organelle; GO:0043229 intracellular organelle; GO:0043231 intracellular membrane-bounded organelle; GO:0044424 intracellular part; GO:0044444 cytoplasmic part; GO:0044464 cell part;	GO:0003824 catalytic activity; GO:0004842 ubiquitin-protein transferase activity; GO:0005488 binding; GO:0005515 protein binding; GO:0016740 transferase activity; GO:0019787 ubiquitin-like protein transferase activity; GO:0019899 enzyme binding; GO:0031625 ubiquitin protein ligase binding; GO:0044389 ubiquitin-like protein ligase binding; GO:0061630 ubiquitin protein ligase activity; GO:0061659 u…	K10704	UBE2V; ubiquitin-conjugating enzyme E2 variant		PF00179	Ubiquitin-conjugating enzyme	O	KOG0896	Ubiquitin-conjugating enzyme E2
Capana01g003695	Putative ovule protein	---	chloroplast							PF13460	NADH(P)-binding	G	KOG1203	Predicted dehydrogenase
Capana01g003725	"RISB_ARATH 6,7-dimethyl-8-ribityllumazine synthase, chloroplastic OS=Arabidopsis thaliana GN=At2g44050 PE=2 SV=1"	At2g44050	cytoplasm		GO:0005622 intracellular; GO:0005623 cell; GO:0005737 cytoplasm; GO:0009507 chloroplast; GO:0009532 plastid stroma; GO:0009536 plastid; GO:0009570 chloroplast stroma; GO:0043226 organelle; GO:0043227 membrane-bounded organelle; GO:0043229 intracellular organelle; GO:0043231 intracellular membrane-bounded organelle; GO:0044422 organelle part; GO:0044424 intracellular part; GO:0044434 chloroplast p…		K00794	ribH, RIB4; 6,7-dimethyl-8-ribityllumazine synthase [EC:2.5.1.78]	cann00740 Riboflavin metabolism; cann01100 Metabolic pathways; cann01110 Biosynthesis of secondary metabolites	PF00885	6,7-dimethyl-8-ribityllumazine synthase	H	KOG3243	6,7-dimethyl-8-ribityllumazine synthase
Capana01g003736	Putative ovule protein	---	chloroplast
Capana01g003755	BGAL_VIBC3 Beta-galactosidase OS=Vibrio cholerae serotype O1 (strain ATCC 39541 / Ogawa 395 / O395) GN=lacZ PE=3 SV=2	lacZ	chloroplast				K01190	lacZ; beta-galactosidase [EC:3.2.1.23]	cann00052 Galactose metabolism; cann00511 Other glycan degradation; cann00600 Sphingolipid metabolism; cann01100 Metabolic pathways	PF02836; PF02929	Glycosyl hydrolases family 2, TIM barrel domain; Beta galactosidase small chain	G	KOG2024	Beta-Glucuronidase GUSB (glycosylhydrolase superfamily 2)
Capana01g003759	RL91_ARATH 60S ribosomal protein L9-1 OS=Arabidopsis thaliana GN=RPL9B PE=2 SV=3	RPL9B	cytoplasm	GO:0002181 cytoplasmic translation; GO:0003002 regionalization; GO:0006412 translation; GO:0006518 peptide metabolic process; GO:0006807 nitrogen compound metabolic process; GO:0007275 multicellular organism development; GO:0007389 pattern specification process; GO:0008152 metabolic process; GO:0009058 biosynthetic process; GO:0009059 macromolecule biosynthetic process; GO:0009955 adaxial/abaxial…	GO:0005622 intracellular; GO:0005623 cell; GO:0005634 nucleus; GO:0005730 nucleolus; GO:0005737 cytoplasm; GO:0005773 vacuole; GO:0005774 vacuolar membrane; GO:0005829 cytosol; GO:0005840 ribosome; GO:0005844 polysome; GO:0005886 plasma membrane; GO:0005911 cell-cell junction; GO:0009506 plasmodesma; GO:0009507 chloroplast; GO:0009526 plastid envelope; GO:0009536 plastid; GO:0009941 chloroplast e…	GO:0003676 nucleic acid binding; GO:0003723 RNA binding; GO:0003735 structural constituent of ribosome; GO:0005198 structural molecule activity; GO:0005488 binding; GO:0097159 organic cyclic compound binding; GO:1901363 heterocyclic compound binding;	K02940	RP-L9e, RPL9; large subunit ribosomal protein L9e	cann03010 Ribosome	PF00347	Ribosomal protein L6	J	KOG3255	60S ribosomal protein L9
Capana01g003771	YCF1_SOLBU Putative membrane protein ycf1 OS=Solanum bulbocastanum GN=ycf1 PE=3 SV=1	ycf1	cytoplasm	GO:0006810 transport; GO:0008104 protein localization; GO:0015031 protein transport; GO:0015833 peptide transport; GO:0033036 macromolecule localization; GO:0042886 amide transport; GO:0045184 establishment of protein localization; GO:0051179 localization; GO:0051234 establishment of localization; GO:0071702 organic substance transport; GO:0071705 nitrogen compound transport;	GO:0005622 intracellular; GO:0005623 cell; GO:0005737 cytoplasm; GO:0009507 chloroplast; GO:0009526 plastid envelope; GO:0009528 plastid inner membrane; GO:0009536 plastid; GO:0009706 chloroplast inner membrane; GO:0009941 chloroplast envelope; GO:0016020 membrane; GO:0019866 organelle inner membrane; GO:0031090 organelle membrane; GO:0031967 organelle envelope; GO:0031969 chloroplast membrane; G…	GO:0005215 transporter activity; GO:0008565 protein transporter activity;
Capana01g003799	EIF2A_CHICK Eukaryotic translation initiation factor 2A OS=Gallus gallus GN=EIF2A PE=2 SV=1	EIF2A	nucleus				K15026	EIF2A; translation initiation factor 2A				J	KOG2315	Predicted translation initiation factor related to eIF-3a
Capana01g003816	Putative ribosomal RNA small subunit methyltransferase G-like	---	cytoplasm,nucleus
Capana01g003876	"MAOM_SOLTU NAD-dependent malic enzyme 62 kDa isoform, mitochondrial OS=Solanum tuberosum PE=1 SV=1"	---	mitochondria	GO:0006082 organic acid metabolic process; GO:0006090 pyruvate metabolic process; GO:0006108 malate metabolic process; GO:0006950 response to stress; GO:0006970 response to osmotic stress; GO:0008152 metabolic process; GO:0009628 response to abiotic stimulus; GO:0009651 response to salt stress; GO:0009987 cellular process; GO:0019752 carboxylic acid metabolic process; GO:0032787 monocarboxylic ac…	GO:0005622 intracellular; GO:0005623 cell; GO:0005737 cytoplasm; GO:0005739 mitochondrion; GO:0005759 mitochondrial matrix; GO:0009507 chloroplast; GO:0009536 plastid; GO:0031974 membrane-enclosed lumen; GO:0043226 organelle; GO:0043227 membrane-bounded organelle; GO:0043229 intracellular organelle; GO:0043231 intracellular membrane-bounded organelle; GO:0043233 organelle lumen; GO:0044422 organe…	GO:0000166 nucleotide binding; GO:0003824 catalytic activity; GO:0004470 malic enzyme activity; GO:0004471 malate dehydrogenase (decarboxylating) (NAD+) activity; GO:0005488 binding; GO:0005515 protein binding; GO:0005524 ATP binding; GO:0008144 drug binding; GO:0008270 zinc ion binding; GO:0016491 oxidoreductase activity; GO:0016614 oxidoreductase activity, acting on CH-OH group of donors; GO:00…	K00028	E1.1.1.39; malate dehydrogenase (decarboxylating) [EC:1.1.1.39]	cann00620 Pyruvate metabolism; cann00710 Carbon fixation in photosynthetic organisms; cann01100 Metabolic pathways; cann01200 Carbon metabolism	PF00390; PF03949	Malic enzyme, N-terminal domain; Malic enzyme, NAD binding domain	C	KOG1257	NADP+-dependent malic enzyme
Capana01g003927	TM9S4_PONAB Transmembrane 9 superfamily member 4 OS=Pongo abelii GN=TM9SF4 PE=2 SV=1	TM9SF4	plasma membrane				K17086	TM9SF2_4; transmembrane 9 superfamily member 2/4				U	KOG1278	Endosomal membrane proteins, EMP70
Capana01g003957	Y464_SYNE7 UPF0133 protein Synpcc7942_0464 OS=Synechococcus elongatus (strain PCC 7942) GN=Synpcc7942_0464 PE=3 SV=2	Synpcc7942_0464	chloroplast									L	KOG0017	FOG: Transposon-encoded proteins with TYA, reverse transcriptase, integrase domains in various combinations
Capana01g003958	ENL1_ARATH Early nodulin-like protein 1 OS=Arabidopsis thaliana GN=At2g25060 PE=1 SV=2	At2g25060	chloroplast		GO:0005623 cell; GO:0005886 plasma membrane; GO:0005911 cell-cell junction; GO:0009506 plasmodesma; GO:0016020 membrane; GO:0030054 cell junction; GO:0031224 intrinsic component of membrane; GO:0031225 anchored component of membrane; GO:0031226 intrinsic component of plasma membrane; GO:0044425 membrane part; GO:0044459 plasma membrane part; GO:0044464 cell part; GO:0046658 anchored component of …
Capana01g003981	"GPX7_ARATH Putative glutathione peroxidase 7, chloroplastic OS=Arabidopsis thaliana GN=GPX7 PE=2 SV=2"	GPX7	chloroplast	GO:0009628 response to abiotic stimulus; GO:0050896 response to stimulus; GO:0080167 response to karrikin;	GO:0005622 intracellular; GO:0005623 cell; GO:0005737 cytoplasm; GO:0009507 chloroplast; GO:0009526 plastid envelope; GO:0009532 plastid stroma; GO:0009534 chloroplast thylakoid; GO:0009535 chloroplast thylakoid membrane; GO:0009536 plastid; GO:0009570 chloroplast stroma; GO:0009579 thylakoid; GO:0009941 chloroplast envelope; GO:0016020 membrane; GO:0031967 organelle envelope; GO:0031975 envelope…		K00432	gpx; glutathione peroxidase [EC:1.11.1.9]	cann00480 Glutathione metabolism; cann00590 Arachidonic acid metabolism; cann01100 Metabolic pathways			O	KOG1651	Glutathione peroxidase
Capana01g004009	"MGDG_TOBAC Probable monogalactosyldiacylglycerol synthase, chloroplastic OS=Nicotiana tabacum GN=MGD A PE=2 SV=1"	MGD	cytoplasm	GO:0000003 reproduction; GO:0003006 developmental process involved in reproduction; GO:0006629 lipid metabolic process; GO:0006643 membrane lipid metabolic process; GO:0006664 glycolipid metabolic process; GO:0006996 organelle organization; GO:0007275 multicellular organism development; GO:0008152 metabolic process; GO:0008610 lipid biosynthetic process; GO:0009058 biosynthetic process; GO:000924…	GO:0005622 intracellular; GO:0005623 cell; GO:0005737 cytoplasm; GO:0009507 chloroplast; GO:0009526 plastid envelope; GO:0009528 plastid inner membrane; GO:0009536 plastid; GO:0009706 chloroplast inner membrane; GO:0009941 chloroplast envelope; GO:0016020 membrane; GO:0019866 organelle inner membrane; GO:0031090 organelle membrane; GO:0031967 organelle envelope; GO:0031969 chloroplast membrane; G…	GO:0003824 catalytic activity; GO:0008194 UDP-glycosyltransferase activity; GO:0008378 galactosyltransferase activity; GO:0016740 transferase activity; GO:0016757 transferase activity, transferring glycosyl groups; GO:0016758 transferase activity, transferring hexosyl groups; GO:0035250 UDP-galactosyltransferase activity; GO:0046509 1,2-diacylglycerol 3-beta-galactosyltransferase activity;	K03715	MGD; 1,2-diacylglycerol 3-beta-galactosyltransferase [EC:2.4.1.46]	cann00561 Glycerolipid metabolism; cann01100 Metabolic pathways	PF04101	Glycosyltransferase family 28 C-terminal domain
Capana01g004028	"FKB13_ARATH Peptidyl-prolyl cis-trans isomerase FKBP13, chloroplastic OS=Arabidopsis thaliana GN=FKBP13 PE=1 SV=2"	FKBP13	chloroplast	GO:0000413 protein peptidyl-prolyl isomerization; GO:0006457 protein folding; GO:0006464 cellular protein modification process; GO:0006807 nitrogen compound metabolic process; GO:0008152 metabolic process; GO:0009987 cellular process; GO:0018193 peptidyl-amino acid modification; GO:0018208 peptidyl-proline modification; GO:0019538 protein metabolic process; GO:0036211 protein modification process…	GO:0005622 intracellular; GO:0005623 cell; GO:0005737 cytoplasm; GO:0009507 chloroplast; GO:0009536 plastid; GO:0009579 thylakoid; GO:0031977 thylakoid lumen; GO:0043226 organelle; GO:0043227 membrane-bounded organelle; GO:0043229 intracellular organelle; GO:0043231 intracellular membrane-bounded organelle; GO:0044424 intracellular part; GO:0044436 thylakoid part; GO:0044444 cytoplasmic part; GO:…	GO:0003755 peptidyl-prolyl cis-trans isomerase activity; GO:0003824 catalytic activity; GO:0005488 binding; GO:0005527 macrolide binding; GO:0005528 FK506 binding; GO:0008144 drug binding; GO:0016853 isomerase activity; GO:0016859 cis-trans isomerase activity; GO:0097159 organic cyclic compound binding; GO:1901363 heterocyclic compound binding;				PF00254	FKBP-type peptidyl-prolyl cis-trans isomerase	O	KOG0549	FKBP-type peptidyl-prolyl cis-trans isomerase
Capana01g004056	SOX_ARATH Probable sarcosine oxidase OS=Arabidopsis thaliana GN=At2g24580 PE=2 SV=1	At2g24580	cytoplasm	GO:0008152 metabolic process; GO:0055114 oxidation-reduction process;		GO:0003824 catalytic activity; GO:0008115 sarcosine oxidase activity; GO:0016491 oxidoreductase activity; GO:0016645 oxidoreductase activity, acting on the CH-NH group of donors; GO:0016647 oxidoreductase activity, acting on the CH-NH group of donors, oxygen as acceptor;	K00306	PIPOX; sarcosine oxidase / L-pipecolate oxidase [EC:1.5.3.1 1.5.3.7]	cann00260 Glycine, serine and threonine metabolism; cann00310 Lysine degradation; cann01100 Metabolic pathways; cann04146 Peroxisome	PF01266	FAD dependent oxidoreductase	E	KOG2820	FAD-dependent oxidoreductase
Capana01g004093	GDL8_ARATH GDSL esterase/lipase At1g28590 OS=Arabidopsis thaliana GN=At1g28590 PE=2 SV=2	At1g28590	chloroplast
Capana01g004115	AIG2L_ARATH AIG2-like protein OS=Arabidopsis thaliana GN=At5g39720 PE=1 SV=1	At5g39720	extracellular
Capana01g004129	"ATPAM_NICPL ATP synthase subunit alpha, mitochondrial OS=Nicotiana plumbaginifolia GN=ATPA PE=3 SV=1"	ATPA	chloroplast		GO:0005622 intracellular; GO:0005623 cell; GO:0005737 cytoplasm; GO:0005739 mitochondrion; GO:0005740 mitochondrial envelope; GO:0005743 mitochondrial inner membrane; GO:0016020 membrane; GO:0019866 organelle inner membrane; GO:0031090 organelle membrane; GO:0031966 mitochondrial membrane; GO:0031967 organelle envelope; GO:0031975 envelope; GO:0043226 organelle; GO:0043227 membrane-bounded organe…		K02111	ATPF1A, atpA; F-type H+-transporting ATPase subunit alpha [EC:3.6.3.14]	cann00190 Oxidative phosphorylation; cann00195 Photosynthesis; cann01100 Metabolic pathways	PF02874; PF00006; PF00306	ATP synthase alpha/beta family, beta-barrel domain; ATP synthase alpha/beta family, nucleotide-binding domain; ATP synthase alpha/beta chain, C terminal domain	C	KOG1353	F0F1-type ATP synthase, alpha subunit
Capana01g004201	NOTUM_MOUSE Protein notum homolog OS=Mus musculus GN=Notum PE=2 SV=2	Notum	extracellular				K19882	NOTUM; O-palmitoleoyl-L-serine hydrolase [EC:3.1.1.98]				M	KOG4287	Pectin acetylesterase and similar proteins
Capana01g004234	UAF30_YEAST Upstream activation factor subunit UAF30 OS=Saccharomyces cerevisiae (strain ATCC 204508 / S288c) GN=UAF30 PE=1 SV=1	UAF30	chloroplast							PF02201	SWIB/MDM2 domain	K	KOG1946	RNA polymerase I transcription factor UAF
Capana01g004236	U420_DICDI UPF0420 protein OS=Dictyostelium discoideum GN=DDB_G0277179 PE=3 SV=1	DDB_G0277179	chloroplast	GO:0009314 response to radiation; GO:0009411 response to UV; GO:0009416 response to light stimulus; GO:0009628 response to abiotic stimulus; GO:0010224 response to UV-B; GO:0032502 developmental process; GO:0050896 response to stimulus;	GO:0005622 intracellular; GO:0005623 cell; GO:0005737 cytoplasm; GO:0005739 mitochondrion; GO:0009507 chloroplast; GO:0009526 plastid envelope; GO:0009536 plastid; GO:0009941 chloroplast envelope; GO:0031967 organelle envelope; GO:0031975 envelope; GO:0043226 organelle; GO:0043227 membrane-bounded organelle; GO:0043229 intracellular organelle; GO:0043231 intracellular membrane-bounded organelle; …							S	KOG4249	Uncharacterized conserved protein
Capana01g004264	KIRO_ACTDE Kirola OS=Actinidia deliciosa PE=1 SV=1	---	cytoplasm		GO:0005622 intracellular; GO:0005623 cell; GO:0005737 cytoplasm; GO:0009507 chloroplast; GO:0009536 plastid; GO:0043226 organelle; GO:0043227 membrane-bounded organelle; GO:0043229 intracellular organelle; GO:0043231 intracellular membrane-bounded organelle; GO:0044424 intracellular part; GO:0044444 cytoplasmic part; GO:0044464 cell part;					PF00407	Pathogenesis-related protein Bet v I family
Capana01g004281	PMTK_ARATH Probable methyltransferase PMT20 OS=Arabidopsis thaliana GN=At1g31850 PE=1 SV=1	At1g31850	cytoplasm	GO:0008152 metabolic process; GO:0032259 methylation;	GO:0005622 intracellular; GO:0005623 cell; GO:0005737 cytoplasm; GO:0005768 endosome; GO:0005794 Golgi apparatus; GO:0005802 trans-Golgi network; GO:0012505 endomembrane system; GO:0031410 cytoplasmic vesicle; GO:0031982 vesicle; GO:0031984 organelle subcompartment; GO:0043226 organelle; GO:0043227 membrane-bounded organelle; GO:0043229 intracellular organelle; GO:0043231 intracellular membrane-b…	GO:0003824 catalytic activity; GO:0008168 methyltransferase activity; GO:0008757 S-adenosylmethionine-dependent methyltransferase activity; GO:0016740 transferase activity; GO:0016741 transferase activity, transferring one-carbon groups;
Capana01g004297	CMT2_ARATH DNA (cytosine-5)-methyltransferase CMT2 OS=Arabidopsis thaliana GN=CMT2 PE=2 SV=3	CMT2	nucleus	GO:0006139 nucleobase-containing compound metabolic process; GO:0006259 DNA metabolic process; GO:0006304 DNA modification; GO:0006305 DNA alkylation; GO:0006306 DNA methylation; GO:0006725 cellular aromatic compound metabolic process; GO:0006807 nitrogen compound metabolic process; GO:0006950 response to stress; GO:0008152 metabolic process; GO:0009266 response to temperature stimulus; GO:000940…		GO:0003824 catalytic activity; GO:0003886 DNA (cytosine-5-)-methyltransferase activity; GO:0008168 methyltransferase activity; GO:0008757 S-adenosylmethionine-dependent methyltransferase activity; GO:0009008 DNA-methyltransferase activity; GO:0016740 transferase activity; GO:0016741 transferase activity, transferring one-carbon groups;	K00558	DNMT1, dcm; DNA (cytosine-5)-methyltransferase 1 [EC:2.1.1.37]	cann00270 Cysteine and methionine metabolism; cann01100 Metabolic pathways	PF01426; PF00385; PF00145	BAH domain; Chromo (CHRromatin Organisation MOdifier) domain; C-5 cytosine-specific DNA methylase
Capana01g004366	"AB7I_ARATH Protein ABCI7, chloroplastic OS=Arabidopsis thaliana GN=ABCI7 PE=1 SV=1"	ABCI7	chloroplast	GO:0000003 reproduction; GO:0003006 developmental process involved in reproduction; GO:0006790 sulfur compound metabolic process; GO:0006996 organelle organization; GO:0007275 multicellular organism development; GO:0008152 metabolic process; GO:0009657 plastid organization; GO:0009668 plastid membrane organization; GO:0009790 embryo development; GO:0009791 post-embryonic development; GO:0009793 e…	GO:0005622 intracellular; GO:0005623 cell; GO:0005737 cytoplasm; GO:0009507 chloroplast; GO:0009532 plastid stroma; GO:0009536 plastid; GO:0009570 chloroplast stroma; GO:0043226 organelle; GO:0043227 membrane-bounded organelle; GO:0043229 intracellular organelle; GO:0043231 intracellular membrane-bounded organelle; GO:0044422 organelle part; GO:0044424 intracellular part; GO:0044434 chloroplast p…	GO:0005215 transporter activity;	K09015	sufD; Fe-S cluster assembly protein SufD
Capana01g004373	HCT_ARATH Hydroxycinnamoyl-Coenzyme A shikimate/quinate hydroxycinnamoyltransferase OS=Arabidopsis thaliana GN=HCT PE=2 SV=1	HCT	cytoplasm
Capana01g004493	"PSAN_ARATH Photosystem I reaction center subunit N, chloroplastic OS=Arabidopsis thaliana GN=PSAN PE=1 SV=2"	PSAN	chloroplast			GO:0005488 binding; GO:0005515 protein binding; GO:0019904 protein domain specific binding;	K02701	psaN; photosystem I subunit PsaN	cann00195 Photosynthesis
Capana02g000008	RPT2_ARATH Root phototropism protein 2 OS=Arabidopsis thaliana GN=RPT2 PE=1 SV=2	RPT2	plasma membrane	GO:0009314 response to radiation; GO:0009416 response to light stimulus; GO:0009605 response to external stimulus; GO:0009606 tropism; GO:0009628 response to abiotic stimulus; GO:0009637 response to blue light; GO:0009638 phototropism; GO:0050896 response to stimulus;	GO:0005622 intracellular; GO:0005623 cell; GO:0005634 nucleus; GO:0005737 cytoplasm; GO:0043226 organelle; GO:0043227 membrane-bounded organelle; GO:0043229 intracellular organelle; GO:0043231 intracellular membrane-bounded organelle; GO:0044424 intracellular part; GO:0044464 cell part;					PF00651	BTB/POZ domain
Capana02g000014	ACCO_ACTDE 1-aminocyclopropane-1-carboxylate oxidase OS=Actinidia deliciosa GN=ACO PE=2 SV=1	ACO	cytoplasm	GO:0008152 metabolic process; GO:0009058 biosynthetic process; GO:0009692 ethylene metabolic process; GO:0009693 ethylene biosynthetic process; GO:0009987 cellular process; GO:0010817 regulation of hormone levels; GO:0042445 hormone metabolic process; GO:0042446 hormone biosynthetic process; GO:0043449 cellular alkene metabolic process; GO:0043450 alkene biosynthetic process; GO:0044237 cellular …			K05933	E1.14.17.4; aminocyclopropanecarboxylate oxidase [EC:1.14.17.4]	cann00270 Cysteine and methionine metabolism; cann01100 Metabolic pathways; cann01110 Biosynthesis of secondary metabolites	PF03171	2OG-Fe(II) oxygenase superfamily	Q	KOG0143	Iron/ascorbate family oxidoreductases
Capana02g000024	"CGEP_ARATH Probable glutamyl endopeptidase, chloroplastic OS=Arabidopsis thaliana GN=GEP PE=2 SV=2"	GEP	chloroplast		GO:0005622 intracellular; GO:0005623 cell; GO:0005737 cytoplasm; GO:0009507 chloroplast; GO:0009532 plastid stroma; GO:0009536 plastid; GO:0009570 chloroplast stroma; GO:0043226 organelle; GO:0043227 membrane-bounded organelle; GO:0043229 intracellular organelle; GO:0043231 intracellular membrane-bounded organelle; GO:0044422 organelle part; GO:0044424 intracellular part; GO:0044434 chloroplast p…							O	KOG2100	Dipeptidyl aminopeptidase
Capana02g000031	AMPP1_SORMK Probable Xaa-Pro aminopeptidase P OS=Sordaria macrospora (strain ATCC MYA-333 / DSM 997 / K(L3346) / K-hell) GN=AMPP PE=3 SV=1	AMPP	chloroplast	GO:0006508 proteolysis; GO:0006807 nitrogen compound metabolic process; GO:0006810 transport; GO:0008152 metabolic process; GO:0009914 hormone transport; GO:0009926 auxin polar transport; GO:0010817 regulation of hormone levels; GO:0019538 protein metabolic process; GO:0043170 macromolecule metabolic process; GO:0044238 primary metabolic process; GO:0051179 localization; GO:0051234 establishment …	GO:0005622 intracellular; GO:0005623 cell; GO:0005737 cytoplasm; GO:0005829 cytosol; GO:0005886 plasma membrane; GO:0016020 membrane; GO:0044424 intracellular part; GO:0044444 cytoplasmic part; GO:0044464 cell part; GO:0071944 cell periphery;	GO:0003824 catalytic activity; GO:0004177 aminopeptidase activity; GO:0005488 binding; GO:0008144 drug binding; GO:0008233 peptidase activity; GO:0008238 exopeptidase activity; GO:0008270 zinc ion binding; GO:0010013 N-1-naphthylphthalamic acid binding; GO:0016787 hydrolase activity; GO:0030145 manganese ion binding; GO:0031406 carboxylic acid binding; GO:0033218 amide binding; GO:0033293 monocar…	K01262	pepP; Xaa-Pro aminopeptidase [EC:3.4.11.9]		PF01321; PF00557	Creatinase/Prolidase N-terminal domain; Metallopeptidase family M24	E	KOG2413	Xaa-Pro aminopeptidase
Capana02g000053	ASPR_CUCPE Aspartic proteinase OS=Cucurbita pepo PE=2 SV=1	---	cytoplasm	GO:0006508 proteolysis; GO:0006807 nitrogen compound metabolic process; GO:0006950 response to stress; GO:0006970 response to osmotic stress; GO:0008152 metabolic process; GO:0009056 catabolic process; GO:0009057 macromolecule catabolic process; GO:0009628 response to abiotic stimulus; GO:0009651 response to salt stress; GO:0009719 response to endogenous stimulus; GO:0009725 response to hormone; …	GO:0005622 intracellular; GO:0005623 cell; GO:0005737 cytoplasm; GO:0005773 vacuole; GO:0005829 cytosol; GO:0005911 cell-cell junction; GO:0009506 plasmodesma; GO:0030054 cell junction; GO:0043226 organelle; GO:0043227 membrane-bounded organelle; GO:0043229 intracellular organelle; GO:0043231 intracellular membrane-bounded organelle; GO:0044424 intracellular part; GO:0044444 cytoplasmic part; GO:…	GO:0003824 catalytic activity; GO:0004175 endopeptidase activity; GO:0004190 aspartic-type endopeptidase activity; GO:0008233 peptidase activity; GO:0016787 hydrolase activity; GO:0070001 aspartic-type peptidase activity; GO:0070011 peptidase activity, acting on L-amino acid peptides;	K08245	E3.4.23.40; phytepsin [EC:3.4.23.40]		PF05184	Saposin-like type B, region 1	O	KOG1339	Aspartyl protease
Capana02g000063	RS13_SOYBN 40S ribosomal protein S13 OS=Glycine max GN=RPS13 PE=2 SV=1	RPS13	mitochondria	GO:0006412 translation; GO:0006518 peptide metabolic process; GO:0006807 nitrogen compound metabolic process; GO:0008152 metabolic process; GO:0009058 biosynthetic process; GO:0009059 macromolecule biosynthetic process; GO:0009987 cellular process; GO:0010467 gene expression; GO:0019538 protein metabolic process; GO:0034641 cellular nitrogen compound metabolic process; GO:0034645 cellular macromo…	GO:0005622 intracellular; GO:0005623 cell; GO:0005634 nucleus; GO:0005730 nucleolus; GO:0005737 cytoplasm; GO:0005829 cytosol; GO:0005840 ribosome; GO:0015935 small ribosomal subunit; GO:0022626 cytosolic ribosome; GO:0022627 cytosolic small ribosomal subunit; GO:0031974 membrane-enclosed lumen; GO:0031981 nuclear lumen; GO:0032991 macromolecular complex; GO:0043226 organelle; GO:0043227 membrane…	GO:0003676 nucleic acid binding; GO:0003723 RNA binding; GO:0003735 structural constituent of ribosome; GO:0005198 structural molecule activity; GO:0005488 binding; GO:0019843 rRNA binding; GO:0070181 small ribosomal subunit rRNA binding; GO:0097159 organic cyclic compound binding; GO:1901363 heterocyclic compound binding;	K02953	RP-S13e, RPS13; small subunit ribosomal protein S13e	cann03010 Ribosome	PF08069	Ribosomal S13/S15 N-terminal domain	J	KOG0400	40S ribosomal protein S13
Capana02g000066	"TKTC_SOLTU Transketolase, chloroplastic OS=Solanum tuberosum PE=2 SV=1"	---	cytoplasm		GO:0005622 intracellular; GO:0005623 cell; GO:0005737 cytoplasm; GO:0009507 chloroplast; GO:0009534 chloroplast thylakoid; GO:0009535 chloroplast thylakoid membrane; GO:0009536 plastid; GO:0009579 thylakoid; GO:0016020 membrane; GO:0031976 plastid thylakoid; GO:0031984 organelle subcompartment; GO:0034357 photosynthetic membrane; GO:0042651 thylakoid membrane; GO:0043226 organelle; GO:0043227 mem…	GO:0003824 catalytic activity; GO:0004802 transketolase activity; GO:0016740 transferase activity; GO:0016744 transferase activity, transferring aldehyde or ketonic groups;	K00615	E2.2.1.1, tktA, tktB; transketolase [EC:2.2.1.1]	cann00030 Pentose phosphate pathway; cann00710 Carbon fixation in photosynthetic organisms; cann01100 Metabolic pathways; cann01110 Biosynthesis of secondary metabolites; cann01200 Carbon metabolism; cann01230 Biosynthesis of amino acids	PF02779; PF02780	Transketolase, pyrimidine binding domain; Transketolase, C-terminal domain	G	KOG0523	Transketolase
Capana02g000067	"TKTC_SOLTU Transketolase, chloroplastic OS=Solanum tuberosum PE=2 SV=1"	---	chloroplast		GO:0005622 intracellular; GO:0005623 cell; GO:0005737 cytoplasm; GO:0009507 chloroplast; GO:0009534 chloroplast thylakoid; GO:0009535 chloroplast thylakoid membrane; GO:0009536 plastid; GO:0009579 thylakoid; GO:0016020 membrane; GO:0031976 plastid thylakoid; GO:0031984 organelle subcompartment; GO:0034357 photosynthetic membrane; GO:0042651 thylakoid membrane; GO:0043226 organelle; GO:0043227 mem…	GO:0003824 catalytic activity; GO:0004802 transketolase activity; GO:0016740 transferase activity; GO:0016744 transferase activity, transferring aldehyde or ketonic groups;	K00615	E2.2.1.1, tktA, tktB; transketolase [EC:2.2.1.1]	cann00030 Pentose phosphate pathway; cann00710 Carbon fixation in photosynthetic organisms; cann01100 Metabolic pathways; cann01110 Biosynthesis of secondary metabolites; cann01200 Carbon metabolism; cann01230 Biosynthesis of amino acids	PF00456	Transketolase, thiamine diphosphate binding domain	G	KOG0523	Transketolase
Capana02g000122	"P2SAF_ARATH Photosystem II stability/assembly factor HCF136, chloroplastic OS=Arabidopsis thaliana GN=HCF136 PE=1 SV=1"	HCF136	chloroplast	GO:0006996 organelle organization; GO:0009657 plastid organization; GO:0009719 response to endogenous stimulus; GO:0009725 response to hormone; GO:0009735 response to cytokinin; GO:0009987 cellular process; GO:0010033 response to organic substance; GO:0010035 response to inorganic substance; GO:0010038 response to metal ion; GO:0016043 cellular component organization; GO:0042221 response to chemi…	GO:0005622 intracellular; GO:0005623 cell; GO:0005737 cytoplasm; GO:0009507 chloroplast; GO:0009526 plastid envelope; GO:0009532 plastid stroma; GO:0009533 chloroplast stromal thylakoid; GO:0009534 chloroplast thylakoid; GO:0009535 chloroplast thylakoid membrane; GO:0009536 plastid; GO:0009570 chloroplast stroma; GO:0009579 thylakoid; GO:0009941 chloroplast envelope; GO:0016020 membrane; GO:00319…							U	KOG3511	Sortilin and related receptors
Capana02g000197	"KPYC_SOYBN Pyruvate kinase, cytosolic isozyme OS=Glycine max PE=2 SV=1"	---	cytoplasm	GO:0005975 carbohydrate metabolic process; GO:0006082 organic acid metabolic process; GO:0006090 pyruvate metabolic process; GO:0006091 generation of precursor metabolites and energy; GO:0006096 glycolytic process; GO:0006139 nucleobase-containing compound metabolic process; GO:0006163 purine nucleotide metabolic process; GO:0006164 purine nucleotide biosynthetic process; GO:0006165 nucleoside di…	GO:0005622 intracellular; GO:0005623 cell; GO:0005737 cytoplasm; GO:0044424 intracellular part; GO:0044464 cell part;	GO:0003824 catalytic activity; GO:0004743 pyruvate kinase activity; GO:0016740 transferase activity; GO:0016772 transferase activity, transferring phosphorus-containing groups; GO:0016773 phosphotransferase activity, alcohol group as acceptor;	K00873	PK, pyk; pyruvate kinase [EC:2.7.1.40]	cann00010 Glycolysis / Gluconeogenesis; cann00230 Purine metabolism; cann00620 Pyruvate metabolism; cann01100 Metabolic pathways; cann01110 Biosynthesis of secondary metabolites; cann01200 Carbon metabolism; cann01230 Biosynthesis of amino acids	PF02887	Pyruvate kinase, alpha/beta domain	G	KOG2323	Pyruvate kinase
Capana02g000204	VILI4_ARATH Villin-4 OS=Arabidopsis thaliana GN=VLN4 PE=1 SV=1	VLN4	nucleus	GO:0001101 response to acid chemical; GO:0006810 transport; GO:0006996 organelle organization; GO:0007010 cytoskeleton organization; GO:0007015 actin filament organization; GO:0007275 multicellular organism development; GO:0008064 regulation of actin polymerization or depolymerization; GO:0008154 actin polymerization or depolymerization; GO:0009653 anatomical structure morphogenesis; GO:0009719 r…	GO:0005622 intracellular; GO:0005623 cell; GO:0005737 cytoplasm; GO:0005829 cytosol; GO:0005856 cytoskeleton; GO:0015629 actin cytoskeleton; GO:0032432 actin filament bundle; GO:0043226 organelle; GO:0043228 non-membrane-bounded organelle; GO:0043229 intracellular organelle; GO:0043232 intracellular non-membrane-bounded organelle; GO:0044422 organelle part; GO:0044424 intracellular part; GO:00444…	GO:0003779 actin binding; GO:0005488 binding; GO:0005515 protein binding; GO:0008092 cytoskeletal protein binding; GO:0044877 macromolecular complex binding; GO:0051015 actin filament binding;				PF02209	Villin headpiece domain	Z	KOG0443	Actin regulatory proteins (gelsolin/villin family)
Capana02g000272	"APR3_ARATH 5'-adenylylsulfate reductase 3, chloroplastic OS=Arabidopsis thaliana GN=APR3 PE=2 SV=2"	43924	chloroplast	GO:0000103 sulfate assimilation; GO:0006790 sulfur compound metabolic process; GO:0008152 metabolic process; GO:0009987 cellular process; GO:0019379 sulfate assimilation, phosphoadenylyl sulfate reduction by phosphoadenylyl-sulfate reductase (thioredoxin); GO:0019419 sulfate reduction; GO:0044237 cellular metabolic process; GO:0055114 oxidation-reduction process;	GO:0005622 intracellular; GO:0005623 cell; GO:0005737 cytoplasm; GO:0009507 chloroplast; GO:0009532 plastid stroma; GO:0009536 plastid; GO:0009570 chloroplast stroma; GO:0043226 organelle; GO:0043227 membrane-bounded organelle; GO:0043229 intracellular organelle; GO:0043231 intracellular membrane-bounded organelle; GO:0044422 organelle part; GO:0044424 intracellular part; GO:0044434 chloroplast p…	GO:0003824 catalytic activity; GO:0004604 phosphoadenylyl-sulfate reductase (thioredoxin) activity; GO:0009973 adenylyl-sulfate reductase activity; GO:0016491 oxidoreductase activity; GO:0016667 oxidoreductase activity, acting on a sulfur group of donors; GO:0016671 oxidoreductase activity, acting on a sulfur group of donors, disulfide as acceptor;	K05907	APR; adenylyl-sulfate reductase (glutathione) [EC:1.8.4.9]	cann00920 Sulfur metabolism; cann01100 Metabolic pathways	PF00085	Thioredoxin	EO	KOG0191	Thioredoxin/protein disulfide isomerase
Capana02g000286	YHKF_SCHPO Uncharacterized RNA-binding protein C660.15 OS=Schizosaccharomyces pombe (strain 972 / ATCC 24843) GN=SPBC660.15 PE=2 SV=1	SPBC660.15	nucleus				K12741	HNRNPA1_3; heterogeneous nuclear ribonucleoprotein A1/A3	cann03040 Spliceosome	PF00076	RNA recognition motif. (a.k.a. RRM, RBD, or RNP domain)	A	KOG0118	FOG: RRM domain
Capana02g000292	CSGA_MYXXA C-factor OS=Myxococcus xanthus GN=csgA PE=1 SV=1	csgA	nucleus	GO:0008152 metabolic process; GO:0009636 response to toxic substance; GO:0009987 cellular process; GO:0010033 response to organic substance; GO:0042221 response to chemical; GO:0050896 response to stimulus; GO:0051716 cellular response to stimulus; GO:0055114 oxidation-reduction process; GO:0070887 cellular response to chemical stimulus; GO:0097237 cellular response to toxic substance; GO:0098754…		GO:0003824 catalytic activity; GO:0016491 oxidoreductase activity;				PF00106	short chain dehydrogenase	Q	KOG1611	Predicted short chain-type dehydrogenase
Capana02g000308	"SUCA2_SOLLC Succinyl-CoA ligase [ADP-forming] subunit alpha-2, mitochondrial OS=Solanum lycopersicum PE=1 SV=1"	---	chloroplast	GO:0006082 organic acid metabolic process; GO:0006091 generation of precursor metabolites and energy; GO:0006099 tricarboxylic acid cycle; GO:0006101 citrate metabolic process; GO:0006104 succinyl-CoA metabolic process; GO:0006105 succinate metabolic process; GO:0006139 nucleobase-containing compound metabolic process; GO:0006163 purine nucleotide metabolic process; GO:0006637 acyl-CoA metabolic …	GO:0005618 cell wall; GO:0005622 intracellular; GO:0005623 cell; GO:0005737 cytoplasm; GO:0005739 mitochondrion; GO:0005759 mitochondrial matrix; GO:0030312 external encapsulating structure; GO:0031974 membrane-enclosed lumen; GO:0043226 organelle; GO:0043227 membrane-bounded organelle; GO:0043229 intracellular organelle; GO:0043231 intracellular membrane-bounded organelle; GO:0043233 organelle l…	GO:0003824 catalytic activity; GO:0004774 succinate-CoA ligase activity; GO:0004775 succinate-CoA ligase (ADP-forming) activity; GO:0004776 succinate-CoA ligase (GDP-forming) activity; GO:0005488 binding; GO:0005507 copper ion binding; GO:0016874 ligase activity; GO:0016877 ligase activity, forming carbon-sulfur bonds; GO:0016878 acid-thiol ligase activity; GO:0043167 ion binding; GO:0043169 cati…	K01899	LSC1; succinyl-CoA synthetase alpha subunit [EC:6.2.1.4 6.2.1.5]	cann00020 Citrate cycle (TCA cycle); cann00640 Propanoate metabolism; cann01100 Metabolic pathways; cann01110 Biosynthesis of secondary metabolites; cann01200 Carbon metabolism	PF02629; PF00549	CoA binding domain; CoA-ligase	C	KOG1255	Succinyl-CoA synthetase, alpha subunit
Capana02g000319	DPE2_ARATH 4-alpha-glucanotransferase DPE2 OS=Arabidopsis thaliana GN=DPE2 PE=1 SV=1	DPE2	nucleus	GO:0000023 maltose metabolic process; GO:0000025 maltose catabolic process; GO:0000272 polysaccharide catabolic process; GO:0005975 carbohydrate metabolic process; GO:0005976 polysaccharide metabolic process; GO:0005977 glycogen metabolic process; GO:0005982 starch metabolic process; GO:0005983 starch catabolic process; GO:0005984 disaccharide metabolic process; GO:0006073 cellular glucan metabol…	GO:0005622 intracellular; GO:0005623 cell; GO:0005737 cytoplasm; GO:0005829 cytosol; GO:0044424 intracellular part; GO:0044444 cytoplasmic part; GO:0044464 cell part;	GO:0001871 pattern binding; GO:0003824 catalytic activity; GO:0004133 glycogen debranching enzyme activity; GO:0004134 4-alpha-glucanotransferase activity; GO:0005488 binding; GO:0010297 heteropolysaccharide binding; GO:0016740 transferase activity; GO:0016757 transferase activity, transferring glycosyl groups; GO:0016758 transferase activity, transferring hexosyl groups; GO:0030246 carbohydrate …	K00705	malQ; 4-alpha-glucanotransferase [EC:2.4.1.25]	cann00500 Starch and sucrose metabolism; cann01100 Metabolic pathways; cann01110 Biosynthesis of secondary metabolites	PF02446	4-alpha-glucanotransferase
Capana02g000339	DIM_PEA Delta(24)-sterol reductase OS=Pisum sativum GN=DIM PE=1 SV=1	DIM	cytoplasm				K09828	DHCR24, DWF1; Delta24-sterol reductase [EC:1.3.1.72 1.3.1.-]	cann00100 Steroid biosynthesis; cann01100 Metabolic pathways; cann01110 Biosynthesis of secondary metabolites	PF01565	FAD binding domain	C	KOG1262	FAD-binding protein DIMINUTO
Capana02g000437	ATAD3_XENTR ATPase family AAA domain-containing protein 3 OS=Xenopus tropicalis GN=atad3 PE=2 SV=1	atad3	chloroplast				K17681	ATAD3A_B; ATPase family AAA domain-containing protein 3A/B		PF00004	ATPase family associated with various cellular activities (AAA)	O	KOG0742	AAA+-type ATPase
Capana02g000489	"ALFC2_ARATH Probable fructose-bisphosphate aldolase 2, chloroplastic OS=Arabidopsis thaliana GN=FBA2 PE=1 SV=2"	FBA2	chloroplast				K01623	ALDO; fructose-bisphosphate aldolase, class I [EC:4.1.2.13]	cann00010 Glycolysis / Gluconeogenesis; cann00030 Pentose phosphate pathway; cann00051 Fructose and mannose metabolism; cann00710 Carbon fixation in photosynthetic organisms; cann01100 Metabolic pathways; cann01110 Biosynthesis of secondary metabolites; cann01200 Carbon metabolism; cann01230 Biosynthesis of amino acids	PF00274	Fructose-bisphosphate aldolase class-I	G	KOG1557	Fructose-biphosphate aldolase
Capana02g000490	"Putative dnaJ, mitochondrial-like"	---	plasma membrane
Capana02g000541	"RBS_CAPAN Ribulose bisphosphate carboxylase small chain, chloroplastic OS=Capsicum annuum GN=RBCS PE=2 SV=1"	RBCS	chloroplast		GO:0005622 intracellular; GO:0005623 cell; GO:0005737 cytoplasm; GO:0009507 chloroplast; GO:0009536 plastid; GO:0043226 organelle; GO:0043227 membrane-bounded organelle; GO:0043229 intracellular organelle; GO:0043231 intracellular membrane-bounded organelle; GO:0044424 intracellular part; GO:0044444 cytoplasmic part; GO:0044464 cell part;		K01602	rbcS; ribulose-bisphosphate carboxylase small chain [EC:4.1.1.39]	cann00630 Glyoxylate and dicarboxylate metabolism; cann00710 Carbon fixation in photosynthetic organisms; cann01100 Metabolic pathways; cann01110 Biosynthesis of secondary metabolites; cann01200 Carbon metabolism	PF00101	Ribulose bisphosphate carboxylase, small chain
Capana02g000557	MGN_ORYSJ Protein mago nashi homolog OS=Oryza sativa subsp. japonica GN=Os12g0287200 PE=2 SV=2	Os12g0287200	cytoplasm	GO:0000003 reproduction; GO:0003006 developmental process involved in reproduction; GO:0006139 nucleobase-containing compound metabolic process; GO:0006396 RNA processing; GO:0006725 cellular aromatic compound metabolic process; GO:0006807 nitrogen compound metabolic process; GO:0006935 chemotaxis; GO:0007275 multicellular organism development; GO:0008152 metabolic process; GO:0008380 RNA splicin…	GO:0005622 intracellular; GO:0005623 cell; GO:0005634 nucleus; GO:0005654 nucleoplasm; GO:0005730 nucleolus; GO:0005737 cytoplasm; GO:0009507 chloroplast; GO:0009536 plastid; GO:0016604 nuclear body; GO:0016607 nuclear speck; GO:0031974 membrane-enclosed lumen; GO:0031981 nuclear lumen; GO:0032991 macromolecular complex; GO:0035145 exon-exon junction complex; GO:0043226 organelle; GO:0043227 memb…		K12877	MAGOH; protein mago nashi	cann03013 RNA transport; cann03015 mRNA surveillance pathway; cann03040 Spliceosome			A	KOG3392	Exon-exon junction complex, Magoh component
Capana02g000567	RD23C_ARATH Putative DNA repair protein RAD23-3 OS=Arabidopsis thaliana GN=RAD23-3 PE=2 SV=2	RAD23-3	cytoplasm				K10839	RAD23, HR23; UV excision repair protein RAD23	cann03420 Nucleotide excision repair; cann04141 Protein processing in endoplasmic reticulum	PF00240; PF00627; PF09280	Ubiquitin family; UBA/TS-N domain; XPC-binding domain	L	KOG0011	Nucleotide excision repair factor NEF2, RAD23 component
Capana02g000662	CSK2A_MAIZE Casein kinase II subunit alpha OS=Zea mays GN=ACK2 PE=1 SV=1	ACK2	chloroplast				K03097	CSNK2A; casein kinase II subunit alpha [EC:2.7.11.1]	cann03008 Ribosome biogenesis in eukaryotes; cann04712 Circadian rhythm - plant	PF00069	Protein kinase domain	T	KOG0668	Casein kinase II, alpha subunit
Capana02g000667	RL261_ARATH 60S ribosomal protein L26-1 OS=Arabidopsis thaliana GN=RPL26A PE=2 SV=2	RPL26A	cytoplasm	GO:0002181 cytoplasmic translation; GO:0006412 translation; GO:0006518 peptide metabolic process; GO:0006807 nitrogen compound metabolic process; GO:0006950 response to stress; GO:0008152 metabolic process; GO:0009058 biosynthetic process; GO:0009059 macromolecule biosynthetic process; GO:0009266 response to temperature stimulus; GO:0009409 response to cold; GO:0009628 response to abiotic stimulu…	GO:0005622 intracellular; GO:0005623 cell; GO:0005634 nucleus; GO:0005730 nucleolus; GO:0005737 cytoplasm; GO:0005773 vacuole; GO:0005774 vacuolar membrane; GO:0005829 cytosol; GO:0005840 ribosome; GO:0005844 polysome; GO:0005886 plasma membrane; GO:0009507 chloroplast; GO:0009536 plastid; GO:0015934 large ribosomal subunit; GO:0016020 membrane; GO:0022625 cytosolic large ribosomal subunit; GO:00…	GO:0003676 nucleic acid binding; GO:0003723 RNA binding; GO:0003729 mRNA binding; GO:0003735 structural constituent of ribosome; GO:0005198 structural molecule activity; GO:0005488 binding; GO:0097159 organic cyclic compound binding; GO:1901363 heterocyclic compound binding;	K02898	RP-L26e, RPL26; large subunit ribosomal protein L26e	cann03010 Ribosome			J	KOG3401	60S ribosomal protein L26
Capana02g000690	Putative ovule protein (Fragment)	---	chloroplast
Capana02g000741	SYLC_CAEEL Leucine--tRNA ligase OS=Caenorhabditis elegans GN=lrs-1 PE=2 SV=2	lrs-1	nucleus	GO:0001101 response to acid chemical; GO:0006082 organic acid metabolic process; GO:0006139 nucleobase-containing compound metabolic process; GO:0006399 tRNA metabolic process; GO:0006412 translation; GO:0006418 tRNA aminoacylation for protein translation; GO:0006425 glutaminyl-tRNA aminoacylation; GO:0006429 leucyl-tRNA aminoacylation; GO:0006438 valyl-tRNA aminoacylation; GO:0006518 peptide met…	GO:0000323 lytic vacuole; GO:0005622 intracellular; GO:0005623 cell; GO:0005634 nucleus; GO:0005654 nucleoplasm; GO:0005737 cytoplasm; GO:0005764 lysosome; GO:0005773 vacuole; GO:0005783 endoplasmic reticulum; GO:0005829 cytosol; GO:0005911 cell-cell junction; GO:0009506 plasmodesma; GO:0009507 chloroplast; GO:0009536 plastid; GO:0012505 endomembrane system; GO:0016604 nuclear body; GO:0017101 am…	GO:0003824 catalytic activity; GO:0004812 aminoacyl-tRNA ligase activity; GO:0004819 glutamine-tRNA ligase activity; GO:0004823 leucine-tRNA ligase activity; GO:0004832 valine-tRNA ligase activity; GO:0005096 GTPase activator activity; GO:0008047 enzyme activator activity; GO:0016874 ligase activity; GO:0016875 ligase activity, forming carbon-oxygen bonds; GO:0030234 enzyme regulator activity; GO…	K01869	LARS, leuS; leucyl-tRNA synthetase [EC:6.1.1.4]	cann00970 Aminoacyl-tRNA biosynthesis	PF08264	Anticodon-binding domain of tRNA	J	KOG0437	Leucyl-tRNA synthetase
Capana02g000764	"PSBO_SOLLC Oxygen-evolving enhancer protein 1, chloroplastic OS=Solanum lycopersicum GN=PSBO PE=2 SV=2"	PSBO	chloroplast		GO:0005622 intracellular; GO:0005623 cell; GO:0005737 cytoplasm; GO:0009507 chloroplast; GO:0009534 chloroplast thylakoid; GO:0009535 chloroplast thylakoid membrane; GO:0009536 plastid; GO:0009579 thylakoid; GO:0016020 membrane; GO:0031976 plastid thylakoid; GO:0031984 organelle subcompartment; GO:0034357 photosynthetic membrane; GO:0042651 thylakoid membrane; GO:0043226 organelle; GO:0043227 mem…		K02716	psbO; photosystem II oxygen-evolving enhancer protein 1	cann00195 Photosynthesis
Capana02g000772	ST14_SOLTU STS14 protein OS=Solanum tuberosum GN=STS14 PE=2 SV=1	STS14	chloroplast							PF00188	Cysteine-rich secretory protein family	S	KOG3017	Defense-related protein containing SCP domain
Capana02g000828	coilin-like	---	nucleus	GO:0006139 nucleobase-containing compound metabolic process; GO:0006396 RNA processing; GO:0006725 cellular aromatic compound metabolic process; GO:0006807 nitrogen compound metabolic process; GO:0008152 metabolic process; GO:0009987 cellular process; GO:0010467 gene expression; GO:0016070 RNA metabolic process; GO:0034641 cellular nitrogen compound metabolic process; GO:0043170 macromolecule met…		GO:0003676 nucleic acid binding; GO:0003723 RNA binding; GO:0005488 binding; GO:0017069 snRNA binding; GO:0030619 U1 snRNA binding; GO:0030620 U2 snRNA binding; GO:0097159 organic cyclic compound binding; GO:1901363 heterocyclic compound binding;	K13150	COIL, CLN80; coilin
Capana02g000833	"METB_ARATH Cystathionine gamma-synthase, chloroplastic OS=Arabidopsis thaliana GN=CGS1 PE=2 SV=3"	CGS1	chloroplast	GO:0000096 sulfur amino acid metabolic process; GO:0000097 sulfur amino acid biosynthetic process; GO:0001887 selenium compound metabolic process; GO:0006082 organic acid metabolic process; GO:0006520 cellular amino acid metabolic process; GO:0006555 methionine metabolic process; GO:0006790 sulfur compound metabolic process; GO:0006807 nitrogen compound metabolic process; GO:0008152 metabolic pro…	GO:0005622 intracellular; GO:0005623 cell; GO:0005737 cytoplasm; GO:0009507 chloroplast; GO:0009532 plastid stroma; GO:0009536 plastid; GO:0009570 chloroplast stroma; GO:0043226 organelle; GO:0043227 membrane-bounded organelle; GO:0043229 intracellular organelle; GO:0043231 intracellular membrane-bounded organelle; GO:0044422 organelle part; GO:0044424 intracellular part; GO:0044434 chloroplast p…	GO:0003824 catalytic activity; GO:0003962 cystathionine gamma-synthase activity; GO:0005488 binding; GO:0008144 drug binding; GO:0016740 transferase activity; GO:0016765 transferase activity, transferring alkyl or aryl (other than methyl) groups; GO:0019842 vitamin binding; GO:0030170 pyridoxal phosphate binding; GO:0036094 small molecule binding; GO:0043167 ion binding; GO:0043168 anion binding;…	K01739	metB; cystathionine gamma-synthase [EC:2.5.1.48]	cann00270 Cysteine and methionine metabolism; cann00450 Selenocompound metabolism; cann00920 Sulfur metabolism; cann01100 Metabolic pathways; cann01110 Biosynthesis of secondary metabolites; cann01230 Biosynthesis of amino acids	PF01053	Cys/Met metabolism PLP-dependent enzyme	E	KOG0053	Cystathionine beta-lyases/cystathionine gamma-synthases
Capana02g000862	CYF_ATRBE Apocytochrome f OS=Atropa belladonna GN=petA PE=3 SV=1	petA	nucleus	GO:0006091 generation of precursor metabolites and energy; GO:0008152 metabolic process; GO:0009767 photosynthetic electron transport chain; GO:0009987 cellular process; GO:0015979 photosynthesis; GO:0019684 photosynthesis, light reaction; GO:0022900 electron transport chain; GO:0044237 cellular metabolic process; GO:0055114 oxidation-reduction process;	GO:0005622 intracellular; GO:0005623 cell; GO:0005737 cytoplasm; GO:0009507 chloroplast; GO:0009512 cytochrome b6f complex; GO:0009534 chloroplast thylakoid; GO:0009535 chloroplast thylakoid membrane; GO:0009536 plastid; GO:0009579 thylakoid; GO:0016020 membrane; GO:0031976 plastid thylakoid; GO:0031984 organelle subcompartment; GO:0032991 macromolecular complex; GO:0034357 photosynthetic membran…		K02634	petA; apocytochrome f	cann00195 Photosynthesis; cann01100 Metabolic pathways	PF01333	Apocytochrome F, C-terminal
Capana02g000868	AMY1_HORVU Alpha-amylase type A isozyme OS=Hordeum vulgare GN=AMY1.1 PE=1 SV=1	AMY1.1	cytoplasm				K01176	AMY, amyA, malS; alpha-amylase [EC:3.2.1.1]	cann00500 Starch and sucrose metabolism; cann01100 Metabolic pathways	PF00128; PF07821	Alpha amylase, catalytic domain; Alpha-amylase C-terminal beta-sheet domain	G	KOG0471	Alpha-amylase
Capana02g000894	Y637_PELLD UPF0301 protein Plut_0637 OS=Pelodictyon luteolum (strain DSM 273) GN=Plut_0637 PE=3 SV=1	Plut_0637	chloroplast				K07735	algH; putative transcriptional regulator
Capana02g000933	VDAC1_SOLTU Mitochondrial outer membrane protein porin of 34 kDa OS=Solanum tuberosum PE=1 SV=2	---	cytoplasm	GO:0006091 generation of precursor metabolites and energy; GO:0006810 transport; GO:0006811 ion transport; GO:0006820 anion transport; GO:0006950 response to stress; GO:0006952 defense response; GO:0008152 metabolic process; GO:0009060 aerobic respiration; GO:0009266 response to temperature stimulus; GO:0009409 response to cold; GO:0009605 response to external stimulus; GO:0009607 response to bio…	GO:0005618 cell wall; GO:0005622 intracellular; GO:0005623 cell; GO:0005634 nucleus; GO:0005730 nucleolus; GO:0005737 cytoplasm; GO:0005739 mitochondrion; GO:0005740 mitochondrial envelope; GO:0005741 mitochondrial outer membrane; GO:0005773 vacuole; GO:0005774 vacuolar membrane; GO:0005886 plasma membrane; GO:0009507 chloroplast; GO:0009526 plastid envelope; GO:0009527 plastid outer membrane; GO…	GO:0005215 transporter activity; GO:0005216 ion channel activity; GO:0005244 voltage-gated ion channel activity; GO:0005253 anion channel activity; GO:0008308 voltage-gated anion channel activity; GO:0008509 anion transmembrane transporter activity; GO:0015075 ion transmembrane transporter activity; GO:0015103 inorganic anion transmembrane transporter activity; GO:0015267 channel activity; GO:001…	K15040	VDAC2; voltage-dependent anion channel protein 2				P	KOG3126	Porin/voltage-dependent anion-selective channel protein
Capana02g001004	AIM32_DEBHA Altered inheritance of mitochondria protein 32 OS=Debaryomyces hansenii (strain ATCC 36239 / CBS 767 / JCM 1990 / NBRC 0083 / IGC 2968) GN=AIM32 PE=3 SV=2	AIM32	cytoplasm
Capana02g001016	GPDA_CUPLA Glycerol-3-phosphate dehydrogenase [NAD(+)] OS=Cuphea lanceolata GN=GPDH PE=2 SV=1	GPDH	cytoplasm				K00006	GPD1; glycerol-3-phosphate dehydrogenase (NAD+) [EC:1.1.1.8]	cann00564 Glycerophospholipid metabolism; cann01110 Biosynthesis of secondary metabolites	PF07479	NAD-dependent glycerol-3-phosphate dehydrogenase C-terminus	C	KOG2711	Glycerol-3-phosphate dehydrogenase/dihydroxyacetone 3-phosphate reductase
Capana02g001130	SPI1_SOLTU Serine protease inhibitor 1 OS=Solanum tuberosum PE=1 SV=2	---	extracellular							PF00197	Trypsin and protease inhibitor
Capana02g001139	VATF_ARATH V-type proton ATPase subunit F OS=Arabidopsis thaliana GN=VHA-F PE=2 SV=1	VHA-F	chloroplast	GO:0006810 transport; GO:0006811 ion transport; GO:0034220 ion transmembrane transport; GO:0051179 localization; GO:0051234 establishment of localization; GO:0055085 transmembrane transport; GO:0090662 ATP hydrolysis coupled transmembrane transport; GO:0098660 inorganic ion transmembrane transport; GO:0099131 ATP hydrolysis coupled ion transmembrane transport;	GO:0005622 intracellular; GO:0005623 cell; GO:0005737 cytoplasm; GO:0005773 vacuole; GO:0005774 vacuolar membrane; GO:0005794 Golgi apparatus; GO:0005886 plasma membrane; GO:0012505 endomembrane system; GO:0016020 membrane; GO:0031090 organelle membrane; GO:0043226 organelle; GO:0043227 membrane-bounded organelle; GO:0043229 intracellular organelle; GO:0043231 intracellular membrane-bounded organ…	GO:0003824 catalytic activity; GO:0005215 transporter activity; GO:0015075 ion transmembrane transporter activity; GO:0015399 primary active transmembrane transporter activity; GO:0015405 P-P-bond-hydrolysis-driven transmembrane transporter activity; GO:0016462 pyrophosphatase activity; GO:0016787 hydrolase activity; GO:0016817 hydrolase activity, acting on acid anhydrides; GO:0016818 hydrolase a…	K02151	ATPeV1F, ATP6S14; V-type H+-transporting ATPase subunit F	cann00190 Oxidative phosphorylation; cann01100 Metabolic pathways; cann04145 Phagosome			C	KOG3432	Vacuolar H+-ATPase V1 sector, subunit F
Capana02g001150	UAP1_ARATH Probable UDP-N-acetylglucosamine pyrophosphorylase OS=Arabidopsis thaliana GN=At2g35020 PE=2 SV=1	At2g35020	nucleus	GO:0000003 reproduction; GO:0003006 developmental process involved in reproduction; GO:0006011 UDP-glucose metabolic process; GO:0006040 amino sugar metabolic process; GO:0006047 UDP-N-acetylglucosamine metabolic process; GO:0006048 UDP-N-acetylglucosamine biosynthetic process; GO:0006139 nucleobase-containing compound metabolic process; GO:0006725 cellular aromatic compound metabolic process; GO…	GO:0005622 intracellular; GO:0005623 cell; GO:0005737 cytoplasm; GO:0005829 cytosol; GO:0005886 plasma membrane; GO:0016020 membrane; GO:0044424 intracellular part; GO:0044444 cytoplasmic part; GO:0044464 cell part; GO:0071944 cell periphery;	GO:0003824 catalytic activity; GO:0003977 UDP-N-acetylglucosamine diphosphorylase activity; GO:0003983 UTP:glucose-1-phosphate uridylyltransferase activity; GO:0016740 transferase activity; GO:0016772 transferase activity, transferring phosphorus-containing groups; GO:0016779 nucleotidyltransferase activity; GO:0051748 UTP-monosaccharide-1-phosphate uridylyltransferase activity; GO:0052630 UDP-N-…	K00972	UAP1; UDP-N-acetylglucosamine/UDP-N-acetylgalactosamine diphosphorylase [EC:2.7.7.23 2.7.7.83]	cann00520 Amino sugar and nucleotide sugar metabolism; cann01100 Metabolic pathways			M	KOG2388	UDP-N-acetylglucosamine pyrophosphorylase
Capana02g001187	"IMPL1_ARATH Phosphatase IMPL1, chloroplastic OS=Arabidopsis thaliana GN=IMPL1 PE=1 SV=2"	IMPL1	chloroplast	GO:0005975 carbohydrate metabolic process; GO:0006020 inositol metabolic process; GO:0006066 alcohol metabolic process; GO:0006793 phosphorus metabolic process; GO:0006796 phosphate-containing compound metabolic process; GO:0007154 cell communication; GO:0007165 signal transduction; GO:0008152 metabolic process; GO:0009056 catabolic process; GO:0009987 cellular process; GO:0016311 dephosphorylati…	GO:0005622 intracellular; GO:0005623 cell; GO:0005737 cytoplasm; GO:0005829 cytosol; GO:0009507 chloroplast; GO:0009532 plastid stroma; GO:0009536 plastid; GO:0009570 chloroplast stroma; GO:0043226 organelle; GO:0043227 membrane-bounded organelle; GO:0043229 intracellular organelle; GO:0043231 intracellular membrane-bounded organelle; GO:0044422 organelle part; GO:0044424 intracellular part; GO:0…	GO:0003824 catalytic activity; GO:0008934 inositol monophosphate 1-phosphatase activity; GO:0016787 hydrolase activity; GO:0016788 hydrolase activity, acting on ester bonds; GO:0016791 phosphatase activity; GO:0042578 phosphoric ester hydrolase activity; GO:0052745 inositol phosphate phosphatase activity; GO:0052834 inositol monophosphate phosphatase activity;	K01092	E3.1.3.25, IMPA, suhB; myo-inositol-1(or 4)-monophosphatase [EC:3.1.3.25]	cann00562 Inositol phosphate metabolism; cann01100 Metabolic pathways; cann04070 Phosphatidylinositol signaling system			G	KOG2951	Inositol monophosphatase
Capana02g001195	"GCSH_FLAAN Glycine cleavage system H protein, mitochondrial OS=Flaveria anomala GN=GDCSH PE=2 SV=1"	GDCSH	mitochondria				K02437	gcvH, GCSH; glycine cleavage system H protein	cann00260 Glycine, serine and threonine metabolism; cann00630 Glyoxylate and dicarboxylate metabolism; cann01100 Metabolic pathways; cann01110 Biosynthesis of secondary metabolites; cann01200 Carbon metabolism	PF01597	Glycine cleavage H-protein	E	KOG3373	Glycine cleavage system H protein (lipoate-binding)
Capana02g001258	CATB_MACFA Cathepsin B OS=Macaca fascicularis GN=CTSB PE=2 SV=1	CTSB	extracellular	GO:0006508 proteolysis; GO:0006807 nitrogen compound metabolic process; GO:0008152 metabolic process; GO:0009056 catabolic process; GO:0009057 macromolecule catabolic process; GO:0009987 cellular process; GO:0019538 protein metabolic process; GO:0030163 protein catabolic process; GO:0043170 macromolecule metabolic process; GO:0044237 cellular metabolic process; GO:0044238 primary metabolic proces…	GO:0000323 lytic vacuole; GO:0005576 extracellular region; GO:0005615 extracellular space; GO:0005622 intracellular; GO:0005623 cell; GO:0005737 cytoplasm; GO:0005764 lysosome; GO:0005773 vacuole; GO:0005829 cytosol; GO:0043226 organelle; GO:0043227 membrane-bounded organelle; GO:0043229 intracellular organelle; GO:0043231 intracellular membrane-bounded organelle; GO:0044421 extracellular region …	GO:0003824 catalytic activity; GO:0004175 endopeptidase activity; GO:0004197 cysteine-type endopeptidase activity; GO:0008233 peptidase activity; GO:0008234 cysteine-type peptidase activity; GO:0016787 hydrolase activity; GO:0070011 peptidase activity, acting on L-amino acid peptides;	K01363	CTSB; cathepsin B [EC:3.4.22.1]		PF00112	Papain family cysteine protease	O	KOG1543	Cysteine proteinase Cathepsin L
Capana02g001264	"SYLC_HUMAN Leucine--tRNA ligase, cytoplasmic OS=Homo sapiens GN=LARS PE=1 SV=2"	LARS	cytoplasm	GO:0001101 response to acid chemical; GO:0006082 organic acid metabolic process; GO:0006139 nucleobase-containing compound metabolic process; GO:0006399 tRNA metabolic process; GO:0006412 translation; GO:0006418 tRNA aminoacylation for protein translation; GO:0006425 glutaminyl-tRNA aminoacylation; GO:0006429 leucyl-tRNA aminoacylation; GO:0006438 valyl-tRNA aminoacylation; GO:0006518 peptide met…	GO:0000323 lytic vacuole; GO:0005622 intracellular; GO:0005623 cell; GO:0005634 nucleus; GO:0005654 nucleoplasm; GO:0005737 cytoplasm; GO:0005764 lysosome; GO:0005773 vacuole; GO:0005783 endoplasmic reticulum; GO:0005829 cytosol; GO:0005911 cell-cell junction; GO:0009506 plasmodesma; GO:0009507 chloroplast; GO:0009536 plastid; GO:0012505 endomembrane system; GO:0016604 nuclear body; GO:0017101 am…	GO:0003824 catalytic activity; GO:0004812 aminoacyl-tRNA ligase activity; GO:0004819 glutamine-tRNA ligase activity; GO:0004823 leucine-tRNA ligase activity; GO:0004832 valine-tRNA ligase activity; GO:0005096 GTPase activator activity; GO:0008047 enzyme activator activity; GO:0016874 ligase activity; GO:0016875 ligase activity, forming carbon-oxygen bonds; GO:0030234 enzyme regulator activity; GO…	K01869	LARS, leuS; leucyl-tRNA synthetase [EC:6.1.1.4]	cann00970 Aminoacyl-tRNA biosynthesis	PF08264	Anticodon-binding domain of tRNA	J	KOG0437	Leucyl-tRNA synthetase
Capana02g001265	VA726_ARATH Putative vesicle-associated membrane protein 726 OS=Arabidopsis thaliana GN=VAMP726 PE=2 SV=2	VAMP726	cytoplasm	GO:0006810 transport; GO:0006887 exocytosis; GO:0006906 vesicle fusion; GO:0006996 organelle organization; GO:0009987 cellular process; GO:0016043 cellular component organization; GO:0016050 vesicle organization; GO:0016192 vesicle-mediated transport; GO:0032940 secretion by cell; GO:0046903 secretion; GO:0048284 organelle fusion; GO:0051179 localization; GO:0051234 establishment of localization;…	GO:0005622 intracellular; GO:0005623 cell; GO:0005737 cytoplasm; GO:0005768 endosome; GO:0005886 plasma membrane; GO:0009507 chloroplast; GO:0009536 plastid; GO:0012505 endomembrane system; GO:0016020 membrane; GO:0031201 SNARE complex; GO:0031410 cytoplasmic vesicle; GO:0031982 vesicle; GO:0032991 macromolecular complex; GO:0043226 organelle; GO:0043227 membrane-bounded organelle; GO:0043229 int…	GO:0000149 SNARE binding; GO:0005484 SNAP receptor activity; GO:0005488 binding; GO:0005515 protein binding;				PF13774	Regulated-SNARE-like domain	U	KOG0859	Synaptobrevin/VAMP-like protein
Capana02g001274	CATB_PONAB Cathepsin B OS=Pongo abelii GN=CTSB PE=2 SV=1	CTSB	extracellular	GO:0006508 proteolysis; GO:0006807 nitrogen compound metabolic process; GO:0008152 metabolic process; GO:0009056 catabolic process; GO:0009057 macromolecule catabolic process; GO:0009987 cellular process; GO:0019538 protein metabolic process; GO:0030163 protein catabolic process; GO:0043170 macromolecule metabolic process; GO:0044237 cellular metabolic process; GO:0044238 primary metabolic proces…	GO:0000323 lytic vacuole; GO:0005576 extracellular region; GO:0005615 extracellular space; GO:0005622 intracellular; GO:0005623 cell; GO:0005737 cytoplasm; GO:0005764 lysosome; GO:0005773 vacuole; GO:0005829 cytosol; GO:0043226 organelle; GO:0043227 membrane-bounded organelle; GO:0043229 intracellular organelle; GO:0043231 intracellular membrane-bounded organelle; GO:0044421 extracellular region …	GO:0003824 catalytic activity; GO:0004175 endopeptidase activity; GO:0004197 cysteine-type endopeptidase activity; GO:0008233 peptidase activity; GO:0008234 cysteine-type peptidase activity; GO:0016787 hydrolase activity; GO:0070011 peptidase activity, acting on L-amino acid peptides;	K01363	CTSB; cathepsin B [EC:3.4.22.1]		PF00112	Papain family cysteine protease	O	KOG1543	Cysteine proteinase Cathepsin L
Capana02g001277	CATB_PONAB Cathepsin B OS=Pongo abelii GN=CTSB PE=2 SV=1	CTSB	cytoplasm	GO:0006508 proteolysis; GO:0006807 nitrogen compound metabolic process; GO:0008152 metabolic process; GO:0009056 catabolic process; GO:0009057 macromolecule catabolic process; GO:0009987 cellular process; GO:0019538 protein metabolic process; GO:0030163 protein catabolic process; GO:0043170 macromolecule metabolic process; GO:0044237 cellular metabolic process; GO:0044238 primary metabolic proces…	GO:0000323 lytic vacuole; GO:0005576 extracellular region; GO:0005615 extracellular space; GO:0005622 intracellular; GO:0005623 cell; GO:0005737 cytoplasm; GO:0005764 lysosome; GO:0005773 vacuole; GO:0005829 cytosol; GO:0043226 organelle; GO:0043227 membrane-bounded organelle; GO:0043229 intracellular organelle; GO:0043231 intracellular membrane-bounded organelle; GO:0044421 extracellular region …	GO:0003824 catalytic activity; GO:0004175 endopeptidase activity; GO:0004197 cysteine-type endopeptidase activity; GO:0008233 peptidase activity; GO:0008234 cysteine-type peptidase activity; GO:0016787 hydrolase activity; GO:0070011 peptidase activity, acting on L-amino acid peptides;	K01363	CTSB; cathepsin B [EC:3.4.22.1]		PF00112	Papain family cysteine protease	O	KOG1543	Cysteine proteinase Cathepsin L
Capana02g001336	COPE1_ARATH Coatomer subunit epsilon-1 OS=Arabidopsis thaliana GN=At1g30630 PE=2 SV=1	At1g30630	cytoplasm	GO:0006810 transport; GO:0006888 ER to Golgi vesicle-mediated transport; GO:0006890 retrograde vesicle-mediated transport, Golgi to ER; GO:0006891 intra-Golgi vesicle-mediated transport; GO:0016192 vesicle-mediated transport; GO:0046907 intracellular transport; GO:0048193 Golgi vesicle transport; GO:0051179 localization; GO:0051234 establishment of localization; GO:0051641 cellular localization; …	GO:0005622 intracellular; GO:0005623 cell; GO:0005737 cytoplasm; GO:0005773 vacuole; GO:0005774 vacuolar membrane; GO:0005794 Golgi apparatus; GO:0005798 Golgi-associated vesicle; GO:0005829 cytosol; GO:0012505 endomembrane system; GO:0012506 vesicle membrane; GO:0016020 membrane; GO:0030117 membrane coat; GO:0030120 vesicle coat; GO:0030126 COPI vesicle coat; GO:0030135 coated vesicle; GO:003013…		K17268	COPE; coatomer subunit epsilon				U	KOG3081	Vesicle coat complex COPI, epsilon subunit
Capana02g001352	RETOL_ARATH Reticuline oxidase-like protein OS=Arabidopsis thaliana GN=At4g20830 PE=1 SV=2	At4g20830	chloroplast	GO:0006950 response to stress; GO:0006979 response to oxidative stress; GO:0050896 response to stimulus;	GO:0005618 cell wall; GO:0005623 cell; GO:0005911 cell-cell junction; GO:0009506 plasmodesma; GO:0030054 cell junction; GO:0030312 external encapsulating structure; GO:0044464 cell part; GO:0055044 symplast; GO:0071944 cell periphery;		K22395	cann00940 Phenylpropanoid biosynthesis; cann01100 Metabolic pathways; cann01110 Biosynthesis of secondary metabolites		PF01565; PF08031	FAD binding domain ; Berberine and berberine like
Capana02g001384	RLA0_SOYBN 60S acidic ribosomal protein P0 OS=Glycine max PE=2 SV=1	---	cytoplasm	GO:0006950 response to stress; GO:0009628 response to abiotic stimulus; GO:0034059 response to anoxia; GO:0036293 response to decreased oxygen levels; GO:0050896 response to stimulus; GO:0070482 response to oxygen levels;	GO:0005622 intracellular; GO:0005623 cell; GO:0005737 cytoplasm; GO:0005829 cytosol; GO:0005840 ribosome; GO:0015934 large ribosomal subunit; GO:0022625 cytosolic large ribosomal subunit; GO:0022626 cytosolic ribosome; GO:0032991 macromolecular complex; GO:0043226 organelle; GO:0043228 non-membrane-bounded organelle; GO:0043229 intracellular organelle; GO:0043232 intracellular non-membrane-bounde…	GO:0003735 structural constituent of ribosome; GO:0005198 structural molecule activity; GO:0005488 binding; GO:0044877 macromolecular complex binding;	K02941	RP-LP0, RPLP0; large subunit ribosomal protein LP0	cann03010 Ribosome			J	KOG0815	60S acidic ribosomal protein P0
Capana02g001438	RL321_ARATH 60S ribosomal protein L32-1 OS=Arabidopsis thaliana GN=RPL32A PE=2 SV=2	RPL32A	cytoplasm		GO:0005622 intracellular; GO:0005623 cell; GO:0005634 nucleus; GO:0005730 nucleolus; GO:0005737 cytoplasm; GO:0005829 cytosol; GO:0005840 ribosome; GO:0005844 polysome; GO:0015934 large ribosomal subunit; GO:0022625 cytosolic large ribosomal subunit; GO:0022626 cytosolic ribosome; GO:0031974 membrane-enclosed lumen; GO:0031981 nuclear lumen; GO:0032991 macromolecular complex; GO:0042788 polysomal…	GO:0003735 structural constituent of ribosome; GO:0005198 structural molecule activity;	K02912	RP-L32e, RPL32; large subunit ribosomal protein L32e	cann03010 Ribosome			J	KOG0878	60S ribosomal protein L32
Capana02g001443	RS4_SOLTU 40S ribosomal protein S4 OS=Solanum tuberosum GN=RPS4 PE=2 SV=1	RPS4	cytoplasm	GO:0006412 translation; GO:0006518 peptide metabolic process; GO:0006807 nitrogen compound metabolic process; GO:0008152 metabolic process; GO:0009058 biosynthetic process; GO:0009059 macromolecule biosynthetic process; GO:0009987 cellular process; GO:0010467 gene expression; GO:0019538 protein metabolic process; GO:0034641 cellular nitrogen compound metabolic process; GO:0034645 cellular macromo…	GO:0005622 intracellular; GO:0005623 cell; GO:0005634 nucleus; GO:0005730 nucleolus; GO:0005737 cytoplasm; GO:0005773 vacuole; GO:0005774 vacuolar membrane; GO:0005829 cytosol; GO:0005840 ribosome; GO:0005886 plasma membrane; GO:0009507 chloroplast; GO:0009536 plastid; GO:0015935 small ribosomal subunit; GO:0016020 membrane; GO:0022626 cytosolic ribosome; GO:0022627 cytosolic small ribosomal subu…	GO:0003676 nucleic acid binding; GO:0003723 RNA binding; GO:0003729 mRNA binding; GO:0003735 structural constituent of ribosome; GO:0005198 structural molecule activity; GO:0005488 binding; GO:0097159 organic cyclic compound binding; GO:1901363 heterocyclic compound binding;	K02987	RP-S4e, RPS4; small subunit ribosomal protein S4e	cann03010 Ribosome	PF08071; PF01479	RS4NT (NUC023) domain; S4 domain	J	KOG0378	40S ribosomal protein S4
Capana02g001487	GRS17_ARATH Monothiol glutaredoxin-S17 OS=Arabidopsis thaliana GN=GRXS17 PE=2 SV=1	GRXS17	cytoplasm	GO:0006810 transport; GO:0006950 response to stress; GO:0006974 cellular response to DNA damage stimulus; GO:0008152 metabolic process; GO:0009266 response to temperature stimulus; GO:0009408 response to heat; GO:0009628 response to abiotic stimulus; GO:0009914 hormone transport; GO:0009926 auxin polar transport; GO:0009987 cellular process; GO:0010817 regulation of hormone levels; GO:0033554 cel…	GO:0005622 intracellular; GO:0005623 cell; GO:0005737 cytoplasm; GO:0005829 cytosol; GO:0044424 intracellular part; GO:0044444 cytoplasmic part; GO:0044464 cell part;					PF00085; PF00462	Thioredoxin; Glutaredoxin	O	KOG0911	Glutaredoxin-related protein
Capana02g001498	GPMB_ECOUT Probable phosphoglycerate mutase gpmB OS=Escherichia coli (strain UTI89 / UPEC) GN=gpmB PE=3 SV=1	gpmB	cytoplasm				K15637	PGAM5; serine/threonine-protein phosphatase PGAM5 [EC:3.1.3.16]		PF00300	Histidine phosphatase superfamily (branch 1)	G	KOG0235	Phosphoglycerate mutase
Capana02g001555	Putative ovule protein	---	chloroplast
Capana02g001556	"KASC1_ARATH 3-oxoacyl-[acyl-carrier-protein] synthase I, chloroplastic OS=Arabidopsis thaliana GN=KAS1 PE=1 SV=2"	KAS1	chloroplast				K09458	fabF; 3-oxoacyl-[acyl-carrier-protein] synthase II [EC:2.3.1.179]	cann00061 Fatty acid biosynthesis; cann00780 Biotin metabolism; cann01100 Metabolic pathways; cann01212 Fatty acid metabolism	PF00109; PF02801	Beta-ketoacyl synthase, N-terminal domain; Beta-ketoacyl synthase, C-terminal domain	H	KOG1394	3-oxoacyl-(acyl-carrier-protein) synthase (I and II)
Capana02g001558	NAD(P)-bd_dom domain-containing protein	---	chloroplast		GO:0005622 intracellular; GO:0005623 cell; GO:0005737 cytoplasm; GO:0009507 chloroplast; GO:0009526 plastid envelope; GO:0009532 plastid stroma; GO:0009534 chloroplast thylakoid; GO:0009535 chloroplast thylakoid membrane; GO:0009536 plastid; GO:0009570 chloroplast stroma; GO:0009579 thylakoid; GO:0009941 chloroplast envelope; GO:0010287 plastoglobule; GO:0016020 membrane; GO:0031967 organelle env…					PF13460	NADH(P)-binding	G	KOG1203	Predicted dehydrogenase
Capana02g001575	Putative signaling mucin HKR1-like	---	nucleus
Capana02g001645	CIA30_ARATH Probable complex I intermediate-associated protein 30 OS=Arabidopsis thaliana GN=At1g17350 PE=1 SV=2	At1g17350	chloroplast							PF13460	NADH(P)-binding	G	KOG1203	Predicted dehydrogenase
Capana02g001646	STLP2_ARATH SEC12-like protein 2 OS=Arabidopsis thaliana GN=STL2P PE=1 SV=4	STL2P	chloroplast	GO:0002790 peptide secretion; GO:0003400 regulation of COPII vesicle coating; GO:0006810 transport; GO:0006888 ER to Golgi vesicle-mediated transport; GO:0008104 protein localization; GO:0009306 protein secretion; GO:0009987 cellular process; GO:0015031 protein transport; GO:0015833 peptide transport; GO:0016192 vesicle-mediated transport; GO:0032386 regulation of intracellular transport; GO:0032…	GO:0005622 intracellular; GO:0005623 cell; GO:0005737 cytoplasm; GO:0005773 vacuole; GO:0005774 vacuolar membrane; GO:0005783 endoplasmic reticulum; GO:0005789 endoplasmic reticulum membrane; GO:0005886 plasma membrane; GO:0012505 endomembrane system; GO:0016020 membrane; GO:0016021 integral component of membrane; GO:0030176 integral component of endoplasmic reticulum membrane; GO:0031090 organel…	GO:0005085 guanyl-nucleotide exchange factor activity; GO:0005090 Sar guanyl-nucleotide exchange factor activity; GO:0005096 GTPase activator activity; GO:0005488 binding; GO:0005515 protein binding; GO:0008047 enzyme activator activity; GO:0019899 enzyme binding; GO:0030234 enzyme regulator activity; GO:0030695 GTPase regulator activity; GO:0051020 GTPase binding; GO:0060589 nucleoside-triphosph…	K14003	PREB, SEC12; prolactin regulatory element-binding protein	cann04141 Protein processing in endoplasmic reticulum			U	KOG0771	Prolactin regulatory element-binding protein/Protein transport protein SEC12p
Capana02g001675	"HISX_ARATH Histidinol dehydrogenase, chloroplastic OS=Arabidopsis thaliana GN=HDH PE=2 SV=1"	HDH	chloroplast	GO:0000105 histidine biosynthetic process; GO:0006082 organic acid metabolic process; GO:0006520 cellular amino acid metabolic process; GO:0006547 histidine metabolic process; GO:0006725 cellular aromatic compound metabolic process; GO:0006807 nitrogen compound metabolic process; GO:0007275 multicellular organism development; GO:0008152 metabolic process; GO:0008652 cellular amino acid biosynthet…	GO:0005622 intracellular; GO:0005623 cell; GO:0005737 cytoplasm; GO:0009507 chloroplast; GO:0009532 plastid stroma; GO:0009536 plastid; GO:0009570 chloroplast stroma; GO:0043226 organelle; GO:0043227 membrane-bounded organelle; GO:0043229 intracellular organelle; GO:0043231 intracellular membrane-bounded organelle; GO:0044422 organelle part; GO:0044424 intracellular part; GO:0044434 chloroplast p…	GO:0003824 catalytic activity; GO:0004399 histidinol dehydrogenase activity; GO:0016491 oxidoreductase activity; GO:0016614 oxidoreductase activity, acting on CH-OH group of donors; GO:0016616 oxidoreductase activity, acting on the CH-OH group of donors, NAD or NADP as acceptor;	K00013	hisD; histidinol dehydrogenase [EC:1.1.1.23]	cann00340 Histidine metabolism; cann01100 Metabolic pathways; cann01110 Biosynthesis of secondary metabolites; cann01230 Biosynthesis of amino acids			E	KOG2697	Histidinol dehydrogenase
Capana02g001694	DRKD_DICDI Probable serine/threonine-protein kinase drkD OS=Dictyostelium discoideum GN=drkD PE=2 SV=1	drkD	cytoplasm	GO:0006464 cellular protein modification process; GO:0006468 protein phosphorylation; GO:0006793 phosphorus metabolic process; GO:0006796 phosphate-containing compound metabolic process; GO:0006807 nitrogen compound metabolic process; GO:0007154 cell communication; GO:0007165 signal transduction; GO:0008152 metabolic process; GO:0009987 cellular process; GO:0016310 phosphorylation; GO:0019538 pro…	GO:0005622 intracellular; GO:0005623 cell; GO:0005737 cytoplasm; GO:0044424 intracellular part; GO:0044464 cell part;	GO:0003824 catalytic activity; GO:0004672 protein kinase activity; GO:0016301 kinase activity; GO:0016740 transferase activity; GO:0016772 transferase activity, transferring phosphorus-containing groups; GO:0016773 phosphotransferase activity, alcohol group as acceptor;				PF07714	Protein tyrosine kinase	T	KOG0192	Tyrosine kinase specific for activated (GTP-bound) p21cdc42Hs
Capana02g001753	"PUR4_ARATH Probable phosphoribosylformylglycinamidine synthase, chloroplastic/mitochondrial OS=Arabidopsis thaliana GN=At1g74260 PE=1 SV=2"	At1g74260	chloroplast	GO:0007275 multicellular organism development; GO:0009555 pollen development; GO:0032501 multicellular organismal process; GO:0032502 developmental process; GO:0048229 gametophyte development; GO:0048856 anatomical structure development; GO:0055046 microgametogenesis;	GO:0005622 intracellular; GO:0005623 cell; GO:0005737 cytoplasm; GO:0005739 mitochondrion; GO:0009507 chloroplast; GO:0009532 plastid stroma; GO:0009536 plastid; GO:0009570 chloroplast stroma; GO:0043226 organelle; GO:0043227 membrane-bounded organelle; GO:0043229 intracellular organelle; GO:0043231 intracellular membrane-bounded organelle; GO:0044422 organelle part; GO:0044424 intracellular part…	GO:0000166 nucleotide binding; GO:0003824 catalytic activity; GO:0004642 phosphoribosylformylglycinamidine synthase activity; GO:0005488 binding; GO:0005524 ATP binding; GO:0008144 drug binding; GO:0016874 ligase activity; GO:0016879 ligase activity, forming carbon-nitrogen bonds; GO:0016884 carbon-nitrogen ligase activity, with glutamine as amido-N-donor; GO:0017076 purine nucleotide binding; GO…	K01952	purL, PFAS; phosphoribosylformylglycinamidine synthase [EC:6.3.5.3]	cann00230 Purine metabolism; cann01100 Metabolic pathways; cann01110 Biosynthesis of secondary metabolites	PF02769; PF13507	AIR synthase related protein, C-terminal domain; CobB/CobQ-like glutamine amidotransferase domain	F	KOG1907	Phosphoribosylformylglycinamidine synthase
Capana02g001802	Protein trichome birefringence-like 40	---	vacuolar membrane	GO:0009987 cellular process; GO:0071554 cell wall organization or biogenesis;	GO:0005622 intracellular; GO:0005623 cell; GO:0005737 cytoplasm; GO:0005794 Golgi apparatus; GO:0012505 endomembrane system; GO:0043226 organelle; GO:0043227 membrane-bounded organelle; GO:0043229 intracellular organelle; GO:0043231 intracellular membrane-bounded organelle; GO:0044424 intracellular part; GO:0044444 cytoplasmic part; GO:0044464 cell part;	GO:0003824 catalytic activity; GO:0008374 O-acyltransferase activity; GO:0016407 acetyltransferase activity; GO:0016413 O-acetyltransferase activity; GO:0016740 transferase activity; GO:0016746 transferase activity, transferring acyl groups; GO:0016747 transferase activity, transferring acyl groups other than amino-acyl groups;				PF14416	PMR5 N terminal Domain
Capana02g001833	DSEL_ARATH Phospholipase A1-IIgamma OS=Arabidopsis thaliana GN=DSEL PE=1 SV=1	DSEL	cytoplasm	GO:0006629 lipid metabolic process; GO:0006638 neutral lipid metabolic process; GO:0006639 acylglycerol metabolic process; GO:0008152 metabolic process; GO:0009056 catabolic process; GO:0009987 cellular process; GO:0010029 regulation of seed germination; GO:0010187 negative regulation of seed germination; GO:0010876 lipid localization; GO:0016042 lipid catabolic process; GO:0019915 lipid storage;…	GO:0005622 intracellular; GO:0005623 cell; GO:0005737 cytoplasm; GO:0044424 intracellular part; GO:0044464 cell part;	GO:0003824 catalytic activity; GO:0004620 phospholipase activity; GO:0008970 phosphatidylcholine 1-acylhydrolase activity; GO:0016298 lipase activity; GO:0016787 hydrolase activity; GO:0016788 hydrolase activity, acting on ester bonds; GO:0047372 acylglycerol lipase activity; GO:0052689 carboxylic ester hydrolase activity;						I	KOG4569	Predicted lipase
Capana02g001838	GDL85_ARATH GDSL esterase/lipase At5g45950 OS=Arabidopsis thaliana GN=At5g45950 PE=2 SV=1	At5g45950	vacuolar membrane
Capana02g001858	HAP28_HUMAN 28 kDa heat- and acid-stable phosphoprotein OS=Homo sapiens GN=PDAP1 PE=1 SV=1	PDAP1	nucleus	GO:0000003 reproduction; GO:0000375 RNA splicing, via transesterification reactions; GO:0000377 RNA splicing, via transesterification reactions with bulged adenosine as nucleophile; GO:0000398 mRNA splicing, via spliceosome; GO:0000470 maturation of LSU-rRNA; GO:0000491 small nucleolar ribonucleoprotein complex assembly; GO:0000492 box C/D snoRNP assembly; GO:0001775 cell activation; GO:0002252 i…	GO:0001651 dense fibrillar component; GO:0005576 extracellular region; GO:0005615 extracellular space; GO:0005622 intracellular; GO:0005623 cell; GO:0005634 nucleus; GO:0005654 nucleoplasm; GO:0005681 spliceosomal complex; GO:0005684 U2-type spliceosomal complex; GO:0005690 U4atac snRNP; GO:0005730 nucleolus; GO:0005732 small nucleolar ribonucleoprotein complex; GO:0005737 cytoplasm; GO:0005829 c…	GO:0003676 nucleic acid binding; GO:0003723 RNA binding; GO:0003729 mRNA binding; GO:0005488 binding; GO:0005515 protein binding; GO:0017069 snRNA binding; GO:0019838 growth factor binding; GO:0019899 enzyme binding; GO:0030515 snoRNA binding; GO:0030621 U4 snRNA binding; GO:0030622 U4atac snRNA binding; GO:0034511 U3 snoRNA binding; GO:0034512 box C/D snoRNA binding; GO:0048407 platelet-derived …				PF10252	Casein kinase substrate phosphoprotein PP28	S	KOG3387	60S ribosomal protein 15.5kD/SNU13, NHP2/L7A family (includes ribonuclease P subunit p38), involved in splicing
Capana02g001884	CPSF3_ARATH Cleavage and polyadenylation specificity factor subunit 3-I OS=Arabidopsis thaliana GN=CPSF73-I PE=1 SV=1	CPSF73-I	chloroplast	GO:0006139 nucleobase-containing compound metabolic process; GO:0006396 RNA processing; GO:0006725 cellular aromatic compound metabolic process; GO:0006807 nitrogen compound metabolic process; GO:0008152 metabolic process; GO:0009987 cellular process; GO:0010467 gene expression; GO:0016070 RNA metabolic process; GO:0016073 snRNA metabolic process; GO:0016180 snRNA processing; GO:0034470 ncRNA pro…	GO:0005622 intracellular; GO:0005623 cell; GO:0005634 nucleus; GO:0043226 organelle; GO:0043227 membrane-bounded organelle; GO:0043229 intracellular organelle; GO:0043231 intracellular membrane-bounded organelle; GO:0044424 intracellular part; GO:0044464 cell part;		K14403	CPSF3, YSH1; cleavage and polyadenylation specificity factor subunit 3 [EC:3.1.27.-]	cann03015 mRNA surveillance pathway	PF00753; PF10996; PF11718	Metallo-beta-lactamase superfamily; Beta-Casp domain; Pre-mRNA 3'-end-processing endonuclease polyadenylation factor C-term	A	KOG1137	mRNA cleavage and polyadenylation factor II complex, BRR5 (CPSF subunit)
Capana02g001891	PHS1_DICDI Glycogen phosphorylase 1 OS=Dictyostelium discoideum GN=glpV PE=1 SV=3	glpV	chloroplast	GO:0000272 polysaccharide catabolic process; GO:0005975 carbohydrate metabolic process; GO:0005976 polysaccharide metabolic process; GO:0005977 glycogen metabolic process; GO:0005980 glycogen catabolic process; GO:0006073 cellular glucan metabolic process; GO:0006091 generation of precursor metabolites and energy; GO:0006112 energy reserve metabolic process; GO:0008152 metabolic process; GO:00090…	GO:0005622 intracellular; GO:0005623 cell; GO:0005737 cytoplasm; GO:0044424 intracellular part; GO:0044464 cell part;	GO:0003824 catalytic activity; GO:0004645 phosphorylase activity; GO:0005488 binding; GO:0008144 drug binding; GO:0008184 glycogen phosphorylase activity; GO:0016740 transferase activity; GO:0016757 transferase activity, transferring glycosyl groups; GO:0016758 transferase activity, transferring hexosyl groups; GO:0019842 vitamin binding; GO:0030170 pyridoxal phosphate binding; GO:0036094 small m…	K00688	PYG, glgP; glycogen phosphorylase [EC:2.4.1.1]	cann00500 Starch and sucrose metabolism; cann01100 Metabolic pathways; cann01110 Biosynthesis of secondary metabolites			G	KOG2099	Glycogen phosphorylase
Capana02g001928	"RR5_SPIOL 30S ribosomal protein S5, chloroplastic OS=Spinacia oleracea GN=rps5 PE=1 SV=1"	rps5	cytoplasm	GO:0003002 regionalization; GO:0006139 nucleobase-containing compound metabolic process; GO:0006364 rRNA processing; GO:0006396 RNA processing; GO:0006412 translation; GO:0006518 peptide metabolic process; GO:0006725 cellular aromatic compound metabolic process; GO:0006807 nitrogen compound metabolic process; GO:0006950 response to stress; GO:0006996 organelle organization; GO:0007275 multicellul…	GO:0000313 organellar ribosome; GO:0000314 organellar small ribosomal subunit; GO:0005622 intracellular; GO:0005623 cell; GO:0005634 nucleus; GO:0005737 cytoplasm; GO:0005739 mitochondrion; GO:0005759 mitochondrial matrix; GO:0005761 mitochondrial ribosome; GO:0005763 mitochondrial small ribosomal subunit; GO:0005840 ribosome; GO:0009507 chloroplast; GO:0009532 plastid stroma; GO:0009534 chloropl…	GO:0003735 structural constituent of ribosome; GO:0005198 structural molecule activity;	K02988	RP-S5, MRPS5, rpsE; small subunit ribosomal protein S5	cann03010 Ribosome	PF00333; PF03719	Ribosomal protein S5, N-terminal domain; Ribosomal protein S5, C-terminal domain	J	KOG0877	40S ribosomal protein S2/30S ribosomal protein S5
Capana02g001935	PEXLP_TOBAC Pistil-specific extensin-like protein OS=Nicotiana tabacum PE=2 SV=1	---	extracellular	GO:0001101 response to acid chemical; GO:0009719 response to endogenous stimulus; GO:0009725 response to hormone; GO:0009753 response to jasmonic acid; GO:0010033 response to organic substance; GO:0042221 response to chemical; GO:0048580 regulation of post-embryonic development; GO:0050789 regulation of biological process; GO:0050793 regulation of developmental process; GO:0050896 response to sti…	GO:0005618 cell wall; GO:0005623 cell; GO:0005886 plasma membrane; GO:0005911 cell-cell junction; GO:0009505 plant-type cell wall; GO:0009506 plasmodesma; GO:0016020 membrane; GO:0030054 cell junction; GO:0030312 external encapsulating structure; GO:0044464 cell part; GO:0055044 symplast; GO:0071944 cell periphery;
Capana02g001944	EIF3D_ARATH Eukaryotic translation initiation factor 3 subunit D OS=Arabidopsis thaliana GN=TIF3D1 PE=1 SV=1	TIF3D1	cytoplasm	GO:0006412 translation; GO:0006413 translational initiation; GO:0006464 cellular protein modification process; GO:0006470 protein dephosphorylation; GO:0006518 peptide metabolic process; GO:0006793 phosphorus metabolic process; GO:0006796 phosphate-containing compound metabolic process; GO:0006807 nitrogen compound metabolic process; GO:0006810 transport; GO:0006913 nucleocytoplasmic transport; G…	GO:0005622 intracellular; GO:0005623 cell; GO:0005634 nucleus; GO:0005635 nuclear envelope; GO:0005654 nucleoplasm; GO:0005737 cytoplasm; GO:0005783 endoplasmic reticulum; GO:0005789 endoplasmic reticulum membrane; GO:0005829 cytosol; GO:0005852 eukaryotic translation initiation factor 3 complex; GO:0005911 cell-cell junction; GO:0009506 plasmodesma; GO:0012505 endomembrane system; GO:0016020 mem…	GO:0003676 nucleic acid binding; GO:0003723 RNA binding; GO:0003743 translation initiation factor activity; GO:0003824 catalytic activity; GO:0004721 phosphoprotein phosphatase activity; GO:0004722 protein serine/threonine phosphatase activity; GO:0005488 binding; GO:0008135 translation factor activity, RNA binding; GO:0016787 hydrolase activity; GO:0016788 hydrolase activity, acting on ester bon…	K03251	EIF3D; translation initiation factor 3 subunit D	cann03013 RNA transport			J	KOG2479	Translation initiation factor 3, subunit d (eIF-3d)
Capana02g001973	SF3B2_HUMAN Splicing factor 3B subunit 2 OS=Homo sapiens GN=SF3B2 PE=1 SV=2	SF3B2	nucleus	GO:0000375 RNA splicing, via transesterification reactions; GO:0000377 RNA splicing, via transesterification reactions with bulged adenosine as nucleophile; GO:0000398 mRNA splicing, via spliceosome; GO:0006139 nucleobase-containing compound metabolic process; GO:0006396 RNA processing; GO:0006397 mRNA processing; GO:0006725 cellular aromatic compound metabolic process; GO:0006807 nitrogen compou…	GO:0005622 intracellular; GO:0005623 cell; GO:0005634 nucleus; GO:0005654 nucleoplasm; GO:0005681 spliceosomal complex; GO:0005684 U2-type spliceosomal complex; GO:0005686 U2 snRNP; GO:0005689 U12-type spliceosomal complex; GO:0016604 nuclear body; GO:0016607 nuclear speck; GO:0030532 small nuclear ribonucleoprotein complex; GO:0031974 membrane-enclosed lumen; GO:0031981 nuclear lumen; GO:0032991…		K12829	SF3B2, SAP145, CUS1; splicing factor 3B subunit 2	cann03040 Spliceosome			AV	KOG2330	Splicing factor 3b, subunit 2
Capana02g001978	HYES_HUMAN Epoxide hydrolase 2 OS=Homo sapiens GN=EPHX2 PE=1 SV=2	EPHX2	cytoplasm	GO:0001676 long-chain fatty acid metabolic process; GO:0002532 production of molecular mediator involved in inflammatory response; GO:0002538 arachidonic acid metabolite production involved in inflammatory response; GO:0002539 prostaglandin production involved in inflammatory response; GO:0003008 system process; GO:0003013 circulatory system process; GO:0006082 organic acid metabolic process; GO:…	GO:0005622 intracellular; GO:0005623 cell; GO:0005737 cytoplasm; GO:0005777 peroxisome; GO:0005829 cytosol; GO:0042579 microbody; GO:0043226 organelle; GO:0043227 membrane-bounded organelle; GO:0043229 intracellular organelle; GO:0043231 intracellular membrane-bounded organelle; GO:0044424 intracellular part; GO:0044444 cytoplasmic part; GO:0044464 cell part;	GO:0000287 magnesium ion binding; GO:0003824 catalytic activity; GO:0004301 epoxide hydrolase activity; GO:0005488 binding; GO:0016787 hydrolase activity; GO:0016788 hydrolase activity, acting on ester bonds; GO:0016791 phosphatase activity; GO:0016801 hydrolase activity, acting on ether bonds; GO:0016803 ether hydrolase activity; GO:0042577 lipid phosphatase activity; GO:0042578 phosphoric ester…				PF00561	alpha/beta hydrolase fold	I	KOG4178	Soluble epoxide hydrolase
Capana02g001981	CPL1_ARATH RNA polymerase II C-terminal domain phosphatase-like 1 OS=Arabidopsis thaliana GN=CPL1 PE=1 SV=1	CPL1	nucleus	GO:0001101 response to acid chemical; GO:0006355 regulation of transcription, DNA-templated; GO:0006357 regulation of transcription from RNA polymerase II promoter; GO:0006464 cellular protein modification process; GO:0006470 protein dephosphorylation; GO:0006793 phosphorus metabolic process; GO:0006796 phosphate-containing compound metabolic process; GO:0006807 nitrogen compound metabolic proces…	GO:0000428 DNA-directed RNA polymerase complex; GO:0005622 intracellular; GO:0005623 cell; GO:0005634 nucleus; GO:0005654 nucleoplasm; GO:0016591 DNA-directed RNA polymerase II, holoenzyme; GO:0030880 RNA polymerase complex; GO:0031974 membrane-enclosed lumen; GO:0031981 nuclear lumen; GO:0032991 macromolecular complex; GO:0043226 organelle; GO:0043227 membrane-bounded organelle; GO:0043229 intra…	GO:0003824 catalytic activity; GO:0004647 phosphoserine phosphatase activity; GO:0004721 phosphoprotein phosphatase activity; GO:0004722 protein serine/threonine phosphatase activity; GO:0008420 CTD phosphatase activity; GO:0016787 hydrolase activity; GO:0016788 hydrolase activity, acting on ester bonds; GO:0016791 phosphatase activity; GO:0042578 phosphoric ester hydrolase activity;	K18998	CPL1_2; RNA polymerase II C-terminal domain phosphatase-like 1/2 [EC:3.1.3.16]		PF00035	Double-stranded RNA binding motif	K	KOG0323	TFIIF-interacting CTD phosphatases, including NLI-interacting factor
Capana02g001982	CLC1_ARATH Clathrin light chain 1 OS=Arabidopsis thaliana GN=At2g20760 PE=2 SV=1	At2g20760	nucleus	GO:0006810 transport; GO:0006897 endocytosis; GO:0006898 receptor-mediated endocytosis; GO:0016192 vesicle-mediated transport; GO:0051179 localization; GO:0051234 establishment of localization; GO:0072583 clathrin-dependent endocytosis; GO:0098657 import into cell;	GO:0005622 intracellular; GO:0005623 cell; GO:0005737 cytoplasm; GO:0005829 cytosol; GO:0005886 plasma membrane; GO:0012506 vesicle membrane; GO:0016020 membrane; GO:0030117 membrane coat; GO:0030118 clathrin coat; GO:0030120 vesicle coat; GO:0030125 clathrin vesicle coat; GO:0030135 coated vesicle; GO:0030136 clathrin-coated vesicle; GO:0030659 cytoplasmic vesicle membrane; GO:0030662 coated ves…	GO:0005198 structural molecule activity; GO:0005488 binding; GO:0005515 protein binding; GO:0030276 clathrin binding; GO:0032050 clathrin heavy chain binding;
Capana02g002036	EIF3J_XENLA Eukaryotic translation initiation factor 3 subunit J OS=Xenopus laevis GN=eif3j PE=2 SV=1	eif3j	cytoplasm				K03245	EIF3J; translation initiation factor 3 subunit J	cann03013 RNA transport			J	KOG4813	Translation initiation factor eIF3, p35 subunit
Capana02g002100	"DAG_ANTMA DAG protein, chloroplastic OS=Antirrhinum majus GN=DAG PE=2 SV=1"	DAG	chloroplast	GO:0006139 nucleobase-containing compound metabolic process; GO:0006725 cellular aromatic compound metabolic process; GO:0006807 nitrogen compound metabolic process; GO:0008152 metabolic process; GO:0009451 RNA modification; GO:0009987 cellular process; GO:0016070 RNA metabolic process; GO:0034641 cellular nitrogen compound metabolic process; GO:0043170 macromolecule metabolic process; GO:0043412…	GO:0005622 intracellular; GO:0005623 cell; GO:0005737 cytoplasm; GO:0009507 chloroplast; GO:0009526 plastid envelope; GO:0009532 plastid stroma; GO:0009536 plastid; GO:0009570 chloroplast stroma; GO:0009941 chloroplast envelope; GO:0031967 organelle envelope; GO:0031975 envelope; GO:0043226 organelle; GO:0043227 membrane-bounded organelle; GO:0043229 intracellular organelle; GO:0043231 intracellu…
Capana02g002133	"PSBQ2_ARATH Oxygen-evolving enhancer protein 3-2, chloroplastic OS=Arabidopsis thaliana GN=PSBQ2 PE=1 SV=2"	PSBQ2	chloroplast		GO:0005576 extracellular region; GO:0005622 intracellular; GO:0005623 cell; GO:0005737 cytoplasm; GO:0009507 chloroplast; GO:0009532 plastid stroma; GO:0009534 chloroplast thylakoid; GO:0009535 chloroplast thylakoid membrane; GO:0009536 plastid; GO:0009570 chloroplast stroma; GO:0009579 thylakoid; GO:0016020 membrane; GO:0031976 plastid thylakoid; GO:0031977 thylakoid lumen; GO:0031984 organelle …		K08901	psbQ; photosystem II oxygen-evolving enhancer protein 3	cann00195 Photosynthesis
Capana02g002149	CXXS1_ARATH Thioredoxin-like protein CXXS1 OS=Arabidopsis thaliana GN=CXXS1 PE=2 SV=2	CXXS1	chloroplast	GO:0006950 response to stress; GO:0006979 response to oxidative stress; GO:0008152 metabolic process; GO:0009636 response to toxic substance; GO:0009987 cellular process; GO:0019725 cellular homeostasis; GO:0033554 cellular response to stress; GO:0034599 cellular response to oxidative stress; GO:0042221 response to chemical; GO:0042592 homeostatic process; GO:0045454 cell redox homeostasis; GO:00…	GO:0005622 intracellular; GO:0005623 cell; GO:0005737 cytoplasm; GO:0005829 cytosol; GO:0044424 intracellular part; GO:0044444 cytoplasmic part; GO:0044464 cell part;	GO:0003756 protein disulfide isomerase activity; GO:0003824 catalytic activity; GO:0004791 thioredoxin-disulfide reductase activity; GO:0015035 protein disulfide oxidoreductase activity; GO:0015036 disulfide oxidoreductase activity; GO:0016209 antioxidant activity; GO:0016491 oxidoreductase activity; GO:0016651 oxidoreductase activity, acting on NAD(P)H; GO:0016667 oxidoreductase activity, acting…	K03671	trxA; thioredoxin 1		PF00085	Thioredoxin	O	KOG0907	Thioredoxin
Capana02g002161	PME18_ARATH Pectinesterase/pectinesterase inhibitor 18 OS=Arabidopsis thaliana GN=PME18 PE=1 SV=3	PME18	nucleus	GO:0009605 response to external stimulus; GO:0009607 response to biotic stimulus; GO:0009617 response to bacterium; GO:0043086 negative regulation of catalytic activity; GO:0043207 response to external biotic stimulus; GO:0044092 negative regulation of molecular function; GO:0050790 regulation of catalytic activity; GO:0050896 response to stimulus; GO:0051704 multi-organism process; GO:0051707 re…	GO:0005618 cell wall; GO:0005622 intracellular; GO:0005623 cell; GO:0005737 cytoplasm; GO:0005773 vacuole; GO:0005774 vacuolar membrane; GO:0005829 cytosol; GO:0016020 membrane; GO:0030312 external encapsulating structure; GO:0031090 organelle membrane; GO:0043226 organelle; GO:0043227 membrane-bounded organelle; GO:0043229 intracellular organelle; GO:0043231 intracellular membrane-bounded organe…	GO:0003824 catalytic activity; GO:0004857 enzyme inhibitor activity; GO:0016787 hydrolase activity; GO:0016788 hydrolase activity, acting on ester bonds; GO:0030234 enzyme regulator activity; GO:0030599 pectinesterase activity; GO:0046910 pectinesterase inhibitor activity; GO:0052689 carboxylic ester hydrolase activity; GO:0098772 molecular function regulator;	K01051	E3.1.1.11; pectinesterase [EC:3.1.1.11]	cann00040 Pentose and glucuronate interconversions; cann01100 Metabolic pathways	PF04043	Plant invertase/pectin methylesterase inhibitor
Capana02g002193	"ATPG_TOBAC ATP synthase gamma chain, chloroplastic OS=Nicotiana tabacum GN=ATPC PE=1 SV=1"	ATPC	chloroplast				K02115	ATPF1G, atpG; F-type H+-transporting ATPase subunit gamma	cann00190 Oxidative phosphorylation; cann00195 Photosynthesis; cann01100 Metabolic pathways	PF00231	ATP synthase	C	KOG1531	F0F1-type ATP synthase, gamma subunit
Capana02g002196	"SSY3_SOLTU Soluble starch synthase 3, chloroplastic/amyloplastic OS=Solanum tuberosum GN=SS3 PE=1 SV=1"	SS3	chloroplast	GO:0008152 metabolic process; GO:0009058 biosynthetic process; GO:0009059 macromolecule biosynthetic process; GO:0010021 amylopectin biosynthetic process; GO:0043170 macromolecule metabolic process; GO:0071704 organic substance metabolic process; GO:1901135 carbohydrate derivative metabolic process; GO:1901137 carbohydrate derivative biosynthetic process; GO:1901576 organic substance biosynthetic…		GO:0005488 binding; GO:0005515 protein binding; GO:0042802 identical protein binding;	K00703	glgA; starch synthase [EC:2.4.1.21]	cann00500 Starch and sucrose metabolism; cann01100 Metabolic pathways; cann01110 Biosynthesis of secondary metabolites	PF08323	Starch synthase catalytic domain
Capana02g002206	LGUL_ORYSJ Lactoylglutathione lyase OS=Oryza sativa subsp. japonica GN=GLX-I PE=1 SV=2	GLX-I	chloroplast	GO:0006081 cellular aldehyde metabolic process; GO:0006082 organic acid metabolic process; GO:0006089 lactate metabolic process; GO:0006950 response to stress; GO:0006970 response to osmotic stress; GO:0006979 response to oxidative stress; GO:0008152 metabolic process; GO:0009056 catabolic process; GO:0009438 methylglyoxal metabolic process; GO:0009628 response to abiotic stimulus; GO:0009651 res…	GO:0005622 intracellular; GO:0005623 cell; GO:0005737 cytoplasm; GO:0005773 vacuole; GO:0005777 peroxisome; GO:0005829 cytosol; GO:0005886 plasma membrane; GO:0009507 chloroplast; GO:0009526 plastid envelope; GO:0009536 plastid; GO:0009941 chloroplast envelope; GO:0016020 membrane; GO:0031967 organelle envelope; GO:0031975 envelope; GO:0042579 microbody; GO:0043226 organelle; GO:0043227 membrane-…	GO:0003824 catalytic activity; GO:0004462 lactoylglutathione lyase activity; GO:0005488 binding; GO:0016151 nickel cation binding; GO:0016829 lyase activity; GO:0016846 carbon-sulfur lyase activity; GO:0019863 IgE binding; GO:0019865 immunoglobulin binding; GO:0043167 ion binding; GO:0043169 cation binding; GO:0044877 macromolecular complex binding; GO:0046872 metal ion binding; GO:0046914 transi…	K01759	GLO1, gloA; lactoylglutathione lyase [EC:4.4.1.5]	cann00620 Pyruvate metabolism; cann01100 Metabolic pathways	PF00903	Glyoxalase/Bleomycin resistance protein/Dioxygenase superfamily	G	KOG2943	Predicted glyoxalase
Capana02g002207	"APR3_ARATH 5'-adenylylsulfate reductase 3, chloroplastic OS=Arabidopsis thaliana GN=APR3 PE=2 SV=2"	43924	chloroplast	GO:0000103 sulfate assimilation; GO:0006790 sulfur compound metabolic process; GO:0008152 metabolic process; GO:0009987 cellular process; GO:0019379 sulfate assimilation, phosphoadenylyl sulfate reduction by phosphoadenylyl-sulfate reductase (thioredoxin); GO:0019419 sulfate reduction; GO:0044237 cellular metabolic process; GO:0055114 oxidation-reduction process;	GO:0005622 intracellular; GO:0005623 cell; GO:0005737 cytoplasm; GO:0009507 chloroplast; GO:0009532 plastid stroma; GO:0009536 plastid; GO:0009570 chloroplast stroma; GO:0043226 organelle; GO:0043227 membrane-bounded organelle; GO:0043229 intracellular organelle; GO:0043231 intracellular membrane-bounded organelle; GO:0044422 organelle part; GO:0044424 intracellular part; GO:0044434 chloroplast p…	GO:0003824 catalytic activity; GO:0004604 phosphoadenylyl-sulfate reductase (thioredoxin) activity; GO:0009973 adenylyl-sulfate reductase activity; GO:0016491 oxidoreductase activity; GO:0016667 oxidoreductase activity, acting on a sulfur group of donors; GO:0016671 oxidoreductase activity, acting on a sulfur group of donors, disulfide as acceptor;	K05907	APR; adenylyl-sulfate reductase (glutathione) [EC:1.8.4.9]	cann00920 Sulfur metabolism; cann01100 Metabolic pathways	PF00085	Thioredoxin	EO	KOG0191	Thioredoxin/protein disulfide isomerase
[truncated: 1,523 more rows]

## Sheet: Specific in Proteome
Protein accession	Protein description	Gene name	Subcellular localization	Biological Process	Cellular Component	Molecular Function	KEGG KO No.	KEGG Gene	KEGG pathway	Pfam ID	Domain description	KOG category	KOG NO.	KOG description
[truncated: 4,225 more rows]

## Sheet: Specific in Acetylated Proteome
Protein accession	Protein description	Gene name	Subcellular localization	Biological Process	Cellular Component	Molecular Function	KEGG KO No.	KEGG Gene	KEGG pathway	Pfam ID	Domain description	KOG category	KOG NO.	KOG description
[truncated: 273 more rows]
