# Supplementary material for: Comprehensive Proteome and Lysine Acetylome Analysis Reveals the Widespread Involvement of Acetylation in Cold Resistance of Pepper (Capsicum annuum L.)
Source: Front Plant Sci. 2021 Aug 27;12:730489. doi: 10.3389/fpls.2021.730489 (PMC8429487; doi:10.3389/fpls.2021.730489)
Supplement: Supplementary Table 7 — Motif annotation of acetylated proteins under cold stress. [file Table_7.XLSX]

## Sheet: Sheet1
Table S7. Motif annotation of acetylated proteins under cold stress.
Protein accession	Position	Amino acid	Motif logo
Capana00g003770	141	K	xxxxxxxxxx_K_Sxxxxxxxxx
Capana05g002339	198	K	xxxxxxxxxx_K_Hxxxxxxxxx
Capana09g001460	167	K	xxxxxxxxxx_K_Rxxxxxxxxx
Capana02g003303	266	K	xxxxxxxxHx_K_xxxxxxxxxx
Capana05g002474	7	K	xxxxxxxxxx_K_Kxxxxxxxxx
Capana02g002513	131	K	xxxxxxxxxx_K_Fxxxxxxxxx
Capana03g003804	160	K	xxxxxxxxxx_K_Rxxxxxxxxx
Capana02g002887	458	K	xxxxxxxxxx_K_Sxxxxxxxxx
Capana00g003084	177	K	xxxxxxxxxx_K_Hxxxxxxxxx
Capana06g000675	248	K	xxxxxxxxxx_K_Sxxxxxxxxx
Capana02g002890	169	K	xxxxxxxxxx_K_Fxxxxxxxxx
Capana00g005022	366	K	xxxxxxxxxx_K_Hxxxxxxxxx
Capana00g000900	325	K	xxxxxxxxxx_K_Yxxxxxxxxx
Capana07g002305	422	K	xxxxxxxxxx_K_Sxxxxxxxxx
Capana10g001286	99	K	xxxxxxxxxx_K_Fxxxxxxxxx
Capana12g000350	48	K	xxxxxxxxxH_K_xxxxxxxxxx
Capana03g003612	428	K	xxxxxxxxxx_K_Rxxxxxxxxx
Capana01g002750	209	K	xxxxxxxxxx_K_Rxxxxxxxxx
Capana01g001814	185	K	xxxxxxxxxx_K_Kxxxxxxxxx
Capana08g002213	77	K	xxxxxxxxxx_K_Rxxxxxxxxx
Capana08g002533	110	K	xxxxxxxxxx_K_Nxxxxxxxxx
Capana08g000865	580	K	xxxxxxxxxx_K_xExxxxxxxx
Capana08g002444	338	K	xxxxxxxxxx_K_Nxxxxxxxxx
Capana01g001085	81	K	xxxxxxxxxx_K_Txxxxxxxxx
Capana11g000124	389	K	xxxxxxxxxx_K_xRxxxxxxxx
Capana02g003376	6	K	xxxxxxxxxx_K_Rxxxxxxxxx
Capana07g000319	176	K	xxxxxxxxxx_K_Hxxxxxxxxx
Capana06g002015	229	K	xxxxxxxxxx_K_Yxxxxxxxxx
Capana00g003131	87	K	xxxxxxxxxx_K_Nxxxxxxxxx
Capana01g000550	57	K	xxxxxxxxxx_K_Nxxxxxxxxx
Capana11g000124	279	K	xxxxxxxxxx_K_Txxxxxxxxx
Capana01g000279	178	K	xxxxxxxxxx_K_Rxxxxxxxxx
Capana01g000812	314	K	xxxxxxxxxx_K_Kxxxxxxxxx
Capana00g003078	8	K	xxxxxxxxxx_K_Wxxxxxxxxx
Capana06g000525	309	K	xxxxxxxxxx_K_xExxxxxxxx
Capana11g000253	6	K	xxxxxxxxxx_K_Hxxxxxxxxx
Capana00g004500	10	K	xxxxxxxxxx_K_Dxxxxxxxxx
Capana04g002111	84	K	xxxxxxxxxx_K_Sxxxxxxxxx
Capana00g005036	668	K	xxxxxxxxHx_K_xxxxxxxxxx
Capana03g000843	24	K	xxxxxxxxxx_K_Rxxxxxxxxx
Capana09g002348	198	K	xxxxxxxxHx_K_xxxxxxxxxx
Capana10g000506	47	K	xxxxxxxxxY_K_Nxxxxxxxxx
Capana07g002010	34	K	xxxxxxxxxx_K_xExxxxxxxx
Capana01g000202	7	K	xxxxxxxxxx_K_Yxxxxxxxxx
Capana03g000633	260	K	xxxxxxxxxx_K_Rxxxxxxxxx
Capana09g000825	649	K	xxxxxxxxxx_K_Hxxxxxxxxx
Capana02g000319	547	K	xxxxxxxxxx_K_Yxxxxxxxxx
Capana08g001595	285	K	xxxxxxxxxx_K_KAxxxxxxxx
Capana03g002474	186	K	xxxxxxxxxx_K_Hxxxxxxxxx
Capana05g001398	75	K	xxxxxxxxxT_K_xxxxxxxxxx
Capana01g002398	116	K	xxxxxxxxxx_K_Yxxxxxxxxx
Capana03g002512	60	K	xxxxxxxxxx_K_KAxxxxxxxx
Capana01g002025	186	K	xxxxxxxxxx_K_Nxxxxxxxxx
Capana12g000340	100	K	xxxxxxxxxx_K_Hxxxxxxxxx
Capana02g000024	636	K	xxxxxxxxxx_K_KAxxxxxxxx
Capana05g002462	318	K	xxxxxxxxxx_K_Txxxxxxxxx
Capana00g004910	268	K	xxxxxxxxxx_K_Hxxxxxxxxx
Capana08g002023	65	K	xxxxxxxxxx_K_Yxxxxxxxxx
Capana09g001193	442	K	xxxxxxxxHx_K_xxxxxxxxxx
Capana01g001480	188	K	xxxxxxxxxx_K_Wxxxxxxxxx
Capana09g001315	150	K	xxxxxxxxxx_K_Nxxxxxxxxx
Capana02g002524	340	K	xxxxxxxxxH_K_xxxxxxxxxx
Capana05g002036	545	K	xxxxxxxxxx_K_Rxxxxxxxxx
Capana07g001985	459	K	xxxxxxxxxx_K_Nxxxxxxxxx
Capana03g003711	163	K	xxxxxxxxxx_K_Fxxxxxxxxx
Capana11g002212	885	K	xxxxxxxxxx_K_Kxxxxxxxxx
Capana01g000509	414	K	xxxxxxxxxx_K_Hxxxxxxxxx
Capana08g002681	263	K	xxxxxxxxxx_K_Txxxxxxxxx
Capana04g000327	258	K	xxxxxxxxxx_K_KAxxxxxxxx
Capana06g001234	116	K	xxxxxxxxxx_K_Nxxxxxxxxx
Capana04g000962	132	K	xxxxxxxxxx_K_Hxxxxxxxxx
Capana10g000527	368	K	xxxxxxxxxx_K_Rxxxxxxxxx
Capana01g004297	316	K	xxxxxxxxxx_K_Sxxxxxxxxx
Capana12g002820	19	K	xxxxxxxxxx_K_Sxxxxxxxxx
Capana03g000613	101	K	xxxxxxxxxx_K_Rxxxxxxxxx
Capana02g000833	435	K	xxxxxxxxxx_K_Nxxxxxxxxx
Capana08g000983	147	K	xxxxxxxxxx_K_Sxxxxxxxxx
Capana07g002128	96	K	xxxxxxxxxx_K_Wxxxxxxxxx
Capana06g002561	52	K	xxxxxxxxxx_K_Txxxxxxxxx
Capana01g001179	148	K	xxxxxxxxxx_K_Yxxxxxxxxx
Capana01g003169	189	K	xxxxxxxxxx_K_Nxxxxxxxxx
Capana07g001803	484	K	xxxxxxxxxx_K_Sxxxxxxxxx
Capana10g000802	114	K	xxxxxxxxxY_K_Nxxxxxxxxx
Capana03g001373	46	K	xxxxxxxxxx_K_Yxxxxxxxxx
Capana12g000408	30	K	xxxxxxxxxx_K_Dxxxxxxxxx
Capana01g001805	237	K	xxxxxxxxxx_K_Nxxxxxxxxx
Capana01g000335	26	K	xxxxxxxxxx_K_Rxxxxxxxxx
Capana08g000985	56	K	xxxxxxxxxx_K_Rxxxxxxxxx
Capana00g003129	149	K	xxxxxxxxxx_K_Wxxxxxxxxx
Capana01g001333	467	K	xxxxxxxxxx_K_Yxxxxxxxxx
Capana05g000740	305	K	xxxxxxxxxx_K_Txxxxxxxxx
Capana00g004062	81	K	xxxxxxxxxY_K_xxxxxxxxxx
Capana06g001728	287	K	xxxxxxxxxx_K_Yxxxxxxxxx
Capana03g000287	35	K	xxxxxxxxxx_K_Sxxxxxxxxx
Capana08g000545	306	K	xxxxxxxxxx_K_Sxxxxxxxxx
Capana12g001716	49	K	xxxxxxxxxx_K_Sxxxxxxxxx
Capana03g003700	49	K	xxxxxxxxxx_K_Dxxxxxxxxx
Capana11g000472	1268	K	xxxxxxxxxx_K_Nxxxxxxxxx
Capana09g002348	233	K	xxxxxxxxxx_K_Txxxxxxxxx
Capana01g003292	53	K	xxxxxxxxxx_K_KIxxxxxxxx
Capana06g000378	456	K	xxxxxxxxxx_K_Wxxxxxxxxx
Capana10g001612	4	K	xxxxxxxxxx_K_Txxxxxxxxx
Capana06g000730	122	K	xxxxxxxxxx_K_Rxxxxxxxxx
Capana12g001156	230	K	xxxxxxxxxx_K_Yxxxxxxxxx
Capana05g001385	56	K	xxxxxxxxxx_K_Sxxxxxxxxx
Capana08g000956	355	K	xxxxxxxxxx_K_Nxxxxxxxxx
Capana02g003696	148	K	xxxxxxxxxx_K_Yxxxxxxxxx
Capana00g001388	80	K	xxxxxxxxxx_K_Fxxxxxxxxx
Capana02g003509	393	K	xxxxxxxxxT_K_xxxxxxxxxx
Capana03g000806	167	K	xxxxxxxxxx_K_Sxxxxxxxxx
Capana12g001220	25	K	xxxxxxxxxx_K_Yxxxxxxxxx
Capana02g000031	390	K	xxxxxxxxxx_K_xExxxxxxxx
Capana07g002419	38	K	xxxxxxxxxx_K_Rxxxxxxxxx
Capana11g001953	218	K	xxxxxxxxxx_K_Hxxxxxxxxx
Capana01g002599	157	K	xxxxxxxxxH_K_xxxxxxxxxx
Capana00g001764	44	K	xxxxxxxxxx_K_xExxxxxxxx
Capana04g002829	129	K	xxxxxxxxxx_K_Sxxxxxxxxx
Capana08g000323	124	K	xxxxxxxxxx_K_Fxxxxxxxxx
Capana02g002621	340	K	xxxxxxxxxx_K_Txxxxxxxxx
Capana08g002643	72	K	xxxxxxxxxx_K_Rxxxxxxxxx
Capana00g001213	107	K	xxxxxxxxxx_K_Wxxxxxxxxx
Capana12g000163	631	K	xxxxxxxxxx_K_Yxxxxxxxxx
Capana01g001119	194	K	xxxxxxxxxx_K_Rxxxxxxxxx
Capana07g000818	268	K	xxxxxxxxxx_K_Txxxxxxxxx
Capana00g000559	148	K	xxxxxxxxxx_K_Hxxxxxxxxx
Capana11g000380	166	K	xxxxxxxxxx_K_Yxxxxxxxxx
Capana12g002751	58	K	xxxxxxxxxx_K_Nxxxxxxxxx
Capana00g000453	101	K	xxxxxxxxxT_K_xxxxxxxxxx
Capana02g003637	95	K	xxxxxxxxxx_K_Rxxxxxxxxx
Capana09g000159	139	K	xxxxxxxxxx_K_Kxxxxxxxxx
Capana06g000608	201	K	xxxxxxxxxx_K_Sxxxxxxxxx
Capana08g002729	28	K	xxxxxxxxxx_K_Nxxxxxxxxx
Capana00g002796	40	K	xxxxxxxxxx_K_Sxxxxxxxxx
Capana00g004704	102	K	xxxxxxxxxx_K_Hxxxxxxxxx
Capana05g001984	85	K	xxxxxxxxxx_K_Sxxxxxxxxx
Capana02g002845	57	K	xxxxxxxxxx_K_Hxxxxxxxxx
Capana05g000554	604	K	xxxxxxxxxx_K_Sxxxxxxxxx
Capana08g001807	25	K	xxxxxxxxxx_K_Sxxxxxxxxx
Capana06g000258	30	K	xxxxxxxxxx_K_Hxxxxxxxxx
Capana01g003391	22	K	xxxxxxxxxx_K_Txxxxxxxxx
Capana07g000611	111	K	xxxxxxxxxY_K_xxxxxxxxxx
Capana08g001060	304	K	xxxxxxxxxx_K_Fxxxxxxxxx
Capana00g004955	80	K	xxxxxxxxxx_K_KIxxxxxxxx
Capana09g000141	138	K	xxxxxxxxxx_K_Hxxxxxxxxx
Capana08g002396	832	K	xxxxxxxxxx_K_Nxxxxxxxxx
Capana03g000601	61	K	xxxxxxxxxx_K_Sxxxxxxxxx
Capana12g002820	247	K	xxxxxxxxxx_K_Nxxxxxxxxx
Capana03g001695	100	K	xxxxxxxxxx_K_Dxxxxxxxxx
Capana03g001128	153	K	xxxxxxxxxx_K_Fxxxxxxxxx
Capana08g000827	238	K	xxxxxxxxxx_K_Yxxxxxxxxx
Capana07g001398	148	K	xxxxxxxxxx_K_Sxxxxxxxxx
Capana00g004955	59	K	xxxxxxxxxx_K_Yxxxxxxxxx
Capana03g002596	75	K	xxxxxxxxHx_K_xxxxxxxxxx
Capana07g002457	129	K	xxxxxxxxxx_K_Nxxxxxxxxx
Capana02g001150	255	K	xxxxxxxxxx_K_Yxxxxxxxxx
Capana06g001714	164	K	xxxxxxxxxx_K_Fxxxxxxxxx
Capana05g000572	72	K	xxxxxxxxxH_K_xxxxxxxxxx
Capana05g000346	70	K	xxxxxxxxxx_K_Kxxxxxxxxx
Capana02g002246	487	K	xxxxxxxxxx_K_Nxxxxxxxxx
Capana04g000290	25	K	xxxxxxxxHx_K_xxxxxxxxxx
Capana10g001092	123	K	xxxxxxxxxx_K_Fxxxxxxxxx
Capana03g000054	506	K	xxxxxxxxxx_K_Txxxxxxxxx
Capana05g001224	1203	K	xxxxxxxxxx_K_Sxxxxxxxxx
Capana00g004374	339	K	xxxxxxxxxx_K_Rxxxxxxxxx
Capana01g000289	39	K	xxxxxxxxxx_K_Sxxxxxxxxx
Capana03g001022	406	K	xxxxxxxxxx_K_Txxxxxxxxx
Capana11g001072	112	K	xxxxxxxxxx_K_Rxxxxxxxxx
Capana08g000039	423	K	xxxxxxxxxY_K_xxxxxxxxxx
Capana10g001701	328	K	xxxxxxxxxx_K_Fxxxxxxxxx
Capana03g000743	472	K	xxxxxxxxxx_K_KAxxxxxxxx
Capana11g002197	50	K	xxxxxxxxxx_K_Fxxxxxxxxx
Capana01g000205	597	K	xxxxxxxxxx_K_Rxxxxxxxxx
Capana03g000354	238	K	xxxxxxxxxx_K_Fxxxxxxxxx
Capana02g000490	124	K	xxxxxxxxHx_K_xxxxxxxxxx
Capana08g000846	14	K	xxxxxxxxxx_K_Fxxxxxxxxx
Capana02g000489	348	K	xxxxxxxxxx_K_Kxxxxxxxxx
Capana12g002616	107	K	xxxxxxxxxx_K_Fxxxxxxxxx
Capana01g002299	73	K	xxxxxxxxxx_K_Yxxxxxxxxx
Capana04g000971	129	K	xxxxxxxxxx_K_Sxxxxxxxxx
Capana05g001769	67	K	xxxxxxxxxx_K_Sxxxxxxxxx
Capana11g001958	117	K	xxxxxxxxxx_K_KAxxxxxxxx
Capana01g003759	39	K	xxxxxxxxxx_K_Hxxxxxxxxx
Capana01g001578	258	K	xxxxxxxxxx_K_Rxxxxxxxxx
Capana03g003707	1275	K	xxxxxxxxxx_K_Kxxxxxxxxx
Capana08g001136	63	K	xxxxxxxxxT_K_xxxxxxxxxx
Capana06g002957	90	K	xxxxxxxxxx_K_Yxxxxxxxxx
Capana03g000471	423	K	xxxxxxxxxx_K_xRxxxxxxxx
Capana00g004800	90	K	xxxxxxxxxx_K_Sxxxxxxxxx
Capana09g000217	328	K	xxxxxxxxxx_K_Sxxxxxxxxx
Capana08g002681	81	K	xxxxxxxxxx_K_Dxxxxxxxxx
Capana01g003296	52	K	xxxxxxxxxx_K_KIxxxxxxxx
Capana07g000032	784	K	xxxxxxxxxx_K_Hxxxxxxxxx
Capana10g000802	176	K	xxxxxxxxxx_K_Sxxxxxxxxx
Capana03g000942	42	K	xxxxxxxxxT_K_xxxxxxxxxx
Capana03g001851	165	K	xxxxxxxxHx_K_xxxxxxxxxx
Capana12g000455	208	K	xxxxxxxxxx_K_Sxxxxxxxxx
Capana03g001381	174	K	xxxxxxxxxx_K_Dxxxxxxxxx
Capana05g002226	16	K	xxxxxxxxxx_K_Fxxxxxxxxx
Capana01g004056	89	K	xxxxxxxxxx_K_Txxxxxxxxx
Capana01g000509	181	K	xxxxxxxxxx_K_Dxxxxxxxxx
Capana02g001884	673	K	xxxxxxxxxx_K_xRxxxxxxxx
Capana12g002408	13	K	xxxxxxxxxx_K_Kxxxxxxxxx
Capana08g000806	667	K	xxxxxxxxxx_K_Sxxxxxxxxx
Capana06g001561	155	K	xxxxxxxxxx_K_Fxxxxxxxxx
Capana07g002267	15	K	xxxxxxxxxx_K_xExxxxxxxx
Capana06g000721	105	K	xxxxxxxxxx_K_Rxxxxxxxxx
Capana08g000545	268	K	xxxxxxxxxx_K_Rxxxxxxxxx
Capana04g001619	17	K	xxxxxxxxxx_K_Yxxxxxxxxx
Capana07g002429	405	K	xxxxxxxxxx_K_xExxxxxxxx
Capana11g000010	6	K	xxxxxxxxxx_K_Wxxxxxxxxx
Capana02g003269	298	K	xxxxxxxxxx_K_xRxxxxxxxx
Capana07g000351	699	K	xxxxxxxxxx_K_Yxxxxxxxxx
Capana01g002678	160	K	xxxxxxxxxx_K_Yxxxxxxxxx
Capana09g002348	137	K	xxxxxxxxxx_K_Hxxxxxxxxx
Capana01g000177	382	K	xxxxxxxxxx_K_Sxxxxxxxxx
Capana01g000753	453	K	xxxxxxxxxx_K_Fxxxxxxxxx
Capana01g002948	202	K	xxxxxxxxxx_K_Fxxxxxxxxx
Capana06g000100	656	K	xxxxxxxxxx_K_Wxxxxxxxxx
Capana08g001321	122	K	xxxxxxxxxx_K_Sxxxxxxxxx
Capana01g004493	157	K	xxxxxxxxxY_K_xxxxxxxxxx
Capana04g001494	41	K	xxxxxxxxxx_K_Rxxxxxxxxx
Capana04g002806	114	K	xxxxxxxxxx_K_Hxxxxxxxxx
Capana05g000387	35	K	xxxxxxxxxx_K_Rxxxxxxxxx
Capana02g003489	360	K	xxxxxxxxxx_K_xExxxxxxxx
Capana04g000100	122	K	xxxxxxxxxH_K_xxxxxxxxxx
Capana08g000412	210	K	xxxxxxxxxx_K_Rxxxxxxxxx
Capana03g004435	67	K	xxxxxxxxxx_K_Rxxxxxxxxx
Capana02g002196	548	K	xxxxxxxxxx_K_Txxxxxxxxx
Capana04g002132	442	K	xxxxxxxxxY_K_xxxxxxxxxx
Capana01g002147	206	K	xxxxxxxxxx_K_Txxxxxxxxx
Capana03g001207	47	K	xxxxxxxxxx_K_Yxxxxxxxxx
Capana01g003049	355	K	xxxxxxxxxx_K_Hxxxxxxxxx
Capana03g000964	221	K	xxxxxxxxxx_K_Hxxxxxxxxx
Capana08g002745	136	K	xxxxxxxxxx_K_Nxxxxxxxxx
Capana08g002643	14	K	xxxxxxxxxx_K_Hxxxxxxxxx
Capana01g002934	374	K	xxxxxxxxxT_K_xxxxxxxxxx
Capana03g000388	404	K	xxxxxxxxxx_K_Nxxxxxxxxx
Capana06g001719	39	K	xxxxxxxxxx_K_Wxxxxxxxxx
Capana02g001624	138	K	xxxxxxxxxx_K_Rxxxxxxxxx
Capana02g002133	204	K	xxxxxxxxxx_K_Txxxxxxxxx
Capana01g002187	122	K	xxxxxxxxxx_K_Sxxxxxxxxx
Capana00g002799	41	K	xxxxxxxAxx_K_Pxxxxxxxxx
Capana05g000346	4	K	xxxxxxxxxx_K_Fxxxxxxxxx
Capana09g002235	1251	K	xxxxxxxxxx_K_Txxxxxxxxx
Capana10g002247	444	K	xxxxxxxxxx_K_Hxxxxxxxxx
Capana01g002007	156	K	xxxxxxxxxx_K_Sxxxxxxxxx
Capana06g000726	333	K	xxxxxxxxxx_K_Dxxxxxxxxx
Capana05g002020	245	K	xxxxxxxxxx_K_Wxxxxxxxxx
Capana05g000818	44	K	xxxxxxxxxx_K_Yxxxxxxxxx
Capana06g001468	183	K	xxxxxxxxxx_K_Nxxxxxxxxx
Capana03g004607	185	K	xxxxxxxxxx_K_Hxxxxxxxxx
Capana03g000843	95	K	xxxxxxxxxx_K_Sxxxxxxxxx
Capana04g001331	212	K	xxxxxxxxxx_K_Yxxxxxxxxx
Capana01g001119	178	K	xxxxxxxxxx_K_Fxxxxxxxxx
Capana05g000123	287	K	xxxxxxxxxY_K_xxxxxxxxxx
Capana02g003315	655	K	xxxxxxxxxx_K_Rxxxxxxxxx
Capana02g003365	636	K	xxxxxxxxxx_K_xRxxxxxxxx
Capana00g004936	241	K	xxxxxxxxxx_K_Fxxxxxxxxx
Capana06g002415	86	K	xxxxxxxxxx_K_Fxxxxxxxxx
Capana11g001411	282	K	xxxxxxxxxx_K_Hxxxxxxxxx
Capana03g004318	468	K	xxxxxxxxxx_K_Sxxxxxxxxx
Capana07g002011	91	K	xxxxxxxxxx_K_Rxxxxxxxxx
Capana11g000681	485	K	xxxxxxxxxx_K_Nxxxxxxxxx
Capana08g000343	653	K	xxxxxxxxxx_K_Hxxxxxxxxx
Capana11g000124	12	K	xxxxxxxxxx_K_Nxxxxxxxxx
Capana10g001080	109	K	xxxxxxxxxx_K_Dxxxxxxxxx
Capana02g002385	225	K	xxxxxxxxxx_K_Wxxxxxxxxx
Capana08g000209	164	K	xxxxxxxxxY_K_xxxxxxxxxx
Capana07g001436	85	K	xxxxxxxxxx_K_Sxxxxxxxxx
Capana01g002398	68	K	xxxxxxxxxx_K_Wxxxxxxxxx
Capana07g000713	21	K	xxxxxxxxxH_K_xxxxxxxxxx
Capana00g000900	139	K	xxxxxxxxxx_K_Dxxxxxxxxx
Capana00g003055	176	K	xxxxxxxxxx_K_KAxxxxxxxx
Capana01g002678	144	K	xxxxxxxxxx_K_Fxxxxxxxxx
Capana12g002247	86	K	xxxxxxxxxx_K_Hxxxxxxxxx
Capana04g001829	118	K	xxxxxxxxHx_K_xxxxxxxxxx
Capana12g000479	268	K	xxxxxxxxxx_K_Rxxxxxxxxx
Capana03g002552	571	K	xxxxxxxxxx_K_Hxxxxxxxxx
Capana12g000479	910	K	xxxxxxxxxx_K_Fxxxxxxxxx
Capana02g002768	370	K	xxxxxxxxxx_K_Nxxxxxxxxx
Capana03g001353	345	K	xxxxxxxxxx_K_Rxxxxxxxxx
Capana02g000667	76	K	xxxxxxxxxx_K_Wxxxxxxxxx
Capana06g000944	24	K	xxxxxxxxxH_K_xxxxxxxxxx
Capana12g001272	245	K	xxxxxxxxxx_K_Hxxxxxxxxx
Capana03g000178	134	K	xxxxxxxxxx_K_Yxxxxxxxxx
Capana05g000665	18	K	xxxxxxxxxx_K_Yxxxxxxxxx
Capana09g001378	189	K	xxxxxxxxxx_K_Kxxxxxxxxx
Capana09g000691	28	K	xxxxxxxxxx_K_Nxxxxxxxxx
Capana03g000611	81	K	xxxxxxxxxx_K_Kxxxxxxxxx
Capana12g002758	58	K	xxxxxxxxxx_K_Nxxxxxxxxx
Capana08g001598	41	K	xxxxxxxxxx_K_Dxxxxxxxxx
Capana06g000734	157	K	xxxxxxxxHx_K_xxxxxxxxxx
Capana04g000110	280	K	xxxxxxxxxx_K_Yxxxxxxxxx
Capana01g003296	210	K	xxxxxxxxxx_K_Fxxxxxxxxx
Capana08g001631	134	K	xxxxxxxxxx_K_Fxxxxxxxxx
Capana10g000456	486	K	xxxxxxxxxx_K_Rxxxxxxxxx
Capana03g001127	881	K	xxxxxxxxxx_K_Fxxxxxxxxx
Capana01g003544	403	K	xxxxxxxxxx_K_Rxxxxxxxxx
Capana03g003222	290	K	xxxxxxxxxx_K_Sxxxxxxxxx
Capana06g001622	38	K	xxxxxxxxxx_K_Sxxxxxxxxx
Capana03g003513	266	K	xxxxxxxxxx_K_Kxxxxxxxxx
Capana06g000453	25	K	xxxxxxxxxx_K_Rxxxxxxxxx
Capana05g002495	94	K	xxxxxxxxxx_K_Hxxxxxxxxx
Capana02g003365	367	K	xxxxxxxxxx_K_Nxxxxxxxxx
Capana04g002416	223	K	xxxxxxxxxx_K_Rxxxxxxxxx
Capana03g003831	119	K	xxxxxxxxxx_K_Hxxxxxxxxx
Capana01g000239	348	K	xxxxxxxxxx_K_Yxxxxxxxxx
Capana11g000242	37	K	xxxxxxxxxx_K_Kxxxxxxxxx
Capana03g000579	251	K	xxxxxxxxxx_K_Fxxxxxxxxx
Capana03g003217	22	K	xxxxxxxxxx_K_Sxxxxxxxxx
Capana03g004441	74	K	xxxxxxxxxx_K_Nxxxxxxxxx
Capana08g001653	25	K	xxxxxxxxxx_K_Sxxxxxxxxx
Capana03g004441	79	K	xxxxxxxxxx_K_Yxxxxxxxxx
Capana00g003367	87	K	xxxxxxxxxx_K_Kxxxxxxxxx
Capana09g001597	131	K	xxxxxxxxxx_K_xRxxxxxxxx
Capana01g003044	70	K	xxxxxxxxxx_K_Dxxxxxxxxx
Capana08g000323	121	K	xxxxxxxxxx_K_Fxxxxxxxxx
Capana03g002309	126	K	xxxxxxxxxx_K_Yxxxxxxxxx
Capana03g004399	240	K	xxxxxxxxxx_K_Nxxxxxxxxx
Capana03g001110	74	K	xxxxxxxxxx_K_Txxxxxxxxx
Capana08g001495	56	K	xxxxxxxxxx_K_Wxxxxxxxxx
Capana09g001363	892	K	xxxxxxxxxY_K_xxxxxxxxxx
Capana08g001259	218	K	xxxxxxxxxx_K_xRxxxxxxxx
Capana03g000947	252	K	xxxxxxxxxx_K_Yxxxxxxxxx
Capana08g002744	61	K	xxxxxxxxxx_K_Fxxxxxxxxx
Capana05g000075	246	K	xxxxxxxxxx_K_Rxxxxxxxxx
Capana09g001946	12	K	xxxxxxxxxx_K_Rxxxxxxxxx
Capana01g000975	679	K	xxxxxxxxxx_K_Yxxxxxxxxx
Capana09g001761	51	K	xxxxxxxxxx_K_KIxxxxxxxx
Capana01g000243	318	K	xxxxxxxxxx_K_Txxxxxxxxx
Capana01g003544	480	K	xxxxxxxxxT_K_xxxxxxxxxx
Capana03g003141	32	K	xxxxxxxxxx_K_Rxxxxxxxxx
Capana02g002036	183	K	xxxxxxxxxx_K_Sxxxxxxxxx
Capana06g002374	126	K	xxxxxxxxxx_K_Kxxxxxxxxx
Capana11g001542	232	K	xxxxxxxxxx_K_Yxxxxxxxxx
Capana01g002908	471	K	xxxxxxxxxx_K_Yxxxxxxxxx
Capana04g000781	357	K	xxxxxxxxxx_K_Sxxxxxxxxx
Capana11g000044	528	K	xxxxxxxxxx_K_Txxxxxxxxx
Capana07g000032	928	K	xxxxxxxxxx_K_Kxxxxxxxxx
Capana08g002745	69	K	xxxxxxxxxx_K_Txxxxxxxxx
Capana03g000726	295	K	xxxxxxxxxx_K_Nxxxxxxxxx
Capana02g003310	307	K	xxxxxxxxxx_K_Sxxxxxxxxx
Capana08g000598	250	K	xxxxxxxxxx_K_Rxxxxxxxxx
Capana03g002218	103	K	xxxxxxxxxx_K_Sxxxxxxxxx
Capana12g000479	161	K	xxxxxxxxxx_K_Txxxxxxxxx
Capana09g001518	722	K	xxxxxxxxxx_K_Wxxxxxxxxx
Capana03g000136	493	K	xxxxxxxxxx_K_Yxxxxxxxxx
Capana09g000248	118	K	xxxxxxxxxx_K_KIxxxxxxxx
Capana11g000087	74	K	xxxxxxxxxx_K_Yxxxxxxxxx
Capana06g002939	37	K	xxxxxxxxxx_K_Sxxxxxxxxx
Capana00g005036	184	K	xxxxxxxxxx_K_Dxxxxxxxxx
Capana01g000243	436	K	xxxxxxxxxx_K_Rxxxxxxxxx
Capana03g003135	177	K	xxxxxxxxxx_K_Yxxxxxxxxx
Capana07g000326	352	K	xxxxxxxxxx_K_Hxxxxxxxxx
Capana02g002577	136	K	xxxxxxxAxx_K_Pxxxxxxxxx
Capana12g001789	28	K	xxxxxxxxxY_K_xxxxxxxxxx
Capana12g000538	90	K	xxxxxxxxxx_K_Fxxxxxxxxx
Capana07g001845	176	K	xxxxxxxxxx_K_Hxxxxxxxxx
Capana03g000208	54	K	xxxxxxxxxx_K_Kxxxxxxxxx
Capana04g001609	178	K	xxxxxxxxxx_K_Rxxxxxxxxx
Capana02g001753	1133	K	xxxxxxxxxx_K_Yxxxxxxxxx
Capana02g002100	66	K	xxxxxxxxxx_K_Rxxxxxxxxx
Capana07g000220	92	K	xxxxxxxxxH_K_xxxxxxxxxx
Capana09g000655	219	K	xxxxxxxxxx_K_Fxxxxxxxxx
Capana05g002227	70	K	xxxxxxxxxx_K_Rxxxxxxxxx
Capana06g002561	30	K	xxxxxxxxxx_K_Nxxxxxxxxx
Capana03g001133	351	K	xxxxxxxxxx_K_Rxxxxxxxxx
Capana03g000743	352	K	xxxxxxxxxx_K_xRxxxxxxxx
Capana02g001130	103	K	xxxxxxxxxx_K_Yxxxxxxxxx
Capana02g001944	431	K	xxxxxxxxxx_K_Nxxxxxxxxx
Capana12g000720	262	K	xxxxxxxxxY_K_xxxxxxxxxx
Capana09g001946	621	K	xxxxxxxxxx_K_Rxxxxxxxxx
Capana02g001982	186	K	xxxxxxxxxx_K_Fxxxxxxxxx
Capana03g001821	214	K	xxxxxxxxxx_K_Txxxxxxxxx
Capana00g000900	327	K	xxxxxxxxxx_K_Sxxxxxxxxx
Capana02g003376	450	K	xxxxxxxxxx_K_Txxxxxxxxx
Capana06g000357	59	K	xxxxxxxxxx_K_Dxxxxxxxxx
Capana06g000240	227	K	xxxxxxxxxx_K_Kxxxxxxxxx
Capana00g003783	19	K	xxxxxxxxxx_K_Fxxxxxxxxx
Capana12g001992	94	K	xxxxxxxxxx_K_Fxxxxxxxxx
Capana06g001234	227	K	xxxxxxxxxx_K_Kxxxxxxxxx
Capana12g000150	300	K	xxxxxxxxxT_K_xxxxxxxxxx
Capana06g001826	19	K	xxxxxxxxxx_K_Rxxxxxxxxx
Capana03g004268	414	K	xxxxxxxxxx_K_Sxxxxxxxxx
Capana01g003621	329	K	xxxxxxxxxx_K_KIxxxxxxxx
Capana06g000548	176	K	xxxxxxxxxx_K_Kxxxxxxxxx
Capana12g000340	107	K	xxxxxxxxxT_K_xxxxxxxxxx
Capana01g000497	62	K	xxxxxxxxxx_K_Dxxxxxxxxx
Capana03g000964	387	K	xxxxxxxxxx_K_Yxxxxxxxxx
Capana04g000041	90	K	xxxxxxxxxx_K_Rxxxxxxxxx
Capana12g000406	368	K	xxxxxxxxxx_K_Hxxxxxxxxx
Capana09g000128	18	K	xxxxxxxxxx_K_Txxxxxxxxx
Capana09g002062	323	K	xxxxxxxxxx_K_Yxxxxxxxxx
Capana01g000243	207	K	xxxxxxxxxx_K_Sxxxxxxxxx
Capana03g000306	170	K	xxxxxxxxxx_K_xRxxxxxxxx
Capana01g002678	120	K	xxxxxxxxxx_K_xRxxxxxxxx
Capana11g000141	177	K	xxxxxxxxxx_K_Nxxxxxxxxx
Capana05g002079	69	K	xxxxxxxxxx_K_Hxxxxxxxxx
Capana09g001761	98	K	xxxxxxxxxx_K_Fxxxxxxxxx
Capana12g001420	317	K	xxxxxxxxxx_K_Rxxxxxxxxx
Capana01g001700	374	K	xxxxxxxxxx_K_Wxxxxxxxxx
Capana03g000947	185	K	xxxxxxxxxx_K_Hxxxxxxxxx
Capana06g000653	148	K	xxxxxxxxxx_K_Wxxxxxxxxx
Capana01g001574	211	K	xxxxxxxxxx_K_Sxxxxxxxxx
Capana06g002575	243	K	xxxxxxxxxY_K_xxxxxxxxxx
Capana00g004062	182	K	xxxxxxxxxx_K_xExxxxxxxx
Capana02g001146	118	K	xxxxxxxxxx_K_Yxxxxxxxxx
Capana02g002996	743	K	xxxxxxxxxx_K_Hxxxxxxxxx
Capana00g005022	44	K	xxxxxxxxxY_K_xxxxxxxxxx
Capana08g002116	42	K	xxxxxxxxxx_K_Nxxxxxxxxx
Capana08g001422	91	K	xxxxxxxxxx_K_Fxxxxxxxxx
Capana09g002309	201	K	xxxxxxxxxx_K_Hxxxxxxxxx
Capana11g001281	173	K	xxxxxxxxHx_K_xxxxxxxxxx
Capana04g002068	210	K	xxxxxxxxxx_K_Nxxxxxxxxx
Capana00g003675	837	K	xxxxxxxxxx_K_Yxxxxxxxxx
Capana05g002405	77	K	xxxxxxxxxx_K_Yxxxxxxxxx
Capana05g000093	349	K	xxxxxxxxxx_K_Hxxxxxxxxx
Capana08g001688	231	K	xxxxxxxxxx_K_Yxxxxxxxxx
Capana07g001146	10	K	xxxxxxxxxx_K_xRxxxxxxxx
Capana08g002396	362	K	xxxxxxxxxx_K_Yxxxxxxxxx
Capana02g002219	163	K	xxxxxxxxxx_K_Fxxxxxxxxx
Capana08g001861	444	K	xxxxxxxxxY_K_xxxxxxxxxx
Capana08g001818	193	K	xxxxxxxxxx_K_Fxxxxxxxxx
Capana11g000039	125	K	xxxxxxxxxx_K_Txxxxxxxxx
Capana03g002199	67	K	xxxxxxxxxx_K_Sxxxxxxxxx
Capana05g000123	926	K	xxxxxxxxxx_K_Hxxxxxxxxx
Capana08g000430	110	K	xxxxxxxxxx_K_KAxxxxxxxx
Capana11g001367	251	K	xxxxxxxxxT_K_xxxxxxxxxx
Capana12g002755	3	K	xxxxxxxxxx_K_Sxxxxxxxxx
Capana02g003498	132	K	xxxxxxxxxx_K_Nxxxxxxxxx
Capana01g001997	127	K	xxxxxxxxxx_K_Kxxxxxxxxx
Capana10g002358	170	K	xxxxxxxxxx_K_Hxxxxxxxxx
Capana04g000059	139	K	xxxxxxxxxx_K_xExxxxxxxx
Capana04g001114	185	K	xxxxxxxxxx_K_Yxxxxxxxxx
Capana02g002522	804	K	xxxxxxxxxx_K_Yxxxxxxxxx
Capana01g003225	222	K	xxxxxxxxxx_K_Fxxxxxxxxx
Capana10g001751	162	K	xxxxxxxxxx_K_Nxxxxxxxxx
Capana07g000611	200	K	xxxxxxxxxx_K_Hxxxxxxxxx
Capana03g000743	460	K	xxxxxxxxxx_K_Sxxxxxxxxx
Capana04g002698	499	K	xxxxxxxxxx_K_Kxxxxxxxxx
Capana10g001361	171	K	xxxxxxxxxY_K_Nxxxxxxxxx
Capana08g001186	153	K	xxxxxxxxxx_K_Fxxxxxxxxx
Capana04g000274	1133	K	xxxxxxxxxx_K_Txxxxxxxxx
Capana03g000624	113	K	xxxxxxxxxx_K_Dxxxxxxxxx
Capana12g002825	263	K	xxxxxxxxxx_K_Yxxxxxxxxx
Capana10g000190	393	K	xxxxxxxxxx_K_KAxxxxxxxx
Capana03g003831	151	K	xxxxxxxxxx_K_Nxxxxxxxxx
Capana12g000083	50	K	xxxxxxxxxx_K_Fxxxxxxxxx
Capana08g000873	128	K	xxxxxxxxxx_K_Rxxxxxxxxx
Capana04g002867	254	K	xxxxxxxxxx_K_Wxxxxxxxxx
Capana09g000706	6	K	xxxxxxxxxx_K_Txxxxxxxxx
Capana01g001226	51	K	xxxxxxxxxx_K_Sxxxxxxxxx
Capana11g002133	669	K	xxxxxxxxxx_K_Fxxxxxxxxx
Capana09g001785	360	K	xxxxxxxxxx_K_Wxxxxxxxxx
Capana02g002577	79	K	xxxxxxxxxx_K_Fxxxxxxxxx
Capana07g001488	37	K	xxxxxxxxxx_K_Txxxxxxxxx
Capana04g001731	941	K	xxxxxxxxxT_K_xxxxxxxxxx
Capana03g001145	88	K	xxxxxxxxxx_K_Hxxxxxxxxx
Capana06g001071	124	K	xxxxxxxxxY_K_xxxxxxxxxx
Capana07g000319	234	K	xxxxxxxxxx_K_Fxxxxxxxxx
Capana09g000353	124	K	xxxxxxxxxY_K_Nxxxxxxxxx
Capana01g003259	109	K	xxxxxxxxxx_K_Kxxxxxxxxx
Capana07g002011	52	K	xxxxxxxxxx_K_KIxxxxxxxx
Capana01g000505	168	K	xxxxxxxxxx_K_Hxxxxxxxxx
Capana12g002123	123	K	xxxxxxxxxx_K_KAxxxxxxxx
Capana00g002110	55	K	xxxxxxxxxx_K_Wxxxxxxxxx
Capana05g000802	33	K	xxxxxxxxxx_K_Sxxxxxxxxx
Capana03g002848	25	K	xxxxxxxxxx_K_Kxxxxxxxxx
Capana03g003804	280	K	xxxxxxxxxx_K_Nxxxxxxxxx
Capana03g000190	146	K	xxxxxxxxxx_K_Dxxxxxxxxx
Capana08g002012	219	K	xxxxxxxxxx_K_xExxxxxxxx
Capana07g001515	281	K	xxxxxxxxxx_K_Yxxxxxxxxx
Capana03g000593	377	K	xxxxxxxxxx_K_Nxxxxxxxxx
Capana07g000909	344	K	xxxxxxxxxx_K_Yxxxxxxxxx
Capana06g002508	153	K	xxxxxxxxxx_K_Sxxxxxxxxx
Capana06g000214	442	K	xxxxxxxxxx_K_Kxxxxxxxxx
Capana09g001680	68	K	xxxxxxxxxY_K_xxxxxxxxxx
Capana12g002501	247	K	xxxxxxxxxx_K_Sxxxxxxxxx
Capana12g001353	428	K	xxxxxxxxxx_K_Hxxxxxxxxx
Capana07g000051	199	K	xxxxxxxxxx_K_Dxxxxxxxxx
Capana01g000078	383	K	xxxxxxxxxx_K_Dxxxxxxxxx
Capana08g001266	206	K	xxxxxxxxHx_K_xxxxxxxxxx
Capana04g001619	191	K	xxxxxxxxxx_K_Kxxxxxxxxx
Capana04g000900	224	K	xxxxxxxxxx_K_Rxxxxxxxxx
Capana09g001928	207	K	xxxxxxxxxx_K_Rxxxxxxxxx
Capana04g002867	146	K	xxxxxxxxxx_K_xRxxxxxxxx
Capana06g000258	62	K	xxxxxxxxxx_K_Rxxxxxxxxx
Capana01g002586	114	K	xxxxxxxxxx_K_xRxxxxxxxx
Capana04g000847	267	K	xxxxxxxxxx_K_Nxxxxxxxxx
Capana01g003725	110	K	xxxxxxxxxx_K_Sxxxxxxxxx
Capana08g002001	114	K	xxxxxxxxxx_K_Yxxxxxxxxx
Capana10g000473	517	K	xxxxxxxxxx_K_Yxxxxxxxxx
Capana10g002144	60	K	xxxxxxxxxx_K_Rxxxxxxxxx
Capana08g001246	230	K	xxxxxxxxxx_K_Fxxxxxxxxx
Capana07g001441	747	K	xxxxxxxxxx_K_Txxxxxxxxx
Capana09g001701	52	K	xxxxxxxxxY_K_Nxxxxxxxxx
Capana03g000552	461	K	xxxxxxxxxx_K_Nxxxxxxxxx
Capana01g000177	275	K	xxxxxxxxxx_K_Fxxxxxxxxx
Capana04g000110	140	K	xxxxxxxxxx_K_Kxxxxxxxxx
Capana10g000741	87	K	xxxxxxxxxx_K_Fxxxxxxxxx
Capana03g001549	127	K	xxxxxxxxxx_K_Nxxxxxxxxx
Capana12g002101	57	K	xxxxxxxxxY_K_xxxxxxxxxx
Capana01g000505	358	K	xxxxxxxxxx_K_Nxxxxxxxxx
Capana04g000333	220	K	xxxxxxxxxx_K_Sxxxxxxxxx
Capana02g001384	58	K	xxxxxxxxxx_K_Nxxxxxxxxx
Capana01g001363	171	K	xxxxxxxxxx_K_Sxxxxxxxxx
Capana11g001958	106	K	xxxxxxxxxx_K_Hxxxxxxxxx
Capana06g002949	82	K	xxxxxxxxxx_K_Rxxxxxxxxx
Capana08g000349	153	K	xxxxxxxxxx_K_Dxxxxxxxxx
Capana08g000798	382	K	xxxxxxxxxx_K_Sxxxxxxxxx
Capana07g001803	486	K	xxxxxxxxxx_K_Sxxxxxxxxx
Capana09g000207	222	K	xxxxxxxxxx_K_Fxxxxxxxxx
Capana01g003039	129	K	xxxxxxxxxT_K_xxxxxxxxxx
Capana00g003268	92	K	xxxxxxxxxT_K_xxxxxxxxxx
Capana08g002514	389	K	xxxxxxxxxx_K_Nxxxxxxxxx
Capana12g000131	474	K	xxxxxxxxxx_K_Nxxxxxxxxx
Capana02g001322	17	K	xxxxxxxxxx_K_Fxxxxxxxxx
Capana10g001856	177	K	xxxxxxxxxY_K_Nxxxxxxxxx
Capana12g000116	45	K	xxxxxxxxxx_K_Txxxxxxxxx
Capana09g000715	188	K	xxxxxxxxxx_K_Yxxxxxxxxx
Capana01g003736	264	K	xxxxxxxxxx_K_Nxxxxxxxxx
Capana03g000905	185	K	xxxxxxxxxx_K_Fxxxxxxxxx
Capana09g001761	109	K	xxxxxxxxxx_K_Sxxxxxxxxx
Capana03g003888	100	K	xxxxxxxxxx_K_Rxxxxxxxxx
Capana04g000331	156	K	xxxxxxxxxx_K_Txxxxxxxxx
Capana00g001712	479	K	xxxxxxxxxx_K_Sxxxxxxxxx
Capana07g002419	14	K	xxxxxxxxxx_K_Nxxxxxxxxx
Capana10g000065	343	K	xxxxxxxxxx_K_Rxxxxxxxxx
Capana10g000456	299	K	xxxxxxxxxx_K_Fxxxxxxxxx
Capana03g000778	105	K	xxxxxxxxxx_K_Rxxxxxxxxx
Capana04g000138	83	K	xxxxxxxxxx_K_KAxxxxxxxx
Capana05g002401	168	K	xxxxxxxxHx_K_xxxxxxxxxx
Capana06g000896	282	K	xxxxxxxxxx_K_Hxxxxxxxxx
Capana05g000396	262	K	xxxxxxxxHx_K_xxxxxxxxxx
Capana00g003105	101	K	xxxxxxxxxx_K_xExxxxxxxx
Capana10g000104	167	K	xxxxxxxxxx_K_Dxxxxxxxxx
Capana08g001533	119	K	xxxxxxxxxx_K_Fxxxxxxxxx
Capana08g001826	149	K	xxxxxxxxxY_K_Nxxxxxxxxx
Capana12g000184	290	K	xxxxxxxxxx_K_xExxxxxxxx
Capana03g002045	45	K	xxxxxxxxxx_K_Fxxxxxxxxx
Capana10g000581	206	K	xxxxxxxxxx_K_Rxxxxxxxxx
Capana08g002759	467	K	xxxxxxxxxx_K_Txxxxxxxxx
Capana07g000381	535	K	xxxxxxxxxx_K_Wxxxxxxxxx
Capana04g001331	25	K	xxxxxxxxxx_K_Hxxxxxxxxx
Capana02g002887	159	K	xxxxxxxxxx_K_KIxxxxxxxx
Capana11g001474	278	K	xxxxxxxxxx_K_Nxxxxxxxxx
Capana10g001955	354	K	xxxxxxxxHx_K_xxxxxxxxxx
Capana12g001287	964	K	xxxxxxxxxx_K_Sxxxxxxxxx
Capana06g002575	318	K	xxxxxxxxxx_K_Dxxxxxxxxx
Capana10g002253	315	K	xxxxxxxxxx_K_Hxxxxxxxxx
Capana10g001624	112	K	xxxxxxxxxT_K_xxxxxxxxxx
Capana11g000212	174	K	xxxxxxxxxx_K_KIxxxxxxxx
Capana12g000745	138	K	xxxxxxxxxx_K_Nxxxxxxxxx
Capana02g003115	231	K	xxxxxxxxxx_K_Hxxxxxxxxx
Capana02g003203	103	K	xxxxxxxxxx_K_Txxxxxxxxx
Capana04g001288	6	K	xxxxxxxxxx_K_Hxxxxxxxxx
Capana10g000051	153	K	xxxxxxxxxx_K_xRxxxxxxxx
Capana08g002514	260	K	xxxxxxxxxx_K_Rxxxxxxxxx
Capana03g004100	244	K	xxxxxxxxxx_K_Sxxxxxxxxx
Capana10g000333	88	K	xxxxxxxxxx_K_Nxxxxxxxxx
Capana01g003589	308	K	xxxxxxxxxx_K_Nxxxxxxxxx
Capana04g000333	237	K	xxxxxxxxxx_K_Sxxxxxxxxx
Capana08g001818	363	K	xxxxxxxxxx_K_Fxxxxxxxxx
Capana04g001731	336	K	xxxxxxxxxx_K_KIxxxxxxxx
Capana03g000109	325	K	xxxxxxxxxY_K_xxxxxxxxxx
Capana12g000008	85	K	xxxxxxxxxx_K_Nxxxxxxxxx
Capana12g000207	130	K	xxxxxxxxxT_K_xxxxxxxxxx
Capana00g004313	500	K	xxxxxxxxxx_K_Fxxxxxxxxx
Capana02g002554	304	K	xxxxxxxxxx_K_xExxxxxxxx
Capana07g002178	435	K	xxxxxxxxxx_K_Hxxxxxxxxx
Capana06g001506	435	K	xxxxxxxxxx_K_Hxxxxxxxxx
Capana01g002957	83	K	xxxxxxxxxY_K_xxxxxxxxxx
Capana08g002188	254	K	xxxxxxxxHx_K_xxxxxxxxxx
Capana08g001897	158	K	xxxxxxxxxx_K_Nxxxxxxxxx
Capana09g000353	177	K	xxxxxxxxxx_K_Sxxxxxxxxx
Capana06g000351	40	K	xxxxxxxxxH_K_xxxxxxxxxx
Capana01g001226	322	K	xxxxxxxxxx_K_Kxxxxxxxxx
Capana11g000699	32	K	xxxxxxxxxT_K_xxxxxxxxxx
Capana04g000489	144	K	xxxxxxxxxx_K_Txxxxxxxxx
Capana07g000069	122	K	xxxxxxxxxx_K_Hxxxxxxxxx
Capana03g002899	21	K	xxxxxxxxxx_K_Dxxxxxxxxx
Capana03g001974	124	K	xxxxxxxxxx_K_Txxxxxxxxx
Capana08g001047	186	K	xxxxxxxxxx_K_Kxxxxxxxxx
Capana12g001019	325	K	xxxxxxxxxx_K_Wxxxxxxxxx
Capana09g000153	45	K	xxxxxxxxxx_K_Dxxxxxxxxx
Capana04g000195	235	K	xxxxxxxxxx_K_Hxxxxxxxxx
Capana00g003058	185	K	xxxxxxxxxx_K_KIxxxxxxxx
Capana01g000530	337	K	xxxxxxxxxx_K_Kxxxxxxxxx
Capana03g001608	182	K	xxxxxxxxxx_K_Dxxxxxxxxx
Capana10g001199	313	K	xxxxxxxxxx_K_Kxxxxxxxxx
Capana09g000212	21	K	xxxxxxxxxx_K_Hxxxxxxxxx
Capana02g002196	1033	K	xxxxxxxxxx_K_Sxxxxxxxxx
Capana09g001858	51	K	xxxxxxxxxx_K_Kxxxxxxxxx
Capana08g001375	63	K	xxxxxxxxxx_K_Nxxxxxxxxx
Capana07g001733	128	K	xxxxxxxxxY_K_xxxxxxxxxx
Capana06g000553	9	K	xxxxxxxxxx_K_Kxxxxxxxxx
Capana06g000728	184	K	xxxxxxxxxx_K_Sxxxxxxxxx
Capana02g002621	55	K	xxxxxxxxxx_K_Txxxxxxxxx
Capana11g002027	245	K	xxxxxxxxxx_K_Sxxxxxxxxx
Capana08g000430	433	K	xxxxxxxxxx_K_Dxxxxxxxxx
Capana03g000813	21	K	xxxxxxxxxx_K_Kxxxxxxxxx
Capana08g000663	205	K	xxxxxxxxxx_K_Yxxxxxxxxx
Capana04g000491	229	K	xxxxxxxxxY_K_xxxxxxxxxx
Capana07g000107	55	K	xxxxxxxxxx_K_Fxxxxxxxxx
Capana09g002309	88	K	xxxxxxxxxx_K_Txxxxxxxxx
Capana03g001821	210	K	xxxxxxxxxx_K_Fxxxxxxxxx
Capana04g000166	181	K	xxxxxxxxxx_K_Wxxxxxxxxx
Capana08g000292	188	K	xxxxxxxxxx_K_Nxxxxxxxxx
Capana03g003255	135	K	xxxxxxxxxY_K_Nxxxxxxxxx
Capana08g002729	50	K	xxxxxxxxxx_K_Txxxxxxxxx
Capana03g003317	13	K	xxxxxxxxxx_K_Txxxxxxxxx
Capana08g001965	361	K	xxxxxxxxxx_K_Fxxxxxxxxx
Capana11g000814	269	K	xxxxxxxxxx_K_Kxxxxxxxxx
Capana12g000290	397	K	xxxxxxxxxx_K_Fxxxxxxxxx
Capana10g000098	132	K	xxxxxxxxxx_K_Sxxxxxxxxx
Capana08g002618	94	K	xxxxxxxxxx_K_Yxxxxxxxxx
Capana06g002690	344	K	xxxxxxxxxx_K_xExxxxxxxx
Capana08g001259	169	K	xxxxxxxxxx_K_Fxxxxxxxxx
Capana02g002577	164	K	xxxxxxxxxx_K_Rxxxxxxxxx
Capana05g000746	160	K	xxxxxxxxxx_K_Txxxxxxxxx
Capana01g000823	302	K	xxxxxxxxxx_K_Dxxxxxxxxx
Capana03g001816	281	K	xxxxxxxxxx_K_Wxxxxxxxxx
Capana08g001920	374	K	xxxxxxxxxx_K_KIxxxxxxxx
Capana02g002219	153	K	xxxxxxxxxx_K_Dxxxxxxxxx
Capana03g000654	521	K	xxxxxxxxxx_K_Sxxxxxxxxx
Capana02g000024	622	K	xxxxxxxxxx_K_Txxxxxxxxx
Capana06g001732	94	K	xxxxxxxxxx_K_Fxxxxxxxxx
Capana06g001705	149	K	xxxxxxxxxx_K_Fxxxxxxxxx
Capana12g001335	96	K	xxxxxxxxxx_K_Kxxxxxxxxx
Capana07g000075	41	K	xxxxxxxxxx_K_Dxxxxxxxxx
Capana01g000174	67	K	xxxxxxxxxx_K_Sxxxxxxxxx
Capana02g000298	423	K	xxxxxxxxxx_K_Fxxxxxxxxx
Capana05g000414	108	K	xxxxxxxxxx_K_Sxxxxxxxxx
Capana08g000542	3	K	xxxxxxxxxx_K_Fxxxxxxxxx
Capana01g000523	258	K	xxxxxxxxxx_K_Yxxxxxxxxx
Capana06g001062	442	K	xxxxxxxxxx_K_Rxxxxxxxxx
Capana09g000125	200	K	xxxxxxxxxx_K_Hxxxxxxxxx
Capana03g004398	564	K	xxxxxxxxxx_K_Kxxxxxxxxx
Capana09g001643	243	K	xxxxxxxxxx_K_Yxxxxxxxxx
Capana12g001353	469	K	xxxxxxxxHx_K_xxxxxxxxxx
Capana11g001904	316	K	xxxxxxxxHx_K_xxxxxxxxxx
Capana01g000250	5	K	xxxxxxxxxx_K_xExxxxxxxx
Capana02g003173	129	K	xxxxxxxxxx_K_Yxxxxxxxxx
Capana12g002638	131	K	xxxxxxxxxY_K_xxxxxxxxxx
Capana03g001262	244	K	xxxxxxxxHx_K_xxxxxxxxxx
Capana08g001687	625	K	xxxxxxxxxx_K_Nxxxxxxxxx
Capana03g003513	202	K	xxxxxxxxxx_K_xRxxxxxxxx
Capana12g001477	112	K	xxxxxxxxxx_K_Sxxxxxxxxx
Capana09g001602	210	K	xxxxxxxxHx_K_xxxxxxxxxx
Capana02g003100	54	K	xxxxxxxxxx_K_Hxxxxxxxxx
Capana08g000545	3	K	xxxxxxxxxx_K_Fxxxxxxxxx
Capana04g001650	215	K	xxxxxxxxxx_K_Txxxxxxxxx
Capana09g002427	400	K	xxxxxxxxxx_K_KIxxxxxxxx
Capana01g000056	634	K	xxxxxxxxxx_K_Yxxxxxxxxx
Capana10g001389	151	K	xxxxxxxxxx_K_Nxxxxxxxxx
Capana12g002102	77	K	xxxxxxxxxx_K_Fxxxxxxxxx
Capana02g003315	831	K	xxxxxxxxxx_K_xRxxxxxxxx
Capana10g000134	215	K	xxxxxxxxxx_K_Dxxxxxxxxx
Capana02g001944	510	K	xxxxxxxxxx_K_Yxxxxxxxxx
Capana01g002433	61	K	xxxxxxxxxx_K_Txxxxxxxxx
Capana02g000862	178	K	xxxxxxxxxx_K_Yxxxxxxxxx
Capana08g000415	80	K	xxxxxxxxxx_K_Sxxxxxxxxx
Capana00g005036	948	K	xxxxxxxxxx_K_Sxxxxxxxxx
Capana01g003349	674	K	xxxxxxxxxx_K_xExxxxxxxx
Capana12g000537	456	K	xxxxxxxxxx_K_Wxxxxxxxxx
Capana02g002161	518	K	xxxxxxxxxT_K_xxxxxxxxxx
Capana03g001381	84	K	xxxxxxxxxx_K_Hxxxxxxxxx
Capana06g002889	60	K	xxxxxxxxxx_K_Fxxxxxxxxx
Capana03g000964	286	K	xxxxxxxxxx_K_KIxxxxxxxx
Capana10g001955	132	K	xxxxxxxxxx_K_Yxxxxxxxxx
Capana12g000150	348	K	xxxxxxxxxx_K_Fxxxxxxxxx
Capana04g001829	77	K	xxxxxxxxxx_K_Nxxxxxxxxx
Capana03g004399	256	K	xxxxxxxxxx_K_KIxxxxxxxx
Capana10g002128	93	K	xxxxxxxxxx_K_Sxxxxxxxxx
Capana10g001912	66	K	xxxxxxxxxx_K_Nxxxxxxxxx
Capana06g002618	66	K	xxxxxxxxxx_K_Sxxxxxxxxx
Capana01g001519	140	K	xxxxxxxxxx_K_Wxxxxxxxxx
Capana12g001691	385	K	xxxxxxxxxx_K_Sxxxxxxxxx
Capana07g001064	117	K	xxxxxxxxxx_K_Yxxxxxxxxx
Capana01g000290	101	K	xxxxxxxxxx_K_Nxxxxxxxxx
Capana04g000349	477	K	xxxxxxxxxx_K_Fxxxxxxxxx
Capana09g000199	424	K	xxxxxxxxxx_K_Sxxxxxxxxx
Capana02g002513	428	K	xxxxxxxxxx_K_Fxxxxxxxxx
Capana03g001705	126	K	xxxxxxxxxT_K_xxxxxxxxxx
Capana08g000154	340	K	xxxxxxxxxx_K_Rxxxxxxxxx
Capana07g002456	127	K	xxxxxxxxxx_K_Hxxxxxxxxx
Capana02g002219	375	K	xxxxxxxxxH_K_xxxxxxxxxx
Capana00g003506	351	K	xxxxxxxxxx_K_Yxxxxxxxxx
Capana00g001764	132	K	xxxxxxxxxx_K_Yxxxxxxxxx
Capana07g001239	565	K	xxxxxxxxHx_K_xxxxxxxxxx
Capana03g002188	122	K	xxxxxxxxxT_K_xxxxxxxxxx
Capana06g002615	486	K	xxxxxxxxxx_K_Dxxxxxxxxx
Capana04g000340	274	K	xxxxxxxxxx_K_Rxxxxxxxxx
Capana01g000156	113	K	xxxxxxxxxY_K_xxxxxxxxxx
Capana01g002806	572	K	xxxxxxxxxx_K_Kxxxxxxxxx
Capana07g000220	25	K	xxxxxxxxxx_K_Kxxxxxxxxx
Capana06g000748	192	K	xxxxxxxxHx_K_xxxxxxxxxx
Capana03g003447	128	K	xxxxxxxxxx_K_Rxxxxxxxxx
Capana04g001289	19	K	xxxxxxxxxx_K_xExxxxxxxx
Capana05g000871	133	K	xxxxxxxxxx_K_Hxxxxxxxxx
Capana02g001352	506	K	xxxxxxxxxx_K_Nxxxxxxxxx
Capana08g002393	158	K	xxxxxxxxxx_K_Yxxxxxxxxx
Capana02g001384	107	K	xxxxxxxxxx_K_Yxxxxxxxxx
Capana07g000220	367	K	xxxxxxxxxx_K_Rxxxxxxxxx
Capana07g000191	211	K	xxxxxxxxxx_K_Kxxxxxxxxx
Capana04g001765	1229	K	xxxxxxxxxx_K_Hxxxxxxxxx
Capana01g003224	416	K	xxxxxxxxxx_K_KAxxxxxxxx
Capana12g001353	307	K	xxxxxxxxxx_K_Nxxxxxxxxx
Capana08g001293	224	K	xxxxxxxxxx_K_Yxxxxxxxxx
Capana02g002093	179	K	xxxxxxxxxx_K_Kxxxxxxxxx
Capana08g002008	54	K	xxxxxxxxxx_K_Sxxxxxxxxx
Capana07g000191	196	K	xxxxxxxxxx_K_Rxxxxxxxxx
Capana03g001366	442	K	xxxxxxxxxx_K_Hxxxxxxxxx
Capana06g001559	84	K	xxxxxxxxxx_K_Rxxxxxxxxx
Capana04g000100	205	K	xxxxxxxxxx_K_Txxxxxxxxx
Capana08g002854	136	K	xxxxxxxxxx_K_Nxxxxxxxxx
Capana10g000224	288	K	xxxxxxxxxx_K_Sxxxxxxxxx
Capana12g002671	226	K	xxxxxxxxxx_K_Kxxxxxxxxx
Capana03g001821	182	K	xxxxxxxxxx_K_Fxxxxxxxxx
Capana07g001299	84	K	xxxxxxxxxx_K_Sxxxxxxxxx
Capana10g002167	145	K	xxxxxxxxxx_K_Yxxxxxxxxx
Capana03g000599	696	K	xxxxxxxxxx_K_Rxxxxxxxxx
Capana07g002410	602	K	xxxxxxxxxx_K_Kxxxxxxxxx
Capana12g000536	42	K	xxxxxxxxxx_K_Wxxxxxxxxx
Capana01g003385	449	K	xxxxxxxxxx_K_Rxxxxxxxxx
Capana02g003039	147	K	xxxxxxxxxx_K_Sxxxxxxxxx
Capana06g000586	419	K	xxxxxxxxxx_K_Hxxxxxxxxx
Capana03g000267	516	K	xxxxxxxxxx_K_Rxxxxxxxxx
Capana08g001899	60	K	xxxxxxxxxx_K_xRxxxxxxxx
Capana05g002198	151	K	xxxxxxxxxx_K_Hxxxxxxxxx
Capana10g001312	128	K	xxxxxxxxxx_K_Rxxxxxxxxx
Capana00g002800	41	K	xxxxxxxAxx_K_Pxxxxxxxxx
Capana06g000726	87	K	xxxxxxxxxx_K_Hxxxxxxxxx
Capana08g001818	304	K	xxxxxxxxxx_K_Rxxxxxxxxx
Capana01g002957	201	K	xxxxxxxxxx_K_Fxxxxxxxxx
Capana07g000951	36	K	xxxxxxxxxY_K_xxxxxxxxxx
Capana08g001733	173	K	xxxxxxxxxx_K_Txxxxxxxxx
Capana04g001659	642	K	xxxxxxxxxx_K_Yxxxxxxxxx
Capana01g002939	51	K	xxxxxxxxxx_K_Fxxxxxxxxx
Capana11g000039	477	K	xxxxxxxxxx_K_xExxxxxxxx
Capana07g001239	562	K	xxxxxxxxxx_K_Hxxxxxxxxx
Capana02g001265	98	K	xxxxxxxxxx_K_Yxxxxxxxxx
Capana08g000763	91	K	xxxxxxxxxx_K_Sxxxxxxxxx
Capana10g000802	166	K	xxxxxxxxxY_K_Nxxxxxxxxx
Capana12g000408	36	K	xxxxxxxxxx_K_Hxxxxxxxxx
Capana12g002616	153	K	xxxxxxxxxx_K_Fxxxxxxxxx
Capana03g000535	628	K	xxxxxxxxHx_K_xxxxxxxxxx
Capana12g000455	108	K	xxxxxxxxxx_K_KIxxxxxxxx
Capana12g002517	83	K	xxxxxxxxxx_K_Yxxxxxxxxx
Capana04g002873	239	K	xxxxxxxxHx_K_xxxxxxxxxx
Capana08g002146	108	K	xxxxxxxxxx_K_xExxxxxxxx
Capana01g001121	288	K	xxxxxxxxxx_K_Hxxxxxxxxx
Capana12g002662	157	K	xxxxxxxxxx_K_Sxxxxxxxxx
Capana04g001288	54	K	xxxxxxxxxx_K_Hxxxxxxxxx
Capana09g000141	225	K	xxxxxxxxxx_K_Yxxxxxxxxx
Capana00g002729	484	K	xxxxxxxxxx_K_Yxxxxxxxxx
Capana07g002178	429	K	xxxxxxxxxx_K_Hxxxxxxxxx
Capana00g001453	89	K	xxxxxxxxxx_K_Kxxxxxxxxx
Capana08g001333	61	K	xxxxxxxxxx_K_Yxxxxxxxxx
Capana02g002576	14	K	xxxxxxxxxx_K_Fxxxxxxxxx
Capana09g000710	69	K	xxxxxxxxxx_K_Hxxxxxxxxx
Capana00g002925	404	K	xxxxxxxxxx_K_Nxxxxxxxxx
Capana03g000964	278	K	xxxxxxxxxx_K_Hxxxxxxxxx
Capana12g000874	4	K	xxxxxxxxxx_K_Sxxxxxxxxx
Capana06g001007	145	K	xxxxxxxxxx_K_Sxxxxxxxxx
Capana11g001282	27	K	xxxxxxxxxx_K_Kxxxxxxxxx
Capana00g001454	102	K	xxxxxxxxxx_K_Yxxxxxxxxx
Capana04g000349	433	K	xxxxxxxxxx_K_Wxxxxxxxxx
Capana12g000479	467	K	xxxxxxxxxH_K_xxxxxxxxxx
Capana12g002648	190	K	xxxxxxxxxY_K_xxxxxxxxxx
Capana12g000287	4	K	xxxxxxxxxT_K_xxxxxxxxxx
Capana10g000007	463	K	xxxxxxxxxx_K_Yxxxxxxxxx
Capana02g000764	273	K	xxxxxxxxxx_K_Nxxxxxxxxx
Capana01g002411	221	K	xxxxxxxxxx_K_Yxxxxxxxxx
Capana02g001981	902	K	xxxxxxxxxx_K_Sxxxxxxxxx
Capana00g003656	87	K	xxxxxxxxxx_K_Yxxxxxxxxx
Capana10g000740	258	K	xxxxxxxxxx_K_Wxxxxxxxxx
Capana11g000953	216	K	xxxxxxxxHx_K_xxxxxxxxxx
Capana07g000107	34	K	xxxxxxxxxx_K_Yxxxxxxxxx
Capana03g000601	264	K	xxxxxxxxxx_K_Rxxxxxxxxx
Capana00g003566	137	K	xxxxxxxxxT_K_xxxxxxxxxx
Capana03g000613	82	K	xxxxxxxxxx_K_Txxxxxxxxx
Capana12g001176	116	K	xxxxxxxxxx_K_Fxxxxxxxxx
Capana07g002419	244	K	xxxxxxxxxx_K_Txxxxxxxxx
Capana10g000473	722	K	xxxxxxxxxx_K_Yxxxxxxxxx
Capana05g002511	69	K	xxxxxxxxxx_K_Sxxxxxxxxx
Capana12g000555	91	K	xxxxxxxxxx_K_Nxxxxxxxxx
Capana05g002198	298	K	xxxxxxxxxx_K_Yxxxxxxxxx
Capana05g002550	167	K	xxxxxxxxxx_K_Yxxxxxxxxx
Capana06g002294	69	K	xxxxxxxxxx_K_Hxxxxxxxxx
Capana01g000293	57	K	xxxxxxxxxx_K_Rxxxxxxxxx
Capana01g003049	338	K	xxxxxxxxxH_K_xxxxxxxxxx
Capana05g002050	187	K	xxxxxxxxxY_K_Nxxxxxxxxx
Capana02g003324	239	K	xxxxxxxxxx_K_Sxxxxxxxxx
Capana07g002139	173	K	xxxxxxxxxx_K_Rxxxxxxxxx
Capana07g002457	50	K	xxxxxxxxxx_K_Yxxxxxxxxx
Capana04g001765	133	K	xxxxxxxxxx_K_Kxxxxxxxxx
Capana12g001532	193	K	xxxxxxxxxx_K_Txxxxxxxxx
Capana01g000643	169	K	xxxxxxxxxx_K_Sxxxxxxxxx
Capana08g002432	263	K	xxxxxxxxxx_K_Sxxxxxxxxx
Capana09g001445	199	K	xxxxxxxxxY_K_xxxxxxxxxx
Capana09g001602	541	K	xxxxxxxxxx_K_Nxxxxxxxxx
Capana08g000942	137	K	xxxxxxxxxY_K_xxxxxxxxxx
Capana05g000038	139	K	xxxxxxxxxx_K_Yxxxxxxxxx
Capana06g000748	91	K	xxxxxxxxxx_K_Nxxxxxxxxx
Capana01g000509	309	K	xxxxxxxxxx_K_Dxxxxxxxxx
Capana09g002021	84	K	xxxxxxxxxx_K_Yxxxxxxxxx
Capana06g000351	66	K	xxxxxxxxxx_K_Txxxxxxxxx
Capana08g001258	100	K	xxxxxxxxxx_K_Fxxxxxxxxx
Capana05g000396	620	K	xxxxxxxxxx_K_Sxxxxxxxxx
Capana08g000002	57	K	xxxxxxxxxx_K_Nxxxxxxxxx
Capana08g000936	177	K	xxxxxxxxxx_K_Wxxxxxxxxx
Capana00g003007	392	K	xxxxxxxxxx_K_Hxxxxxxxxx
Capana02g000067	390	K	xxxxxxxxxx_K_Fxxxxxxxxx
Capana04g000040	45	K	xxxxxxxxxx_K_Yxxxxxxxxx
Capana12g000377	197	K	xxxxxxxxxx_K_KAxxxxxxxx
Capana04g000059	123	K	xxxxxxxxxx_K_Nxxxxxxxxx
Capana07g000580	102	K	xxxxxxxxxx_K_Txxxxxxxxx
Capana05g000502	68	K	xxxxxxxxxx_K_Sxxxxxxxxx
Capana03g004412	381	K	xxxxxxxxxx_K_Hxxxxxxxxx
Capana03g002263	139	K	xxxxxxxxxx_K_Hxxxxxxxxx
Capana09g001363	995	K	xxxxxxxxxx_K_Hxxxxxxxxx
Capana07g000991	276	K	xxxxxxxxxx_K_Yxxxxxxxxx
Capana02g002264	231	K	xxxxxxxxxx_K_Sxxxxxxxxx
Capana05g000400	843	K	xxxxxxxxxx_K_Nxxxxxxxxx
Capana07g002415	63	K	xxxxxxxxxx_K_Rxxxxxxxxx
Capana04g001971	192	K	xxxxxxxxxx_K_Rxxxxxxxxx
Capana01g003385	79	K	xxxxxxxxxx_K_Txxxxxxxxx
Capana04g001608	59	K	xxxxxxxxxx_K_Yxxxxxxxxx
Capana01g002397	136	K	xxxxxxxxxx_K_Hxxxxxxxxx
Capana00g003527	120	K	xxxxxxxxxx_K_Yxxxxxxxxx
Capana03g000208	115	K	xxxxxxxxxx_K_KAxxxxxxxx
Capana07g002182	356	K	xxxxxxxxxx_K_Sxxxxxxxxx
Capana00g000871	60	K	xxxxxxxxxx_K_Dxxxxxxxxx
Capana00g002801	41	K	xxxxxxxAxx_K_Pxxxxxxxxx
Capana12g001237	327	K	xxxxxxxxxx_K_Yxxxxxxxxx
Capana11g001910	93	K	xxxxxxxxxx_K_Kxxxxxxxxx
Capana10g002340	62	K	xxxxxxxxxx_K_Rxxxxxxxxx
Capana09g001814	373	K	xxxxxxxxxx_K_xRxxxxxxxx
Capana06g001172	59	K	xxxxxxxxxx_K_Dxxxxxxxxx
Capana06g002294	84	K	xxxxxxxxxY_K_xxxxxxxxxx
Capana01g003521	653	K	xxxxxxxxxx_K_Hxxxxxxxxx
Capana01g002678	264	K	xxxxxxxxxx_K_Kxxxxxxxxx
Capana08g000503	131	K	xxxxxxxxxx_K_Rxxxxxxxxx
Capana12g001237	199	K	xxxxxxxxxx_K_Nxxxxxxxxx
Capana08g001439	126	K	xxxxxxxxxx_K_Rxxxxxxxxx
Capana06g001054	103	K	xxxxxxxxxx_K_Nxxxxxxxxx
Capana01g002007	129	K	xxxxxxxxxx_K_Dxxxxxxxxx
Capana02g001264	517	K	xxxxxxxxxx_K_Kxxxxxxxxx
Capana09g000353	77	K	xxxxxxxxxx_K_Fxxxxxxxxx
Capana03g001538	794	K	xxxxxxxxxx_K_Hxxxxxxxxx
Capana00g004292	276	K	xxxxxxxxxx_K_Hxxxxxxxxx
Capana09g001878	325	K	xxxxxxxxxx_K_Nxxxxxxxxx
Capana02g002050	350	K	xxxxxxxxxY_K_Nxxxxxxxxx
Capana02g000272	443	K	xxxxxxxxxx_K_Yxxxxxxxxx
Capana03g004607	259	K	xxxxxxxxxx_K_Sxxxxxxxxx
Capana04g002355	509	K	xxxxxxxxxx_K_Hxxxxxxxxx
Capana08g000956	359	K	xxxxxxxxxx_K_Hxxxxxxxxx
Capana06g001463	131	K	xxxxxxxxxx_K_Dxxxxxxxxx
Capana02g003498	147	K	xxxxxxxxxx_K_Fxxxxxxxxx
Capana09g000302	106	K	xxxxxxxxxx_K_Rxxxxxxxxx
Capana01g001578	190	K	xxxxxxxxxx_K_Fxxxxxxxxx
Capana10g002302	193	K	xxxxxxxxxx_K_Txxxxxxxxx
Capana12g002223	285	K	xxxxxxxxxx_K_Rxxxxxxxxx
Capana08g002398	31	K	xxxxxxxxxx_K_Hxxxxxxxxx
Capana08g000754	1552	K	xxxxxxxxxx_K_xRxxxxxxxx
Capana10g002199	233	K	xxxxxxxxxx_K_Txxxxxxxxx
Capana11g001855	724	K	xxxxxxxxxx_K_Yxxxxxxxxx
Capana12g002824	353	K	xxxxxxxxxx_K_Hxxxxxxxxx
Capana10g001865	107	K	xxxxxxxxxx_K_Wxxxxxxxxx
Capana06g000142	19	K	xxxxxxxxxx_K_Dxxxxxxxxx
Capana05g000023	266	K	xxxxxxxxxx_K_Nxxxxxxxxx
Capana02g001529	10	K	xxxxxxxxxx_K_Kxxxxxxxxx
Capana01g000625	142	K	xxxxxxxxxx_K_Dxxxxxxxxx
Capana01g001041	271	K	xxxxxxxxxx_K_Sxxxxxxxxx
Capana03g004095	11	K	xxxxxxxxxx_K_Sxxxxxxxxx
Capana08g000628	324	K	xxxxxxxxxx_K_Yxxxxxxxxx
Capana09g000128	70	K	xxxxxxxxxx_K_xExxxxxxxx
Capana00g004496	161	K	xxxxxxxxxx_K_Txxxxxxxxx
Capana08g001171	275	K	xxxxxxxxxx_K_Hxxxxxxxxx
Capana08g002409	62	K	xxxxxxxxxx_K_Fxxxxxxxxx
Capana00g002602	745	K	xxxxxxxxxx_K_Wxxxxxxxxx
Capana03g000068	487	K	xxxxxxxxxx_K_Sxxxxxxxxx
Capana07g001239	429	K	xxxxxxxxxY_K_xxxxxxxxxx
Capana10g001445	124	K	xxxxxxxxxx_K_Sxxxxxxxxx
Capana04g001135	146	K	xxxxxxxxxx_K_Nxxxxxxxxx
Capana07g000235	57	K	xxxxxxxxxx_K_Rxxxxxxxxx
Capana00g001661	188	K	xxxxxxxxxx_K_Txxxxxxxxx
Capana08g000039	445	K	xxxxxxxxxx_K_Nxxxxxxxxx
Capana08g002518	299	K	xxxxxxxxHx_K_xxxxxxxxxx
Capana08g001499	8	K	xxxxxxxxxT_K_xxxxxxxxxx
Capana00g000623	119	K	xxxxxxxxxY_K_Nxxxxxxxxx
Capana01g003957	128	K	xxxxxxxxxY_K_xxxxxxxxxx
Capana03g002890	392	K	xxxxxxxxxx_K_Rxxxxxxxxx
Capana08g000243	224	K	xxxxxxxxxx_K_Hxxxxxxxxx
Capana00g003516	46	K	xxxxxxxxxx_K_Txxxxxxxxx
Capana09g000159	592	K	xxxxxxxxxx_K_Rxxxxxxxxx
Capana06g000726	56	K	xxxxxxxxxx_K_Txxxxxxxxx
Capana04g000951	65	K	xxxxxxxxxx_K_xExxxxxxxx
Capana03g001207	67	K	xxxxxxxxxx_K_Fxxxxxxxxx
Capana12g002820	257	K	xxxxxxxxxx_K_Txxxxxxxxx
Capana07g000951	29	K	xxxxxxxxxx_K_Hxxxxxxxxx
Capana08g002518	212	K	xxxxxxxxxx_K_Sxxxxxxxxx
Capana03g000791	281	K	xxxxxxxxxH_K_xxxxxxxxxx
Capana07g000132	367	K	xxxxxxxxxx_K_Hxxxxxxxxx
Capana09g000087	164	K	xxxxxxxxxx_K_Sxxxxxxxxx
Capana07g002132	757	K	xxxxxxxxxx_K_Sxxxxxxxxx
Capana01g003067	362	K	xxxxxxxxxx_K_Hxxxxxxxxx
Capana04g001008	62	K	xxxxxxxxxx_K_Yxxxxxxxxx
Capana06g002892	240	K	xxxxxxxxxY_K_xxxxxxxxxx
Capana07g002457	136	K	xxxxxxxxxx_K_Kxxxxxxxxx
Capana06g001195	483	K	xxxxxxxxxx_K_Fxxxxxxxxx
Capana06g000946	227	K	xxxxxxxxHx_K_xxxxxxxxxx
Capana02g001277	134	K	xxxxxxxxxx_K_Hxxxxxxxxx
Capana06g001714	81	K	xxxxxxxxxx_K_xExxxxxxxx
Capana12g002455	96	K	xxxxxxxxxx_K_Kxxxxxxxxx
Capana06g001315	270	K	xxxxxxxxxx_K_Hxxxxxxxxx
Capana03g001353	176	K	xxxxxxxxxY_K_xxxxxxxxxx
Capana09g001723	96	K	xxxxxxxxxx_K_Nxxxxxxxxx
Capana06g001274	99	K	xxxxxxxxxx_K_Rxxxxxxxxx
Capana05g002207	151	K	xxxxxxxxHx_K_xxxxxxxxxx
Capana07g000771	266	K	xxxxxxxxxx_K_Nxxxxxxxxx
Capana11g000087	151	K	xxxxxxxxxx_K_Nxxxxxxxxx
Capana02g002926	404	K	xxxxxxxxHx_K_xxxxxxxxxx
Capana04g001288	68	K	xxxxxxxxxH_K_xxxxxxxxxx
Capana02g000894	229	K	xxxxxxxxxT_K_xxxxxxxxxx
Capana07g000584	1075	K	xxxxxxxxxx_K_xExxxxxxxx
Capana03g003654	293	K	xxxxxxxxxx_K_Hxxxxxxxxx
Capana04g001638	131	K	xxxxxxxxxx_K_Yxxxxxxxxx
Capana08g001129	109	K	xxxxxxxxxx_K_Hxxxxxxxxx
Capana08g001422	99	K	xxxxxxxxxx_K_Yxxxxxxxxx
Capana02g001556	381	K	xxxxxxxxxx_K_Nxxxxxxxxx
Capana04g000100	65	K	xxxxxxxxxH_K_xxxxxxxxxx
Capana01g002147	104	K	xxxxxxxxxx_K_Yxxxxxxxxx
Capana09g000225	220	K	xxxxxxxxxY_K_xxxxxxxxxx
Capana02g003324	401	K	xxxxxxxxxx_K_Sxxxxxxxxx
Capana00g004560	383	K	xxxxxxxxxx_K_xRxxxxxxxx
Capana06g000973	317	K	xxxxxxxxxx_K_Nxxxxxxxxx
Capana12g001220	218	K	xxxxxxxxxx_K_Fxxxxxxxxx
Capana04g000625	57	K	xxxxxxxxxx_K_Rxxxxxxxxx
Capana11g001409	119	K	xxxxxxxxxx_K_Wxxxxxxxxx
Capana04g000324	99	K	xxxxxxxxxx_K_Fxxxxxxxxx
Capana01g001216	75	K	xxxxxxxxxx_K_Yxxxxxxxxx
Capana03g000068	452	K	xxxxxxxxxx_K_Nxxxxxxxxx
Capana10g001551	182	K	xxxxxxxxxx_K_Sxxxxxxxxx
Capana00g003563	659	K	xxxxxxxxxx_K_Sxxxxxxxxx
Capana03g002309	83	K	xxxxxxxxxx_K_KAxxxxxxxx
Capana03g003647	163	K	xxxxxxxxHx_K_xxxxxxxxxx
Capana12g001717	1631	K	xxxxxxxxxx_K_Fxxxxxxxxx
Capana02g002324	445	K	xxxxxxxxxx_K_Kxxxxxxxxx
Capana12g002700	92	K	xxxxxxxxxx_K_Dxxxxxxxxx
Capana03g001701	147	K	xxxxxxxxxx_K_Hxxxxxxxxx
Capana12g000358	219	K	xxxxxxxxxx_K_Sxxxxxxxxx
Capana05g002474	20	K	xxxxxxxxxx_K_Sxxxxxxxxx
Capana03g001811	277	K	xxxxxxxxxx_K_Nxxxxxxxxx
Capana11g001282	198	K	xxxxxxxxxx_K_xExxxxxxxx
Capana11g002235	271	K	xxxxxxxxxx_K_Fxxxxxxxxx
Capana02g000764	159	K	xxxxxxxxxT_K_xxxxxxxxxx
Capana07g000643	393	K	xxxxxxxxxx_K_Nxxxxxxxxx
Capana03g004217	267	K	xxxxxxxxxx_K_Rxxxxxxxxx
Capana10g001446	269	K	xxxxxxxxxx_K_Sxxxxxxxxx
Capana00g004559	417	K	xxxxxxxxxx_K_Nxxxxxxxxx
Capana08g002533	102	K	xxxxxxxxxY_K_xxxxxxxxxx
Capana04g000054	160	K	xxxxxxxxxx_K_Wxxxxxxxxx
Capana10g000740	323	K	xxxxxxxxxH_K_xxxxxxxxxx
Capana04g000331	48	K	xxxxxxxxxx_K_KIxxxxxxxx
Capana02g000008	50	K	xxxxxxxxxx_K_Sxxxxxxxxx
Capana05g002550	183	K	xxxxxxxxxx_K_Kxxxxxxxxx
Capana02g002775	13	K	xxxxxxxxxx_K_Fxxxxxxxxx
Capana12g002799	736	K	xxxxxxxxxx_K_Yxxxxxxxxx
Capana01g003225	239	K	xxxxxxxxxx_K_Rxxxxxxxxx
Capana05g002292	726	K	xxxxxxxxxx_K_Hxxxxxxxxx
Capana08g000763	71	K	xxxxxxxxxx_K_Sxxxxxxxxx
Capana07g002244	33	K	xxxxxxxxxx_K_Sxxxxxxxxx
Capana05g002474	13	K	xxxxxxxxxx_K_Txxxxxxxxx
Capana10g000033	163	K	xxxxxxxxxx_K_KAxxxxxxxx
Capana11g002151	383	K	xxxxxxxxxY_K_Nxxxxxxxxx
Capana10g001534	86	K	xxxxxxxxxx_K_Sxxxxxxxxx
Capana11g000069	127	K	xxxxxxxxxx_K_Txxxxxxxxx
Capana11g002255	91	K	xxxxxxxxxx_K_Fxxxxxxxxx
Capana01g000684	250	K	xxxxxxxxxx_K_Sxxxxxxxxx
Capana06g001062	872	K	xxxxxxxxxx_K_Wxxxxxxxxx
Capana03g000028	171	K	xxxxxxxxxx_K_Rxxxxxxxxx
Capana08g000217	153	K	xxxxxxxxxx_K_Yxxxxxxxxx
Capana05g002550	85	K	xxxxxxxxxY_K_xxxxxxxxxx
Capana11g000773	249	K	xxxxxxxxxx_K_Rxxxxxxxxx
Capana03g000028	163	K	xxxxxxxxxx_K_Kxxxxxxxxx
Capana04g002111	138	K	xxxxxxxxxx_K_Hxxxxxxxxx
Capana00g002624	128	K	xxxxxxxxHx_K_xxxxxxxxxx
Capana06g000144	393	K	xxxxxxxxxx_K_Rxxxxxxxxx
Capana10g002199	83	K	xxxxxxxxxx_K_Fxxxxxxxxx
Capana07g001733	338	K	xxxxxxxxxx_K_Nxxxxxxxxx
Capana04g000494	269	K	xxxxxxxxxx_K_Fxxxxxxxxx
Capana07g001441	420	K	xxxxxxxxxx_K_Fxxxxxxxxx
Capana02g003402	21	K	xxxxxxxxxY_K_xxxxxxxxxx
Capana10g000033	82	K	xxxxxxxxxx_K_Hxxxxxxxxx
Capana03g003710	238	K	xxxxxxxxxx_K_Hxxxxxxxxx
Capana02g002193	347	K	xxxxxxxxxx_K_Kxxxxxxxxx
Capana05g001001	130	K	xxxxxxxxxx_K_Nxxxxxxxxx
Capana06g000811	55	K	xxxxxxxxxT_K_xxxxxxxxxx
Capana04g000086	209	K	xxxxxxxxxx_K_Hxxxxxxxxx
Capana07g000220	42	K	xxxxxxxxxx_K_Txxxxxxxxx
Capana03g004633	151	K	xxxxxxxxxx_K_xExxxxxxxx
Capana01g001226	222	K	xxxxxxxxxx_K_Sxxxxxxxxx
Capana06g000553	15	K	xxxxxxxAxx_K_Pxxxxxxxxx
Capana08g000846	233	K	xxxxxxxxxx_K_Wxxxxxxxxx
Capana11g002347	173	K	xxxxxxxxxY_K_xxxxxxxxxx
Capana06g002615	257	K	xxxxxxxxxx_K_Fxxxxxxxxx
Capana04g001008	8	K	xxxxxxxxxH_K_xxxxxxxxxx
Capana01g001574	175	K	xxxxxxxxxx_K_Nxxxxxxxxx
Capana02g000490	112	K	xxxxxxxxxH_K_xxxxxxxxxx
Capana11g000234	366	K	xxxxxxxxxx_K_Nxxxxxxxxx
Capana08g002729	48	K	xxxxxxxxxx_K_Sxxxxxxxxx
Capana01g000988	582	K	xxxxxxxxxx_K_Dxxxxxxxxx
Capana05g001224	129	K	xxxxxxxxxx_K_Txxxxxxxxx
Capana07g000214	72	K	xxxxxxxxxx_K_Txxxxxxxxx
Capana03g000357	31	K	xxxxxxxxxx_K_Sxxxxxxxxx
Capana11g002212	840	K	xxxxxxxxxx_K_Hxxxxxxxxx
Capana06g000226	131	K	xxxxxxxxxx_K_Hxxxxxxxxx
Capana12g000480	148	K	xxxxxxxxxx_K_Sxxxxxxxxx
Capana09g000191	474	K	xxxxxxxxxx_K_Nxxxxxxxxx
Capana07g000048	327	K	xxxxxxxxxH_K_xxxxxxxxxx
Capana06g000850	129	K	xxxxxxxxxx_K_Yxxxxxxxxx
Capana03g004398	475	K	xxxxxxxxxx_K_Sxxxxxxxxx
Capana03g000813	78	K	xxxxxxxxxx_K_Sxxxxxxxxx
Capana09g001456	210	K	xxxxxxxxHx_K_xxxxxxxxxx
Capana02g001558	72	K	xxxxxxxxxx_K_Rxxxxxxxxx
Capana06g000726	209	K	xxxxxxxxxx_K_Yxxxxxxxxx
Capana00g002001	121	K	xxxxxxxxxx_K_Yxxxxxxxxx
Capana12g001691	361	K	xxxxxxxxxx_K_xExxxxxxxx
Capana10g001943	101	K	xxxxxxxxxx_K_Kxxxxxxxxx
Capana09g001864	70	K	xxxxxxxxxY_K_xxxxxxxxxx
Capana12g000010	97	K	xxxxxxxxxx_K_Kxxxxxxxxx
Capana02g003498	85	K	xxxxxxxxxx_K_xExxxxxxxx
Capana12g002824	441	K	xxxxxxxxxx_K_Txxxxxxxxx
Capana02g003124	1479	K	xxxxxxxxxx_K_Hxxxxxxxxx
Capana08g002396	111	K	xxxxxxxxxx_K_Sxxxxxxxxx
Capana02g002977	45	K	xxxxxxxxxY_K_Nxxxxxxxxx
Capana08g001094	269	K	xxxxxxxxxx_K_Fxxxxxxxxx
Capana03g003534	167	K	xxxxxxxxxx_K_Hxxxxxxxxx
Capana04g000186	368	K	xxxxxxxxxx_K_Yxxxxxxxxx
Capana10g002214	440	K	xxxxxxxxxx_K_Hxxxxxxxxx
Capana08g002605	143	K	xxxxxxxxxx_K_Sxxxxxxxxx
Capana03g003579	185	K	xxxxxxxxxx_K_Yxxxxxxxxx
Capana00g003131	140	K	xxxxxxxxxx_K_Wxxxxxxxxx
Capana03g000373	868	K	xxxxxxxxxx_K_Rxxxxxxxxx
Capana03g000905	135	K	xxxxxxxxxx_K_Fxxxxxxxxx
Capana08g000270	275	K	xxxxxxxxxx_K_xRxxxxxxxx
Capana03g001456	92	K	xxxxxxxxxx_K_Fxxxxxxxxx
Capana01g000877	132	K	xxxxxxxxxx_K_Yxxxxxxxxx
Capana11g000474	165	K	xxxxxxxxxx_K_Nxxxxxxxxx
Capana05g001871	68	K	xxxxxxxxxx_K_Nxxxxxxxxx
Capana08g002351	174	K	xxxxxxxxxx_K_Rxxxxxxxxx
Capana01g001578	393	K	xxxxxxxxxx_K_Fxxxxxxxxx
Capana07g000146	241	K	xxxxxxxxxx_K_Yxxxxxxxxx
Capana02g001264	24	K	xxxxxxxxxx_K_Wxxxxxxxxx
Capana02g001982	250	K	xxxxxxxxxx_K_Hxxxxxxxxx
Capana03g001456	56	K	xxxxxxxxxx_K_Txxxxxxxxx
Capana08g001920	203	K	xxxxxxxxxx_K_Kxxxxxxxxx
Capana11g001999	96	K	xxxxxxxxxx_K_Yxxxxxxxxx
Capana08g002443	109	K	xxxxxxxxxx_K_Fxxxxxxxxx
Capana12g001493	88	K	xxxxxxxxxx_K_Txxxxxxxxx
Capana02g002247	78	K	xxxxxxxxxx_K_KAxxxxxxxx
Capana00g003324	25	K	xxxxxxxxxx_K_Rxxxxxxxxx
Capana08g001595	211	K	xxxxxxxxxx_K_Yxxxxxxxxx
Capana04g001765	132	K	xxxxxxxxxx_K_Kxxxxxxxxx
Capana03g001854	53	K	xxxxxxxxxx_K_Hxxxxxxxxx
Capana08g000511	153	K	xxxxxxxxxx_K_xExxxxxxxx
Capana06g000944	78	K	xxxxxxxxxx_K_Hxxxxxxxxx
Capana07g002194	161	K	xxxxxxxxxx_K_Sxxxxxxxxx
Capana04g000974	80	K	xxxxxxxxxx_K_Txxxxxxxxx
Capana01g003049	112	K	xxxxxxxxxx_K_Wxxxxxxxxx
Capana10g001562	54	K	xxxxxxxxxx_K_Kxxxxxxxxx
Capana12g000537	400	K	xxxxxxxxxx_K_Fxxxxxxxxx
Capana07g000220	426	K	xxxxxxxxxx_K_Dxxxxxxxxx
Capana11g001898	76	K	xxxxxxxxxx_K_Yxxxxxxxxx
Capana06g000724	17	K	xxxxxxxxxx_K_Yxxxxxxxxx
Capana12g000742	274	K	xxxxxxxxxx_K_Dxxxxxxxxx
Capana11g000474	152	K	xxxxxxxxxx_K_Yxxxxxxxxx
Capana09g000348	13	K	xxxxxxxxxx_K_Txxxxxxxxx
Capana10g002504	360	K	xxxxxxxxxx_K_Nxxxxxxxxx
Capana01g003049	169	K	xxxxxxxxxH_K_xxxxxxxxxx
Capana08g001777	132	K	xxxxxxxxxx_K_Yxxxxxxxxx
Capana10g001920	503	K	xxxxxxxxxx_K_Sxxxxxxxxx
Capana01g000620	57	K	xxxxxxxxxx_K_Yxxxxxxxxx
Capana12g002146	8	K	xxxxxxxxxx_K_Sxxxxxxxxx
Capana06g000944	89	K	xxxxxxxxxx_K_Hxxxxxxxxx
Capana00g000900	128	K	xxxxxxxxxY_K_xxxxxxxxxx
Capana10g001865	217	K	xxxxxxxxxx_K_Hxxxxxxxxx
Capana10g002327	338	K	xxxxxxxxxx_K_Hxxxxxxxxx
Capana03g002786	273	K	xxxxxxxxxx_K_Txxxxxxxxx
Capana09g001864	231	K	xxxxxxxxxY_K_Nxxxxxxxxx
Capana04g000274	61	K	xxxxxxxxxx_K_Sxxxxxxxxx
Capana03g004129	56	K	xxxxxxxxxH_K_xxxxxxxxxx
Capana01g004201	110	K	xxxxxxxxxx_K_Fxxxxxxxxx
Capana06g002092	271	K	xxxxxxxxxT_K_xxxxxxxxxx
Capana06g000670	79	K	xxxxxxxxxx_K_Kxxxxxxxxx
Capana00g003394	109	K	xxxxxxxxxx_K_Hxxxxxxxxx
Capana04g001135	14	K	xxxxxxxxxx_K_Wxxxxxxxxx
Capana06g002092	185	K	xxxxxxxxxx_K_Yxxxxxxxxx
Capana02g002264	159	K	xxxxxxxxxT_K_xxxxxxxxxx
Capana06g001122	384	K	xxxxxxxxxx_K_Dxxxxxxxxx
Capana02g001694	117	K	xxxxxxxxxY_K_Nxxxxxxxxx
Capana00g001263	99	K	xxxxxxxxxx_K_Fxxxxxxxxx
Capana01g001341	179	K	xxxxxxxxxx_K_Fxxxxxxxxx
Capana08g000545	632	K	xxxxxxxxxx_K_KIxxxxxxxx
Capana05g001020	423	K	xxxxxxxxxx_K_Nxxxxxxxxx
Capana06g002939	254	K	xxxxxxxxxx_K_Rxxxxxxxxx
Capana03g001692	178	K	xxxxxxxxxx_K_xExxxxxxxx
Capana10g002223	248	K	xxxxxxxxxx_K_Yxxxxxxxxx
Capana09g001878	110	K	xxxxxxxxxT_K_xxxxxxxxxx
Capana03g001208	358	K	xxxxxxxxxx_K_Rxxxxxxxxx
Capana10g000429	310	K	xxxxxxxxxx_K_Dxxxxxxxxx
Capana01g000988	505	K	xxxxxxxxxx_K_Sxxxxxxxxx
Capana01g000279	216	K	xxxxxxxxxx_K_Sxxxxxxxxx
Capana00g000308	33	K	xxxxxxxxxx_K_Wxxxxxxxxx
Capana08g001246	60	K	xxxxxxxxxx_K_Nxxxxxxxxx
Capana05g000123	152	K	xxxxxxxxxx_K_Nxxxxxxxxx
Capana08g001965	368	K	xxxxxxxxxx_K_Fxxxxxxxxx
Capana02g003506	501	K	xxxxxxxxxx_K_Kxxxxxxxxx
Capana07g001488	339	K	xxxxxxxxxx_K_Hxxxxxxxxx
Capana12g002146	39	K	xxxxxxxxxx_K_Nxxxxxxxxx
Capana00g004571	114	K	xxxxxxxxxx_K_Yxxxxxxxxx
Capana03g003941	114	K	xxxxxxxxxx_K_Wxxxxxxxxx
Capana08g002627	94	K	xxxxxxxxxx_K_Fxxxxxxxxx
Capana06g001172	258	K	xxxxxxxxxx_K_Nxxxxxxxxx
Capana04g002068	317	K	xxxxxxxxxx_K_Wxxxxxxxxx
Capana00g000559	48	K	xxxxxxxxxx_K_Kxxxxxxxxx
Capana01g002363	421	K	xxxxxxxxxY_K_xxxxxxxxxx
Capana11g000137	67	K	xxxxxxxxxx_K_Sxxxxxxxxx
Capana06g000338	338	K	xxxxxxxxxx_K_Rxxxxxxxxx
Capana12g002477	220	K	xxxxxxxxxx_K_Yxxxxxxxxx
Capana06g003058	206	K	xxxxxxxxxx_K_Txxxxxxxxx
Capana05g002436	136	K	xxxxxxxxxx_K_Yxxxxxxxxx
Capana07g002456	242	K	xxxxxxxxxx_K_Fxxxxxxxxx
Capana06g000154	146	K	xxxxxxxxxx_K_Hxxxxxxxxx
Capana05g001077	45	K	xxxxxxxxxx_K_xExxxxxxxx
Capana07g000907	121	K	xxxxxxxxxx_K_Dxxxxxxxxx
Capana03g004633	36	K	xxxxxxxxxT_K_xxxxxxxxxx
Capana01g002411	237	K	xxxxxxxxxx_K_Sxxxxxxxxx
Capana01g001001	13	K	xxxxxxxxHx_K_xxxxxxxxxx
Capana08g000222	155	K	xxxxxxxxxx_K_Txxxxxxxxx
Capana01g002602	72	K	xxxxxxxxxx_K_Hxxxxxxxxx
Capana06g000726	395	K	xxxxxxxxxx_K_Nxxxxxxxxx
Capana00g005036	809	K	xxxxxxxxxx_K_Nxxxxxxxxx
Capana11g001383	74	K	xxxxxxxxxx_K_xExxxxxxxx
Capana12g000537	67	K	xxxxxxxxxx_K_Rxxxxxxxxx
Capana03g004084	479	K	xxxxxxxxxY_K_xxxxxxxxxx
Capana08g002554	166	K	xxxxxxxxxx_K_Yxxxxxxxxx
Capana08g002087	38	K	xxxxxxxxxx_K_Fxxxxxxxxx
Capana01g002025	515	K	xxxxxxxxxx_K_Nxxxxxxxxx
Capana10g002385	300	K	xxxxxxxxxT_K_xxxxxxxxxx
Capana02g001487	213	K	xxxxxxxxxx_K_Fxxxxxxxxx
Capana06g001731	69	K	xxxxxxxxxx_K_Yxxxxxxxxx
Capana08g001242	39	K	xxxxxxxxxx_K_Txxxxxxxxx
Capana08g002743	22	K	xxxxxxxxxx_K_Sxxxxxxxxx
Capana04g000158	554	K	xxxxxxxxxx_K_Hxxxxxxxxx
Capana03g000928	257	K	xxxxxxxxxx_K_Sxxxxxxxxx
Capana04g001731	383	K	xxxxxxxxxx_K_Wxxxxxxxxx
Capana01g004115	166	K	xxxxxxxxxx_K_Kxxxxxxxxx
Capana06g002170	73	K	xxxxxxxxxx_K_Rxxxxxxxxx
Capana00g005060	25	K	xxxxxxxxHx_K_xxxxxxxxxx
Capana04g001050	81	K	xxxxxxxxxx_K_Rxxxxxxxxx
Capana11g001672	156	K	xxxxxxxxxx_K_Hxxxxxxxxx
Capana05g000037	19	K	xxxxxxxxxx_K_Fxxxxxxxxx
Capana07g000145	130	K	xxxxxxxxxx_K_Sxxxxxxxxx
Capana10g001856	157	K	xxxxxxxxxx_K_Nxxxxxxxxx
Capana08g002361	81	K	xxxxxxxxxx_K_Sxxxxxxxxx
Capana04g000041	81	K	xxxxxxxxxx_K_Hxxxxxxxxx
Capana01g002460	492	K	xxxxxxxxxx_K_Fxxxxxxxxx
Capana06g000018	131	K	xxxxxxxxxx_K_Rxxxxxxxxx
Capana10g002060	153	K	xxxxxxxxxx_K_Yxxxxxxxxx
Capana03g002677	406	K	xxxxxxxxxx_K_Hxxxxxxxxx
Capana02g002790	71	K	xxxxxxxxxx_K_Rxxxxxxxxx
Capana01g003759	171	K	xxxxxxxxxx_K_Nxxxxxxxxx
Capana06g000811	62	K	xxxxxxxxxx_K_Hxxxxxxxxx
Capana11g002306	74	K	xxxxxxxxxx_K_Nxxxxxxxxx
Capana06g000146	212	K	xxxxxxxxxx_K_Wxxxxxxxxx
Capana05g000518	230	K	xxxxxxxxxx_K_Rxxxxxxxxx
Capana00g003085	148	K	xxxxxxxxxx_K_Hxxxxxxxxx
Capana01g003678	105	K	xxxxxxxxxx_K_Fxxxxxxxxx
Capana06g002092	263	K	xxxxxxxxxx_K_Rxxxxxxxxx
Capana06g000900	13	K	xxxxxxxxxx_K_Sxxxxxxxxx
Capana11g000358	292	K	xxxxxxxxxx_K_Hxxxxxxxxx
Capana07g002139	237	K	xxxxxxxxxx_K_Rxxxxxxxxx
Capana08g001658	271	K	xxxxxxxxxx_K_Yxxxxxxxxx
Capana07g001928	207	K	xxxxxxxxxx_K_Dxxxxxxxxx
Capana02g000067	294	K	xxxxxxxxxx_K_Nxxxxxxxxx
Capana03g004113	166	K	xxxxxxxxxY_K_Nxxxxxxxxx
Capana06g002960	465	K	xxxxxxxxxx_K_Nxxxxxxxxx
Capana10g002177	532	K	xxxxxxxxxx_K_Hxxxxxxxxx
Capana05g001001	399	K	xxxxxxxxxx_K_Kxxxxxxxxx
Capana09g001928	487	K	xxxxxxxxxx_K_Sxxxxxxxxx
Capana12g000742	280	K	xxxxxxxxxx_K_Sxxxxxxxxx
Capana02g002898	42	K	xxxxxxxxxx_K_Yxxxxxxxxx
Capana11g000234	371	K	xxxxxxxxxx_K_Hxxxxxxxxx
Capana02g003611	164	K	xxxxxxxxxx_K_Sxxxxxxxxx
Capana08g002744	182	K	xxxxxxxxxx_K_Wxxxxxxxxx
Capana02g001555	293	K	xxxxxxxxxx_K_Kxxxxxxxxx
Capana11g001954	275	K	xxxxxxxxxx_K_Sxxxxxxxxx
Capana07g000220	83	K	xxxxxxxxxH_K_xxxxxxxxxx
Capana07g002410	547	K	xxxxxxxxxx_K_Dxxxxxxxxx
Capana08g002241	253	K	xxxxxxxxxx_K_Sxxxxxxxxx
Capana04g000625	53	K	xxxxxxxxxx_K_Kxxxxxxxxx
Capana12g001992	46	K	xxxxxxxxxx_K_KAxxxxxxxx
Capana01g004129	384	K	xxxxxxxxxx_K_Txxxxxxxxx
Capana06g001915	143	K	xxxxxxxxxY_K_xxxxxxxxxx
Capana12g002408	14	K	xxxxxxxAxx_K_Pxxxxxxxxx
Capana03g000280	196	K	xxxxxxxxxx_K_Hxxxxxxxxx
Capana02g000489	337	K	xxxxxxxxxx_K_Yxxxxxxxxx
Capana06g000671	174	K	xxxxxxxxxx_K_Kxxxxxxxxx
Capana03g004607	313	K	xxxxxxxxxx_K_xRxxxxxxxx
Capana12g001722	21	K	xxxxxxxxxx_K_KAxxxxxxxx
Capana09g001643	344	K	xxxxxxxxxx_K_xExxxxxxxx
Capana07g002319	166	K	xxxxxxxxxY_K_xxxxxxxxxx
Capana00g005036	997	K	xxxxxxxxxx_K_Sxxxxxxxxx
Capana10g001963	135	K	xxxxxxxxxx_K_Hxxxxxxxxx
Capana08g000041	406	K	xxxxxxxxxY_K_xxxxxxxxxx
Capana06g000144	41	K	xxxxxxxxxx_K_Yxxxxxxxxx
Capana09g001798	87	K	xxxxxxxxxx_K_Yxxxxxxxxx
Capana06g001002	196	K	xxxxxxxxxx_K_Yxxxxxxxxx
Capana12g000873	278	K	xxxxxxxxxx_K_Nxxxxxxxxx
Capana03g003115	95	K	xxxxxxxxxx_K_Rxxxxxxxxx
Capana10g002475	159	K	xxxxxxxxxx_K_Kxxxxxxxxx
Capana10g002475	247	K	xxxxxxxxxx_K_Wxxxxxxxxx
Capana07g001429	862	K	xxxxxxxxxx_K_Sxxxxxxxxx
Capana00g004785	401	K	xxxxxxxxxx_K_Dxxxxxxxxx
Capana11g001227	95	K	xxxxxxxxxx_K_Sxxxxxxxxx
Capana01g000808	91	K	xxxxxxxxxx_K_Yxxxxxxxxx
Capana12g002466	81	K	xxxxxxxxxx_K_Fxxxxxxxxx
Capana00g003486	272	K	xxxxxxxxxx_K_KIxxxxxxxx
Capana01g001202	138	K	xxxxxxxxxx_K_Nxxxxxxxxx
Capana03g003115	123	K	xxxxxxxxxx_K_Sxxxxxxxxx
Capana06g002923	27	K	xxxxxxxxxx_K_Yxxxxxxxxx
Capana03g003700	194	K	xxxxxxxxxx_K_Yxxxxxxxxx
Capana01g000988	356	K	xxxxxxxxxx_K_Hxxxxxxxxx
Capana03g000208	47	K	xxxxxxxxxx_K_Hxxxxxxxxx
Capana08g002376	94	K	xxxxxxxxxx_K_Yxxxxxxxxx
Capana01g000791	172	K	xxxxxxxxxx_K_Kxxxxxxxxx
Capana03g002198	251	K	xxxxxxxxxx_K_Sxxxxxxxxx
Capana08g002146	260	K	xxxxxxxxxx_K_Dxxxxxxxxx
Capana07g000235	67	K	xxxxxxxxxY_K_xxxxxxxxxx
Capana05g000935	152	K	xxxxxxxxxx_K_Kxxxxxxxxx
Capana02g002133	144	K	xxxxxxxxxx_K_Dxxxxxxxxx
Capana02g000053	97	K	xxxxxxxxxx_K_Sxxxxxxxxx
Capana01g000505	770	K	xxxxxxxxxx_K_Fxxxxxxxxx
Capana11g001281	266	K	xxxxxxxxxx_K_xExxxxxxxx
Capana03g000726	140	K	xxxxxxxxxx_K_Yxxxxxxxxx
Capana08g000039	185	K	xxxxxxxxxx_K_Sxxxxxxxxx
Capana04g000951	58	K	xxxxxxxxxx_K_xRxxxxxxxx
Capana12g001177	86	K	xxxxxxxxxx_K_Sxxxxxxxxx
Capana06g002615	282	K	xxxxxxxxxx_K_Yxxxxxxxxx
Capana07g000220	31	K	xxxxxxxxxx_K_Sxxxxxxxxx
Capana08g000316	360	K	xxxxxxxxxx_K_Hxxxxxxxxx
Capana07g002476	123	K	xxxxxxxxxx_K_Fxxxxxxxxx
Capana10g000172	221	K	xxxxxxxxxx_K_Hxxxxxxxxx
Capana07g002011	33	K	xxxxxxxxxY_K_xxxxxxxxxx
Capana00g003079	529	K	xxxxxxxxxx_K_Rxxxxxxxxx
Capana03g001110	51	K	xxxxxxxxxx_K_Txxxxxxxxx
Capana06g000671	175	K	xxxxxxxxxx_K_Dxxxxxxxxx
Capana02g002977	43	K	xxxxxxxxxx_K_Yxxxxxxxxx
Capana08g002538	55	K	xxxxxxxxxx_K_Dxxxxxxxxx
Capana04g001943	363	K	xxxxxxxxxx_K_Rxxxxxxxxx
Capana10g000018	160	K	xxxxxxxxxx_K_Yxxxxxxxxx
Capana00g002436	735	K	xxxxxxxxxx_K_Hxxxxxxxxx
Capana01g004373	293	K	xxxxxxxxxx_K_xExxxxxxxx
Capana08g001652	124	K	xxxxxxxxxx_K_Txxxxxxxxx
Capana06g000734	246	K	xxxxxxxxxx_K_Nxxxxxxxxx
Capana07g000457	228	K	xxxxxxxxxx_K_Hxxxxxxxxx
Capana09g001602	572	K	xxxxxxxxxx_K_Rxxxxxxxxx
Capana03g000942	250	K	xxxxxxxxxx_K_Rxxxxxxxxx
Capana09g000882	224	K	xxxxxxxxxx_K_Hxxxxxxxxx
Capana06g003058	24	K	xxxxxxxxxx_K_Nxxxxxxxxx
Capana11g001910	169	K	xxxxxxxxxx_K_Hxxxxxxxxx
Capana02g003507	174	K	xxxxxxxxxx_K_Kxxxxxxxxx
Capana08g001309	727	K	xxxxxxxxxx_K_Hxxxxxxxxx
Capana00g001182	8	K	xxxxxxxxxx_K_Txxxxxxxxx
Capana11g000555	15	K	xxxxxxxxxx_K_Sxxxxxxxxx
Capana12g000503	316	K	xxxxxxxxxx_K_Nxxxxxxxxx
Capana11g000212	13	K	xxxxxxxxxx_K_Dxxxxxxxxx
Capana12g000479	382	K	xxxxxxxxxx_K_Hxxxxxxxxx
Capana08g001512	218	K	xxxxxxxxxx_K_Yxxxxxxxxx
Capana03g004628	256	K	xxxxxxxxHx_K_xxxxxxxxxx
Capana03g001348	159	K	xxxxxxxxxx_K_Nxxxxxxxxx
Capana06g000333	114	K	xxxxxxxxxx_K_Yxxxxxxxxx
Capana08g001688	82	K	xxxxxxxxxx_K_Wxxxxxxxxx
Capana04g000836	280	K	xxxxxxxxxx_K_Hxxxxxxxxx
Capana00g004936	1443	K	xxxxxxxxxx_K_Hxxxxxxxxx
Capana05g000871	30	K	xxxxxxxxxY_K_xxxxxxxxxx
Capana10g000102	350	K	xxxxxxxxxx_K_Hxxxxxxxxx
Capana06g000899	128	K	xxxxxxxxxx_K_Hxxxxxxxxx
Capana06g001736	432	K	xxxxxxxxxx_K_KAxxxxxxxx
Capana07g000552	478	K	xxxxxxxxxT_K_xxxxxxxxxx
Capana12g002824	202	K	xxxxxxxxxx_K_Nxxxxxxxxx
Capana09g000173	191	K	xxxxxxxxxx_K_Fxxxxxxxxx
Capana09g000159	108	K	xxxxxxxxxx_K_Hxxxxxxxxx
Capana01g002320	19	K	xxxxxxxxxY_K_xxxxxxxxxx
Capana04g000647	163	K	xxxxxxxxxx_K_Nxxxxxxxxx
Capana02g001675	433	K	xxxxxxxxxx_K_Rxxxxxxxxx
Capana09g002017	56	K	xxxxxxxxxx_K_Yxxxxxxxxx
Capana08g001390	187	K	xxxxxxxxxx_K_Dxxxxxxxxx
Capana04g000017	266	K	xxxxxxxxxx_K_Rxxxxxxxxx
Capana06g002939	16	K	xxxxxxxxxx_K_Hxxxxxxxxx
Capana02g002928	294	K	xxxxxxxxxx_K_Rxxxxxxxxx
Capana04g000350	292	K	xxxxxxxxxx_K_Yxxxxxxxxx
Capana07g000032	557	K	xxxxxxxxxx_K_Yxxxxxxxxx
Capana08g002048	64	K	xxxxxxxxxx_K_Txxxxxxxxx
Capana10g000741	31	K	xxxxxxxxxx_K_Txxxxxxxxx
Capana02g003456	48	K	xxxxxxxxxx_K_Fxxxxxxxxx
Capana00g003783	61	K	xxxxxxxAxx_K_Pxxxxxxxxx
Capana09g001881	50	K	xxxxxxxxxx_K_Txxxxxxxxx
Capana09g000691	198	K	xxxxxxxxxx_K_Fxxxxxxxxx
Capana06g002690	285	K	xxxxxxxxxx_K_Sxxxxxxxxx
Capana07g002419	96	K	xxxxxxxxxx_K_Kxxxxxxxxx
Capana12g002820	81	K	xxxxxxxxxx_K_Kxxxxxxxxx
Capana03g000163	258	K	xxxxxxxxxx_K_Dxxxxxxxxx
Capana05g001394	107	K	xxxxxxxxxx_K_Rxxxxxxxxx
Capana05g002207	177	K	xxxxxxxxxx_K_xRxxxxxxxx
Capana06g001869	95	K	xxxxxxxxxx_K_xExxxxxxxx
Capana02g001443	247	K	xxxxxxxxxH_K_xxxxxxxxxx
Capana08g000045	123	K	xxxxxxxxxY_K_xxxxxxxxxx
Capana03g001931	36	K	xxxxxxxxxx_K_Fxxxxxxxxx
Capana05g002207	145	K	xxxxxxxxxx_K_Nxxxxxxxxx
Capana07g002132	775	K	xxxxxxxxxx_K_Hxxxxxxxxx
Capana04g000153	133	K	xxxxxxxxxx_K_Wxxxxxxxxx
Capana08g000545	722	K	xxxxxxxxxx_K_xRxxxxxxxx
Capana09g001086	232	K	xxxxxxxxxx_K_Yxxxxxxxxx
Capana09g000212	28	K	xxxxxxxxxY_K_xxxxxxxxxx
Capana04g000386	208	K	xxxxxxxxxx_K_Rxxxxxxxxx
Capana05g000044	110	K	xxxxxxxxxx_K_Sxxxxxxxxx
Capana06g000223	375	K	xxxxxxxxxx_K_Yxxxxxxxxx
Capana06g002939	53	K	xxxxxxxxxx_K_Yxxxxxxxxx
Capana03g003135	291	K	xxxxxxxxxx_K_Txxxxxxxxx
Capana11g001282	212	K	xxxxxxxxxT_K_xxxxxxxxxx
Capana11g001898	20	K	xxxxxxxxxx_K_KAxxxxxxxx
Capana00g001365	231	K	xxxxxxxxxY_K_xxxxxxxxxx
Capana04g001297	58	K	xxxxxxxxxx_K_Kxxxxxxxxx
Capana11g000039	57	K	xxxxxxxxxx_K_Sxxxxxxxxx
Capana06g000422	63	K	xxxxxxxxxx_K_Rxxxxxxxxx
Capana03g001940	15	K	xxxxxxxxxx_K_Hxxxxxxxxx
Capana12g002700	78	K	xxxxxxxxxx_K_xExxxxxxxx
Capana08g000356	127	K	xxxxxxxxxx_K_Sxxxxxxxxx
Capana11g002157	16	K	xxxxxxxxxx_K_Yxxxxxxxxx
Capana10g000187	292	K	xxxxxxxxxx_K_Hxxxxxxxxx
Capana04g000110	486	K	xxxxxxxxxx_K_Dxxxxxxxxx
Capana02g001694	242	K	xxxxxxxxxx_K_Sxxxxxxxxx
Capana07g000075	76	K	xxxxxxxxxx_K_Dxxxxxxxxx
Capana04g001378	268	K	xxxxxxxxxx_K_Nxxxxxxxxx
Capana00g002379	109	K	xxxxxxxxxx_K_Kxxxxxxxxx
Capana09g000010	62	K	xxxxxxxxxT_K_xxxxxxxxxx
Capana02g002522	788	K	xxxxxxxxxx_K_Rxxxxxxxxx
Capana04g002873	84	K	xxxxxxxxxx_K_Yxxxxxxxxx
Capana02g000067	370	K	xxxxxxxxxx_K_Txxxxxxxxx
Capana03g004441	120	K	xxxxxxxxHx_K_xxxxxxxxxx
Capana05g000916	146	K	xxxxxxxxxx_K_Kxxxxxxxxx
Capana01g002077	356	K	xxxxxxxxxx_K_Txxxxxxxxx
Capana12g000582	138	K	xxxxxxxxxx_K_Sxxxxxxxxx
Capana03g004091	322	K	xxxxxxxxxx_K_Nxxxxxxxxx
Capana04g000681	114	K	xxxxxxxxxx_K_Nxxxxxxxxx
Capana01g003103	308	K	xxxxxxxxxx_K_Kxxxxxxxxx
Capana07g000817	108	K	xxxxxxxxxT_K_xxxxxxxxxx
Capana04g002321	66	K	xxxxxxxxxx_K_Yxxxxxxxxx
Capana01g002025	503	K	xxxxxxxxxx_K_Rxxxxxxxxx
Capana03g001430	416	K	xxxxxxxxxx_K_Wxxxxxxxxx
Capana07g002003	118	K	xxxxxxxxxx_K_xExxxxxxxx
Capana08g001223	123	K	xxxxxxxxxY_K_xxxxxxxxxx
Capana02g002576	64	K	xxxxxxxxxx_K_Yxxxxxxxxx
Capana04g000494	279	K	xxxxxxxxxx_K_Yxxxxxxxxx
Capana00g005037	154	K	xxxxxxxxxx_K_Txxxxxxxxx
Capana02g002452	127	K	xxxxxxxxxx_K_Rxxxxxxxxx
Capana09g000956	4	K	xxxxxxxxxx_K_Hxxxxxxxxx
Capana06g001083	359	K	xxxxxxxxxx_K_Sxxxxxxxxx
Capana10g001856	364	K	xxxxxxxxxx_K_Txxxxxxxxx
Capana01g001616	102	K	xxxxxxxxxx_K_Hxxxxxxxxx
Capana04g001765	1425	K	xxxxxxxxxx_K_Nxxxxxxxxx
Capana01g002806	485	K	xxxxxxxxxY_K_xxxxxxxxxx
Capana05g001020	543	K	xxxxxxxxxx_K_xExxxxxxxx
Capana08g002187	283	K	xxxxxxxxxx_K_Dxxxxxxxxx
Capana09g001680	19	K	xxxxxxxxxx_K_Txxxxxxxxx
Capana08g000545	260	K	xxxxxxxxxx_K_Nxxxxxxxxx
Capana02g000067	396	K	xxxxxxxxxx_K_Kxxxxxxxxx
Capana01g002025	62	K	xxxxxxxxxx_K_Dxxxxxxxxx
Capana09g001479	155	K	xxxxxxxxxx_K_Rxxxxxxxxx
Capana00g002117	148	K	xxxxxxxxxx_K_Sxxxxxxxxx
Capana03g000791	319	K	xxxxxxxxxx_K_Rxxxxxxxxx
Capana06g000563	13	K	xxxxxxxxxx_K_Kxxxxxxxxx
Capana00g005036	122	K	xxxxxxxxxx_K_Dxxxxxxxxx
Capana06g000453	14	K	xxxxxxxxxx_K_Txxxxxxxxx
Capana07g001881	121	K	xxxxxxxxxx_K_Yxxxxxxxxx
Capana04g000669	15	K	xxxxxxxxxx_K_Nxxxxxxxxx
Capana12g000513	371	K	xxxxxxxxxx_K_Sxxxxxxxxx
Capana10g002060	115	K	xxxxxxxxHx_K_xxxxxxxxxx
Capana04g000123	361	K	xxxxxxxxxx_K_xRxxxxxxxx
Capana04g001038	39	K	xxxxxxxxxH_K_xxxxxxxxxx
Capana12g001779	111	K	xxxxxxxxxx_K_Rxxxxxxxxx
Capana03g001701	317	K	xxxxxxxxxx_K_Hxxxxxxxxx
Capana00g001096	137	K	xxxxxxxxxx_K_Dxxxxxxxxx
Capana10g001914	105	K	xxxxxxxxxx_K_Sxxxxxxxxx
Capana06g000563	14	K	xxxxxxxAxx_K_Pxxxxxxxxx
Capana07g001902	393	K	xxxxxxxxxx_K_Rxxxxxxxxx
Capana00g001018	610	K	xxxxxxxxxx_K_Rxxxxxxxxx
Capana07g001928	164	K	xxxxxxxxxx_K_Yxxxxxxxxx
Capana02g002219	362	K	xxxxxxxxxx_K_Nxxxxxxxxx
Capana04g001812	692	K	xxxxxxxxxx_K_xRxxxxxxxx
Capana02g002686	539	K	xxxxxxxxxx_K_Dxxxxxxxxx
Capana02g001498	214	K	xxxxxxxxxx_K_Fxxxxxxxxx
Capana02g001352	277	K	xxxxxxxxxx_K_Wxxxxxxxxx
Capana00g001213	217	K	xxxxxxxxxx_K_Hxxxxxxxxx
Capana05g000857	243	K	xxxxxxxxxx_K_Sxxxxxxxxx
Capana01g002007	138	K	xxxxxxxxxx_K_Dxxxxxxxxx
Capana08g001728	220	K	xxxxxxxxxx_K_Fxxxxxxxxx
Capana12g002572	292	K	xxxxxxxxxx_K_Hxxxxxxxxx
Capana12g001365	96	K	xxxxxxxxxx_K_Sxxxxxxxxx
Capana12g000479	471	K	xxxxxxxxxx_K_Dxxxxxxxxx
Capana08g002328	403	K	xxxxxxxxxx_K_Sxxxxxxxxx
Capana08g000825	263	K	xxxxxxxxxx_K_Hxxxxxxxxx
Capana03g000612	81	K	xxxxxxxxxx_K_Kxxxxxxxxx
Capana03g004084	464	K	xxxxxxxxxT_K_xxxxxxxxxx
Capana03g001399	307	K	xxxxxxxxxx_K_Yxxxxxxxxx
Capana06g000896	147	K	xxxxxxxxxx_K_Dxxxxxxxxx
Capana11g000573	22	K	xxxxxxxxxx_K_Dxxxxxxxxx
Capana03g002218	190	K	xxxxxxxxxx_K_Sxxxxxxxxx
Capana09g002276	95	K	xxxxxxxxxx_K_Hxxxxxxxxx
Capana12g002408	131	K	xxxxxxxxxx_K_Hxxxxxxxxx
Capana03g003217	8	K	xxxxxxxxxx_K_Kxxxxxxxxx
Capana08g002744	112	K	xxxxxxxxxx_K_xRxxxxxxxx
Capana04g001095	66	K	xxxxxxxxxx_K_Rxxxxxxxxx
Capana06g000402	747	K	xxxxxxxxxx_K_Dxxxxxxxxx
Capana08g001246	59	K	xxxxxxxxxx_K_Kxxxxxxxxx
Capana11g000118	88	K	xxxxxxxxxx_K_Hxxxxxxxxx
Capana04g000138	151	K	xxxxxxxxxx_K_Sxxxxxxxxx
Capana00g003269	130	K	xxxxxxxxxx_K_Hxxxxxxxxx
Capana01g001837	67	K	xxxxxxxxxx_K_Wxxxxxxxxx
Capana07g000991	111	K	xxxxxxxxxT_K_xxxxxxxxxx
Capana04g000274	74	K	xxxxxxxxxY_K_xxxxxxxxxx
Capana06g000223	61	K	xxxxxxxxHx_K_xxxxxxxxxx
Capana04g000951	103	K	xxxxxxxxxY_K_Nxxxxxxxxx
Capana07g002210	121	K	xxxxxxxxxx_K_Yxxxxxxxxx
Capana09g000706	14	K	xxxxxxxxxx_K_KAxxxxxxxx
Capana00g002547	269	K	xxxxxxxxxx_K_Txxxxxxxxx
Capana01g000144	8	K	xxxxxxxxxH_K_xxxxxxxxxx
Capana03g000028	124	K	xxxxxxxxxx_K_Fxxxxxxxxx
Capana06g002374	18	K	xxxxxxxxxx_K_Hxxxxxxxxx
Capana05g002539	226	K	xxxxxxxxxx_K_Kxxxxxxxxx
Capana12g000083	52	K	xxxxxxxxxx_K_Txxxxxxxxx
Capana08g001818	108	K	xxxxxxxxxx_K_Sxxxxxxxxx
Capana00g001461	232	K	xxxxxxxxxT_K_xxxxxxxxxx
Capana02g001195	31	K	xxxxxxxxxx_K_Yxxxxxxxxx
Capana03g001303	629	K	xxxxxxxxHx_K_xxxxxxxxxx
Capana12g002500	323	K	xxxxxxxxxx_K_Rxxxxxxxxx
Capana08g002393	118	K	xxxxxxxxxx_K_Wxxxxxxxxx
Capana01g002025	88	K	xxxxxxxxxx_K_xRxxxxxxxx
Capana07g002410	470	K	xxxxxxxxxx_K_KAxxxxxxxx
Capana08g002681	201	K	xxxxxxxxxx_K_Txxxxxxxxx
Capana07g002048	200	K	xxxxxxxxxx_K_Sxxxxxxxxx
Capana07g002256	170	K	xxxxxxxxxx_K_Sxxxxxxxxx
Capana10g002327	340	K	xxxxxxxxxH_K_xxxxxxxxxx
Capana12g001691	443	K	xxxxxxxxxx_K_Hxxxxxxxxx
Capana00g002259	184	K	xxxxxxxxxx_K_Yxxxxxxxxx
Capana01g001578	203	K	xxxxxxxxxx_K_Sxxxxxxxxx
Capana04g001008	90	K	xxxxxxxxxx_K_Sxxxxxxxxx
Capana01g000523	264	K	xxxxxxxxxT_K_xxxxxxxxxx
Capana08g000534	174	K	xxxxxxxxxx_K_xExxxxxxxx
Capana12g000407	333	K	xxxxxxxxxx_K_Sxxxxxxxxx
Capana09g002040	402	K	xxxxxxxxxx_K_Rxxxxxxxxx
Capana00g000816	238	K	xxxxxxxxxx_K_Fxxxxxxxxx
Capana05g000346	21	K	xxxxxxxxxx_K_KIxxxxxxxx
Capana12g000190	359	K	xxxxxxxxxx_K_Dxxxxxxxxx
Capana10g000104	42	K	xxxxxxxxxx_K_Hxxxxxxxxx
Capana00g003768	18	K	xxxxxxxxxY_K_xxxxxxxxxx
Capana03g000806	243	K	xxxxxxxxxx_K_Nxxxxxxxxx
Capana11g000038	160	K	xxxxxxxxHx_K_xxxxxxxxxx
Capana06g002690	364	K	xxxxxxxxxx_K_Kxxxxxxxxx
Capana01g000721	263	K	xxxxxxxxxx_K_Dxxxxxxxxx
Capana05g000123	166	K	xxxxxxxxxx_K_Hxxxxxxxxx
Capana06g001357	212	K	xxxxxxxxxx_K_Yxxxxxxxxx
Capana00g003268	117	K	xxxxxxxxxx_K_Hxxxxxxxxx
Capana07g000545	2263	K	xxxxxxxxxx_K_Hxxxxxxxxx
Capana08g002744	81	K	xxxxxxxxxx_K_Rxxxxxxxxx
Capana04g000290	114	K	xxxxxxxxxx_K_Hxxxxxxxxx
Capana10g002505	205	K	xxxxxxxxxx_K_Dxxxxxxxxx
Capana04g000345	225	K	xxxxxxxxxx_K_Hxxxxxxxxx
Capana12g001769	303	K	xxxxxxxxxx_K_Fxxxxxxxxx
Capana05g002198	502	K	xxxxxxxxxx_K_Sxxxxxxxxx
Capana00g002117	107	K	xxxxxxxxxx_K_Rxxxxxxxxx
Capana07g001803	404	K	xxxxxxxxxx_K_xRxxxxxxxx
Capana09g001688	98	K	xxxxxxxxxx_K_Sxxxxxxxxx
Capana05g001001	400	K	xxxxxxxxxx_K_Yxxxxxxxxx
Capana08g001677	125	K	xxxxxxxxxx_K_Yxxxxxxxxx
Capana06g001705	213	K	xxxxxxxxxx_K_Hxxxxxxxxx
Capana06g002039	21	K	xxxxxxxxxx_K_Hxxxxxxxxx
Capana05g001077	60	K	xxxxxxxxxY_K_Nxxxxxxxxx
Capana03g001016	118	K	xxxxxxxxxx_K_Wxxxxxxxxx
Capana10g002442	382	K	xxxxxxxxxx_K_Txxxxxxxxx
Capana03g000698	166	K	xxxxxxxxxY_K_xxxxxxxxxx
Capana01g003224	404	K	xxxxxxxxxx_K_Sxxxxxxxxx
Capana12g001317	89	K	xxxxxxxxxx_K_Txxxxxxxxx
Capana02g001833	269	K	xxxxxxxxxx_K_Nxxxxxxxxx
Capana02g002133	194	K	xxxxxxxxxx_K_Txxxxxxxxx
Capana03g002043	97	K	xxxxxxxxxx_K_Hxxxxxxxxx
Capana06g001677	165	K	xxxxxxxxxx_K_Dxxxxxxxxx
Capana12g000734	140	K	xxxxxxxxxx_K_Nxxxxxxxxx
Capana06g000226	59	K	xxxxxxxxxx_K_Rxxxxxxxxx
Capana02g000308	49	K	xxxxxxxxxx_K_Nxxxxxxxxx
Capana07g002010	126	K	xxxxxxxxxx_K_Kxxxxxxxxx
Capana10g001517	81	K	xxxxxxxxxx_K_Nxxxxxxxxx
Capana01g004201	141	K	xxxxxxxxxx_K_Txxxxxxxxx
Capana12g002146	13	K	xxxxxxxxxx_K_Yxxxxxxxxx
Capana04g001331	227	K	xxxxxxxxxx_K_Sxxxxxxxxx
Capana02g003641	89	K	xxxxxxxxxx_K_Yxxxxxxxxx
Capana08g002377	71	K	xxxxxxxxxx_K_Sxxxxxxxxx
Capana02g002219	321	K	xxxxxxxxxx_K_xRxxxxxxxx
Capana01g004028	132	K	xxxxxxxxxx_K_xExxxxxxxx
Capana00g001862	147	K	xxxxxxxxxx_K_KAxxxxxxxx
Capana07g001429	569	K	xxxxxxxxxx_K_Txxxxxxxxx
Capana03g004052	852	K	xxxxxxxxxT_K_xxxxxxxxxx
Capana03g000624	450	K	xxxxxxxxxx_K_Dxxxxxxxxx
Capana07g000961	132	K	xxxxxxxxxx_K_Nxxxxxxxxx
Capana11g000472	275	K	xxxxxxxxxY_K_xxxxxxxxxx
Capana04g001812	98	K	xxxxxxxxxx_K_Fxxxxxxxxx
Capana10g002250	380	K	xxxxxxxxxY_K_xxxxxxxxxx
Capana00g003212	57	K	xxxxxxxxxx_K_Nxxxxxxxxx
Capana07g002128	76	K	xxxxxxxxxT_K_xxxxxxxxxx
Capana03g001353	91	K	xxxxxxxxxx_K_Yxxxxxxxxx
Capana00g003770	164	K	xxxxxxxxxx_K_Sxxxxxxxxx
Capana00g000843	152	K	xxxxxxxxxx_K_Rxxxxxxxxx
Capana05g002104	91	K	xxxxxxxxxx_K_Fxxxxxxxxx
Capana01g003113	134	K	xxxxxxxxxx_K_Txxxxxxxxx
Capana08g001534	102	K	xxxxxxxxxx_K_Fxxxxxxxxx
Capana03g003135	281	K	xxxxxxxxxx_K_Dxxxxxxxxx
Capana03g000375	432	K	xxxxxxxxxx_K_Nxxxxxxxxx
Capana11g002356	174	K	xxxxxxxxxx_K_Rxxxxxxxxx
Capana05g002436	541	K	xxxxxxxxxx_K_Dxxxxxxxxx
Capana00g003130	193	K	xxxxxxxxxY_K_xxxxxxxxxx
Capana01g000961	171	K	xxxxxxxxxx_K_Dxxxxxxxxx
Capana03g000267	85	K	xxxxxxxxxx_K_Kxxxxxxxxx
Capana10g001362	49	K	xxxxxxxxxx_K_Dxxxxxxxxx
Capana08g000542	16	K	xxxxxxxxxx_K_Hxxxxxxxxx
Capana01g003049	327	K	xxxxxxxxxx_K_KAxxxxxxxx
Capana10g000104	348	K	xxxxxxxxxx_K_xExxxxxxxx
Capana06g001062	525	K	xxxxxxxxxx_K_Nxxxxxxxxx
Capana00g001096	74	K	xxxxxxxxxx_K_Sxxxxxxxxx
Capana09g002116	93	K	xxxxxxxxxx_K_xExxxxxxxx
Capana09g001881	67	K	xxxxxxxxxx_K_Hxxxxxxxxx
Capana06g002616	591	K	xxxxxxxxxx_K_Yxxxxxxxxx
Capana04g002873	155	K	xxxxxxxxxT_K_xxxxxxxxxx
Capana12g002102	86	K	xxxxxxxxxx_K_xExxxxxxxx
Capana05g001718	70	K	xxxxxxxxxx_K_Nxxxxxxxxx
Capana06g000548	125	K	xxxxxxxxxx_K_Sxxxxxxxxx
Capana03g000526	124	K	xxxxxxxxxx_K_Rxxxxxxxxx
Capana03g001722	135	K	xxxxxxxxxx_K_Hxxxxxxxxx
Capana12g002517	52	K	xxxxxxxxxx_K_Dxxxxxxxxx
Capana00g001213	240	K	xxxxxxxxxx_K_Rxxxxxxxxx
Capana02g001004	32	K	xxxxxxxxxx_K_Nxxxxxxxxx
Capana09g000655	229	K	xxxxxxxxxx_K_Nxxxxxxxxx
Capana12g000734	224	K	xxxxxxxxxx_K_Fxxxxxxxxx
Capana11g001632	324	K	xxxxxxxxxY_K_Nxxxxxxxxx
Capana10g001668	15	K	xxxxxxxxxx_K_Kxxxxxxxxx
Capana12g001543	137	K	xxxxxxxxxx_K_Sxxxxxxxxx
Capana06g001234	53	K	xxxxxxxxxx_K_Txxxxxxxxx
Capana04g000123	208	K	xxxxxxxxxx_K_Txxxxxxxxx
Capana08g002330	260	K	xxxxxxxxxx_K_Wxxxxxxxxx
Capana07g000048	20	K	xxxxxxxxxx_K_Txxxxxxxxx
Capana12g001061	1090	K	xxxxxxxxxx_K_Sxxxxxxxxx
Capana02g002219	37	K	xxxxxxxxxx_K_Txxxxxxxxx
Capana10g002122	106	K	xxxxxxxxxY_K_Nxxxxxxxxx
Capana03g002138	314	K	xxxxxxxxxx_K_Fxxxxxxxxx
Capana12g001722	97	K	xxxxxxxxxx_K_Rxxxxxxxxx
Capana08g001512	228	K	xxxxxxxxxx_K_xRxxxxxxxx
Capana00g003506	12	K	xxxxxxxxxx_K_Hxxxxxxxxx
Capana07g001985	285	K	xxxxxxxxxx_K_Rxxxxxxxxx
Capana08g000545	571	K	xxxxxxxxxx_K_Sxxxxxxxxx
Capana00g001018	402	K	xxxxxxxxxx_K_Fxxxxxxxxx
Capana02g003498	257	K	xxxxxxxxxx_K_Dxxxxxxxxx
Capana08g000502	108	K	xxxxxxxxxx_K_Txxxxxxxxx
Capana09g001864	115	K	xxxxxxxxxx_K_Rxxxxxxxxx
Capana06g001411	127	K	xxxxxxxxxx_K_Txxxxxxxxx
Capana06g000214	165	K	xxxxxxxxxx_K_Wxxxxxxxxx
Capana06g002042	11	K	xxxxxxxxxx_K_Rxxxxxxxxx
Capana03g002263	20	K	xxxxxxxxxx_K_Hxxxxxxxxx
Capana06g002778	10	K	xxxxxxxxxx_K_Fxxxxxxxxx
Capana02g000014	158	K	xxxxxxxxxT_K_xxxxxxxxxx
Capana08g001595	344	K	xxxxxxxxxT_K_xxxxxxxxxx
Capana01g003039	54	K	xxxxxxxxxT_K_xxxxxxxxxx
Capana04g001114	44	K	xxxxxxxxxx_K_Fxxxxxxxxx
Capana00g000867	120	K	xxxxxxxxxx_K_Txxxxxxxxx
Capana11g001898	146	K	xxxxxxxxxx_K_Kxxxxxxxxx
Capana03g004607	231	K	xxxxxxxxxx_K_Fxxxxxxxxx
Capana09g001350	391	K	xxxxxxxxxx_K_Yxxxxxxxxx
Capana04g002063	103	K	xxxxxxxxxx_K_Rxxxxxxxxx
Capana08g000069	1360	K	xxxxxxxxxx_K_Rxxxxxxxxx
Capana08g002568	168	K	xxxxxxxxxx_K_xExxxxxxxx
Capana05g001224	300	K	xxxxxxxxxx_K_Hxxxxxxxxx
Capana04g000274	752	K	xxxxxxxxxx_K_Nxxxxxxxxx
Capana11g001227	355	K	xxxxxxxxxx_K_xExxxxxxxx
Capana03g002476	86	K	xxxxxxxxxx_K_Hxxxxxxxxx
Capana07g001064	418	K	xxxxxxxxxx_K_Fxxxxxxxxx
Capana06g001357	99	K	xxxxxxxxxx_K_Kxxxxxxxxx
Capana09g002021	268	K	xxxxxxxxxx_K_Fxxxxxxxxx
Capana08g001009	325	K	xxxxxxxxxx_K_Rxxxxxxxxx
Capana10g000425	337	K	xxxxxxxxxx_K_Dxxxxxxxxx
Capana07g000079	137	K	xxxxxxxxxx_K_Hxxxxxxxxx
Capana08g002829	195	K	xxxxxxxxxY_K_xxxxxxxxxx
Capana05g002535	121	K	xxxxxxxxxx_K_Yxxxxxxxxx
Capana06g000995	396	K	xxxxxxxxxx_K_Rxxxxxxxxx
Capana00g002459	159	K	xxxxxxxxxx_K_Kxxxxxxxxx
Capana10g001856	222	K	xxxxxxxxxx_K_Yxxxxxxxxx
Capana11g000293	17	K	xxxxxxxxxx_K_Nxxxxxxxxx
Capana05g002104	105	K	xxxxxxxxxx_K_Nxxxxxxxxx
Capana01g001333	462	K	xxxxxxxxxx_K_Yxxxxxxxxx
Capana10g002130	422	K	xxxxxxxxxx_K_Txxxxxxxxx
Capana02g001973	550	K	xxxxxxxxxx_K_Dxxxxxxxxx
Capana07g001293	100	K	xxxxxxxxxx_K_Yxxxxxxxxx
Capana01g000037	131	K	xxxxxxxxxx_K_Fxxxxxxxxx
Capana09g002323	136	K	xxxxxxxxxx_K_Sxxxxxxxxx
Capana06g000116	140	K	xxxxxxxxxT_K_xxxxxxxxxx
Capana06g000973	334	K	xxxxxxxxHx_K_xxxxxxxxxx
Capana07g001146	233	K	xxxxxxxxxx_K_Fxxxxxxxxx
Capana10g001955	336	K	xxxxxxxxxx_K_Yxxxxxxxxx
Capana12g000006	239	K	xxxxxxxxxx_K_Dxxxxxxxxx
Capana09g002348	146	K	xxxxxxxxxx_K_Kxxxxxxxxx
Capana06g001071	63	K	xxxxxxxxxx_K_Kxxxxxxxxx
Capana06g001728	261	K	xxxxxxxxxx_K_Fxxxxxxxxx
Capana08g002730	265	K	xxxxxxxxHx_K_xxxxxxxxxx
Capana10g000326	216	K	xxxxxxxxxx_K_Nxxxxxxxxx
Capana12g001493	83	K	xxxxxxxxxx_K_xExxxxxxxx
Capana04g001328	134	K	xxxxxxxxxx_K_Sxxxxxxxxx
Capana06g001108	339	K	xxxxxxxxxT_K_xxxxxxxxxx
Capana01g000843	166	K	xxxxxxxxxY_K_Nxxxxxxxxx
Capana00g004374	131	K	xxxxxxxxxx_K_Rxxxxxxxxx
Capana07g002128	132	K	xxxxxxxxHx_K_xxxxxxxxxx
Capana12g000407	182	K	xxxxxxxxxx_K_Txxxxxxxxx
Capana12g001382	195	K	xxxxxxxxxx_K_Nxxxxxxxxx
Capana08g001818	595	K	xxxxxxxxxx_K_Nxxxxxxxxx
Capana11g000039	162	K	xxxxxxxxxx_K_Kxxxxxxxxx
Capana08g002681	254	K	xxxxxxxxxx_K_Nxxxxxxxxx
Capana06g001395	50	K	xxxxxxxxxx_K_KIxxxxxxxx
Capana07g001205	284	K	xxxxxxxxxx_K_Yxxxxxxxxx
Capana05g000078	150	K	xxxxxxxxxx_K_Sxxxxxxxxx
Capana03g000624	370	K	xxxxxxxxxx_K_Sxxxxxxxxx
Capana04g000138	211	K	xxxxxxxxxx_K_Hxxxxxxxxx
Capana12g002101	159	K	xxxxxxxxxx_K_Txxxxxxxxx
Capana03g000047	570	K	xxxxxxxxxx_K_Yxxxxxxxxx
Capana08g002393	251	K	xxxxxxxxxx_K_Wxxxxxxxxx
Capana07g002457	74	K	xxxxxxxxxx_K_Yxxxxxxxxx
Capana02g001935	262	K	xxxxxxxxxH_K_xxxxxxxxxx
Capana03g000068	473	K	xxxxxxxxxx_K_xRxxxxxxxx
Capana08g002319	43	K	xxxxxxxxxx_K_Fxxxxxxxxx
Capana06g000923	124	K	xxxxxxxxxx_K_Yxxxxxxxxx
Capana03g002677	316	K	xxxxxxxxxx_K_Wxxxxxxxxx
Capana03g004641	126	K	xxxxxxxxxx_K_Dxxxxxxxxx
Capana07g002393	613	K	xxxxxxxxxx_K_Txxxxxxxxx
Capana02g003132	180	K	xxxxxxxxxx_K_Fxxxxxxxxx
Capana02g002258	181	K	xxxxxxxxxx_K_Rxxxxxxxxx
Capana03g000556	28	K	xxxxxxxxxx_K_Nxxxxxxxxx
Capana12g002223	1110	K	xxxxxxxxxx_K_Nxxxxxxxxx
Capana11g001282	33	K	xxxxxxxxxx_K_Nxxxxxxxxx
Capana08g000412	437	K	xxxxxxxxxx_K_Sxxxxxxxxx
Capana11g001904	612	K	xxxxxxxxxx_K_Txxxxxxxxx
Capana02g001016	81	K	xxxxxxxxxx_K_Nxxxxxxxxx
Capana10g001526	26	K	xxxxxxxxxx_K_Kxxxxxxxxx
Capana12g002808	81	K	xxxxxxxxxx_K_Nxxxxxxxxx
Capana05g002314	544	K	xxxxxxxxxx_K_Nxxxxxxxxx
Capana06g002042	9	K	xxxxxxxxxx_K_Txxxxxxxxx
Capana00g004560	343	K	xxxxxxxxxx_K_Rxxxxxxxxx
Capana03g000267	114	K	xxxxxxxxxx_K_Yxxxxxxxxx
Capana06g002615	359	K	xxxxxxxxxx_K_Sxxxxxxxxx
Capana00g004931	42	K	xxxxxxxxxx_K_KAxxxxxxxx
Capana09g002231	65	K	xxxxxxxxxx_K_KAxxxxxxxx
Capana06g001411	5	K	xxxxxxxxxx_K_Fxxxxxxxxx
Capana00g003043	412	K	xxxxxxxxxx_K_Rxxxxxxxxx
Capana07g002111	124	K	xxxxxxxxxx_K_xRxxxxxxxx
Capana00g003958	177	K	xxxxxxxxxx_K_Nxxxxxxxxx
Capana01g001997	132	K	xxxxxxxxxx_K_Fxxxxxxxxx
Capana07g000230	30	K	xxxxxxxxxx_K_Yxxxxxxxxx
Capana07g000191	137	K	xxxxxxxxxx_K_xExxxxxxxx
Capana00g004374	55	K	xxxxxxxxxx_K_Hxxxxxxxxx
Capana07g001814	140	K	xxxxxxxxxx_K_Rxxxxxxxxx
Capana04g000333	110	K	xxxxxxxxxx_K_Sxxxxxxxxx
Capana06g002690	417	K	xxxxxxxxxx_K_Sxxxxxxxxx
Capana01g002717	504	K	xxxxxxxxxx_K_Wxxxxxxxxx
Capana06g002116	136	K	xxxxxxxxxx_K_Rxxxxxxxxx
Capana03g002552	356	K	xxxxxxxxxx_K_Fxxxxxxxxx
Capana01g002684	99	K	xxxxxxxxxx_K_Yxxxxxxxxx
Capana04g001245	240	K	xxxxxxxxxx_K_Rxxxxxxxxx
Capana05g002269	94	K	xxxxxxxxxH_K_xxxxxxxxxx
Capana00g003486	276	K	xxxxxxxxxx_K_Wxxxxxxxxx
Capana01g003759	177	K	xxxxxxxxxx_K_Fxxxxxxxxx
Capana12g002318	349	K	xxxxxxxxxx_K_Rxxxxxxxxx
Capana01g001226	135	K	xxxxxxxxxx_K_Nxxxxxxxxx
Capana09g001878	311	K	xxxxxxxxxx_K_Kxxxxxxxxx
Capana01g001578	215	K	xxxxxxxxxx_K_Rxxxxxxxxx
Capana12g002137	331	K	xxxxxxxxxx_K_Rxxxxxxxxx
Capana09g001785	303	K	xxxxxxxxxx_K_Fxxxxxxxxx
Capana10g001389	288	K	xxxxxxxxxx_K_Wxxxxxxxxx
Capana04g000885	81	K	xxxxxxxxxx_K_xExxxxxxxx
Capana11g002222	145	K	xxxxxxxxxx_K_Sxxxxxxxxx
Capana08g001533	96	K	xxxxxxxxxx_K_Nxxxxxxxxx
Capana05g002405	103	K	xxxxxxxxxx_K_Txxxxxxxxx
Capana08g002643	57	K	xxxxxxxxxx_K_Fxxxxxxxxx
Capana04g000257	46	K	xxxxxxxxxx_K_Rxxxxxxxxx
Capana01g003662	107	K	xxxxxxxxxx_K_Kxxxxxxxxx
Capana08g002351	14	K	xxxxxxxxxx_K_Hxxxxxxxxx
Capana03g001767	91	K	xxxxxxxxxx_K_Nxxxxxxxxx
Capana05g001116	423	K	xxxxxxxxxx_K_Txxxxxxxxx
Capana11g000661	47	K	xxxxxxxxxx_K_Hxxxxxxxxx
Capana04g000276	325	K	xxxxxxxxxx_K_Nxxxxxxxxx
Capana08g000343	490	K	xxxxxxxxxx_K_Rxxxxxxxxx
Capana03g000079	91	K	xxxxxxxxxx_K_Yxxxxxxxxx
Capana00g001117	146	K	xxxxxxxxHx_K_xxxxxxxxxx
Capana01g000505	219	K	xxxxxxxxxx_K_Yxxxxxxxxx
Capana10g002424	143	K	xxxxxxxxxx_K_Rxxxxxxxxx
Capana00g002959	131	K	xxxxxxxxxx_K_xRxxxxxxxx
Capana02g001575	67	K	xxxxxxxxxx_K_Sxxxxxxxxx
Capana08g000907	407	K	xxxxxxxxxx_K_Rxxxxxxxxx
Capana02g001264	720	K	xxxxxxxxxx_K_Sxxxxxxxxx
Capana00g004772	28	K	xxxxxxxxxx_K_Sxxxxxxxxx
Capana11g002133	586	K	xxxxxxxxxx_K_Rxxxxxxxxx
Capana10g000033	58	K	xxxxxxxxHx_K_xxxxxxxxxx
Capana02g002926	142	K	xxxxxxxxxx_K_xExxxxxxxx
Capana06g001719	56	K	xxxxxxxxxx_K_Sxxxxxxxxx
Capana08g000222	206	K	xxxxxxxxxx_K_Rxxxxxxxxx
Capana02g002219	387	K	xxxxxxxxxx_K_Sxxxxxxxxx
Capana05g001718	83	K	xxxxxxxxxx_K_Rxxxxxxxxx
Capana11g000464	66	K	xxxxxxxxxx_K_Wxxxxxxxxx
Capana00g004500	14	K	xxxxxxxxxx_K_Dxxxxxxxxx
Capana03g001022	144	K	xxxxxxxxxx_K_Sxxxxxxxxx
Capana08g002681	311	K	xxxxxxxxxx_K_Kxxxxxxxxx
Capana09g002423	40	K	xxxxxxxxxx_K_Sxxxxxxxxx
Capana07g001287	614	K	xxxxxxxxxx_K_Kxxxxxxxxx
Capana00g002379	84	K	xxxxxxxxxx_K_Kxxxxxxxxx
Capana01g000516	206	K	xxxxxxxxxx_K_Yxxxxxxxxx
Capana07g001847	21	K	xxxxxxxxxx_K_Sxxxxxxxxx
Capana08g002575	157	K	xxxxxxxxxx_K_Txxxxxxxxx
Capana05g001718	41	K	xxxxxxxxxx_K_Yxxxxxxxxx
Capana11g000131	101	K	xxxxxxxxxx_K_Rxxxxxxxxx
Capana08g002513	542	K	xxxxxxxxxx_K_Dxxxxxxxxx
Capana07g000951	25	K	xxxxxxxxxx_K_Fxxxxxxxxx
Capana01g001869	96	K	xxxxxxxxxx_K_Fxxxxxxxxx
Capana01g001148	83	K	xxxxxxxxxx_K_Fxxxxxxxxx
Capana04g001093	149	K	xxxxxxxxxY_K_xxxxxxxxxx
Capana08g001910	1357	K	xxxxxxxxxx_K_Nxxxxxxxxx
Capana10g000079	221	K	xxxxxxxxxx_K_Kxxxxxxxxx
Capana06g000553	14	K	xxxxxxxxxx_K_Kxxxxxxxxx
Capana10g001389	337	K	xxxxxxxxxx_K_Rxxxxxxxxx
Capana08g002759	32	K	xxxxxxxxxx_K_Yxxxxxxxxx
Capana01g000571	67	K	xxxxxxxxxx_K_Fxxxxxxxxx
Capana09g000691	218	K	xxxxxxxxxx_K_Rxxxxxxxxx
Capana11g002356	232	K	xxxxxxxxxx_K_Nxxxxxxxxx
Capana05g001871	31	K	xxxxxxxxxx_K_Txxxxxxxxx
Capana08g002241	560	K	xxxxxxxxxx_K_Rxxxxxxxxx
Capana06g001172	630	K	xxxxxxxxxx_K_Rxxxxxxxxx
Capana03g002906	255	K	xxxxxxxxxx_K_Hxxxxxxxxx
Capana11g000555	118	K	xxxxxxxxxx_K_Sxxxxxxxxx
Capana02g002921	15	K	xxxxxxxxxY_K_Nxxxxxxxxx
Capana10g000065	333	K	xxxxxxxxxT_K_xxxxxxxxxx
Capana01g001079	196	K	xxxxxxxxxx_K_xRxxxxxxxx
Capana12g000665	730	K	xxxxxxxxxx_K_Rxxxxxxxxx
Capana09g002441	213	K	xxxxxxxxxx_K_Hxxxxxxxxx
Capana06g001007	347	K	xxxxxxxxxx_K_Sxxxxxxxxx
Capana01g001230	92	K	xxxxxxxxxx_K_Yxxxxxxxxx
Capana02g003379	311	K	xxxxxxxxxx_K_Yxxxxxxxxx
Capana02g003489	195	K	xxxxxxxxxx_K_Txxxxxxxxx
Capana09g002017	119	K	xxxxxxxxxx_K_KIxxxxxxxx
Capana06g002575	30	K	xxxxxxxxxY_K_xxxxxxxxxx
Capana01g003217	7	K	xxxxxxxxxx_K_Txxxxxxxxx
Capana02g002642	425	K	xxxxxxxxxx_K_Yxxxxxxxxx
Capana02g001336	274	K	xxxxxxxxxx_K_Rxxxxxxxxx
Capana10g000309	141	K	xxxxxxxxxx_K_Sxxxxxxxxx
Capana11g000338	139	K	xxxxxxxxxx_K_Fxxxxxxxxx
Capana10g000222	464	K	xxxxxxxxxx_K_Yxxxxxxxxx
Capana02g002686	594	K	xxxxxxxxxx_K_Hxxxxxxxxx
Capana10g000802	36	K	xxxxxxxxxx_K_Fxxxxxxxxx
Capana01g000509	439	K	xxxxxxxxxT_K_xxxxxxxxxx
Capana05g001871	137	K	xxxxxxxxxx_K_Rxxxxxxxxx
Capana03g000190	75	K	xxxxxxxxxx_K_xExxxxxxxx
Capana07g002132	760	K	xxxxxxxxxx_K_Sxxxxxxxxx
Capana01g001041	284	K	xxxxxxxxxx_K_Kxxxxxxxxx
Capana06g002616	579	K	xxxxxxxxxx_K_Fxxxxxxxxx
Capana01g001553	245	K	xxxxxxxxxx_K_Sxxxxxxxxx
Capana03g001395	671	K	xxxxxxxxxx_K_Nxxxxxxxxx
Capana07g001559	735	K	xxxxxxxxxx_K_Dxxxxxxxxx
Capana06g000931	67	K	xxxxxxxxxx_K_Fxxxxxxxxx
Capana02g000339	444	K	xxxxxxxxxx_K_Txxxxxxxxx
Capana04g000327	267	K	xxxxxxxxxx_K_xExxxxxxxx
Capana05g002330	429	K	xxxxxxxxxx_K_Kxxxxxxxxx
Capana06g001357	100	K	xxxxxxxxxx_K_Yxxxxxxxxx
Capana03g002401	96	K	xxxxxxxxxx_K_Rxxxxxxxxx
Capana06g000659	311	K	xxxxxxxxxx_K_Yxxxxxxxxx
Capana07g001127	201	K	xxxxxxxxxx_K_Rxxxxxxxxx
Capana00g003194	382	K	xxxxxxxxxx_K_Fxxxxxxxxx
Capana11g002133	572	K	xxxxxxxxxx_K_Fxxxxxxxxx
Capana00g004435	46	K	xxxxxxxxxx_K_Hxxxxxxxxx
Capana06g002727	56	K	xxxxxxxxxx_K_Sxxxxxxxxx
Capana06g000728	190	K	xxxxxxxxxx_K_xExxxxxxxx
Capana07g001239	693	K	xxxxxxxxxx_K_Kxxxxxxxxx
Capana00g003770	136	K	xxxxxxxxxx_K_Kxxxxxxxxx
Capana02g003303	296	K	xxxxxxxxxx_K_Kxxxxxxxxx
Capana07g001292	67	K	xxxxxxxxxx_K_Hxxxxxxxxx
Capana03g002135	81	K	xxxxxxxxxx_K_Rxxxxxxxxx
Capana06g001178	171	K	xxxxxxxxxx_K_Sxxxxxxxxx
Capana03g000185	169	K	xxxxxxxxxx_K_Hxxxxxxxxx
Capana07g001429	565	K	xxxxxxxxHx_K_xxxxxxxxxx
Capana07g002111	457	K	xxxxxxxxxx_K_Kxxxxxxxxx
Capana12g001312	32	K	xxxxxxxxxx_K_Rxxxxxxxxx
Capana11g000242	246	K	xxxxxxxxxx_K_Hxxxxxxxxx
Capana04g000494	275	K	xxxxxxxxxx_K_xExxxxxxxx
Capana07g000073	95	K	xxxxxxxxxx_K_xRxxxxxxxx
Capana01g000177	95	K	xxxxxxxxxT_K_xxxxxxxxxx
Capana08g000873	160	K	xxxxxxxxxx_K_Hxxxxxxxxx
Capana10g000190	200	K	xxxxxxxxxx_K_Dxxxxxxxxx
Capana01g001190	47	K	xxxxxxxxxx_K_Fxxxxxxxxx
Capana04g000274	1018	K	xxxxxxxxxx_K_Fxxxxxxxxx
Capana12g002879	620	K	xxxxxxxxxx_K_Hxxxxxxxxx
Capana01g003417	826	K	xxxxxxxxxx_K_Hxxxxxxxxx
Capana04g000213	352	K	xxxxxxxxxx_K_Txxxxxxxxx
Capana12g002224	172	K	xxxxxxxxxx_K_Yxxxxxxxxx
Capana01g003185	66	K	xxxxxxxxxx_K_Dxxxxxxxxx
Capana12g000480	175	K	xxxxxxxxxx_K_Yxxxxxxxxx
Capana06g002076	138	K	xxxxxxxxxx_K_Hxxxxxxxxx
Capana03g000791	286	K	xxxxxxxxxx_K_Fxxxxxxxxx
Capana00g002879	134	K	xxxxxxxxxx_K_Yxxxxxxxxx
Capana00g004800	82	K	xxxxxxxxxx_K_Txxxxxxxxx
Capana04g002783	150	K	xxxxxxxxHx_K_xxxxxxxxxx
Capana08g002330	150	K	xxxxxxxxxx_K_Nxxxxxxxxx
Capana04g001265	80	K	xxxxxxxxxx_K_Hxxxxxxxxx
Capana08g001316	306	K	xxxxxxxxxx_K_Kxxxxxxxxx
Capana03g000601	156	K	xxxxxxxxxx_K_Hxxxxxxxxx
Capana00g004313	198	K	xxxxxxxxxx_K_Wxxxxxxxxx
Capana03g004607	48	K	xxxxxxxxxx_K_Txxxxxxxxx
Capana11g000598	330	K	xxxxxxxxxx_K_Hxxxxxxxxx
Capana01g000717	151	K	xxxxxxxxxY_K_Nxxxxxxxxx
Capana00g002861	292	K	xxxxxxxxxx_K_Hxxxxxxxxx
Capana00g002266	86	K	xxxxxxxxxY_K_xxxxxxxxxx
Capana10g002167	158	K	xxxxxxxxxx_K_xRxxxxxxxx
Capana06g002575	431	K	xxxxxxxxxx_K_Kxxxxxxxxx
Capana00g001154	504	K	xxxxxxxxxx_K_Rxxxxxxxxx
Capana10g001406	83	K	xxxxxxxxxx_K_Dxxxxxxxxx
Capana09g002432	352	K	xxxxxxxxxx_K_Nxxxxxxxxx
Capana01g003521	243	K	xxxxxxxxxx_K_KIxxxxxxxx
Capana02g002207	161	K	xxxxxxxxxx_K_Hxxxxxxxxx
Capana04g002873	229	K	xxxxxxxxxx_K_Rxxxxxxxxx
Capana04g002823	370	K	xxxxxxxxxx_K_Txxxxxxxxx
Capana01g000961	417	K	xxxxxxxxHx_K_xxxxxxxxxx
Capana08g002241	512	K	xxxxxxxxxx_K_Sxxxxxxxxx
Capana05g001003	288	K	xxxxxxxxxx_K_Hxxxxxxxxx
Capana07g002059	253	K	xxxxxxxxxx_K_Kxxxxxxxxx
Capana09g001087	150	K	xxxxxxxxxx_K_Yxxxxxxxxx
Capana03g001338	16	K	xxxxxxxxxx_K_Kxxxxxxxxx
Capana06g003058	180	K	xxxxxxxxxT_K_xxxxxxxxxx
Capana05g001001	585	K	xxxxxxxxxY_K_xxxxxxxxxx
Capana08g002146	241	K	xxxxxxxxxY_K_xxxxxxxxxx
Capana06g001178	380	K	xxxxxxxxxx_K_Yxxxxxxxxx
Capana00g002459	150	K	xxxxxxxxxx_K_xExxxxxxxx
Capana09g000212	77	K	xxxxxxxxxx_K_Hxxxxxxxxx
Capana07g001493	296	K	xxxxxxxxxx_K_Rxxxxxxxxx
Capana05g000857	255	K	xxxxxxxxxx_K_KAxxxxxxxx
Capana06g001736	273	K	xxxxxxxxxx_K_Fxxxxxxxxx
Capana03g003820	54	K	xxxxxxxxxx_K_KIxxxxxxxx
Capana06g000721	370	K	xxxxxxxxxx_K_Yxxxxxxxxx
Capana06g002575	36	K	xxxxxxxxxx_K_Rxxxxxxxxx
Capana09g002037	274	K	xxxxxxxxxx_K_Yxxxxxxxxx
Capana09g001865	667	K	xxxxxxxxxx_K_Yxxxxxxxxx
Capana09g001928	500	K	xxxxxxxxxx_K_Nxxxxxxxxx
Capana04g000550	157	K	xxxxxxxxxx_K_KIxxxxxxxx
Capana01g000521	402	K	xxxxxxxxxx_K_Wxxxxxxxxx
Capana12g000377	95	K	xxxxxxxxxx_K_Fxxxxxxxxx
Capana08g002396	305	K	xxxxxxxxxx_K_Fxxxxxxxxx
Capana07g001429	515	K	xxxxxxxxxx_K_Fxxxxxxxxx
Capana08g002563	62	K	xxxxxxxxxx_K_Sxxxxxxxxx
Capana09g002402	53	K	xxxxxxxxxx_K_Yxxxxxxxxx
Capana10g000781	85	K	xxxxxxxxxx_K_Wxxxxxxxxx
Capana03g001397	970	K	xxxxxxxxxx_K_Fxxxxxxxxx
Capana12g001007	37	K	xxxxxxxxxx_K_Txxxxxxxxx
Capana06g000725	124	K	xxxxxxxxxx_K_Fxxxxxxxxx
Capana06g001007	57	K	xxxxxxxxxx_K_Wxxxxxxxxx
Capana06g002575	227	K	xxxxxxxxxx_K_Rxxxxxxxxx
Capana08g000545	255	K	xxxxxxxxxx_K_Kxxxxxxxxx
Capana09g000773	172	K	xxxxxxxxxx_K_Fxxxxxxxxx
Capana12g001312	725	K	xxxxxxxxxx_K_Fxxxxxxxxx
Capana12g001353	343	K	xxxxxxxxxx_K_Kxxxxxxxxx
Capana06g001609	75	K	xxxxxxxxxx_K_Sxxxxxxxxx
Capana08g002729	83	K	xxxxxxxxxx_K_Sxxxxxxxxx
Capana06g000309	165	K	xxxxxxxxxx_K_Fxxxxxxxxx
Capana04g001650	46	K	xxxxxxxxxx_K_Nxxxxxxxxx
Capana04g000324	95	K	xxxxxxxxxx_K_Fxxxxxxxxx
Capana10g000296	41	K	xxxxxxxxxx_K_xRxxxxxxxx
Capana01g001805	434	K	xxxxxxxxxx_K_Yxxxxxxxxx
Capana01g004373	125	K	xxxxxxxxxx_K_Nxxxxxxxxx
Capana12g000479	813	K	xxxxxxxxxx_K_Rxxxxxxxxx
Capana02g002877	311	K	xxxxxxxxxx_K_Dxxxxxxxxx
Capana02g000541	148	K	xxxxxxxxxx_K_KAxxxxxxxx
Capana11g002226	141	K	xxxxxxxxxY_K_xxxxxxxxxx
Capana07g000771	135	K	xxxxxxxxxx_K_Nxxxxxxxxx
Capana10g000264	85	K	xxxxxxxxxx_K_Fxxxxxxxxx
Capana12g000242	419	K	xxxxxxxxxx_K_Yxxxxxxxxx
Capana00g003295	75	K	xxxxxxxxxY_K_xxxxxxxxxx
Capana03g004084	340	K	xxxxxxxxxx_K_Nxxxxxxxxx
Capana01g002860	330	K	xxxxxxxxxT_K_xxxxxxxxxx
Capana03g000180	669	K	xxxxxxxxxx_K_Kxxxxxxxxx
Capana04g001161	68	K	xxxxxxxxxx_K_Nxxxxxxxxx
Capana03g000094	199	K	xxxxxxxxxx_K_Kxxxxxxxxx
Capana00g001306	239	K	xxxxxxxxxx_K_Hxxxxxxxxx
Capana07g002304	186	K	xxxxxxxxxx_K_Hxxxxxxxxx
Capana03g000054	542	K	xxxxxxxxxx_K_Yxxxxxxxxx
Capana01g004129	177	K	xxxxxxxxxx_K_Txxxxxxxxx
Capana05g002540	176	K	xxxxxxxxxx_K_Kxxxxxxxxx
Capana01g001681	53	K	xxxxxxxxxx_K_xRxxxxxxxx
Capana03g002198	52	K	xxxxxxxxxY_K_xxxxxxxxxx
Capana08g002723	118	K	xxxxxxxxxx_K_Yxxxxxxxxx
Capana10g002442	305	K	xxxxxxxxxx_K_Yxxxxxxxxx
Capana09g001960	140	K	xxxxxxxxxx_K_Sxxxxxxxxx
Capana05g000599	234	K	xxxxxxxxxx_K_Fxxxxxxxxx
Capana11g000573	95	K	xxxxxxxxxx_K_Dxxxxxxxxx
Capana09g002427	209	K	xxxxxxxxxx_K_Sxxxxxxxxx
Capana02g002252	104	K	xxxxxxxxxx_K_Fxxxxxxxxx
Capana06g001748	42	K	xxxxxxxxxx_K_Fxxxxxxxxx
Capana06g001071	64	K	xxxxxxxxxx_K_Yxxxxxxxxx
Capana00g002007	347	K	xxxxxxxxxx_K_Yxxxxxxxxx
Capana11g002133	56	K	xxxxxxxxxx_K_Wxxxxxxxxx
Capana12g002019	38	K	xxxxxxxxxx_K_Txxxxxxxxx
Capana07g000351	134	K	xxxxxxxxxx_K_Txxxxxxxxx
Capana12g000501	22	K	xxxxxxxxxx_K_Yxxxxxxxxx
Capana11g000087	183	K	xxxxxxxxxx_K_xRxxxxxxxx
Capana04g001329	561	K	xxxxxxxxxx_K_Sxxxxxxxxx
Capana04g001281	130	K	xxxxxxxxxx_K_Yxxxxxxxxx
Capana04g001289	17	K	xxxxxxxxHx_K_xxxxxxxxxx
Capana04g002318	148	K	xxxxxxxxxY_K_Nxxxxxxxxx
Capana03g003135	272	K	xxxxxxxxxx_K_KIxxxxxxxx
Capana08g000663	218	K	xxxxxxxxxx_K_Rxxxxxxxxx
Capana00g004560	218	K	xxxxxxxxxx_K_Rxxxxxxxxx
Capana04g000255	116	K	xxxxxxxxxx_K_Nxxxxxxxxx
Capana08g002730	107	K	xxxxxxxxxx_K_Yxxxxxxxxx
Capana08g002012	95	K	xxxxxxxxxx_K_Wxxxxxxxxx
Capana03g000227	259	K	xxxxxxxxxx_K_KIxxxxxxxx
Capana05g002547	74	K	xxxxxxxxxx_K_Rxxxxxxxxx
Capana00g000314	39	K	xxxxxxxxxx_K_xRxxxxxxxx
Capana01g003044	56	K	xxxxxxxxxx_K_Hxxxxxxxxx
Capana08g000060	2	K	xxxxxxxxxx_K_Txxxxxxxxx
Capana11g000555	135	K	xxxxxxxxxx_K_Kxxxxxxxxx
Capana02g001645	549	K	xxxxxxxxxx_K_Txxxxxxxxx
Capana10g002385	115	K	xxxxxxxxxx_K_Txxxxxxxxx
Capana08g000015	170	K	xxxxxxxxxx_K_xExxxxxxxx
Capana06g001884	939	K	xxxxxxxxxY_K_Nxxxxxxxxx
Capana11g000681	256	K	xxxxxxxxxx_K_xRxxxxxxxx
Capana06g002727	45	K	xxxxxxxxxx_K_Rxxxxxxxxx
Capana08g002169	123	K	xxxxxxxxxx_K_Rxxxxxxxxx
Capana02g003173	151	K	xxxxxxxxxx_K_Nxxxxxxxxx
Capana12g002102	372	K	xxxxxxxxxx_K_Yxxxxxxxxx
Capana00g005036	887	K	xxxxxxxxxx_K_Rxxxxxxxxx
Capana08g001048	282	K	xxxxxxxxxx_K_Nxxxxxxxxx
Capana06g001953	195	K	xxxxxxxxxx_K_Txxxxxxxxx
Capana02g002206	63	K	xxxxxxxxxx_K_Fxxxxxxxxx
Capana00g002006	40	K	xxxxxxxxxx_K_Fxxxxxxxxx
Capana03g003512	53	K	xxxxxxxxxx_K_Rxxxxxxxxx
Capana05g002474	4	K	xxxxxxxxxx_K_xExxxxxxxx
Capana12g000677	36	K	xxxxxxxxxH_K_xxxxxxxxxx
Capana08g001043	190	K	xxxxxxxxxx_K_Nxxxxxxxxx
Capana08g002444	239	K	xxxxxxxxxx_K_Sxxxxxxxxx
Capana00g005036	916	K	xxxxxxxxxH_K_xxxxxxxxxx
Capana12g001312	251	K	xxxxxxxxxY_K_xxxxxxxxxx
Capana05g002235	351	K	xxxxxxxxxx_K_Nxxxxxxxxx
Capana09g002238	291	K	xxxxxxxxxx_K_Sxxxxxxxxx
Capana06g002561	63	K	xxxxxxxxxx_K_Txxxxxxxxx
Capana01g002025	397	K	xxxxxxxxxx_K_Rxxxxxxxxx
Capana11g000044	235	K	xxxxxxxxxx_K_Sxxxxxxxxx
Capana02g002196	943	K	xxxxxxxxxx_K_Hxxxxxxxxx
Capana02g001264	144	K	xxxxxxxxxx_K_Fxxxxxxxxx
Capana01g001363	161	K	xxxxxxxxxY_K_xxxxxxxxxx
Capana01g002411	204	K	xxxxxxxxxx_K_xExxxxxxxx
Capana10g000251	276	K	xxxxxxxxxx_K_Nxxxxxxxxx
Capana00g004429	80	K	xxxxxxxxxx_K_Sxxxxxxxxx
Capana06g000995	588	K	xxxxxxxxxx_K_KAxxxxxxxx
Capana07g001189	374	K	xxxxxxxxxx_K_Hxxxxxxxxx
Capana05g001871	190	K	xxxxxxxxxx_K_Nxxxxxxxxx
Capana02g001187	98	K	xxxxxxxxxx_K_Txxxxxxxxx
Capana01g003736	214	K	xxxxxxxxxx_K_Nxxxxxxxxx
Capana07g001716	295	K	xxxxxxxxxx_K_Nxxxxxxxxx
Capana01g003927	207	K	xxxxxxxxxx_K_Wxxxxxxxxx
Capana07g002144	272	K	xxxxxxxxxx_K_Hxxxxxxxxx
Capana08g002144	249	K	xxxxxxxxHx_K_xxxxxxxxxx
Capana08g000096	70	K	xxxxxxxxxx_K_Nxxxxxxxxx
Capana11g002151	391	K	xxxxxxxxxx_K_Fxxxxxxxxx
Capana08g002795	133	K	xxxxxxxxxx_K_Rxxxxxxxxx
Capana01g000041	366	K	xxxxxxxxxx_K_Yxxxxxxxxx
Capana01g003407	12	K	xxxxxxxxxx_K_Kxxxxxxxxx
Capana09g002142	24	K	xxxxxxxxxx_K_Wxxxxxxxxx
Capana09g000063	3	K	xxxxxxxxxx_K_Hxxxxxxxxx
Capana05g001589	5	K	xxxxxxxxxx_K_Yxxxxxxxxx
Capana11g001910	289	K	xxxxxxxxxx_K_Rxxxxxxxxx
Capana01g001863	88	K	xxxxxxxxxx_K_Nxxxxxxxxx
Capana09g001456	118	K	xxxxxxxxxx_K_Rxxxxxxxxx
Capana00g001461	108	K	xxxxxxxxxx_K_Dxxxxxxxxx
Capana02g003324	417	K	xxxxxxxxxH_K_xxxxxxxxxx
Capana00g004721	323	K	xxxxxxxxxx_K_Kxxxxxxxxx
Capana08g001639	137	K	xxxxxxxxxx_K_Kxxxxxxxxx
Capana07g000669	239	K	xxxxxxxxxx_K_Fxxxxxxxxx
Capana11g001953	142	K	xxxxxxxxxx_K_Yxxxxxxxxx
[truncated: 1,936 more rows]
