# Supplementary material for: Comprehensive Proteome and Lysine Acetylome Analysis Reveals the Widespread Involvement of Acetylation in Cold Resistance of Pepper (Capsicum annuum L.)
Source: Front Plant Sci. 2021 Aug 27;12:730489. doi: 10.3389/fpls.2021.730489 (PMC8429487; doi:10.3389/fpls.2021.730489)
Supplement: Supplementary Table 8 — A list of the identified acetylated proteins in KEGG pathways. [file Table_8.XLSX]

## Sheet: Sheet1
Table S8. List of the identified acetylated proteins in KEGG pathways.
Protein accession	Protein description
cann00010 Glycolysis / Gluconeogenesis（35）
Capana09g001701	AKRC9_ARATH Aldo-keto reductase family 4 member C9 OS=Arabidopsis thaliana GN=AKR4C9 PE=1 SV=1
Capana05g002207	DLDH_SYNY3 Dihydrolipoyl dehydrogenase OS=Synechocystis sp. (strain PCC 6803 / Kazusa) GN=lpdA PE=1 SV=3
Capana00g001096	"G3PC_PETHY Glyceraldehyde-3-phosphate dehydrogenase, cytosolic OS=Petunia hybrida GN=GAPC PE=2 SV=1"
Capana07g002419	"ALF1_PEA Fructose-bisphosphate aldolase, cytoplasmic isozyme 1 OS=Pisum sativum PE=2 SV=1"
Capana08g002681	"TPIC_SPIOL Triosephosphate isomerase, chloroplastic OS=Spinacia oleracea GN=TPIP1 PE=1 SV=1"
Capana09g001643	"F16P1_ARATH Fructose-1,6-bisphosphatase, chloroplastic OS=Arabidopsis thaliana GN=FBP PE=1 SV=2"
Capana05g002227	"DLDH1_ARATH Dihydrolipoyl dehydrogenase 1, mitochondrial OS=Arabidopsis thaliana GN=LPD1 PE=1 SV=2"
Capana01g003225	"PGMC_SOLTU Phosphoglucomutase, cytoplasmic OS=Solanum tuberosum GN=PGM1 PE=2 SV=1"
Capana08g002624	"ALFC2_ARATH Probable fructose-bisphosphate aldolase 2, chloroplastic OS=Arabidopsis thaliana GN=FBA2 PE=1 SV=2"
Capana09g002348	ENO_SOLLC Enolase OS=Solanum lycopersicum GN=PGH1 PE=2 SV=1
Capana11g001474	"ODPA_SOLTU Pyruvate dehydrogenase E1 component subunit alpha, mitochondrial OS=Solanum tuberosum PE=1 SV=1"
Capana07g002456	"PGKH_TOBAC Phosphoglycerate kinase, chloroplastic OS=Nicotiana tabacum PE=2 SV=1"
Capana07g000220	GAPN_NICPL NADP-dependent glyceraldehyde-3-phosphate dehydrogenase OS=Nicotiana plumbaginifolia GN=GAPN PE=2 SV=1
Capana02g002621	"ALFC2_ARATH Probable fructose-bisphosphate aldolase 2, chloroplastic OS=Arabidopsis thaliana GN=FBA2 PE=1 SV=2"
Capana05g000346	"TPIS_PETHY Triosephosphate isomerase, cytosolic OS=Petunia hybrida GN=TPIP1 PE=2 SV=1"
Capana09g000955	ADHX_ARATH Alcohol dehydrogenase class-3 OS=Arabidopsis thaliana GN=ADH2 PE=1 SV=2
Capana10g001955	ALF_ORYSJ Fructose-bisphosphate aldolase cytoplasmic isozyme OS=Oryza sativa subsp. japonica GN=FBA PE=1 SV=2
Capana04g000900	"PGMC_SOLTU Phosphoglucomutase, cytoplasmic OS=Solanum tuberosum GN=PGM1 PE=2 SV=1"
Capana06g000896	"G3PC_PETHY Glyceraldehyde-3-phosphate dehydrogenase, cytosolic OS=Petunia hybrida GN=GAPC PE=2 SV=1"
Capana11g002347	"ALFC3_ARATH Probable fructose-bisphosphate aldolase 3, chloroplastic OS=Arabidopsis thaliana GN=FBA3 PE=1 SV=1"
Capana04g001331	"F16P2_SOLTU Fructose-1,6-bisphosphatase, cytosolic OS=Solanum tuberosum PE=2 SV=1"
Capana03g002084	"KPYG_TOBAC Pyruvate kinase isozyme G, chloroplastic OS=Nicotiana tabacum PE=2 SV=1"
Capana03g000245	HXK1_TOBAC Hexokinase-1 OS=Nicotiana tabacum GN=HXK1 PE=2 SV=1
Capana02g000489	"ALFC2_ARATH Probable fructose-bisphosphate aldolase 2, chloroplastic OS=Arabidopsis thaliana GN=FBA2 PE=1 SV=2"
Capana08g001599	DLDH_SYNY3 Dihydrolipoyl dehydrogenase OS=Synechocystis sp. (strain PCC 6803 / Kazusa) GN=lpdA PE=1 SV=3
Capana04g001609	ODP2_ZYMMO Dihydrolipoyllysine-residue acetyltransferase component of pyruvate dehydrogenase complex OS=Zymomonas mobilis (strain ATCC 31821 / ZM4 / CP4) GN=pdhC PE=3 SV=2
Capana06g001736	ALDH_CRAPL Aldehyde dehydrogenase OS=Craterostigma plantagineum GN=ALDH PE=1 SV=1
Capana12g000537	PFPA_SOLTU Pyrophosphate--fructose 6-phosphate 1-phosphotransferase subunit alpha OS=Solanum tuberosum PE=1 SV=1
Capana07g002457	"PGKY_TOBAC Phosphoglycerate kinase, cytosolic OS=Nicotiana tabacum PE=2 SV=1"
Capana10g000224	G3P_HOMAM Glyceraldehyde-3-phosphate dehydrogenase OS=Homarus americanus PE=1 SV=2
Capana12g001220	"F16P2_SOLTU Fructose-1,6-bisphosphatase, cytosolic OS=Solanum tuberosum PE=2 SV=1"
Capana02g000197	"KPYC_SOYBN Pyruvate kinase, cytosolic isozyme OS=Glycine max PE=2 SV=1"
Capana03g000109	AL7A1_MALDO Aldehyde dehydrogenase family 7 member A1 OS=Malus domestica PE=1 SV=3
Capana07g000051	"OPD23_ARATH Dihydrolipoyllysine-residue acetyltransferase component 3 of pyruvate dehydrogenase complex, mitochondrial OS=Arabidopsis thaliana GN=At1g54220 PE=1 SV=1"
Capana02g002260	PFPB_SOLTU Pyrophosphate--fructose 6-phosphate 1-phosphotransferase subunit beta OS=Solanum tuberosum PE=1 SV=2
cann00020 Citrate cycle (TCA cycle)（18）
Capana05g002207	DLDH_SYNY3 Dihydrolipoyl dehydrogenase OS=Synechocystis sp. (strain PCC 6803 / Kazusa) GN=lpdA PE=1 SV=3
Capana00g004429	"ODO2B_ARATH Dihydrolipoyllysine-residue succinyltransferase component of 2-oxoglutarate dehydrogenase complex 2, mitochondrial OS=Arabidopsis thaliana GN=At4g26910 PE=1 SV=2"
Capana03g003831	"MDHC_MAIZE Malate dehydrogenase, cytoplasmic OS=Zea mays PE=2 SV=2"
Capana07g001429	"ACOC_CUCMA Aconitate hydratase, cytoplasmic OS=Cucurbita maxima PE=2 SV=1"
Capana05g002227	"DLDH1_ARATH Dihydrolipoyl dehydrogenase 1, mitochondrial OS=Arabidopsis thaliana GN=LPD1 PE=1 SV=2"
Capana07g001441	"ACOC_CUCMA Aconitate hydratase, cytoplasmic OS=Cucurbita maxima PE=2 SV=1"
Capana01g002320	ACLB1_ORYSJ ATP-citrate synthase beta chain protein 1 OS=Oryza sativa subsp. japonica GN=ACLB-1 PE=2 SV=1
Capana11g001474	"ODPA_SOLTU Pyruvate dehydrogenase E1 component subunit alpha, mitochondrial OS=Solanum tuberosum PE=1 SV=1"
Capana02g000308	"SUCA2_SOLLC Succinyl-CoA ligase [ADP-forming] subunit alpha-2, mitochondrial OS=Solanum lycopersicum PE=1 SV=1"
Capana08g001599	DLDH_SYNY3 Dihydrolipoyl dehydrogenase OS=Synechocystis sp. (strain PCC 6803 / Kazusa) GN=lpdA PE=1 SV=3
Capana04g001609	ODP2_ZYMMO Dihydrolipoyllysine-residue acetyltransferase component of pyruvate dehydrogenase complex OS=Zymomonas mobilis (strain ATCC 31821 / ZM4 / CP4) GN=pdhC PE=3 SV=2
Capana02g003587	"DHSB2_ARATH Succinate dehydrogenase [ubiquinone] iron-sulfur subunit 2, mitochondrial OS=Arabidopsis thaliana GN=SDH2-2 PE=1 SV=2"
Capana02g002686	"DHSA1_ARATH Succinate dehydrogenase [ubiquinone] flavoprotein subunit 1, mitochondrial OS=Arabidopsis thaliana GN=SDH1-1 PE=1 SV=1"
Capana00g000606	"ODO1_DICDI 2-oxoglutarate dehydrogenase, mitochondrial OS=Dictyostelium discoideum GN=ogdh PE=3 SV=1"
Capana00g003043	"CYSZ_CUCMA Citrate synthase, glyoxysomal OS=Cucurbita maxima PE=1 SV=1"
Capana01g003224	"CISY_DAUCA Citrate synthase, mitochondrial OS=Daucus carota GN=CS PE=2 SV=1"
Capana08g000010	IDHC_TOBAC Isocitrate dehydrogenase [NADP] OS=Nicotiana tabacum PE=2 SV=1
Capana07g000051	"OPD23_ARATH Dihydrolipoyllysine-residue acetyltransferase component 3 of pyruvate dehydrogenase complex, mitochondrial OS=Arabidopsis thaliana GN=At1g54220 PE=1 SV=1"
cann00030 Pentose phosphate pathway（22）
Capana02g000067	"TKTC_SOLTU Transketolase, chloroplastic OS=Solanum tuberosum PE=2 SV=1"
Capana07g002419	"ALF1_PEA Fructose-bisphosphate aldolase, cytoplasmic isozyme 1 OS=Pisum sativum PE=2 SV=1"
Capana09g001643	"F16P1_ARATH Fructose-1,6-bisphosphatase, chloroplastic OS=Arabidopsis thaliana GN=FBP PE=1 SV=2"
Capana00g002731	"6PGD_SYNE7 6-phosphogluconate dehydrogenase, decarboxylating OS=Synechococcus elongatus (strain PCC 7942) GN=gnd PE=1 SV=4"
Capana01g003225	"PGMC_SOLTU Phosphoglucomutase, cytoplasmic OS=Solanum tuberosum GN=PGM1 PE=2 SV=1"
Capana08g002624	"ALFC2_ARATH Probable fructose-bisphosphate aldolase 2, chloroplastic OS=Arabidopsis thaliana GN=FBA2 PE=1 SV=2"
Capana07g001192	"G6PDC_SOLTU Glucose-6-phosphate 1-dehydrogenase, chloroplastic OS=Solanum tuberosum PE=1 SV=1"
Capana07g000220	GAPN_NICPL NADP-dependent glyceraldehyde-3-phosphate dehydrogenase OS=Nicotiana plumbaginifolia GN=GAPN PE=2 SV=1
Capana02g002621	"ALFC2_ARATH Probable fructose-bisphosphate aldolase 2, chloroplastic OS=Arabidopsis thaliana GN=FBA2 PE=1 SV=2"
Capana05g001001	"TKTC_SOLTU Transketolase, chloroplastic OS=Solanum tuberosum PE=2 SV=1"
Capana12g001194	"6PGD_SYNE7 6-phosphogluconate dehydrogenase, decarboxylating OS=Synechococcus elongatus (strain PCC 7942) GN=gnd PE=1 SV=4"
Capana10g001955	ALF_ORYSJ Fructose-bisphosphate aldolase cytoplasmic isozyme OS=Oryza sativa subsp. japonica GN=FBA PE=1 SV=2
Capana04g000900	"PGMC_SOLTU Phosphoglucomutase, cytoplasmic OS=Solanum tuberosum GN=PGM1 PE=2 SV=1"
Capana11g002347	"ALFC3_ARATH Probable fructose-bisphosphate aldolase 3, chloroplastic OS=Arabidopsis thaliana GN=FBA3 PE=1 SV=1"
Capana04g001331	"F16P2_SOLTU Fructose-1,6-bisphosphatase, cytosolic OS=Solanum tuberosum PE=2 SV=1"
Capana02g000489	"ALFC2_ARATH Probable fructose-bisphosphate aldolase 2, chloroplastic OS=Arabidopsis thaliana GN=FBA2 PE=1 SV=2"
Capana01g000523	TAL_HAES2 Transaldolase OS=Haemophilus somnus (strain 2336) GN=tal PE=3 SV=1
Capana03g000806	"RPE_SOLTU Ribulose-phosphate 3-epimerase, chloroplastic (Fragment) OS=Solanum tuberosum PE=1 SV=1"
Capana07g001189	"G6PDC_SOLTU Glucose-6-phosphate 1-dehydrogenase, chloroplastic OS=Solanum tuberosum PE=1 SV=1"
Capana12g000537	PFPA_SOLTU Pyrophosphate--fructose 6-phosphate 1-phosphotransferase subunit alpha OS=Solanum tuberosum PE=1 SV=1
Capana12g001220	"F16P2_SOLTU Fructose-1,6-bisphosphatase, cytosolic OS=Solanum tuberosum PE=2 SV=1"
Capana02g002260	PFPB_SOLTU Pyrophosphate--fructose 6-phosphate 1-phosphotransferase subunit beta OS=Solanum tuberosum PE=1 SV=2
cann00040 Pentose and glucuronate interconversions（9）
Capana09g001701	AKRC9_ARATH Aldo-keto reductase family 4 member C9 OS=Arabidopsis thaliana GN=AKR4C9 PE=1 SV=1
Capana01g001582	IDND_VITVI L-idonate 5-dehydrogenase OS=Vitis vinifera GN=VIT_16s0100g00290 PE=1 SV=2
Capana00g003266	PME_ACTDE Pectinesterase OS=Actinidia deliciosa PE=1 SV=1
Capana07g000032	XYLA_ARATH Xylose isomerase OS=Arabidopsis thaliana GN=XYLA PE=2 SV=2
Capana12g002820	UGPA_SOLTU UTP--glucose-1-phosphate uridylyltransferase OS=Solanum tuberosum PE=1 SV=3
Capana03g000806	"RPE_SOLTU Ribulose-phosphate 3-epimerase, chloroplastic (Fragment) OS=Solanum tuberosum PE=1 SV=1"
Capana03g000068	PMEU1_SOLLC Pectinesterase/pectinesterase inhibitor U1 OS=Solanum lycopersicum GN=PMEU1 PE=2 SV=1
Capana00g004152	PME22_SOLLC Pectinesterase 2.2 OS=Solanum lycopersicum GN=PME2.2 PE=3 SV=1
Capana02g002161	PME18_ARATH Pectinesterase/pectinesterase inhibitor 18 OS=Arabidopsis thaliana GN=PME18 PE=1 SV=3
cann00051 Fructose and mannose metabolism（17）
Capana01g001582	IDND_VITVI L-idonate 5-dehydrogenase OS=Vitis vinifera GN=VIT_16s0100g00290 PE=1 SV=2
Capana07g002419	"ALF1_PEA Fructose-bisphosphate aldolase, cytoplasmic isozyme 1 OS=Pisum sativum PE=2 SV=1"
Capana08g002681	"TPIC_SPIOL Triosephosphate isomerase, chloroplastic OS=Spinacia oleracea GN=TPIP1 PE=1 SV=1"
Capana09g001643	"F16P1_ARATH Fructose-1,6-bisphosphatase, chloroplastic OS=Arabidopsis thaliana GN=FBP PE=1 SV=2"
Capana07g000032	XYLA_ARATH Xylose isomerase OS=Arabidopsis thaliana GN=XYLA PE=2 SV=2
Capana10g001955	ALF_ORYSJ Fructose-bisphosphate aldolase cytoplasmic isozyme OS=Oryza sativa subsp. japonica GN=FBA PE=1 SV=2
Capana08g002624	"ALFC2_ARATH Probable fructose-bisphosphate aldolase 2, chloroplastic OS=Arabidopsis thaliana GN=FBA2 PE=1 SV=2"
Capana02g002621	"ALFC2_ARATH Probable fructose-bisphosphate aldolase 2, chloroplastic OS=Arabidopsis thaliana GN=FBA2 PE=1 SV=2"
Capana05g000346	"TPIS_PETHY Triosephosphate isomerase, cytosolic OS=Petunia hybrida GN=TPIP1 PE=2 SV=1"
Capana04g001331	"F16P2_SOLTU Fructose-1,6-bisphosphatase, cytosolic OS=Solanum tuberosum PE=2 SV=1"
Capana11g002347	"ALFC3_ARATH Probable fructose-bisphosphate aldolase 3, chloroplastic OS=Arabidopsis thaliana GN=FBA3 PE=1 SV=1"
Capana02g000489	"ALFC2_ARATH Probable fructose-bisphosphate aldolase 2, chloroplastic OS=Arabidopsis thaliana GN=FBA2 PE=1 SV=2"
Capana03g000245	HXK1_TOBAC Hexokinase-1 OS=Nicotiana tabacum GN=HXK1 PE=2 SV=1
Capana12g000537	PFPA_SOLTU Pyrophosphate--fructose 6-phosphate 1-phosphotransferase subunit alpha OS=Solanum tuberosum PE=1 SV=1
Capana06g000734	SCRK2_SOLLC Fructokinase-2 OS=Solanum lycopersicum GN=FRK2 PE=2 SV=2
Capana12g001220	"F16P2_SOLTU Fructose-1,6-bisphosphatase, cytosolic OS=Solanum tuberosum PE=2 SV=1"
Capana02g002260	PFPB_SOLTU Pyrophosphate--fructose 6-phosphate 1-phosphotransferase subunit beta OS=Solanum tuberosum PE=1 SV=2
cann00052 Galactose metabolism（4）
Capana01g003225	"PGMC_SOLTU Phosphoglucomutase, cytoplasmic OS=Solanum tuberosum GN=PGM1 PE=2 SV=1"
Capana04g000900	"PGMC_SOLTU Phosphoglucomutase, cytoplasmic OS=Solanum tuberosum GN=PGM1 PE=2 SV=1"
Capana12g002820	UGPA_SOLTU UTP--glucose-1-phosphate uridylyltransferase OS=Solanum tuberosum PE=1 SV=3
Capana03g000245	HXK1_TOBAC Hexokinase-1 OS=Nicotiana tabacum GN=HXK1 PE=2 SV=1
cann00053 Ascorbate and aldarate metabolism（12）
Capana06g002561	"APX1_ARATH L-ascorbate peroxidase 1, cytosolic OS=Arabidopsis thaliana GN=APX1 PE=1 SV=2"
Capana01g000177	"MDARP_ARATH Monodehydroascorbate reductase, chloroplastic OS=Arabidopsis thaliana GN=At1g63940 PE=2 SV=3"
Capana05g000799	"DHAR3_ARATH Glutathione S-transferase DHAR3, chloroplastic OS=Arabidopsis thaliana GN=DHAR3 PE=1 SV=1"
Capana09g001881	"APX2_ARATH L-ascorbate peroxidase 2, cytosolic OS=Arabidopsis thaliana GN=APX2 PE=2 SV=3"
Capana08g001246	"GME1_ORYSJ GDP-mannose 3,5-epimerase 1 OS=Oryza sativa subsp. japonica GN=GME-1 PE=1 SV=1"
Capana03g004607	"GME1_ORYSJ GDP-mannose 3,5-epimerase 1 OS=Oryza sativa subsp. japonica GN=GME-1 PE=1 SV=1"
Capana04g002111	"APXT_ARATH L-ascorbate peroxidase T, chloroplastic OS=Arabidopsis thaliana GN=APXT PE=2 SV=2"
Capana06g001736	ALDH_CRAPL Aldehyde dehydrogenase OS=Craterostigma plantagineum GN=ALDH PE=1 SV=1
Capana04g000971	"TL29_SOLLC Thylakoid lumenal 29 kDa protein, chloroplastic OS=Solanum lycopersicum GN=CLEB3J9 PE=3 SV=1"
Capana03g000109	AL7A1_MALDO Aldehyde dehydrogenase family 7 member A1 OS=Malus domestica PE=1 SV=3
Capana05g002401	"DHAR1_ARATH Glutathione S-transferase DHAR1, mitochondrial OS=Arabidopsis thaliana GN=DHAR1 PE=1 SV=1"
Capana08g002729	"APX3_ARATH L-ascorbate peroxidase 3, peroxisomal OS=Arabidopsis thaliana GN=APX3 PE=1 SV=1"
cann00061 Fatty acid biosynthesis（3）
Capana00g002110	"LACS7_ARATH Long chain acyl-CoA synthetase 7, peroxisomal OS=Arabidopsis thaliana GN=LACS7 PE=1 SV=2"
Capana01g002806	LACS1_ARATH Long chain acyl-CoA synthetase 1 OS=Arabidopsis thaliana GN=LACS1 PE=2 SV=1
Capana06g002092	"STAD_RICCO Acyl-[acyl-carrier-protein] desaturase, chloroplastic OS=Ricinus communis PE=1 SV=1"
cann00071 Fatty acid degradation（7）
Capana00g002110	"LACS7_ARATH Long chain acyl-CoA synthetase 7, peroxisomal OS=Arabidopsis thaliana GN=LACS7 PE=1 SV=2"
Capana03g004369	"THIK2_ARATH 3-ketoacyl-CoA thiolase 2, peroxisomal OS=Arabidopsis thaliana GN=PED1 PE=1 SV=2"
Capana09g000955	ADHX_ARATH Alcohol dehydrogenase class-3 OS=Arabidopsis thaliana GN=ADH2 PE=1 SV=2
Capana06g001736	ALDH_CRAPL Aldehyde dehydrogenase OS=Craterostigma plantagineum GN=ALDH PE=1 SV=1
Capana01g002806	LACS1_ARATH Long chain acyl-CoA synthetase 1 OS=Arabidopsis thaliana GN=LACS1 PE=2 SV=1
Capana03g000109	AL7A1_MALDO Aldehyde dehydrogenase family 7 member A1 OS=Malus domestica PE=1 SV=3
Capana10g000325	"ACOX3_ARATH Acyl-coenzyme A oxidase 3, peroxisomal OS=Arabidopsis thaliana GN=ACX3 PE=1 SV=1"
cann00130 Ubiquinone and other terpenoid-quinone biosynthesis（2）
Capana04g002867	"IN37_SPIOL 37 kDa inner envelope membrane protein, chloroplastic OS=Spinacia oleracea PE=1 SV=1"
Capana10g000062	"MENB_ARATH 1,4-Dihydroxy-2-naphthoyl-CoA synthase, peroxisomal OS=Arabidopsis thaliana GN=MENB PE=1 SV=2"
cann00190 Oxidative phosphorylation（19）
Capana02g002193	"ATPG_TOBAC ATP synthase gamma chain, chloroplastic OS=Nicotiana tabacum GN=ATPC PE=1 SV=1"
Capana03g003995	"ATPA_SOLTU ATP synthase subunit alpha, chloroplastic OS=Solanum tuberosum GN=atpA PE=3 SV=1"
Capana06g000995	PMA1_SOLLC Plasma membrane ATPase 1 OS=Solanum lycopersicum GN=LHA1 PE=2 SV=1
Capana03g000067	NDBAA_ARATH NADH dehydrogenase [ubiquinone] 1 beta subcomplex subunit 10-A OS=Arabidopsis thaliana GN=At1g49140 PE=3 SV=1
Capana07g000909	PMA4_NICPL Plasma membrane ATPase 4 OS=Nicotiana plumbaginifolia GN=PMA4 PE=2 SV=1
Capana12g001027	VATA_DAUCA V-type proton ATPase catalytic subunit A OS=Daucus carota PE=2 SV=1
Capana01g002599	"ATPO_IPOBA ATP synthase subunit O, mitochondrial OS=Ipomoea batatas PE=1 SV=1"
Capana02g003587	"DHSB2_ARATH Succinate dehydrogenase [ubiquinone] iron-sulfur subunit 2, mitochondrial OS=Arabidopsis thaliana GN=SDH2-2 PE=1 SV=2"
Capana00g004323	"ATPBM_NICPL ATP synthase subunit beta, mitochondrial OS=Nicotiana plumbaginifolia GN=ATPB PE=1 SV=1"
Capana02g002686	"DHSA1_ARATH Succinate dehydrogenase [ubiquinone] flavoprotein subunit 1, mitochondrial OS=Arabidopsis thaliana GN=SDH1-1 PE=1 SV=1"
Capana03g001756	NDUAC_ARATH Probable NADH dehydrogenase [ubiquinone] 1 alpha subcomplex subunit 12 OS=Arabidopsis thaliana GN=At3g03100 PE=1 SV=1
Capana08g002146	"IPYR1_ARATH Soluble inorganic pyrophosphatase 1, chloroplastic OS=Arabidopsis thaliana GN=PPA1 PE=1 SV=1"
Capana08g002759	VATB1_GOSHI V-type proton ATPase subunit B 1 OS=Gossypium hirsutum PE=2 SV=1
Capana07g000951	"Putative ATP synthase subunit g, mitochondrial-like"
Capana12g001382	"ATPD_TOBAC ATP synthase delta chain, chloroplastic OS=Nicotiana tabacum GN=ATPD PE=2 SV=1"
Capana12g001493	VATG1_TOBAC V-type proton ATPase subunit G 1 OS=Nicotiana tabacum GN=VATG1 PE=3 SV=1
Capana02g001139	VATF_ARATH V-type proton ATPase subunit F OS=Arabidopsis thaliana GN=VHA-F PE=2 SV=1
Capana00g000559	VATE_CITLI V-type proton ATPase subunit E OS=Citrus limon GN=VATE PE=2 SV=1
Capana04g000951	"ATPF_SOLTU ATP synthase subunit b, chloroplastic OS=Solanum tuberosum GN=atpF PE=3 SV=1"
cann00195 Photosynthesis（19）
Capana00g001213	"PSBP_SOLLC Oxygen-evolving enhancer protein 2, chloroplastic OS=Solanum lycopersicum GN=PSBP PE=2 SV=1"
Capana02g002193	"ATPG_TOBAC ATP synthase gamma chain, chloroplastic OS=Nicotiana tabacum GN=ATPC PE=1 SV=1"
Capana02g003173	"PSBO_SOLTU Oxygen-evolving enhancer protein 1, chloroplastic OS=Solanum tuberosum GN=PSBO PE=2 SV=1"
Capana03g002267	"UCRIA_SOLTU Cytochrome b6-f complex iron-sulfur subunit, chloroplastic OS=Solanum tuberosum GN=petC PE=2 SV=1"
Capana07g000048	PSAA_TOBAC Photosystem I P700 chlorophyll a apoprotein A1 OS=Nicotiana tabacum GN=psaA PE=3 SV=2
Capana02g002577	"FENR1_TOBAC Ferredoxin--NADP reductase, leaf-type isozyme, chloroplastic OS=Nicotiana tabacum GN=PETH PE=2 SV=1"
Capana06g001915	"PSAD_SOLLC Photosystem I reaction center subunit II, chloroplastic OS=Solanum lycopersicum GN=psaD PE=2 SV=1"
Capana07g002488	"PSBR_SOLTU Photosystem II 10 kDa polypeptide, chloroplastic OS=Solanum tuberosum GN=PSBR PE=2 SV=1"
Capana02g000764	"PSBO_SOLLC Oxygen-evolving enhancer protein 1, chloroplastic OS=Solanum lycopersicum GN=PSBO PE=2 SV=2"
Capana01g004493	"PSAN_ARATH Photosystem I reaction center subunit N, chloroplastic OS=Arabidopsis thaliana GN=PSAN PE=1 SV=2"
Capana03g003995	"ATPA_SOLTU ATP synthase subunit alpha, chloroplastic OS=Solanum tuberosum GN=atpA PE=3 SV=1"
Capana10g001865	"PSBP_SOLLC Oxygen-evolving enhancer protein 2, chloroplastic OS=Solanum lycopersicum GN=PSBP PE=2 SV=1"
Capana02g002133	"PSBQ2_ARATH Oxygen-evolving enhancer protein 3-2, chloroplastic OS=Arabidopsis thaliana GN=PSBQ2 PE=1 SV=2"
Capana02g000862	CYF_ATRBE Apocytochrome f OS=Atropa belladonna GN=petA PE=3 SV=1
Capana04g000192	"PSAEA_NICSY Photosystem I reaction center subunit IV A, chloroplastic OS=Nicotiana sylvestris GN=PSAEA PE=1 SV=1"
Capana00g001154	PSBB_TOBAC Photosystem II CP47 chlorophyll apoprotein OS=Nicotiana tabacum GN=psbB PE=3 SV=1
Capana12g001382	"ATPD_TOBAC ATP synthase delta chain, chloroplastic OS=Nicotiana tabacum GN=ATPD PE=2 SV=1"
Capana03g000905	"PPL1_ARATH PsbP-like protein 1, chloroplastic OS=Arabidopsis thaliana GN=PPL1 PE=1 SV=1"
Capana04g000951	"ATPF_SOLTU ATP synthase subunit b, chloroplastic OS=Solanum tuberosum GN=atpF PE=3 SV=1"
cann00196 Photosynthesis - antenna proteins（8）
Capana01g002398	"CB5_ARATH Chlorophyll a-b binding protein CP26, chloroplastic OS=Arabidopsis thaliana GN=LHCB5 PE=2 SV=1"
Capana04g002820	"CB2G_SOLLC Chlorophyll a-b binding protein 3C, chloroplastic OS=Solanum lycopersicum GN=CAB3C PE=3 SV=1"
Capana07g001245	"CB24_SOLLC Chlorophyll a-b binding protein 4, chloroplastic OS=Solanum lycopersicum GN=CAB4 PE=2 SV=1"
Capana08g002012	"CB4A_SOLLC Chlorophyll a-b binding protein CP24 10A, chloroplastic OS=Solanum lycopersicum GN=CAP10A PE=3 SV=1"
Capana05g002550	"CB11_SOLLC Chlorophyll a-b binding protein 6A, chloroplastic OS=Solanum lycopersicum GN=CAB6A PE=2 SV=1"
Capana03g000797	"CB24_PEA Chlorophyll a-b binding protein P4, chloroplastic OS=Pisum sativum GN=lhcA-P4 PE=1 SV=1"
Capana08g002008	"CB4A_SOLLC Chlorophyll a-b binding protein CP24 10A, chloroplastic OS=Solanum lycopersicum GN=CAP10A PE=3 SV=1"
Capana00g002796	"CB2B_SOLLC Chlorophyll a-b binding protein 1B, chloroplastic OS=Solanum lycopersicum GN=CAB1B PE=3 SV=1"
cann00220 Arginine biosynthesis（7）
Capana01g000323	"ARGD_ALNGL Acetylornithine aminotransferase, mitochondrial OS=Alnus glutinosa GN=AG118 PE=2 SV=1"
Capana08g002444	"ARGC_ARATH Probable N-acetyl-gamma-glutamyl-phosphate reductase, chloroplastic OS=Arabidopsis thaliana GN=At2g19940 PE=1 SV=2"
Capana08g000430	"AAT5_ARATH Aspartate aminotransferase, chloroplastic OS=Arabidopsis thaliana GN=ASP5 PE=1 SV=2"
Capana01g003049	"GLNA2_DAUCA Glutamine synthetase, chloroplastic OS=Daucus carota GN=GLN2 PE=2 SV=1"
Capana01g001049	ARGE_DICDI Acetylornithine deacetylase OS=Dictyostelium discoideum GN=argE PE=1 SV=2
Capana05g000857	GLNA_NICPL Glutamine synthetase OS=Nicotiana plumbaginifolia PE=2 SV=1
Capana05g000208	GLN11_ORYSJ Glutamine synthetase cytosolic isozyme 1-1 OS=Oryza sativa subsp. japonica GN=GLN1-1 PE=1 SV=1
cann00230 Purine metabolism（12）
Capana01g000988	PUR9_LISMF Bifunctional purine biosynthesis protein PurH OS=Listeria monocytogenes serotype 4b (strain F2365) GN=purH PE=3 SV=1
Capana06g000891	"NDK2_TOBAC Nucleoside diphosphate kinase 2, chloroplastic OS=Nicotiana tabacum GN=NDPK2 PE=1 SV=1"
Capana07g000082	PUR8_PSEAE Adenylosuccinate lyase OS=Pseudomonas aeruginosa (strain ATCC 15692 / PAO1 / 1C / PRS 101 / LMG 12228) GN=purB PE=3 SV=1
Capana06g001357	"KADC2_ARATH Probable adenylate kinase 2, chloroplastic OS=Arabidopsis thaliana GN=At5g47840 PE=2 SV=1"
Capana01g003225	"PGMC_SOLTU Phosphoglucomutase, cytoplasmic OS=Solanum tuberosum GN=PGM1 PE=2 SV=1"
Capana04g000900	"PGMC_SOLTU Phosphoglucomutase, cytoplasmic OS=Solanum tuberosum GN=PGM1 PE=2 SV=1"
Capana03g002084	"KPYG_TOBAC Pyruvate kinase isozyme G, chloroplastic OS=Nicotiana tabacum PE=2 SV=1"
Capana03g004628	"APS1_ARATH ATP sulfurylase 1, chloroplastic OS=Arabidopsis thaliana GN=APS1 PE=1 SV=1"
Capana03g001387	"NDK2_TOBAC Nucleoside diphosphate kinase 2, chloroplastic OS=Nicotiana tabacum GN=NDPK2 PE=1 SV=1"
Capana03g004547	Y588_HAEIN Uncharacterized hydrolase HI_0588 OS=Haemophilus influenzae (strain ATCC 51907 / DSM 11121 / KW20 / Rd) GN=HI_0588 PE=1 SV=1
Capana02g000197	"KPYC_SOYBN Pyruvate kinase, cytosolic isozyme OS=Glycine max PE=2 SV=1"
Capana00g003379	"NDK4_ARATH Nucleoside diphosphate kinase IV, chloroplastic/mitochondrial OS=Arabidopsis thaliana GN=NDK4 PE=1 SV=2"
cann00240 Pyrimidine metabolism（4）
Capana11g000358	UMPS_TOBAC Uridine 5'-monophosphate synthase (Fragment) OS=Nicotiana tabacum GN=PYR5-6 PE=2 SV=1
Capana06g000891	"NDK2_TOBAC Nucleoside diphosphate kinase 2, chloroplastic OS=Nicotiana tabacum GN=NDPK2 PE=1 SV=1"
Capana03g001387	"NDK2_TOBAC Nucleoside diphosphate kinase 2, chloroplastic OS=Nicotiana tabacum GN=NDPK2 PE=1 SV=1"
Capana00g003379	"NDK4_ARATH Nucleoside diphosphate kinase IV, chloroplastic/mitochondrial OS=Arabidopsis thaliana GN=NDK4 PE=1 SV=2"
cann00250 Alanine, aspartate and glutamate metabolism（9）
Capana08g000430	"AAT5_ARATH Aspartate aminotransferase, chloroplastic OS=Arabidopsis thaliana GN=ASP5 PE=1 SV=2"
Capana01g003049	"GLNA2_DAUCA Glutamine synthetase, chloroplastic OS=Daucus carota GN=GLN2 PE=2 SV=1"
Capana07g000082	PUR8_PSEAE Adenylosuccinate lyase OS=Pseudomonas aeruginosa (strain ATCC 15692 / PAO1 / 1C / PRS 101 / LMG 12228) GN=purB PE=3 SV=1
Capana12g000116	SGAT_ARATH Serine--glyoxylate aminotransferase OS=Arabidopsis thaliana GN=AGT1 PE=1 SV=2
Capana12g002824	DCE_PETHY Glutamate decarboxylase OS=Petunia hybrida GN=GAD PE=1 SV=1
Capana05g000857	GLNA_NICPL Glutamine synthetase OS=Nicotiana plumbaginifolia PE=2 SV=1
Capana03g003941	"SSDH_ARATH Succinate-semialdehyde dehydrogenase, mitochondrial OS=Arabidopsis thaliana GN=ALDH5F1 PE=1 SV=2"
Capana06g001007	ALDH_LINUS Probable aldehyde dehydrogenase OS=Linum usitatissimum GN=FIS1 PE=2 SV=1
Capana05g000208	GLN11_ORYSJ Glutamine synthetase cytosolic isozyme 1-1 OS=Oryza sativa subsp. japonica GN=GLN1-1 PE=1 SV=1
cann00260 Glycine, serine and threonine metabolism（20）
Capana05g002207	DLDH_SYNY3 Dihydrolipoyl dehydrogenase OS=Synechocystis sp. (strain PCC 6803 / Kazusa) GN=lpdA PE=1 SV=3
Capana08g002744	DHGY_CUCSA Glycerate dehydrogenase OS=Cucumis sativus GN=HPR-A PE=2 SV=1
Capana12g000479	"GCSP_SOLTU Glycine dehydrogenase [decarboxylating], mitochondrial OS=Solanum tuberosum GN=GDCSP PE=2 SV=1"
Capana08g002743	DHGY_CUCSA Glycerate dehydrogenase OS=Cucumis sativus GN=HPR-A PE=2 SV=1
Capana05g002227	"DLDH1_ARATH Dihydrolipoyl dehydrogenase 1, mitochondrial OS=Arabidopsis thaliana GN=LPD1 PE=1 SV=2"
Capana06g001195	"THRC_SOLTU Threonine synthase, chloroplastic OS=Solanum tuberosum PE=2 SV=1"
Capana02g002887	"GLYM_SOLTU Serine hydroxymethyltransferase, mitochondrial OS=Solanum tuberosum PE=2 SV=1"
Capana12g000116	SGAT_ARATH Serine--glyoxylate aminotransferase OS=Arabidopsis thaliana GN=AGT1 PE=1 SV=2
Capana08g000412	"GLYM_ARATH Serine hydroxymethyltransferase, mitochondrial OS=Arabidopsis thaliana GN=SHM1 PE=1 SV=1"
Capana03g001022	"BADH_SPIOL Betaine aldehyde dehydrogenase, chloroplastic OS=Spinacia oleracea PE=1 SV=1"
Capana06g001561	"GCSH_FLAAN Glycine cleavage system H protein, mitochondrial OS=Flaveria anomala GN=GDCSH PE=2 SV=1"
Capana03g000142	"THRC_SOLTU Threonine synthase, chloroplastic OS=Solanum tuberosum PE=2 SV=1"
Capana08g001599	DLDH_SYNY3 Dihydrolipoyl dehydrogenase OS=Synechocystis sp. (strain PCC 6803 / Kazusa) GN=lpdA PE=1 SV=3
Capana03g000306	"GLYK_ARATH D-glycerate 3-kinase, chloroplastic OS=Arabidopsis thaliana GN=GLYK PE=1 SV=2"
Capana08g000323	"GCSP_SOLTU Glycine dehydrogenase [decarboxylating], mitochondrial OS=Solanum tuberosum GN=GDCSP PE=2 SV=1"
Capana02g002219	"GCST_SOLTU Aminomethyltransferase, mitochondrial OS=Solanum tuberosum GN=GDCST PE=2 SV=1"
Capana02g001195	"GCSH_FLAAN Glycine cleavage system H protein, mitochondrial OS=Flaveria anomala GN=GDCSH PE=2 SV=1"
Capana00g000453	"GCSH_FLAAN Glycine cleavage system H protein, mitochondrial OS=Flaveria anomala GN=GDCSH PE=2 SV=1"
Capana03g000109	AL7A1_MALDO Aldehyde dehydrogenase family 7 member A1 OS=Malus domestica PE=1 SV=3
Capana06g000973	"BADH1_ARATH Betaine aldehyde dehydrogenase 1, chloroplastic OS=Arabidopsis thaliana GN=ALDH10A8 PE=2 SV=1"
cann00261 Monobactam biosynthesis（1）
Capana03g004628	"APS1_ARATH ATP sulfurylase 1, chloroplastic OS=Arabidopsis thaliana GN=APS1 PE=1 SV=1"
cann00270 Cysteine and methionine metabolism（14）
Capana09g002238	METK3_SOLLC S-adenosylmethionine synthase 3 OS=Solanum lycopersicum GN=SAM3 PE=2 SV=1
Capana08g000430	"AAT5_ARATH Aspartate aminotransferase, chloroplastic OS=Arabidopsis thaliana GN=ASP5 PE=1 SV=2"
Capana08g001658	METK1_SOLTU S-adenosylmethionine synthase 1 OS=Solanum tuberosum GN=METK1 PE=2 SV=1
Capana03g003831	"MDHC_MAIZE Malate dehydrogenase, cytoplasmic OS=Zea mays PE=2 SV=2"
Capana07g002178	MTBC1_VITVI Probable bifunctional methylthioribulose-1-phosphate dehydratase/enolase-phosphatase E1 1 OS=Vitis vinifera GN=VIT_19s0014g02480 PE=2 SV=2
Capana03g004084	SAHH_TOBAC Adenosylhomocysteinase OS=Nicotiana tabacum GN=SAHH PE=2 SV=1
Capana00g004772	METE_CATRO 5-methyltetrahydropteroyltriglutamate--homocysteine methyltransferase OS=Catharanthus roseus GN=METE PE=2 SV=1
Capana10g001856	METK2_TOBAC S-adenosylmethionine synthase 2 OS=Nicotiana tabacum GN=SAMS2 PE=2 SV=1
Capana02g002928	"BCAT5_ARATH Branched-chain-amino-acid aminotransferase 5, chloroplastic OS=Arabidopsis thaliana GN=BCAT5 PE=1 SV=1"
Capana02g002264	ACCO_ACTDE 1-aminocyclopropane-1-carboxylate oxidase OS=Actinidia deliciosa GN=ACO PE=2 SV=1
Capana01g004297	CMT2_ARATH DNA (cytosine-5)-methyltransferase CMT2 OS=Arabidopsis thaliana GN=CMT2 PE=2 SV=3
Capana03g003700	CYSK_SOLTU Cysteine synthase OS=Solanum tuberosum PE=2 SV=1
Capana01g000239	"GSH1_SOLLC Glutamate--cysteine ligase, chloroplastic OS=Solanum lycopersicum GN=GSH1 PE=2 SV=1"
Capana11g001342	SPDE_SOLLC Spermidine synthase OS=Solanum lycopersicum GN=SPDSYN PE=2 SV=1
cann00280 Valine, leucine and isoleucine degradation（8）
Capana05g002207	DLDH_SYNY3 Dihydrolipoyl dehydrogenase OS=Synechocystis sp. (strain PCC 6803 / Kazusa) GN=lpdA PE=1 SV=3
Capana05g002227	"DLDH1_ARATH Dihydrolipoyl dehydrogenase 1, mitochondrial OS=Arabidopsis thaliana GN=LPD1 PE=1 SV=2"
Capana02g002928	"BCAT5_ARATH Branched-chain-amino-acid aminotransferase 5, chloroplastic OS=Arabidopsis thaliana GN=BCAT5 PE=1 SV=1"
Capana03g004369	"THIK2_ARATH 3-ketoacyl-CoA thiolase 2, peroxisomal OS=Arabidopsis thaliana GN=PED1 PE=1 SV=2"
Capana01g002460	"ODB2_HUMAN Lipoamide acyltransferase component of branched-chain alpha-keto acid dehydrogenase complex, mitochondrial OS=Homo sapiens GN=DBT PE=1 SV=3"
Capana08g001599	DLDH_SYNY3 Dihydrolipoyl dehydrogenase OS=Synechocystis sp. (strain PCC 6803 / Kazusa) GN=lpdA PE=1 SV=3
Capana06g001736	ALDH_CRAPL Aldehyde dehydrogenase OS=Craterostigma plantagineum GN=ALDH PE=1 SV=1
Capana03g000109	AL7A1_MALDO Aldehyde dehydrogenase family 7 member A1 OS=Malus domestica PE=1 SV=3
cann00290 Valine, leucine and isoleucine biosynthesis（4）
Capana00g003542	"ILV5_ARATH Ketol-acid reductoisomerase, chloroplastic OS=Arabidopsis thaliana GN=At3g58610 PE=2 SV=2"
Capana04g002823	LEUC_ARATH 3-isopropylmalate dehydratase OS=Arabidopsis thaliana GN=IIL1 PE=2 SV=1
Capana02g002928	"BCAT5_ARATH Branched-chain-amino-acid aminotransferase 5, chloroplastic OS=Arabidopsis thaliana GN=BCAT5 PE=1 SV=1"
Capana00g002624	"LEU32_ARATH 3-isopropylmalate dehydrogenase 2, chloroplastic OS=Arabidopsis thaliana GN=IMDH2 PE=1 SV=1"
cann00300 Lysine biosynthesis（3）
Capana09g002021	"DAPF_ARATH Diaminopimelate epimerase, chloroplastic OS=Arabidopsis thaliana GN=DAPF PE=1 SV=1"
Capana06g000726	"DAPAT_ARATH LL-diaminopimelate aminotransferase, chloroplastic OS=Arabidopsis thaliana GN=DAP PE=1 SV=1"
Capana08g002563	"DCDA1_ARATH Diaminopimelate decarboxylase 1, chloroplastic OS=Arabidopsis thaliana GN=LYSA1 PE=1 SV=1"
cann00310 Lysine degradation（6）
Capana05g002207	DLDH_SYNY3 Dihydrolipoyl dehydrogenase OS=Synechocystis sp. (strain PCC 6803 / Kazusa) GN=lpdA PE=1 SV=3
Capana00g004429	"ODO2B_ARATH Dihydrolipoyllysine-residue succinyltransferase component of 2-oxoglutarate dehydrogenase complex 2, mitochondrial OS=Arabidopsis thaliana GN=At4g26910 PE=1 SV=2"
Capana05g002227	"DLDH1_ARATH Dihydrolipoyl dehydrogenase 1, mitochondrial OS=Arabidopsis thaliana GN=LPD1 PE=1 SV=2"
Capana08g001599	DLDH_SYNY3 Dihydrolipoyl dehydrogenase OS=Synechocystis sp. (strain PCC 6803 / Kazusa) GN=lpdA PE=1 SV=3
Capana06g001736	ALDH_CRAPL Aldehyde dehydrogenase OS=Craterostigma plantagineum GN=ALDH PE=1 SV=1
Capana03g000109	AL7A1_MALDO Aldehyde dehydrogenase family 7 member A1 OS=Malus domestica PE=1 SV=3
cann00330 Arginine and proline metabolism（6）
Capana08g000430	"AAT5_ARATH Aspartate aminotransferase, chloroplastic OS=Arabidopsis thaliana GN=ASP5 PE=1 SV=2"
Capana04g000866	PIP_ARATH Proline iminopeptidase OS=Arabidopsis thaliana GN=PIP PE=2 SV=3
Capana06g001736	ALDH_CRAPL Aldehyde dehydrogenase OS=Craterostigma plantagineum GN=ALDH PE=1 SV=1
Capana06g001007	ALDH_LINUS Probable aldehyde dehydrogenase OS=Linum usitatissimum GN=FIS1 PE=2 SV=1
Capana03g000109	AL7A1_MALDO Aldehyde dehydrogenase family 7 member A1 OS=Malus domestica PE=1 SV=3
Capana11g001342	SPDE_SOLLC Spermidine synthase OS=Solanum lycopersicum GN=SPDSYN PE=2 SV=1
cann00340 Histidine metabolism（3）
Capana06g001736	ALDH_CRAPL Aldehyde dehydrogenase OS=Craterostigma plantagineum GN=ALDH PE=1 SV=1
Capana03g000109	AL7A1_MALDO Aldehyde dehydrogenase family 7 member A1 OS=Malus domestica PE=1 SV=3
Capana02g001675	"HISX_ARATH Histidinol dehydrogenase, chloroplastic OS=Arabidopsis thaliana GN=HDH PE=2 SV=1"
cann00350 Tyrosine metabolism（2）
Capana08g000430	"AAT5_ARATH Aspartate aminotransferase, chloroplastic OS=Arabidopsis thaliana GN=ASP5 PE=1 SV=2"
Capana09g000955	ADHX_ARATH Alcohol dehydrogenase class-3 OS=Arabidopsis thaliana GN=ADH2 PE=1 SV=2
cann00360 Phenylalanine metabolism（1）
Capana08g000430	"AAT5_ARATH Aspartate aminotransferase, chloroplastic OS=Arabidopsis thaliana GN=ASP5 PE=1 SV=2"
cann00380 Tryptophan metabolism（6）
Capana05g002207	DLDH_SYNY3 Dihydrolipoyl dehydrogenase OS=Synechocystis sp. (strain PCC 6803 / Kazusa) GN=lpdA PE=1 SV=3
Capana00g004429	"ODO2B_ARATH Dihydrolipoyllysine-residue succinyltransferase component of 2-oxoglutarate dehydrogenase complex 2, mitochondrial OS=Arabidopsis thaliana GN=At4g26910 PE=1 SV=2"
Capana05g002227	"DLDH1_ARATH Dihydrolipoyl dehydrogenase 1, mitochondrial OS=Arabidopsis thaliana GN=LPD1 PE=1 SV=2"
Capana08g001599	DLDH_SYNY3 Dihydrolipoyl dehydrogenase OS=Synechocystis sp. (strain PCC 6803 / Kazusa) GN=lpdA PE=1 SV=3
Capana06g001736	ALDH_CRAPL Aldehyde dehydrogenase OS=Craterostigma plantagineum GN=ALDH PE=1 SV=1
Capana03g000109	AL7A1_MALDO Aldehyde dehydrogenase family 7 member A1 OS=Malus domestica PE=1 SV=3
cann00400 Phenylalanine, tyrosine and tryptophan biosynthesis（3）
Capana08g000430	"AAT5_ARATH Aspartate aminotransferase, chloroplastic OS=Arabidopsis thaliana GN=ASP5 PE=1 SV=2"
Capana02g002554	AROB_THISH 3-dehydroquinate synthase OS=Thioalkalivibrio sp. (strain HL-EbGR7) GN=aroB PE=3 SV=1
Capana05g000531	"AROC2_SOLLC Chorismate synthase 2, chloroplastic OS=Solanum lycopersicum GN=CS2 PE=2 SV=1"
cann00410 beta-Alanine metabolism（4）
Capana12g002824	DCE_PETHY Glutamate decarboxylase OS=Petunia hybrida GN=GAD PE=1 SV=1
Capana06g001736	ALDH_CRAPL Aldehyde dehydrogenase OS=Craterostigma plantagineum GN=ALDH PE=1 SV=1
Capana03g000109	AL7A1_MALDO Aldehyde dehydrogenase family 7 member A1 OS=Malus domestica PE=1 SV=3
Capana10g000325	"ACOX3_ARATH Acyl-coenzyme A oxidase 3, peroxisomal OS=Arabidopsis thaliana GN=ACX3 PE=1 SV=1"
cann00430 Taurine and hypotaurine metabolism（1）
Capana12g002824	DCE_PETHY Glutamate decarboxylase OS=Petunia hybrida GN=GAD PE=1 SV=1
cann00450 Selenocompound metabolism（4）
Capana10g002214	TRXB3_ARATH NADPH-dependent thioredoxin reductase 3 OS=Arabidopsis thaliana GN=NTRC PE=1 SV=2
Capana00g004772	METE_CATRO 5-methyltetrahydropteroyltriglutamate--homocysteine methyltransferase OS=Catharanthus roseus GN=METE PE=2 SV=1
Capana05g002269	SYM_ARATH Probable methionine--tRNA ligase OS=Arabidopsis thaliana GN=At4g13780 PE=2 SV=1
Capana03g004628	"APS1_ARATH ATP sulfurylase 1, chloroplastic OS=Arabidopsis thaliana GN=APS1 PE=1 SV=1"
cann00460 Cyanoamino acid metabolism（5）
Capana02g002887	"GLYM_SOLTU Serine hydroxymethyltransferase, mitochondrial OS=Solanum tuberosum PE=2 SV=1"
Capana08g000412	"GLYM_ARATH Serine hydroxymethyltransferase, mitochondrial OS=Arabidopsis thaliana GN=SHM1 PE=1 SV=1"
Capana05g000110	GLUA_DICDI Lysosomal beta glucosidase OS=Dictyostelium discoideum GN=gluA PE=1 SV=2
Capana06g000675	GLUA_DICDI Lysosomal beta glucosidase OS=Dictyostelium discoideum GN=gluA PE=1 SV=2
Capana06g000681	GLUA_DICDI Lysosomal beta glucosidase OS=Dictyostelium discoideum GN=gluA PE=1 SV=2
cann00480 Glutathione metabolism（22）
Capana06g002561	"APX1_ARATH L-ascorbate peroxidase 1, cytosolic OS=Arabidopsis thaliana GN=APX1 PE=1 SV=2"
Capana05g000799	"DHAR3_ARATH Glutathione S-transferase DHAR3, chloroplastic OS=Arabidopsis thaliana GN=DHAR3 PE=1 SV=1"
Capana01g000243	AMPN_ECOLI Aminopeptidase N OS=Escherichia coli (strain K12) GN=pepN PE=1 SV=2
Capana12g001194	"6PGD_SYNE7 6-phosphogluconate dehydrogenase, decarboxylating OS=Synechococcus elongatus (strain PCC 7942) GN=gnd PE=1 SV=4"
Capana09g001881	"APX2_ARATH L-ascorbate peroxidase 2, cytosolic OS=Arabidopsis thaliana GN=APX2 PE=2 SV=3"
Capana00g002731	"6PGD_SYNE7 6-phosphogluconate dehydrogenase, decarboxylating OS=Synechococcus elongatus (strain PCC 7942) GN=gnd PE=1 SV=4"
Capana01g003981	"GPX7_ARATH Putative glutathione peroxidase 7, chloroplastic OS=Arabidopsis thaliana GN=GPX7 PE=2 SV=2"
Capana07g001192	"G6PDC_SOLTU Glucose-6-phosphate 1-dehydrogenase, chloroplastic OS=Solanum tuberosum PE=1 SV=1"
Capana04g002111	"APXT_ARATH L-ascorbate peroxidase T, chloroplastic OS=Arabidopsis thaliana GN=APXT PE=2 SV=2"
Capana00g003105	GSTX4_TOBAC Probable glutathione S-transferase OS=Nicotiana tabacum PE=2 SV=1
Capana09g001761	GSTX1_SOLTU Probable glutathione S-transferase OS=Solanum tuberosum GN=PRP1 PE=2 SV=1
Capana07g001189	"G6PDC_SOLTU Glucose-6-phosphate 1-dehydrogenase, chloroplastic OS=Solanum tuberosum PE=1 SV=1"
Capana09g001864	IN21B_ORYSJ Protein IN2-1 homolog B OS=Oryza sativa subsp. japonica GN=GSTZ5 PE=2 SV=1
Capana04g000971	"TL29_SOLLC Thylakoid lumenal 29 kDa protein, chloroplastic OS=Solanum lycopersicum GN=CLEB3J9 PE=3 SV=1"
Capana01g003292	GST23_MAIZE Glutathione transferase GST 23 OS=Zea mays PE=2 SV=1
Capana09g000125	"AMPL2_SOLLC Leucine aminopeptidase 2, chloroplastic OS=Solanum lycopersicum GN=LAPA2 PE=2 SV=1"
Capana01g000239	"GSH1_SOLLC Glutamate--cysteine ligase, chloroplastic OS=Solanum lycopersicum GN=GSH1 PE=2 SV=1"
Capana08g000010	IDHC_TOBAC Isocitrate dehydrogenase [NADP] OS=Nicotiana tabacum PE=2 SV=1
Capana11g001342	SPDE_SOLLC Spermidine synthase OS=Solanum lycopersicum GN=SPDSYN PE=2 SV=1
Capana07g002010	GSTX4_TOBAC Probable glutathione S-transferase OS=Nicotiana tabacum PE=2 SV=1
Capana05g002401	"DHAR1_ARATH Glutathione S-transferase DHAR1, mitochondrial OS=Arabidopsis thaliana GN=DHAR1 PE=1 SV=1"
Capana08g002729	"APX3_ARATH L-ascorbate peroxidase 3, peroxisomal OS=Arabidopsis thaliana GN=APX3 PE=1 SV=1"
cann00500 Starch and sucrose metabolism（10）
Capana04g001731	"PHSL1_SOLTU Alpha-1,4 glucan phosphorylase L-1 isozyme, chloroplastic/amyloplastic OS=Solanum tuberosum PE=1 SV=2"
Capana02g003365	"SSY2_SOLTU Granule-bound starch synthase 2, chloroplastic/amyloplastic OS=Solanum tuberosum GN=SS2 PE=1 SV=3"
Capana01g003225	"PGMC_SOLTU Phosphoglucomutase, cytoplasmic OS=Solanum tuberosum GN=PGM1 PE=2 SV=1"
Capana04g000900	"PGMC_SOLTU Phosphoglucomutase, cytoplasmic OS=Solanum tuberosum GN=PGM1 PE=2 SV=1"
Capana05g000110	GLUA_DICDI Lysosomal beta glucosidase OS=Dictyostelium discoideum GN=gluA PE=1 SV=2
Capana06g000675	GLUA_DICDI Lysosomal beta glucosidase OS=Dictyostelium discoideum GN=gluA PE=1 SV=2
Capana12g002820	UGPA_SOLTU UTP--glucose-1-phosphate uridylyltransferase OS=Solanum tuberosum PE=1 SV=3
Capana03g000245	HXK1_TOBAC Hexokinase-1 OS=Nicotiana tabacum GN=HXK1 PE=2 SV=1
Capana06g000734	SCRK2_SOLLC Fructokinase-2 OS=Solanum lycopersicum GN=FRK2 PE=2 SV=2
Capana06g000681	GLUA_DICDI Lysosomal beta glucosidase OS=Dictyostelium discoideum GN=gluA PE=1 SV=2
cann00510 N-Glycan biosynthesis（1）
Capana08g002518	OST48_DANRE Dolichyl-diphosphooligosaccharide--protein glycosyltransferase 48 kDa subunit OS=Danio rerio GN=ddost PE=2 SV=2
cann00511 Other glycan degradation（2）
Capana03g004052	"GSHRC_PEA Glutathione reductase, cytosolic OS=Pisum sativum PE=2 SV=1"
Capana06g001062	MA2B1_CAVPO Lysosomal alpha-mannosidase OS=Cavia porcellus GN=MAN2B1 PE=1 SV=1
cann00513 Various types of N-glycan biosynthesis（1）
Capana08g002518	OST48_DANRE Dolichyl-diphosphooligosaccharide--protein glycosyltransferase 48 kDa subunit OS=Danio rerio GN=ddost PE=2 SV=2
cann00520 Amino sugar and nucleotide sugar metabolism（16）
Capana00g004374	ARNA_SERP5 Bifunctional polymyxin resistance protein ArnA OS=Serratia proteamaculans (strain 568) GN=arnA PE=3 SV=1
Capana01g003225	"PGMC_SOLTU Phosphoglucomutase, cytoplasmic OS=Solanum tuberosum GN=PGM1 PE=2 SV=1"
Capana01g000354	RHM1_ARATH Probable rhamnose biosynthetic enzyme 1 OS=Arabidopsis thaliana GN=RHM1 PE=1 SV=1
Capana08g001246	"GME1_ORYSJ GDP-mannose 3,5-epimerase 1 OS=Oryza sativa subsp. japonica GN=GME-1 PE=1 SV=1"
Capana07g002059	RHM1_ARATH Probable rhamnose biosynthetic enzyme 1 OS=Arabidopsis thaliana GN=RHM1 PE=1 SV=1
Capana00g004765	NCB5R_NEOFI NADH-cytochrome b5 reductase 1 OS=Neosartorya fischeri (strain ATCC 1020 / DSM 3700 / FGSC A1164 / NRRL 181) GN=cbr1 PE=3 SV=2
Capana03g004607	"GME1_ORYSJ GDP-mannose 3,5-epimerase 1 OS=Oryza sativa subsp. japonica GN=GME-1 PE=1 SV=1"
Capana12g002820	UGPA_SOLTU UTP--glucose-1-phosphate uridylyltransferase OS=Solanum tuberosum PE=1 SV=3
Capana04g000900	"PGMC_SOLTU Phosphoglucomutase, cytoplasmic OS=Solanum tuberosum GN=PGM1 PE=2 SV=1"
Capana08g002001	XYL2_MEDSV Beta-xylosidase/alpha-L-arabinofuranosidase 2 OS=Medicago sativa subsp. varia GN=Xyl2 PE=2 SV=1
Capana00g003222	CHI5_ORYSJ Chitinase 5 OS=Oryza sativa subsp. japonica GN=Cht5 PE=2 SV=1
Capana03g000245	HXK1_TOBAC Hexokinase-1 OS=Nicotiana tabacum GN=HXK1 PE=2 SV=1
Capana01g001333	"GAUT1_ARATH Alpha-1,4-galacturonosyltransferase 1 OS=Arabidopsis thaliana GN=GAUT1 PE=1 SV=1"
Capana06g000734	SCRK2_SOLLC Fructokinase-2 OS=Solanum lycopersicum GN=FRK2 PE=2 SV=2
Capana08g000316	"SQD1_SPIOL UDP-sulfoquinovose synthase, chloroplastic OS=Spinacia oleracea GN=SQD1 PE=1 SV=1"
Capana05g001389	NCB5R_ARATH NADH-cytochrome b5 reductase-like protein OS=Arabidopsis thaliana GN=At5g20080 PE=1 SV=2
cann00561 Glycerolipid metabolism（8）
Capana09g001701	AKRC9_ARATH Aldo-keto reductase family 4 member C9 OS=Arabidopsis thaliana GN=AKR4C9 PE=1 SV=1
Capana03g000136	PDAT1_ARATH Phospholipid:diacylglycerol acyltransferase 1 OS=Arabidopsis thaliana GN=PDAT1 PE=2 SV=1
Capana08g000936	GPAT4_ARATH Glycerol-3-phosphate acyltransferase 4 OS=Arabidopsis thaliana GN=GPAT4 PE=1 SV=1
Capana06g001736	ALDH_CRAPL Aldehyde dehydrogenase OS=Craterostigma plantagineum GN=ALDH PE=1 SV=1
Capana03g000306	"GLYK_ARATH D-glycerate 3-kinase, chloroplastic OS=Arabidopsis thaliana GN=GLYK PE=1 SV=2"
Capana01g001121	"PLSB_CARTI Glycerol-3-phosphate acyltransferase, chloroplastic OS=Carthamus tinctorius PE=2 SV=1"
Capana03g000109	AL7A1_MALDO Aldehyde dehydrogenase family 7 member A1 OS=Malus domestica PE=1 SV=3
Capana08g000316	"SQD1_SPIOL UDP-sulfoquinovose synthase, chloroplastic OS=Spinacia oleracea GN=SQD1 PE=1 SV=1"
cann00562 Inositol phosphate metabolism（3）
Capana08g002681	"TPIC_SPIOL Triosephosphate isomerase, chloroplastic OS=Spinacia oleracea GN=TPIP1 PE=1 SV=1"
Capana05g000346	"TPIS_PETHY Triosephosphate isomerase, cytosolic OS=Petunia hybrida GN=TPIP1 PE=2 SV=1"
Capana12g002921	DPNP1_ARATH SAL1 phosphatase OS=Arabidopsis thaliana GN=SAL1 PE=1 SV=1
cann00564 Glycerophospholipid metabolism（3）
Capana02g002522	PLDD1_ARATH Phospholipase D delta OS=Arabidopsis thaliana GN=PLDDELTA PE=1 SV=2
Capana08g000936	GPAT4_ARATH Glycerol-3-phosphate acyltransferase 4 OS=Arabidopsis thaliana GN=GPAT4 PE=1 SV=1
Capana01g001121	"PLSB_CARTI Glycerol-3-phosphate acyltransferase, chloroplastic OS=Carthamus tinctorius PE=2 SV=1"
cann00565 Ether lipid metabolism（1）
Capana02g002522	PLDD1_ARATH Phospholipase D delta OS=Arabidopsis thaliana GN=PLDDELTA PE=1 SV=2
cann00590 Arachidonic acid metabolism（1）
Capana01g003981	"GPX7_ARATH Putative glutathione peroxidase 7, chloroplastic OS=Arabidopsis thaliana GN=GPX7 PE=2 SV=2"
cann00591 Linoleic acid metabolism（1）
Capana01g001578	"LOX21_SOLTU Linoleate 13S-lipoxygenase 2-1, chloroplastic OS=Solanum tuberosum GN=LOX2.1 PE=1 SV=1"
cann00592 alpha-Linolenic acid metabolism（5）
Capana01g001578	"LOX21_SOLTU Linoleate 13S-lipoxygenase 2-1, chloroplastic OS=Solanum tuberosum GN=LOX2.1 PE=1 SV=1"
Capana03g004369	"THIK2_ARATH 3-ketoacyl-CoA thiolase 2, peroxisomal OS=Arabidopsis thaliana GN=PED1 PE=1 SV=2"
Capana11g000038	"CP74_LINUS Allene oxide synthase, chloroplastic OS=Linum usitatissimum GN=CYP74A PE=1 SV=1"
Capana10g000325	"ACOX3_ARATH Acyl-coenzyme A oxidase 3, peroxisomal OS=Arabidopsis thaliana GN=ACX3 PE=1 SV=1"
Capana03g003512	"CP74_LINUS Allene oxide synthase, chloroplastic OS=Linum usitatissimum GN=CYP74A PE=1 SV=1"
cann00600 Sphingolipid metabolism（1）
Capana03g004052	"GSHRC_PEA Glutathione reductase, cytosolic OS=Pisum sativum PE=2 SV=1"
cann00620 Pyruvate metabolism（17）
Capana05g002207	DLDH_SYNY3 Dihydrolipoyl dehydrogenase OS=Synechocystis sp. (strain PCC 6803 / Kazusa) GN=lpdA PE=1 SV=3
Capana07g001845	CAPP2_MESCR Phosphoenolpyruvate carboxylase 2 OS=Mesembryanthemum crystallinum GN=PPC2 PE=3 SV=1
Capana03g003831	"MDHC_MAIZE Malate dehydrogenase, cytoplasmic OS=Zea mays PE=2 SV=2"
Capana03g001353	"MASY_GOSHI Malate synthase, glyoxysomal OS=Gossypium hirsutum PE=2 SV=1"
Capana05g002227	"DLDH1_ARATH Dihydrolipoyl dehydrogenase 1, mitochondrial OS=Arabidopsis thaliana GN=LPD1 PE=1 SV=2"
Capana11g001474	"ODPA_SOLTU Pyruvate dehydrogenase E1 component subunit alpha, mitochondrial OS=Solanum tuberosum PE=1 SV=1"
Capana01g003067	"PPDK_MESCR Pyruvate, phosphate dikinase, chloroplastic OS=Mesembryanthemum crystallinum GN=PPD PE=2 SV=1"
Capana07g001847	CAPP1_ARATH Phosphoenolpyruvate carboxylase 1 OS=Arabidopsis thaliana GN=PPC1 PE=1 SV=1
Capana08g001599	DLDH_SYNY3 Dihydrolipoyl dehydrogenase OS=Synechocystis sp. (strain PCC 6803 / Kazusa) GN=lpdA PE=1 SV=3
Capana03g002084	"KPYG_TOBAC Pyruvate kinase isozyme G, chloroplastic OS=Nicotiana tabacum PE=2 SV=1"
Capana04g001609	ODP2_ZYMMO Dihydrolipoyllysine-residue acetyltransferase component of pyruvate dehydrogenase complex OS=Zymomonas mobilis (strain ATCC 31821 / ZM4 / CP4) GN=pdhC PE=3 SV=2
Capana06g001736	ALDH_CRAPL Aldehyde dehydrogenase OS=Craterostigma plantagineum GN=ALDH PE=1 SV=1
Capana12g002455	"MDHP_MEDSA Malate dehydrogenase [NADP], chloroplastic OS=Medicago sativa GN=MDH1 PE=2 SV=1"
Capana02g000197	"KPYC_SOYBN Pyruvate kinase, cytosolic isozyme OS=Glycine max PE=2 SV=1"
Capana03g000109	AL7A1_MALDO Aldehyde dehydrogenase family 7 member A1 OS=Malus domestica PE=1 SV=3
Capana02g002206	LGUL_ORYSJ Lactoylglutathione lyase OS=Oryza sativa subsp. japonica GN=GLX-I PE=1 SV=2
Capana07g000051	"OPD23_ARATH Dihydrolipoyllysine-residue acetyltransferase component 3 of pyruvate dehydrogenase complex, mitochondrial OS=Arabidopsis thaliana GN=At1g54220 PE=1 SV=1"
cann00630 Glyoxylate and dicarboxylate metabolism（32）
Capana05g002207	DLDH_SYNY3 Dihydrolipoyl dehydrogenase OS=Synechocystis sp. (strain PCC 6803 / Kazusa) GN=lpdA PE=1 SV=3
Capana00g005036	"GLTB1_ARATH Ferredoxin-dependent glutamate synthase 1, chloroplastic OS=Arabidopsis thaliana GN=GLU1 PE=1 SV=2"
Capana08g002744	DHGY_CUCSA Glycerate dehydrogenase OS=Cucumis sativus GN=HPR-A PE=2 SV=1
Capana03g003831	"MDHC_MAIZE Malate dehydrogenase, cytoplasmic OS=Zea mays PE=2 SV=2"
Capana12g000479	"GCSP_SOLTU Glycine dehydrogenase [decarboxylating], mitochondrial OS=Solanum tuberosum GN=GDCSP PE=2 SV=1"
Capana08g002743	DHGY_CUCSA Glycerate dehydrogenase OS=Cucumis sativus GN=HPR-A PE=2 SV=1
Capana01g003049	"GLNA2_DAUCA Glutamine synthetase, chloroplastic OS=Daucus carota GN=GLN2 PE=2 SV=1"
Capana02g000541	"RBS_CAPAN Ribulose bisphosphate carboxylase small chain, chloroplastic OS=Capsicum annuum GN=RBCS PE=2 SV=1"
Capana02g003489	"FDH_SOLTU Formate dehydrogenase, mitochondrial OS=Solanum tuberosum GN=FDH1 PE=1 SV=2"
Capana07g001429	"ACOC_CUCMA Aconitate hydratase, cytoplasmic OS=Cucurbita maxima PE=2 SV=1"
Capana03g001353	"MASY_GOSHI Malate synthase, glyoxysomal OS=Gossypium hirsutum PE=2 SV=1"
Capana05g002227	"DLDH1_ARATH Dihydrolipoyl dehydrogenase 1, mitochondrial OS=Arabidopsis thaliana GN=LPD1 PE=1 SV=2"
Capana10g000134	GOX_SPIOL Peroxisomal (S)-2-hydroxy-acid oxidase OS=Spinacia oleracea PE=1 SV=1
Capana02g002887	"GLYM_SOLTU Serine hydroxymethyltransferase, mitochondrial OS=Solanum tuberosum PE=2 SV=1"
Capana12g000116	SGAT_ARATH Serine--glyoxylate aminotransferase OS=Arabidopsis thaliana GN=AGT1 PE=1 SV=2
Capana12g002501	PGP_BOVIN Phosphoglycolate phosphatase OS=Bos taurus GN=PGP PE=2 SV=1
Capana08g000412	"GLYM_ARATH Serine hydroxymethyltransferase, mitochondrial OS=Arabidopsis thaliana GN=SHM1 PE=1 SV=1"
Capana05g001871	RBL_DEPGR Ribulose bisphosphate carboxylase large chain (Fragment) OS=Deppea grandiflora GN=rbcL PE=3 SV=1
Capana07g001441	"ACOC_CUCMA Aconitate hydratase, cytoplasmic OS=Cucurbita maxima PE=2 SV=1"
Capana00g005037	"GLTB_SPIOL Ferredoxin-dependent glutamate synthase, chloroplastic OS=Spinacia oleracea PE=1 SV=3"
Capana06g001561	"GCSH_FLAAN Glycine cleavage system H protein, mitochondrial OS=Flaveria anomala GN=GDCSH PE=2 SV=1"
Capana03g000163	GLYR1_CHICK Putative oxidoreductase GLYR1 OS=Gallus gallus GN=GLYR1 PE=2 SV=1
Capana05g000857	GLNA_NICPL Glutamine synthetase OS=Nicotiana plumbaginifolia PE=2 SV=1
Capana08g001599	DLDH_SYNY3 Dihydrolipoyl dehydrogenase OS=Synechocystis sp. (strain PCC 6803 / Kazusa) GN=lpdA PE=1 SV=3
Capana08g000323	"GCSP_SOLTU Glycine dehydrogenase [decarboxylating], mitochondrial OS=Solanum tuberosum GN=GDCSP PE=2 SV=1"
Capana02g002219	"GCST_SOLTU Aminomethyltransferase, mitochondrial OS=Solanum tuberosum GN=GDCST PE=2 SV=1"
Capana03g000306	"GLYK_ARATH D-glycerate 3-kinase, chloroplastic OS=Arabidopsis thaliana GN=GLYK PE=1 SV=2"
Capana00g003043	"CYSZ_CUCMA Citrate synthase, glyoxysomal OS=Cucurbita maxima PE=1 SV=1"
Capana01g003224	"CISY_DAUCA Citrate synthase, mitochondrial OS=Daucus carota GN=CS PE=2 SV=1"
Capana02g001195	"GCSH_FLAAN Glycine cleavage system H protein, mitochondrial OS=Flaveria anomala GN=GDCSH PE=2 SV=1"
Capana00g000453	"GCSH_FLAAN Glycine cleavage system H protein, mitochondrial OS=Flaveria anomala GN=GDCSH PE=2 SV=1"
Capana05g000208	GLN11_ORYSJ Glutamine synthetase cytosolic isozyme 1-1 OS=Oryza sativa subsp. japonica GN=GLN1-1 PE=1 SV=1
cann00640 Propanoate metabolism（6）
Capana05g002207	DLDH_SYNY3 Dihydrolipoyl dehydrogenase OS=Synechocystis sp. (strain PCC 6803 / Kazusa) GN=lpdA PE=1 SV=3
Capana05g002227	"DLDH1_ARATH Dihydrolipoyl dehydrogenase 1, mitochondrial OS=Arabidopsis thaliana GN=LPD1 PE=1 SV=2"
Capana02g000308	"SUCA2_SOLLC Succinyl-CoA ligase [ADP-forming] subunit alpha-2, mitochondrial OS=Solanum lycopersicum PE=1 SV=1"
Capana01g002460	"ODB2_HUMAN Lipoamide acyltransferase component of branched-chain alpha-keto acid dehydrogenase complex, mitochondrial OS=Homo sapiens GN=DBT PE=1 SV=3"
Capana08g001599	DLDH_SYNY3 Dihydrolipoyl dehydrogenase OS=Synechocystis sp. (strain PCC 6803 / Kazusa) GN=lpdA PE=1 SV=3
Capana10g000325	"ACOX3_ARATH Acyl-coenzyme A oxidase 3, peroxisomal OS=Arabidopsis thaliana GN=ACX3 PE=1 SV=1"
cann00650 Butanoate metabolism（3）
Capana12g002824	DCE_PETHY Glutamate decarboxylase OS=Petunia hybrida GN=GAD PE=1 SV=1
Capana03g000163	GLYR1_CHICK Putative oxidoreductase GLYR1 OS=Gallus gallus GN=GLYR1 PE=2 SV=1
Capana03g003941	"SSDH_ARATH Succinate-semialdehyde dehydrogenase, mitochondrial OS=Arabidopsis thaliana GN=ALDH5F1 PE=1 SV=2"
cann00660 C5-Branched dibasic acid metabolism（2）
Capana04g002823	LEUC_ARATH 3-isopropylmalate dehydratase OS=Arabidopsis thaliana GN=IIL1 PE=2 SV=1
Capana00g002624	"LEU32_ARATH 3-isopropylmalate dehydrogenase 2, chloroplastic OS=Arabidopsis thaliana GN=IMDH2 PE=1 SV=1"
cann00670 One carbon pool by folate（6）
Capana12g002614	MTHR2_ARATH Methylenetetrahydrofolate reductase 2 OS=Arabidopsis thaliana GN=MTHFR2 PE=1 SV=2
Capana01g000988	PUR9_LISMF Bifunctional purine biosynthesis protein PurH OS=Listeria monocytogenes serotype 4b (strain F2365) GN=purH PE=3 SV=1
Capana02g002887	"GLYM_SOLTU Serine hydroxymethyltransferase, mitochondrial OS=Solanum tuberosum PE=2 SV=1"
Capana08g000412	"GLYM_ARATH Serine hydroxymethyltransferase, mitochondrial OS=Arabidopsis thaliana GN=SHM1 PE=1 SV=1"
Capana02g002219	"GCST_SOLTU Aminomethyltransferase, mitochondrial OS=Solanum tuberosum GN=GDCST PE=2 SV=1"
Capana01g001551	FTHS_SPIOL Formate--tetrahydrofolate ligase OS=Spinacia oleracea PE=1 SV=3
cann00710 Carbon fixation in photosynthetic organisms（31）
Capana00g001096	"G3PC_PETHY Glyceraldehyde-3-phosphate dehydrogenase, cytosolic OS=Petunia hybrida GN=GAPC PE=2 SV=1"
Capana02g000067	"TKTC_SOLTU Transketolase, chloroplastic OS=Solanum tuberosum PE=2 SV=1"
Capana07g001845	CAPP2_MESCR Phosphoenolpyruvate carboxylase 2 OS=Mesembryanthemum crystallinum GN=PPC2 PE=3 SV=1
Capana03g003831	"MDHC_MAIZE Malate dehydrogenase, cytoplasmic OS=Zea mays PE=2 SV=2"
Capana02g000541	"RBS_CAPAN Ribulose bisphosphate carboxylase small chain, chloroplastic OS=Capsicum annuum GN=RBCS PE=2 SV=1"
Capana09g001643	"F16P1_ARATH Fructose-1,6-bisphosphatase, chloroplastic OS=Arabidopsis thaliana GN=FBP PE=1 SV=2"
Capana07g002419	"ALF1_PEA Fructose-bisphosphate aldolase, cytoplasmic isozyme 1 OS=Pisum sativum PE=2 SV=1"
Capana08g002681	"TPIC_SPIOL Triosephosphate isomerase, chloroplastic OS=Spinacia oleracea GN=TPIP1 PE=1 SV=1"
Capana08g002624	"ALFC2_ARATH Probable fructose-bisphosphate aldolase 2, chloroplastic OS=Arabidopsis thaliana GN=FBA2 PE=1 SV=2"
Capana07g002456	"PGKH_TOBAC Phosphoglycerate kinase, chloroplastic OS=Nicotiana tabacum PE=2 SV=1"
Capana02g002621	"ALFC2_ARATH Probable fructose-bisphosphate aldolase 2, chloroplastic OS=Arabidopsis thaliana GN=FBA2 PE=1 SV=2"
Capana05g001871	RBL_DEPGR Ribulose bisphosphate carboxylase large chain (Fragment) OS=Deppea grandiflora GN=rbcL PE=3 SV=1
Capana04g000059	"G3PB_PEA Glyceraldehyde-3-phosphate dehydrogenase B, chloroplastic OS=Pisum sativum GN=GAPB PE=2 SV=2"
Capana06g000896	"G3PC_PETHY Glyceraldehyde-3-phosphate dehydrogenase, cytosolic OS=Petunia hybrida GN=GAPC PE=2 SV=1"
Capana01g003067	"PPDK_MESCR Pyruvate, phosphate dikinase, chloroplastic OS=Mesembryanthemum crystallinum GN=PPD PE=2 SV=1"
Capana01g000893	"KPPR_WHEAT Phosphoribulokinase, chloroplastic OS=Triticum aestivum PE=2 SV=1"
Capana11g002347	"ALFC3_ARATH Probable fructose-bisphosphate aldolase 3, chloroplastic OS=Arabidopsis thaliana GN=FBA3 PE=1 SV=1"
Capana04g001331	"F16P2_SOLTU Fructose-1,6-bisphosphatase, cytosolic OS=Solanum tuberosum PE=2 SV=1"
Capana12g000555	"G3PB_ARATH Glyceraldehyde-3-phosphate dehydrogenase B, chloroplastic OS=Arabidopsis thaliana GN=GAPB PE=1 SV=2"
Capana05g000346	"TPIS_PETHY Triosephosphate isomerase, cytosolic OS=Petunia hybrida GN=TPIP1 PE=2 SV=1"
Capana10g001955	ALF_ORYSJ Fructose-bisphosphate aldolase cytoplasmic isozyme OS=Oryza sativa subsp. japonica GN=FBA PE=1 SV=2
Capana05g001001	"TKTC_SOLTU Transketolase, chloroplastic OS=Solanum tuberosum PE=2 SV=1"
Capana05g002020	"S17P_SPIOL Sedoheptulose-1,7-bisphosphatase, chloroplastic OS=Spinacia oleracea PE=2 SV=1"
Capana07g001847	CAPP1_ARATH Phosphoenolpyruvate carboxylase 1 OS=Arabidopsis thaliana GN=PPC1 PE=1 SV=1
Capana02g000489	"ALFC2_ARATH Probable fructose-bisphosphate aldolase 2, chloroplastic OS=Arabidopsis thaliana GN=FBA2 PE=1 SV=2"
Capana03g000806	"RPE_SOLTU Ribulose-phosphate 3-epimerase, chloroplastic (Fragment) OS=Solanum tuberosum PE=1 SV=1"
Capana07g002457	"PGKY_TOBAC Phosphoglycerate kinase, cytosolic OS=Nicotiana tabacum PE=2 SV=1"
Capana12g002455	"MDHP_MEDSA Malate dehydrogenase [NADP], chloroplastic OS=Medicago sativa GN=MDH1 PE=2 SV=1"
Capana10g000224	G3P_HOMAM Glyceraldehyde-3-phosphate dehydrogenase OS=Homarus americanus PE=1 SV=2
Capana12g001220	"F16P2_SOLTU Fructose-1,6-bisphosphatase, cytosolic OS=Solanum tuberosum PE=2 SV=1"
Capana07g000319	"G3PA_TOBAC Glyceraldehyde-3-phosphate dehydrogenase A, chloroplastic (Fragment) OS=Nicotiana tabacum GN=GAPA PE=2 SV=1"
cann00730 Thiamine metabolism（2）
Capana06g001357	"KADC2_ARATH Probable adenylate kinase 2, chloroplastic OS=Arabidopsis thaliana GN=At5g47840 PE=2 SV=1"
Capana00g004151	"THI41_VITVI Thiamine thiazole synthase 1, chloroplastic OS=Vitis vinifera GN=THI1-1 PE=3 SV=1"
cann00740 Riboflavin metabolism（2）
Capana12g000402	"RISB_ARATH 6,7-dimethyl-8-ribityllumazine synthase, chloroplastic OS=Arabidopsis thaliana GN=At2g44050 PE=2 SV=1"
Capana08g000907	RIBD_SYNY3 Riboflavin biosynthesis protein RibD OS=Synechocystis sp. (strain PCC 6803 / Kazusa) GN=ribD PE=3 SV=1
cann00750 Vitamin B6 metabolism（2）
Capana06g001195	"THRC_SOLTU Threonine synthase, chloroplastic OS=Solanum tuberosum PE=2 SV=1"
Capana03g000142	"THRC_SOLTU Threonine synthase, chloroplastic OS=Solanum tuberosum PE=2 SV=1"
cann00770 Pantothenate and CoA biosynthesis（2）
Capana00g003542	"ILV5_ARATH Ketol-acid reductoisomerase, chloroplastic OS=Arabidopsis thaliana GN=At3g58610 PE=2 SV=2"
Capana02g002928	"BCAT5_ARATH Branched-chain-amino-acid aminotransferase 5, chloroplastic OS=Arabidopsis thaliana GN=BCAT5 PE=1 SV=1"
cann00790 Folate biosynthesis（1）
Capana05g000037	FOLB1_ARATH Dihydroneopterin aldolase OS=Arabidopsis thaliana GN=FOLB1 PE=1 SV=1
cann00860 Porphyrin and chlorophyll metabolism（7）
Capana00g004560	"POR_DAUCA Protochlorophyllide reductase, chloroplastic OS=Daucus carota GN=POR1 PE=2 SV=1"
Capana03g001893	"GSA_SOLLC Glutamate-1-semialdehyde 2,1-aminomutase, chloroplastic OS=Solanum lycopersicum PE=2 SV=1"
Capana04g000804	"HEM11_CUCSA Glutamyl-tRNA reductase 1, chloroplastic OS=Cucumis sativus GN=HEMA1 PE=2 SV=1"
Capana03g000791	"CHLP_TOBAC Geranylgeranyl diphosphate reductase, chloroplastic OS=Nicotiana tabacum GN=CHLP PE=2 SV=1"
Capana10g002504	"CRD1_GOSHI Magnesium-protoporphyrin IX monomethyl ester [oxidative] cyclase, chloroplastic OS=Gossypium hirsutum GN=CRD1 PE=2 SV=2"
Capana10g000740	"HEM6_TOBAC Coproporphyrinogen-III oxidase, chloroplastic OS=Nicotiana tabacum GN=CPX PE=2 SV=1"
Capana00g002830	"HEM2_ARATH Delta-aminolevulinic acid dehydratase, chloroplastic OS=Arabidopsis thaliana GN=HEMB PE=1 SV=1"
cann00900 Terpenoid backbone biosynthesis（9）
Capana03g000791	"CHLP_TOBAC Geranylgeranyl diphosphate reductase, chloroplastic OS=Nicotiana tabacum GN=CHLP PE=2 SV=1"
Capana01g001814	"ISPE_SOLLC 4-diphosphocytidyl-2-C-methyl-D-erythritol kinase, chloroplastic/chromoplastic (Fragment) OS=Solanum lycopersicum GN=ISPE PE=1 SV=1"
Capana03g000964	"DXR_MENPI 1-deoxy-D-xylulose 5-phosphate reductoisomerase, chloroplastic OS=Mentha piperita GN=DXR PE=2 SV=2"
Capana11g000087	ISPG_PARUW 4-hydroxy-3-methylbut-2-en-1-yl diphosphate synthase OS=Protochlamydia amoebophila (strain UWE25) GN=ispG PE=3 SV=1
Capana03g003135	FPPS1_LUPAL Farnesyl pyrophosphate synthase 1 OS=Lupinus albus GN=FPS1 PE=2 SV=1
Capana08g002507	ISPH_ANAVT 4-hydroxy-3-methylbut-2-enyl diphosphate reductase OS=Anabaena variabilis (strain ATCC 29413 / PCC 7937) GN=ispH PE=3 SV=1
Capana05g002500	IDI2_CAMAC Isopentenyl-diphosphate Delta-isomerase II OS=Camptotheca acuminata GN=IPI2 PE=2 SV=1
Capana01g000174	"ISPF_CATRO 2-C-methyl-D-erythritol 2,4-cyclodiphosphate synthase, chloroplastic OS=Catharanthus roseus GN=ISPF PE=2 SV=1"
Capana08g000960	FACE1_ARATH CAAX prenyl protease 1 homolog OS=Arabidopsis thaliana GN=FACE1 PE=1 SV=1
cann00903 Limonene and pinene degradation（1）
Capana06g001736	ALDH_CRAPL Aldehyde dehydrogenase OS=Craterostigma plantagineum GN=ALDH PE=1 SV=1
cann00906 Carotenoid biosynthesis（2）
Capana11g000472	ALDO4_ARATH Aldehyde oxidase 4 OS=Arabidopsis thaliana GN=AAO4 PE=2 SV=2
Capana00g003085	ABA2_ARATH Xanthoxin dehydrogenase OS=Arabidopsis thaliana GN=ABA2 PE=1 SV=1
cann00910 Nitrogen metabolism（9）
Capana00g005036	"GLTB1_ARATH Ferredoxin-dependent glutamate synthase 1, chloroplastic OS=Arabidopsis thaliana GN=GLU1 PE=1 SV=2"
Capana01g003049	"GLNA2_DAUCA Glutamine synthetase, chloroplastic OS=Daucus carota GN=GLN2 PE=2 SV=1"
Capana02g003498	"CAHC_TOBAC Carbonic anhydrase, chloroplastic OS=Nicotiana tabacum PE=2 SV=1"
Capana00g005037	"GLTB_SPIOL Ferredoxin-dependent glutamate synthase, chloroplastic OS=Spinacia oleracea PE=1 SV=3"
Capana11g001282	"CAHC_TOBAC Carbonic anhydrase, chloroplastic OS=Nicotiana tabacum PE=2 SV=1"
Capana08g002393	"NIR_ARATH Ferredoxin--nitrite reductase, chloroplastic OS=Arabidopsis thaliana GN=NIR1 PE=1 SV=1"
Capana05g000857	GLNA_NICPL Glutamine synthetase OS=Nicotiana plumbaginifolia PE=2 SV=1
Capana03g003890	CYNS_MEDTR Cyanate hydratase OS=Medicago truncatula GN=CYN PE=2 SV=1
Capana05g000208	GLN11_ORYSJ Glutamine synthetase cytosolic isozyme 1-1 OS=Oryza sativa subsp. japonica GN=GLN1-1 PE=1 SV=1
cann00920 Sulfur metabolism（4）
Capana00g001018	SIR_SYNY3 Sulfite reductase [ferredoxin] OS=Synechocystis sp. (strain PCC 6803 / Kazusa) GN=sir PE=1 SV=1
Capana03g004628	"APS1_ARATH ATP sulfurylase 1, chloroplastic OS=Arabidopsis thaliana GN=APS1 PE=1 SV=1"
Capana03g003700	CYSK_SOLTU Cysteine synthase OS=Solanum tuberosum PE=2 SV=1
Capana12g002921	DPNP1_ARATH SAL1 phosphatase OS=Arabidopsis thaliana GN=SAL1 PE=1 SV=1
cann00940 Phenylpropanoid biosynthesis（4）
Capana03g001811	COMT1_CAPAN Caffeic acid 3-O-methyltransferase OS=Capsicum annuum GN=COMT PE=2 SV=2
Capana05g000110	GLUA_DICDI Lysosomal beta glucosidase OS=Dictyostelium discoideum GN=gluA PE=1 SV=2
Capana06g000675	GLUA_DICDI Lysosomal beta glucosidase OS=Dictyostelium discoideum GN=gluA PE=1 SV=2
Capana06g000681	GLUA_DICDI Lysosomal beta glucosidase OS=Dictyostelium discoideum GN=gluA PE=1 SV=2
cann00950 Isoquinoline alkaloid biosynthesis（1）
Capana08g000430	"AAT5_ARATH Aspartate aminotransferase, chloroplastic OS=Arabidopsis thaliana GN=ASP5 PE=1 SV=2"
cann00960 Tropane, piperidine and pyridine alkaloid biosynthesis（2）
Capana08g000430	"AAT5_ARATH Aspartate aminotransferase, chloroplastic OS=Arabidopsis thaliana GN=ASP5 PE=1 SV=2"
Capana09g001680	TRNH_DATST Tropinone reductase homolog OS=Datura stramonium PE=2 SV=1
cann00966 Glucosinolate biosynthesis（1）
Capana04g002823	LEUC_ARATH 3-isopropylmalate dehydratase OS=Arabidopsis thaliana GN=IIL1 PE=2 SV=1
cann00970 Aminoacyl-tRNA biosynthesis（13）
Capana10g002177	"SYNC1_ARATH Asparagine--tRNA ligase, cytoplasmic 1 OS=Arabidopsis thaliana GN=SYNC1 PE=2 SV=1"
Capana09g000191	SYR_SYNE7 Arginine--tRNA ligase OS=Synechococcus elongatus (strain PCC 7942) GN=argS PE=3 SV=2
Capana11g002318	SYC_PELPD Cysteine--tRNA ligase OS=Pelobacter propionicus (strain DSM 2379) GN=cysS PE=3 SV=1
Capana05g002269	SYM_ARATH Probable methionine--tRNA ligase OS=Arabidopsis thaliana GN=At4g13780 PE=2 SV=1
Capana06g000721	SYK_ARATH Lysine--tRNA ligase OS=Arabidopsis thaliana GN=At3g11710 PE=2 SV=1
Capana08g002533	SYFA_ARATH Probable phenylalanine--tRNA ligase alpha subunit OS=Arabidopsis thaliana GN=At4g39280 PE=2 SV=3
Capana03g003141	SYV_PROMM Valine--tRNA ligase OS=Prochlorococcus marinus (strain MIT 9313) GN=valS PE=3 SV=2
Capana02g002247	SYL_SALRD Leucine--tRNA ligase OS=Salinibacter ruber (strain DSM 13855 / M31) GN=leuS PE=3 SV=1
Capana05g000554	"SYGM1_ARATH Glycine--tRNA ligase 1, mitochondrial OS=Arabidopsis thaliana GN=GLYRS-1 PE=2 SV=1"
Capana03g000624	"SYGM1_ARATH Glycine--tRNA ligase 1, mitochondrial OS=Arabidopsis thaliana GN=GLYRS-1 PE=2 SV=1"
Capana03g001430	"SYNO_ARATH Asparagine--tRNA ligase, chloroplastic/mitochondrial OS=Arabidopsis thaliana GN=SYNO PE=2 SV=3"
Capana08g000012	SYK_THEEB Lysine--tRNA ligase OS=Thermosynechococcus elongatus (strain BP-1) GN=lysS PE=3 SV=1
Capana08g002514	SYY_MIMIV Tyrosine--tRNA ligase OS=Acanthamoeba polyphaga mimivirus GN=YARS PE=1 SV=1
cann01040 Biosynthesis of unsaturated fatty acids（3）
Capana03g004369	"THIK2_ARATH 3-ketoacyl-CoA thiolase 2, peroxisomal OS=Arabidopsis thaliana GN=PED1 PE=1 SV=2"
Capana06g002092	"STAD_RICCO Acyl-[acyl-carrier-protein] desaturase, chloroplastic OS=Ricinus communis PE=1 SV=1"
Capana10g000325	"ACOX3_ARATH Acyl-coenzyme A oxidase 3, peroxisomal OS=Arabidopsis thaliana GN=ACX3 PE=1 SV=1"
cann01210 2-Oxocarboxylic acid metabolism（13）
Capana01g000323	"ARGD_ALNGL Acetylornithine aminotransferase, mitochondrial OS=Alnus glutinosa GN=AG118 PE=2 SV=1"
Capana08g002444	"ARGC_ARATH Probable N-acetyl-gamma-glutamyl-phosphate reductase, chloroplastic OS=Arabidopsis thaliana GN=At2g19940 PE=1 SV=2"
Capana08g000430	"AAT5_ARATH Aspartate aminotransferase, chloroplastic OS=Arabidopsis thaliana GN=ASP5 PE=1 SV=2"
Capana07g001429	"ACOC_CUCMA Aconitate hydratase, cytoplasmic OS=Cucurbita maxima PE=2 SV=1"
Capana00g003542	"ILV5_ARATH Ketol-acid reductoisomerase, chloroplastic OS=Arabidopsis thaliana GN=At3g58610 PE=2 SV=2"
Capana07g001441	"ACOC_CUCMA Aconitate hydratase, cytoplasmic OS=Cucurbita maxima PE=2 SV=1"
Capana04g002823	LEUC_ARATH 3-isopropylmalate dehydratase OS=Arabidopsis thaliana GN=IIL1 PE=2 SV=1
Capana02g002928	"BCAT5_ARATH Branched-chain-amino-acid aminotransferase 5, chloroplastic OS=Arabidopsis thaliana GN=BCAT5 PE=1 SV=1"
Capana01g001049	ARGE_DICDI Acetylornithine deacetylase OS=Dictyostelium discoideum GN=argE PE=1 SV=2
Capana00g003043	"CYSZ_CUCMA Citrate synthase, glyoxysomal OS=Cucurbita maxima PE=1 SV=1"
Capana01g003224	"CISY_DAUCA Citrate synthase, mitochondrial OS=Daucus carota GN=CS PE=2 SV=1"
Capana08g000010	IDHC_TOBAC Isocitrate dehydrogenase [NADP] OS=Nicotiana tabacum PE=2 SV=1
Capana00g002624	"LEU32_ARATH 3-isopropylmalate dehydrogenase 2, chloroplastic OS=Arabidopsis thaliana GN=IMDH2 PE=1 SV=1"
cann03008 Ribosome biogenesis in eukaryotes（1）
Capana09g000353	RAN3_ARATH GTP-binding nuclear protein Ran-3 OS=Arabidopsis thaliana GN=RAN3 PE=1 SV=2
cann03010 Ribosome（49）
Capana05g002511	"RK2B_COFAR 50S ribosomal protein L2-B, chloroplastic OS=Coffea arabica GN=rpl2-B PE=3 SV=1"
Capana02g001384	RLA0_SOYBN 60S acidic ribosomal protein P0 OS=Glycine max PE=2 SV=1
Capana12g000287	R13A4_ARATH 60S ribosomal protein L13a-4 OS=Arabidopsis thaliana GN=RPL13AD PE=2 SV=1
Capana03g002586	R35A3_ARATH 60S ribosomal protein L35a-3 OS=Arabidopsis thaliana GN=RPL35AC PE=2 SV=1
Capana01g002678	"RK1_ARATH 50S ribosomal protein L1, chloroplastic OS=Arabidopsis thaliana GN=RPL1 PE=1 SV=1"
Capana03g001371	RL172_ARATH 60S ribosomal protein L17-2 OS=Arabidopsis thaliana GN=RPL17B PE=2 SV=2
Capana04g000324	"RK31_ARATH 50S ribosomal protein L31, chloroplastic OS=Arabidopsis thaliana GN=RPL31 PE=1 SV=1"
Capana00g003268	RL192_ARATH 60S ribosomal protein L19-2 OS=Arabidopsis thaliana GN=RPL19B PE=2 SV=1
Capana03g000208	RL281_ARATH 60S ribosomal protein L28-1 OS=Arabidopsis thaliana GN=RPL28A PE=1 SV=1
Capana12g000446	RS6_ASPOF 40S ribosomal protein S6 OS=Asparagus officinalis GN=rps6 PE=2 SV=1
Capana06g000944	RL44_GOSHI 60S ribosomal protein L44 OS=Gossypium hirsutum GN=RPL44 PE=3 SV=3
Capana12g001992	RS18_ARATH 40S ribosomal protein S18 OS=Arabidopsis thaliana GN=RPS18A PE=1 SV=1
Capana01g002411	RL7A2_ARATH 60S ribosomal protein L7a-2 OS=Arabidopsis thaliana GN=RPL7AB PE=1 SV=1
Capana08g001965	RL3_ORYSJ 60S ribosomal protein L3 OS=Oryza sativa subsp. japonica GN=RPL3 PE=2 SV=2
Capana06g001411	RL18A_CASSA 60S ribosomal protein L18a OS=Castanea sativa GN=RPL18A PE=2 SV=1
Capana09g002116	"RK5_ARATH 50S ribosomal protein L5, chloroplastic OS=Arabidopsis thaliana GN=RPL5 PE=1 SV=1"
Capana08g001322	RS242_ARATH 40S ribosomal protein S24-2 OS=Arabidopsis thaliana GN=RPS24B PE=2 SV=2
Capana12g002517	RL38_SOLLC 60S ribosomal protein L38 OS=Solanum lycopersicum GN=RPL38 PE=3 SV=1
Capana06g000511	RL12_PRUAR 60S ribosomal protein L12 OS=Prunus armeniaca GN=RPL12 PE=2 SV=1
Capana09g001878	RL4A_ARATH 60S ribosomal protein L4-1 OS=Arabidopsis thaliana GN=RPL4A PE=2 SV=1
Capana01g001001	RL132_BRANA 60S ribosomal protein L13-2 OS=Brassica napus PE=2 SV=1
Capana06g000900	RL171_ARATH 60S ribosomal protein L17-1 OS=Arabidopsis thaliana GN=RPL17A PE=1 SV=1
Capana03g000291	"RR17_ARATH 30S ribosomal protein S17, chloroplastic OS=Arabidopsis thaliana GN=RPS17 PE=2 SV=1"
Capana03g001456	RSSA_DAUCA 40S ribosomal protein SA OS=Daucus carota GN=179B PE=2 SV=1
Capana06g000608	R10A1_ARATH 60S ribosomal protein L10a-1 OS=Arabidopsis thaliana GN=RPL10AA PE=2 SV=1
Capana05g000543	"RK10_TOBAC 50S ribosomal protein L10, chloroplastic OS=Nicotiana tabacum GN=RPL10 PE=2 SV=1"
Capana06g001719	RS22_ARATH 40S ribosomal protein S2-2 OS=Arabidopsis thaliana GN=RPS2B PE=2 SV=1
Capana11g002306	"RK15_PEA 50S ribosomal protein L15, chloroplastic (Fragment) OS=Pisum sativum GN=RPL15 PE=1 SV=1"
Capana02g000667	RL261_ARATH 60S ribosomal protein L26-1 OS=Arabidopsis thaliana GN=RPL26A PE=2 SV=2
Capana03g001207	R27A3_ARATH 60S ribosomal protein L27a-3 OS=Arabidopsis thaliana GN=RPL27AC PE=2 SV=2
Capana09g000715	RL8_SOLLC 60S ribosomal protein L8 OS=Solanum lycopersicum GN=RPL8 PE=2 SV=1
Capana08g001550	RL182_ARATH 60S ribosomal protein L18-2 OS=Arabidopsis thaliana GN=RPL18B PE=1 SV=2
Capana01g002397	"RR1_SPIOL 30S ribosomal protein S1, chloroplastic OS=Spinacia oleracea GN=RPS1 PE=1 SV=1"
Capana10g002009	RS142_ARATH 40S ribosomal protein S14-2 OS=Arabidopsis thaliana GN=RPS14B PE=1 SV=1
Capana02g003507	"RK12_NICSY 50S ribosomal protein L12, chloroplastic OS=Nicotiana sylvestris PE=2 SV=1"
Capana10g000170	"RR10_MESCR 30S ribosomal protein S10, chloroplastic OS=Mesembryanthemum crystallinum GN=RPS10 PE=2 SV=1"
Capana05g001598	RL34_TOBAC 60S ribosomal protein L34 OS=Nicotiana tabacum GN=RPL34 PE=2 SV=1
Capana01g003759	RL91_ARATH 60S ribosomal protein L9-1 OS=Arabidopsis thaliana GN=RPL9B PE=2 SV=3
Capana06g000853	RSSA_DAUCA 40S ribosomal protein SA OS=Daucus carota GN=179B PE=2 SV=1
Capana12g000207	"RK18_ARATH 50S ribosomal protein L18, chloroplastic OS=Arabidopsis thaliana GN=RPL18 PE=1 SV=1"
Capana06g000931	R27A3_ARATH 60S ribosomal protein L27a-3 OS=Arabidopsis thaliana GN=RPL27AC PE=2 SV=2
Capana08g001876	RS12_HORVU 40S ribosomal protein S12 OS=Hordeum vulgare GN=RPS12 PE=2 SV=1
Capana02g001443	RS4_SOLTU 40S ribosomal protein S4 OS=Solanum tuberosum GN=RPS4 PE=2 SV=1
Capana08g001136	RS202_ARATH 40S ribosomal protein S20-2 OS=Arabidopsis thaliana GN=RPS20B PE=2 SV=1
Capana10g000296	RL112_ARATH 60S ribosomal protein L11-2 OS=Arabidopsis thaliana GN=RPL11B PE=2 SV=2
Capana03g000843	RS193_ARATH 40S ribosomal protein S19-3 OS=Arabidopsis thaliana GN=RPS19C PE=2 SV=1
Capana02g001438	RL321_ARATH 60S ribosomal protein L32-1 OS=Arabidopsis thaliana GN=RPL32A PE=2 SV=2
Capana01g000694	"RK19_SPIOL 50S ribosomal protein L19, chloroplastic OS=Spinacia oleracea GN=RPL19 PE=1 SV=2"
Capana01g003217	"RK2_SOLTU 50S ribosomal protein L2, chloroplastic OS=Solanum tuberosum GN=rpl2-A PE=3 SV=1"
cann03013 RNA transport（16）
Capana08g000985	IF1A_ONOVI Eukaryotic translation initiation factor 1A OS=Onobrychis viciifolia PE=2 SV=2
Capana00g003563	NUA_ARATH Nuclear-pore anchor OS=Arabidopsis thaliana GN=NUA PE=1 SV=1
Capana00g000308	IF4E2_WHEAT Eukaryotic translation initiation factor 4E-2 OS=Triticum aestivum PE=1 SV=1
Capana04g001619	EIF3I_ARATH Eukaryotic translation initiation factor 3 subunit I OS=Arabidopsis thaliana GN=TIF3I1 PE=2 SV=2
Capana03g000354	STRAP_DICDI Serine-threonine kinase receptor-associated protein OS=Dictyostelium discoideum GN=strap PE=3 SV=1
Capana02g000557	MGN_ORYSJ Protein mago nashi homolog OS=Oryza sativa subsp. japonica GN=Os12g0287200 PE=2 SV=2
Capana09g000353	RAN3_ARATH GTP-binding nuclear protein Ran-3 OS=Arabidopsis thaliana GN=RAN3 PE=1 SV=2
Capana02g001944	EIF3D_ARATH Eukaryotic translation initiation factor 3 subunit D OS=Arabidopsis thaliana GN=TIF3D1 PE=1 SV=1
Capana06g001468	RH56_ARATH DEAD-box ATP-dependent RNA helicase 56 OS=Arabidopsis thaliana GN=RH56 PE=2 SV=2
Capana06g001395	RBM8A_SALSA RNA-binding protein 8A OS=Salmo salar GN=rbm8a PE=2 SV=1
Capana06g002575	EF1A_SOLLC Elongation factor 1-alpha OS=Solanum lycopersicum PE=2 SV=1
Capana12g000734	PABP2_ARATH Polyadenylate-binding protein 2 OS=Arabidopsis thaliana GN=PAB2 PE=1 SV=1
Capana08g000292	RH56_ARATH DEAD-box ATP-dependent RNA helicase 56 OS=Arabidopsis thaliana GN=RH56 PE=2 SV=2
Capana08g002337	PABP2_ARATH Polyadenylate-binding protein 2 OS=Arabidopsis thaliana GN=PAB2 PE=1 SV=1
Capana09g001946	EIF3A_TOBAC Eukaryotic translation initiation factor 3 subunit A OS=Nicotiana tabacum GN=TIF3A1 PE=2 SV=1
Capana02g003444	SEC13_MOUSE Protein SEC13 homolog OS=Mus musculus GN=Sec13 PE=2 SV=3
cann03015 mRNA surveillance pathway（9）
Capana03g000388	ERF3A_MOUSE Eukaryotic peptide chain release factor GTP-binding subunit ERF3A OS=Mus musculus GN=Gspt1 PE=1 SV=1
Capana02g000557	MGN_ORYSJ Protein mago nashi homolog OS=Oryza sativa subsp. japonica GN=Os12g0287200 PE=2 SV=2
Capana04g002829	RB27C_DROME Heterogeneous nuclear ribonucleoprotein 27C OS=Drosophila melanogaster GN=Hrb27C PE=1 SV=2
Capana06g001468	RH56_ARATH DEAD-box ATP-dependent RNA helicase 56 OS=Arabidopsis thaliana GN=RH56 PE=2 SV=2
Capana06g001395	RBM8A_SALSA RNA-binding protein 8A OS=Salmo salar GN=rbm8a PE=2 SV=1
Capana12g000734	PABP2_ARATH Polyadenylate-binding protein 2 OS=Arabidopsis thaliana GN=PAB2 PE=1 SV=1
Capana08g000292	RH56_ARATH DEAD-box ATP-dependent RNA helicase 56 OS=Arabidopsis thaliana GN=RH56 PE=2 SV=2
Capana08g002337	PABP2_ARATH Polyadenylate-binding protein 2 OS=Arabidopsis thaliana GN=PAB2 PE=1 SV=1
Capana03g003936	RB27C_DROME Heterogeneous nuclear ribonucleoprotein 27C OS=Drosophila melanogaster GN=Hrb27C PE=1 SV=2
cann03018 RNA degradation（9）
Capana03g004399	"CH62_CUCMA Chaperonin CPN60-2, mitochondrial OS=Cucurbita maxima GN=CPN60-2 PE=1 SV=1"
Capana09g000173	WDR61_DANRE WD repeat-containing protein 61 OS=Danio rerio GN=wdr61 PE=2 SV=1
Capana09g002348	ENO_SOLLC Enolase OS=Solanum lycopersicum GN=PGH1 PE=2 SV=1
Capana03g003441	LSM2_MOUSE U6 snRNA-associated Sm-like protein LSm2 OS=Mus musculus GN=Lsm2 PE=2 SV=1
Capana12g000734	PABP2_ARATH Polyadenylate-binding protein 2 OS=Arabidopsis thaliana GN=PAB2 PE=1 SV=1
Capana01g002025	"RUBB_PEA RuBisCO large subunit-binding protein subunit beta, chloroplastic OS=Pisum sativum PE=1 SV=2"
Capana08g002337	PABP2_ARATH Polyadenylate-binding protein 2 OS=Arabidopsis thaliana GN=PAB2 PE=1 SV=1
Capana03g000267	"RUBB_PEA RuBisCO large subunit-binding protein subunit beta, chloroplastic OS=Pisum sativum PE=1 SV=2"
Capana08g002169	"HSP7M_SOLTU Heat shock 70 kDa protein, mitochondrial OS=Solanum tuberosum GN=HSP68 PE=2 SV=1"
cann03030 DNA replication（1）
Capana01g000304	RFC2_BOVIN Replication factor C subunit 2 OS=Bos taurus GN=RFC2 PE=2 SV=1
cann03040 Spliceosome（12）
Capana08g001818	"HSP7S_PEA Stromal 70 kDa heat shock-related protein, chloroplastic OS=Pisum sativum GN=HSP70 PE=2 SV=1"
Capana09g001928	HSP72_SOLLC Heat shock cognate 70 kDa protein 2 OS=Solanum lycopersicum GN=HSC-2 PE=2 SV=1
Capana02g000557	MGN_ORYSJ Protein mago nashi homolog OS=Oryza sativa subsp. japonica GN=Os12g0287200 PE=2 SV=2
Capana12g001237	RH20_ARATH DEAD-box ATP-dependent RNA helicase 20 OS=Arabidopsis thaliana GN=RH20 PE=1 SV=1
Capana03g003441	LSM2_MOUSE U6 snRNA-associated Sm-like protein LSm2 OS=Mus musculus GN=Lsm2 PE=2 SV=1
Capana03g003924	PR19A_ARATH Pre-mRNA-processing factor 19 homolog 1 OS=Arabidopsis thaliana GN=PRP19A PE=1 SV=1
Capana06g001468	RH56_ARATH DEAD-box ATP-dependent RNA helicase 56 OS=Arabidopsis thaliana GN=RH56 PE=2 SV=2
Capana05g001504	SF3A1_ARATH Probable splicing factor 3A subunit 1 OS=Arabidopsis thaliana GN=At1g14650 PE=1 SV=2
Capana06g001395	RBM8A_SALSA RNA-binding protein 8A OS=Salmo salar GN=rbm8a PE=2 SV=1
Capana02g001973	SF3B2_HUMAN Splicing factor 3B subunit 2 OS=Homo sapiens GN=SF3B2 PE=1 SV=2
Capana08g000292	RH56_ARATH DEAD-box ATP-dependent RNA helicase 56 OS=Arabidopsis thaliana GN=RH56 PE=2 SV=2
Capana03g000552	HSP70_SOYBN Heat shock 70 kDa protein OS=Glycine max GN=HSP70 PE=3 SV=1
cann03050 Proteasome（6）
Capana05g002292	PSMD1_CHICK 26S proteasome non-ATPase regulatory subunit 1 OS=Gallus gallus GN=PSMD1 PE=2 SV=1
Capana12g001880	PSD12_DICDI 26S proteasome non-ATPase regulatory subunit 12 OS=Dictyostelium discoideum GN=psmD12 PE=2 SV=1
Capana00g004931	PRS7A_ARATH 26S protease regulatory subunit 7 homolog A OS=Arabidopsis thaliana GN=RPT1A PE=2 SV=1
Capana09g000153	PSA6_TOBAC Proteasome subunit alpha type-6 OS=Nicotiana tabacum GN=PAA1 PE=2 SV=1
Capana08g002723	PSA7_SOLLC Proteasome subunit alpha type-7 OS=Solanum lycopersicum GN=PAD1 PE=2 SV=1
Capana04g000331	PSA1A_ARATH Proteasome subunit alpha type-1-A OS=Arabidopsis thaliana GN=PAF1 PE=1 SV=3
cann03060 Protein export（4）
Capana07g000083	"SCY1_ARATH Preprotein translocase subunit SCY1, chloroplastic OS=Arabidopsis thaliana GN=SCY1 PE=1 SV=2"
Capana12g000083	SRP09_ARATH Signal recognition particle 9 kDa protein OS=Arabidopsis thaliana GN=SRP9 PE=2 SV=1
Capana08g001422	SPC3B_ARATH Signal peptidase complex subunit 3B OS=Arabidopsis thaliana GN=At5g27430 PE=2 SV=1
Capana08g001243	TATA_SYNP6 Sec-independent protein translocase protein TatA OS=Synechococcus sp. (strain ATCC 27144 / PCC 6301 / SAUG 1402/1) GN=tatA PE=3 SV=1
cann03420 Nucleotide excision repair（2）
Capana01g000304	RFC2_BOVIN Replication factor C subunit 2 OS=Bos taurus GN=RFC2 PE=2 SV=1
Capana05g001385	RD23C_ARATH Putative DNA repair protein RAD23-3 OS=Arabidopsis thaliana GN=RAD23-3 PE=2 SV=2
cann03430 Mismatch repair（1）
Capana01g000304	RFC2_BOVIN Replication factor C subunit 2 OS=Bos taurus GN=RFC2 PE=2 SV=1
cann04016 MAPK signaling pathway - plant（7）
Capana08g002025	AHM6_ARATH Putative copper-transporting ATPase PAA1 OS=Arabidopsis thaliana GN=PAA1 PE=2 SV=1
Capana06g000891	"NDK2_TOBAC Nucleoside diphosphate kinase 2, chloroplastic OS=Nicotiana tabacum GN=NDPK2 PE=1 SV=1"
Capana01g001047	PYR1_ARATH Abscisic acid receptor PYR1 OS=Arabidopsis thaliana GN=PYR1 PE=1 SV=1
Capana12g000499	PYL2_ARATH Abscisic acid receptor PYL2 OS=Arabidopsis thaliana GN=PYL2 PE=1 SV=1
Capana03g001387	"NDK2_TOBAC Nucleoside diphosphate kinase 2, chloroplastic OS=Nicotiana tabacum GN=NDPK2 PE=1 SV=1"
Capana11g000573	CALM_CAPAN Calmodulin OS=Capsicum annuum GN=CCM1 PE=2 SV=3
Capana00g003379	"NDK4_ARATH Nucleoside diphosphate kinase IV, chloroplastic/mitochondrial OS=Arabidopsis thaliana GN=NDK4 PE=1 SV=2"
cann04070 Phosphatidylinositol signaling system（2）
Capana12g002921	DPNP1_ARATH SAL1 phosphatase OS=Arabidopsis thaliana GN=SAL1 PE=1 SV=1
Capana11g000573	CALM_CAPAN Calmodulin OS=Capsicum annuum GN=CCM1 PE=2 SV=3
cann04075 Plant hormone signal transduction（2）
Capana01g001047	PYR1_ARATH Abscisic acid receptor PYR1 OS=Arabidopsis thaliana GN=PYR1 PE=1 SV=1
Capana12g000499	PYL2_ARATH Abscisic acid receptor PYL2 OS=Arabidopsis thaliana GN=PYL2 PE=1 SV=1
cann04120 Ubiquitin mediated proteolysis（2）
Capana08g002745	SKP1B_ARATH SKP1-like protein 1B OS=Arabidopsis thaliana GN=SKP1B PE=1 SV=1
Capana03g003924	PR19A_ARATH Pre-mRNA-processing factor 19 homolog 1 OS=Arabidopsis thaliana GN=PRP19A PE=1 SV=1
cann04141 Protein processing in endoplasmic reticulum（23）
Capana08g001818	"HSP7S_PEA Stromal 70 kDa heat shock-related protein, chloroplastic OS=Pisum sativum GN=HSP70 PE=2 SV=1"
Capana11g002133	ENPL_HORVU Endoplasmin homolog OS=Hordeum vulgare PE=2 SV=1
Capana11g000044	CDC48_CAPAN Cell division cycle protein 48 homolog OS=Capsicum annuum GN=CAFP PE=2 SV=1
Capana09g001928	HSP72_SOLLC Heat shock cognate 70 kDa protein 2 OS=Solanum lycopersicum GN=HSC-2 PE=2 SV=1
Capana01g002705	SC31A_CHICK Protein transport protein Sec31A OS=Gallus gallus GN=SEC31A PE=2 SV=1
Capana08g001595	PDIA6_MEDSA Probable protein disulfide-isomerase A6 OS=Medicago sativa PE=2 SV=1
Capana08g002745	SKP1B_ARATH SKP1-like protein 1B OS=Arabidopsis thaliana GN=SKP1B PE=1 SV=1
Capana06g001728	PDI_DATGL Protein disulfide-isomerase OS=Datisca glomerata GN=PDI PE=2 SV=1
Capana07g001239	HSP90_THEPA Heat shock protein 90 OS=Theileria parva GN=TP02_0244 PE=2 SV=2
Capana10g000190	HSP80_SOLLC Heat shock cognate protein 80 OS=Solanum lycopersicum GN=HSC80 PE=2 SV=1
Capana08g001603	CALR_NICPL Calreticulin OS=Nicotiana plumbaginifolia GN=CAL1 PE=2 SV=1
Capana05g001385	RD23C_ARATH Putative DNA repair protein RAD23-3 OS=Arabidopsis thaliana GN=RAD23-3 PE=2 SV=2
Capana07g002410	HSP80_SOLLC Heat shock cognate protein 80 OS=Solanum lycopersicum GN=HSC80 PE=2 SV=1
Capana07g000083	"SCY1_ARATH Preprotein translocase subunit SCY1, chloroplastic OS=Arabidopsis thaliana GN=SCY1 PE=1 SV=2"
Capana06g002615	PDI_DATGL Protein disulfide-isomerase OS=Datisca glomerata GN=PDI PE=2 SV=1
Capana04g000179	ENPL_CATRO Endoplasmin homolog OS=Catharanthus roseus GN=HSP90 PE=2 SV=1
Capana05g002198	PDI_DATGL Protein disulfide-isomerase OS=Datisca glomerata GN=PDI PE=2 SV=1
Capana03g000552	HSP70_SOYBN Heat shock 70 kDa protein OS=Glycine max GN=HSP70 PE=3 SV=1
Capana08g002518	OST48_DANRE Dolichyl-diphosphooligosaccharide--protein glycosyltransferase 48 kDa subunit OS=Danio rerio GN=ddost PE=2 SV=2
Capana03g000280	PDI16_ARATH Protein disulfide isomerase-like 1-6 OS=Arabidopsis thaliana GN=PDIL1-6 PE=1 SV=1
Capana08g002513	PLAP_MOUSE Phospholipase A-2-activating protein OS=Mus musculus GN=Plaa PE=2 SV=4
Capana02g001646	STLP2_ARATH SEC12-like protein 2 OS=Arabidopsis thaliana GN=STL2P PE=1 SV=4
Capana02g003444	SEC13_MOUSE Protein SEC13 homolog OS=Mus musculus GN=Sec13 PE=2 SV=3
cann04144 Endocytosis（8）
Capana08g001818	"HSP7S_PEA Stromal 70 kDa heat shock-related protein, chloroplastic OS=Pisum sativum GN=HSP70 PE=2 SV=1"
Capana06g000596	VPS4_YEAST Vacuolar protein sorting-associated protein 4 OS=Saccharomyces cerevisiae (strain ATCC 204508 / S288c) GN=VPS4 PE=1 SV=1
Capana03g001110	VPS29_ARATH Vacuolar protein sorting-associated protein 29 OS=Arabidopsis thaliana GN=VPS29 PE=2 SV=1
Capana09g001928	HSP72_SOLLC Heat shock cognate 70 kDa protein 2 OS=Solanum lycopersicum GN=HSC-2 PE=2 SV=1
Capana02g002522	PLDD1_ARATH Phospholipase D delta OS=Arabidopsis thaliana GN=PLDDELTA PE=1 SV=2
Capana04g002355	VP35B_ARATH Vacuolar protein sorting-associated protein 35B OS=Arabidopsis thaliana GN=VPS35B PE=1 SV=1
Capana09g002441	SNX1_ARATH Sorting nexin 1 OS=Arabidopsis thaliana GN=SNX1 PE=1 SV=1
Capana03g000552	HSP70_SOYBN Heat shock 70 kDa protein OS=Glycine max GN=HSP70 PE=3 SV=1
cann04145 Phagosome（9）
Capana04g000187	TBB2_SOLTU Tubulin beta-2 chain OS=Solanum tuberosum GN=TUBB2 PE=2 SV=1
Capana04g000783	TBA_PRUDU Tubulin alpha chain OS=Prunus dulcis GN=TUBA PE=2 SV=1
Capana12g001027	VATA_DAUCA V-type proton ATPase catalytic subunit A OS=Daucus carota PE=2 SV=1
Capana08g001603	CALR_NICPL Calreticulin OS=Nicotiana plumbaginifolia GN=CAL1 PE=2 SV=1
Capana07g000083	"SCY1_ARATH Preprotein translocase subunit SCY1, chloroplastic OS=Arabidopsis thaliana GN=SCY1 PE=1 SV=2"
Capana08g002759	VATB1_GOSHI V-type proton ATPase subunit B 1 OS=Gossypium hirsutum PE=2 SV=1
Capana12g001493	VATG1_TOBAC V-type proton ATPase subunit G 1 OS=Nicotiana tabacum GN=VATG1 PE=3 SV=1
Capana02g001139	VATF_ARATH V-type proton ATPase subunit F OS=Arabidopsis thaliana GN=VHA-F PE=2 SV=1
Capana00g000559	VATE_CITLI V-type proton ATPase subunit E OS=Citrus limon GN=VATE PE=2 SV=1
cann04146 Peroxisome（10）
Capana00g002110	"LACS7_ARATH Long chain acyl-CoA synthetase 7, peroxisomal OS=Arabidopsis thaliana GN=LACS7 PE=1 SV=2"
Capana10g000134	GOX_SPIOL Peroxisomal (S)-2-hydroxy-acid oxidase OS=Spinacia oleracea PE=1 SV=1
Capana12g000116	SGAT_ARATH Serine--glyoxylate aminotransferase OS=Arabidopsis thaliana GN=AGT1 PE=1 SV=2
Capana06g002374	"SODF_NICPL Superoxide dismutase [Fe], chloroplastic (Fragment) OS=Nicotiana plumbaginifolia GN=SODB PE=2 SV=1"
Capana03g004369	"THIK2_ARATH 3-ketoacyl-CoA thiolase 2, peroxisomal OS=Arabidopsis thaliana GN=PED1 PE=1 SV=2"
Capana01g002806	LACS1_ARATH Long chain acyl-CoA synthetase 1 OS=Arabidopsis thaliana GN=LACS1 PE=2 SV=1
Capana08g000010	IDHC_TOBAC Isocitrate dehydrogenase [NADP] OS=Nicotiana tabacum PE=2 SV=1
Capana05g002104	"SODM_CAPAN Superoxide dismutase [Mn], mitochondrial OS=Capsicum annuum GN=SODA PE=2 SV=1"
Capana01g003113	SODC_CAPAN Superoxide dismutase [Cu-Zn] OS=Capsicum annuum GN=SODCC PE=2 SV=1
Capana10g000325	"ACOX3_ARATH Acyl-coenzyme A oxidase 3, peroxisomal OS=Arabidopsis thaliana GN=ACX3 PE=1 SV=1"
cann04626 Plant-pathogen interaction（7）
Capana11g002133	ENPL_HORVU Endoplasmin homolog OS=Hordeum vulgare PE=2 SV=1	0
Capana07g001239	HSP90_THEPA Heat shock protein 90 OS=Theileria parva GN=TP02_0244 PE=2 SV=2
Capana10g000190	HSP80_SOLLC Heat shock cognate protein 80 OS=Solanum lycopersicum GN=HSC80 PE=2 SV=1
Capana07g002410	HSP80_SOLLC Heat shock cognate protein 80 OS=Solanum lycopersicum GN=HSC80 PE=2 SV=1
Capana11g000573	CALM_CAPAN Calmodulin OS=Capsicum annuum GN=CCM1 PE=2 SV=3
Capana06g001383	CDPK4_ARATH Calcium-dependent protein kinase 4 OS=Arabidopsis thaliana GN=CPK4 PE=1 SV=1
Capana04g000179	ENPL_CATRO Endoplasmin homolog OS=Catharanthus roseus GN=HSP90 PE=2 SV=1
