# Supplementary material for: Comprehensive Proteome and Lysine Acetylome Analysis Reveals the Widespread Involvement of Acetylation in Cold Resistance of Pepper (Capsicum annuum L.)
Source: Front Plant Sci. 2021 Aug 27;12:730489. doi: 10.3389/fpls.2021.730489 (PMC8429487; doi:10.3389/fpls.2021.730489)
Supplement: Supplementary Table 9 — A list of acetylation modification sites identified in the photosynthetic pathway. [file Table_9.XLSX]

## Sheet: Sheet1
Table S9. List of acetylation modification sites identified in the photosynthetic pathway
The red font indicates that there is a significant difference in the modification level of acetylation												Modification sites information																								Protein quantitation
The black black indicates that there is no significant difference in the modification level of acetylation												A188												A122												A188												A122
Protein accession	Position	Amino acid	Protein description	Gene name	Localization probability	PEP	Score	Modified sequence	Charge	Mass error [ppm]	MS/MS Count	T0_1	T0_2	T0_3	T1_1	T1_2	T1_3	T2_1	T2_2	T2_3	R1_1	R1_2	R1_3	T0_1	T0_2	T0_3	T1_1	T1_2	T1_3	T2_1	T2_2	T2_3	R1_1	R1_2	R1_3	T0_1	T0_2	T0_3	T1_1	T1_2	T1_3	T2_1	T2_2	T2_3	R1_1	R1_2	R1_3	T0_1	T0_2
Capana07g000048	38	K	PSAA_TOBAC Photosystem I P700 chlorophyll a apoprotein A1 OS=Nicotiana tabacum GN=psaA PE=3 SV=2	psaA	1	4.79344e-89	101.98	TIAK(1)GPDTTTWIWNLHADAHDFDSHTSDLEEISR	4	5.6241	13	1.327	1.209	1.171	0.855	0.924	0.771	1.288	1.413		0.929	0.806		0.993									0.765		0.548	0.802	0.868	0.863	0.937	0.973	1.006	0.867	0.854	0.858	0.821	0.83	0.804	1.082	1.106
Capana07g000048	327	K	PSAA_TOBAC Photosystem I P700 chlorophyll a apoprotein A1 OS=Nicotiana tabacum GN=psaA PE=3 SV=2	psaA	1	0.00282605	42.446	DILEAHK(1)GPFTGQGHK	3	-8.6516	2			0.778											1.222											0.802	0.868	0.863	0.937	0.973	1.006	0.867	0.854	0.858	0.821	0.83	0.804	1.082	1.106
Capana07g000048	11	K	PSAA_TOBAC Photosystem I P700 chlorophyll a apoprotein A1 OS=Nicotiana tabacum GN=psaA PE=3 SV=2	psaA	1	7.94506e-66	191.95	SPEPEVK(1)ILVDRDPVK	2	-2.7643	50	1.101	1.087	1.064	1.276	1.16	1.183	0.918	0.821	0.691	0.616	0.665	0.658	1.095	1.188	1.29	0.846	0.795	0.726		0.543	0.634	1.526	1.499	1.618	0.802	0.868	0.863	0.937	0.973	1.006	0.867	0.854	0.858	0.821	0.83	0.804	1.082	1.106
Capana07g000048	320	K	PSAA_TOBAC Photosystem I P700 chlorophyll a apoprotein A1 OS=Nicotiana tabacum GN=psaA PE=3 SV=2	psaA	1	5.63268e-217	281.56	TNWGIGHGLK(1)DILEAHK	3	-6.2607	49	0.539	0.553	0.596	0.962	0.792	0.77	0.282	0.283	0.379	0.375	0.611	0.722	0.759	1.809	1.326	1.137	1.222	1.157	0.725	0.753	0.671	2.623	2.259	2.693	0.802	0.868	0.863	0.937	0.973	1.006	0.867	0.854	0.858	0.821	0.83	0.804	1.082	1.106
Capana07g000048	550	K	PSAA_TOBAC Photosystem I P700 chlorophyll a apoprotein A1 OS=Nicotiana tabacum GN=psaA PE=3 SV=2	psaA	1	0.000272081	115.86	LK(1)VAPATQPR	2	-6.2956	9								0.743	0.914		0.514	0.533					1.146	0.93	0.981		0.734			2.505	0.802	0.868	0.863	0.937	0.973	1.006	0.867	0.854	0.858	0.821	0.83	0.804	1.082	1.106
Capana07g000048	20	K	PSAA_TOBAC Photosystem I P700 chlorophyll a apoprotein A1 OS=Nicotiana tabacum GN=psaA PE=3 SV=2	psaA	1	5.5463e-41	206.7	ILVDRDPVK(1)TSFEEWAR	3	-8.878	25	1.477	0.588	0.649	0.786	0.927	0.813	1.59	1.495	1.406	1.286	0.612	0.636	1.472	0.675	0.729	0.885	0.943	0.872	0.494	0.505	0.608	1.467	1.607	1.477	0.802	0.868	0.863	0.937	0.973	1.006	0.867	0.854	0.858	0.821	0.83	0.804	1.082	1.106
Capana06g001915	128	K	PSAD_SOLLC Photosystem I reaction center subunit II, chloroplastic OS=Solanum lycopersicum GN=psaD PE=2 SV=1	psaD	1	0.000179076	88.24	K(1)EQCLALGTR	2	-8.0402	5																0.626						1.455	0.919		0.678	0.749	0.876	0.793	0.856	0.898	1.135	1.021	1.054	1.179	1.082	1.218	0.947	0.983
Capana06g001915	124	K	PSAD_SOLLC Photosystem I reaction center subunit II, chloroplastic OS=Solanum lycopersicum GN=psaD PE=2 SV=1	psaD	1	0.0025651	69.905	QGPNLLK(1)LAR	2	-7.7028	9						0.528			0.624	1.213	0.784				0.519	0.829			1.024	0.675		2.802			0.678	0.749	0.876	0.793	0.856	0.898	1.135	1.021	1.054	1.179	1.082	1.218	0.947	0.983
Capana06g001915	163	K	PSAD_SOLLC Photosystem I reaction center subunit II, chloroplastic OS=Solanum lycopersicum GN=psaD PE=2 SV=1	psaD	1	3.98252e-11	137.89	VFPNGEVQYLHPK(1)DGVYPEK	2	1.3612	59	0.288		0.325	1.17	0.782	0.948	0.595	1.5	1.577	1.32		1.645	1.46	0.649	0.71	0.91	0.855	0.787	1.218	0.768	0.772	1.303	1.416		0.678	0.749	0.876	0.793	0.856	0.898	1.135	1.021	1.054	1.179	1.082	1.218	0.947	0.983
Capana06g001915	189	K	PSAD_SOLLC Photosystem I reaction center subunit II, chloroplastic OS=Solanum lycopersicum GN=psaD PE=2 SV=1	psaD	1	0.00350374	96.311	NK(1)SAIEVK	2	-0.70763	15			0.507			1.325	0.988	0.897	0.925		1.153	1.572	0.79	0.87	0.704	0.52						1.117	1.631		0.678	0.749	0.876	0.793	0.856	0.898	1.135	1.021	1.054	1.179	1.082	1.218	0.947	0.983
Capana06g001915	143	K	PSAD_SOLLC Photosystem I reaction center subunit II, chloroplastic OS=Solanum lycopersicum GN=psaD PE=2 SV=1	psaD	1	1.47303e-07	161.12	YK(1)INYQFYR	2	7.5002	49	0.882	0.749	0.763	0.881	0.871		0.888	1.032	1.059	1.274	0.989	1.377	1.154	0.866	0.984	0.922	0.937	0.965	1.014	0.835	0.779	1.372	1.408		0.678	0.749	0.876	0.793	0.856	0.898	1.135	1.021	1.054	1.179	1.082	1.218	0.947	0.983
Capana01g004493	155	K	PSAN_ARATH Photosystem I reaction center subunit N, chloroplastic OS=Arabidopsis thaliana GN=PSAN PE=1 SV=2	PSAN	0.997393	2.00259e-140	218.58	VPFLSDDLDLECEGK(0.003)DK(0.997)YK	3	-6.5316	45	1.341	1.371	1.101	1.42	1.414	1.335	1.038	1.069	0.969	1.073	0.967	1.079	1.115	1.194	1.133	0.563	0.616	0.566	0.774	0.776	0.691	0.714		0.679	0.762	0.701	0.741	0.739	0.747	0.762	0.951	0.896	0.918	1.231	1.205	1.211	0.865	0.88
Capana01g004493	122	K	PSAN_ARATH Photosystem I reaction center subunit N, chloroplastic OS=Arabidopsis thaliana GN=PSAN PE=1 SV=2	PSAN	1	5.90115e-10	129.01	AYTVQFGTCK(1)FPENFTGCQDLAK(1)QK	3	4.5615	27	1.61	0.408	0.51	0.691	0.587		2.431	2.167	1.956	1.888	0.767	0.922	1.24	0.359	0.383	0.679	0.716	0.655	0.927	0.826	0.79	0.862	0.835	0.793	0.762	0.701	0.741	0.739	0.747	0.762	0.951	0.896	0.918	1.231	1.205	1.211	0.865	0.88
Capana01g004493	157	K	PSAN_ARATH Photosystem I reaction center subunit N, chloroplastic OS=Arabidopsis thaliana GN=PSAN PE=1 SV=2	PSAN	1	1.31462e-33	200.76	YK(1)CGSNVFWK	2	-4.719	47	1.097	1.099	0.978	1.077	1.197	1.019	0.948	0.765	0.887	1.082	1.136	1.059	1.001	1.039	1.046	0.719	0.756	0.762	0.796	0.875	0.761	1.302	1.301	1.3	0.762	0.701	0.741	0.739	0.747	0.762	0.951	0.896	0.918	1.231	1.205	1.211	0.865	0.88
Capana01g004493	135	K	PSAN_ARATH Photosystem I reaction center subunit N, chloroplastic OS=Arabidopsis thaliana GN=PSAN PE=1 SV=2	PSAN	1	6.02534e-257	297.53	FPENFTGCQDLAK(1)QK(1)K	2	5.2016	79	1.148	1.098	1.018	1.125	1.174	1.188	0.988	1.011	1.024	1.109	1.035	1.101	1.077	1.055	0.98	0.818	0.838	0.771	0.903	0.789	0.789	0.931	0.98	1.052	0.762	0.701	0.741	0.739	0.747	0.762	0.951	0.896	0.918	1.231	1.205	1.211	0.865	0.88
Capana01g004493	153	K	PSAN_ARATH Photosystem I reaction center subunit N, chloroplastic OS=Arabidopsis thaliana GN=PSAN PE=1 SV=2	PSAN	1	1.85423e-31	153.18	VPFLSDDLDLECEGK(1)DK	2	0.4089	48	0.831	0.234	0.536	0.74	0.508		1.23	1.036		1.128	1.037	0.873	1.239	1.145	0.979	1.102	1.044	0.784	0.901	1.236	0.89	1.477	1.615	1.435	0.762	0.701	0.741	0.739	0.747	0.762	0.951	0.896	0.918	1.231	1.205	1.211	0.865	0.88
Capana04g000192	87	K	PSAEA_NICSY Photosystem I reaction center subunit IV A, chloroplastic OS=Nicotiana sylvestris GN=PSAEA PE=1 SV=1	PSAEA	1	0.0123242	87.251	K(1)ESYWYK	2	-6.2779	3												0.417										1.534	1.049		0.86	0.818	0.838	0.711	0.784	0.776	1.006	0.966	1.034	1.159	1.218	1.145	0.88	0.943
Capana04g000192	77	K	PSAEA_NICSY Photosystem I reaction center subunit IV A, chloroplastic OS=Nicotiana sylvestris GN=PSAEA PE=1 SV=1	PSAEA	1	5.31306e-07	111.39	PPPIGPK(1)R	2	-3.8575	26	0.672	0.512	0.563		0.641	0.761	1.059		1.028	1.242	1.231	1.288	0.907		0.788	0.851	0.792					1.919		1.748	0.86	0.818	0.838	0.711	0.784	0.776	1.006	0.966	1.034	1.159	1.218	1.145	0.88	0.943
Capana04g000192	93	K	PSAEA_NICSY Photosystem I reaction center subunit IV A, chloroplastic OS=Nicotiana sylvestris GN=PSAEA PE=1 SV=1	PSAEA	1	0	267.63	ESYWYK(1)GTGSVVAVDQDPK	2	6.4798	83	0.877	0.723	0.891	0.849	0.868	0.874	0.965	0.978	1.053	0.825	0.989	1.247	1.169	1.247	1.122		0.941	0.838	0.878	0.746	0.822	1.306	1.457	1.335	0.86	0.818	0.838	0.711	0.784	0.776	1.006	0.966	1.034	1.159	1.218	1.145	0.88	0.943
Capana04g000192	106	K	PSAEA_NICSY Photosystem I reaction center subunit IV A, chloroplastic OS=Nicotiana sylvestris GN=PSAEA PE=1 SV=1	PSAEA	1	6.84832e-183	233	GTGSVVAVDQDPK(1)TR	2	-1.0504	48	0.993	0.993	0.918	0.836	0.937	0.889	1.094	1.007	0.951	1.267	1.151	1.19	0.956	0.973	0.928	0.816	0.711	0.702	0.742	0.667	0.81	1.437	1.526	1.504	0.86	0.818	0.838	0.711	0.784	0.776	1.006	0.966	1.034	1.159	1.218	1.145	0.88	0.943
Capana02g000764	149	K	PSBO_SOLLC Oxygen-evolving enhancer protein 1, chloroplastic OS=Solanum lycopersicum GN=PSBO PE=2 SV=2	PSBO	1	1.39976e-73	236.7	AEGVSK(1)NSAPEFQK(1)TK	2	9.5584	47	1.143		0.807	0.814	0.774	1.116	1.152	1.199	0.669	1.173	1.387	1.471	1.165	1.06	1.485		0.564	0.697	0.247	0.835	1.103	1.281	1.029	0.827	0.731	0.796	0.802	0.672	0.737	0.775	1.004	1.014	1.034	1.142	1.141	1.127	0.954	0.957
Capana02g000764	159	K	PSBO_SOLLC Oxygen-evolving enhancer protein 1, chloroplastic OS=Solanum lycopersicum GN=PSBO PE=2 SV=2	PSBO	1	0.00900614	66.619	NSAPEFQK(1)TK(1)LMTR	2	3.1562	3	1.197				0.984									0.819											0.731	0.796	0.802	0.672	0.737	0.775	1.004	1.014	1.034	1.142	1.141	1.127	0.954	0.957
Capana02g000764	124	K	PSBO_SOLLC Oxygen-evolving enhancer protein 1, chloroplastic OS=Solanum lycopersicum GN=PSBO PE=2 SV=2	PSBO	1	2.19898e-111	188.68	GTGTANQCPTIEGGVDSFAFK(1)PGK(1)YTAQK	3	1.7789	15	0.673	0.654	0.593				1.944	1.913	1.721	1.158									0.145			0.199			0.731	0.796	0.802	0.672	0.737	0.775	1.004	1.014	1.034	1.142	1.141	1.127	0.954	0.957
Capana02g000764	127	K	PSBO_SOLLC Oxygen-evolving enhancer protein 1, chloroplastic OS=Solanum lycopersicum GN=PSBO PE=2 SV=2	PSBO	1	0	384.57	PGK(1)YTAQK	2	-1.9281	83	0.839	0.852	0.823	0.714	0.676	0.681	1.117	1.175	1.185	1.166	1.068	1.124	0.843	0.824	0.854	0.879	0.86	0.819	1.186	1.042	1.121	1.37	1.436	1.345	0.731	0.796	0.802	0.672	0.737	0.775	1.004	1.014	1.034	1.142	1.141	1.127	0.954	0.957
Capana02g000764	273	K	PSBO_SOLLC Oxygen-evolving enhancer protein 1, chloroplastic OS=Solanum lycopersicum GN=PSBO PE=2 SV=2	PSBO	1	0	289.22	ENVK(1)NTASSTGK	2	-6.0321	72	0.889	0.714	0.722	0.551	0.649	0.475	0.316	0.419	0.36	1.143	1.248	0.979	0.983	1.441	1.219	0.649	0.862	1	1.054	1.549	0.934	2.044	1.811	1.989	0.731	0.796	0.802	0.672	0.737	0.775	1.004	1.014	1.034	1.142	1.141	1.127	0.954	0.957
Capana02g000764	97	K	PSBO_SOLLC Oxygen-evolving enhancer protein 1, chloroplastic OS=Solanum lycopersicum GN=PSBO PE=2 SV=2	PSBO	1	4.59708e-43	199.51	LTFDEIQSK(1)TYMEVK	2	-0.98433	42	1.31		1.092	1.216	1.173	1.251	0.917	1.108	0.968	0.939	1.007	1.007	1.119	0.946	0.95	0.773	0.532	0.565	0.836		0.679	1.18	1.136	1.296	0.731	0.796	0.802	0.672	0.737	0.775	1.004	1.014	1.034	1.142	1.141	1.127	0.954	0.957
Capana02g000764	143	K	PSBO_SOLLC Oxygen-evolving enhancer protein 1, chloroplastic OS=Solanum lycopersicum GN=PSBO PE=2 SV=2	PSBO	1	4.88967e-11	123.99	FCLEPTSFTVK(1)AEGVSK	2	0.32312	14		0.953		0.823	0.735			1.386		1.237	0.882			0.917		0.693	0.804		0.884	0.824	0.89	1.466	1.505		0.731	0.796	0.802	0.672	0.737	0.775	1.004	1.014	1.034	1.142	1.141	1.127	0.954	0.957
Capana02g000764	269	K	PSBO_SOLLC Oxygen-evolving enhancer protein 1, chloroplastic OS=Solanum lycopersicum GN=PSBO PE=2 SV=2	PSBO	1	8.96175e-13	118.91	GDEEELEK(1)ENVK	2	-7.0743	1																						1			0.731	0.796	0.802	0.672	0.737	0.775	1.004	1.014	1.034	1.142	1.141	1.127	0.954	0.957
Capana02g000764	103	K	PSBO_SOLLC Oxygen-evolving enhancer protein 1, chloroplastic OS=Solanum lycopersicum GN=PSBO PE=2 SV=2	PSBO	0.999954	3.33869e-21	52.288	TYMEVK(1)GTGTANQCPTIEGGVDSFAFK(0.324)PGK(0.677)YTAQK	3	12.977	1								1																	0.731	0.796	0.802	0.672	0.737	0.775	1.004	1.014	1.034	1.142	1.141	1.127	0.954	0.957
Capana02g000764	132	K	PSBO_SOLLC Oxygen-evolving enhancer protein 1, chloroplastic OS=Solanum lycopersicum GN=PSBO PE=2 SV=2	PSBO	1	1.73105e-110	221.63	YTAQK(1)FCLEPTSFTVK	2	8.2845	53	0.635		0.619	0.847	0.713	0.781	1.219	1.127	0.811	1.369	0.807	1.073	1.287	0.693	0.776	1.118	1.127	1.077	1.151	1.076	1.057	1.255	1.166	1.215	0.731	0.796	0.802	0.672	0.737	0.775	1.004	1.014	1.034	1.142	1.141	1.127	0.954	0.957
Capana02g000764	157	K	PSBO_SOLLC Oxygen-evolving enhancer protein 1, chloroplastic OS=Solanum lycopersicum GN=PSBO PE=2 SV=2	PSBO	1	1.23019e-21	161.23	NSAPEFQK(1)TK(1)LMTR	2	3.1562	55	1.069	0.462	0.394	0.454		1.071	1.29	1.236	0.787	1.656	1.318	1.51	0.787	0.433	0.786	0.636	0.541	0.622	1.179	0.79	1.215	1.815	1.623	1.326	0.731	0.796	0.802	0.672	0.737	0.775	1.004	1.014	1.034	1.142	1.141	1.127	0.954	0.957
Capana02g003173	159	K	PSBO_SOLTU Oxygen-evolving enhancer protein 1, chloroplastic OS=Solanum tuberosum GN=PSBO PE=2 SV=1	PSBO	1	1.23586e-53	172.92	NSAPEFQK(1)TK(1)LMTR	2	3.1562	69	0.886	0.873	0.831	0.801	0.493	0.881	1.08	1.048	1.07	1.367	1.174	1.249	0.986	0.388	0.711	0.862	0.754	0.829	0.977	0.994	1.013	1.55	1.71	1.475	0.698	0.751	0.806	0.809	0.773	0.789	1.028	1.009	1.039	1.204	1.173	1.161	0.912	0.919
Capana02g003173	271	K	PSBO_SOLTU Oxygen-evolving enhancer protein 1, chloroplastic OS=Solanum tuberosum GN=PSBO PE=2 SV=1	PSBO	1	1.19396e-12	138.23	GDEEELEK(1)ENLK(1)NTASSR	2	10.22	6					1.099				0.802	0.385		1.671						1.024	1.019						0.698	0.751	0.806	0.809	0.773	0.789	1.028	1.009	1.039	1.204	1.173	1.161	0.912	0.919
Capana02g003173	161	K	PSBO_SOLTU Oxygen-evolving enhancer protein 1, chloroplastic OS=Solanum tuberosum GN=PSBO PE=2 SV=1	PSBO	1	0.00900614	66.619	NSAPEFQK(1)TK(1)LMTR	2	3.1562	3	1.197				0.984									0.819											0.698	0.751	0.806	0.809	0.773	0.789	1.028	1.009	1.039	1.204	1.173	1.161	0.912	0.919
Capana02g003173	129	K	PSBO_SOLTU Oxygen-evolving enhancer protein 1, chloroplastic OS=Solanum tuberosum GN=PSBO PE=2 SV=1	PSBO	1	0	396.26	PGK(1)YNAK	2	2.8985	163	0.913	0.866	0.88	0.807	0.836	0.823	1.089	1.16	1.139	1.132	1.071	1.097	0.88	0.775	0.873	0.919	0.903	0.858	1.134	1.108	1.068	1.233	1.223	1.213	0.698	0.751	0.806	0.809	0.773	0.789	1.028	1.009	1.039	1.204	1.173	1.161	0.912	0.919
Capana02g003173	99	K	PSBO_SOLTU Oxygen-evolving enhancer protein 1, chloroplastic OS=Solanum tuberosum GN=PSBO PE=2 SV=1	PSBO	1	2.84515e-125	240.94	RLTYDEIQSK(1)TYMEVK	2	0.66826	83		0.991	1.11	0.896	0.93	1.376	0.948	0.844	0.873	1.235	1.031	1.145	1.213	1.244	1.328	0.887	0.584	0.444	0.665	0.719	0.535	1.462	1.38	1.158	0.698	0.751	0.806	0.809	0.773	0.789	1.028	1.009	1.039	1.204	1.173	1.161	0.912	0.919
Capana02g003173	145	K	PSBO_SOLTU Oxygen-evolving enhancer protein 1, chloroplastic OS=Solanum tuberosum GN=PSBO PE=2 SV=1	PSBO	1	8.94239e-05	114.5	LCLEPTSFTVK(1)AEGVNK(1)NSAPEFQK	3	8.8453	24						0.599	2.998		0.533					0.717	0.583	1.397					0.471	0.702			0.698	0.751	0.806	0.809	0.773	0.789	1.028	1.009	1.039	1.204	1.173	1.161	0.912	0.919
Capana02g003173	151	K	PSBO_SOLTU Oxygen-evolving enhancer protein 1, chloroplastic OS=Solanum tuberosum GN=PSBO PE=2 SV=1	PSBO	1	2.78372e-74	221.56	LCLEPTSFTVK(1)AEGVNK(1)NSAPEFQK	3	8.8453	85	0.972	1.06	0.998	0.927	1.061	1.051	0.934	0.951	0.902	1.148	1.161	1.201	0.989	0.97	0.939	0.793	0.72	0.698	0.819	0.894	0.943	1.267	1.301	1.299	0.698	0.751	0.806	0.809	0.773	0.789	1.028	1.009	1.039	1.204	1.173	1.161	0.912	0.919
Capana02g003173	275	K	PSBO_SOLTU Oxygen-evolving enhancer protein 1, chloroplastic OS=Solanum tuberosum GN=PSBO PE=2 SV=1	PSBO	1	0	293.6	GDEEELEK(1)ENLK(1)NTASSR	2	10.22	132	0.951	0.776	0.814	0.945	0.975	1.204	1.11	1.046	0.864	1.105	0.737	1.017	0.969	0.942	0.85	0.789	0.54	0.553	0.721	0.689	1.067	1.726	1.752	1.858	0.698	0.751	0.806	0.809	0.773	0.789	1.028	1.009	1.039	1.204	1.173	1.161	0.912	0.919
Capana02g003173	133	K	PSBO_SOLTU Oxygen-evolving enhancer protein 1, chloroplastic OS=Solanum tuberosum GN=PSBO PE=2 SV=1	PSBO	0.999037	7.87876e-141	207.23	GTGTANQCPTVDGGVDSFAFK(0.006)PGK(0.995)YNAK(0.999)K	3	-0.39879	29	1.364		1.442	1.536	1.577	1.501	1.033	1.083	1.156	1.21	0.818		1.095	1.04	1.109	0.635	0.68		0.544	0.689	0.629		0.438	0.421	0.698	0.751	0.806	0.809	0.773	0.789	1.028	1.009	1.039	1.204	1.173	1.161	0.912	0.919
Capana02g003173	105	K	PSBO_SOLTU Oxygen-evolving enhancer protein 1, chloroplastic OS=Solanum tuberosum GN=PSBO PE=2 SV=1	PSBO	1	2.53372e-88	158.35	TYMEVK(1)GTGTANQCPTVDGGVDSFAFKPGK	3	0.95178	25	2.086	0.668	1.856	0.453	0.574	1.66	0.788	0.877	2.785	0.384	0.413	1.808	0.561	1.435	0.481				0.372	0.374		0.423			0.698	0.751	0.806	0.809	0.773	0.789	1.028	1.009	1.039	1.204	1.173	1.161	0.912	0.919
Capana02g003173	126	K	PSBO_SOLTU Oxygen-evolving enhancer protein 1, chloroplastic OS=Solanum tuberosum GN=PSBO PE=2 SV=1	PSBO	1	3.19624e-87	209.03	GTGTANQCPTVDGGVDSFAFK(1)PGK(1)YNAK	3	-2.4534	65	1.018	0.144	0.139	0.117	0.694	0.124	2.159	2.088	0.17	0.203	1.593	1.583	1.234	0.169	0.196	0.155	1.259	1.191	2.176	2.021	1.995	0.361	1.616	1.596	0.698	0.751	0.806	0.809	0.773	0.789	1.028	1.009	1.039	1.204	1.173	1.161	0.912	0.919
Capana10g001865	112	K	PSBP_SOLLC Oxygen-evolving enhancer protein 2, chloroplastic OS=Solanum lycopersicum GN=PSBP PE=2 SV=1	PSBP	1	0	326.21	WNPSK(1)EVEYPGQVLR	2	3.175	36	0.392	0.396	0.4	0.467	0.434	0.573	0.616	0.877	0.927	1.074	0.908	0.985	0.978	0.714	0.699	0.867	1.005	0.982	1.003	0.937	1.017	2.546	2.635	2.567	0.461	0.672	0.493	0.61	0.833	0.752	0.783	0.579	0.641	1.407	1.692	1.523	0.612	0.692
Capana10g001865	217	K	PSBP_SOLLC Oxygen-evolving enhancer protein 2, chloroplastic OS=Solanum lycopersicum GN=PSBP PE=2 SV=1	PSBP	1	0	501.38	TADGDEGGK(1)HQLITATVNDGK	2	4.3235	56	0.867	0.944	1.022	0.98	0.992	0.815	0.729	0.724	0.766	1.129	1.308	1.169	1.129	1.332	1.215	0.936	0.335	0.953	1.073	1.126	1.254	1.624	0.093	1.486	0.461	0.672	0.493	0.61	0.833	0.752	0.783	0.579	0.641	1.407	1.692	1.523	0.612	0.692
Capana10g001865	234	K	PSBP_SOLLC Oxygen-evolving enhancer protein 2, chloroplastic OS=Solanum lycopersicum GN=PSBP PE=2 SV=1	PSBP	1	6.86729e-15	171.34	LYICK(1)AQAGDK(1)R	2	-7.4521	90	1.475	0.374	1.346	0.43	0.409	1.687	1.356	0.3	1.432	0.4	1.657	1.631	0.375	1.525	1.469	1.202	1.251	1.138	0.366	0.42	1.105	0.604	1.474	0.574	0.461	0.672	0.493	0.61	0.833	0.752	0.783	0.579	0.641	1.407	1.692	1.523	0.612	0.692
Capana10g001865	229	K	PSBP_SOLLC Oxygen-evolving enhancer protein 2, chloroplastic OS=Solanum lycopersicum GN=PSBP PE=2 SV=1	PSBP	1	9.92995e-218	238.01	HQLITATVNDGK(1)LYICK	2	13.684	2				1																					0.461	0.672	0.493	0.61	0.833	0.752	0.783	0.579	0.641	1.407	1.692	1.523	0.612	0.692
Capana10g001865	107	K	PSBP_SOLLC Oxygen-evolving enhancer protein 2, chloroplastic OS=Solanum lycopersicum GN=PSBP PE=2 SV=1	PSBP	1	0.0158831	85.716	LQIPSK(1)WNPSK	2	-1.1837	4																			0.977		0.564	1.222		1.238	0.461	0.672	0.493	0.61	0.833	0.752	0.783	0.579	0.641	1.407	1.692	1.523	0.612	0.692
Capana00g001213	240	K	PSBP_SOLLC Oxygen-evolving enhancer protein 2, chloroplastic OS=Solanum lycopersicum GN=PSBP PE=2 SV=1	PSBP	1	1.53659e-07	117.99	LYICK(1)AQAGDK(1)R	2	-7.4521	17	1.073		0.942			1.28	1.027		1.09		1.168	1.176		1.042	0.989	0.881	0.934	0.818			0.713		0.865		0.664	0.693	0.877	0.784	0.858	0.879	1.115	0.977	0.971	1.139	1.13	1.097	0.981	0.977
Capana00g001213	217	K	PSBP_SOLLC Oxygen-evolving enhancer protein 2, chloroplastic OS=Solanum lycopersicum GN=PSBP PE=2 SV=1	PSBP	1	0	428.11	TADGDEGGK(1)HQLITATVNNGK(1)LYICK	3	2.4532	109	1.099	1.176	0.848	1.037	0.733	1.379	1.019	1.277	1.162	1.101	0.033	1.105	1.231	0.856	0.843	0.885	0.905	0.73	0.822	0.919	0.457	1.816	1.305	1.261	0.664	0.693	0.877	0.784	0.858	0.879	1.115	0.977	0.971	1.139	1.13	1.097	0.981	0.977
Capana00g001213	234	K	PSBP_SOLLC Oxygen-evolving enhancer protein 2, chloroplastic OS=Solanum lycopersicum GN=PSBP PE=2 SV=1	PSBP	1	6.86729e-15	171.34	LYICK(1)AQAGDK(1)R	2	-7.4521	90	1.475	0.374	1.346	0.43	0.409	1.687	1.356	0.3	1.432	0.4	1.657	1.631	0.375	1.525	1.469	1.202	1.251	1.138	0.366	0.42	1.105	0.604	1.474	0.574	0.664	0.693	0.877	0.784	0.858	0.879	1.115	0.977	0.971	1.139	1.13	1.097	0.981	0.977
Capana00g001213	107	K	PSBP_SOLLC Oxygen-evolving enhancer protein 2, chloroplastic OS=Solanum lycopersicum GN=PSBP PE=2 SV=1	PSBP	1	1.65398e-07	126.29	LQVPSK(1)WNPSK	2	0.62671	30	0.696	0.449	0.517	0.761	0.733	0.837	0.954	1.341	1.24		0.749	1.426	1.438		0.853	1.223	1.096	1.077	1.229	0.735	0.777	1.338	1.266	1.267	0.664	0.693	0.877	0.784	0.858	0.879	1.115	0.977	0.971	1.139	1.13	1.097	0.981	0.977
Capana00g001213	112	K	PSBP_SOLLC Oxygen-evolving enhancer protein 2, chloroplastic OS=Solanum lycopersicum GN=PSBP PE=2 SV=1	PSBP	1	0	326.21	WNPSK(1)EVEYPGQVLR	2	3.175	36	0.392	0.396	0.4	0.467	0.434	0.573	0.616	0.877	0.927	1.074	0.908	0.985	0.978	0.714	0.699	0.867	1.005	0.982	1.003	0.937	1.017	2.546	2.635	2.567	0.664	0.693	0.877	0.784	0.858	0.879	1.115	0.977	0.971	1.139	1.13	1.097	0.981	0.977
Capana00g001213	87	K	PSBP_SOLLC Oxygen-evolving enhancer protein 2, chloroplastic OS=Solanum lycopersicum GN=PSBP PE=2 SV=1	PSBP	1	0.00950836	59.67	PK(1)ENTDFMPYNGDGFK	2	-2.2765	2																						1			0.664	0.693	0.877	0.784	0.858	0.879	1.115	0.977	0.971	1.139	1.13	1.097	0.981	0.977
Capana00g001213	229	K	PSBP_SOLLC Oxygen-evolving enhancer protein 2, chloroplastic OS=Solanum lycopersicum GN=PSBP PE=2 SV=1	PSBP	1	2.66621e-194	226.06	TADGDEGGK(1)HQLITATVNNGK(1)LYICK	3	2.4532	56		0.151	1.929	2.612	2.676	2.771	0.364	2.819	1.108	0.507		0.976	0.744	0.233	0.281	0.469	0.39	0.561	0.671	0.216		0.506	0.538	0.478	0.664	0.693	0.877	0.784	0.858	0.879	1.115	0.977	0.971	1.139	1.13	1.097	0.981	0.977
Capana00g001213	164	K	PSBP_SOLLC Oxygen-evolving enhancer protein 2, chloroplastic OS=Solanum lycopersicum GN=PSBP PE=2 SV=1	PSBP	1	5.18387e-06	92.445	VDYLLGK(1)QAYFGK	2	-4.6516	20	0.476			0.656	0.666	0.528	0.747		0.692		0.775	1.026	1.153	0.825	0.559	0.976	1.221	1.073	1.031	1.032	0.827	2.004	1.869	1.862	0.664	0.693	0.877	0.784	0.858	0.879	1.115	0.977	0.971	1.139	1.13	1.097	0.981	0.977
Capana07g002488	71	K	PSBR_SOLTU Photosystem II 10 kDa polypeptide, chloroplastic OS=Solanum tuberosum GN=PSBR PE=2 SV=1	PSBR	1	0.00138365	87.895	GK(1)GVYQFVDK	2	-8.6716	7							0.859				0.562			0.759		1.048	0.835		0.854				2.084		0.488	0.806	0.571	0.356	0.506	0.603	0.717	0.697	0.659	0.878	0.931	0.763	1.02	0.67
Capana07g002488	44	K	PSBR_SOLTU Photosystem II 10 kDa polypeptide, chloroplastic OS=Solanum tuberosum GN=PSBR PE=2 SV=1	PSBR	1	7.80449e-126	236.37	IK(1)TDKPYGINGGMDLR	2	-2.5476	112	0.773	0.693	0.656	1.004	0.99	1.022	0.664	0.788	0.682	1.206	0.953	1.152	1.484	1.343	1.315	1.024	0.922	0.845	0.825	0.848	0.867	1.38	1.272	1.289	0.488	0.806	0.571	0.356	0.506	0.603	0.717	0.697	0.659	0.878	0.931	0.763	1.02	0.67
Capana07g002488	47	K	PSBR_SOLTU Photosystem II 10 kDa polypeptide, chloroplastic OS=Solanum tuberosum GN=PSBR PE=2 SV=1	PSBR	1	6.77569e-05	121.71	TDK(1)PYGINGGMDLR	2	-6.6876	16	0.928		0.541		0.615	0.843	0.851	1.257	0.951			0.687	0.749		1.008		1.272	0.903	0.494			2.127	1.774		0.488	0.806	0.571	0.356	0.506	0.603	0.717	0.697	0.659	0.878	0.931	0.763	1.02	0.67
Capana02g002133	191	K	PSBQ2_ARATH Oxygen-evolving enhancer protein 3-2, chloroplastic OS=Arabidopsis thaliana GN=PSBQ2 PE=1 SV=2	PSBQ2	1	0.000185162	123.5	LQDLTGK(1)LFK	2	-9.7992	23	0.445	0.491	0.473	0.705	0.639	0.713	0.516	0.938	0.626	1.669	1.112	1.137	0.911	0.649	0.78	0.829	0.748		1.007	0.964	0.948	2.101	2.3	2.299	0.589	0.673	0.752	0.795	0.795	0.774	1.008	1.092	0.957	1.221	1.224	1.615	0.792	0.829
Capana02g002133	116	K	PSBQ2_ARATH Oxygen-evolving enhancer protein 3-2, chloroplastic OS=Arabidopsis thaliana GN=PSBQ2 PE=1 SV=2	PSBQ2	1	0.00436559	75.243	DFSLPLK(1)NR	2	0.92326	30	0.598	0.551			0.578	0.752	0.66	0.746	1.02				1.281		0.553	0.871	0.79	0.864				2.205	1.868	1.663	0.589	0.673	0.752	0.795	0.795	0.774	1.008	1.092	0.957	1.221	1.224	1.615	0.792	0.829
Capana02g002133	204	K	PSBQ2_ARATH Oxygen-evolving enhancer protein 3-2, chloroplastic OS=Arabidopsis thaliana GN=PSBQ2 PE=1 SV=2	PSBQ2	1	3.92721e-34	219.89	TISDLDHAAK(1)TK	2	-3.2939	24	0.451	0.433	0.424	0.392	0.428	0.401	1.122	1.084	1.093	1.412	1.449	1.417	0.439	0.445	0.474	0.562	0.53	0.58	1.391	1.504	1.424	2.224	2.238	2.086	0.589	0.673	0.752	0.795	0.795	0.774	1.008	1.092	0.957	1.221	1.224	1.615	0.792	0.829
Capana02g002133	194	K	PSBQ2_ARATH Oxygen-evolving enhancer protein 3-2, chloroplastic OS=Arabidopsis thaliana GN=PSBQ2 PE=1 SV=2	PSBQ2	1	6.45745e-29	151.66	LFK(1)TISDLDHAAK	2	-0.76225	48	0.802	0.796	0.759	0.965	0.896	0.928	1.05	1.045	0.949	1.372	1.329	1.206	0.623	0.662	0.765	0.638	0.612	0.482	0.873	0.858	0.904	1.867	1.754	1.864	0.589	0.673	0.752	0.795	0.795	0.774	1.008	1.092	0.957	1.221	1.224	1.615	0.792	0.829
Capana02g002133	144	K	PSBQ2_ARATH Oxygen-evolving enhancer protein 3-2, chloroplastic OS=Arabidopsis thaliana GN=PSBQ2 PE=1 SV=2	PSBQ2	1	0.000653442	108.4	EIVGVK(1)DFIDK	2	-13.175	10	0.536		0.521							1.054	1.031					0.48			0.858				1.786	1.733	0.589	0.673	0.752	0.795	0.795	0.774	1.008	1.092	0.957	1.221	1.224	1.615	0.792	0.829
Capana02g002133	177	K	PSBQ2_ARATH Oxygen-evolving enhancer protein 3-2, chloroplastic OS=Arabidopsis thaliana GN=PSBQ2 PE=1 SV=2	PSBQ2	1	0.0173224	81.642	TVISAK(1)PK	1	-3.864	1																							1		0.589	0.673	0.752	0.795	0.795	0.774	1.008	1.092	0.957	1.221	1.224	1.615	0.792	0.829
Capana02g002133	138	K	PSBQ2_ARATH Oxygen-evolving enhancer protein 3-2, chloroplastic OS=Arabidopsis thaliana GN=PSBQ2 PE=1 SV=2	PSBQ2	0.999952	0.000270361	121.71	VKDSAK(1)EIVGVK	2	-7.8041	8			0.63								1.29				0.639			0.45	0.935		1.003	1.519	1.534		0.589	0.673	0.752	0.795	0.795	0.774	1.008	1.092	0.957	1.221	1.224	1.615	0.792	0.829
Capana02g002133	171	K	PSBQ2_ARATH Oxygen-evolving enhancer protein 3-2, chloroplastic OS=Arabidopsis thaliana GN=PSBQ2 PE=1 SV=2	PSBQ2	1	7.64235e-10	96.946	YDLK(1)TVISAK	2	-7.5364	27	0.408			0.485		0.464	0.699	1.005	1.009	0.947	0.78	1.104				0.611			0.967		0.852	1.874	1.952	1.843	0.589	0.673	0.752	0.795	0.795	0.774	1.008	1.092	0.957	1.221	1.224	1.615	0.792	0.829
Capana00g001154	308	K	PSBB_TOBAC Photosystem II CP47 chlorophyll apoprotein OS=Nicotiana tabacum GN=psbB PE=3 SV=1	psbB	1	1.61247e-22	135.24	IPEK(1)LAFYDYIGNNPAK	2	-1.1318	14	1.556	0.889		0.444	0.441		1.711	0.636	0.941	1.266	0.91	0.873	1.761			1.229			0.914	0.428					0.9	0.901	0.891	0.956	0.913	0.904	0.841	0.884	0.879	0.895	0.864	0.894	1.135	1.124
Capana00g001154	130	K	PSBB_TOBAC Photosystem II CP47 chlorophyll apoprotein OS=Nicotiana tabacum GN=psbB PE=3 SV=1	psbB	1	0.00767327	51.872	TGK(1)PSLDLPK	2	-7.3601	4	0.877					1.386													0.6			1.137			0.9	0.901	0.891	0.956	0.913	0.904	0.841	0.884	0.879	0.895	0.864	0.894	1.135	1.124
Capana00g001154	438	K	PSBB_TOBAC Photosystem II CP47 chlorophyll apoprotein OS=Nicotiana tabacum GN=psbB PE=3 SV=1	psbB	1	0.000240036	122.44	ATLK(1)SDGVFR	2	-7.9378	21	0.686	0.685	0.73	0.825	0.993	0.817	0.768	0.946				0.987	0.961	1.004	0.727	1.112	1.16	1.092	1.214		0.568	1.581	1.582	1.565	0.9	0.901	0.891	0.956	0.913	0.904	0.841	0.884	0.879	0.895	0.864	0.894	1.135	1.124
Capana00g001154	504	K	PSBB_TOBAC Photosystem II CP47 chlorophyll apoprotein OS=Nicotiana tabacum GN=psbB PE=3 SV=1	psbB	1	0.00187046	90.308	LGDPTTK(1)R	2	-2.6973	10									0.759	0.721			1.183	1.018	1.134		0.578	0.693	0.778				1.616	1.52	0.9	0.901	0.891	0.956	0.913	0.904	0.841	0.884	0.879	0.895	0.864	0.894	1.135	1.124
Capana03g000905	185	K	PPL1_ARATH PsbP-like protein 1, chloroplastic OS=Arabidopsis thaliana GN=PPL1 PE=1 SV=1	PPL1	1	2.59354e-11	108.34	HALTVVCVGNGK(1)FYTLTTGANER	3	-0.46311	3								1.016		1.188			0.796												0.714	0.784	0.812	0.775	0.76	0.8	1.019	1.091	1.021	1.183	1.193	1.21	0.868	0.876
Capana03g000905	135	K	PPL1_ARATH PsbP-like protein 1, chloroplastic OS=Arabidopsis thaliana GN=PPL1 PE=1 SV=1	PPL1	1	0.00362019	146.03	K(1)FLASPSQK	2	-6.2747	13						0.572		0.979	0.932				0.86	0.536	0.535	0.392	0.563	0.643			0.601	1.773	2.608	2.007	0.714	0.784	0.812	0.775	0.76	0.8	1.019	1.091	1.021	1.183	1.193	1.21	0.868	0.876
Capana03g002267	189	K	UCRIA_SOLTU Cytochrome b6-f complex iron-sulfur subunit, chloroplastic OS=Solanum tuberosum GN=petC PE=2 SV=1	petC	1	2.2836e-53	203.93	FICPCHGSQYNNQGK(1)VVR	3	-0.77993	52	1.052	1.05	1.001	0.867	0.92	0.93	1.125	1.107	1.071	1.19	1.146	1.199	0.85	0.823	0.847	0.738	0.69	0.678	0.961	0.967	1.01	1.143	1.325	1.312	0.848	0.827	0.806	0.851	0.788	0.819	0.952	1.012	0.971	1.11	1.059	1.106	0.909	0.866
Capana03g002267	122	K	UCRIA_SOLTU Cytochrome b6-f complex iron-sulfur subunit, chloroplastic OS=Solanum tuberosum GN=petC PE=2 SV=1	petC	1	2.79289e-37	219.59	DALGNDVVASEWLK(1)THAPGSR	3	-7.425	24	0.442	0.48	0.48	0.663	0.714	0.759	0.723	1.442	1.253	1.875	0.762	0.947	1.64	0.839	0.79	0.865	0.836	0.952	0.831	0.785	0.788	1.671	1.711	1.75	0.848	0.827	0.806	0.851	0.788	0.819	0.952	1.012	0.971	1.11	1.059	1.106	0.909	0.866
Capana02g000862	127	K	CYF_ATRBE Apocytochrome f OS=Atropa belladonna GN=petA PE=3 SV=1	petA	1	0.00875686	60.589	ISPEMK(1)ER	2	-3.0948	9				0.512		1.118	1.037					1.017		0.867						0.461		1.227	1.302	1.46	0.727	0.823	0.822	0.877	0.902	0.928	1.072	1.052	1.078	1.019	0.965	0.98	0.984	0.999
Capana02g000862	142	K	CYF_ATRBE Apocytochrome f OS=Atropa belladonna GN=petA PE=3 SV=1	petA	1	2.46442e-61	162.21	IGNLSFQSYRPNK(1)K	2	-2.9395	25		0.881	0.783		0.834	0.675	0.71		0.641	0.813	1.085	0.845	0.829	1.044	0.979			0.584	0.767	1.203	1.135	1.669	1.763	1.759	0.727	0.823	0.822	0.877	0.902	0.928	1.072	1.052	1.078	1.019	0.965	0.98	0.984	0.999
Capana02g000862	178	K	CYF_ATRBE Apocytochrome f OS=Atropa belladonna GN=petA PE=3 SV=1	petA	1	1.01803e-72	204.34	DVHFLK(1)YPIYVGGNR	2	8.8779	57	0.69	0.937	0.878	1.187	0.972	0.861	0.574	0.724	0.7	0.751	0.799	0.571	0.907	0.999	1.046	1.363	1.317	1.301	1.147	0.981	0.879	1.469	1.495	1.449	0.727	0.823	0.822	0.877	0.902	0.928	1.072	1.052	1.078	1.019	0.965	0.98	0.984	0.999
Capana02g000862	91	K	CYF_ATRBE Apocytochrome f OS=Atropa belladonna GN=petA PE=3 SV=1	petA	1	3.55337e-05	108.5	IPYDMQLK(1)QVLANGK	2	0.8335	11	1.034									0.87							1.052		0.809	0.943		1.216	0.991	1.086	0.727	0.823	0.822	0.877	0.902	0.928	1.072	1.052	1.078	1.019	0.965	0.98	0.984	0.999
Capana02g000862	220	K	CYF_ATRBE Apocytochrome f OS=Atropa belladonna GN=petA PE=3 SV=1	petA	1	0.00476801	69.201	EK(1)GGYEITITDASEGR	2	-3.8992	2													1.27									0.73			0.727	0.823	0.822	0.877	0.902	0.928	1.072	1.052	1.078	1.019	0.965	0.98	0.984	0.999
Capana02g002577	83	K	FENR1_TOBAC Ferredoxin--NADP reductase, leaf-type isozyme, chloroplastic OS=Nicotiana tabacum GN=PETH PE=2 SV=1	PETH	1	0.000287007	174.8	PK(1)EPYIGR	2	-4.6302	28		1.194	1.064	1.296	1.202	1.14	0.806	0.826	0.81	0.911	0.98	0.949	1.096	1.203	1.166		0.871	0.836	0.799	0.847	0.796	1.089	1.078	1.041	0.794	0.819	0.825	0.827	0.867	0.856	1.02	1.035	1.028	1.021	1.022	1.048	0.945	0.929
Capana02g002577	194	K	FENR1_TOBAC Ferredoxin--NADP reductase, leaf-type isozyme, chloroplastic OS=Nicotiana tabacum GN=PETH PE=2 SV=1	PETH	0.998306	3.3768e-06	71.471	GVCSNFLCDLK(0.002)PGADVK(0.998)ITGPVGK	3	-5.6602	6							1.297		1.302		0.73		1.185									0.837		0.649	0.794	0.819	0.825	0.827	0.867	0.856	1.02	1.035	1.028	1.021	1.022	1.048	0.945	0.929
Capana02g002577	70	K	FENR1_TOBAC Ferredoxin--NADP reductase, leaf-type isozyme, chloroplastic OS=Nicotiana tabacum GN=PETH PE=2 SV=1	PETH	1	3.27797e-16	141.44	K(1)QDEGVVVNK(1)FRPK	2	9.1526	32	1.114	1.351	1.363	1.241	1.433	1.388	1.091	0.861	1.027	0.789	1.127	0.934	0.89	1.035	1.055	0.919		0.959	0.75	0.884			0.315	0.476	0.794	0.819	0.825	0.827	0.867	0.856	1.02	1.035	1.028	1.021	1.022	1.048	0.945	0.929
Capana02g002577	139	K	FENR1_TOBAC Ferredoxin--NADP reductase, leaf-type isozyme, chloroplastic OS=Nicotiana tabacum GN=PETH PE=2 SV=1	PETH	0.999871	4.13745e-34	191.98	EGQSIGVIADGVDANGKPHK(1)LR	3	-3.883	50	0.646	0.516	0.485	0.318	0.389	0.37	0.543	0.628	0.839	1.454	1.324	1.497	0.565	1.055	0.707	0.484	0.637	0.656	1.481	1.106	0.87	2.383	2.533	2.514	0.794	0.819	0.825	0.827	0.867	0.856	1.02	1.035	1.028	1.021	1.022	1.048	0.945	0.929
Capana02g002577	188	K	FENR1_TOBAC Ferredoxin--NADP reductase, leaf-type isozyme, chloroplastic OS=Nicotiana tabacum GN=PETH PE=2 SV=1	PETH	1	4.92607e-41	195.36	GVCSNFLCDLK(1)PGADVK	2	2.823	28			0.457	0.532	0.487	0.471	0.979	1.048	0.968	1.31	0.652	0.589	1.017	0.374	0.567	1.061	0.982	0.849	0.79	0.842	0.68	2.719	2.348	2.275	0.794	0.819	0.825	0.827	0.867	0.856	1.02	1.035	1.028	1.021	1.022	1.048	0.945	0.929
Capana02g002577	236	K	FENR1_TOBAC Ferredoxin--NADP reductase, leaf-type isozyme, chloroplastic OS=Nicotiana tabacum GN=PETH PE=2 SV=1	PETH	1	0.000184407	120.65	MFFEK(1)HDDYK	2	-5.8295	53	0.916	0.9	0.886	1.064	1.126	1.091	0.987	0.973	0.951	0.962	0.932	1.02	0.985	0.993	1.052	1.002	0.97	0.888	0.83	0.859	0.809	1.253	1.276	1.275	0.794	0.819	0.825	0.827	0.867	0.856	1.02	1.035	1.028	1.021	1.022	1.048	0.945	0.929
Capana02g002577	79	K	FENR1_TOBAC Ferredoxin--NADP reductase, leaf-type isozyme, chloroplastic OS=Nicotiana tabacum GN=PETH PE=2 SV=1	PETH	1	1.35568e-246	304.18	QDEGVVVNK(1)FRPK	2	1.4083	363	1.024	1.045	0.956	0.894	0.777	0.852	0.986	0.939	0.97	1.041	1.044	1.02	0.963	0.997	0.984	1.149	1.178	1.101	1.036	1.013	0.993	1.059	0.99	0.99	0.794	0.819	0.825	0.827	0.867	0.856	1.02	1.035	1.028	1.021	1.022	1.048	0.945	0.929
Capana02g002577	348	K	FENR1_TOBAC Ferredoxin--NADP reductase, leaf-type isozyme, chloroplastic OS=Nicotiana tabacum GN=PETH PE=2 SV=1	PETH	1	0.000152524	154.35	EGIDWADYK(1)K	2	-8.2644	17	0.539			0.891		1.046	0.77	1.006	1.19	1.168		1.289	1.386			1.064		0.905	0.984	0.793	0.729	1.166	0.995	1.079	0.794	0.819	0.825	0.827	0.867	0.856	1.02	1.035	1.028	1.021	1.022	1.048	0.945	0.929
Capana02g002577	172	K	FENR1_TOBAC Ferredoxin--NADP reductase, leaf-type isozyme, chloroplastic OS=Nicotiana tabacum GN=PETH PE=2 SV=1	PETH	1	1.24387e-07	129.28	LVYTNDK(1)GEEVK	2	-5.9894	19	0.947	0.837		1.047	1.019	1.018	1.014	1.02	0.986		0.383		1.206	1.187		1.006	0.938	0.058	0.955	1.103		1.222	1.427	1.625	0.794	0.819	0.825	0.827	0.867	0.856	1.02	1.035	1.028	1.021	1.022	1.048	0.945	0.929
Capana02g002577	201	K	FENR1_TOBAC Ferredoxin--NADP reductase, leaf-type isozyme, chloroplastic OS=Nicotiana tabacum GN=PETH PE=2 SV=1	PETH	1	0.00678485	71.896	ITGPVGK(1)EMLMPK	2	-7.8541	14			0.654	0.737			1.009	0.917	1.023	0.913	1.11		0.83	0.808		0.972	1.057				1.028	1.438	1.504		0.794	0.819	0.825	0.827	0.867	0.856	1.02	1.035	1.028	1.021	1.022	1.048	0.945	0.929
Capana02g002577	312	K	FENR1_TOBAC Ferredoxin--NADP reductase, leaf-type isozyme, chloroplastic OS=Nicotiana tabacum GN=PETH PE=2 SV=1	PETH	1	4.12572e-07	79.889	K(1)DNTFVYMCGLK	2	-2.1236	5		0.674																		0.776	0.712	1.32	1.518		0.794	0.819	0.825	0.827	0.867	0.856	1.02	1.035	1.028	1.021	1.022	1.048	0.945	0.929
Capana02g002577	136	K	FENR1_TOBAC Ferredoxin--NADP reductase, leaf-type isozyme, chloroplastic OS=Nicotiana tabacum GN=PETH PE=2 SV=1	PETH	0.996012	1.64876e-05	112.68	EGQSIGVIADGVDANGK(0.996)PHK(0.004)LR	3	0.38923	24	0.819	0.83	0.849	0.814	0.719	0.806	1.151	1.112	1.166	1.028	1.035	1.108	1.039	0.961	0.945	0.854	0.812	0.821	1.068	1.11	1.061	1.307	1.286	1.299	0.794	0.819	0.825	0.827	0.867	0.856	1.02	1.035	1.028	1.021	1.022	1.048	0.945	0.929
Capana02g002577	292	K	FENR1_TOBAC Ferredoxin--NADP reductase, leaf-type isozyme, chloroplastic OS=Nicotiana tabacum GN=PETH PE=2 SV=1	PETH	1	0.014894	65.404	GEK(1)MYIQTR	2	16.973	6							0.844	1.823	1.337	1.227			0.485										0.284		0.794	0.819	0.825	0.827	0.867	0.856	1.02	1.035	1.028	1.021	1.022	1.048	0.945	0.929
Capana02g002577	164	K	FENR1_TOBAC Ferredoxin--NADP reductase, leaf-type isozyme, chloroplastic OS=Nicotiana tabacum GN=PETH PE=2 SV=1	PETH	1	0.00460136	82.716	TVSLCVK(1)R	2	-5.2474	14		0.789	0.55	0.904	0.542		0.788	1.057	0.367	1.33		1.124	0.883						0.827		0.393	2.583	1.863		0.794	0.819	0.825	0.827	0.867	0.856	1.02	1.035	1.028	1.021	1.022	1.048	0.945	0.929
Capana02g002193	152	K	ATPG_TOBAC ATP synthase gamma chain, chloroplastic OS=Nicotiana tabacum GN=ATPC PE=1 SV=1	ATPC	1	2.46362e-06	123.5	GLCGGFNNYILK(1)K	2	2.138	41	0.594	1.523		0.763	0.743	0.762	0.712	1.194	1.309	1.177	0.763	0.95	1.274	0.887	0.878	1.179	1.283	1.174	1.114	1.083	1.096	0.783	0.759		0.798	0.842	0.883	0.846	0.833	0.849	1.283	1.211	1.274	1.254	1.313	1.356	0.961	0.916
Capana02g002193	72	K	ATPG_TOBAC ATP synthase gamma chain, chloroplastic OS=Nicotiana tabacum GN=ATPC PE=1 SV=1	ATPC	1	0.000573237	82.437	IDSVK(1)NTQK(1)ITEAMK	2	3.3003	18	1.182		1.263	1.234	1.288	1.357		1.005	1.046	1.106	0.715		0.866	0.669	0.868	0.887	0.864	0.879		0.771					0.798	0.842	0.883	0.846	0.833	0.849	1.283	1.211	1.274	1.254	1.313	1.356	0.961	0.916
Capana02g002193	68	K	ATPG_TOBAC ATP synthase gamma chain, chloroplastic OS=Nicotiana tabacum GN=ATPC PE=1 SV=1	ATPC	1	2.44294e-62	208.03	IDSVK(1)NTQK(1)ITEAMK	2	3.3003	65	1.178	0.871	1.107	1.067	1.179	1.162	1.11	1.254	1.286	1.231	1.166	1.027	0.98	0.876	0.918	0.921	0.913	0.888	0.804	0.987	0.803	0.742	0.765	0.766	0.798	0.842	0.883	0.846	0.833	0.849	1.283	1.211	1.274	1.254	1.313	1.356	0.961	0.916
Capana02g002193	347	K	ATPG_TOBAC ATP synthase gamma chain, chloroplastic OS=Nicotiana tabacum GN=ATPC PE=1 SV=1	ATPC	1	1.72749e-231	301.59	MSAMSSATDNASELK(1)K	2	0.55581	180	0.417	0.455	0.549	0.943	0.706	0.989	1.226	1.298	1.368	1.14	0.975	1.194	0.824	0.8	0.749	1.107	0.945	1.045	1.168	1.003	0.974	1.356	1.361	1.409	0.798	0.842	0.883	0.846	0.833	0.849	1.283	1.211	1.274	1.254	1.313	1.356	0.961	0.916
Capana03g003995	456	K	ATPA_SOLTU ATP synthase subunit alpha, chloroplastic OS=Solanum tuberosum GN=atpA PE=3 SV=1	atpA	1	2.6043e-06	126.2	K(1)FLVELR	2	-5.0534	24	0.464	0.489	0.442	0.543	0.529	0.606	0.752	1.095	1.785	1.306	0.664	0.845	1.626	0.629	0.608	1.071	1.144	1.282	1.807	0.903	0.833	1.713	1.416	1.448	0.885	0.928	0.949	0.854	0.897	0.889	1.167	1.161	1.144	1.25	1.264	1.255	0.935	0.937
Capana03g003995	466	K	ATPA_SOLTU ATP synthase subunit alpha, chloroplastic OS=Solanum tuberosum GN=atpA PE=3 SV=1	atpA	1	1.0529e-22	199.04	TYLK(1)TNKPQFQEIISSTK	3	-7.5225	62	0.887	0.779	0.75	0.97	0.893	1.184	1.205	1.416	1.473	1.278	0.736	1.608	1.208	0.854	0.841	0.924	0.886	0.858	1.141	0.722	0.674	0.857	1.042	0.814	0.885	0.928	0.949	0.854	0.897	0.889	1.167	1.161	1.144	1.25	1.264	1.255	0.935	0.937
Capana03g003995	481	K	ATPA_SOLTU ATP synthase subunit alpha, chloroplastic OS=Solanum tuberosum GN=atpA PE=3 SV=1	atpA	1	2.34021e-07	138.23	K(1)FTEEAEALLK	2	-4.8359	24	0.758	0.777	0.773	0.765	0.723	0.689	1.291	1.022	1.046	1.005	1.208	1.226	0.59	0.776	0.747	1.102	1.101	1.05	1.223	1.19	1.156	1.253	1.316	1.212	0.885	0.928	0.949	0.854	0.897	0.889	1.167	1.161	1.144	1.25	1.264	1.255	0.935	0.937
Capana03g003995	266	K	ATPA_SOLTU ATP synthase subunit alpha, chloroplastic OS=Solanum tuberosum GN=atpA PE=3 SV=1	atpA	1	2.43228e-15	121.69	HTLIIYDDLSK(1)QAQAYR	2	-4.106	14	0.936	0.797	0.735	0.689			1.008				1.04	1.179	0.944	1.563	1.485	0.746	0.935				0.941				0.885	0.928	0.949	0.854	0.897	0.889	1.167	1.161	1.144	1.25	1.264	1.255	0.935	0.937
Capana03g003995	114	K	ATPA_SOLTU ATP synthase subunit alpha, chloroplastic OS=Solanum tuberosum GN=atpA PE=3 SV=1	atpA	1	0.00258657	66.664	VVNALAK(1)PIDGR	2	-8.4146	5									0.927	1.071			0.706										1.171	1.124	0.885	0.928	0.949	0.854	0.897	0.889	1.167	1.161	1.144	1.25	1.264	1.255	0.935	0.937
Capana03g003995	480	K	ATPA_SOLTU ATP synthase subunit alpha, chloroplastic OS=Solanum tuberosum GN=atpA PE=3 SV=1	atpA	1	5.64188e-255	289.44	TNKPQFQEIISSTK(1)K	2	-2.7946	76	0.829	0.829	0.873	0.704	0.764	0.893	1.18	1.081	1.309	1.112	1.185	1.245	0.812	0.824	0.834	0.868	0.88	0.914	1.107	1.214	1.108	1.053	1.247	1.137	0.885	0.928	0.949	0.854	0.897	0.889	1.167	1.161	1.144	1.25	1.264	1.255	0.935	0.937
Capana03g003995	469	K	ATPA_SOLTU ATP synthase subunit alpha, chloroplastic OS=Solanum tuberosum GN=atpA PE=3 SV=1	atpA	1	5.69197e-42	205.26	TNK(1)PQFQEIISSTK	2	7.1562	29	0.904	1.026	0.947	1.087	1.023	1.085	1.003	1.044	1.215	1.14	1.128	1.127	1.037	0.983	1.019	0.867	0.902		0.923	0.899		0.847	0.872	0.922	0.885	0.928	0.949	0.854	0.897	0.889	1.167	1.161	1.144	1.25	1.264	1.255	0.935	0.937
Capana12g001382	149	K	ATPD_TOBAC ATP synthase delta chain, chloroplastic OS=Nicotiana tabacum GN=ATPD PE=2 SV=1	ATPD	1	0.000245399	167.76	RVELIK(1)DIVK	2	-4.308	17	0.69		1.299		0.936	0.587	0.688			0.642	1.374	1.541	0.557		0.458	1.024		0.504	1.294	1.383		1.393	0.854	1.776	1.058	1.023	1.061	0.851	0.849	0.769	1.126	1.116	0.986	1.557	1.606	1.567	0.799	0.819
Capana12g001382	221	K	ATPD_TOBAC ATP synthase delta chain, chloroplastic OS=Nicotiana tabacum GN=ATPD PE=2 SV=1	ATPD	1	0.00392342	54.309	YGNSGSK(1)LIDMSVK	2	-5.8455	5		0.725												0.941	1.109	1.084								1.141	1.058	1.023	1.061	0.851	0.849	0.769	1.126	1.116	0.986	1.557	1.606	1.567	0.799	0.819
Capana12g001382	186	K	ATPD_TOBAC ATP synthase delta chain, chloroplastic OS=Nicotiana tabacum GN=ATPD PE=2 SV=1	ATPD	1	5.73522e-55	176.97	LESQHLAQIAK(1)GVQR	2	-2.7201	21		0.925	0.762	0.724	0.685	0.689	1.167		0.601		1.735	1.416	0.626	0.605	0.638	0.882	0.999	0.906	0.998	1.269	1.191	1.074	1.31	1.799	1.058	1.023	1.061	0.851	0.849	0.769	1.126	1.116	0.986	1.557	1.606	1.567	0.799	0.819
Capana12g001382	195	K	ATPD_TOBAC ATP synthase delta chain, chloroplastic OS=Nicotiana tabacum GN=ATPD PE=2 SV=1	ATPD	1	0.00403981	78.178	LTGAK(1)NVR	2	-2.0424	20	0.681	0.707		0.954	0.667		0.865	0.873	0.829	0.99	0.955	1.002		0.664	0.708	1.29		0.701	1.282	0.879	0.679	2.038	1.535	1.7	1.058	1.023	1.061	0.851	0.849	0.769	1.126	1.116	0.986	1.557	1.606	1.567	0.799	0.819
Capana04g000951	103	K	ATPF_SOLTU ATP synthase subunit b, chloroplastic OS=Solanum tuberosum GN=atpF PE=3 SV=1	atpF	1	3.28312e-180	199.84	TLEQLENYK(1)NETIQFEQQR	2	-3.4284	15			1.792			0.878	1.679				1.05		0.63		1.996	0.581	0.554		0.89	1.373	0.793	0.707	0.607	0.471	0.844	0.859	0.904	0.946	0.962	0.957	1.13	1.158	1.157	1.014	1.021	1.025	0.949	0.921
Capana04g000951	58	K	ATPF_SOLTU ATP synthase subunit b, chloroplastic OS=Solanum tuberosum GN=atpF PE=3 SV=1	atpF	1	1.3478e-07	132.39	GGAIEQLEK(1)AR	2	-6.9952	10		0.325		0.443	0.968	0.785							0.964		0.755				1.289	0.982	1.308	2.181			0.844	0.859	0.904	0.946	0.962	0.957	1.13	1.158	1.157	1.014	1.021	1.025	0.949	0.921
Capana04g000951	65	K	ATPF_SOLTU ATP synthase subunit b, chloroplastic OS=Solanum tuberosum GN=atpF PE=3 SV=1	atpF	1	0.00022947	144.47	K(1)VETEAEQFR	2	-5.8282	5			0.563					0.961													0.843	1.304	1.33		0.844	0.859	0.904	0.946	0.962	0.957	1.13	1.158	1.157	1.014	1.021	1.025	0.949	0.921
[truncated: 34 more columns]
