# Supplementary material for: Comprehensive Proteome and Lysine Acetylome Analysis Reveals the Widespread Involvement of Acetylation in Cold Resistance of Pepper (Capsicum annuum L.)
Source: Front Plant Sci. 2021 Aug 27;12:730489. doi: 10.3389/fpls.2021.730489 (PMC8429487; doi:10.3389/fpls.2021.730489)
Supplement: Supplementary Table 10 — A list of acetylation modification sites identified in the carbon fixation in the photosynthetic organism pathway. [file Table_10.XLSX]

## Sheet: Sheet1
Table S10. List of acetylation modification sites identified in the carbon fixation in photosynthetic organisms pathway.
The red font indicates that there is a significant difference in the modification level of acetylation												Modification sites information																								Protein quantitation
The black black indicates that there is no significant difference in the modification level of acetylation												A188												A122												A188												A122
Protein accession	Position	Amino acid	Protein description	Gene name	Localization probability	PEP	Score	Modified sequence	Charge	Mass error [ppm]	MS/MS Count	T0_1	T0_2	T0_3	T1_1	T1_2	T1_3	T2_1	T2_2	T2_3	R1_1	R1_2	R1_3	T0_1	T0_2	T0_3	T1_1	T1_2	T1_3	T2_1	T2_2	T2_3	R1_1	R1_2	R1_3	T0_1	T0_2	T0_3	T1_1	T1_2	T1_3	T2_1	T2_2	T2_3	R1_1	R1_2	R1_3	T0_1	T0_2
Capana10g001955	306	K	ALF_ORYSJ Fructose-bisphosphate aldolase cytoplasmic isozyme OS=Oryza sativa subsp. japonica GN=FBA PE=1 SV=2	FBA	1	2.79068e-05	124.46	ALQQSTLK(1)AWSGK	2	-4.6393	6															0.12	2.087	0.107					0.203		2.483	1.069	1.032	1.001	1.127	1.14	1.11	0.927	0.936	0.905	0.997	1.026	1.048	0.866	0.885
Capana10g001955	354	K	ALF_ORYSJ Fructose-bisphosphate aldolase cytoplasmic isozyme OS=Oryza sativa subsp. japonica GN=FBA PE=1 SV=2	FBA	1	1.76034e-86	266.35	YAGSSHLSEGASESLHVK(1)DYK	3	-5.9691	26	1.419	1.306	1.558	1.426	1.586	1.635	0.688	0.64	0.599	0.813	0.811	0.847	1.302	1.275	1.414	0.928	0.848	0.885	0.729	0.74	0.733	0.579	0.568	0.671	1.069	1.032	1.001	1.127	1.14	1.11	0.927	0.936	0.905	0.997	1.026	1.048	0.866	0.885
Capana10g001955	132	K	ALF_ORYSJ Fructose-bisphosphate aldolase cytoplasmic isozyme OS=Oryza sativa subsp. japonica GN=FBA PE=1 SV=2	FBA	1	0.000164586	150.88	CQK(1)YYAAGAR	2	3.5136	40	0.958	0.944	1.053	0.966	1.225	1.355		0.889		1.302	1.202	1.489	1.055	1.06	1.075	0.887	0.854	0.894	1.082	1.013		0.519	0.61	0.568	1.069	1.032	1.001	1.127	1.14	1.11	0.927	0.936	0.905	0.997	1.026	1.048	0.866	0.885
Capana10g001955	336	K	ALF_ORYSJ Fructose-bisphosphate aldolase cytoplasmic isozyme OS=Oryza sativa subsp. japonica GN=FBA PE=1 SV=2	FBA	1	7.33223e-100	202.51	ANSEATLGK(1)YAGSSHLSEGASESLHVK	3	0.39761	25	1.448	1.468	1.18	1.675	1.918	1.712	0.814	0.759	0.749	0.762	0.627	0.796	1.455	1.434	1.4	0.808	0.691	0.615	0.531	0.749	0.691	0.562	0.606	0.551	1.069	1.032	1.001	1.127	1.14	1.11	0.927	0.936	0.905	0.997	1.026	1.048	0.866	0.885
Capana07g002419	38	K	ALF1_PEA Fructose-bisphosphate aldolase, cytoplasmic isozyme 1 OS=Pisum sativum PE=2 SV=1	---	1	1.12306e-54	144.27	GILAADESTGTIGK(1)R	2	-7.4828	23		0.605	0.635	0.594	0.712	0.724	0.873	1.406	1.406	1.232	0.895	1.537	0.984	0.791	0.692	0.722	0.685	0.61	1.204	0.957	1.016	1.504	1.451	1.763	0.875	0.966	0.975	0.935	0.975	0.997	1.373	1.313	1.362	1.202	1.184	1.122	0.869	0.836
Capana07g002419	163	K	ALF1_PEA Fructose-bisphosphate aldolase, cytoplasmic isozyme 1 OS=Pisum sativum PE=2 SV=1	---	1	2.84235e-12	120.73	ALNDHHVLLEGTLLK(1)PNMVTPGSDSAK	3	-3.3754	16						0.402	1.203	1.335	1.395	0.621	0.645			0.662	0.667	0.631		0.713	1.179	1.072	1.004	1.595	1.437	1.441	0.875	0.966	0.975	0.935	0.975	0.997	1.373	1.313	1.362	1.202	1.184	1.122	0.869	0.836
Capana07g002419	244	K	ALF1_PEA Fructose-bisphosphate aldolase, cytoplasmic isozyme 1 OS=Pisum sativum PE=2 SV=1	---	1	4.74134e-05	103.87	ALQQSTLK(1)TWGGK	2	-4.2819	7							1.244						1.07	0.935	0.938			0.886			0.728	1.199			0.875	0.966	0.975	0.935	0.975	0.997	1.373	1.313	1.362	1.202	1.184	1.122	0.869	0.836
Capana07g002419	17	K	ALF1_PEA Fructose-bisphosphate aldolase, cytoplasmic isozyme 1 OS=Pisum sativum PE=2 SV=1	---	1	0.0022353	74.269	NAK(1)YIATPGK	2	2.4184	14		0.383					1.124	1.231	1.898			0.887		0.47	0.484		1.338	0.88	1.106	0.374			1.623	1.202	0.875	0.966	0.975	0.935	0.975	0.997	1.373	1.313	1.362	1.202	1.184	1.122	0.869	0.836
Capana07g002419	96	K	ALF1_PEA Fructose-bisphosphate aldolase, cytoplasmic isozyme 1 OS=Pisum sativum PE=2 SV=1	---	1	1.03973e-160	258.79	TSDGKPFVELLQEK(1)K	2	3.0816	91	0.948	0.604	0.628	0.975	0.734	0.807	0.737	1.064	1.154	1.192	0.716	0.828	1.137	0.676	0.65	1.203	0.928	0.988	1.079	0.742	0.861	1.385	1.284	2.678	0.875	0.966	0.975	0.935	0.975	0.997	1.373	1.313	1.362	1.202	1.184	1.122	0.869	0.836
Capana07g002419	14	K	ALF1_PEA Fructose-bisphosphate aldolase, cytoplasmic isozyme 1 OS=Pisum sativum PE=2 SV=1	---	1	0.000152847	125.98	YAEELIK(1)NAK	2	-6.3933	26		0.6	0.626	0.981	1.282	0.829	1.215	1.27	1.222	1.341	0.888	1.208	0.93	0.688	0.948	0.647	0.672	0.513	0.907	0.642	0.977	1.43	1.587	1.599	0.875	0.966	0.975	0.935	0.975	0.997	1.373	1.313	1.362	1.202	1.184	1.122	0.869	0.836
Capana02g002621	370	K	ALFC2_ARATH Probable fructose-bisphosphate aldolase 2, chloroplastic OS=Arabidopsis thaliana GN=FBA2 PE=1 SV=2	FBA2	1	0	307.89	ANSLAQLGK(1)YTGEGESDEAK	2	3.4397	180	0.916	0.88	0.89	0.901	0.908	0.933	1.037	1.065	1.088	0.997	0.954	1.032	1.027	0.913	0.968	1.073	1.013	0.992	1.124	1.066	1.029	1.096	1.067	1.033	0.708	0.776	0.899	0.912	0.929	0.919	1.045	1.038	0.96	1.031	1.057	0.972	0.947	1.035
Capana02g002621	276	K	ALFC2_ARATH Probable fructose-bisphosphate aldolase 2, chloroplastic OS=Arabidopsis thaliana GN=FBA2 PE=1 SV=2	FBA2	1	0.000287884	92.707	PSMVTPGAECK(1)EK	2	-12.498	4										0.783			0.867	0.953										1.397	0.708	0.776	0.899	0.912	0.929	0.919	1.045	1.038	0.96	1.031	1.057	0.972	0.947	1.035
Capana02g002621	381	K	ALFC2_ARATH Probable fructose-bisphosphate aldolase 2, chloroplastic OS=Arabidopsis thaliana GN=FBA2 PE=1 SV=2	FBA2	1	3.58375e-20	179.31	YTGEGESDEAK(1)K	2	-5.0141	24	1.138	0.865	1.126	1.207	1.157	1.131	0.945	0.911	0.86	0.86	0.726	0.975	1.064	1.163	1.175	0.942	0.845	0.944	0.936	0.659	0.725	1.257	1.11	1.28	0.708	0.776	0.899	0.912	0.929	0.919	1.045	1.038	0.96	1.031	1.057	0.972	0.947	1.035
Capana02g002621	58	K	ALFC2_ARATH Probable fructose-bisphosphate aldolase 2, chloroplastic OS=Arabidopsis thaliana GN=FBA2 PE=1 SV=2	FBA2	1	0.000248855	115.86	TAK(1)TIASPGR	2	-6.5894	12								0.8	0.809			0.941		0.71		0.737	0.878		0.922	0.8	0.57	1.415	1.687	1.731	0.708	0.776	0.899	0.912	0.929	0.919	1.045	1.038	0.96	1.031	1.057	0.972	0.947	1.035
Capana02g002621	361	K	ALFC2_ARATH Probable fructose-bisphosphate aldolase 2, chloroplastic OS=Arabidopsis thaliana GN=FBA2 PE=1 SV=2	FBA2	1	1.96546e-09	102.1	AK(1)ANSLAQLGK(1)YTGEGESDEAK	2	7.7848	30	0.987			1.088	1.125	0.924		1.176	1.215	1.13	1.324	1.044	0.872		1.117	0.958		1.363		0.963	0.697	0.565	0.452		0.708	0.776	0.899	0.912	0.929	0.919	1.045	1.038	0.96	1.031	1.057	0.972	0.947	1.035
Capana02g002621	79	K	ALFC2_ARATH Probable fructose-bisphosphate aldolase 2, chloroplastic OS=Arabidopsis thaliana GN=FBA2 PE=1 SV=2	FBA2	1	4.29495e-284	273.75	GILAMDESNATCGK(1)R	2	2.1581	114	0.4	0.432	0.503	0.584	0.739	0.701	0.801	1.449	1.388	1.224	0.928	1.32	1.308	1.027	0.722	1.061	0.978	0.922	1.179	1.152	1.103	1.307	1.383	1.386	0.708	0.776	0.899	0.912	0.929	0.919	1.045	1.038	0.96	1.031	1.057	0.972	0.947	1.035
Capana02g002621	340	K	ALFC2_ARATH Probable fructose-bisphosphate aldolase 2, chloroplastic OS=Arabidopsis thaliana GN=FBA2 PE=1 SV=2	FBA2	1	0	275.23	ALQNTCLK(1)TWSGRPENVK	3	-6.0821	61	0.831	0.859	0.788	1.094	1.111		1.03	1.187	1.136	1.048	0.836	1.12	1.137	0.956	0.889	1.156	1.074	1.062	1.039	0.925	0.772	0.965	0.983		0.708	0.776	0.899	0.912	0.929	0.919	1.045	1.038	0.96	1.031	1.057	0.972	0.947	1.035
Capana02g002621	55	K	ALFC2_ARATH Probable fructose-bisphosphate aldolase 2, chloroplastic OS=Arabidopsis thaliana GN=FBA2 PE=1 SV=2	FBA2	1	3.33527e-06	119.94	ASSYADELVK(1)TAK	2	-6.6341	21	0.317	0.399	0.435	0.5	0.651	0.622		1.377	1.262	1.521		1.649	1.197	0.843	0.593	1.29	1.259	1.178	1.112	0.992	0.899	1.492	1.411		0.708	0.776	0.899	0.912	0.929	0.919	1.045	1.038	0.96	1.031	1.057	0.972	0.947	1.035
Capana08g002624	371	K	ALFC2_ARATH Probable fructose-bisphosphate aldolase 2, chloroplastic OS=Arabidopsis thaliana GN=FBA2 PE=1 SV=2	FBA2	1	0.000203951	135.63	TWGGK(1)PENVK	2	-4.7897	32	1.445	0.281	1.497	1.763	0.446	2.129	1.431	1.205	1.225	1.215	0.512	0.617	1.494	0.491	0.396	0.567	0.851	1.216	0.593		0.626				0.793	0.832	0.838	0.879	0.92	0.918	1.027	1.039	1.053	1.112	1.097	1.007	0.969	0.992
Capana08g002624	387	K	ALFC2_ARATH Probable fructose-bisphosphate aldolase 2, chloroplastic OS=Arabidopsis thaliana GN=FBA2 PE=1 SV=2	FBA2	1	1.96546e-09	102.1	AK(1)ANSLAQLGK(1)YTGEGESDEAK	2	7.7848	19	0.987			1.088	1.125	0.924		1.176	1.215	1.13	1.324	1.044	0.872		1.117	0.958		1.363		0.963	0.697	0.565	0.452		0.793	0.832	0.838	0.879	0.92	0.918	1.027	1.039	1.053	1.112	1.097	1.007	0.969	0.992
Capana08g002624	366	K	ALFC2_ARATH Probable fructose-bisphosphate aldolase 2, chloroplastic OS=Arabidopsis thaliana GN=FBA2 PE=1 SV=2	FBA2	1	6.41536e-278	295.98	ALQNTCLK(1)TWGGK(1)PENVK	2	3.2941	89	1.043	0.758	0.989	0.984	1.129	1.341	1.022	1.201	1.191	1.094	0.81	1.045	1.345	1.01	1.009	0.918	1.081	1.016	0.854	0.814	0.721	0.908	0.854	0.862	0.793	0.832	0.838	0.879	0.92	0.918	1.027	1.039	1.053	1.112	1.097	1.007	0.969	0.992
Capana08g002624	396	K	ALFC2_ARATH Probable fructose-bisphosphate aldolase 2, chloroplastic OS=Arabidopsis thaliana GN=FBA2 PE=1 SV=2	FBA2	1	0	307.89	ANSLAQLGK(1)YTGEGESDEAK(1)QK	2	10.266	119	0.911	0.894	0.906	0.895	0.904	0.933	1.052	1.055	1.078	0.987	0.943	1.026	1.025	0.934	0.961	1.068	1.031	0.981	1.132	1.06	1.027	1.092	1.064	1.041	0.793	0.832	0.838	0.879	0.92	0.918	1.027	1.039	1.053	1.112	1.097	1.007	0.969	0.992
Capana08g002624	407	K	ALFC2_ARATH Probable fructose-bisphosphate aldolase 2, chloroplastic OS=Arabidopsis thaliana GN=FBA2 PE=1 SV=2	FBA2	1	3.17769e-166	279.51	YTGEGESDEAK(1)QK	2	0.17657	60	1.142	1.054	1.156	1.298	1.283	1.221	0.966	0.883	0.857	0.988	1.128	0.08	1.206	1.252	1.266	0.817	0.789	0.871	0.797	0.761	0.94	1.033	1.07	1.142	0.793	0.832	0.838	0.879	0.92	0.918	1.027	1.039	1.053	1.112	1.097	1.007	0.969	0.992
Capana02g000489	348	K	ALFC2_ARATH Probable fructose-bisphosphate aldolase 2, chloroplastic OS=Arabidopsis thaliana GN=FBA2 PE=1 SV=2	FBA2	1	1.99452e-14	153.33	YTGEGESEEAK(1)K	2	-4.1806	29	0.98	0.95	0.94	1.067	0.958	0.952	0.829	0.848	0.87	0.889	0.904	0.973	1.189	1.116	1.202	0.891	0.793	0.979	0.871	0.748		1.436	1.211	1.405	0.875	0.896	0.855	0.933	0.907	0.897	0.984	0.94	0.998	0.998	0.972	0.928	1.012	1.041
Capana02g000489	337	K	ALFC2_ARATH Probable fructose-bisphosphate aldolase 2, chloroplastic OS=Arabidopsis thaliana GN=FBA2 PE=1 SV=2	FBA2	1	0	295.61	ASANSLAQLGK(1)YTGEGESEEAK	2	5.5104	116	0.947	1.12	1.145	0.999	1.335	0.929	0.877	0.702	0.69	0.795	1.018	0.971	1.148	1.538	1.264	0.971	0.914	0.899	0.685	0.843	0.658	1.237	1.227	1.09	0.875	0.896	0.855	0.933	0.907	0.897	0.984	0.94	0.998	0.998	0.972	0.928	1.012	1.041
Capana02g000489	307	K	ALFC2_ARATH Probable fructose-bisphosphate aldolase 2, chloroplastic OS=Arabidopsis thaliana GN=FBA2 PE=1 SV=2	FBA2	1	0	362.24	ALQNTCLK(1)TWGGRPENVQAAQEALLTR	3	4.3525	75	0.691	0.766	0.831	1.286	1.155	1.131	0.589	1.155	0.798	1.325	0.804	0.927	1.78	0.891	0.958	1.208	1.203	1.18	0.771	0.715	0.74	0.984	1.074	1.042	0.875	0.896	0.855	0.933	0.907	0.897	0.984	0.94	0.998	0.998	0.972	0.928	1.012	1.041
Capana11g002347	173	K	ALFC3_ARATH Probable fructose-bisphosphate aldolase 3, chloroplastic OS=Arabidopsis thaliana GN=FBA3 PE=1 SV=1	FBA3	1	0.000185328	96.311	SAEYYK(1)QGAR	2	2.6611	39	0.96		0.734	0.966	1.063	1.22	0.888	0.947		1.146	1.057	1.155	0.964	1.019	0.929	0.647	0.678	0.778	0.609		0.732	1.502	1.506	1.5	0.761	0.72	0.805	0.845	0.878	0.891	0.91	0.895	0.964	1.1	1.088	1.173	1.007	1.013
Capana11g002347	342	K	ALFC3_ARATH Probable fructose-bisphosphate aldolase 3, chloroplastic OS=Arabidopsis thaliana GN=FBA3 PE=1 SV=1	FBA3	1	1.85986e-10	128.28	ALQNTVLK(1)TWQGRPENVDAAQK	3	-6.454	7															0.826		0.725		0.78		0.679	1.35	1.33	1.311	0.761	0.72	0.805	0.845	0.878	0.891	0.91	0.895	0.964	1.1	1.088	1.173	1.007	1.013
Capana11g002347	383	K	ALFC3_ARATH Probable fructose-bisphosphate aldolase 3, chloroplastic OS=Arabidopsis thaliana GN=FBA3 PE=1 SV=1	FBA3	1	0.000190322	72.922	YSAEGESEEAK(1)K	2	-6.6247	2								0.407				1.593													0.761	0.72	0.805	0.845	0.878	0.891	0.91	0.895	0.964	1.1	1.088	1.173	1.007	1.013
Capana11g002347	372	K	ALFC3_ARATH Probable fructose-bisphosphate aldolase 3, chloroplastic OS=Arabidopsis thaliana GN=FBA3 PE=1 SV=1	FBA3	1	4.96859e-14	134.49	ANSLAQLGK(1)YSAEGESEEAK	2	-5.4981	34					0.882	0.713	0.481	0.36		0.127	0.54	0.69	0.736		0.895	0.273				2.87		0.736	0.875	3.823	0.761	0.72	0.805	0.845	0.878	0.891	0.91	0.895	0.964	1.1	1.088	1.173	1.007	1.013
Capana11g002347	55	K	ALFC3_ARATH Probable fructose-bisphosphate aldolase 3, chloroplastic OS=Arabidopsis thaliana GN=FBA3 PE=1 SV=1	FBA3	1	0.000248855	115.86	TAK(1)TIASPGR	2	-6.5894	12								0.8	0.809			0.941		0.71		0.737	0.878		0.922	0.8	0.57	1.415	1.687	1.731	0.761	0.72	0.805	0.845	0.878	0.891	0.91	0.895	0.964	1.1	1.088	1.173	1.007	1.013
Capana07g001847	269	K	CAPP1_ARATH Phosphoenolpyruvate carboxylase 1 OS=Arabidopsis thaliana GN=PPC1 PE=1 SV=1	PPC1	1	0.00195398	88.921	HVIEK(1)DIR	2	-5.0986	5										1.233						0.799			1.219		1.215			0.534	1.261	1.173	1.187	1.099	1.119	1.146	1.385	1.382	1.354	1.287	1.285	1.193	0.817	0.785
Capana07g001847	21	K	CAPP1_ARATH Phosphoenolpyruvate carboxylase 1 OS=Arabidopsis thaliana GN=PPC1 PE=1 SV=1	PPC1	1	0.0002585	138.26	ECHVK(1)SPLR	2	-4.9875	15	1.291	1.175	1.127		1.406	1.247	1.177	1.062	1.158				0.887	0.868			0.656	0.678	0.8	0.778	0.69				1.261	1.173	1.187	1.099	1.119	1.146	1.385	1.382	1.354	1.287	1.285	1.193	0.817	0.785
Capana07g001845	245	K	CAPP2_MESCR Phosphoenolpyruvate carboxylase 2 OS=Mesembryanthemum crystallinum GN=PPC2 PE=3 SV=1	PPC2	1	0.014069	69.093	GVPK(1)FLR	2	11.958	5						0.946				0.789						0.841						1.309		1.115	1.148	1.17	1.054	0.971	0.959	0.949	1.45	1.403	1.443	1.286	1.262	1.238	0.809	0.811
Capana07g001845	62	K	CAPP2_MESCR Phosphoenolpyruvate carboxylase 2 OS=Mesembryanthemum crystallinum GN=PPC2 PE=3 SV=1	PPC2	1	6.08428e-58	218.79	ETVQDCYELSAEYEGK(1)HDPQK	3	-5.6535	29	1.638	1.506	1.52	1.31	1.175	1.288	1.329	1.379	1.322	1.007	0.886	1.046	0.665	0.721	0.682	0.677	0.759	0.741	0.806	0.749	0.684			0.109	1.148	1.17	1.054	0.971	0.959	0.949	1.45	1.403	1.443	1.286	1.262	1.238	0.809	0.811
Capana07g001845	176	K	CAPP2_MESCR Phosphoenolpyruvate carboxylase 2 OS=Mesembryanthemum crystallinum GN=PPC2 PE=3 SV=1	PPC2	1	0.00429503	58.286	SLLQK(1)HAR	2	-3.2018	19	1.111	0.838	0.865	1.123	1.004	1.103	1.664	1.493	1.546	1.077	1.07	1.133			0.599	0.664	0.606	0.611	1.024		0.943		0.527		1.148	1.17	1.054	0.971	0.959	0.949	1.45	1.403	1.443	1.286	1.262	1.238	0.809	0.811
Capana09g001643	243	K	F16P1_ARATH Fructose-1,6-bisphosphatase, chloroplastic OS=Arabidopsis thaliana GN=FBP PE=1 SV=2	FBP	1	1.77189e-52	200.82	K(1)YIDDLKDPGPSGK	2	-8.7522	38				1.157	1.108	1.067		1.012	1.03		1.142	1.099	1.006	1.129	1.045		0.77	0.855	0.769		0.865	0.912	1.033		1.171	1.135	1.091	1.073	1.087	1.077	1.231	1.218	1.258	1.12	1.133	1.125	0.886	0.882
Capana09g001643	344	K	F16P1_ARATH Fructose-1,6-bisphosphatase, chloroplastic OS=Arabidopsis thaliana GN=FBP PE=1 SV=2	FBP	1	1.07128e-30	135.13	VPLYIGSTEEVEK(1)LEK	2	-0.71897	21	1.135	0.983	0.938	1.088	1.078	1.118	1.311	1.321	1.172	1.077	0.964	1.052	1.059	0.986			0.837	0.881	0.694	0.829	0.821	0.867	0.791		1.171	1.135	1.091	1.073	1.087	1.077	1.231	1.218	1.258	1.12	1.133	1.125	0.886	0.882
Capana09g001643	256	K	F16P1_ARATH Fructose-1,6-bisphosphatase, chloroplastic OS=Arabidopsis thaliana GN=FBP PE=1 SV=2	FBP	1	7.71841e-16	168.78	YIDDLKDPGPSGK(1)PYSAR	3	-7.0789	36	0.603	0.669	0.768	0.996	1.457	0.865	1.518	1.603	1.439		0.933	1.231	0.881	0.698	0.975		0.681	0.63	0.845	0.944	0.988	0.971	1.225	1.079	1.171	1.135	1.091	1.073	1.087	1.077	1.231	1.218	1.258	1.12	1.133	1.125	0.886	0.882
Capana09g001643	13	K	F16P1_ARATH Fructose-1,6-bisphosphatase, chloroplastic OS=Arabidopsis thaliana GN=FBP PE=1 SV=2	FBP	1	1.68533e-37	156.57	AIETAASFTQTK(1)K	2	0.46321	41	1.122	1.022	0.791	1.529	0.766	1.361	1.302	1.16	1.104	1.075	0.661	0.95	1.028	1.02	0.759	0.95	0.774	0.874	0.867	0.921	0.912	0.881	1.086	1.086	1.171	1.135	1.091	1.073	1.087	1.077	1.231	1.218	1.258	1.12	1.133	1.125	0.886	0.882
Capana09g001643	249	K	F16P1_ARATH Fructose-1,6-bisphosphatase, chloroplastic OS=Arabidopsis thaliana GN=FBP PE=1 SV=2	FBP	1	0.00132512	62.705	YIDDLK(1)DPGPSGK	2	-7.3068	1					1																				1.171	1.135	1.091	1.073	1.087	1.077	1.231	1.218	1.258	1.12	1.133	1.125	0.886	0.882
Capana04g001331	25	K	F16P2_SOLTU Fructose-1,6-bisphosphatase, cytosolic OS=Solanum tuberosum PE=2 SV=1	---	1	8.83364e-92	232.19	FVLNEQTK(1)HPESR	3	3.7586	78	1.118	1.254	1.222	1.202	1.289	1.088	0.922	0.879	0.947	0.887	0.975	0.882	1.065	1.226	1.198	0.92	0.943	0.951	0.714	0.723	0.704	0.965	0.956	0.967	0.978	0.946	0.982	0.971	0.991	0.986	1.188	1.183	1.176	1.022	0.969	0.973	0.984	0.996
Capana04g001331	315	K	F16P2_SOLTU Fructose-1,6-bisphosphatase, cytosolic OS=Solanum tuberosum PE=2 SV=1	---	1	3.03646e-15	112.95	SPIFLGSYDDVEEIK(1)K	2	-0.083421	18	1.179				0.933		1.452	1.241	1.249	1.043	0.743	0.777	1.24	0.982	0.806	0.723		0.755		0.884	0.786	1.209	0.974	1.023	0.978	0.946	0.982	0.971	0.991	0.986	1.188	1.183	1.176	1.022	0.969	0.973	0.984	0.996
Capana04g001331	212	K	F16P2_SOLTU Fructose-1,6-bisphosphatase, cytosolic OS=Solanum tuberosum PE=2 SV=1	---	1	1.23162e-152	252.75	NWDGPTTK(1)YVQSCK(1)YPTDGSSPK	3	4.3303	44	1.136	1.325	1.255	1.383	1.346	1.477	1.137	0.663	1.042	0.949	0.744	0.916	1.285	1.174	1.276	0.909	0.862	0.851	0.683	0.589	0.611	0.753	0.867	0.77	0.978	0.946	0.982	0.971	0.991	0.986	1.188	1.183	1.176	1.022	0.969	0.973	0.984	0.996
Capana04g001331	204	K	F16P2_SOLTU Fructose-1,6-bisphosphatase, cytosolic OS=Solanum tuberosum PE=2 SV=1	---	1	1.34756e-229	278.06	IYSVNEGNAK(1)NWDGPTTK	2	-0.93028	25	1.147	1.171	1.124	0.996		1.174	1.365	1.367	1.356	0.885	0.905	0.974	1.041	1.023	0.926	0.995	0.955	1.031	0.954	0.853	0.866	0.643	0.672	0.578	0.978	0.946	0.982	0.971	0.991	0.986	1.188	1.183	1.176	1.022	0.969	0.973	0.984	0.996
Capana04g001331	227	K	F16P2_SOLTU Fructose-1,6-bisphosphatase, cytosolic OS=Solanum tuberosum PE=2 SV=1	---	1	3.19382e-26	172.1	YPTDGSSPK(1)SLR	2	-6.2127	24	1.378	1.322	1.409	1.626	1.61	1.617	1.002	1.009	0.998	0.775	0.798	0.823	1.27	1.262	1.336	0.854	0.904	0.81	0.618	0.606	0.579	0.455	0.504	0.435	0.978	0.946	0.982	0.971	0.991	0.986	1.188	1.183	1.176	1.022	0.969	0.973	0.984	0.996
Capana04g001331	218	K	F16P2_SOLTU Fructose-1,6-bisphosphatase, cytosolic OS=Solanum tuberosum PE=2 SV=1	---	1	1.56089e-16	172.92	YVQSCK(1)YPTDGSSPK	2	3.5713	45	1.499	1.508	1.418	1.582	1.591	1.605	0.874	1.04	0.886	0.756	0.73	0.781	1.31	1.313	1.355	0.857	0.773	0.771	0.558	0.61	0.613	0.523	0.538	0.51	0.978	0.946	0.982	0.971	0.991	0.986	1.188	1.183	1.176	1.022	0.969	0.973	0.984	0.996
Capana12g001220	25	K	F16P2_SOLTU Fructose-1,6-bisphosphatase, cytosolic OS=Solanum tuberosum PE=2 SV=1	---	1	4.58997e-09	121.96	FVLNEQTK(1)YPESR	2	2.0877	33	0.986	1.064	1.04	1.288		1.247	1.17	1.276	1.193	1.24	1.081	1.198	0.969	0.825	0.819	1.075	0.961		0.799	0.741		0.496		0.53	1.027	1.069	1.035	1.071	1.065	1.089	1.117	1.148	1.118	1.11	1.11	1.119	0.883	0.901
Capana12g001220	204	K	F16P2_SOLTU Fructose-1,6-bisphosphatase, cytosolic OS=Solanum tuberosum PE=2 SV=1	---	1	7.22504e-11	135.5	IYSVNEGNAK(1)NWDGPTSK	2	3.7799	15	1.328		1.151		0.858	1.154	1.22	1.18			0.771			0.785	0.786						0.767				1.027	1.069	1.035	1.071	1.065	1.089	1.117	1.148	1.118	1.11	1.11	1.119	0.883	0.901
Capana12g001220	218	K	F16P2_SOLTU Fructose-1,6-bisphosphatase, cytosolic OS=Solanum tuberosum PE=2 SV=1	---	1	0.00309692	69.641	YVESCK(1)FPEDGSSPK	2	-3.1284	2						1.31							0.69												1.027	1.069	1.035	1.071	1.065	1.089	1.117	1.148	1.118	1.11	1.11	1.119	0.883	0.901
Capana10g000224	288	K	G3P_HOMAM Glyceraldehyde-3-phosphate dehydrogenase OS=Homarus americanus PE=1 SV=2	---	1	0.00182128	81.335	LNK(1)SASYDDVK	2	-8.6266	14				1.36		1.226	0.622	1.111		0.899	0.859	0.87	1.087	1.106	1.17			0.617	1.095	0.626	1.353				1.036	1.059	1.03	0.954	0.974	0.981	0.671	0.651	0.642	1.14	1.172	1.079	0.988	1.006
Capana07g000319	234	K	G3PA_TOBAC Glyceraldehyde-3-phosphate dehydrogenase A, chloroplastic (Fragment) OS=Nicotiana tabacum GN=GAPA PE=2 SV=1	GAPA	1	0.00577674	78.816	VLDQK(1)FGIIK	2	-9.2346	21	0.843		0.838		0.974	0.95	0.713	1.081	0.756	1.449	0.724	0.847	1.622	0.819	0.835	1.193	1.114	1.141	0.824	0.795		1.219	1.149	1.113	1.008	0.964	0.982	0.897	0.899	0.879	1.165	1.216	1.175	1.043	1.055	1.068	0.973	0.95
Capana07g000319	183	K	G3PA_TOBAC Glyceraldehyde-3-phosphate dehydrogenase A, chloroplastic (Fragment) OS=Nicotiana tabacum GN=GAPA PE=2 SV=1	GAPA	1	0.00467343	82.716	HIQAGAK(1)K	2	-0.099156	25	0.851	0.871	0.894	0.501	0.85	0.818	1.029	1.037	1.347	0.896	0.868	0.983	1.105	1.052	1.066	0.769	1.126	0.867	1.141	1.409	1.191	0.874	1.234	1.22	1.008	0.964	0.982	0.897	0.899	0.879	1.165	1.216	1.175	1.043	1.055	1.068	0.973	0.95
Capana07g000319	318	K	G3PA_TOBAC Glyceraldehyde-3-phosphate dehydrogenase A, chloroplastic (Fragment) OS=Nicotiana tabacum GN=GAPA PE=2 SV=1	GAPA	1	0.000587205	90.306	K(1)TFAEEVNAAFR	2	-9.871	2																		0.954				1.046			1.008	0.964	0.982	0.897	0.899	0.879	1.165	1.216	1.175	1.043	1.055	1.068	0.973	0.95
Capana07g000319	239	K	G3PA_TOBAC Glyceraldehyde-3-phosphate dehydrogenase A, chloroplastic (Fragment) OS=Nicotiana tabacum GN=GAPA PE=2 SV=1	GAPA	1	1.69846e-05	67.838	FGIIK(1)GTMTTTHSYTGDQR	3	-7.291	10	0.866							1.289	1.298				1.082		0.816		0.706		1.509	1.21		0.685	0.538		1.008	0.964	0.982	0.897	0.899	0.879	1.165	1.216	1.175	1.043	1.055	1.068	0.973	0.95
Capana07g000319	176	K	G3PA_TOBAC Glyceraldehyde-3-phosphate dehydrogenase A, chloroplastic (Fragment) OS=Nicotiana tabacum GN=GAPA PE=2 SV=1	GAPA	1	3.05488e-26	145.75	EGAGK(1)HIQAGAK	2	2.6146	26	1.01	0.998	1.012	1.039	0.673	0.672	0.809	0.866	0.998	0.947	1.188	1.08	0.979	1.059	1.05	0.917	1.071	1.164	1.194	1.276	0.96	1.093	0.881	1.062	1.008	0.964	0.982	0.897	0.899	0.879	1.165	1.216	1.175	1.043	1.055	1.068	0.973	0.95
Capana12g000555	98	K	G3PB_ARATH Glyceraldehyde-3-phosphate dehydrogenase B, chloroplastic OS=Arabidopsis thaliana GN=GAPB PE=1 SV=2	GAPB	1	0	342.48	NASHLLK(1)YDSMLGTFK	2	4.7382	118	0.958	1.089	1.154	1.091	1.132	1.007	0.962		0.995	0.838	0.927	0.887	1.231	1.238	1.333	0.838	0.892	0.827	0.868	0.95	0.836	0.967	1.024	0.957	0.837	0.862	0.884	0.841	0.817	0.901	1.196	1.152	1.134	1.036	1	0.993	1.052	1.041
Capana12g000555	278	K	G3PB_ARATH Glyceraldehyde-3-phosphate dehydrogenase B, chloroplastic OS=Arabidopsis thaliana GN=GAPB PE=1 SV=2	GAPB	1	0.000291779	87.895	AVSLVLPQLK(1)GK	2	-9.5216	12		0.189	0.24	0.292			2.332	1.696	2.196							1.082	1.057		0.595	0.584	0.557			1.18	0.837	0.862	0.884	0.841	0.817	0.901	1.196	1.152	1.134	1.036	1	0.993	1.052	1.041
Capana12g000555	91	K	G3PB_ARATH Glyceraldehyde-3-phosphate dehydrogenase B, chloroplastic OS=Arabidopsis thaliana GN=GAPB PE=1 SV=2	GAPB	1	8.65722e-152	237.76	KDSPLDVVVVNDSGGVK(1)NASHLLK	3	-8.0681	53	1.179	0.92	1.064	0.633	1.011		1.299	0.691	1.781	0.546	1.21	1.164	0.524		0.891	1.027	1.137	1.052	1.237	1.317	1.202	0.708	0.698	0.709	0.837	0.862	0.884	0.841	0.817	0.901	1.196	1.152	1.134	1.036	1	0.993	1.052	1.041
Capana12g000555	168	K	G3PB_ARATH Glyceraldehyde-3-phosphate dehydrogenase B, chloroplastic OS=Arabidopsis thaliana GN=GAPB PE=1 SV=2	GAPB	1	0.00467343	82.716	HIQAGAK(1)K	2	-0.099156	25	0.851	0.871	0.894	0.501	0.85	0.818	1.029	1.037	1.347	0.896	0.868	0.983	1.105	1.052	1.066	0.769	1.126	0.867	1.141	1.409	1.191	0.874	1.234	1.22	0.837	0.862	0.884	0.841	0.817	0.901	1.196	1.152	1.134	1.036	1	0.993	1.052	1.041
Capana12g000555	415	K	G3PB_ARATH Glyceraldehyde-3-phosphate dehydrogenase B, chloroplastic OS=Arabidopsis thaliana GN=GAPB PE=1 SV=2	GAPB	0.999997	1.85219e-11	159.12	TNPADKECK(1)VYE	2	-3.7017	19		1.48	1.402	1.414	1.471	1.402	0.941	0.969		0.821			1.338	1.333	1.383	0.032	0.867	0.874	0.832		0.859	0.498	0.546	0.54	0.837	0.862	0.884	0.841	0.817	0.901	1.196	1.152	1.134	1.036	1	0.993	1.052	1.041
Capana12g000555	54	K	G3PB_ARATH Glyceraldehyde-3-phosphate dehydrogenase B, chloroplastic OS=Arabidopsis thaliana GN=GAPB PE=1 SV=2	GAPB	1	0.000331653	84.368	LK(1)VAINGFGR	2	-8.2916	22	1.095			0.854		0.955		0.739			0.362	1.334	1.162	0.478	0.519	1.421	1.028	1.094	1.602	0.826	0.842	1.404		1.281	0.837	0.862	0.884	0.841	0.817	0.901	1.196	1.152	1.134	1.036	1	0.993	1.052	1.041
Capana12g000555	107	K	G3PB_ARATH Glyceraldehyde-3-phosphate dehydrogenase B, chloroplastic OS=Arabidopsis thaliana GN=GAPB PE=1 SV=2	GAPB	1	5.63721e-05	105.94	YDSMLGTFK(1)ADVK	2	-4.076	26	0.656		0.983	1.044	1.105	1.067	1.42	1.371	1.105	1.063	0.779	1.005	1.44	0.944	1.066	0.937	1.133	1.06		0.78	0.8	0.814	0.587	0.841	0.837	0.862	0.884	0.841	0.817	0.901	1.196	1.152	1.134	1.036	1	0.993	1.052	1.041
Capana04g000059	123	K	G3PB_PEA Glyceraldehyde-3-phosphate dehydrogenase B, chloroplastic OS=Pisum sativum GN=GAPB PE=2 SV=2	GAPB	1	8.09468e-58	159.84	KDSPLDVLVVNDSGGVK(1)NASHLLK	3	-6.364	24	0.948	1.125	1.216	0.997	1.119	1.041	1.205	1.143	1.127	1.007	0.866	0.851	0.804	1.136	1.02	0.954	0.897	0.956	1.073	1.292	1.296	0.636	0.63	0.663	0.923	0.981	0.949	0.953	0.897	0.923	1.105	1.061	1.064	0.865	0.795	0.764	1.112	1.142
Capana04g000059	155	K	G3PB_PEA Glyceraldehyde-3-phosphate dehydrogenase B, chloroplastic OS=Pisum sativum GN=GAPB PE=2 SV=2	GAPB	1	9.56822e-73	202.72	IVDNETISVDGK(1)HIK	2	-1.9528	44	1.034	1.085	1.112	0.997	1.082	1.046	1.044	0.943	1.017	0.87	0.878	0.891	1.21	1.206	1.178	0.942	0.945	0.936	0.967	1.051	1.069	0.824	0.816	0.856	0.923	0.981	0.949	0.953	0.897	0.923	1.105	1.061	1.064	0.865	0.795	0.764	1.112	1.142
Capana04g000059	130	K	G3PB_PEA Glyceraldehyde-3-phosphate dehydrogenase B, chloroplastic OS=Pisum sativum GN=GAPB PE=2 SV=2	GAPB	1	0	342.48	NASHLLK(1)YDSMLGTFK	2	4.7382	118	0.958	1.089	1.154	1.091	1.132	1.007	0.962		0.995	0.838	0.927	0.887	1.231	1.238	1.333	0.838	0.892	0.827	0.868	0.95	0.836	0.967	1.024	0.957	0.923	0.981	0.949	0.953	0.897	0.923	1.105	1.061	1.064	0.865	0.795	0.764	1.112	1.142
Capana04g000059	139	K	G3PB_PEA Glyceraldehyde-3-phosphate dehydrogenase B, chloroplastic OS=Pisum sativum GN=GAPB PE=2 SV=2	GAPB	1	0.00267311	52.837	YDSMLGTFK(1)AEVK	2	-5.7023	7				0.867				1.23	1.012		0.679		1.128	1.097									0.987		0.923	0.981	0.949	0.953	0.897	0.923	1.105	1.061	1.064	0.865	0.795	0.764	1.112	1.142
Capana00g001096	74	K	G3PC_PETHY Glyceraldehyde-3-phosphate dehydrogenase, cytosolic OS=Petunia hybrida GN=GAPC PE=2 SV=1	GAPC	1	0.00240982	83.358	TLLFGEK(1)SVR	2	-6.5394	2									1.132										0.868						0.912	0.961	1.034	1.089	1.078	1.095	1.028	0.995	0.991	1.049	0.94	1.029	1.037	0.996
Capana00g001096	137	K	G3PC_PETHY Glyceraldehyde-3-phosphate dehydrogenase, cytosolic OS=Petunia hybrida GN=GAPC PE=2 SV=1	GAPC	1	1.32835e-07	117.3	TVDGPSMK(1)DWR	2	-5.8949	21	0.656	0.607	0.681	1.054	0.967	0.958	1.106	1.447	1.136	0.837	0.787	0.912		1.075	0.863			1.349	1	1.115	0.922	1.192	1.186	1.15	0.912	0.961	1.034	1.089	1.078	1.095	1.028	0.995	0.991	1.049	0.94	1.029	1.037	0.996
Capana00g001096	57	K	G3PC_PETHY Glyceraldehyde-3-phosphate dehydrogenase, cytosolic OS=Petunia hybrida GN=GAPC PE=2 SV=1	GAPC	1	3.06122e-63	190.37	YDTVHGQWK(1)HHELK(1)VQDEK	3	4.1728	116	1.321	1.287	1.315	1.194	1.268	1.296	1.013	0.952	0.97	0.95	0.962	0.92	1.081	1.074	1.096	0.778	0.716	0.762	0.871	0.843	0.771	0.842	0.854	0.863	0.912	0.961	1.034	1.089	1.078	1.095	1.028	0.995	0.991	1.049	0.94	1.029	1.037	0.996
Capana00g001096	62	K	G3PC_PETHY Glyceraldehyde-3-phosphate dehydrogenase, cytosolic OS=Petunia hybrida GN=GAPC PE=2 SV=1	GAPC	1	7.00654e-11	164.3	YDTVHGQWK(1)HHELK(1)VQDEK	3	4.1728	27	1.517	1.836	1.48	1.934	1.453	1.478	0.745	0.71	0.714	0.652	0.711	0.747	0.785	0.803	0.826	0.608	1.088	1.031	1.128	0.522		0.581		0.65	0.912	0.961	1.034	1.089	1.078	1.095	1.028	0.995	0.991	1.049	0.94	1.029	1.037	0.996
Capana06g000896	147	K	G3PC_PETHY Glyceraldehyde-3-phosphate dehydrogenase, cytosolic OS=Petunia hybrida GN=GAPC PE=2 SV=1	GAPC	1	1.32286e-15	163.43	TVDGPSAK(1)DWR	2	-5.8052	14			0.461	0.408			1.082			0.956		1.298	1.218	0.863		1.632			1.074	0.787	0.935	1.215	1.11	0.961	0.911	0.877	0.9	0.878	0.893	0.859	0.972	0.994	0.971	1.076	1.063	1.094	1.015	1.039
Capana06g000896	212	K	G3PC_PETHY Glyceraldehyde-3-phosphate dehydrogenase, cytosolic OS=Petunia hybrida GN=GAPC PE=2 SV=1	GAPC	1	2.55169e-05	118.91	EATYDEIK(1)AAIK	2	-6.3367	12			0.714		0.965	1.134	1.278	1.555		1.005	0.709			1.065	0.95		1.075		0.85	0.698					0.911	0.877	0.9	0.878	0.893	0.859	0.972	0.994	0.971	1.076	1.063	1.094	1.015	1.039
Capana06g000896	57	K	G3PC_PETHY Glyceraldehyde-3-phosphate dehydrogenase, cytosolic OS=Petunia hybrida GN=GAPC PE=2 SV=1	GAPC	1	4.24858e-197	253.14	YDSVHGQWK(1)NNEVK(1)VK	2	8.2651	189	0.404	1.454	1.442	1.802	1.741	1.654	0.661	1.111	1.303	1.043	0.932	0.69	1.249	0.505	1.197	0.98	0.904	0.863	0.747	0.633	0.77	0.602	0.623	0.69	0.911	0.877	0.9	0.878	0.893	0.859	0.972	0.994	0.971	1.076	1.063	1.094	1.015	1.039
Capana06g000896	282	K	G3PC_PETHY Glyceraldehyde-3-phosphate dehydrogenase, cytosolic OS=Petunia hybrida GN=GAPC PE=2 SV=1	GAPC	1	0.00410494	88.734	VVDLIK(1)HMASVQ	2	-8.9149	9			0.795		0.169							1.343				1.416	1.02		1.22		0.767	0.987	1.283		0.911	0.877	0.9	0.878	0.893	0.859	0.972	0.994	0.971	1.076	1.063	1.094	1.015	1.039
Capana06g000896	62	K	G3PC_PETHY Glyceraldehyde-3-phosphate dehydrogenase, cytosolic OS=Petunia hybrida GN=GAPC PE=2 SV=1	GAPC	1	1.77001e-30	149.02	YDSVHGQWK(1)NNEVK(1)VK	2	8.2651	34	0.209	1.895	1.844	2.12	2.146	1.92		0.623	0.66	0.732	0.814		0.997		1.149	0.741	0.79	0.816	0.49	0.463	0.459	0.133			0.911	0.877	0.9	0.878	0.893	0.859	0.972	0.994	0.971	1.076	1.063	1.094	1.015	1.039
Capana06g000896	222	K	G3PC_PETHY Glyceraldehyde-3-phosphate dehydrogenase, cytosolic OS=Petunia hybrida GN=GAPC PE=2 SV=1	GAPC	1	0.00227991	119.55	AAIKEESEGK(1)LK	2	-7.9486	2																				0.924		1.076			0.911	0.877	0.9	0.878	0.893	0.859	0.972	0.994	0.971	1.076	1.063	1.094	1.015	1.039
Capana01g000893	237	K	KPPR_WHEAT Phosphoribulokinase, chloroplastic OS=Triticum aestivum PE=2 SV=1	---	1	1.34445e-06	108.24	K(1)PDFDAYIDPQK	2	-8.1183	17	0.751				0.625	0.745	0.95		0.819	0.943	0.922	0.843		0.859	0.819		0.766	1.329		1.045	0.952	1.535	1.543	1.554	0.841	0.87	0.877	0.839	0.831	0.855	1.047	1.073	1.083	1.121	1.118	1.077	0.952	0.919
Capana01g000893	214	K	KPPR_WHEAT Phosphoribulokinase, chloroplastic OS=Triticum aestivum PE=2 SV=1	---	1	0.0103907	69.093	FAWK(1)IQR	2	-7.6395	10									0.935	0.75				0.577		0.905	0.758			0.816	0.675	1.48	1.517	1.586	0.841	0.87	0.877	0.839	0.831	0.855	1.047	1.073	1.083	1.121	1.118	1.077	0.952	0.919
Capana01g000893	148	K	KPPR_WHEAT Phosphoribulokinase, chloroplastic OS=Triticum aestivum PE=2 SV=1	---	1	0.000644212	98.167	ANDFDLMYEQVK(1)AIK	2	1.3976	3																						0.782	1.103	1.116	0.841	0.87	0.877	0.839	0.831	0.855	1.047	1.073	1.083	1.121	1.118	1.077	0.952	0.919
Capana01g000893	230	K	KPPR_WHEAT Phosphoribulokinase, chloroplastic OS=Triticum aestivum PE=2 SV=1	---	1	0.0183952	50.314	GHSLESIK(1)ASIEAR	2	-6.9913	2																							1.155	0.845	0.841	0.87	0.877	0.839	0.831	0.855	1.047	1.073	1.083	1.121	1.118	1.077	0.952	0.919
Capana01g000893	76	K	KPPR_WHEAT Phosphoribulokinase, chloroplastic OS=Triticum aestivum PE=2 SV=1	---	1	1.08239e-139	212.69	TVVIGLAADSGCGK(1)STFMR	2	-1.6021	35	0.667	0.788	0.55	0.938	0.965	1.011	1.793	2.307	1.903		0.642	0.728	1.108	1.014	1.043	0.74	0.644	0.731	0.792	0.812		0.907	1.086	0.831	0.841	0.87	0.877	0.839	0.831	0.855	1.047	1.073	1.083	1.121	1.118	1.077	0.952	0.919
Capana03g003831	119	K	MDHC_MAIZE Malate dehydrogenase, cytoplasmic OS=Zea mays PE=2 SV=2	---	1	0	345.43	SQASALEK(1)HAAPNCK	2	1.8181	153	1.328	1.163	1.184	1.349	1.562	0.911	0.807	0.78	1.014	0.887	0.809	0.973	0.939	1.204	0.947	0.837	0.978	0.951	0.839	0.809	0.984	1.027	0.872	0.846	0.936	0.876	0.863	0.863	0.904	0.936	0.952	0.862	0.919	1.1	1.098	1.096	0.937	0.953
Capana03g003831	151	K	MDHC_MAIZE Malate dehydrogenase, cytoplasmic OS=Zea mays PE=2 SV=2	---	1	0.000271768	108.91	EFAPSIPEK(1)NITCLTR	2	-0.14395	21		0.263	0.434	0.495		0.764	1.164	0.955		1.338	0.764	0.934	1.958	1.127	1.151	1.051	1.074	1.212	1.036	0.896	0.854	1.306	1.022	1.201	0.936	0.876	0.863	0.863	0.904	0.936	0.952	0.862	0.919	1.1	1.098	1.096	0.937	0.953
Capana03g003831	111	K	MDHC_MAIZE Malate dehydrogenase, cytoplasmic OS=Zea mays PE=2 SV=2	---	1	3.24236e-07	128.41	NVSIYK(1)SQASALEK(1)HAAPNCK	3	2.0509	67	1.102	1.131	0.222	0.982	2.129	0.117	0.991	1.027	1.545	1.554	0.363	1.85	0.354	1.514	0.243	1.309	1.291	1.145	1.174	0.497	1.397	0.64	0.722	0.7	0.936	0.876	0.863	0.863	0.904	0.936	0.952	0.862	0.919	1.1	1.098	1.096	0.937	0.953
Capana03g003831	105	K	MDHC_MAIZE Malate dehydrogenase, cytoplasmic OS=Zea mays PE=2 SV=2	---	1	6.43195e-15	172.51	DVMSK(1)NVSIYK(1)SQASALEK	2	8.4133	36	0.993	1.273	1.002	0.892	0.955	0.862	0.788	0.684	0.823	0.848	0.952	0.961	1.189		1.108	0.739	0.794	0.774	0.878	0.938	0.877	1.574	1.557	1.538	0.936	0.876	0.863	0.863	0.904	0.936	0.952	0.862	0.919	1.1	1.098	1.096	0.937	0.953
Capana12g002455	327	K	MDHP_MEDSA Malate dehydrogenase [NADP], chloroplastic OS=Medicago sativa GN=MDH1 PE=2 SV=1	MDH1	1	1.28708e-06	141.93	RGGVLIQK(1)WGR	2	-0.099665	35	1.063	1.075	0.911	1.06	0.992	0.981	1.056	0.893	1.003	1.229	1.186	1.215		0.927	0.889	1.009	0.976	0.926	1.121	1.176	1.103		0.607	0.602	0.835	0.921	0.905	0.905	0.895	0.89	1.021	1.047	1.046	1.075	1.064	1.032	1.039	1.039
Capana12g002455	244	K	MDHP_MEDSA Malate dehydrogenase [NADP], chloroplastic OS=Medicago sativa GN=MDH1 PE=2 SV=1	MDH1	1	3.55933e-16	110.58	NAPNIPAK(1)NFHALTR	2	2.7964	41	0.993	0.862	0.997	0.875	0.883		1.058	0.94	1.002	0.987	1.036	0.969	0.787	0.809	0.844	0.831	0.884	0.946	1.209	1.473	1.395	1.042	1.048	1.129	0.835	0.921	0.905	0.905	0.895	0.89	1.021	1.047	1.046	1.075	1.064	1.032	1.039	1.039
Capana12g002455	71	K	MDHP_MEDSA Malate dehydrogenase [NADP], chloroplastic OS=Medicago sativa GN=MDH1 PE=2 SV=1	MDH1	1	9.44781e-05	121.69	EAQAPTVVQADDPK(1)K	2	-5.2967	14	1.387				1.298	1.168	1.069		0.887	1.11	0.788	0.948	1.13			1.07		0.791		0.694	0.876	0.785			0.835	0.921	0.905	0.905	0.895	0.89	1.021	1.047	1.046	1.075	1.064	1.032	1.039	1.039
Capana12g002455	307	K	MDHP_MEDSA Malate dehydrogenase [NADP], chloroplastic OS=Medicago sativa GN=MDH1 PE=2 SV=1	MDH1	1	0.00609487	48.701	DTK(1)WLEEEFTEK	2	-5.8834	2										0.939			1.061												0.835	0.921	0.905	0.905	0.895	0.89	1.021	1.047	1.046	1.075	1.064	1.032	1.039	1.039
Capana12g002455	96	K	MDHP_MEDSA Malate dehydrogenase [NADP], chloroplastic OS=Medicago sativa GN=MDH1 PE=2 SV=1	MDH1	1	0.00150737	72.042	AEEETGSWK(1)K	2	-6.7321	2																0.755							1.245		0.835	0.921	0.905	0.905	0.895	0.89	1.021	1.047	1.046	1.075	1.064	1.032	1.039	1.039
Capana12g002455	415	K	MDHP_MEDSA Malate dehydrogenase [NADP], chloroplastic OS=Medicago sativa GN=MDH1 PE=2 SV=1	MDH1	1	3.04303e-06	158.37	SEDELLAEK(1)R	2	-8.0697	20				1.298		1.333	1.059			1.184	0.938				1.308				0.899	0.671	1.179	0.57		0.561	0.835	0.921	0.905	0.905	0.895	0.89	1.021	1.047	1.046	1.075	1.064	1.032	1.039	1.039
Capana07g002456	127	K	PGKH_TOBAC Phosphoglycerate kinase, chloroplastic OS=Nicotiana tabacum PE=2 SV=1	---	1	3.47707e-23	169.57	AAIPTIK(1)HLIANGAK	2	-2.7508	67	1.031	1.049	1.123	0.953	0.988	0.961	1.24	1.152	1.404	0.732	0.898	0.899	0.957	1.037	1.068	0.921	0.917	0.959	0.977	0.918	0.924	0.95	0.954	0.987	0.92	0.943	0.967	0.905	0.949	0.992	1.295	1.245	1.231	0.998	1.02	1.003	1.012	1.006
Capana07g002456	206	K	PGKH_TOBAC Phosphoglycerate kinase, chloroplastic OS=Nicotiana tabacum PE=2 SV=1	---	1	0	285.28	FYK(1)EEEK(1)NEPEFAK	2	-39.921	128	0.559	0.704	1.196	1.027	0.679	1.194	1.085	1.241	1.74	0.94	0.878	1.28	0.861	0.988	1.187	1.098	0.972	0.937	1.061	0.909	1.368	0.647	0.7	0.747	0.92	0.943	0.967	0.905	0.949	0.992	1.295	1.245	1.231	0.998	1.02	1.003	1.012	1.006
Capana07g002456	418	K	PGKH_TOBAC Phosphoglycerate kinase, chloroplastic OS=Nicotiana tabacum PE=2 SV=1	---	1	0.00264945	61.48	FAVGTEAIAK(1)K	2	-9.1405	3							0.954															1.127		0.918	0.92	0.943	0.967	0.905	0.949	0.992	1.295	1.245	1.231	0.998	1.02	1.003	1.012	1.006
Capana07g002456	213	K	PGKH_TOBAC Phosphoglycerate kinase, chloroplastic OS=Nicotiana tabacum PE=2 SV=1	---	1	2.01016e-98	238.02	EEEKNEPEFAK(1)K	2	-6.2995	87	0.852	0.876	1.228	1.092	0.733	1.136	0.954	1.024	1.439	0.785	0.909	1.235	0.918	0.849	1.171	0.866	0.775	0.99	1.274	1.146	1.328	0.996	0.638	0.786	0.92	0.943	0.967	0.905	0.949	0.992	1.295	1.245	1.231	0.998	1.02	1.003	1.012	1.006
Capana07g002456	202	K	PGKH_TOBAC Phosphoglycerate kinase, chloroplastic OS=Nicotiana tabacum PE=2 SV=1	---	1	2.94565e-220	277.22	FYK(1)EEEK(1)NEPEFAK	2	-39.921	77	1.598	0.943	0.939	0.976	1.038	0.983	1.406	1.398	1.408	1.12	0.978	1.138	0.826	0.838	0.851	0.915	1.039	0.837	0.819	0.683	0.951	0.749	0.761	0.805	0.92	0.943	0.967	0.905	0.949	0.992	1.295	1.245	1.231	0.998	1.02	1.003	1.012	1.006
Capana07g002456	279	K	PGKH_TOBAC Phosphoglycerate kinase, chloroplastic OS=Nicotiana tabacum PE=2 SV=1	---	1	1.86336e-15	163.09	RPFAAIVGGSK(1)VSSK	2	-8.4295	1			1																						0.92	0.943	0.967	0.905	0.949	0.992	1.295	1.245	1.231	0.998	1.02	1.003	1.012	1.006
Capana07g002456	135	K	PGKH_TOBAC Phosphoglycerate kinase, chloroplastic OS=Nicotiana tabacum PE=2 SV=1	---	1	1.5263e-15	195.09	HLIANGAK(1)VILSSHLGR	3	-13.952	42	1.1	1.095	1.093	0.998	0.954	1.015	1.665	1.455	1.356	0.711	0.775	0.75	0.858	0.967	0.951	0.808	0.812	0.82	0.93	0.921	0.919	0.966	1.027	1.053	0.92	0.943	0.967	0.905	0.949	0.992	1.295	1.245	1.231	0.998	1.02	1.003	1.012	1.006
Capana07g002456	93	K	PGKH_TOBAC Phosphoglycerate kinase, chloroplastic OS=Nicotiana tabacum PE=2 SV=1	---	1	0.000966333	119.52	KSVGDLTAADLK(1)GK	2	-7.3128	3															0.806					1.035	1.159				0.92	0.943	0.967	0.905	0.949	0.992	1.295	1.245	1.231	0.998	1.02	1.003	1.012	1.006
Capana07g002456	151	K	PGKH_TOBAC Phosphoglycerate kinase, chloroplastic OS=Nicotiana tabacum PE=2 SV=1	---	1	1.97959e-18	166.71	GVTPK(1)YSLSPLVPR	2	-3.9286	23	0.452	0.491	0.518	0.635	0.684	0.733	1.083		1.121	1.482	0.774	0.852	1.498	0.787	0.813	1.411	1.319	1.621	0.973	0.945	0.871	1.363	1.262	1.311	0.92	0.943	0.967	0.905	0.949	0.992	1.295	1.245	1.231	0.998	1.02	1.003	1.012	1.006
Capana07g002456	242	K	PGKH_TOBAC Phosphoglycerate kinase, chloroplastic OS=Nicotiana tabacum PE=2 SV=1	---	1	1.50026e-11	133.49	AHASTEGVTK(1)FLK	2	-8.2354	16		0.946		1.174		0.974	1.054	1.088	1.18	0.952	0.951	0.897	1.344		0.933		0.977	0.988	0.697	0.847					0.92	0.943	0.967	0.905	0.949	0.992	1.295	1.245	1.231	0.998	1.02	1.003	1.012	1.006
Capana07g002457	74	K	PGKY_TOBAC Phosphoglycerate kinase, cytosolic OS=Nicotiana tabacum PE=2 SV=1	---	1	1.47765e-85	225.1	GVTPK(1)YSLKPLIPR	2	-1.9365	27	0.989	1.023	1.047	0.883	0.896	0.879	0.969	0.799	0.895	0.987	1.193	1.11	0.867	0.956	0.932	0.91	0.892	0.946	0.934	1.067	1.063	1.24	1.261	1.262	0.774	0.858	0.883	0.88	0.902	0.916	0.984	0.963	0.989	1.222	1.28	1.202	0.938	0.893
Capana07g002457	50	K	PGKY_TOBAC Phosphoglycerate kinase, cytosolic OS=Nicotiana tabacum PE=2 SV=1	---	1	2.86248e-05	115.41	AAVPTIK(1)YLMQNGAR	2	2.0969	18	0.752							0.48		1.424			0.398	0.287		1.045	1.181	0.966	0.859	0.985	0.938	2.157	1.529		0.774	0.858	0.883	0.88	0.902	0.916	0.984	0.963	0.989	1.222	1.28	1.202	0.938	0.893
Capana07g002457	136	K	PGKY_TOBAC Phosphoglycerate kinase, cytosolic OS=Nicotiana tabacum PE=2 SV=1	---	1	1.50959e-09	117.21	EEEKNDPEFSK(1)K	2	-8.8945	14	0.703	0.671		1.686			0.683				0.814	0.966	0.616									1.223	1.355	1.282	0.774	0.858	0.883	0.88	0.902	0.916	0.984	0.963	0.989	1.222	1.28	1.202	0.938	0.893
Capana07g002457	125	K	PGKY_TOBAC Phosphoglycerate kinase, cytosolic OS=Nicotiana tabacum PE=2 SV=1	---	1	1.68474e-172	264.98	FYK(1)EEEK	2	-2.8933	76	1.01	0.968	0.963	1.002	1.066	1.009	1.443	1.435	1.445	1.149	1.003	1.168	0.848	0.86	0.874	0.939	1.066	0.859	0.841	0.701	0.976	0.769	0.781	0.826	0.774	0.858	0.883	0.88	0.902	0.916	0.984	0.963	0.989	1.222	1.28	1.202	0.938	0.893
Capana07g002457	129	K	PGKY_TOBAC Phosphoglycerate kinase, cytosolic OS=Nicotiana tabacum PE=2 SV=1	---	1	5.62129e-72	199.51	FYKEEEK(1)NDPEFSK	2	-1.9717	41	0.772	0.525		1.302	0.633	0.582	0.933	0.901	0.96	1.092	1.163	1.001	0.819	0.922	0.649	0.895	1.046	0.824	1.276	1.192	1.073	1.558	1.46	1.422	0.774	0.858	0.883	0.88	0.902	0.916	0.984	0.963	0.989	1.222	1.28	1.202	0.938	0.893
Capana01g003067	362	K	PPDK_MESCR Pyruvate, phosphate dikinase, chloroplastic OS=Mesembryanthemum crystallinum GN=PPD PE=2 SV=1	PPD	1	7.53982e-47	192.95	ELVENCEILEK(1)HYK	2	5.2553	20	1.058	1.02	1.152	0.952	0.999	0.978	1.047	0.984	0.979			0.537	1.088	1.296	1.163	0.87	0.833	0.998	1.006	0.984	1.057				0.832	0.812	0.785	0.632	0.627	0.637	1.333	1.369	1.325	0.857	0.848	0.874	0.955	0.895
Capana01g003067	233	K	PPDK_MESCR Pyruvate, phosphate dikinase, chloroplastic OS=Mesembryanthemum crystallinum GN=PPD PE=2 SV=1	PPD	1	2.26775e-62	181.87	QLVEQYK(1)NVYIEAK	2	4.9817	24	1.06	1.018	1.035	0.769	0.776	0.806	1.995	2.048	1.965	0.717	0.717	0.722	0.93	0.905	0.903	1.11	1.144	0.985	1.19	1.106	1.155	0.301	0.312	0.332	0.832	0.812	0.785	0.632	0.627	0.637	1.333	1.369	1.325	0.857	0.848	0.874	0.955	0.895
Capana05g001871	190	K	RBL_DEPGR Ribulose bisphosphate carboxylase large chain (Fragment) OS=Deppea grandiflora GN=rbcL PE=3 SV=1	rbcL	1	8.56205e-05	169.97	QK(1)NHGMHFR	2	-5.9739	100	1.212	1.174	1.312	1.164	1.038	1.065	1.17	0.023	1.169	0.599	1.043	1.036	0.807	1.297	1.362	0.61	0.944	1.155	0.997	1.002	1.049	0.809	0.98	0.984	0.954	0.952	0.952	0.964	0.984	1.029	1.155	1.134	1.067	1.034	1.062	1.072	1.089	1.104
Capana05g001871	68	K	RBL_DEPGR Ribulose bisphosphate carboxylase large chain (Fragment) OS=Deppea grandiflora GN=rbcL PE=3 SV=1	rbcL	1	3.03968e-69	237.89	PK(1)LGLSAK(1)NYGR	2	-0.33659	202	0.909	0.854	0.845	1.409	1.073	1.236	0.932	0.884	0.898	1.235	0.723	0.84	1.1	1.175	1.115	0.903	0.909	1.179	1.161	1.097	1.048	0.615	0.944	0.916	0.954	0.952	0.952	0.964	0.984	1.029	1.155	1.134	1.067	1.034	1.062	1.072	1.089	1.104
Capana05g001871	121	K	RBL_DEPGR Ribulose bisphosphate carboxylase large chain (Fragment) OS=Deppea grandiflora GN=rbcL PE=3 SV=1	rbcL	1	0	286.73	AQTETGEIK(1)GHYLNATAGTCEEMMK(1)R	3	-5.1858	192	1.305	1.253	1.253	1.411	1.451	1.449	0.939	1.242	1.197	0.875	0.667	0.858	1.362	1.163	1.195	0.832	0.828	0.749	0.901	0.784	0.74	0.509	0.521	0.517	0.954	0.952	0.952	0.964	0.984	1.029	1.155	1.134	1.067	1.034	1.062	1.072	1.089	1.104
Capana05g001871	137	K	RBL_DEPGR Ribulose bisphosphate carboxylase large chain (Fragment) OS=Deppea grandiflora GN=rbcL PE=3 SV=1	rbcL	1	0	285.99	GHYLNATAGTCEEMMK(1)R	3	-1.6592	621	0.844	1.103	1.323	1.895	0.264	2.208	1.466	1.511	1.473	0.973	0.582	0.239	1.644	1.342	1.743	0.975	0.103	1.408	0.091	1.254	0.913	0.592	0.026	0.027	0.954	0.952	0.952	0.964	0.984	1.029	1.155	1.134	1.067	1.034	1.062	1.072	1.089	1.104
Capana05g001871	60	K	RBL_DEPGR Ribulose bisphosphate carboxylase large chain (Fragment) OS=Deppea grandiflora GN=rbcL PE=3 SV=1	rbcL	1	6.84681e-25	163.59	YGRPLLGCTIK(1)PK	2	-1.8851	92	0.858	0.829	0.863	0.922	0.93	0.945	0.991	1.141	1.081	1.053	0.925	1.105	1.166	0.952	0.929	1.028	0.905	0.974	1.077	0.937	0.906	1.173	1.136	1.173	0.954	0.952	0.952	0.964	0.984	1.029	1.155	1.134	1.067	1.034	1.062	1.072	1.089	1.104
Capana05g001871	49	K	RBL_DEPGR Ribulose bisphosphate carboxylase large chain (Fragment) OS=Deppea grandiflora GN=rbcL PE=3 SV=1	rbcL	1	1.62031e-52	200.96	LNK(1)YGRPLLGCTIK(1)PK	3	-2.3389	157	1.262	1.317	1.334	1.267	1.366	1.107	1.276	1.075	1.471	0.687	0.787	0.664	1.067	1.18	1.143	0.576	0.655	0.648	1.054	1.191	1.152	0.554	0.591	0.575	0.954	0.952	0.952	0.964	0.984	1.029	1.155	1.134	1.067	1.034	1.062	1.072	1.089	1.104
Capana05g001871	86	K	RBL_DEPGR Ribulose bisphosphate carboxylase large chain (Fragment) OS=Deppea grandiflora GN=rbcL PE=3 SV=1	rbcL	1	0	330.54	GGLDFTK(1)DDENVNSQPFMR	2	5.2814	50	1.009	1.022	1.006	1.148	1.148	1.13	0.995	1.027	1.054	0.859	0.973	1.021	1.208	1.297	1.239	0.849	0.845	0.832	0.964	0.95	0.996	0.79	0.827	0.811	0.954	0.952	0.952	0.964	0.984	1.029	1.155	1.134	1.067	1.034	1.062	1.072	1.089	1.104
Capana05g001871	31	K	RBL_DEPGR Ribulose bisphosphate carboxylase large chain (Fragment) OS=Deppea grandiflora GN=rbcL PE=3 SV=1	rbcL	1	3.90148e-201	254.16	VPTAYIK(1)TFQGPPHGIQVER	3	-4.9555	25	1.373	1.277	1.24	1.133	1.084	1.196	1.466	1.297	1.184	0.989	1.023	0.952	1.099	1.201	1.221	0.764	0.746	0.689	0.882	0.932	0.915	0.443	0.436	0.458	0.954	0.952	0.952	0.964	0.984	1.029	1.155	1.134	1.067	1.034	1.062	1.072	1.089	1.104
Capana05g001871	62	K	RBL_DEPGR Ribulose bisphosphate carboxylase large chain (Fragment) OS=Deppea grandiflora GN=rbcL PE=3 SV=1	rbcL	1	3.03968e-69	237.89	PLLGCTIK(1)PK(1)LGLSAK	2	0.0063662	202	1.279	1.349	1.314	1.649	1.608	1.635	0.942	0.836	0.88	0.758	0.859	0.87	1.251	1.355	1.339	1.005	1.016	1.001	0.642	0.749	0.728	0.305	0.312	0.318	0.954	0.952	0.952	0.964	0.984	1.029	1.155	1.134	1.067	1.034	1.062	1.072	1.089	1.104
Capana02g000541	149	K	RBS_CAPAN Ribulose bisphosphate carboxylase small chain, chloroplastic OS=Capsicum annuum GN=RBCS PE=2 SV=1	RBCS	1	0.00384939	101.41	K(1)AYPQAWIR	2	-7.0193	23	0.637	0.46	0.583	0.828	0.825	0.896	0.793	1.191	1.177	1.143	0.76	1.308	1.249	0.902	0.971	0.973	0.892	0.921	1.017	0.703		1.642	1.584	1.545	0.991	0.952	0.971	1.018	1.005	1.022	1.045	1.05	1.034	1.11	1.148	1.109	0.98	0.969
Capana02g000541	148	K	RBS_CAPAN Ribulose bisphosphate carboxylase small chain, chloroplastic OS=Capsicum annuum GN=RBCS PE=2 SV=1	RBCS	1	2.57312e-28	183.7	LPMFGCTDATQVLNEVQEAK(1)K	3	-3.1666	74	0.841	0.866	0.515	0.877	1.293	1.344	0.922	0.846	1.061	1.451	1.525	1.459	1.636	0.49	0.58	1.596	0.364	0.414	1.421	1.903	0.45	0.581	0.534	1.033	0.991	0.952	0.971	1.018	1.005	1.022	1.045	1.05	1.034	1.11	1.148	1.109	0.98	0.969
Capana03g000806	243	K	RPE_SOLTU Ribulose-phosphate 3-epimerase, chloroplastic (Fragment) OS=Solanum tuberosum PE=1 SV=1	---	1	1.56571e-266	293.95	GLNPWIEVDGGVGPK(1)NAYK	2	6.0769	62	1.032	0.843	0.894	1.012	0.962	0.942	1.726	1.671	1.677	1.108	0.965	0.971	1.031	0.908	0.885	0.832	0.864	0.803	0.907	0.894	0.844	0.742	0.777	0.709	0.849	0.886	0.85	0.864	0.873	0.911	1.016	1.074	1.021	1.225	1.312	1.248	0.863	0.8
Capana03g000806	57	K	RPE_SOLTU Ribulose-phosphate 3-epimerase, chloroplastic (Fragment) OS=Solanum tuberosum PE=1 SV=1	---	0.955764	0.014767	59.171	VDK(0.956)FSK(0.044)SDIIVSPSILSANFSK	3	-10.213	2	1.009	0.991																							0.849	0.886	0.85	0.864	0.873	0.911	1.016	1.074	1.021	1.225	1.312	1.248	0.863	0.8
Capana03g000806	141	K	RPE_SOLTU Ribulose-phosphate 3-epimerase, chloroplastic (Fragment) OS=Solanum tuberosum PE=1 SV=1	---	1	1.94154e-11	89.684	VPDFIK(1)AGADIVSVHCEQSSTIHLHR	4	-9.345	16	1.028	0.862		0.767	0.755	0.907	1.51	1.503	1.593	0.987	1.039	0.946		0.794					0.716			0.779	0.907	0.908	0.849	0.886	0.85	0.864	0.873	0.911	1.016	1.074	1.021	1.225	1.312	1.248	0.863	0.8
Capana03g000806	167	K	RPE_SOLTU Ribulose-phosphate 3-epimerase, chloroplastic (Fragment) OS=Solanum tuberosum PE=1 SV=1	---	1	2.42061e-07	123.42	TINQIK(1)SLGAK	2	-8.6488	15	0.674			0.593	0.772			1.447		1.222	0.723	1.226	1.125		0.783		0.786	0.899	1.061	0.85	0.644		2.196		0.849	0.886	0.85	0.864	0.873	0.911	1.016	1.074	1.021	1.225	1.312	1.248	0.863	0.8
Capana05g002020	259	K	S17P_SPIOL Sedoheptulose-1,7-bisphosphatase, chloroplastic OS=Spinacia oleracea PE=2 SV=1	---	1	6.44787e-05	103.23	DTTEIEEGK(1)MFSPGNLR	2	-0.89788	12							0.814		0.921		1.055	1.03	1.153	0.725	0.561	1.187	0.951				0.615		0.882	2.106	0.73	0.814	0.866	0.8	0.856	0.881	1.101	1.089	1.096	1.114	1.092	1.062	0.945	0.964
Capana05g002020	245	K	S17P_SPIOL Sedoheptulose-1,7-bisphosphatase, chloroplastic OS=Spinacia oleracea PE=2 SV=1	---	1	3.27523e-19	186.39	DVPGTHEFLLLDEGK(1)WQHVK	3	1.3439	47	1.26	1.084	1.002	1.001	1.059	1.043	1.316	1.439	1.408	1.073	1.03	1.013	0.905	0.925	0.921	0.748	0.673	0.673	0.691	0.733	0.657	1.057	1.17	1.12	0.73	0.814	0.866	0.8	0.856	0.881	1.101	1.089	1.096	1.114	1.092	1.062	0.945	0.964
Capana05g002020	250	K	S17P_SPIOL Sedoheptulose-1,7-bisphosphatase, chloroplastic OS=Spinacia oleracea PE=2 SV=1	---	1	9.81187e-54	188.88	WQHVK(1)DTTEIEEGK	3	4.4699	35	0.786	1.041	0.938	0.969	0.667	0.8	0.889	0.929	1.011	0.905	0.926	0.965	0.55	1.042	0.927	0.555	0.631	1.139	0.764	0.662	0.641	2.131	2.21	1.923	0.73	0.814	0.866	0.8	0.856	0.881	1.101	1.089	1.096	1.114	1.092	1.062	0.945	0.964
Capana05g002020	368	K	S17P_SPIOL Sedoheptulose-1,7-bisphosphatase, chloroplastic OS=Spinacia oleracea PE=2 SV=1	---	1	1.35457e-66	236.23	TQVAYGSK(1)NEIIR	2	15.99	46	0.871	0.927	0.895	0.851	1.024	0.916	1.214	1.155	1.192	1.144	1.101	1.182	0.915	0.917	0.941	0.972	1.007	0.961	1.017	0.977	0.98	0.898	0.972	0.971	0.73	0.814	0.866	0.8	0.856	0.881	1.101	1.089	1.096	1.114	1.092	1.062	0.945	0.964
Capana05g002020	346	K	S17P_SPIOL Sedoheptulose-1,7-bisphosphatase, chloroplastic OS=Spinacia oleracea PE=2 SV=1	---	1	0.0016634	65.173	AGGYSSDGK(1)QSVLDK	2	-8.8169	3												0.699											0.834	1.466	0.73	0.814	0.866	0.8	0.856	0.881	1.101	1.089	1.096	1.114	1.092	1.062	0.945	0.964
Capana05g002020	307	K	S17P_SPIOL Sedoheptulose-1,7-bisphosphatase, chloroplastic OS=Spinacia oleracea PE=2 SV=1	---	1	2.0689e-05	124.06	EK(1)GIFTNVSSPTAK(1)AK	2	3.3646	24	0.615	0.675	0.678	0.702		0.717	1.517	1.122	1.136	1.072	1.004	1.549	0.797	0.659	0.718	0.879	0.871	0.86	1.095	1.02	0.975		1.64	1.699	0.73	0.814	0.866	0.8	0.856	0.881	1.101	1.089	1.096	1.114	1.092	1.062	0.945	0.964
Capana05g002020	305	K	S17P_SPIOL Sedoheptulose-1,7-bisphosphatase, chloroplastic OS=Spinacia oleracea PE=2 SV=1	---	1	0.000134061	137.4	YTGGMVPDVNQIIVK(1)EK	2	0.91454	22	0.8	0.749	0.668	0.992		0.791	1.525	1.4	1.015	1.24	0.826	0.953	1.201	0.755		0.981	0.963	0.909	0.937	0.789	0.759	1.278	1.294	1.175	0.73	0.814	0.866	0.8	0.856	0.881	1.101	1.089	1.096	1.114	1.092	1.062	0.945	0.964
Capana05g002020	319	K	S17P_SPIOL Sedoheptulose-1,7-bisphosphatase, chloroplastic OS=Spinacia oleracea PE=2 SV=1	---	1	1.25012e-33	162.21	GIFTNVSSPTAK(1)AK	2	-8.5262	15			0.275				0.462	1.287		1.164	0.817	1.779				0.964	0.838	0.942	1.264	0.838	0.735		1.39	1.246	0.73	0.814	0.866	0.8	0.856	0.881	1.101	1.089	1.096	1.114	1.092	1.062	0.945	0.964
Capana05g002020	284	K	S17P_SPIOL Sedoheptulose-1,7-bisphosphatase, chloroplastic OS=Spinacia oleracea PE=2 SV=1	---	1	0.0109935	61.48	LIDYYVK(1)EK	2	-5.9482	5								0.802				0.768										1.214	1.068	1.148	0.73	0.814	0.866	0.8	0.856	0.881	1.101	1.089	1.096	1.114	1.092	1.062	0.945	0.964
Capana02g000067	397	K	TKTC_SOLTU Transketolase, chloroplastic OS=Solanum tuberosum PE=2 SV=1	---	1	0.00074585	99.34	K(1)YPEEAADLK	2	-7.4877	23	0.545	0.766	0.651	0.561	1.073	1.142	1.451	1.423	1.37	1.171	0.784	1.193	1.301	1.101	1.019	1.078		0.899	0.9	0.413	0.888	1.01	1.158	1.102	0.972	0.936	0.967	0.946	1.016	1.021	1.261	1.23	1.24	1.025	1.033	1.03	0.907	0.942
Capana02g000067	294	K	TKTC_SOLTU Transketolase, chloroplastic OS=Solanum tuberosum PE=2 SV=1	---	1	0.0139089	40.372	FESLGWHVIWVK(1)NGNTGYDEIR	3	-2.8978	1								1																	0.972	0.936	0.967	0.946	1.016	1.021	1.261	1.23	1.24	1.025	1.033	1.03	0.907	0.942
Capana02g000067	370	K	TKTC_SOLTU Transketolase, chloroplastic OS=Solanum tuberosum PE=2 SV=1	---	1	1.72657e-11	115.29	NNLGWPYEPFHVPGDVK(1)THWSR	3	-5.8903	10	0.784	0.854	0.874	0.794	0.808		1.268	1.414	1.263	0.941															0.972	0.936	0.967	0.946	1.016	1.021	1.261	1.23	1.24	1.025	1.033	1.03	0.907	0.942
Capana02g000067	83	K	TKTC_SOLTU Transketolase, chloroplastic OS=Solanum tuberosum PE=2 SV=1	---	1	2.9654e-12	129.69	TDAALVEK(1)SVNTIR	2	-4.7313	23	0.836	0.855	0.75	0.892	1.02	0.695	1.389	1.28	1.317		0.782	1.115	0.956	0.957	0.92	1.057	0.902	0.909	1.033	0.973	1.027	1.057	1.206	1.072	0.972	0.936	0.967	0.946	1.016	1.021	1.261	1.23	1.24	1.025	1.033	1.03	0.907	0.942
Capana02g000067	390	K	TKTC_SOLTU Transketolase, chloroplastic OS=Solanum tuberosum PE=2 SV=1	---	1	1.62574e-05	93.026	HTSEGAALETEWNAK(1)FAEYEK	2	8.5679	9	1.111			0.893	0.929	1.011		0.936	1.12																0.972	0.936	0.967	0.946	1.016	1.021	1.261	1.23	1.24	1.025	1.033	1.03	0.907	0.942
Capana02g000067	396	K	TKTC_SOLTU Transketolase, chloroplastic OS=Solanum tuberosum PE=2 SV=1	---	1	0.0186748	51.43	FAEYEK(1)K	2	-4.0905	7					0.602		1.837					0.793			0.689	1.047		0.786				1.246			0.972	0.936	0.967	0.946	1.016	1.021	1.261	1.23	1.24	1.025	1.033	1.03	0.907	0.942
Capana05g001001	350	K	TKTC_SOLTU Transketolase, chloroplastic OS=Solanum tuberosum PE=2 SV=1	---	1	0.000217016	63.883	ANSYSVHGSALGAK(1)EVEATR	2	-0.17588	8							0.354	1.087									1.322					1.237			0.793	0.858	0.892	0.888	0.951	0.99	1.149	1.089	1.098	1.047	1.008	1.022	1.009	1.028
Capana05g001001	130	K	TKTC_SOLTU Transketolase, chloroplastic OS=Solanum tuberosum PE=2 SV=1	---	1	1.06466e-07	167.04	YNPK(1)NPYWFNR	2	-0.17859	25	0.805	0.781	0.938	1.226	1.239	1.324	1.103	1.381	1.562	0.861	0.614	1.208	1.055	1.071	1.097	0.808	0.893	0.961	1.095	0.772	0.793	0.824	0.853	0.737	0.793	0.858	0.892	0.888	0.951	0.99	1.149	1.089	1.098	1.047	1.008	1.022	1.009	1.028
Capana05g001001	373	K	TKTC_SOLTU Transketolase, chloroplastic OS=Solanum tuberosum PE=2 SV=1	---	1	1.10172e-62	124.69	QNLGWPYEPFHVPEDVK(1)SHWSR	3	-5.8846	10	1.021						1.476	1.336	1.391	1.114	0.337											0.807		0.518	0.793	0.858	0.892	0.888	0.951	0.99	1.149	1.089	1.098	1.047	1.008	1.022	1.009	1.028
Capana05g001001	400	K	TKTC_SOLTU Transketolase, chloroplastic OS=Solanum tuberosum PE=2 SV=1	---	1	0.00074585	99.34	K(1)YPEEAADLK	2	-7.4877	23	0.545	0.766	0.651	0.561	1.073	1.142	1.451	1.423	1.37	1.171	0.784	1.193	1.301	1.101	1.019	1.078		0.899	0.9	0.413	0.888	1.01	1.158	1.102	0.793	0.858	0.892	0.888	0.951	0.99	1.149	1.089	1.098	1.047	1.008	1.022	1.009	1.028
Capana05g001001	585	K	TKTC_SOLTU Transketolase, chloroplastic OS=Solanum tuberosum PE=2 SV=1	---	1	1.00711e-241	285.55	PADGNETAGAYK(1)VAILK	2	-2.6203	25	0.926	1.003	0.968	0.974	0.896	1.018	1.01	0.937	0.934	0.891	0.834	0.822	1.111	1.135	1.11	1.104	1.05	1.132	0.925	0.991	0.978	1.028	1.144	1.079	0.793	0.858	0.892	0.888	0.951	0.99	1.149	1.089	1.098	1.047	1.008	1.022	1.009	1.028
Capana05g001001	336	K	TKTC_SOLTU Transketolase, chloroplastic OS=Solanum tuberosum PE=2 SV=1	---	1	9.85154e-59	234.3	VTTTIGFGSPNK(1)ANSYSVHGSALGAK	3	0.66425	59	0.914	0.826	0.957	0.899	1.022	1.055	1.424	1.619	1.639	0.958	0.815	1.046	1.211	0.847	0.763	1.028	0.868	0.962	1.276	1.067	0.969	0.595	0.621	0.619	0.793	0.858	0.892	0.888	0.951	0.99	1.149	1.089	1.098	1.047	1.008	1.022	1.009	1.028
Capana05g001001	727	K	TKTC_SOLTU Transketolase, chloroplastic OS=Solanum tuberosum PE=2 SV=1	---	1	0.000183459	108.34	IYK(1)EYGITAEAVIAAAK	2	-0.97348	3							1.004	1.065	0.931																0.793	0.858	0.892	0.888	0.951	0.99	1.149	1.089	1.098	1.047	1.008	1.022	1.009	1.028
Capana05g001001	393	K	TKTC_SOLTU Transketolase, chloroplastic OS=Solanum tuberosum PE=2 SV=1	---	1	1.0451e-46	168.78	HVPEGAALEAGWNTK(1)FAEYEK	3	-2.3243	65	0.458	0.521	0.432	0.717	0.728	0.863	0.833	1.132	3.361	1.278	0.649	0.749	2.513	0.672	0.665	1.067	1.253	1.282	1.05	0.759	0.647	0.781	0.779	0.811	0.793	0.858	0.892	0.888	0.951	0.99	1.149	1.089	1.098	1.047	1.008	1.022	1.009	1.028
Capana05g001001	399	K	TKTC_SOLTU Transketolase, chloroplastic OS=Solanum tuberosum PE=2 SV=1	---	1	0.0186748	51.43	FAEYEK(1)K	2	-4.0905	7					0.602		1.837					0.793			0.689	1.047		0.786				1.246			0.793	0.858	0.892	0.888	0.951	0.99	1.149	1.089	1.098	1.047	1.008	1.022	1.009	1.028
Capana05g001001	477	K	TKTC_SOLTU Transketolase, chloroplastic OS=Solanum tuberosum PE=2 SV=1	---	1	8.09396e-92	232.17	MFGDFQK(1)NTPEER	2	1.5966	90	1.017	1.014	0.986	1.004	1.015	1.137	0.97	0.968	0.955	0.937	0.903	1.05	1.348	1.307	1.337	0.773	0.834	0.868	0.833	0.778	0.782	1.052	1.088	1.044	0.793	0.858	0.892	0.888	0.951	0.99	1.149	1.089	1.098	1.047	1.008	1.022	1.009	1.028
Capana05g001001	86	K	TKTC_SOLTU Transketolase, chloroplastic OS=Solanum tuberosum PE=2 SV=1	---	1	0.000382727	84.999	TDNALVEK(1)SVNTIR	2	-6.7055	8					0.546			1.015							0.791		0.929	1.294		1.056				1.369	0.793	0.858	0.892	0.888	0.951	0.99	1.149	1.089	1.098	1.047	1.008	1.022	1.009	1.028
Capana08g002681	152	K	TPIC_SPIOL Triosephosphate isomerase, chloroplastic OS=Spinacia oleracea GN=TPIP1 PE=1 SV=1	TPIP1	1	2.00278e-73	196.38	DLGCK(1)WVILGHSER	2	-1.5879	29	1.11	1.101	1.046	1.152	1.179	1.15	0.792	0.766	0.771	0.924	0.979	0.922	1.073	1.09	1.063	0.943	0.9	0.939	0.824	0.839	0.767	1.202	1.242	1.227	0.859	0.846	0.847	0.899	0.876	0.879	1.002	0.963	1.022	1.11	1.098	1.095	0.845	0.894
Capana08g002681	147	K	TPIC_SPIOL Triosephosphate isomerase, chloroplastic OS=Spinacia oleracea GN=TPIP1 PE=1 SV=1	TPIP1	1	3.14685e-54	184.65	GGAFTGEISVEQVK(1)DLGCK	2	-0.82666	17	1.055			1.344	1.177			1.179	1.801	0.599	0.571	1.211	0.636	1.237		1.099	1.002			0.76	0.367			0.964	0.859	0.846	0.847	0.899	0.876	0.879	1.002	0.963	1.022	1.11	1.098	1.095	0.845	0.894
Capana08g002681	282	K	TPIC_SPIOL Triosephosphate isomerase, chloroplastic OS=Spinacia oleracea GN=TPIP1 PE=1 SV=1	TPIP1	1	2.35148e-82	176	IIYGGSVNGSNSSDLAK(1)K	2	-2.4906	43	0.849	0.813	0.684	0.706	0.705	0.64	0.937	0.811	0.978	1.098	1.069	1.397	0.815	0.964	1.007	0.801	0.511	0.981	1.169	1.161	1.032		2.105	1.766	0.859	0.846	0.847	0.899	0.876	0.879	1.002	0.963	1.022	1.11	1.098	1.095	0.845	0.894
Capana08g002681	263	K	TPIC_SPIOL Triosephosphate isomerase, chloroplastic OS=Spinacia oleracea GN=TPIP1 PE=1 SV=1	TPIP1	1	2.2802e-07	156.57	NVSAEVASK(1)TR	2	-5.4332	8							1.498	1.468	1.155														0.541	0.337	0.859	0.846	0.847	0.899	0.876	0.879	1.002	0.963	1.022	1.11	1.098	1.095	0.845	0.894
Capana08g002681	81	K	TPIC_SPIOL Triosephosphate isomerase, chloroplastic OS=Spinacia oleracea GN=TPIP1 PE=1 SV=1	TPIP1	1	1.94917e-06	97.084	FFVGGNWK(1)CNGTK(1)DSISK	2	5.4735	3			0.826		0.986	1.189																			0.859	0.846	0.847	0.899	0.876	0.879	1.002	0.963	1.022	1.11	1.098	1.095	0.845	0.894
Capana08g002681	254	K	TPIC_SPIOL Triosephosphate isomerase, chloroplastic OS=Spinacia oleracea GN=TPIP1 PE=1 SV=1	TPIP1	1	1.2673e-12	126.48	DWLTK(1)NVSAEVASK	2	-3.7716	2							0.864		1.136																0.859	0.846	0.847	0.899	0.876	0.879	1.002	0.963	1.022	1.11	1.098	1.095	0.845	0.894
Capana08g002681	201	K	TPIC_SPIOL Triosephosphate isomerase, chloroplastic OS=Spinacia oleracea GN=TPIP1 PE=1 SV=1	TPIP1	1	9.00042e-64	186.27	EAGK(1)TFDVCFQQLK	2	-4.2611	23	0.479	0.44	0.586	0.881	0.857	0.851	0.57	0.925		1.392	0.695	0.954	1.638	0.933	0.858	1.311	1.07	1.069	0.76	0.715	0.924	1.533	1.865	1.692	0.859	0.846	0.847	0.899	0.876	0.879	1.002	0.963	1.022	1.11	1.098	1.095	0.845	0.894
Capana08g002681	174	K	TPIC_SPIOL Triosephosphate isomerase, chloroplastic OS=Spinacia oleracea GN=TPIP1 PE=1 SV=1	TPIP1	1	2.38e-28	166.65	RHIIGENDEFIGK(1)K	2	-8.5552	29	0.868	0.749			0.939		0.864	0.692	0.814			1.033	0.9	0.937				0.788	0.733		0.693	1.674	1.616	1.698	0.859	0.846	0.847	0.899	0.876	0.879	1.002	0.963	1.022	1.11	1.098	1.095	0.845	0.894
Capana08g002681	76	K	TPIC_SPIOL Triosephosphate isomerase, chloroplastic OS=Spinacia oleracea GN=TPIP1 PE=1 SV=1	TPIP1	1	1.94917e-06	97.084	FFVGGNWK(1)CNGTK(1)DSISK	2	5.4735	17	0.744		0.944	1.1	1.126	2.179		0.806		0.849	0.903	0.765	0.963			0.706						0.856		1.059	0.859	0.846	0.847	0.899	0.876	0.879	1.002	0.963	1.022	1.11	1.098	1.095	0.845	0.894
Capana08g002681	311	K	TPIC_SPIOL Triosephosphate isomerase, chloroplastic OS=Spinacia oleracea GN=TPIP1 PE=1 SV=1	TPIP1	1	1.01977e-83	210.4	GPEFATIVNSVTSK(1)K	2	4.7309	9																			0.348	0.246		1.609	1.4	1.397	0.859	0.846	0.847	0.899	0.876	0.879	1.002	0.963	1.022	1.11	1.098	1.095	0.845	0.894
Capana05g000346	4	K	TPIS_PETHY Triosephosphate isomerase, cytosolic OS=Petunia hybrida GN=TPIP1 PE=2 SV=1	TPIP1	1	0.00258982	129.56	K(1)FFVGGNWK	2	-8.8846	25	0.771	0.533	0.679	1.022	0.962	0.919	0.665	1.009	1.218	1.591	0.966	1.018	1.459	0.899	0.809	0.916	0.897	0.884	0.949	0.762	0.675	1.552	1.426	1.417	0.955	0.793	0.888	0.968	0.947	0.93	0.889	0.942	0.945	1.349	1.222	1.243	0.83	0.799
Capana05g000346	21	K	TPIS_PETHY Triosephosphate isomerase, cytosolic OS=Petunia hybrida GN=TPIP1 PE=2 SV=1	TPIP1	1	1.82203e-07	159.11	CNGTSDEIK(1)K	2	-5.3944	26	1.34	1.388		1.556	1.51	1.54	0.956		0.964				1.003			0.774	0.775	0.387	0.787	0.758	0.703	0.56			0.955	0.793	0.888	0.968	0.947	0.93	0.889	0.942	0.945	1.349	1.222	1.243	0.83	0.799
Capana05g000346	70	K	TPIS_PETHY Triosephosphate isomerase, cytosolic OS=Petunia hybrida GN=TPIP1 PE=2 SV=1	TPIP1	1	7.93221e-120	263.12	NELRPDFHVAAQNCWVK(1)K	3	-0.91036	73	1.422	1.44	1.459	1.462	1.559	1.595	1.15	1.226	1.268	1.198	1.096	1.291	1.155	1.034	1.013	0.376	0.353	0.357	0.473	0.436	0.416	0.741	0.77	0.71	0.955	0.793	0.888	0.968	0.947	0.93	0.889	0.942	0.945	1.349	1.222	1.243	0.83	0.799
[truncated: 34 more columns]
